# Supplementary material for: Salt-Specific Gene Expression Reveals Elevated Auxin Levels in Arabidopsis thaliana Plants Grown Under Saline Conditions
Source: Front Plant Sci. 2022 Feb 10;13:804716. doi: 10.3389/fpls.2022.804716 (PMC8866861; doi:10.3389/fpls.2022.804716)
Supplement: Supplementary file 2 [file Table_1.XLSX]

## Sheet: Supp. table 1
Table 1: The salt-specific and osmotic gene lists																																								*lists presented as Arabidopsis gene accession numbers accoring to TAIR (https://www.arabidopsis.org/)
Salt-specific induced gene list (2519)										Salt-specific repressed gene list (2272)										Osmotic induced gene list (2170)										Osmotic repressed gene list (2281)										*The number in brackets represents the number of genes in each list
Gene_ID	Gene name/description	50 NaCl log2FC	75 NaCl log2FC	100 NaCl log2FC	125 NaCl log2FC	100 sorb log2FC	150 Sorb log2FC	200 Sorb log2FC	250 Sorb log2FC	Gene_ID	Gene name/description	50 NaCl log2FC	75 NaCl log2FC	100 NaCl log2FC	125 NaCl log2FC	100 sorb log2FC	150 Sorb log2FC	200 Sorb log2FC	250 Sorb log2FC	Gene_ID	Gene name/description	50 NaCl log2FC	75 NaCl log2FC	100 NaCl log2FC	125 NaCl log2FC	100 sorb log2FC	150 Sorb log2FC	200 Sorb log2FC	250 Sorb log2FC	Gene_ID	Gene name/description	50 NaCl log2FC	75 NaCl log2FC	100 NaCl log2FC	125 NaCl log2FC	100 sorb log2FC	150 Sorb log2FC	200 Sorb log2FC	250 Sorb log2FC	* Log2 Fold change calculated relative to expression in the untreated control
AT1G01030	NGA3 (NGATHA3); transcription factor	0.120129	0.27886	0.724523	0.66747	-0.435054	-0.190862	0.324335	-0.222026	AT1G01040	DCL1 (DICER-LIKE1); ATP-dependent helicase/ ribonuclease III	-0.122936	-0.0842084	-0.43532	-0.218754	0.066233	-0.101246	0.0456746	-0.0156638	AT1G01070	nodulin MtN21 family protein	0.934597	0.630039	1.10551	1.03671	0.118966	0.612142	0.262033	0.36684	AT1G01260	basic helix-loop-helix (bHLH) family protein	-0.171118	-0.1188	-0.285993	-0.589032	-0.258509	-0.212501	-0.0657461	-0.453221
AT1G01100	60S acidic ribosomal protein P1 (RPP1A)	-0.230503	0.0358036	0.0937642	0.0556106	-0.424225	-0.482061	0.16058	-0.770937	AT1G01110	IQD18 (IQ-domain 18)	-0.106737	-0.109592	-0.626307	-1.14009	-0.280417	-0.0993918	0.114174	0.15788	AT1G01120	KCS1 (3-KETOACYL-COA SYNTHASE 1); acyltransferase	0.0907989	0.673126	0.798571	0.775308	0.420121	0.283075	0.407842	0.55425	AT1G01340	ATCNGC10 (CYCLIC NUCLEOTIDE GATED CHANNEL 10); calmodulin binding / cyclic nucleotide binding / ion channel	-0.855357	-1.02969	-1.41039	-2.01644	-1.48624	-1.2363	-1.73201	-1.51627
AT1G01140	CIPK9 (CBL-INTERACTING PROTEIN KINASE 9); kinase	0.782475	0.725178	0.849528	0.948989	0.0423619	0.18303	-0.206821	-0.0375249	AT1G01453	hypothetical protein	-0.179814	-0.998844	-1.66985	-2.4192	-0.579337	0.280414	-0.77278	-0.574825	AT1G01250	AP2 domain-containing transcription factor, putative	1.11703	0.865392	1.41393	1.34792	1.64673	2.05555	1.939	2.49958	AT1G01360	hypothetical protein	-0.0921132	-0.254673	-0.280522	-0.358005	-0.160335	-0.195251	-0.377131	-0.207979
AT1G01210	DNA-directed RNA polymerase III family protein	0.0577463	0.0839037	0.108337	0.0468069	-0.0752212	-0.0355203	0.173998	-0.096421	AT1G01490	heavy-metal-associated domain-containing protein	-0.215687	-0.4243	-0.328451	-0.36758	-0.131082	-0.0219873	-0.253554	-0.238921	AT1G01380	ETC1 (ENHANCER OF TRY AND CPC 1); DNA binding / transcription factor	0.754368	0.387561	0.603604	0.57006	0.339182	0.572615	0.395988	0.438431	AT1G01390	UDP-glucoronosyl/UDP-glucosyl transferase family protein	-0.583841	-0.994676	-2.13479	-3.01482	-0.371158	-0.314714	-0.820006	-0.683182
AT1G01350	nucleic acid binding	0.130807	0.0579816	0.151815	0.315453	0.187858	0.171648	0.126606	0.427791	AT1G01620	PIP1C (PLASMA MEMBRANE INTRINSIC PROTEIN 1;3); water channel	-0.229083	-0.296909	-0.603305	-1.11619	-0.228267	-0.15748	-0.349253	-0.661606	AT1G01420	UDP-glucoronosyl/UDP-glucosyl transferase family protein	0.402402	0.128129	0.283848	0.320416	0.448525	0.80447	0.610909	1.07235	AT1G01480	ACS2 (1-Amino-cyclopropane-1-carboxylate synthase 2)	-0.23963	-1.01063	-0.384057	-0.251504	-1.00123	-0.554962	-1.11432	-1.08104
AT1G01560	ATMPK11 (Arabidopsis thaliana MAP kinase 11); MAP kinase/ kinase	0.272051	1.07221	1.0995	0.670256	-0.18398	0.578948	0.454625	0.201072	AT1G01780	LIM domain-containing protein	-0.259937	-0.208503	-0.425542	-0.643761	-0.04004	-0.0823698	0.00894939	-0.452824	AT1G01430	hypothetical protein	0.346608	0.129239	0.293306	0.375166	0.348827	0.351897	0.163812	0.444737	AT1G01620	PIP1C (PLASMA MEMBRANE INTRINSIC PROTEIN 1;3); water channel	-0.229083	-0.296909	-0.603305	-1.11619	-0.228267	-0.15748	-0.349253	-0.661606
AT1G01580	FRO2 (FERRIC REDUCTION OXIDASE 2); ferric-chelate reductase	0.8233	0.557051	0.992785	0.664142	2.22456	0.286472	-0.767119	0.533716	AT1G02090	FUS5 (FUSCA 5); MAP kinase kinase	-0.0373622	-0.0479214	-0.200948	-0.316485	-0.243481	-0.0221094	-0.0112084	0.0537755	AT1G01470	LEA14 (LATE EMBRYOGENESIS ABUNDANT 14)	0.424369	0.300486	0.576195	0.91735	1.1116	0.938568	0.87583	0.875821	AT1G01640	speckle-type POZ protein-related	-0.466392	-0.344245	-0.326273	-0.62982	-0.245978	-0.495487	-0.466619	-0.696533
AT1G01720	ATAF1 (Arabidopsis NAC domain containing protein 2); transcription factor	0.460832	0.407204	0.891275	0.981855	-0.142522	0.382277	0.24371	0.592761	AT1G02100	leucine carboxyl methyltransferase family protein	-0.196626	-0.0600429	-0.00497476	0.0245968	-0.277747	-0.264235	-0.153777	-0.418051	AT1G01570	fringe-related protein	0.312757	0.520494	0.771467	0.818721	0.556591	0.704632	0.745262	0.964372	AT1G01650	peptidase	-0.236955	-0.174585	-0.146381	-0.14369	-0.132216	-0.163355	-0.16811	-0.413273
AT1G01730	hypothetical protein	0.198487	0.263129	0.421211	0.441947	-0.00473969	0.0667808	0.155775	0.167831	AT1G02335	GL22 (GERMIN-LIKE PROTEIN SUBFAMILY 2 MEMBER 2 PRECURSOR.); manganese ion binding / metal ion binding / nutrient reservoir	-0.174557	-0.240794	-0.781443	-1.18911	0.28284	0.244316	0.128888	0.0567745	AT1G01680	U-box domain-containing protein	0.627592	1.20159	1.2351	0.774866	0.435434	1.89769	0.710629	0.997009	AT1G01740	protein kinase family protein	-0.258378	-0.409363	-0.620442	-0.691261	-0.342832	-0.418106	-0.326587	-0.293667
AT1G01950	armadillo/beta-catenin repeat family protein / kinesin motor family protein	-0.133165	0.193699	0.0387854	-0.072664	-0.623021	-0.571788	-0.524537	-0.331568	AT1G02360	chitinase, putative	-0.316488	-0.144336	-0.102237	-0.0980993	-0.0865193	0.0565621	0.0579336	0.221789	AT1G01690	hypothetical protein	0.360965	0.344563	0.140573	0.366332	0.229412	0.184536	0.355329	0.355418	AT1G01750	actin-depolymerizing factor, putative	-0.218864	-0.622414	-1.05081	-1.48372	-0.553996	-0.2214	-0.674236	-0.939034
AT1G02020	nitroreductase family protein	0.324389	0.167142	0.0417555	0.321661	0.189867	0.197695	0.0121831	0.493149	AT1G02370	pentatricopeptide (PPR) repeat-containing protein	-0.204099	-0.206437	-0.355929	-0.445224	-0.450417	-0.298286	-0.102849	-0.0513142	AT1G01710	acyl-CoA thioesterase family protein	0.0663965	-0.090011	-0.00278705	-0.0516553	0.0386734	0.00939145	-0.133556	0.0755177	AT1G01820	PEX11C	-0.203216	-0.283382	-0.306462	-0.216531	-0.127749	-0.208068	-0.248985	-0.176407
AT1G02090	FUS5 (FUSCA 5); MAP kinase kinase	-0.0373622	-0.0479214	-0.200948	-0.316485	-0.243481	-0.0221094	-0.0112084	0.0537755	AT1G02570	hypothetical protein	-0.0477811	-0.875933	-1.64105	-2.43667	-0.028572	0.258436	-0.555128	-0.389197	AT1G01720	ATAF1 (Arabidopsis NAC domain containing protein 2); transcription factor	0.460832	0.407204	0.891275	0.981855	-0.142522	0.382277	0.24371	0.592761	AT1G02065	SPL8 (SQUAMOSA PROMOTER BINDING PROTEIN-LIKE 8); DNA binding	-0.271939	-0.418731	-0.487155	-1.06364	-0.674246	-0.614034	-0.774195	-0.890427
AT1G02270	endonuclease/exonuclease/phosphatase family protein / calcium-binding EF hand family protein	0.0865663	0.213476	0.381466	0.484864	-0.0895382	-0.254533	-0.258213	-0.199438	AT1G02610	zinc finger (C3HC4-type RING finger) family protein	-0.1318	-0.132392	-0.101859	-0.305837	0.182557	-0.260069	-0.616724	-1.10616	AT1G01725	hypothetical protein	0.153382	0.166402	0.299385	0.334406	0.41824	0.285865	0.162016	0.348907	AT1G02080	transcriptional regulator-related	-0.671097	-0.241585	-0.695526	-0.856248	-0.587577	-0.565634	-0.377521	-1.10799
AT1G02410	cytochrome c oxidase assembly protein CtaG / Cox11 family	-0.119723	0.0201208	0.0608467	0.194553	-0.29062	-0.300138	-0.0691283	-0.403222	AT1G02640	BXL2 (BETA-XYLOSIDASE 2); hydrolase, hydrolyzing O-glycosyl compounds	-0.619641	-0.486834	-0.822477	-0.953001	0.0381644	-0.916652	-1.105	-2.17584	AT1G01840	hypothetical protein	0.76159	0.731681	0.763706	0.527493	0.49142	0.668239	0.647199	0.734989	AT1G02120	VAD1 (VASCULAR ASSOCIATED DEATH1)	0.0111026	-0.171098	-0.235512	-0.214026	-0.0670524	-0.00832656	-0.018885	0.215716
AT1G02560	CLPP5 (NUCLEAR ENCODED CLP PROTEASE 1); endopeptidase Clp	0.169508	0.0811631	0.102553	0.0728934	0.0419064	0.0170759	-0.047579	0.144535	AT1G02670	DNA repair protein, putative	-0.0734812	-0.118741	-0.565042	-0.463478	0.160644	-0.0505454	0.00570271	0.23437	AT1G02205	CER1 (ECERIFERUM 1)	1.17361	2.18853	3.33448	3.9707	1.74401	1.63742	1.90902	2.4605	AT1G02500	SAM1 (S-adenosylmethionine synthetase 1); methionine adenosyltransferase	-0.181704	-0.112381	-0.147334	-0.147032	-0.145726	-0.060938	-0.0638806	-0.0852095
AT1G02816	hypothetical protein	0.208832	0.212506	0.351021	0.24514	0.311282	0.328941	0.108347	0.314136	AT1G02840	SR1 (splicing factor 2); RNA binding	-0.330796	-0.373813	-0.622544	-0.559467	-0.154901	-0.148353	-0.0387821	-0.165338	AT1G02230	ANAC004 (Arabidopsis NAC domain containing protein 4); transcription factor	1.25514	1.19947	1.67582	2.09937	0.198348	1.48052	1.38531	2.24535	AT1G02520	PGP11 (P-GLYCOPROTEIN 11); ATPase, coupled to transmembrane movement of substances	-0.612245	-0.493165	-0.629524	-0.58398	-0.998421	-0.95341	-1.13533	-1.3253
AT1G03180	hypothetical protein	0.297664	0.301152	0.222762	0.32916	0.0619559	0.0733461	0.13682	0.217649	AT1G02890	AAA-type ATPase family protein	-0.168027	-0.22484	-0.367344	-0.216775	0.13456	-0.0330463	-0.0756532	0.175635	AT1G02380	hypothetical protein	0.309891	0.737574	0.88977	0.590233	0.482392	0.531879	0.637083	0.518247	AT1G02630	equilibrative nucleoside transporter, putative (ENT8)	-0.294919	-0.641111	-0.989516	-1.70923	-0.508958	-1.19138	-1.79116	-2.16816
AT1G03260	hypothetical protein	0.173008	0.150578	0.237927	0.158342	-0.169841	0.0311207	-0.0861898	0.0177179	AT1G02950	ATGSTF4 (GLUTATHIONE S-TRANSFERASE 31); glutathione transferase	-0.16355	-0.359846	-0.824342	-1.32151	0.115616	0.0571966	-0.222953	-0.288753	AT1G02390	ATGPAT2/GPAT2 (GLYCEROL-3-PHOSPHATE ACYLTRANSFERASE 2); acyltransferase	0.164857	0.901795	1.27862	1.15364	0.188595	0.310596	0.460054	0.124401	AT1G02650	DNAJ heat shock N-terminal domain-containing protein	-0.317538	-0.246128	-0.560889	-0.918229	-0.448879	-0.562026	-0.739746	-0.947616
AT1G03330	small nuclear ribonucleoprotein D, putative / snRNP core SM-like protein, putative / U6 snRNA-associated Sm-like protein, putative	0.0699918	0.0903084	0.125045	0.146692	0.0167539	-0.0246324	0.0909236	-0.172431	AT1G03070	glutamate binding /	-0.361414	-0.37724	-0.571365	-1.02424	0.186509	0.319773	0.0985397	0.0786776	AT1G02400	ATGA2OX6/DTA1 (GIBBERELLIN 2-OXIDASE 6); gibberellin 2-beta-dioxygenase	0.644226	0.916657	1.31585	1.36147	0.493599	0.360025	0.564865	0.148396	AT1G02660	lipase class 3 family protein	-0.625557	-0.349132	-0.466171	-0.65781	-0.0638523	-0.454711	-0.831048	-0.962518
AT1G03610	hypothetical protein	0.175528	0.158087	0.290177	0.194185	0.235064	0.339508	0.175728	0.28228	AT1G03080	hypothetical protein	-0.238462	-0.163137	-0.18359	-0.272474	-0.0948096	0.0194786	-0.0352588	-0.0635798	AT1G02405	proline-rich family protein	1.01991	0.740773	1.89588	2.27475	1.01172	1.65356	1.35289	1.85653	AT1G02840	SR1 (splicing factor 2); RNA binding	-0.330796	-0.373813	-0.622544	-0.559467	-0.154901	-0.148353	-0.0387821	-0.165338
AT1G03650	GCN5-related N-acetyltransferase (GNAT) family protein	0.119791	0.141326	0.442018	0.305912	-0.0989601	-0.0440345	0.00781191	-0.0388991	AT1G03090	MCCA (3-methylcrotonyl-CoA carboxylase 1)	-0.252027	-0.469866	-0.503425	-0.797376	0.00562271	0.240451	-0.176703	-0.176211	AT1G02850	glycosyl hydrolase family 1 protein	0.592982	1.13435	2.5005	3.24312	1.17755	1.20022	1.70935	2.3265	AT1G02860	NLA (NITROGEN LIMITATION ADAPTATION); protein binding / zinc ion binding	-0.295472	-0.228218	-0.143266	-0.218615	-0.282646	-0.430689	-0.656126	-0.583322
AT1G03800	ATERF10/ERF10 (ERF domain protein 10); DNA binding / transcription factor/ transcription repressor	0.357155	0.346143	0.63679	0.394207	-0.101337	0.408616	0.709384	0.921422	AT1G03130	PSAD-2 (photosystem I subunit D-2)	-0.331181	-0.258998	-0.278594	-0.283782	-0.0985753	-0.152829	-0.309348	-0.0464998	AT1G02940	ATGSTF5 (Arabidopsis thaliana Glutathione S-transferase (class phi) 5); glutathione transferase	0.7822	1.49317	3.31833	4.24092	0.766802	0.934368	1.51864	2.57107	AT1G02890	AAA-type ATPase family protein	-0.168027	-0.22484	-0.367344	-0.216775	0.13456	-0.0330463	-0.0756532	0.175635
AT1G04070	TOM22-I (translocase of the outer mitochondrial membrane 22-I)	0.107699	0.141231	0.272673	0.203459	-0.0029422	-0.00492521	0.223602	0.141919	AT1G03210	phenazine biosynthesis PhzC/PhzF family protein	-0.089802	-0.179944	-0.315494	-0.534095	-0.355136	-0.0339491	-0.160441	-0.168898	AT1G03030	phosphoribulokinase/uridine kinase family protein	0.273528	0.204218	0.239298	0.201711	0.382649	0.526221	0.30719	0.539401	AT1G02900	RALFL1 (RALF-LIKE 1)	-0.401302	-0.421179	-0.729477	-0.824476	-0.127984	-0.301116	-0.610447	-0.626227
AT1G04200	hypothetical protein	0.0988691	0.22152	0.195107	0.0973661	-0.0838417	0.00633167	0.0202487	0.0658255	AT1G03280	transcription initiation factor IIE (TFIIE) alpha subunit family protein / general transcription factor TFIIE family protein	-0.104796	-0.0983661	-0.113355	-0.267932	-0.231456	-0.107079	-0.0825564	-0.128255	AT1G03120	ATRAB28 (Arabidopsis thaliana responsive to abscisic acid 28)	0.594546	0.657568	0.644128	0.556487	0.336338	0.480654	0.515837	0.769296	AT1G03000	PEX6 (PEROXIN6); ATPase	-0.0885164	-0.120866	-0.202473	-0.419898	-0.34188	-0.116082	-0.1717	-0.288362
AT1G04210	leucine-rich repeat family protein / protein kinase family protein	0.0932081	0.192605	0.137158	0.218993	0.0335436	0.0752577	0.0652924	0.177727	AT1G03300	agenet domain-containing protein	-0.284003	-0.274196	-0.425911	-0.412159	0.405022	0.356723	0.458916	0.481309	AT1G03340	hypothetical protein	0.505198	0.40474	0.683149	0.835057	0.167702	0.443747	0.452552	0.602219	AT1G03010	phototropic-responsive NPH3 family protein	-0.64849	-0.995382	-2.00669	-2.25497	-0.213859	-0.377211	-0.971742	-0.979307
AT1G04260	MPI7 (CAMV MOVEMENT PROTEIN INTERACTING PROTEIN 7)	-0.0523106	0.0630857	0.179907	-0.194867	-0.442501	-0.0236412	-0.0628151	-0.0711987	AT1G03360	ATRRP4; exonuclease	-0.151943	-0.0930141	-0.163317	-0.117048	-0.230011	-0.153908	0.0275344	-0.0369687	AT1G03495	transferase	1.66506	2.28775	3.61108	4.19484	1.95346	2.00506	2.88869	3.94268	AT1G03020	glutaredoxin family protein	-0.700557	-0.964155	-1.40597	-2.65613	-0.204361	-0.565712	-1.17079	-1.83326
AT1G04410	malate dehydrogenase, cytosolic, putative	0.177184	0.134997	0.265073	0.328866	0.0356583	0.160477	0.0406456	0.324713	AT1G03520	glycosyltransferase family 14 protein / core-2/I-branching enzyme family protein	0.223754	0.15693	0.090492	-0.0729552	0.513604	0.385109	0.125496	0.251793	AT1G03610	hypothetical protein	0.175528	0.158087	0.290177	0.194185	0.235064	0.339508	0.175728	0.28228	AT1G03040	basic helix-loop-helix (bHLH) family protein	-0.110765	-0.073146	-0.152716	-0.409953	-0.401027	-0.186004	-0.243091	-0.377842
AT1G04445	zinc finger (C2H2 type) family protein	0.328566	0.432788	0.480614	0.29037	-0.402431	-0.211747	-0.192589	-0.190427	AT1G03530	ATNAF1/NAF1	-0.476633	-0.2002	-0.426312	-0.316203	-0.41329	-0.660818	-0.0413054	-0.601033	AT1G03820	hypothetical protein	1.63459	1.77297	1.687	1.29974	0.876385	0.961352	1.68446	1.80566	AT1G03130	PSAD-2 (photosystem I subunit D-2)	-0.331181	-0.258998	-0.278594	-0.283782	-0.0985753	-0.152829	-0.309348	-0.0464998
AT1G04555	hypothetical protein	0.733616	0.546671	0.95734	0.799957	0.199325	0.582796	0.557987	0.0772533	AT1G03550	secretory carrier membrane protein (SCAMP) family protein	-0.53852	-0.213209	-0.627401	-0.405146	-0.12555	-0.273423	0.271208	-1.01209	AT1G03940	transferase family protein	1.72199	2.34711	3.56486	4.17675	1.88064	2.16227	3.03304	3.99931	AT1G03170	hypothetical protein	-1.26704	-1.06886	-1.67451	-1.84154	-0.948607	-1.9808	-2.00926	-2.46969
AT1G04635	EMB1687 (EMBRYO DEFECTIVE 1687); ribonuclease P	0.1983	0.315812	0.359541	0.333908	-0.0136765	-0.325565	-0.12315	-0.324952	AT1G03580	pseudo	-1.27458	-1.73711	-1.79402	-1.64379	0.581961	-0.552737	-0.564542	-1.09672	AT1G03970	GBF4 (G-box binding factor 4); transcription factor	0.123432	0.285786	0.582221	0.588438	0.151025	0.185948	0.150566	0.291635	AT1G03410	2A6	-0.237233	-0.513791	-0.0695814	-0.929097	-0.366846	-0.49221	-0.448243	-1.01965
AT1G04640	LIP2 (LIPOYLTRANSFERASE 2)	0.180245	0.113069	0.11628	0.101276	0.0486799	0.0287926	-0.0977834	-0.00156412	AT1G03680	ATHM1 (Arabidopsis thioredoxin M-type 1); thiol-disulfide exchange intermediate	-0.122471	-0.146301	-0.201975	-0.381707	0.0348368	-0.0188109	-0.101101	-0.148347	AT1G04290	thioesterase family protein	0.248354	0.230549	0.422916	0.316412	0.257741	0.285954	0.232225	0.157695	AT1G03440	leucine-rich repeat family protein	-0.223801	-0.221932	-0.256222	-0.758982	-0.63604	-0.586051	-0.506528	-0.952768
AT1G04680	pectate lyase family protein	0.223044	0.457748	0.403935	0.226548	-0.137712	-0.291169	0.0628776	-0.565205	AT1G03840	MGP (MAGPIE); nucleic acid binding / protein binding / transcription factor/ zinc ion binding	-0.848585	-0.767277	-1.24073	-0.693543	-0.267325	-0.279477	-0.0927412	-0.12544	AT1G04410	malate dehydrogenase, cytosolic, putative	0.177184	0.134997	0.265073	0.328866	0.0356583	0.160477	0.0406456	0.324713	AT1G03457	RNA-binding protein, putative	-0.546384	-0.141673	-0.434882	-1.32985	-1.02178	-0.359097	-0.321844	-0.95698
AT1G04690	KAB1 (POTASSIUM CHANNEL BETA SUBUNIT); potassium channel	0.0514452	0.151082	0.207441	0.172421	-0.0971861	-0.124732	-0.0740813	-0.265035	AT1G03850	glutaredoxin family protein	-0.588678	-0.811046	-1.00557	-1.41303	-0.606674	-0.308867	-0.861842	-0.823892	AT1G04490	hypothetical protein	0.559285	0.524754	0.795928	0.926214	0.405617	0.588139	0.384721	0.753471	AT1G03670	ankyrin repeat family protein	-0.0389582	-0.0432289	-0.0648506	-0.0693147	-0.0741568	-0.0602424	-0.0923862	-0.0556607
AT1G04750	VAMP7B (VESICLE-ASSOCIATED MEMBRANE PROTEIN 7B)	0.195504	0.137341	0.349078	0.232058	0.0610427	-0.0548427	-0.0514495	-0.192826	AT1G04000	hypothetical protein	-0.219608	-0.0417294	-0.190326	-0.454519	-0.320377	-0.345053	-0.0582772	-0.526105	AT1G04560	AWPM-19-like membrane family protein	2.5243	2.73132	1.96208	5.49082	1.54424	1.85672	3.79305	4.02751	AT1G03740	protein kinase family protein	-0.542897	-0.518786	-0.528938	-0.758867	-0.592378	-0.701955	-0.80777	-0.851583
AT1G04770	male sterility MS5 family protein	0.514854	0.34524	0.208038	0.366868	-0.482842	-0.419595	-0.507113	-0.311626	AT1G04030	hypothetical protein	-0.0647782	-0.141176	-0.337224	-0.761156	0.0341442	0.0512934	-0.074739	-0.0481191	AT1G04570	integral membrane transporter family protein	0.283833	0.152044	0.226313	0.388136	0.378455	0.466213	0.58258	0.66157	AT1G03770	protein binding / zinc ion binding	-0.346118	-0.356926	-0.507903	-0.683283	-0.372889	-0.278484	-0.098171	-0.319447
AT1G04840	pentatricopeptide (PPR) repeat-containing protein	0.12647	0.177079	0.227947	0.268299	0.190315	0.116469	0.258237	0.448626	AT1G04140	transducin family protein / WD-40 repeat family protein	-0.506455	-0.343985	-0.45871	-0.521782	-0.368597	-0.571726	-0.439363	-0.826053	AT1G05100	MAPKKK18 (Mitogen-activated protein kinase kinase kinase 18); kinase	0.386773	0.516089	0.835965	0.397202	0.879217	0.817399	0.740005	0.789764	AT1G03850	glutaredoxin family protein	-0.588678	-0.811046	-1.00557	-1.41303	-0.606674	-0.308867	-0.861842	-0.823892
AT1G04990	zinc finger (CCCH-type) family protein	0.0654418	0.348949	0.693705	0.604336	0.0351641	-0.250261	-0.00697997	-0.388264	AT1G04150	C2 domain-containing protein	-0.17015	-0.248388	-1.04379	-1.36993	-0.229588	0.178498	0.344874	0.0177629	AT1G05230	homeobox-leucine zipper family protein / lipid-binding START domain-containing protein	0.520585	0.44925	0.384579	0.291148	0.179683	0.328948	0.249158	0.74187	AT1G03870	FLA9	-0.362925	-0.276042	-0.49178	-0.498887	-0.0999049	-0.376802	-0.23659	-0.653603
AT1G05140	membrane-associated zinc metalloprotease, putative	0.163816	0.0558004	0.0856078	0.215292	0.145576	0.0386972	0.0793792	0.0213279	AT1G04280	hypothetical protein	-0.184553	-0.394624	-0.398493	-0.606594	-0.442968	0.144297	-0.133136	0.0405238	AT1G05420	ATOFP12/OFP12 (Arabidopsis thaliana ovate family protein 12)	0.0741424	0.192653	0.325007	0.497622	0.454681	0.826618	0.973487	1.10726	AT1G03905	ABC transporter family protein	-0.181785	-0.239231	-0.217702	-0.416568	-0.413353	-0.14573	-0.159938	-0.0823969
AT1G05180	AXR1 (AUXIN RESISTANT 1); small protein activating enzyme	0.0114047	-0.000182588	0.105118	0.100914	0.0613917	-0.0029631	0.069431	0.208256	AT1G04778	hypothetical protein	0.141507	-0.204261	-0.458256	-1.06428	0.139567	0.03699	-0.279449	-0.0901561	AT1G05710	ethylene-responsive protein, putative	0.470423	0.752911	1.01892	1.14287	0.549172	0.476822	0.775718	0.81412	AT1G03980	ATPCS2 (PHYTOCHELATIN SYNTHASE 2); glutathione gamma-glutamylcysteinyltransferase	-0.136792	-0.271669	-0.677929	-0.983908	-0.817365	-0.491078	-0.490304	-0.705644
AT1G05650	polygalacturonase, putative / pectinase, putative	0.239769	0.40257	0.428514	0.935163	0.187164	-0.380003	-0.231733	-1.25239	AT1G04950	TAFII59 (TBP-ASSOCIATED FACTOR 6); transcription initiation factor	0.0150987	-0.268789	-0.279808	-0.475417	-0.0577033	-0.130632	-0.172654	-0.153833	AT1G05720	selenoprotein family protein	0.100685	0.102309	0.27615	0.367798	0.15208	0.109047	0.254316	0.079426	AT1G04080	PRP39; binding	0.0720051	0.305497	-0.554623	-0.457246	-0.585894	-0.168665	-0.359909	0.348202
AT1G05690	BT3 (BTB and TAZ domain protein 3); protein binding / transcription regulator	0.314898	0.158008	0.34685	0.594699	0.207361	0.190356	0.0442668	0.650842	AT1G04970	lipid-binding serum glycoprotein family protein	-0.149348	-0.219596	-0.132362	-0.162904	0.109476	-0.424148	-0.28205	-0.142416	AT1G05870	hypothetical protein	0.515899	0.409983	0.631517	0.8418	0.425436	0.568099	0.408705	0.716233	AT1G04140	transducin family protein / WD-40 repeat family protein	-0.506455	-0.343985	-0.45871	-0.521782	-0.368597	-0.571726	-0.439363	-0.826053
AT1G05730	hypothetical protein	0.215727	0.186024	0.361982	0.323172	-0.0589928	0.017668	0.24104	0.212252	AT1G04985	hypothetical protein	-0.234459	-0.168323	-0.136604	-0.350857	-0.166903	-0.0887986	-0.0171795	-0.322583	AT1G06080	ADS1 (DELTA 9 DESATURASE 1); oxidoreductase	0.670799	0.776301	0.501102	0.275069	0.478525	0.808693	0.774629	1.02803	AT1G04180	flavin-containing monooxygenase family protein / FMO family protein	-0.352766	-0.291835	-0.805174	-1.36233	-0.453538	-0.834036	-0.837126	-1.73
AT1G05750	PDE247 (PIGMENT DEFECTIVE 247)	0.166999	0.0788903	0.181627	0.255083	-0.0512517	0.0287195	0.0406055	0.0958088	AT1G05030	hexose transporter, putative	-0.0591697	-0.189336	-0.264338	-0.50375	-0.158525	0.0677753	0.0870684	-0.15299	AT1G06100	fatty acid desaturase family protein	0.630817	0.650469	0.655823	0.47497	0.598887	0.896669	0.507214	0.998111	AT1G04220	beta-ketoacyl-CoA synthase, putative	-0.503202	-0.537536	-0.178437	-0.373896	-0.503968	-0.291551	-0.781142	-0.771906
AT1G05780	hypothetical protein	0.223479	0.298997	0.587316	0.520211	0.111293	0.181487	0.278435	-0.0249201	AT1G05135	pseudo	-0.189388	-0.35674	-0.133649	-0.0312861	-0.420295	-0.165177	-0.256453	-0.041763	AT1G06350	fatty acid desaturase family protein	0.766879	1.11568	2.4274	3.22651	1.9222	1.63032	1.83353	2.44546	AT1G04250	AXR3 (AUXIN RESISTANT 3); transcription factor	-0.306221	-0.483138	-0.558975	-0.794888	-0.385443	-0.188755	-0.485395	-0.28593
AT1G06010	hypothetical protein	0.128562	0.118089	0.207883	0.156471	0.0859937	0.0937727	0.201808	0.0355043	AT1G05160	CYP88A3 (ENT-KAURENOIC ACID HYDROXYLASE 1); oxygen binding	-0.233264	-0.0763845	-0.105807	-0.298859	-0.0461888	-0.151142	0.172587	-0.45132	AT1G06475	hypothetical protein	0.260539	0.557034	0.572434	0.629028	0.747954	0.513406	0.715885	0.59891	AT1G04530	binding	-0.193894	-0.436996	-0.531853	-0.50438	-0.33662	-0.456777	-0.593188	-0.501429
AT1G06270	pentatricopeptide (PPR) repeat-containing protein	0.200399	0.293898	0.344482	0.484802	0.112772	0.0448072	0.287831	0.237229	AT1G05190	EMB2394 (EMBRYO DEFECTIVE 2394); structural constituent of ribosome	-0.0663455	-0.139001	-0.247499	-0.331915	-0.194453	-0.15859	-0.179151	-0.33169	AT1G07010	calcineurin-like phosphoesterase family protein	0.521454	0.39341	0.936572	1.44971	0.8446	0.603219	0.528506	1.02238	AT1G05020	epsin N-terminal homology (ENTH) domain-containing protein / clathrin assembly protein-related	-0.29982	-0.402583	-0.687981	-0.874635	-0.173519	-0.1857	-0.524122	-0.488493
AT1G06360	fatty acid desaturase family protein	0.227198	0.821433	1.06371	1.48464	0.78072	-0.0453958	0.752798	0.517755	AT1G05220	hypothetical protein	0.019003	-0.0192015	-0.315625	-0.731144	-0.270073	0.216326	0.079998	-0.0905307	AT1G07080	gamma interferon responsive lysosomal thiol reductase family protein / GILT family protein	0.492764	0.571612	0.848124	1.13682	0.687712	0.521316	0.443399	0.937937	AT1G05190	EMB2394 (EMBRYO DEFECTIVE 2394); structural constituent of ribosome	-0.0663455	-0.139001	-0.247499	-0.331915	-0.194453	-0.15859	-0.179151	-0.33169
AT1G06470	phosphate translocator-related	0.0790464	0.0838638	0.10554	0.380217	0.0966662	-0.224801	-0.156338	-0.0624792	AT1G05250	peroxidase, putative	-0.580081	-0.718353	-1.6757	-1.99556	0.0220198	-0.669285	-1.01332	-1.49084	AT1G07175	hypothetical protein	0.411084	0.448778	0.355627	0.747308	0.47412	0.286351	0.428103	0.0820978	AT1G05385	photosystem II 11 kDa protein-related	-0.0582739	-0.409855	-0.733418	-0.818605	-0.285458	-0.421769	-0.518841	-0.639611
AT1G06580	pentatricopeptide (PPR) repeat-containing protein	0.000351269	0.0582767	0.0254065	-0.0738806	-0.128103	-0.121651	-0.163607	0.128885	AT1G05260	RCI3 (RARE COLD INDUCIBLE GENE 3); peroxidase	-0.206504	-0.310539	-0.229208	-0.195985	-0.264387	0.209259	0.0516899	0.34767	AT1G07200	ATP-dependent Clp protease ClpB protein-related	0.281926	0.174805	0.0471189	0.203206	0.382336	0.421448	0.118	0.716223	AT1G05560	UGT1 (UDP-glucosyl transferase 75B1); UDP-glycosyltransferase/ transferase, transferring glycosyl groups	-0.455119	-0.665778	-0.59552	-0.332918	-0.71233	-0.833509	-0.768654	-0.321077
AT1G07020	hypothetical protein	0.188536	0.280563	0.30892	0.273559	0.0813866	0.18894	0.28421	0.289325	AT1G05300	ZIP5 (ZINC TRANSPORTER 5 PRECURSOR); cation transmembrane transporter	-0.411005	-0.759757	-1.40142	-1.02069	0.124639	-0.81972	-0.956438	-1.25404	AT1G07230	phosphoesterase family protein	0.221563	0.32147	0.472078	0.500135	0.300678	0.286193	0.231379	0.467055	AT1G05575	hypothetical protein	-0.49976	-0.707133	-0.799355	-1.16874	-0.543329	-0.373197	-0.52601	-0.720561
AT1G07080	gamma interferon responsive lysosomal thiol reductase family protein / GILT family protein	0.492764	0.571612	0.848124	1.13682	0.687712	0.521316	0.443399	0.937937	AT1G05320	hypothetical protein	-0.0604994	-0.241475	-0.334209	-0.519679	-0.131855	0.00491109	-0.299043	-0.213077	AT1G07380	ceramidase family protein	0.176866	0.193598	0.167741	0.188473	0.189147	0.298581	0.272414	0.517541	AT1G05680	UDP-glucoronosyl/UDP-glucosyl transferase family protein	-2.02271	-1.86425	-1.07577	-0.269258	-1.25218	-1.15259	-1.13703	-0.391272
AT1G07210	30S ribosomal protein S18 family	0.0848823	0.141826	0.245252	0.384468	-0.047022	-0.0902694	0.0876042	0.110334	AT1G05410	hypothetical protein	-0.145392	-0.134593	-0.0894034	-0.101941	-0.103504	-0.0838857	-0.077351	-0.124993	AT1G07400	17 kDa class I heat shock protein (HSP17-CI)	0.485558	0.67001	0.637859	1.07694	0.262083	0.711688	0.598139	1.26854	AT1G05805	basic helix-loop-helix (bHLH) family protein	-0.337273	-0.473424	-0.601412	-0.792764	-0.280205	-0.552268	-0.747408	-0.794097
AT1G07220	hypothetical protein	0.23931	0.447894	0.586906	0.566852	0.17416	0.100241	0.152955	0.366082	AT1G05630	5PTASE13/AT5PTASE13; inositol or phosphatidylinositol phosphatase	0.0745899	-0.0266729	-0.147358	-0.536437	-0.0609868	0.0600128	-0.116364	-0.179471	AT1G07430	protein phosphatase 2C, putative / PP2C, putative	3.38877	3.16608	3.60053	4.31167	3.73796	4.11394	4.04444	4.46187	AT1G05810	ARA/Ara-1/AtRABA5e/AtRab11D (Arabidopsis Rab GTPase homolog A5e); GTP binding	-0.275718	-0.506269	-0.498438	-0.864694	-0.440684	-0.34788	-0.702925	-1.15673
AT1G07350	transformer serine/arginine-rich ribonucleoprotein, putative	0.305442	0.236438	0.254704	0.100892	-0.153634	0.336733	0.367299	0.501076	AT1G05890	zinc finger protein-related	-0.19716	-0.111455	-0.123743	-0.187777	-0.156011	0.0276744	-0.0132401	-0.149212	AT1G07470	transcription factor IIA large subunit, putative / TFIIA large subunit, putative	0.407835	0.300608	0.372162	0.33203	0.232081	0.421585	0.38987	0.535247	AT1G05820	hypothetical protein	-0.357688	-0.484705	-0.444407	-0.96264	-0.24384	-0.486917	-0.571381	-0.918416
AT1G07600	MT1A (METALLOTHIONEIN 1A)	0.177751	0.322714	0.32483	0.455438	0.150821	0.113452	0.0695492	0.0851329	AT1G06000	UDP-glucoronosyl/UDP-glucosyl transferase family protein	-0.555076	-0.323885	-0.288758	-0.199805	-0.284984	-0.311512	-0.234886	-0.00968588	AT1G07610	MT1C (metallothionein 1C)	0.679643	0.9295	0.95687	1.08963	0.709393	0.561718	0.568729	0.572824	AT1G05960	binding	-0.457965	-0.366785	-0.467821	-0.69638	-0.197173	-0.355506	-0.320011	-0.745542
AT1G07650	leucine-rich repeat transmembrane protein kinase, putative	-0.152612	-0.0189929	-0.182921	-0.56963	-0.474078	-0.1559	-0.356389	-0.445212	AT1G06150	transcription factor	-0.157612	-0.269242	-0.444732	-0.460748	0.0833646	0.187062	0.177153	0.217437	AT1G07660	histone H4	0.216054	0.192291	0.123366	0.304604	0.376096	0.37581	0.513158	0.655317	AT1G05990	calcium-binding protein, putative	-0.521176	-1.07445	-1.64083	-2.36785	-0.672174	-0.200191	-1.33967	-1.21922
AT1G07700	thioredoxin family protein	0.229052	0.0527776	0.135629	0.0756103	-0.059284	0.0099337	-0.142024	-0.103774	AT1G06160	ethylene-responsive factor, putative	-0.525674	-0.771465	-1.50348	-1.56337	-0.206347	-0.343075	-0.351086	0.165679	AT1G07780	PAI1 (PHOSPHORIBOSYLANTHRANILATE ISOMERASE 1); phosphoribosylanthranilate isomerase	0.202291	0.0884668	0.273436	0.352881	0.27298	0.34508	0.488753	0.681693	AT1G06040	STO (SALT TOLERANCE); transcription factor/ zinc ion binding	-0.267834	-0.357729	-0.292755	-0.369083	-0.835086	-0.910246	-0.980095	-0.958132
AT1G07725	ATEXO70H6 (exocyst subunit EXO70 family protein H6); protein binding	0.812669	1.20341	1.44518	0.959442	0.783006	1.81949	1.27984	1.56942	AT1G06230	GTE4 (GLOBAL TRANSCRIPTION FACTOR GROUP E 4); DNA binding	-0.243969	-0.176323	-0.427011	-0.482054	-0.438736	-0.211125	-0.0921419	-0.201011	AT1G07790	HTB1; DNA binding	0.293014	0.31449	0.175048	0.192269	0.17266	0.267045	0.418868	0.403039	AT1G06090	fatty acid desaturase family protein	-0.54259	-0.490498	-0.923851	-0.943824	-0.707978	-0.291828	-0.446763	-0.621121
AT1G07870	protein kinase family protein	0.225242	0.497547	0.737946	0.501898	0.153038	0.418662	0.331592	0.369634	AT1G06290	ACX3 (ACYL-COA OXIDASE 3); acyl-CoA oxidase	-0.0475272	-0.174828	-0.203128	-0.473928	-0.295021	-0.0017355	-0.252942	-0.16439	AT1G07820	histone H4	0.315188	0.271938	0.209359	0.230556	0.232824	0.246733	0.487855	0.503135	AT1G06137	hypothetical protein	-0.771169	-0.915321	-0.842847	-0.931748	-0.919172	-0.982459	-0.860361	-0.893734
AT1G07940	elongation factor 1-alpha / EF-1-alpha	0.810386	1.22943	-0.0367873	0.574216	0.63877	0.325375	0.511801	0.713081	AT1G06550	enoyl-CoA hydratase/isomerase family protein	-0.470195	-0.340788	-0.330557	-0.389627	-0.0212014	-0.0828971	-0.0353457	-0.0849272	AT1G07870	protein kinase family protein	0.225242	0.497547	0.737946	0.501898	0.153038	0.418662	0.331592	0.369634	AT1G06230	GTE4 (GLOBAL TRANSCRIPTION FACTOR GROUP E 4); DNA binding	-0.243969	-0.176323	-0.427011	-0.482054	-0.438736	-0.211125	-0.0921419	-0.201011
AT1G08090	ATNRT2:1 (Arabidopsis thaliana high affinity nitrate transporter 2); nitrate transmembrane transporter	0.564828	0.682597	0.790253	0.821431	0.20751	0.112147	-0.0034484	-0.0366063	AT1G06670	NIH (NUCLEAR DEIH-BOXHELICASE)	-0.0201198	-0.0995784	-0.358449	-0.356514	-0.160401	-0.017716	-0.00719534	0.0808648	AT1G07900	LBD1 (LOB DOMAIN-CONTAINING PROTEIN 1)	0.746508	0.876695	1.05381	0.896892	0.875682	0.71252	0.354732	0.589916	AT1G06410	ATTPS7 (Arabidopsis thaliana trehalose-phosphatase/synthase 7); transferase, transferring glycosyl groups / trehalose-phosphatase	-0.500853	-0.219813	-0.319253	-0.523476	-0.521897	-0.705271	-0.503888	-1.2209
AT1G08100	ATNRT2 (Arabidopsis thaliana high-affinity nitrate transporter 2); nitrate transmembrane transporter	2.32166	2.35411	3.11302	2.7792	-0.711601	1.47311	0.144867	1.78383	AT1G06680	PSBP-1 (OXYGEN-EVOLVING ENHANCER PROTEIN 2); poly(U) binding	0.0413546	0.0812218	-0.0150233	-0.0864556	-0.0296291	0.102984	0.0270224	0.0299629	AT1G07985	Expressed protein	0.590675	0.633297	1.1642	1.22409	1.31364	1.64452	1.96231	2.22373	AT1G06540	hypothetical protein	-1.55042	-1.04455	-1.1665	-0.879172	-0.272736	-0.87374	-0.253102	-0.7611
AT1G08120	ATP binding / protein kinase	0.0407542	0.0969922	0.183897	0.286903	-0.24568	-0.0522351	-0.0786027	-0.0744157	AT1G06690	aldo/keto reductase family protein	-0.118419	-0.171455	-0.280825	-0.294356	0.0698175	0.211261	0.00824941	0.243667	AT1G08040	hypothetical protein	0.199032	0.163215	0.247533	0.183909	0.234876	0.272219	0.305115	0.333258	AT1G06800	lipase class 3 family protein	-0.695585	-0.407757	-0.208659	-0.403719	-0.653006	-0.702256	-0.322574	-0.832575
AT1G08125	Expressed protein	0.0176903	0.00981752	-0.087937	-0.20038	-0.123894	0.0326878	0.140794	0.0381229	AT1G06810	hypothetical protein	-0.207222	-0.229435	-0.313273	-0.265538	-0.0203674	-0.193732	-0.0436942	-0.0372451	AT1G08070	pentatricopeptide (PPR) repeat-containing protein	0.208454	0.166712	0.275269	0.403374	0.129664	0.142622	0.123478	0.557641	AT1G06820	CRTISO (CAROTENOID ISOMERASE); carotenoid isomerase	-0.144513	-0.0994273	-0.280217	-0.336879	-0.230226	-0.336469	-0.318192	-0.563749
AT1G08165	hypothetical protein	0.662714	0.555708	0.509562	0.548009	0.152993	0.274407	0.417018	-0.0132436	AT1G06900	metalloendopeptidase	-0.113145	-0.0744861	-0.216617	-0.139379	-0.125765	-0.102255	-0.0170114	-0.142143	AT1G08080	carbonic anhydrase family protein	2.45338	2.15831	3.40825	3.05671	3.25033	2.72603	2.58569	3.25697	AT1G06830	glutaredoxin family protein	-0.580831	-1.19575	-1.17799	-1.11817	-2.08753	-1.66449	-2.31519	-2.32242
AT1G08440	hypothetical protein	1.16381	0.795446	1.16924	1.3051	0.63238	1.20332	0.825137	0.692428	AT1G07250	UDP-glucoronosyl/UDP-glucosyl transferase family protein	-0.0746994	-0.199953	-0.200316	-0.295571	0.0341604	-0.0253594	-0.0384062	-0.0199158	AT1G08190	vacuolar assembly protein, putative (VPS41)	0.190637	0.130738	0.0673577	0.187647	0.22584	0.191739	0.169631	0.334898	AT1G06840	leucine-rich repeat transmembrane protein kinase, putative	-0.351399	-0.428156	-0.54272	-0.694563	-0.479346	-0.403234	-0.442873	-0.435285
AT1G08465	YAB2 (YABBY 2); transcription factor	0.359405	0.303257	0.367775	0.268317	0.276848	0.301257	0.101292	0.283201	AT1G07300	josephin protein-related	-0.177455	-0.212864	-0.461243	-0.820417	-0.439183	-0.00230361	-0.133852	0.0179116	AT1G08220	hypothetical protein	0.20356	0.192751	0.184932	0.167153	-0.153381	-0.0309806	0.18464	0.224991	AT1G06890	transporter-related	-0.292894	-0.298286	-0.265824	-0.227231	-0.393912	-0.506331	-0.373503	-0.789632
AT1G08530	hypothetical protein	0.428264	0.295158	0.456524	0.456822	0.41043	0.375736	0.235791	0.444692	AT1G07520	scarecrow transcription factor family protein	-0.193563	-0.251339	-0.333754	-0.494753	-0.374114	-0.202684	-0.256227	-0.400467	AT1G08400	chromosome structural maintenance protein-related	0.17256	0.259734	0.297742	0.483093	0.249755	0.10973	0.231106	0.462913	AT1G06900	metalloendopeptidase	-0.113145	-0.0744861	-0.216617	-0.139379	-0.125765	-0.102255	-0.0170114	-0.142143
AT1G08570	thioredoxin family protein	0.455714	0.254969	0.395414	0.311928	0.0694828	0.320027	0.155524	0.127367	AT1G07840	leucine zipper factor-related	-0.0962982	-0.101083	-0.235643	-0.133591	-0.0591712	-0.0484063	0.0670292	0.149625	AT1G08430	ALMT1/ATALMT1 (AL-ACTIVATED MALATE TRANSPORTER 1); malate transmembrane transporter/	0.939324	1.35591	1.39192	1.45848	0.894879	2.50412	2.95693	4.86684	AT1G06930	hypothetical protein	-1.59408	-1.21601	-2.16873	-2.24228	-0.691674	-1.2241	-0.428622	-2.45236
AT1G08650	PPCK1 (PHOSPHOENOLPYRUVATE CARBOXYLASE KINASE); kinase	0.346769	0.441559	0.566935	0.974025	-0.679067	-0.405281	-0.140122	-0.60855	AT1G07990	SIT4 phosphatase-associated family protein	-0.107691	-0.0764309	-0.153727	-0.146672	-0.159931	0.0483984	0.0356409	-0.00152285	AT1G08465	YAB2 (YABBY 2); transcription factor	0.359405	0.303257	0.367775	0.268317	0.276848	0.301257	0.101292	0.283201	AT1G07110	F2KP (FRUCTOSE-2,6-BISPHOSPHATASE); fructose-2,6-bisphosphate 2-phosphatase	-0.0821749	-0.376868	-0.753689	-0.799709	-0.201465	-0.0734792	-0.27271	-0.166688
AT1G08670	epsin N-terminal homology (ENTH) domain-containing protein / clathrin assembly protein-related	0.1025	0.0672873	0.460778	0.584689	-0.174213	0.211476	-0.189787	0.0412481	AT1G08060	MOM (MAINTENANCE OF METHYLATION)	-0.103846	-0.155909	-0.338003	-0.613981	-0.297763	-0.118533	-0.207251	-0.268163	AT1G08530	hypothetical protein	0.428264	0.295158	0.456524	0.456822	0.41043	0.375736	0.235791	0.444692	AT1G07180	ATNDI1/NDA1 (ALTERNATIVE NAD(P)H DEHYDROGENASE 1); NADH dehydrogenase	-0.328741	-0.70124	-0.89693	-1.11951	-0.302832	-0.859704	-0.973797	-0.725359
AT1G08720	EDR1 (ENHANCED DISEASE RESISTANCE 1); kinase/ protein serine/threonine/tyrosine kinase	0.173032	0.272792	0.331715	0.334983	0.0652826	0.168647	-0.149274	0.184889	AT1G08160	harpin-induced protein-related / HIN1-related / harpin-responsive protein-related	-0.170548	-0.0774998	-0.552182	-0.667623	0.138665	0.0197325	-0.149235	-0.153844	AT1G08640	heat shock protein binding	0.0788177	0.0580208	0.124618	0.296901	0.329032	0.173437	0.267783	0.312625	AT1G07240	UDP-glucoronosyl/UDP-glucosyl transferase family protein	-0.377441	-0.350489	-0.276654	-0.328681	-0.373793	-0.543168	-0.576201	-0.539134
AT1G08770	prenylated rab acceptor (PRA1) family protein	0.13473	0.148846	0.439223	0.472793	0.0265047	-0.0158256	-0.114007	-0.11336	AT1G08270	hypothetical protein	-0.0749664	-0.186871	-0.187003	-0.212459	0.022109	-0.0850914	-0.392368	0.0237101	AT1G08830	CSD1 (COPPER/ZINC SUPEROXIDE DISMUTASE 1); copper, zinc superoxide dismutase	0.219527	0.23047	0.430972	0.523637	0.188453	0.125855	0.238384	0.395902	AT1G07260	UDP-glucoronosyl/UDP-glucosyl transferase family protein	-0.300778	-0.228654	-0.818657	-1.29582	-0.430158	-0.618191	-0.668883	-0.664644
AT1G08780	ABI3 (ABI3-INTERACTING PROTEIN 3); unfolded protein binding	0.159126	0.147849	0.157794	0.167071	-0.029151	-0.0338164	0.138273	-0.0859166	AT1G08320	bZIP family transcription factor	-0.0012139	-0.262689	-0.200983	-0.665089	-0.408125	0.124276	-0.515923	0.076627	AT1G08890	sugar transporter family protein	0.174953	0.259407	0.544254	0.673602	0.461664	0.193316	0.384514	-0.0212682	AT1G07310	C2 domain-containing protein	-0.0733146	-0.0761437	-0.0549117	-0.287631	-0.142865	-0.198511	-0.3385	-0.296326
AT1G08830	CSD1 (COPPER/ZINC SUPEROXIDE DISMUTASE 1); copper, zinc superoxide dismutase	0.219527	0.23047	0.430972	0.523637	0.188453	0.125855	0.238384	0.395902	AT1G08360	60S ribosomal protein L10A (RPL10aA)	-0.126138	-0.0731878	-0.194245	-0.213859	-0.203106	-0.145719	-0.0165005	-0.170508	AT1G08980	ATAMI1 (AMIDASE-LIKE PROTEIN 1); amidase	0.132577	0.254447	0.346414	0.106508	0.0100007	0.0182484	-0.146402	-0.272205	AT1G07360	zinc finger (CCCH-type) family protein / RNA recognition motif (RRM)-containing protein	-0.330124	-0.339254	-0.459327	-0.822037	-0.815077	-0.534308	-0.621108	-0.525647
AT1G08860	BON3 (BONZAI 3)	0.41475	0.805644	1.0516	0.494279	-0.00257382	0.411251	0.165283	0.0553641	AT1G08370	DCP1 (DECAPPING 1); m7G(5')pppN diphosphatase/ protein homodimerization	-0.0812734	-0.0632026	-0.0385823	-0.17209	-0.296404	-0.136886	-0.283275	-0.204769	AT1G09100	RPT5B (26S PROTEASOME AAA-ATPASE SUBUNIT RPT5B); ATPase/ calmodulin binding	0.256211	0.226151	0.374041	0.351491	0.232039	0.207235	0.133092	0.31811	AT1G07420	SMO2-2 (sterol 4-alpha-methyl-oxidase 2); C-4 methylsterol oxidase	-0.443456	-0.313727	-0.222721	-0.254157	-0.32112	-0.562921	-0.592014	-0.865288
AT1G08880	G-H2AX/GAMMA-H2AX/H2AXA/HTA5; DNA binding	0.140395	0.205071	0.537084	0.661808	-0.0507504	-0.219633	-0.128127	-0.458701	AT1G08600	ATRX/CHR20; ATP binding / DNA binding / helicase	-0.0153749	0.22932	-0.0569466	-0.15734	-0.330219	-0.206798	0.0371499	-0.252443	AT1G09180	ATSAR1/ATSARA1A (ARABIDOPSIS THALIANA SECRETION-ASSOCIATED RAS SUPER FAMILY 1); GTP binding	0.695705	0.591696	1.06734	2.1133	1.80468	1.25888	1.12675	1.74362	AT1G07520	scarecrow transcription factor family protein	-0.193563	-0.251339	-0.333754	-0.494753	-0.374114	-0.202684	-0.256227	-0.400467
AT1G08890	sugar transporter family protein	0.174953	0.259407	0.544254	0.673602	0.461664	0.193316	0.384514	-0.0212682	AT1G08660	glycosyl transferase family 29 protein / sialyltransferase family protein	-0.191364	-0.111684	-0.243761	-0.131221	-0.093291	-0.193843	0.0299137	-0.151216	AT1G09200	histone H3	0.246165	0.290597	0.204657	-0.120355	-0.106178	0.0916475	0.231677	-0.0544609	AT1G07640	OBP2 (OBF BINDING PROTEIN 2); DNA binding	-0.431936	-0.396632	-0.764257	-0.914399	-0.248254	-0.464732	-0.555488	-0.93565
AT1G08980	ATAMI1 (AMIDASE-LIKE PROTEIN 1); amidase	0.132577	0.254447	0.346414	0.106508	0.0100007	0.0182484	-0.146402	-0.272205	AT1G09230	RNA recognition motif (RRM)-containing protein	0.0228158	-0.123726	-0.173339	0.0736441	0.178217	0.0963663	0.139559	0.383716	AT1G09310	hypothetical protein	0.474645	0.347675	0.858307	0.874628	0.353506	0.666157	0.460389	0.80913	AT1G07680	hypothetical protein	-2.08878	-2.46322	-4.26549	-4.44694	-3.01959	-4.16678	-4.45607	-4.4572
AT1G09060	transcription factor jumonji (jmjC) domain-containing protein	-0.00941125	0.363409	0.267928	0.0887335	-0.124794	0.13425	-0.00272104	0.291657	AT1G09280	hypothetical protein	-0.186776	-0.156243	-0.249035	-0.529252	-0.261737	-0.0957011	-0.056784	-0.148904	AT1G09470	hypothetical protein	0.220775	0.318701	0.238593	0.0614409	-0.0264936	0.0887008	0.420061	0.178831	AT1G07710	ankyrin repeat family protein	-0.510898	-0.546652	-0.900653	-1.42915	-0.798423	-0.952577	-0.97895	-1.22014
AT1G09070	(AT)SRC2/SRC2 (SOYBEAN GENE REGULATED BY COLD-2); protein binding	0.545288	1.06543	1.3609	1.46198	-0.0939446	-0.228484	-0.30346	-0.33021	AT1G09420	G6PD4 (GLUCOSE-6-PHOSPHATE DEHYDROGENASE 4); glucose-6-phosphate dehydrogenase	-0.488472	-0.694821	-1.36776	-1.49322	0.327152	0.633265	0.857619	1.01648	AT1G09530	PAP3/PIF3/POC1 (PHYTOCHROME INTERACTING FACTOR 3); DNA binding / protein binding / transcription factor/ transcription regulator	0.330245	0.103838	0.179075	-0.0400804	0.77506	1.09537	0.455972	1.51326	AT1G07770	RPS15A (RIBOSOMAL PROTEIN S15A); structural constituent of ribosome	-0.0867353	-0.108005	-0.150571	-0.281618	-0.185332	-0.202069	-0.0719295	-0.468872
AT1G09190	hypothetical protein	0.243395	0.274083	0.286443	0.240431	-0.128637	0.116998	0.299608	0.495717	AT1G09460	glucan endo-1,3-beta-glucosidase-related	-0.630424	-0.78832	-0.848693	-1.14783	-0.585898	-0.179609	-0.0921417	-0.151862	AT1G09680	pentatricopeptide (PPR) repeat-containing protein	0.257568	0.316884	0.41553	0.560576	0.222913	0.18122	0.198968	0.480862	AT1G08190	vacuolar assembly protein, putative (VPS41)	0.190637	0.130738	0.0673577	0.187647	0.22584	0.191739	0.169631	0.334898
AT1G09310	hypothetical protein	0.474645	0.347675	0.858307	0.874628	0.353506	0.666157	0.460389	0.80913	AT1G09490	cinnamyl-alcohol dehydrogenase family / CAD family	-0.369535	-0.365876	-0.296419	-0.327629	0.075794	-0.17503	-0.352672	-0.402203	AT1G09795	ATATP-PRT2 (ATP PHOSPHORIBOSYL TRANSFERASE 2); ATP phosphoribosyltransferase	0.244359	0.202415	0.0821707	0.223089	0.484237	0.360726	0.400518	0.64609	AT1G08420	kelch repeat-containing protein / serine/threonine phosphoesterase family protein	-0.93626	-0.391346	-0.403935	-0.673831	-0.652448	-1.08211	-0.358041	-1.10659
AT1G09330	hypothetical protein	0.115887	0.147152	0.299859	0.615604	0.203233	0.0156608	0.0991718	0.0466807	AT1G09620	ATP binding / aminoacyl-tRNA ligase	-0.0627363	-0.0759474	-0.309076	-0.102989	-0.104511	-0.124382	-0.000506	0.017482	AT1G09850	XBCP3 (XYLEM BARK CYSTEINE PEPTIDASE 3); cysteine-type peptidase	0.193519	0.167818	0.395315	0.315103	0.118489	0.317178	0.0708962	0.383089	AT1G08510	FATB (FATTY ACYL-ACP THIOESTERASES B); acyl carrier/ acyl-ACP thioesterase	-0.309686	-0.0779336	-0.199329	-0.420477	-0.595491	-0.737084	-0.495705	-1.08192
AT1G09350	ATGOLS3 (ARABIDOPSIS THALIANA GALACTINOL SYNTHASE 3); transferase, transferring glycosyl groups / transferase, transferring hexosyl groups	1.64794	0.20468	0.85675	1.41598	-0.777147	-0.399071	-1.17976	-0.703854	AT1G09640	elongation factor 1B-gamma, putative / eEF-1B gamma, putative	-0.135501	-0.052498	-0.0290116	0.1122	-0.0385635	-0.237951	0.059495	-0.108061	AT1G09910	lyase	0.275246	0.125699	0.149792	0.153247	0.261548	0.320509	0.260254	0.551812	AT1G08680	ZIGA4 (ARF GAP-LIKE ZINC FINGER-CONTAINING PROTEIN ZIGA4); DNA binding	-0.142127	-0.127202	-0.147048	-0.405143	-0.25942	-0.230838	-0.397861	-0.445751
AT1G09470	hypothetical protein	0.220775	0.318701	0.238593	0.0614409	-0.0264936	0.0887008	0.420061	0.178831	AT1G09710	DNA binding	-0.146603	-0.438904	-0.786266	-0.873639	0.194103	0.28024	0.371569	0.48473	AT1G10230	ASK18 (ARABIDOPSIS SKP1-LIKE 18); protein binding / ubiquitin-protein ligase	0.298921	0.430359	0.601173	0.542268	0.175383	0.172577	0.577075	0.168264	AT1G08800	hypothetical protein	-0.233262	-0.339602	-0.454652	-0.659257	-0.360919	-0.356772	-0.643865	-0.6882
AT1G09575	hypothetical protein	0.209146	0.284864	0.370858	0.40363	0.0452675	0.00103399	-0.279464	-0.253272	AT1G09730	Ulp1 protease family protein	-0.123249	-0.0825487	-0.229385	-0.548635	-0.339162	-0.0491374	-0.0411063	-0.0972282	AT1G10340	ankyrin repeat family protein	0.589387	0.746461	0.744997	0.810164	0.498984	1.35151	0.588237	1.21958	AT1G08930	ERD6 (EARLY RESPONSE TO DEHYDRATION 6); carbohydrate transmembrane transporter/ sugar:hydrogen ion symporter	-0.77375	-0.579704	-0.640318	-0.649332	-0.336575	-0.723476	-0.710004	-0.73647
AT1G09580	emp24/gp25L/p24 family protein	0.223977	0.178837	0.241903	0.220686	0.0241402	-0.0336231	0.163231	-0.0790577	AT1G09760	U2A' (U2 small nuclear ribonucleoprotein A); protein binding	-0.0623925	-0.104099	-0.206067	-0.321547	-0.149744	-0.0580294	-0.000211685	0.0158359	AT1G10588	hypothetical protein	1.09356	1.40012	1.12428	2.10048	2.34404	2.29151	1.64777	2.19853	AT1G08940	phosphoglycerate/bisphosphoglycerate mutase family protein	-0.394192	-0.382892	-0.250025	-0.423799	-0.591053	-0.488893	-0.568755	-0.4741
AT1G09645	hypothetical protein	0.0952159	0.122833	0.296869	0.419199	0.101124	-0.0301741	-0.126817	-0.0629434	AT1G09770	ATCDC5 (ARABIDOPSIS THALIANA HOMOLOG OF CDC5); DNA binding / transcription factor	-0.2866	-0.250331	-0.504236	-0.597472	-0.211997	-0.0610175	-0.071435	-0.101659	AT1G10600	hypothetical protein	0.131478	0.0902368	0.215457	0.275722	0.537262	0.525236	0.543956	0.890911	AT1G09240	nicotianamine synthase, putative	-1.76234	-1.90248	-2.49355	-3.18484	-2.23792	-2.43374	-2.5999	-2.89996
AT1G09740	ethylene-responsive protein, putative	0.107635	0.137494	0.217143	0.106461	-0.103792	0.0558656	-0.109588	-0.0293119	AT1G09810	ECT11 (evolutionarily conserved C-terminal region 11)	-0.514763	-0.150695	-0.166342	-0.503026	-0.360309	-0.666217	-0.0782049	-1.05867	AT1G10650	protein binding / zinc ion binding	0.155683	0.116245	0.0810521	0.166934	0.128514	0.140534	0.0539413	0.264415	AT1G09270	importin alpha-1 subunit, putative (IMPA4)	-0.359752	-0.14016	-0.137553	-0.0731407	-0.0959451	-0.496736	-0.0713139	-1.04487
AT1G09800	tRNA pseudouridine synthase family protein	0.0781167	0.143563	0.0301117	0.0957769	0.0126079	0.136701	0.286535	0.566601	AT1G09840	shaggy-related protein kinase kappa / ASK-kappa (ASK10)	-0.273068	-0.030962	-0.0683743	-0.278412	-0.171767	-0.483947	-0.0056327	-0.825524	AT1G11120	hypothetical protein	0.672716	0.657516	0.660991	0.427397	0.415847	0.648249	0.901356	0.828185	AT1G09480	cinnamyl-alcohol dehydrogenase family / CAD family	-0.441617	-0.52356	-0.424531	-0.193784	-0.209851	-0.314324	-0.317793	-0.234428
AT1G09815	POLD4; delta DNA polymerase	0.235629	0.193281	0.137074	0.203205	0.0789345	0.132972	0.253632	0.293246	AT1G09970	leucine-rich repeat transmembrane protein kinase, putative	-0.45224	-0.271154	-0.294905	-0.224391	-0.276984	-0.101217	-0.217422	-0.113697	AT1G11300	carbohydrate binding / kinase	-0.0320136	0.125358	0.45123	0.825179	0.597874	1.18529	1.23444	1.77255	AT1G09640	elongation factor 1B-gamma, putative / eEF-1B gamma, putative	-0.135501	-0.052498	-0.0290116	0.1122	-0.0385635	-0.237951	0.059495	-0.108061
AT1G09930	ATOPT2 (oligopeptide transporter 2); oligopeptide transporter	-0.637185	-0.385567	-0.307249	1.94911	1.44284	0.921611	0.344981	1.61481	AT1G10070	ATBCAT-2; branched-chain-amino-acid transaminase/ catalytic	-1.03394	-1.49118	-1.42012	-1.22647	-0.332522	-0.632482	-0.00236992	-0.158072	AT1G11600	CYP77B1 (cytochrome P450, family 77, subfamily B, polypeptide 1); oxygen binding	0.643347	0.670648	0.353864	0.11595	0.320577	0.161074	0.12333	0.26146	AT1G09660	KH domain-containing quaking protein, putative	-0.310153	-0.188384	-0.334037	-0.599808	-0.617401	-0.453057	-0.359277	-0.71737
AT1G10230	ASK18 (ARABIDOPSIS SKP1-LIKE 18); protein binding / ubiquitin-protein ligase	0.298921	0.430359	0.601173	0.542268	0.175383	0.172577	0.577075	0.168264	AT1G10140	hypothetical protein	-0.444819	-0.652123	-1.03258	-1.42032	0.0632594	-0.174949	-0.503651	-0.6709	AT1G11700	hypothetical protein	0.275145	0.138139	0.393337	0.588392	0.310864	0.738062	0.920847	1.29218	AT1G10155	ATPP2-A10 (Phloem protein 2-A10)	-0.555407	-1.09716	-1.55511	-1.60744	-1.48376	-1.34562	-1.65174	-1.9919
AT1G10280	hypothetical protein	0.227227	0.258536	0.361026	0.137894	-0.283813	-0.0782536	-0.0397497	-0.134229	AT1G10300	GTP-binding protein-related	-1.24166	-0.765354	-1.37991	-1.41265	-0.0898807	-0.806314	-0.221412	-0.737862	AT1G11780	oxidoreductase, 2OG-Fe(II) oxygenase family protein	0.167727	0.120068	0.226376	0.309579	0.150114	0.0880614	0.150445	0.199078	AT1G10400	UDP-glycosyltransferase/ transferase, transferring glycosyl groups	-0.664608	-0.521927	-1.80623	-2.49923	-0.613951	-0.512059	-0.359708	-0.629668
AT1G10430	PP2A-2 (protein phosphatase 2a-2); protein serine/threonine phosphatase	0.111463	0.122193	0.195678	0.156628	-0.0478224	0.0122411	0.0482938	-0.025024	AT1G10330	pentatricopeptide (PPR) repeat-containing protein	-0.341446	-0.383507	-0.48526	-0.89635	-0.0498169	-0.110251	-0.0247742	-0.0352168	AT1G11840	ATGLX1 (GLYOXALASE I HOMOLOG); lactoylglutathione lyase	0.455688	0.489668	0.756216	0.792019	0.476742	0.489257	0.574807	0.741884	AT1G10410	hypothetical protein	-0.236699	-0.162577	-0.173624	-0.0891589	-0.105063	-0.288509	-0.348186	-0.217811
AT1G10590	DNA-binding protein-related	0.149987	0.149431	0.216109	0.266586	0.0313105	-0.0148378	0.170563	0.0304472	AT1G10360	ATGSTU18 (GLUTATHIONE S-TRANSFERASE 29); glutathione transferase	-0.107373	-0.28452	-0.275184	-0.508992	0.00593973	0.0561497	-0.0718064	-0.290075	AT1G11905	hypothetical protein	0.0943614	0.161523	0.275604	0.359183	0.368681	0.174829	0.189065	0.267056	AT1G10455	hypothetical protein	-0.641556	-0.690996	-0.676038	-0.681592	-0.681093	-0.723756	-0.652926	-0.62256
AT1G10700	ribose-phosphate pyrophosphokinase 3 / phosphoribosyl diphosphate synthetase 3 (PRS3)	0.241467	0.212371	0.410025	0.341871	-0.0309037	0.117051	0.0801431	0.264546	AT1G10380	hypothetical protein	-0.0699275	-0.122711	-0.613371	-0.667277	0.412854	0.292806	-0.052268	-0.0292859	AT1G11910	aspartyl protease family protein	0.173477	0.0902983	0.189282	0.0718023	0.0311092	0.195448	0.122136	0.315544	AT1G10480	ZFP5 (ZINC FINGER PROTEIN 5); nucleic acid binding / transcription factor/ zinc ion binding	-0.436759	-0.573762	-0.341488	-0.633691	-0.307074	-0.271182	-0.326602	-0.352293
AT1G10830	sodium symporter-related	0.271415	0.168202	0.16508	0.0082615	0.0114897	0.0315258	-0.125093	0.104319	AT1G10390	nucleoporin family protein	-0.00996904	-0.0647651	0.0439432	-0.0456827	-0.0220237	-0.0597943	-0.0144493	-0.0322639	AT1G12050	fumarylacetoacetase, putative	0.192494	0.0824284	0.224726	0.293714	0.245954	0.208203	0.153871	0.488883	AT1G10682	misc_RNA	-0.271245	-0.226695	-0.36433	-0.864417	-0.112129	-0.128153	-0.339382	-0.677731
AT1G11020	zinc finger (C3HC4-type RING finger) family protein	0.0954569	0.0939875	0.225387	0.364998	0.164355	0.0709636	0.108618	0.154541	AT1G10460	GLP7 (GERMIN-LIKE PROTEIN 7); manganese ion binding / metal ion binding / nutrient reservoir	-0.340843	-0.379555	-0.85666	-1.37978	-0.262142	-0.141155	-0.139332	-0.351438	AT1G12060	ATBAG5 (ARABIDOPSIS THALIANA BCL-2-ASSOCIATED ATHANOGENE 5); protein binding	0.546445	0.420523	0.373245	0.220773	0.282092	0.281088	0.282417	0.470679	AT1G10770	invertase/pectin methylesterase inhibitor family protein	-1.44843	-1.57254	-1.69887	-1.7927	-0.212281	-1.71312	-1.624	-1.96376
AT1G11112	hypothetical protein	0.862191	0.74323	0.65866	0.15158	0.0477482	0.444651	0.650719	0.0619044	AT1G10538	pseudo	-3.34513	-3.31735	-3.29998	-3.29181	-2.28061	-3.33145	-3.31831	-1.09429	AT1G12330	hypothetical protein	0.398466	0.339865	0.21014	0.425433	0.393496	0.363664	0.503109	0.720428	AT1G10910	hypothetical protein	-0.185889	-0.25922	-0.387445	-0.516958	-0.166727	-0.342403	-0.09665	-0.745773
AT1G11200	hypothetical protein	0.0899719	0.0458692	0.275006	0.262969	0.0293512	-0.0824142	-0.0906094	-0.112183	AT1G10560	armadillo/beta-catenin repeat family protein / U-box domain-containing protein	-0.265353	-0.256901	-0.917936	-1.27208	-0.249534	0.265512	0.271541	-0.000397067	AT1G12400	DNA binding	0.238071	0.251196	0.526846	0.338947	0.122709	0.384207	0.223198	0.185891	AT1G10940	ASK1 (ARABIDOPSIS SERINE/THREONINE KINASE 1); kinase	-0.399951	-0.42637	-0.329838	-0.65576	-0.72357	-0.736052	-0.772974	-1.04638
AT1G11475	DNA-directed RNA polymerase II, putative	0.278972	0.0731074	0.0770685	0.0485556	0.0171593	0.102927	0.0551507	0.174695	AT1G10750	hypothetical protein	-0.184345	-0.137235	-0.699373	-1.03771	-0.132852	-0.0250287	0.0642507	-0.24933	AT1G12845	hypothetical protein	0.41498	0.7795	1.02494	1.45144	0.910569	0.559407	1.02205	0.959865	AT1G10980	hypothetical protein	-1.69371	-1.99176	-1.93459	-2.67496	-1.40848	-2.21293	-2.45408	-2.89785
AT1G11755	transferase	0.194672	0.202264	0.470563	0.356907	-0.378032	-0.130356	-0.0608752	-0.248932	AT1G10760	SEX1 (STARCH EXCESS 1)	-0.17566	-0.278371	-0.460155	-0.573408	0.241084	0.238864	0.0367395	0.131467	AT1G12880	ATNUDT12 (Arabidopsis thaliana Nudix hydrolase homolog 12); hydrolase	0.76503	1.0218	0.850722	0.906989	0.964295	0.923359	1.09034	0.745851	AT1G10990	hypothetical protein	-0.95443	-1.08525	-1.5726	-2.02416	-0.72932	-0.781589	-0.636592	-1.03852
AT1G11760	hypothetical protein	0.156193	0.144372	0.0670465	0.000616196	-0.102642	0.119676	0.242753	0.272739	AT1G10840	TIF3H1 (EUKARYOTIC TRANSLATION INITIATION FACTOR 3 SUBUNIT H1); translation initiation factor	-0.150783	-0.115846	-0.145289	-0.0303033	-0.26509	-0.350895	-0.0733283	-0.346482	AT1G12890	AP2 domain-containing transcription factor, putative	1.58166	2.54965	2.9247	3.51535	1.60994	1.75625	2.25562	1.98368	AT1G11060	hypothetical protein	-0.254568	-0.16598	-0.375156	-0.6746	-0.481293	-0.379194	-0.439702	-0.236594
AT1G11803	pseudo	1.5477	1.46551	1.48145	1.90156	0.330044	0.448041	0.0135866	0.14833	AT1G10890	F-box family protein	-0.250123	-0.162838	-0.217987	-0.0184731	-0.19155	-0.206005	0.0651697	-0.178633	AT1G13080	CYP71B2 (CYTOCHROME P450 71B2); oxygen binding	0.732947	0.524691	0.665935	0.382355	0.772476	1.22069	0.679619	1.17753	AT1G11070	hydroxyproline-rich glycoprotein family protein	-0.294279	-0.854807	-1.70257	-2.23136	-0.517147	-0.806141	-1.2353	-1.09683
AT1G11890	SEC22 (secretion 22); transporter	0.133479	0.217673	0.354101	0.236593	-0.038905	-0.0259576	-0.129316	-0.225773	AT1G10970	ZIP4 (ZINC TRANSPORTER 4 PRECURSOR); cation transmembrane transporter	-0.187638	-0.439526	-1.30832	-1.14355	0.312592	-1.02781	-1.16886	-1.06353	AT1G13280	AOC4 (ALLENE OXIDE CYCLASE 4)	0.404159	0.445955	0.738404	0.540856	0.239776	0.196067	0.262823	0.150935	AT1G11080	SCPL31 (serine carboxypeptidase-like 31); serine carboxypeptidase	-0.273733	-0.606919	-1.21138	-2.05176	-1.09978	-0.718892	-1.25741	-1.89613
AT1G11910	aspartyl protease family protein	0.173477	0.0902983	0.189282	0.0718023	0.0311092	0.195448	0.122136	0.315544	AT1G11050	protein kinase family protein	-0.437257	-0.458292	-0.423094	-0.507065	0.0819846	-0.319305	-0.358038	-0.408046	AT1G13330	hypothetical protein	0.483133	0.389125	0.674823	0.464224	0.331042	0.256272	0.39762	0.383007	AT1G11185	misc_RNA	-0.174138	-0.138181	-0.725074	-1.10416	-0.355772	-0.565449	-0.850655	-0.694238
AT1G11940	hypothetical protein	0.190977	0.258355	0.307565	0.21977	0.00671393	0.0961698	0.0912125	0.133555	AT1G11190	BFN1 (BIFUNCTIONAL NUCLEASE I); nucleic acid binding	-0.0721973	-0.218039	-0.4666	-0.770454	0.132107	0.0166482	-0.567098	-0.261308	AT1G13430	sulfotransferase family protein	0.916288	0.841232	0.77963	0.146124	0.605937	0.724357	0.413606	0.509779	AT1G11260	STP1 (SUGAR TRANSPORTER 1); carbohydrate transmembrane transporter/ sugar:hydrogen ion symporter	-0.550067	-0.441634	-0.601595	-0.769021	-0.0996261	-0.223098	-0.510596	-0.629861
AT1G11950	transcription factor	0.317242	0.157632	0.136557	0.168454	-0.143469	0.0788412	0.00160132	0.193046	AT1G11280	S-locus protein kinase, putative	-0.222987	-0.279726	-0.529868	-0.614593	0.117924	0.0234734	0.0526414	0.06326	AT1G13440	GAPC-2; glyceraldehyde-3-phosphate dehydrogenase	0.360465	0.388547	0.544973	0.626627	0.0734547	0.26462	0.0763359	0.20896	AT1G11330	S-locus lectin protein kinase family protein	-0.387002	-0.465686	-0.434177	-0.660946	-0.864464	-0.61543	-0.786005	-0.446137
AT1G11960	early-responsive to dehydration protein-related / ERD protein-related	1.00931	1.10527	1.27922	1.49768	0.254687	0.243066	0.0266052	0.359397	AT1G11360	universal stress protein (USP) family protein	0.807222	-0.61416	-0.488339	-0.614269	-0.451117	-0.631862	-0.46015	-0.385056	AT1G13448	misc_RNA	0.71988	0.444379	0.51264	0.168518	1.77615	1.5194	1.01988	0.976232	AT1G11580	ATPMEPCRA; pectinesterase	-0.731106	-0.602516	-0.928681	-1.25683	-0.524116	-1.28709	-1.07023	-1.19752
AT1G11990	hypothetical protein	0.710701	0.397217	0.769215	0.358268	0.354516	-0.0940482	-0.232203	0.165602	AT1G11380	hypothetical protein	-0.622173	-0.579879	-0.785881	-0.949115	0.0922323	-0.241583	-0.491689	-0.56563	AT1G13590	ATPSK1 (PHYTOSULFOKINE 1 PRECURSOR); growth factor	0.438812	0.648388	0.784793	0.978423	0.218527	0.209909	0.38747	0.0988937	AT1G11670	MATE efflux family protein	-0.629603	-0.527689	-0.530855	-0.489634	-0.665927	-0.595382	-0.655958	-0.720818
AT1G12244	DNA binding / hydrolase, acting on ester bonds / nuclease/ nucleic acid binding / recombinase	0.306771	0.301606	0.426337	0.108273	-0.163174	-0.0499855	-0.0713463	-0.359556	AT1G11400	PYM (PARTNER OF Y14-MAGO)	-0.295478	-0.327116	-0.126426	-0.0118891	-0.208817	-0.325386	-0.259916	-0.892865	AT1G13780	hypothetical protein	0.0349697	0.106322	0.131247	0.0220309	-0.134992	-0.0443488	-0.0450136	-0.152746	AT1G11680	CYP51G1 (CYTOCHROME P450 51); oxygen binding	-0.158184	-0.126164	-0.184066	-0.0803659	-0.155681	-0.161558	-0.0565234	-0.138159
AT1G12400	DNA binding	0.238071	0.251196	0.526846	0.338947	0.122709	0.384207	0.223198	0.185891	AT1G11592	miscRNA	-0.199301	-0.210432	-0.262294	-0.149294	-0.0893479	-0.124815	-0.0483767	-0.0774847	AT1G13860	dehydration-responsive protein-related	0.19513	0.273433	0.305019	0.125833	-0.0486093	-0.0100564	0.0556546	-0.0227242	AT1G11740	ankyrin repeat family protein	-0.247175	-1.26953	-1.92827	-2.38057	-1.17793	-0.75682	-1.37692	-1.5713
AT1G12630	DNA binding / transcription activator/ transcription factor	0.312288	0.701935	0.911432	0.577362	-0.237057	-0.0783161	0.694903	-0.264736	AT1G11710	pentatricopeptide (PPR) repeat-containing protein	-0.130259	-0.14261	-0.364601	-0.266725	-0.0924982	-0.114372	-0.114296	0.0609108	AT1G14240	nucleoside phosphatase family protein / GDA1/CD39 family protein	0.179723	0.142073	0.590156	1.90337	1.41638	1.22134	0.810623	1.68591	AT1G11800	endonuclease/exonuclease/phosphatase family protein	-0.0721768	-0.225239	-0.382328	-0.589248	-0.210569	-0.191736	-0.143492	-0.150387
AT1G12672	pseudo	2.07873	1.92672	2.58643	2.55294	1.81713	2.15138	1.54867	2.30668	AT1G11810	F-box family protein	-0.292464	-0.332045	-0.29715	-0.298808	-0.270559	-0.372455	-0.344219	-0.247261	AT1G14340	RNA recognition motif (RRM)-containing protein	0.265556	0.310687	0.544871	0.663315	0.296086	0.165088	0.0663859	0.154058	AT1G11820	hydrolase, hydrolyzing O-glycosyl compounds	-0.212516	-0.13207	-0.311613	-0.332729	-0.138931	-0.361545	-0.16493	-0.351971
AT1G12830	hypothetical protein	0.233433	0.27652	0.37533	0.279796	-0.00210134	0.190302	0.234303	0.280169	AT1G11850	hypothetical protein	-0.0983765	-0.122434	-0.544103	-0.531176	-0.0429483	-0.141451	0.0313726	-0.136826	AT1G14440	ATHB31 (ARABIDOPSIS THALIANA HOMEOBOX PROTEIN 31); transcription factor	0.461076	0.497047	0.432667	0.285132	0.306532	0.237601	0.408698	0.360668	AT1G12010	1-aminocyclopropane-1-carboxylate oxidase, putative / ACC oxidase, putative	-1.82599	-2.34455	-3.46073	-4.58828	-1.87266	-2.2371	-2.76619	-2.9078
AT1G12980	ESR1 (ENHANCER OF SHOOT REGENERATION 1); DNA binding / transcription factor	2.19957	2.51315	2.69686	2.8317	1.42187	2.38852	2.89571	2.88975	AT1G11915	hypothetical protein	-0.184793	-0.122655	-0.492353	-0.782541	-0.0112676	-0.0564376	-0.0539989	-0.306426	AT1G14600	DNA binding / transcription factor	0.194118	0.173312	0.741674	0.868015	0.425155	0.366126	0.626545	0.529843	AT1G12080	hypothetical protein	-0.919118	-1.16596	-1.29987	-1.70734	-0.190793	-0.49613	-0.338182	-1.36067
AT1G13060	PBE1 (20S proteasome beta subunit E1); peptidase	0.240489	0.1679	0.263974	0.17101	-0.0830136	0.0933637	0.0436095	0.123367	AT1G12070	Rho GDP-dissociation inhibitor family protein	-0.499864	-0.563372	-1.41702	-1.84731	0.024478	-0.274495	-0.197008	-0.48515	AT1G14630	hypothetical protein	0.631819	0.341321	0.253789	0.837745	0.80221	0.835048	0.944809	1.65771	AT1G12100	lipid binding	-0.885042	-0.351249	-0.531656	-1.33979	-0.394651	-1.06385	-0.620579	-1.41041
AT1G13380	hypothetical protein	0.105738	0.17197	0.326078	0.681621	0.38177	0.122119	0.276273	0.338444	AT1G12080	hypothetical protein	-0.919118	-1.16596	-1.29987	-1.70734	-0.190793	-0.49613	-0.338182	-1.36067	AT1G14820	SEC14 cytosolic factor family protein / phosphoglyceride transfer family protein	0.262192	0.263084	0.401482	0.264137	0.225911	0.224468	0.226412	0.242956	AT1G12160	flavin-containing monooxygenase family protein / FMO family protein	-0.144623	-0.135467	-0.293978	-0.582668	-0.30355	-0.197564	-0.227761	-0.265343
AT1G13400	JGL/NUB (NUBBIN); nucleic acid binding / zinc ion binding	0.629204	0.948771	1.09016	1.14284	-0.0602751	0.536332	1.04521	0.893858	AT1G12150	hypothetical protein	-0.143443	-0.708604	-1.12125	-2.05942	-0.848935	-0.122508	-0.92117	-0.934642	AT1G15000	SCPL50 (serine carboxypeptidase-like 50); serine carboxypeptidase	0.489395	0.473649	0.34316	0.463862	0.259164	0.564471	0.650329	0.716193	AT1G12360	KEU (KEULE); protein transporter	-0.161941	-0.192698	-0.187085	-0.441494	-0.504781	-0.262352	-0.470221	-0.641021
AT1G13440	GAPC-2; glyceraldehyde-3-phosphate dehydrogenase	0.360465	0.388547	0.544973	0.626627	0.0734547	0.26462	0.0763359	0.20896	AT1G12250	thylakoid lumenal protein-related	-0.0740441	-0.171825	-0.119278	-0.503963	0.0542396	-0.115964	-0.358927	-0.540869	AT1G15010	hypothetical protein	1.74498	2.17502	2.86791	3.19072	1.03877	1.50595	1.16449	1.17345	AT1G12440	zinc finger (AN1-like) family protein	-0.177161	-0.17293	-0.148195	-0.375634	-0.187157	-0.207113	-0.180211	-0.555211
AT1G13570	F-box family protein	0.117986	0.135068	0.193277	0.163395	-0.005772	0.100164	0.129777	0.0182643	AT1G12260	VND4 (VASCULAR RELATED NAC-DOMAIN PROTEIN 4); transcription factor	-0.106633	-0.229249	-0.624375	-0.976662	0.268268	0.258068	0.0934946	0.253377	AT1G15150	MATE efflux family protein	0.572112	0.994138	1.30547	1.09311	1.59967	1.29605	1.60241	2.40217	AT1G12460	leucine-rich repeat transmembrane protein kinase, putative	-0.267005	-0.137072	-0.0717115	-0.325064	-0.453988	-0.739741	-0.544667	-0.980999
AT1G13700	glucosamine/galactosamine-6-phosphate isomerase family protein	0.615697	0.732426	0.961466	1.05368	0.419959	0.302247	0.127376	0.0894596	AT1G12290	disease resistance protein (CC-NBS-LRR class), putative	-0.172137	-0.217366	-0.170649	-0.370111	-0.136046	0.0409086	-0.148689	0.20192	AT1G15180	MATE efflux family protein	0.15922	0.0863691	0.0325402	-0.19982	0.00737115	0.178825	-0.0115876	0.184903	AT1G12470	Pep3/Vps18/deep orange family protein	-0.0478149	-0.105208	-0.205125	-0.430857	-0.262026	-0.155031	-0.337323	-0.312955
AT1G13710	CYP78A5 (cytochrome P450, family 78, subfamily A, polypeptide 5); oxygen binding	0.0961496	0.232584	0.535866	0.483782	-0.493252	0.0919125	0.118523	0.279052	AT1G12300	pentatricopeptide (PPR) repeat-containing protein	-0.166581	-0.170235	-0.262402	-0.322989	-0.0190001	-0.00897341	-0.110938	-0.0101107	AT1G15190	hypothetical protein	0.6057	0.792898	0.648984	0.280605	0.365182	0.482416	0.67772	0.789452	AT1G12500	phosphate translocator-related	-0.646522	-0.303998	-0.411433	-0.724627	-0.861773	-1.12315	-0.611431	-1.89262
AT1G13860	dehydration-responsive protein-related	0.19513	0.273433	0.305019	0.125833	-0.0486093	-0.0100564	0.0556546	-0.0227242	AT1G12360	KEU (KEULE); protein transporter	-0.161941	-0.192698	-0.187085	-0.441494	-0.504781	-0.262352	-0.470221	-0.641021	AT1G15240	phox (PX) domain-containing protein	0.0920676	0.0562778	0.10207	-0.0820137	-0.167141	0.167457	-0.00586801	0.169274	AT1G12560	ATEXPA7 (ARABIDOPSIS THALIANA EXPANSIN A7)	-0.0806974	-0.305211	-0.828141	-1.45483	-0.453719	-0.162764	-0.670161	-0.826297
AT1G14010	emp24/gp25L/p24 family protein	0.151765	0.185042	0.255978	0.179139	-0.0904182	0.0934861	0.0118932	0.162001	AT1G12411	hypothetical protein	-0.967901	-0.779498	-1.28982	-0.371691	0.974122	0.24184	-0.217904	0.771638	AT1G15310	ATHSRP54A (Arabidopsis thaliana signal recognition particle 54kDa A); 7S RNA binding / GTP binding / mRNA binding	0.1241	0.197977	0.48611	0.866005	1.17051	1.23008	1.41802	1.96141	AT1G12650	hypothetical protein	-0.00526606	-0.0418189	-0.0431503	0.0525146	-0.0990219	-0.160518	-0.0458421	-0.189806
AT1G14100	FUT8 (FUCOSYLTRANSFERASE 8); galactoside 2-alpha-L-fucosyltransferase	0.742517	1.0354	1.32178	1.21119	0.0946515	-0.084618	-0.139209	-0.279439	AT1G12440	zinc finger (AN1-like) family protein	-0.177161	-0.17293	-0.148195	-0.375634	-0.187157	-0.207113	-0.180211	-0.555211	AT1G15580	IAA5 (indoleacetic acid-induced protein 5); transcription factor	1.29457	0.856647	1.08576	1.2851	0.465041	1.14688	0.326716	0.615003	AT1G12680	PEPKR2 (PHOSPHOENOLPYRUVATE CARBOXYLASE-RELATED KINASE 2); kinase	-0.207906	-0.100811	-0.199964	-0.843968	-0.616489	-0.215534	-0.276382	-0.546512
AT1G14140	mitochondrial substrate carrier family protein	0.143768	0.123312	0.0902295	0.10914	-0.0393846	-0.0381279	0.032474	0.0053032	AT1G12500	phosphate translocator-related	-0.646522	-0.303998	-0.411433	-0.724627	-0.861773	-1.12315	-0.611431	-1.89262	AT1G15640	hypothetical protein	0.73215	0.542217	0.787976	0.673072	0.472844	0.794597	0.657383	1.24796	AT1G12740	CYP87A2 (cytochrome P450, family 87, subfamily A, polypeptide 2); oxygen binding	-0.865736	-1.0667	-1.95693	-2.06894	-0.648019	-0.141077	-0.186394	-0.0826474
AT1G14205	ribosomal protein L18 family protein	0.462351	0.167996	0.226524	0.138335	-0.0379539	0.148512	-0.00330535	-0.0652887	AT1G12730	cell division cycle protein-related	-0.269622	-0.355793	-0.707929	-0.733769	0.319972	-0.102217	-0.0183427	-0.294208	AT1G15760	hypothetical protein	0.555606	0.680998	0.554086	0.145064	0.186988	0.471345	0.776277	0.774745	AT1G12950	MATE efflux family protein	-0.303116	-0.549192	-0.956177	-1.08963	-0.478422	-0.2213	-0.685609	-0.679464
AT1G14230	nucleoside phosphatase family protein / GDA1/CD39 family protein	0.247571	0.295646	0.398352	0.46237	0.0308862	0.0818153	0.0599735	0.169	AT1G12805	nucleotide binding	-0.589084	-0.767732	-1.44149	-2.45791	0.00171884	-0.220519	0.361799	-0.684902	AT1G16140	pseudo	0.465897	0.534602	0.87916	0.544265	0.189294	0.577202	0.280783	0.663756	AT1G13210	ACA.L (AUTOINHIBITED CA2+/ATPASE II); ATPase, coupled to transmembrane movement of ions, phosphorylative mechanism / calmodulin binding	-0.404748	-0.218833	-0.326132	-0.3394	-0.239168	-0.297293	-0.288679	-0.432236
AT1G14250	nucleoside phosphatase family protein / GDA1/CD39 family protein	0.347958	0.783707	1.20479	0.337561	-0.222283	0.225778	0.0370682	0.101965	AT1G12810	proline-rich family protein	-0.180758	-0.321312	-0.218242	-0.337014	-0.284367	-0.17328	-0.352302	-0.345433	AT1G16340	ATKDSA2/ATKSDA; 3-deoxy-8-phosphooctulonate synthase	0.113261	0.177107	0.222675	0.0812452	0.18008	0.276309	0.343416	0.159245	AT1G13245	DVL4/RTFL17 (ROTUNDIFOLIA LIKE 17)	-0.172143	-0.308655	-0.362316	-0.383246	-0.0551243	-0.415572	-0.638627	-0.740308
AT1G14280	PKS2 (PHYTOCHROME KINASE SUBSTRATE 2)	0.231053	0.227434	0.4475	0.208547	0.280898	0.117005	-0.148606	-0.176436	AT1G12920	ERF1-2 (EUKARYOTIC RELEASE FACTOR 1-2); translation release factor	-0.0805585	-0.0701417	-0.248936	-0.213376	-0.171689	-0.0260349	0.171017	0.125618	AT1G16410	CYP79F1 (SUPERSHOOT 1)	0.557901	0.825869	0.967803	0.781377	1.30519	1.1684	1.271	1.82452	AT1G13260	RAV1 (Related to ABI3/VP1 1); DNA binding / transcription factor	-1.54493	-1.01886	-0.739589	-0.545611	-0.629885	-1.83146	-1.03835	-3.12994
AT1G14360	ATUTR3/UTR3 (UDP-GALACTOSE TRANSPORTER 3); pyrimidine nucleotide sugar transmembrane transporter	0.230103	0.199945	0.19986	0.286085	-0.3575	-0.0612026	-0.0842218	0.00284213	AT1G13110	CYP71B7 (cytochrome P450, family 71, subfamily B, polypeptide 7); oxygen binding	-0.220402	-0.435171	-0.491993	-0.511257	-0.199239	-0.162381	-0.272484	0.0264972	AT1G16430	surfeit locus protein 5 family protein / SURF5 family protein	0.313436	0.333714	0.473277	0.555771	0.224992	0.238746	0.341178	0.280325	AT1G13300	myb family transcription factor	-0.662651	-0.731319	-1.07073	-1.66284	-0.457182	-0.213455	-0.494159	-0.296469
AT1G14450	hypothetical protein	0.222557	0.195366	0.251776	0.229749	-0.145948	0.0648115	0.122243	-0.0265105	AT1G13220	LINC2 (LITTLE NUCLEI2); protein binding	0.0547759	-0.077234	-0.324325	-0.342489	0.084872	0.224656	0.26534	0.119009	AT1G16520	hypothetical protein	0.255089	0.261024	0.230864	0.39476	0.470182	0.407947	0.468381	0.791047	AT1G13320	PP2AA3/PR65 (PROTEIN PHOSPHATASE 2A SUBUNIT A3); protein phosphatase type 2A regulator	-0.0698665	-0.130999	-0.15211	-0.399188	-0.182788	-0.225536	-0.275342	-0.198507
AT1G14680	hypothetical protein	0.326048	0.329916	0.369816	0.290088	0.0892308	0.106259	-0.00826559	0.149178	AT1G13420	sulfotransferase family protein	-0.683983	-2.29564	-1.82745	-0.762922	-0.898191	0.260926	-0.725565	-0.160464	AT1G16730	hypothetical protein	0.552425	0.344163	1.19573	1.82607	0.814659	0.567003	0.521605	0.62429	AT1G13480	hypothetical protein	-1.39414	-1.44044	-1.82259	-1.43217	-1.13181	-1.53976	-1.51533	-1.44751
AT1G14710	hydroxyproline-rich glycoprotein family protein	-0.168312	0.0206025	-0.169152	-0.444586	-0.654721	-0.195352	-0.0242858	0.0292235	AT1G13460	serine/threonine protein phosphatase 2A (PP2A) regulatory subunit B', putative	-0.102639	-0.127563	-0.174262	-0.159472	0.0127162	-0.0709564	-0.0871967	-0.0396072	AT1G16750	hypothetical protein	0.403124	0.261824	0.314184	0.350812	0.199969	0.368892	0.453404	0.714914	AT1G13520	hypothetical protein	-1.09127	-0.938834	-0.562142	-0.253442	-0.559004	-0.42515	-0.414489	-0.297209
AT1G14750	SDS (SOLO DANCERS); cyclin-dependent protein kinase	0.241349	0.251176	0.407391	0.252697	-0.198958	-0.0638693	-0.146927	-0.0714476	AT1G13500	hypothetical protein	-0.641486	-0.82969	-0.636764	-0.581923	-0.91014	-0.816742	-0.590749	-0.305737	AT1G16790	ribosomal protein-related	0.267189	0.319882	0.346559	0.65649	0.422163	0.228935	0.463237	0.451762	AT1G13530	hypothetical protein	-0.717918	-0.842994	-0.842572	-0.90513	-0.950568	-0.381844	-0.514722	-0.806099
AT1G14820	SEC14 cytosolic factor family protein / phosphoglyceride transfer family protein	0.262192	0.263084	0.401482	0.264137	0.225911	0.224468	0.226412	0.242956	AT1G13510	hypothetical protein	-0.484545	-0.609692	-0.574696	-0.40359	-0.692358	-0.292896	-0.491255	0.109012	AT1G16840	hypothetical protein	0.190215	0.216677	0.35071	0.418407	0.200655	0.203809	0.184908	0.261276	AT1G13610	hypothetical protein	-0.361052	-0.324341	-0.971363	-1.49513	-0.105484	-1.22892	-0.841447	-1.92007
AT1G14990	hypothetical protein	0.280481	0.294916	0.599621	0.842173	0.385835	0.107141	0.309636	0.444687	AT1G13620	hypothetical protein	-0.134589	-0.22678	-0.688158	-1.32642	-0.0348426	-0.34695	-0.191084	-1.00155	AT1G16850	hypothetical protein	1.64935	2.05615	2.89371	3.23496	2.43554	2.80435	2.90772	3.06959	AT1G13910	leucine-rich repeat family protein	-0.388402	-0.457885	-0.726406	-0.936814	-0.42783	-0.689233	-0.756143	-0.87802
AT1G15020	ATQSOX1/QSO2 (QUIESCIN-SULFHYDRYL OXIDASE 1); thiol-disulfide exchange intermediate	0.167159	0.219307	0.326813	0.309959	0.0748484	0.178205	0.109379	0.246023	AT1G13640	phosphatidylinositol 3- and 4-kinase family protein	-0.166009	-0.254802	-0.432441	-0.376433	-0.0678278	0.0258893	0.12577	0.0470944	AT1G17020	SRG1 (SENESCENCE-RELATED GENE 1); oxidoreductase, acting on paired donors, with incorporation or reduction of molecular oxygen, 2-oxoglutarate as one donor, and incorporation of one atom each of oxygen into both donors	0.12586	0.147624	0.812413	1.24491	0.667776	0.338606	0.326643	0.897075	AT1G14040	ATP binding / ATPase, coupled to transmembrane movement of substances	-0.611517	-0.247194	-0.49816	-0.572789	-0.341426	-0.882771	-0.676254	-1.08243
AT1G15405	misc_RNA	0.302363	0.532551	0.792939	0.85244	0.0743428	0.0793861	0.431013	-0.0152829	AT1G13650	hypothetical protein	-1.09883	-0.984308	-1.51769	-2.75613	0.11889	-0.642602	-0.726479	-1.35543	AT1G17100	SOUL heme-binding family protein	0.556494	0.308262	0.463257	0.346094	0.496831	0.796353	0.649787	0.596767	AT1G14210	ribonuclease T2 family protein	-0.385338	-0.454325	-0.607198	-0.960373	-0.60257	-0.652979	-0.684645	-0.63449
AT1G15430	hypothetical protein	0.0965937	0.211731	0.346911	0.359194	-0.111959	0.038911	-0.00597319	0.0989579	AT1G13670	hypothetical protein	-0.563396	-0.828032	-1.40803	-1.5645	0.0164034	-0.596569	-0.990571	-0.843025	AT1G17145	protein binding / zinc ion binding	0.202663	0.126743	0.175987	0.054603	-0.0380213	0.131207	0.104906	0.0486705	AT1G14290	acid phosphatase, putative	-0.163469	-0.288401	-0.433986	-0.596162	-0.209674	-0.255302	-0.443847	-0.738547
AT1G15540	oxidoreductase, 2OG-Fe(II) oxygenase family protein	1.30309	1.64094	1.77183	1.26591	-0.299844	0.862327	0.577835	0.646771	AT1G13880	ELM2 domain-containing protein	-0.184446	-0.0769893	-0.0986874	-0.302065	0.0537886	0.080601	-0.0114103	0.0379601	AT1G17380	JAZ5/TIFY11A (JASMONATE-ZIM-DOMAIN PROTEIN 5)	1.13236	1.47769	3.08694	3.52784	1.25351	1.32148	1.15444	1.72135	AT1G14500	ankyrin repeat family protein	-0.325969	-0.441002	-0.984772	-1.55697	-0.742675	-0.613117	-0.788922	-1.32547
AT1G15630	hypothetical protein	0.758818	0.565934	0.648905	0.0499132	0.167311	0.172118	0.490284	-0.142971	AT1G13990	hypothetical protein	-0.465093	-0.48862	-0.214508	-0.206044	0.253101	-0.202846	-0.235945	-0.0535134	AT1G17420	LOX3 (Lipoxygenase 3); iron ion binding / lipoxygenase/ metal ion binding / oxidoreductase, acting on single donors with incorporation of molecular oxygen, incorporation of two atoms of oxygen	-0.53786	-0.842874	-0.404673	-0.66543	-0.593901	-0.538189	-0.690149	-0.554023	AT1G14540	anionic peroxidase, putative	-1.67254	-1.84322	-1.27808	-0.933994	-0.87635	-0.992756	-0.94177	-1.18286
AT1G15790	hypothetical protein	0.390598	0.585003	0.931703	0.873239	0.218465	0.254918	0.0226458	0.389842	AT1G14080	FUT6 (fucosyltransferase 6); fucosyltransferase/ transferase, transferring glycosyl groups	-0.188118	-0.158651	-0.299044	-0.102179	-0.0948431	-0.0779548	-0.0378867	0.0452885	AT1G17490	hypothetical protein	0.289801	0.355103	0.551404	0.484098	0.212165	0.24107	0.311503	0.194717	AT1G14870	hypothetical protein	-1.23036	-1.17492	-0.818815	-0.467557	-1.00741	-0.867926	-0.833483	-0.417786
AT1G15885	hypothetical protein	0.426598	0.213336	0.289223	0.441374	0.279117	0.238199	0.291397	0.0161392	AT1G14150	oxygen evolving enhancer 3 (PsbQ) family protein	-0.0809946	-0.254905	-0.411018	-0.779482	0.12035	0.0973563	-0.115908	-0.103719	AT1G17510	hypothetical protein	0.30279	0.446691	0.742508	0.759681	0.239434	0.256767	0.471032	0.315868	AT1G15125	S-adenosylmethionine-dependent methyltransferase	-1.85532	-2.19482	-3.48677	-3.4598	-2.91193	-2.90182	-2.01293	-3.05497
AT1G16000	hypothetical protein	0.24351	0.322775	0.531435	0.252298	-0.180333	0.0253944	0.0955837	-0.232385	AT1G14160	integral membrane family protein	-0.293206	-0.352577	-0.199415	-0.364401	-0.346192	-0.0281969	-0.289306	-0.118226	AT1G17744	hypothetical protein	1.27335	1.0359	1.70715	1.9643	1.76781	1.96447	1.43919	2.16463	AT1G15130	hydroxyproline-rich glycoprotein family protein	-0.212185	-0.180167	-0.114604	-0.293561	-0.389563	-0.818985	-0.541444	-0.540155
AT1G16040	hypothetical protein	0.0493818	0.0798646	0.148204	0.238932	0.108829	0.00523617	0.11005	-0.0302557	AT1G14220	ribonuclease T2 family protein	-0.465193	-0.984693	-1.70225	-1.85541	-0.541979	-0.0052239	-0.383418	-0.637311	AT1G17830	hypothetical protein	0.326571	0.82296	1.86593	2.01852	0.789966	0.473363	1.09096	0.482199	AT1G15210	ATPDR7/PDR7 (PLEIOTROPIC DRUG RESISTANCE 7); ATPase, coupled to transmembrane movement of substances	-0.659898	-0.412519	-0.864529	-1.14652	-0.64043	-0.827702	-0.436212	-1.41606
AT1G16190	DNA repair protein RAD23, putative	0.290319	0.304562	0.327249	0.244646	-0.214431	0.0571507	0.0215383	0.202299	AT1G14260	zinc finger (C3HC4-type RING finger) family protein	-0.739458	-0.32318	-0.54539	-0.410458	-0.204032	-1.09229	-0.150345	-1.3423	AT1G18075	misc_RNA	0.468209	0.540025	0.341292	0.548824	0.299256	0.368015	0.795702	0.646829	AT1G15290	binding	-0.0308345	0.117872	-0.0588257	-0.248774	-0.660856	-0.225626	0.0134154	-0.743751
AT1G16210	hypothetical protein	0.155199	0.161088	0.304498	0.355055	0.0876216	0.163199	0.0520407	0.361364	AT1G14730	hypothetical protein	-0.335215	-0.326694	-0.650388	-1.03543	0.468433	0.0802205	-0.00463729	-0.390962	AT1G18100	E12A11; phosphatidylethanolamine binding	1.43355	1.84114	2.09307	2.10741	1.45129	1.8145	1.95665	2.32987	AT1G15380	lactoylglutathione lyase family protein / glyoxalase I family protein	-0.597359	-1.08579	-1.35968	-1.67269	-1.20457	-0.998921	-1.28883	-1.20831
AT1G16250	kelch repeat-containing F-box family protein	0.187896	0.00247486	0.00654969	0.262326	0.310956	0.400006	0.361901	0.696901	AT1G14960	major latex protein-related / MLP-related	-1.37675	-3.83603	-1.56713	-0.739647	-0.19115	1.23617	0.464757	0.854257	AT1G18265	hypothetical protein	0.59182	0.212435	0.398029	0.626099	1.24228	1.28642	1.16622	1.47792	AT1G15385	hypothetical protein	-0.207745	-0.159317	-0.70384	-1.17132	-0.992499	-0.757462	-0.794057	-1.34763
AT1G16530	ASL9/LBD3 (LOB DOMAIN-CONTAINING PROTEIN 3)	0.330836	0.256613	0.52602	0.367431	-0.0505178	0.194859	0.389061	0.482697	AT1G15060	hypothetical protein	-0.0215702	-0.284953	-0.489216	-0.553989	0.107103	0.231199	0.0473154	0.280171	AT1G18290	hypothetical protein	0.295755	0.399257	0.586004	0.673633	0.665218	0.907738	0.729472	0.810513	AT1G15490	hydrolase, alpha/beta fold family protein	-0.205505	-0.209043	-0.441563	-0.746487	-0.546244	-0.346376	-0.363952	-0.566183
AT1G16640	transcriptional factor B3 family protein	0.15314	0.212432	0.287038	0.338488	-0.0253657	-0.207683	0.184505	0.196288	AT1G15110	phosphatidyl serine synthase family protein	-0.295973	-0.159221	-0.270539	-0.258736	-0.317474	-0.143118	-0.023166	-0.227847	AT1G18415	misc_RNA	0.239779	0.279804	0.10357	0.217271	0.0902012	0.189221	0.229365	0.356598	AT1G15500	ATNTT2; ATP:ADP antiporter	-0.368682	-0.227315	-0.305797	-0.292854	-0.216853	-0.285669	-0.190266	-0.237796
AT1G16705	p300/CBP acetyltransferase-related protein-related	0.828569	0.854555	0.983309	1.01135	0.676269	0.555193	0.226696	0.0138194	AT1G15170	MATE efflux family protein	-0.616824	-0.643625	-0.537787	-0.305704	-0.107063	-0.194114	-0.279987	0.0669618	AT1G18670	IBS1 (IMPAIRED IN BABA-INDUCED STERILITY 1); kinase	0.262324	0.383155	0.441194	0.52743	0.220782	0.239026	0.432997	0.676548	AT1G15550	GA4 (GA REQUIRING 4); gibberellin 3-beta-dioxygenase	-0.190246	-0.333529	-0.557221	-0.308651	-0.297982	-0.281903	-0.385531	-0.33912
AT1G16740	ribosomal protein L20 family protein	0.209744	0.204272	0.176037	0.0778412	-0.132512	0.0754583	0.245077	0.0837007	AT1G15200	protein-protein interaction regulator family protein	-0.192635	-0.0701568	-0.255965	-0.0685284	-0.106026	-0.0285036	0.226577	0.184562	AT1G18710	AtMYB47 (myb domain protein 47); DNA binding / transcription factor	4.00223	4.80329	5.6828	5.7681	4.42805	5.5636	5.6664	6.3434	AT1G15640	hypothetical protein	0.73215	0.542217	0.787976	0.673072	0.472844	0.794597	0.657383	1.24796
AT1G16780	vacuolar-type H+-translocating inorganic pyrophosphatase, putative	0.146712	0.22141	0.292227	0.393045	0.0871367	-0.00336503	0.089163	0.301235	AT1G15280	glycine-rich protein	-0.184498	-0.262328	-0.418073	-0.547899	-0.248733	-0.17097	-0.1495	-0.0392993	AT1G19080	TTN10 (TITAN 10)	0.136871	0.0888672	0.0515752	0.29821	0.281707	0.179602	0.272261	0.344201	AT1G15670	kelch repeat-containing F-box family protein	-0.412902	-0.363425	-0.210273	-0.43346	-0.240616	-0.490855	-0.534392	-0.356128
AT1G16870	mitochondrial 28S ribosomal protein S29-related	0.210438	0.207131	0.204159	0.451745	0.220027	0.140685	0.348282	0.492996	AT1G15330	CBS domain-containing protein	0.38563	-0.442171	-0.33784	-0.0637417	1.01652	1.63753	1.75658	1.15437	AT1G19330	hypothetical protein	0.365423	0.286017	0.222997	0.211696	0.565196	0.521579	0.466592	0.535535	AT1G15750	TPL/WSIP1 (WUS-INTERACTING PROTEIN 1)	-0.196798	-0.0806731	-0.281567	-0.559326	-0.52875	-0.299379	-0.4189	-0.552468
AT1G16920	RAB11 (ARABIDOPSIS RAB GTPASE HOMOLOG A1B); GTP binding	0.132297	0.237404	0.160392	0.106776	-0.0473373	0.0675535	0.213339	0.049888	AT1G15340	MBD10 (methyl-CpG-binding domain 10); DNA binding	-0.222363	-0.212954	-0.366936	-0.577033	-0.341123	-0.110725	-0.0670105	-0.0510644	AT1G19350	BES1 (BRI1-EMS-SUPPRESSOR 1)	0.858342	1.19429	1.29977	1.3029	0.410105	0.631273	0.402595	0.258887	AT1G15780	protein binding / transcription cofactor	-0.116928	-0.0849502	-0.132553	-0.271646	-0.322635	-0.177202	-0.195665	-0.375947
AT1G17080	hypothetical protein	0.150057	0.160405	0.30844	0.330006	0.056714	0.0887666	-0.0145776	-0.0436575	AT1G15350	hypothetical protein	-0.0348309	-0.147558	-0.163871	0.0462673	0.190821	0.0949158	0.0823221	-0.118005	AT1G19570	DHAR1 (DEHYDROASCORBATE REDUCTASE); glutathione dehydrogenase (ascorbate)	0.28162	0.458889	0.966199	0.976844	0.734103	0.598871	0.781611	0.79383	AT1G15820	LHCB6 (LIGHT HARVESTING COMPLEX PSII); chlorophyll binding	0.0672166	-0.079939	-0.213786	-0.29204	-0.140979	-0.0961884	-0.098153	-0.204444
AT1G17090	hypothetical protein	0.543064	0.477835	0.785357	0.657872	-0.191311	0.109302	-0.0196973	-0.212765	AT1G15480	DNA binding	-0.0737429	-0.137628	-0.425977	-0.705173	-0.509441	-0.162359	-0.161324	0.243148	AT1G19630	CYP722A1 (cytochrome P450, family 722, subfamily A, polypeptide 1); oxygen binding	0.274203	0.385326	0.330238	0.170013	1.09496	0.581816	0.379486	0.427853	AT1G15890	disease resistance protein (CC-NBS-LRR class), putative	-0.195287	-0.418247	-0.552291	-1.13806	-0.679641	-0.17884	-0.56801	-0.338352
AT1G17110	UBP15 (UBIQUITIN-SPECIFIC PROTEASE 15); ubiquitin-specific protease	0.102301	0.13027	0.215001	0.670729	0.202532	-0.0135009	0.266669	0.266334	AT1G15700	ATPC2 (ATP synthase gamma chain 2)	-0.0970897	-0.0857221	-0.201146	-0.342759	-0.160117	-0.114714	-0.0485719	-0.0824765	AT1G19640	JMT (JASMONIC ACID CARBOXYL METHYLTRANSFERASE); jasmonate O-methyltransferase	0.906608	1.30568	1.30364	0.881637	0.502573	0.509571	0.588133	0.949202	AT1G16060	ovule development protein, putative	-0.158084	-0.153224	-0.20617	-0.18946	-0.207034	-0.275916	-0.275362	-0.234936
AT1G17140	tropomyosin-related	0.320714	0.144919	0.0286475	-0.0283331	-0.249374	0.126979	0.0650345	0.312884	AT1G15870	mitochondrial glycoprotein family protein / MAM33 family protein	-0.152868	-0.10823	-0.229639	-0.327412	-0.29424	-0.173106	0.129076	0.0561458	AT1G19680	protein binding / zinc ion binding	0.162367	0.0153044	0.0166509	0.0879425	0.0880671	0.242272	0.266356	0.518702	AT1G16160	WAKL5 (WALL ASSOCIATED KINASE-LIKE 5); kinase	-0.334291	-0.370572	-0.7771	-0.952879	-0.62174	-0.671661	-0.854095	-1.16929
AT1G17260	AHA10 (AUTOINHIBITED H(+)-ATPASE ISOFORM 10); ATPase	0.317954	0.188879	0.244413	0.320311	0.153787	0.338234	0.305675	0.527561	AT1G15940	binding	-0.108116	-0.0877312	-0.252042	-0.225264	0.0023245	-0.0493044	0.0864915	0.0779749	AT1G19690	binding / catalytic/ coenzyme binding	0.400703	0.481974	0.49052	0.712708	0.366661	0.426241	0.622163	0.709965	AT1G16270	protein kinase family protein	-0.155025	-0.0801605	-0.355821	-0.876531	-0.688716	-0.235202	-0.394047	-0.445819
AT1G17290	ALAAT1 (ALANINE AMINOTRANSFERAS); alanine transaminase	0.129514	0.201781	0.227029	0.0931697	-0.110721	0.138215	-0.0166593	0.204191	AT1G15960	NRAMP6 (NRAMP metal ion transporter 6); metal ion transmembrane transporter	-0.248955	-0.423857	-1.04665	-1.19427	0.00677825	-0.264775	-0.344676	-0.378589	AT1G19750	transducin family protein / WD-40 repeat family protein	0.254728	0.371701	0.410062	1.80527	1.25761	0.934904	1.11019	1.58509	AT1G16360	LEM3 (ligand-effect modulator 3) family protein / CDC50 family protein	-0.609519	-0.560423	-0.74414	-0.727594	-0.335964	-0.580999	-0.856006	-0.66086
AT1G17360	COP1-interacting protein-related	0.151695	0.393712	0.400173	0.338624	-0.0311746	0.0690199	-0.0358681	-0.0922544	AT1G16280	DEAD/DEAH box helicase, putative	0.0101484	-0.0856733	-0.151629	-0.179868	-0.104884	-0.0842935	-0.00901037	0.112816	AT1G19840	auxin-responsive family protein	0.724367	0.603342	0.643109	0.491464	0.218522	0.380857	0.329045	0.277275	AT1G16390	ATOCT3 (ARABIDOPSIS THALIANA ORGANIC CATION/CARNITINE TRANSPORTER2); carbohydrate transmembrane transporter/ sugar:hydrogen ion symporter	-1.41646	-1.50467	-1.85171	-1.92931	-0.531703	-0.653355	-0.77503	-0.58688
AT1G17410	nucleoside diphosphate kinase family protein	0.16878	0.0722135	0.142107	-0.0550175	-0.0309485	0.0888312	0.0329881	-0.22769	AT1G16370	ATOCT6; carbohydrate transmembrane transporter/ sugar:hydrogen ion symporter	-0.239859	-0.84511	-0.533869	-0.642336	-0.196577	0.267219	-0.277821	0.06116	AT1G19970	ER lumen protein retaining receptor family protein	0.549937	0.354925	0.477207	0.713088	0.491523	0.579567	0.56707	0.698505	AT1G16400	CYP79F2 (cytochrome P450, family 79, subfamily F, polypeptide 2); oxygen binding	-0.638237	-0.39967	-0.829778	-1.13937	-0.672882	-0.970377	-1.20399	-0.936781
AT1G17420	LOX3 (Lipoxygenase 3); iron ion binding / lipoxygenase/ metal ion binding / oxidoreductase, acting on single donors with incorporation of molecular oxygen, incorporation of two atoms of oxygen	-0.53786	-0.842874	-0.404673	-0.66543	-0.593901	-0.538189	-0.690149	-0.554023	AT1G16440	protein kinase, putative	-0.299546	-0.0501685	-1.48733	-2.05654	-0.0798996	0.396495	-0.587729	-0.207846	AT1G20070	hypothetical protein	0.837444	0.351853	0.724557	0.714927	0.625438	0.699752	0.438052	0.302112	AT1G16650	hypothetical protein	-0.203957	-0.206569	-0.287853	-0.499683	-0.616066	-0.447096	-0.368089	-0.446857
AT1G17480	IQD7 (IQ-domain 7); calmodulin binding	0.515622	0.506585	0.52651	0.270421	0.0675613	0.0015316	0.252193	0.349121	AT1G16720	HCF173 (HIGH CHLOROPHYLL FLUORESCENCE PHENOTYPE 173); binding / catalytic/ oxidoreductase/ transcription repressor	-0.147396	-0.562429	-0.781234	-0.90151	0.0743934	-0.0367732	-0.38449	-0.174331	AT1G20230	pentatricopeptide (PPR) repeat-containing protein	0.173415	0.228053	0.212106	0.569784	0.405522	0.292102	0.389593	0.829744	AT1G16710	HAC12 (HISTONE ACETYLTRANSFERASE OF THE CBP FAMILY 12); H3/H4 histone acetyltransferase/ transcription cofactor	-0.016556	0.0756577	0.0297775	0.0299644	0.0474129	0.0119057	0.236203	0.0349605
AT1G17550	HAB2 (Homology to ABI2); protein serine/threonine phosphatase	0.331123	0.294059	0.30993	0.419428	0.340663	0.295939	0.10564	0.445388	AT1G16910	hypothetical protein	-1.10582	-1.57033	-2.00587	-2.02218	-0.871245	-0.666431	-0.78878	-1.87118	AT1G20310	hypothetical protein	1.65019	1.89184	3.27604	2.92601	1.46489	2.31321	2.17402	2.23572	AT1G16720	HCF173 (HIGH CHLOROPHYLL FLUORESCENCE PHENOTYPE 173); binding / catalytic/ oxidoreductase/ transcription repressor	-0.147396	-0.562429	-0.781234	-0.90151	0.0743934	-0.0367732	-0.38449	-0.174331
AT1G17615	disease resistance protein (TIR-NBS class), putative	0.807034	1.62968	2.19926	1.28369	-0.0844716	1.52547	0.50143	0.770926	AT1G17147	hypothetical protein	-0.184146	-0.569998	-0.383349	-0.494445	-0.150284	0.134332	0.0753457	-0.29562	AT1G20450	ERD10/LTI45 (EARLY RESPONSIVE TO DEHYDRATION 10)	0.548086	0.652073	0.929161	0.942044	0.33235	0.637896	0.236837	0.551847	AT1G16905	sugar binding	-0.443165	-0.420454	-1.16162	-1.14878	-0.742164	-0.52097	-0.472868	-0.404484
AT1G17720	ATB BETA (Arabidopsis thaliana serine/threonine protein phosphatase 2A 55 kDa regulatory subunit B beta isofor); nucleotide binding	0.0992788	0.251758	0.359937	0.3899	0.0437346	-0.0621824	0.160687	0.00577092	AT1G17160	pfkB-type carbohydrate kinase family protein	-0.0139964	-0.100804	-0.0760542	-0.230035	0.0486235	0.010421	-0.103729	-0.0114138	AT1G20490	AMP-dependent synthetase and ligase family protein	0.244476	0.195539	0.702757	1.25257	0.748566	1.42044	1.4196	1.97502	AT1G16930	F-box family protein	-0.45852	-0.383439	-0.29048	-0.436389	-0.347298	-0.543656	-0.454021	-0.884297
AT1G17730	VPS46	0.0696193	0.0466082	0.280084	-0.11936	-0.132008	-0.0859443	-0.157797	-0.190495	AT1G17230	protein binding / protein kinase	0.439988	-0.25489	0.201034	-0.488477	-0.601857	0.0531947	0.0494477	-0.579763	AT1G20696	HMGB3 (HIGH MOBILITY GROUP B 3); transcription factor	-0.839562	-0.118983	0.784534	2.64249	0.953675	-0.0363484	0.623017	0.483946	AT1G17210	zinc ion binding	-0.425154	-0.133148	-0.364306	-0.67819	-0.581992	-0.500851	-0.164274	-0.457821
AT1G17750	leucine-rich repeat transmembrane protein kinase, putative	0.0435352	0.202226	0.254388	0.386129	0.201988	0.0433183	0.0998097	0.400255	AT1G17240	leucine-rich repeat family protein	-0.0627771	-0.279233	-0.242091	-0.483889	-0.146492	-0.0267362	-0.232931	0.00892302	AT1G20770	hypothetical protein	0.231916	0.197729	0.35346	0.354731	0.153831	0.279872	0.348838	0.243987	AT1G17235	RTFL11 (ROTUNDIFOLIA LIKE 11)	-0.893993	-0.652885	-1.48344	-2.04122	-0.716105	-0.885792	-0.556736	-2.19637
AT1G17840	ABCG11/COF1/DSO/WBC11 (DESPERADO); ATPase, coupled to transmembrane movement of substances	0.0579503	0.122426	0.387189	0.148372	-0.371022	-0.0407058	0.0134066	0.251892	AT1G17400	hypothetical protein	-0.249153	-0.668851	-0.778467	-1.46061	-0.62574	0.0230005	-0.406392	-0.270412	AT1G21410	SKP2A; protein binding	0.470676	0.398686	0.741062	0.372967	0.571744	0.615419	0.364442	0.529734	AT1G17285	hypothetical protein	-0.70068	-0.692738	-1.22881	-1.6537	-0.422595	-0.491762	-0.362019	-1.24938
AT1G18200	AtRABA6b (Arabidopsis Rab GTPase homolog A6b); GTP binding	0.303119	0.472034	0.450406	0.35248	0.000523474	-0.0542862	-0.0586855	0.127615	AT1G17460	TRFL3 (TRF-LIKE 3); DNA binding / transcription factor	-0.155813	-0.153171	-0.266568	-0.49507	-0.245912	-0.146142	-0.0568443	-0.118479	AT1G21520	hypothetical protein	0.752874	0.960023	1.97689	1.8533	0.117803	0.733973	0.593618	0.691771	AT1G17300	hypothetical protein	-1.72519	-2.05477	-2.34871	-3.14016	-0.926394	-0.77778	-1.20888	-1.45437
AT1G18210	calcium-binding protein, putative	0.297325	0.395675	0.555462	0.586368	-0.160802	-0.090045	-0.0177028	0.20548	AT1G17680	transcription factor-related	-0.047045	-0.136498	-0.148274	-0.216894	-0.0829296	0.0361191	-0.0830249	0.0549787	AT1G21525	pseudo	0.967768	1.59929	2.13468	2.32077	0.590694	1.51771	0.990178	0.625859	AT1G17310	MADS-box protein (AGL100)	-0.470847	-0.535653	-1.049	-1.28782	-0.335201	-0.390852	-0.787594	-0.376632
AT1G18490	hypothetical protein	0.2706	0.12413	0.169848	0.0189346	0.173797	0.177048	0.0784687	0.0500573	AT1G17760	ATCSTF77/CSTF77 (Cleavage stimulation factor 77); protein binding	-0.0717072	-0.118184	-0.165952	-0.494864	-0.275033	-0.0898037	-0.168266	-0.107025	AT1G21590	protein kinase family protein	0.327522	-0.0299139	0.118385	0.259599	0.176821	0.556019	0.425971	0.633177	AT1G17590	CCAAT-binding transcription factor (CBF-B/NF-YA) family protein	-0.425316	-0.456531	-0.392148	-0.51194	-0.425012	-0.53459	-0.530193	-0.49104
AT1G18540	60S ribosomal protein L6 (RPL6A)	0.0528968	0.118754	0.10308	0.256065	-0.138222	-0.0789831	0.183727	0.00200948	AT1G18160	protein kinase family protein	-0.0823362	-0.156999	-0.30228	-0.564402	-0.30303	-0.107603	-0.199432	-0.26663	AT1G21670	hypothetical protein	0.0565656	0.0171911	0.169699	0.300564	0.137666	0.213856	0.0563105	0.504433	AT1G17665	hypothetical protein	-0.105467	-0.302889	-0.175547	-0.367298	-0.173844	-0.417697	-0.405734	-0.514027
AT1G18600	rhomboid family protein	0.267487	0.252969	0.36993	0.446278	0.130369	0.0677859	0.114613	0.268171	AT1G18390	protein kinase family protein	-0.509481	-0.375508	-0.22534	-0.201889	-0.190771	-0.120523	-0.235237	-0.0379479	AT1G21770	hypothetical protein	0.172298	0.207693	0.240181	0.21704	0.246005	0.251442	0.146091	0.0591018	AT1G17710	phosphoric monoester hydrolase	-1.00981	-2.24233	-2.66354	-2.87493	-0.895058	-0.50072	-1.04541	-0.791573
AT1G18610	hypothetical protein	0.11786	0.178025	0.123978	0.208597	0.12538	-0.109657	0.20126	-0.241	AT1G18460	lipase family protein	-0.198527	-0.511145	-0.627151	-1.04478	-0.42259	0.047571	-0.522722	-0.015153	AT1G22150	SULTR1;3 (sulfate transporter); sulfate transmembrane transporter	0.251815	0.310516	0.344135	1.3177	0.802187	1.79094	1.41149	1.34091	AT1G17720	ATB BETA (Arabidopsis thaliana serine/threonine protein phosphatase 2A 55 kDa regulatory subunit B beta isofor); nucleotide binding	0.0992788	0.251758	0.359937	0.3899	0.0437346	-0.0621824	0.160687	0.00577092
AT1G18680	HNH endonuclease domain-containing protein	0.26844	0.208355	0.303086	0.315012	0.0701597	-0.0233476	-0.0845636	-0.0943756	AT1G18500	IPMS1/MAML-4 (METHYLTHIOALKYLMALATE SYNTHASE-LIKE 4); 2-isopropylmalate synthase	-0.178248	-0.387581	-0.446566	-0.48481	-0.451098	-0.325465	-0.611948	-0.267319	AT1G22160	senescence-associated protein-related	0.492605	0.13454	0.473372	1.011	1.01531	0.950774	0.717771	1.04534	AT1G18260	suppressor of lin-12-like protein-related / sel-1 protein-related	0.0818659	0.0111217	0.0347908	0.418377	0.563394	0.365778	0.17595	0.58956
AT1G18890	ATCDPK1; calmodulin-dependent protein kinase/ kinase/ protein kinase	0.116218	0.374562	0.653779	0.683031	0.272589	0.185665	0.0470587	0.218192	AT1G18570	MYB51 (MYB DOMAIN PROTEIN 51); DNA binding / transcription factor	-0.716406	-0.576317	-0.468993	-0.385286	0.0324954	-0.172952	0.0881716	-0.558747	AT1G22170	phosphoglycerate/bisphosphoglycerate mutase family protein	0.40666	0.4499	0.572595	0.461395	0.0781486	0.287327	0.328855	0.314071	AT1G18270	ketose-bisphosphate aldolase class-II family protein	-0.392446	-0.499897	-0.761739	-0.954344	-0.316642	-0.128456	-0.386725	-0.208207
AT1G18940	nodulin family protein	0.736302	0.476619	0.554428	0.497448	0.0654117	0.467429	-0.0120642	0.435048	AT1G18750	AGL65; DNA binding / transcription factor	-0.213097	-0.161368	-0.351127	-0.412912	0.0543818	0.123645	0.104798	0.185721	AT1G22180	SEC14 cytosolic factor family protein / phosphoglyceride transfer family protein	0.230816	0.385043	0.547407	0.964548	0.337159	0.297683	0.234423	0.56617	AT1G18420	hypothetical protein	-0.312192	-0.38267	-0.82472	-0.971069	-0.355856	-0.218152	-0.34303	-0.928335
AT1G19120	small nuclear ribonucleoprotein, putative / snRNP, putative / Sm protein, putative	0.127819	0.0832764	0.101426	0.218306	0.168651	0.0318437	0.058419	0.0265457	AT1G18830	transducin family protein / WD-40 repeat family protein	-0.143849	-0.370453	-0.727831	-1.20808	1.42739	0.425316	0.193168	-0.217871	AT1G22250	hypothetical protein	0.227535	0.177613	0.522256	0.429006	0.356526	0.610558	0.677704	0.76073	AT1G18470	zinc finger (C3HC4-type RING finger) family protein	-0.0734164	-0.0930689	-0.0548479	-0.0735023	0.085278	-0.102446	-0.270758	-0.149897
AT1G19130	hypothetical protein	0.0942558	0.0997942	0.137296	-0.0623034	-0.285371	0.0305926	0.0207924	-0.0580702	AT1G18850	hypothetical protein	-0.2611	-0.20384	-0.329799	-0.215097	-0.106569	-0.201595	0.0554978	0.140527	AT1G22340	ATUGT85A7 (UDP-GLUCOSYL TRANSFERASE 85A7); UDP-glycosyltransferase/ glucuronosyltransferase/ transferase, transferring glycosyl groups	0.80979	1.10359	2.04146	1.92318	0.42623	0.615259	0.750097	1.18142	AT1G18500	IPMS1/MAML-4 (METHYLTHIOALKYLMALATE SYNTHASE-LIKE 4); 2-isopropylmalate synthase	-0.178248	-0.387581	-0.446566	-0.48481	-0.451098	-0.325465	-0.611948	-0.267319
AT1G19300	GATL1/GLZ1/PARVUS (GALACTURONOSYLTRANSFERASE-LIKE 1); polygalacturonate 4-alpha-galacturonosyltransferase/ transferase, transferring glycosyl groups / transferase, transferring hexosyl groups	0.328917	0.449648	0.846443	0.862531	0.0264532	0.0744268	-0.0038894	0.116808	AT1G18880	proton-dependent oligopeptide transport (POT) family protein	-0.390981	-0.279819	-0.445942	-0.691983	-0.0195303	-0.105136	-0.200703	-0.207769	AT1G22350	pseudo	0.248778	0.285031	0.636738	0.861226	0.544122	0.757485	0.795052	0.964026	AT1G18660	zinc finger (C3HC4-type RING finger) family protein	-0.147703	-0.12501	-0.175937	-0.200776	-0.157364	-0.175765	-0.218642	-0.181722
AT1G19350	BES1 (BRI1-EMS-SUPPRESSOR 1)	0.858342	1.19429	1.29977	1.3029	0.410105	0.631273	0.402595	0.258887	AT1G18960	myb family transcription factor	-0.334635	-0.786838	-1.06339	-1.44211	-0.160958	0.418965	-0.0236459	0.0443974	AT1G22370	ATUGT85A5 (UDP-GLUCOSYL TRANSFERASE 85A5); transferase, transferring glycosyl groups	-0.039311	0.103785	0.229305	0.386804	0.499258	0.290451	0.363086	0.478281	AT1G18690	transferase/ transferase, transferring glycosyl groups	-0.528052	-0.488694	-0.966268	-1.09221	-0.507974	-0.395056	-0.631011	-0.495575
AT1G19490	bZIP transcription factor family protein	0.189516	0.105451	0.15351	0.116305	-0.243572	0.00452981	0.0376868	0.310715	AT1G19110	inter-alpha-trypsin inhibitor heavy chain-related	-0.361519	-0.310042	-0.50792	-0.812162	-0.405676	-0.426755	-0.362899	-0.724464	AT1G22403	misc_RNA	0.238694	0.331947	0.349803	0.328792	0.170083	0.227607	0.430394	0.115728	AT1G18910	protein binding / zinc ion binding	-0.237113	-0.143805	-0.220986	-0.5018	-0.59416	-0.361216	-0.478433	-0.575242
AT1G19600	pfkB-type carbohydrate kinase family protein	0.211943	0.250854	0.301682	0.197287	0.021643	0.287114	0.433162	0.43355	AT1G19190	hydrolase	-0.22874	-0.27759	-0.222623	-0.518959	-0.164015	-0.0764573	-0.221596	-0.258259	AT1G22450	COX6B (CYTOCHROME C OXIDASE 6B); cytochrome-c oxidase	0.109298	0.053201	0.0935384	0.239785	0.0652936	0.0802323	0.153676	0.0864392	AT1G18970	GLP4 (GERMIN-LIKE PROTEIN 4); manganese ion binding / metal ion binding / nutrient reservoir	-1.73528	-1.80979	-1.55358	-1.10802	-2.05105	-1.84216	-2.10087	-1.49801
AT1G19640	JMT (JASMONIC ACID CARBOXYL METHYLTRANSFERASE); jasmonate O-methyltransferase	0.906608	1.30568	1.30364	0.881637	0.502573	0.509571	0.588133	0.949202	AT1G19230	respiratory burst oxidase protein E (RbohE) / NADPH oxidase	-0.130647	-0.421159	-0.739697	-0.977484	-0.372067	-0.0978202	-0.599876	-0.364045	AT1G22710	SUC2 (SUCROSE-PROTON SYMPORTER 2); carbohydrate transmembrane transporter/ sucrose transmembrane transporter/ sucrose:hydrogen symporter/ sugar:hydrogen ion symporter	0.487366	0.565011	0.45302	0.450215	0.433213	0.566704	0.461213	0.479367	AT1G19110	inter-alpha-trypsin inhibitor heavy chain-related	-0.361519	-0.310042	-0.50792	-0.812162	-0.405676	-0.426755	-0.362899	-0.724464
AT1G19670	ATCLH1 (CORONATINE-INDUCED PROTEIN 1)	0.938603	0.490742	1.87891	1.96547	-0.316703	0.0823222	0.0877165	0.540731	AT1G19250	FMO1 (FLAVIN-DEPENDENT MONOOXYGENASE 1); monooxygenase	-0.764503	-0.39428	-0.0810114	-0.540535	-0.157185	0.14766	-0.209637	0.779812	AT1G22800	methyltransferase	0.101029	0.150267	0.164431	0.0640804	0.0455218	0.18425	0.200071	0.268755	AT1G19220	ARF19 (AUXIN RESPONSE FACTOR 11); transcription factor	-0.158435	-0.465433	-0.655595	-0.84482	-0.41236	-0.234158	-0.43078	-0.380008
AT1G19730	ATTRX4 (thioredoxin H-type 4); thiol-disulfide exchange intermediate	0.154101	0.211126	0.44133	0.594227	0.133096	-0.0423135	0.0203941	-0.106833	AT1G19270	ubiquitin interaction motif-containing protein / LIM domain-containing protein	-0.0255165	0.00917018	-0.129322	0.0573839	0.177505	0.084959	-0.0636885	0.276991	AT1G22990	heavy-metal-associated domain-containing protein / copper chaperone (CCH)-related	0.33887	0.249552	0.694919	0.513497	1.05782	0.74412	0.743893	1.03175	AT1G19360	hypothetical protein	-0.230989	-0.196132	-0.179773	-0.189577	-0.0467454	-0.309871	-0.160326	-0.528761
AT1G19780	ATCNGC8 (CYCLIC NUCLEOTIDE GATED CHANNEL 8); calmodulin binding / cyclic nucleotide binding / ion channel	2.24856	2.17403	1.7855	1.53158	-0.278828	1.83336	1.55496	1.34586	AT1G19370	hypothetical protein	-0.225623	-0.184867	-0.365697	-0.256185	-0.0339604	-0.397676	-0.253489	-0.137341	AT1G23201	pseudo	2.18382	2.30344	3.2578	3.8898	1.51233	2.31909	2.16068	2.3836	AT1G19390	wall-associated kinase, putative	-0.373342	-0.480461	-0.670279	-1.04095	-0.109894	-0.279173	-0.377358	-0.26991
AT1G19800	TGD1 (TRIGALACTOSYLDIACYLGLYCEROL 1)	0.0929895	0.194668	0.228297	0.0901087	-0.15488	-0.0396536	0.0517146	-0.0829603	AT1G19397	hypothetical protein	-0.395606	-0.43007	-0.693119	-0.381749	0.46227	0.29421	0.405746	0.577955	AT1G23360	UbiE/COQ5 methyltransferase family protein	0.316611	0.13434	0.0500263	0.258425	0.305964	0.291101	0.217762	0.304217	AT1G19770	ATPUP14 (Arabidopsis thaliana purine permease 14); purine transmembrane transporter	-0.362618	-0.295637	-0.239463	-0.383702	-0.268587	-0.478104	-0.779718	-0.85156
AT1G19830	auxin-responsive protein, putative	0.831297	0.942252	0.98385	0.668305	0.109743	0.216265	0.117508	0.0640782	AT1G19510	myb family transcription factor	-0.605228	-0.705208	-1.15674	-1.57072	0.051407	-0.873482	-1.11111	-1.45739	AT1G23800	ALDH2B7 (Aldehyde dehydrogenase 2B7); 3-chloroallyl aldehyde dehydrogenase/ aldehyde dehydrogenase (NAD)	0.560554	0.403328	0.629936	0.395192	0.357451	0.631671	0.437283	0.759583	AT1G20020	ATLFNR2 (LEAF FNR 2); NADPH dehydrogenase/ oxidoreductase/ poly(U) binding	-0.163125	-0.210297	-0.367747	-0.437491	-0.0967509	-0.145503	-0.280722	-0.255214
AT1G19910	AVA-P2 (vacuolar-H+-pumping ATPase 16 kDa proteolipid subunit 2); ATPase	0.0487446	0.115141	0.351201	0.756577	0.381601	0.0957275	0.155336	0.249432	AT1G19530	hypothetical protein	-0.207557	-0.137667	-1.08682	-1.98988	0.479822	-0.148077	-0.634025	-1.11409	AT1G23820	SPDS1 (SPERMIDINE SYNTHASE 1)	0.116634	0.16712	0.219543	0.119795	0.100123	0.146434	0.236561	0.280685	AT1G20220	nucleic acid binding	-0.173676	-0.13622	-0.392117	-0.373414	-0.530074	-0.302748	-0.149424	-0.188481
AT1G19920	APS2 (ATP SULFURYLASE PRECURSOR)	0.264465	0.26586	0.150845	0.127763	0.072925	0.133267	0.103961	0.283252	AT1G19660	wound-responsive family protein	-0.14104	-0.297215	-0.159553	-0.318768	0.486918	0.222221	0.036292	0.145841	AT1G24070	ATCSLA10 (Cellulose synthase-like A10); transferase, transferring glycosyl groups	0.597339	0.663045	1.44154	1.60384	1.14	1.53257	2.20478	2.6345	AT1G20470	auxin-responsive family protein	-0.149953	-0.395203	-0.558814	-1.02931	-0.459036	-0.487335	-0.79279	-1.10549
AT1G19940	ATGH9B5 (ARABIDOPSIS THALIANA GLYCOSYL HYDROLASE 9B5); hydrolase, hydrolyzing O-glycosyl compounds	0.569066	0.436856	0.492108	0.19629	0.256347	0.369489	-0.0965118	0.109167	AT1G19770	ATPUP14 (Arabidopsis thaliana purine permease 14); purine transmembrane transporter	-0.362618	-0.295637	-0.239463	-0.383702	-0.268587	-0.478104	-0.779718	-0.85156	AT1G24130	transducin family protein / WD-40 repeat family protein	0.368419	0.323215	0.411967	0.259198	1.41566	1.35827	1.131	1.48555	AT1G20550	hypothetical protein	-0.369589	-0.32909	-0.688515	-0.722917	-0.455084	-0.524172	-0.469295	-0.696882
AT1G20080	ATSYTB/NTMC2T1/NTMC2TYPE1/SYTB	0.546741	0.595058	0.634249	0.566016	0.480828	0.514767	0.655514	0.260192	AT1G19870	IQD32 (IQ-domain 32); calmodulin binding	-0.147947	-0.17935	-0.381861	-0.410375	-0.0368702	-0.053236	-0.0432013	-0.0655007	AT1G24267	hypothetical protein	0.139633	0.143314	0.17323	0.462257	0.144939	0.13156	0.200068	0.461924	AT1G20620	CAT3 (CATALASE 3); catalase	-0.0166961	0.0807954	0.119566	0.0226091	-0.00461052	0.144052	0.065483	0.157097
AT1G20130	lipase	0.607352	0.24614	0.404097	2.19311	1.64334	1.08966	0.740204	1.80352	AT1G20020	ATLFNR2 (LEAF FNR 2); NADPH dehydrogenase/ oxidoreductase/ poly(U) binding	-0.163125	-0.210297	-0.367747	-0.437491	-0.0967509	-0.145503	-0.280722	-0.255214	AT1G24400	LHT2 (LYSINE HISTIDINE TRANSPORTER 2); amino acid transmembrane transporter	0.33577	0.250128	0.50219	0.21359	0.306854	0.435626	0.313879	0.343946	AT1G20640	RWP-RK domain-containing protein	-0.119566	-0.253807	-0.403335	-0.45476	-0.49714	-0.269958	-0.243448	-0.409088
AT1G20190	ATEXPA11 (ARABIDOPSIS THALIANA EXPANSIN A11)	0.342969	0.88477	1.50876	2.37203	0.271551	-0.439831	0.504743	-1.27611	AT1G20030	pathogenesis-related thaumatin family protein	-0.154684	-0.186017	-0.126906	-0.325991	0.430123	-0.166661	-0.0213351	-0.245873	AT1G24450	NFD2 (NUCLEAR FUSION DEFECTIVE 2); RNA binding / ribonuclease III	0.139095	0.182297	0.297744	0.228529	0.21039	0.132203	0.242511	0.193181	AT1G20760	calcium-binding EF hand family protein	-0.246186	-0.253982	-0.315056	-0.318751	-0.24956	-0.201185	-0.357577	-0.045319
AT1G20270	oxidoreductase, 2OG-Fe(II) oxygenase family protein	0.247971	0.247241	0.333085	0.209731	-0.000379496	0.0963655	0.0344212	0.174759	AT1G20120	family II extracellular lipase, putative	-0.482897	-0.323144	-0.510562	-0.368026	-0.0562088	-0.765572	-1.01193	-1.29268	AT1G24600	hypothetical protein	0.488533	0.275667	0.602356	0.522206	1.1174	0.812618	0.728047	0.936352	AT1G20780	armadillo/beta-catenin repeat protein-related / U-box domain-containing protein	-0.260903	-0.108617	-0.296906	-0.370211	-0.130191	-0.148323	-0.229676	-0.13505
AT1G20350	ATTIM17-1 (Arabidopsis thaliana translocase inner membrane subunit 17-1); P-P-bond-hydrolysis-driven protein transmembrane transporter	0.179024	1.21676	2.08978	2.07111	-0.247909	-0.629623	-0.812376	-0.385989	AT1G20330	SMT2 (STEROL METHYLTRANSFERASE 2)	-0.127976	0.0119399	-0.0593118	0.000355814	0.289369	0.0424242	0.331619	0.0490352	AT1G24625	ZFP7 (ZINC FINGER PROTEIN 7); nucleic acid binding / transcription factor/ zinc ion binding	0.288592	0.289966	0.341364	0.232473	0.321553	0.218156	0.242953	0.195731	AT1G20900	ESC (ESCAROLA)	-0.436927	-0.32156	-0.600479	-0.465896	-0.352014	-0.487026	-0.230407	-0.341587
AT1G20410	hypothetical protein	0.19699	0.153165	0.0927395	0.0625002	-0.16212	0.0121306	0.0239248	0.0109929	AT1G20520	hypothetical protein	-1.13582	-1.98331	-2.07398	-3.05179	-1.09438	0.0189934	-1.06856	-1.17306	AT1G24733	pseudo	0.381016	0.411432	0.419074	0.599534	0.268702	0.664383	0.632762	0.635346	AT1G20960	EMB1507 (EMBRYO DEFECTIVE 1507); ATP-dependent helicase	-0.0532651	-0.054936	-0.389594	-0.554203	-0.529993	-0.120114	-0.314732	-0.240964
AT1G20816	hypothetical protein	0.317473	0.231435	0.33204	0.673555	0.822079	0.400344	0.335361	0.464574	AT1G20560	AMP-dependent synthetase and ligase family protein	-0.241738	-0.202836	-0.243888	-0.0407697	0.157897	-0.0111452	-0.0828344	0.206626	AT1G25425	CLE43 (CLAVATA3/ESR-RELATED 43)	0.605771	0.7134	1.17011	1.16329	0.389487	0.444345	0.597082	0.490246	AT1G21100	O-methyltransferase, putative	-0.736156	-0.925593	-1.01069	-1.16416	-0.699935	-0.560685	-0.816408	-0.678964
AT1G21070	transporter-related	0.45023	0.396398	0.503794	0.782705	0.456688	0.296615	0.240498	0.569892	AT1G20670	DNA-binding bromodomain-containing protein	-0.0896501	-0.10905	-0.255642	-0.537602	-0.398756	-0.225396	-0.198126	-0.190362	AT1G25460	oxidoreductase family protein	0.512599	0.544659	0.569427	0.135994	0.178538	0.432439	0.248029	0.498079	AT1G21130	O-methyltransferase, putative	-0.599226	-0.879979	-0.913882	-1.16379	-0.565135	-0.452007	-0.835979	-0.541059
AT1G21190	small nuclear ribonucleoprotein, putative / snRNP, putative / Sm protein, putative	0.170347	0.2169	0.412989	0.595763	0.118792	-0.047375	0.192656	0.110822	AT1G20693	HMGB2 (HIGH MOBILITY GROUP B 2); transcription factor	-0.210141	-0.441401	-0.670731	-0.555987	0.36922	0.319501	0.289245	0.400992	AT1G25570	leucine-rich repeat protein-related	0.102253	0.209184	0.208561	0.164369	-0.117055	-0.0455815	-0.0284094	0.0292428	AT1G21200	transcription factor	-0.0725813	-0.146275	-0.181764	-0.235107	0.0595168	-0.038063	-0.153571	0.0848369
AT1G21260	pseudo	0.107019	0.0755486	0.190507	0.168432	0.127647	0.159211	0.0502827	0.26711	AT1G20760	calcium-binding EF hand family protein	-0.246186	-0.253982	-0.315056	-0.318751	-0.24956	-0.201185	-0.357577	-0.045319	AT1G26090	hypothetical protein	0.373591	0.252109	0.119894	0.11643	0.207538	0.319803	0.250833	0.425837	AT1G21230	WAK5 (WALL ASSOCIATED KINASE 5); kinase/ protein serine/threonine kinase	-2.37612	-1.99537	-2.4341	-2.07914	-2.11657	-2.52297	-2.57453	-2.53893
AT1G21480	exostosin family protein	0.123303	0.153305	0.14957	0.0512325	-0.0368835	0.0851161	0.0198293	0.0421934	AT1G20780	armadillo/beta-catenin repeat protein-related / U-box domain-containing protein	-0.260903	-0.108617	-0.296906	-0.370211	-0.130191	-0.148323	-0.229676	-0.13505	AT1G26450	beta-1,3-glucanase-related	0.0931365	0.185166	0.222305	0.108177	0.257535	0.278949	0.353017	0.4126	AT1G21310	ATEXT3 (EXTENSIN 3); structural constituent of cell wall	-0.461988	-0.231189	-0.362522	-0.173702	-0.0837095	-0.0966127	-0.218197	-0.0613639
AT1G21710	OGG1 (8-oxoguanine-DNA glycosylase 1)	0.116409	0.184143	0.155998	0.000277551	-0.00172609	0.0732578	0.20554	0.049944	AT1G20850	XCP2 (XYLEM CYSTEINE PEPTIDASE 2); cysteine-type peptidase/ peptidase	-0.122461	-0.183737	-0.578449	-0.854334	0.316255	0.206329	0.168243	0.0347384	AT1G26550	peptidyl-prolyl cis-trans isomerase PPIC-type family protein	0.114833	0.186231	0.202275	-0.036243	-0.121263	0.0989799	0.00600898	-0.00105345	AT1G21320	nucleic acid binding / nucleotide binding	-2.27242	-1.38812	-2.09207	-2.11229	-2.05291	-2.99388	-3.01107	-3.55122
AT1G21790	hypothetical protein	0.257457	0.187372	0.346435	0.238197	0.178081	0.334076	0.106818	0.310877	AT1G20920	DEAD box RNA helicase, putative	-0.155202	0.0198857	0.00164975	0.356178	-0.361334	-0.315485	0.165543	-0.0392201	AT1G26560	glycosyl hydrolase family 1 protein	0.842451	0.901409	1.53584	1.77136	0.862788	0.921072	0.872302	1.18558	AT1G21326	VQ motif-containing protein	-1.88739	-1.66891	-2.03885	-1.6323	-1.16447	-1.55505	-1.53237	-1.38882
AT1G21900	emp24/gp25L/p24 family protein	0.263162	0.215902	0.298565	0.250864	0.00919909	0.190083	0.127179	0.300334	AT1G21100	O-methyltransferase, putative	-0.736156	-0.925593	-1.01069	-1.16416	-0.699935	-0.560685	-0.816408	-0.678964	AT1G26770	ATEXPA10 (ARABIDOPSIS THALIANA EXPANSIN A10)	1.15593	1.26413	2.66115	2.92852	0.706012	0.800354	1.24683	1.16749	AT1G21530	AMP-binding protein, putative	-1.17269	-0.633531	-2.08682	-2.84269	-1.02272	-0.733555	-0.719443	-1.74435
AT1G22140	hypothetical protein	0.173381	0.0557591	0.233634	0.312345	0.421255	0.288187	0.263281	0.201736	AT1G21110	O-methyltransferase, putative	-1.45016	-1.1779	-0.876166	-0.382698	-0.0339685	0.0381937	0.14815	0.250296	AT1G27300	hypothetical protein	0.243727	0.28797	0.432203	0.46151	0.153377	0.282538	0.226804	0.151379	AT1G21580	hydroxyproline-rich glycoprotein family protein	-0.419114	-0.328075	-0.562293	-0.966833	-0.795852	-0.472205	-0.319283	-0.817686
AT1G22190	AP2 domain-containing transcription factor, putative	0.118119	0.266843	0.498819	0.309367	0.25889	0.0302534	0.0950367	-0.440759	AT1G21200	transcription factor	-0.0725813	-0.146275	-0.181764	-0.235107	0.0595168	-0.038063	-0.153571	0.0848369	AT1G27385	hypothetical protein	0.258602	0.144983	0.346946	0.402991	0.525132	0.176093	0.141516	0.221245	AT1G21630	calcium-binding EF hand family protein	-0.403401	-0.0838964	-0.147263	0.0539465	-0.475114	-0.690646	-0.114913	-0.478633
AT1G22500	zinc finger (C3HC4-type RING finger) family protein	0.483353	0.363259	0.393937	0.369266	0.422539	0.337593	0.130176	0.579841	AT1G21270	WAK2 (wall-associated kinase 2); protein serine/threonine kinase	-0.261697	-0.386642	-0.533693	-1.01306	-0.172441	-0.0686618	-0.413548	-0.249575	AT1G27690	hypothetical protein	0.235718	0.236083	0.199485	0.117278	0.190694	0.153166	-0.000461964	0.153471	AT1G21660	heat shock protein binding	-0.235019	-0.348488	-0.511164	-0.653482	-0.460751	-0.243915	-0.569228	-0.33967
AT1G22510	zinc finger (C3HC4-type RING finger) family protein	0.187954	0.529113	0.759914	0.826197	0.085957	0.0590881	0.0951159	0.242269	AT1G21310	ATEXT3 (EXTENSIN 3); structural constituent of cell wall	-0.461988	-0.231189	-0.362522	-0.173702	-0.0837095	-0.0966127	-0.218197	-0.0613639	AT1G28130	GH37; indole-3-acetic acid amido synthetase	0.404897	0.547926	0.798089	0.777606	0.619812	0.628503	0.769637	0.652685	AT1G21680	hypothetical protein	-0.215074	-0.529356	-0.442117	-0.448154	-0.176415	-0.389753	-0.478157	-0.296139
AT1G22520	hypothetical protein	0.0610821	0.122913	0.239439	-0.0368521	-0.221021	-0.21909	0.0978895	-0.718301	AT1G21460	nodulin MtN3 family protein	-0.285441	-0.546865	-0.499206	-0.275284	0.086521	0.154773	0.263931	0.518774	AT1G28230	PUP1 (PURINE PERMEASE 1); purine transmembrane transporter	0.576158	0.794057	1.27181	1.20548	0.913735	1.03977	0.998939	1.48955	AT1G21730	kinesin-related protein (MKRP1)	-0.140206	-0.255177	-0.531243	-0.776642	-0.299808	-0.141914	-0.249129	-0.261939
AT1G22630	heat shock protein binding / unfolded protein binding	0.257482	0.0128669	0.292746	0.51234	0.343752	0.212583	0.033538	-0.152438	AT1G21570	zinc finger (CCCH-type) family protein	-0.255329	-0.25588	-0.641166	-0.150579	0.23105	0.210387	0.210356	0.585095	AT1G28570	GDSL-motif lipase, putative	0.150192	0.267063	0.621731	0.87987	0.443056	0.427825	0.485406	0.732643	AT1G21760	F-box family protein	-0.132759	-0.230415	-0.124471	-0.287516	-0.212257	-0.133337	-0.26214	-0.193035
AT1G22640	MYB3 (myb domain protein 3); DNA binding / transcription factor	0.362732	0.0774388	0.305919	0.372226	0.0650083	0.0611417	-0.0510226	-0.35376	AT1G21660	heat shock protein binding	-0.235019	-0.348488	-0.511164	-0.653482	-0.460751	-0.243915	-0.569228	-0.33967	AT1G28580	GDSL-motif lipase, putative	0.0423375	0.141033	0.358965	0.489472	0.244112	0.38513	0.435466	0.530656	AT1G21980	ATPIP5K1 (ARABIDOPSIS THALIANA 1-PHOSPHATIDYLINOSITOL-4-PHOSPHATE 5-KINASE 1); 1-phosphatidylinositol-4-phosphate 5-kinase	-0.346155	-0.221788	-0.376775	-0.784738	-0.873254	-0.525443	-0.54454	-0.731804
AT1G22650	beta-fructofuranosidase, putative / invertase, putative / saccharase, putative / beta-fructosidase, putative	0.362418	0.377191	0.714344	0.665939	0.0120702	0.379065	0.503453	0.776915	AT1G21780	BTB/POZ domain-containing protein	-0.05365	-0.193817	-0.188049	-0.419571	-0.193352	-0.0410125	-0.201284	-0.162485	AT1G28700	hypothetical protein	-0.370899	-0.515591	-0.395886	-0.547425	-0.356975	-0.655008	-0.136974	-0.296632	AT1G22020	SHM6 (serine hydroxymethyltransferase 6); glycine hydroxymethyltransferase	-0.0980797	-0.156168	-0.155296	-0.449879	-0.314169	-0.238871	-0.370408	-0.479947
AT1G22660	tRNA-nucleotidyltransferase, putative / tRNA adenylyltransferase, putative	0.08914	0.119909	0.126687	0.186643	-0.0555442	0.0706536	0.148475	0.14351	AT1G21840	UREF (UREASE ACCESSORY PROTEIN F); nickel ion binding	-0.114843	-0.217129	-0.153892	-0.0938638	0.0379253	-0.169936	-0.032357	-0.135285	AT1G28960	ATNUDT15 (ARABIDOPSIS THALIANA NUDIX HYDROLASE HOMOLOG 15); hydrolase	0.137583	0.119564	0.134847	0.0577931	0.2083	0.308956	0.0686985	0.348045	AT1G22070	TGA3 (TGA1a-related gene 3); DNA binding / calmodulin binding / transcription factor	-0.264538	-0.241948	-0.0730082	-0.224674	-0.305261	-0.313186	-0.294526	-0.360953
AT1G22680	hypothetical protein	0.897117	0.613194	0.878566	0.40339	0.484511	0.589137	0.274931	0.780309	AT1G22030	hypothetical protein	-0.549611	-0.661276	-1.09017	-1.41347	-0.0625001	-0.634072	-0.445325	-0.858502	AT1G29020	calcium-binding EF hand family protein	0.63177	0.7929	1.11942	1.02713	0.399384	0.434994	0.594946	0.126603	AT1G22110	structural constituent of ribosome	-0.452466	-0.700905	-0.390474	-0.516706	-0.469762	-0.721075	-0.50434	-0.463126
AT1G22850	hypothetical protein	0.0902334	0.143873	0.186154	0.167005	0.119359	-0.043874	-0.027018	-0.325099	AT1G22550	proton-dependent oligopeptide transport (POT) family protein	-0.358873	-0.639686	-0.581229	-0.61512	0.030132	-0.000768176	-0.199358	-0.244349	AT1G29040	hypothetical protein	0.550404	0.653457	0.721957	0.419833	0.190662	0.351871	0.450878	0.480011	AT1G22220	F-box family protein	-0.354366	-0.261189	-0.238717	-0.634082	-0.67572	-0.888669	-0.840276	-1.16582
AT1G23040	hydroxyproline-rich glycoprotein family protein	0.168214	-0.0254426	0.172768	-0.00564725	-0.171685	0.0867975	-0.285452	-0.226468	AT1G22670	protease-associated zinc finger (C3HC4-type RING finger) family protein	-0.336768	-0.363561	-0.366483	-0.355197	-0.344353	-0.187013	-0.160396	-0.284109	AT1G29195	hypothetical protein	0.408308	0.484068	0.849217	1.04471	0.343325	0.423419	0.396606	0.493562	AT1G22230	hypothetical protein	-0.321288	-0.3377	-0.492003	-0.964081	-0.558637	-0.353916	-0.557176	-0.6093
AT1G23180	armadillo/beta-catenin repeat family protein	0.495769	0.391529	0.200415	0.206166	0.0237181	0.290517	0.172952	0.478139	AT1G22740	RAB7 (Ras-related protein 7); GTP binding	-0.112507	-0.205484	-0.38705	-0.635562	-0.0523131	-0.051699	-0.213521	-0.66353	AT1G29240	hypothetical protein	0.53642	0.514282	0.603634	0.401993	0.383231	0.513568	0.350554	0.556163	AT1G22330	RNA binding	-0.680313	-0.204155	-0.642522	-0.86902	-0.565584	-0.741232	-0.571824	-1.32661
AT1G23190	phosphoglucomutase, cytoplasmic, putative / glucose phosphomutase, putative	0.389331	0.395113	0.441747	0.462987	0.0852631	0.347458	0.30058	0.472138	AT1G22890	hypothetical protein	-0.610603	-0.569945	-0.381706	-0.56438	-0.00292416	-0.180358	-0.293905	-0.551633	AT1G29410	PAI3 (PHOSPHORIBOSYLANTHRANILATE ISOMERASE 3); phosphoribosylanthranilate isomerase	0.105177	0.079175	0.213625	0.215787	0.158664	0.272591	0.402068	0.496434	AT1G22530	PATL2; transporter	-0.617186	-0.54726	-0.650131	-0.861911	-0.879943	-0.877425	-0.741407	-1.30346
AT1G23200	pectinesterase family protein	0.42612	0.396405	0.567237	0.29398	0.409794	0.0272825	0.208721	-0.179094	AT1G22930	T-complex protein 11	-0.0837744	-0.266381	-0.513717	-0.8754	-0.696617	-0.0489386	-0.670456	0.0971871	AT1G29670	GDSL-motif lipase/hydrolase family protein	0.368947	0.525392	0.856614	0.781247	0.704965	0.659601	0.462669	0.783142	AT1G22590	AGL87; transcription factor	-0.0692906	-0.304732	-0.333249	-0.536302	-0.353738	-0.325132	-0.463744	-0.591006
AT1G23205	invertase/pectin methylesterase inhibitor family protein	0.535477	0.542015	0.378472	0.115906	-0.0610079	0.27686	0.0993082	0.000859388	AT1G23120	major latex protein-related / MLP-related	-0.509008	-0.61944	-0.346361	-0.330876	-0.024431	-0.0343489	-0.215971	-0.145728	AT1G29790	hypothetical protein	0.174762	0.312747	0.521723	0.962922	0.459621	0.195725	0.478307	0.261996	AT1G22610	C2 domain-containing protein	-0.209357	-0.17777	-0.136075	-0.410343	-0.460959	-0.361959	-0.515218	-0.510059
AT1G23220	dynein light chain type 1 family protein	0.241884	0.209279	0.28764	0.258796	0.177658	0.0998702	0.205555	0.00790818	AT1G23310	GGT1 (ALANINE-2-OXOGLUTARATE AMINOTRANSFERASE 1)	-0.143594	-0.142593	-0.162132	-0.196589	0.0854852	-0.114303	-0.155156	-0.185847	AT1G29860	WRKY71 (WRKY DNA-binding protein 71); transcription factor	0.828672	0.717245	0.831287	0.73318	0.454433	0.588548	0.568422	1.05671	AT1G22770	GI (GIGANTEA); binding	-0.604501	-0.554457	-0.684141	-0.878912	-0.818183	-1.09352	-0.936017	-0.941892
AT1G23260	MMZ1/UEV1A (MMS ZWEI HOMOLOGE 1); protein binding / ubiquitin-protein ligase	0.209602	0.112965	0.21251	0.303081	0.221653	0.137037	0.141775	0.218465	AT1G23340	hypothetical protein	-0.588768	-0.354949	-0.622733	-0.45727	0.217997	-0.680977	-0.0573177	-1.2937	AT1G29960	AGL64; peptidase	0.260702	0.246297	0.378592	0.395224	0.281904	0.308152	0.287108	0.282566	AT1G22880	ATCEL5/ATGH9B4 (ARABIDOPSIS THALIANA GLYCOSYL HYDROLASE 9B4); hydrolase, hydrolyzing O-glycosyl compounds	-0.714859	-0.483274	-1.33565	-1.92948	-0.691271	-0.796582	-0.760864	-1.06013
AT1G23470	pseudo	0.154447	0.187918	0.217248	0.460253	0.581512	0.119243	0.297248	0.400866	AT1G23400	ATCAF2/CAF2 (ARABIDOPSIS THALIANA HOMOLOG OF MAIZE CAF2)	-0.142948	-0.187786	-0.246248	-0.279038	0.0809271	-0.00573155	-0.0836093	0.0863755	AT1G30220	ATINT2 (INOSITOL TRANSPORTER 2); carbohydrate transmembrane transporter/ sugar:hydrogen ion symporter	1.06255	0.858424	1.56619	1.62192	2.79575	2.47641	2.31945	2.38411	AT1G22980	hypothetical protein	-0.533189	-0.592372	-0.920141	-1.2826	-0.234335	-0.505224	-0.30475	-0.425475
AT1G23890	NHL repeat-containing protein	0.207308	0.199358	0.174115	0.544702	0.344248	0.19361	0.21209	0.423686	AT1G23480	ATCSLA03 (Cellulose synthase-like A3); transferase, transferring glycosyl groups	-0.263634	-0.197626	-0.271114	-0.135775	0.188111	-0.222706	-0.235225	-0.168136	AT1G30270	CIPK23 (CBL-INTERACTING PROTEIN KINASE 23); kinase	0.243753	0.578452	0.559503	0.456257	0.111261	0.393106	0.556694	0.512622	AT1G23010	LPR1 (LOW PHOSPHATE ROOT1); copper ion binding / oxidoreductase, acting on diphenols and related substances as donors, oxygen as acceptor	-0.486894	-0.585921	-0.562717	-0.576892	-0.353583	-0.526176	-0.772228	-0.256462
AT1G24020	MLP423 (MLP-LIKE PROTEIN 423)	0.443263	0.552001	0.867986	0.65776	0.042801	0.0504148	0.176377	0.277616	AT1G23530	hypothetical protein	-0.276892	-0.316513	-0.467168	-0.596249	0.00809049	-0.0136188	-0.123608	-0.34121	AT1G30300	hypothetical protein	0.122149	0.113397	0.133852	0.187579	0.0868204	0.18199	0.186876	0.184665	AT1G23090	AST91 (SULFATE TRANSPORTER 91); sulfate transmembrane transporter	-0.518515	-0.450571	-0.30532	-0.443427	-0.759291	-0.82173	-0.490852	-1.3645
AT1G24210	paired amphipathic helix repeat-containing protein	0.271636	0.130024	0.328118	0.4434	0.252959	0.0656223	0.0538013	0.384964	AT1G23590	hypothetical protein	-0.238702	-0.272772	-0.245891	-0.241208	-0.208866	-0.30721	-0.288374	-0.190755	AT1G30310	pseudo	0.680465	1.17212	1.61411	2.27618	2.54664	2.50921	2.26818	4.27921	AT1G23130	Bet v I allergen family protein	-0.259251	-0.51198	-0.75609	-1.04314	-0.305573	-0.313567	-0.571837	-0.789737
AT1G24270	hypothetical protein	0.907902	1.83248	2.67597	2.06552	-0.473609	0.814832	1.06663	1.12694	AT1G23840	hypothetical protein	-0.437336	-0.317978	-0.390383	-0.786593	0.615703	1.90064	1.49314	1.87594	AT1G30475	hypothetical protein	0.453406	0.41233	0.734038	0.967247	0.313453	0.348084	0.238797	0.41463	AT1G23150	hypothetical protein	-0.327972	-0.108529	-0.256704	-0.22486	-0.299942	-0.9298	-0.692121	-1.08325
AT1G24280	G6PD3 (GLUCOSE-6-PHOSPHATE DEHYDROGENASE 3); glucose-6-phosphate dehydrogenase	0.176968	0.596807	0.590154	0.511818	-0.327765	0.0421038	0.05798	-0.050777	AT1G23850	hypothetical protein	-1.20243	-1.04745	-0.786356	-0.528163	-0.136989	-0.572278	-0.554155	-0.122588	AT1G30500	CCAAT-binding transcription factor (CBF-B/NF-YA) family protein	0.189009	0.133062	0.44784	0.554025	0.625353	0.936189	0.933893	1.07941	AT1G23440	pyrrolidone-carboxylate peptidase family protein	-0.181052	-0.247445	-0.0432173	-0.118311	-0.348265	-0.282079	-0.555861	-0.591817
AT1G24320	alpha-glucosidase, putative	0.541173	0.327178	0.530359	0.592952	0.322512	0.425719	0.141241	0.80633	AT1G23870	ATTPS9 (Arabidopsis thaliana trehalose-phosphatase/synthase 9); transferase, transferring glycosyl groups / trehalose-phosphatase	-0.263732	-0.224709	-0.30174	-0.653789	-0.457146	-0.0703127	-0.492865	-0.328305	AT1G30510	ATRFNR2 (ROOT FNR 2); oxidoreductase	0.683557	0.789162	0.9498	1.02862	0.369282	0.716712	0.681491	0.675381	AT1G23900	GAMMA-ADAPTIN 1; clathrin binding	-0.0985406	-0.204252	-0.332355	-0.430777	-0.221314	-0.156906	-0.323024	-0.343571
AT1G24350	catalytic	0.120884	0.0822337	0.290847	0.2762	-0.0508825	-0.00372667	-0.110645	-0.0898689	AT1G24160	hypothetical protein	-0.223207	-0.306624	-0.356894	-0.413873	-0.304439	-0.115698	-0.336396	-0.118094	AT1G30550	hypothetical protein	0.361055	0.29103	0.267186	0.32047	0.411846	0.411562	0.213966	0.295395	AT1G23970	hypothetical protein	-0.333554	-0.526102	-0.547022	-0.697892	-0.0669794	-0.517683	-0.759286	-0.660945
AT1G24735	caffeoyl-CoA 3-O-methyltransferase, putative	0.329272	0.39154	0.352323	0.329451	0.0448782	0.656262	0.46927	0.307183	AT1G24300	GYF domain-containing protein	-0.449373	-0.441143	-0.71551	-0.166386	-0.222167	-0.0803121	-0.176783	-0.691112	AT1G30560	transporter, putative	1.8774	1.66147	2.00814	1.84269	1.90436	1.97923	1.53001	1.75687	AT1G24100	UGT74B1 (UDP-glucosyl transferase 74B1); UDP-glycosyltransferase/ thiohydroximate beta-D-glucosyltransferase/ transferase, transferring glycosyl groups	-0.324616	-0.177588	-0.106497	-0.118901	-0.158547	-0.200389	-0.217764	-0.155107
AT1G25375	metallo-beta-lactamase family protein	0.32541	0.212815	0.319206	0.310268	0.110608	0.162914	0.0410822	0.35246	AT1G24390	hypothetical protein	-0.0701273	-0.0907768	-0.108005	-0.119669	-0.130939	-0.137163	-0.0427184	-0.0914249	AT1G30760	FAD-binding domain-containing protein	0.713253	0.650014	1.16651	1.06533	0.44547	1.78362	1.93686	2.57844	AT1G24260	SEP3 (SEPALLATA3); transcription factor	-1.27006	-2.05534	-2.309	-2.92181	-1.09963	-2.19116	-2.45154	-3.56401
AT1G25420	hypothetical protein	0.162956	0.113345	0.0848283	0.151529	0.0831558	-0.00648014	0.0131762	0.0456794	AT1G24480	methyltransferase	-0.340162	-0.371621	-0.729909	-1.24339	0.245664	0.307856	-0.0803044	-0.216705	AT1G31170	ATSRX/SRX (SULFIREDOXIN); DNA binding / oxidoreductase, acting on sulfur group of donors	-0.0403016	0.00102354	0.225944	0.247604	0.151273	0.0453473	0.0104207	0.181229	AT1G24340	EMB2421 (EMBRYO DEFECTIVE 2421); monooxygenase	-0.269099	-0.267408	-0.268301	-0.454996	-0.464286	-0.540326	-0.618521	-0.642488
AT1G25440	zinc finger (B-box type) family protein	0.6383	0.325584	0.237078	-0.0901018	0.0976256	0.378685	0.296029	0.542037	AT1G24540	CYP86C1 (cytochrome P450, family 86, subfamily C, polypeptide 1); oxygen binding	-0.423266	-1.34963	-2.07097	-2.21432	-0.360981	0.0729515	-1.73965	0.551937	AT1G31173	misc_RNA	0.221889	0.482125	0.6171	1.05212	1.27231	0.884305	1.79446	0.64284	AT1G24485	hypothetical protein	-0.855757	-1.4681	-2.94572	-2.7543	-0.906507	-0.688823	-1.17711	-1.0736
AT1G25450	very-long-chain fatty acid condensing enzyme, putative	0.190998	0.21709	0.332005	0.297064	0.0534132	0.0705021	0.0403776	0.0906154	AT1G24792	pseudo	-0.421682	-0.511752	-0.992519	-1.03863	0.353343	0.483989	0.921015	0.59978	AT1G31190	inositol monophosphatase family protein	0.303247	0.221035	0.243021	0.196497	0.233045	0.28566	0.201135	0.395746	AT1G24530	transducin family protein / WD-40 repeat family protein	-0.837255	-0.770477	-0.745345	-0.549929	-0.442719	-0.890308	-0.769479	-0.800026
AT1G25570	leucine-rich repeat protein-related	0.102253	0.209184	0.208561	0.164369	-0.117055	-0.0455815	-0.0284094	0.0292428	AT1G24825	miscRNA	-0.314386	-0.251504	-0.539877	-0.435194	-0.109678	0.0146564	0.0314362	-0.0806868	AT1G31460	hypothetical protein	0.305279	0.371391	0.391991	0.476497	0.506345	0.360293	0.38896	0.458475	AT1G24560	hypothetical protein	-0.189506	-0.130251	-0.21296	-0.345003	-0.458064	-0.190923	-0.249818	-0.317408
AT1G26470	hypothetical protein	0.147419	0.123313	0.16099	0.161034	-0.0259333	0.162785	0.357952	0.223871	AT1G24880	UDP-3-O-[3-hydroxymyristoyl] N-acetylglucosamine deacetylase	-0.121692	-0.10544	-0.332273	-0.331271	0.153116	0.144199	0.296949	0.168614	AT1G31550	GDSL-motif lipase, putative	0.484133	0.426077	1.19725	1.22594	0.59742	0.614526	0.402229	0.767786	AT1G24575	hypothetical protein	-0.978333	-1.39997	-1.25419	-1.53452	-1.002	-0.938876	-1.74003	-1.72353
AT1G26570	ATUGD1/UGD1 (UDP-glucose dehydrogenase 1); UDP-glucose 6-dehydrogenase	0.232205	0.393543	0.523924	0.506709	0.127664	-0.117858	-0.194228	-0.0382108	AT1G24909	anthranilate synthase beta subunit, putative	-0.675385	-0.589781	-0.38905	-0.126395	-0.382806	-0.198985	-0.173063	0.297315	AT1G31600	oxidoreductase, 2OG-Fe(II) oxygenase family protein	0.720044	0.937281	1.26149	1.54586	0.96948	1.02881	1.45161	1.57685	AT1G25025	hypothetical protein	-0.557821	-0.29694	-0.564686	-0.45301	-1.06435	-0.759685	-0.344515	-0.972975
AT1G26660	c-myc binding protein, putative / prefoldin, putative	0.236291	0.291974	0.352931	0.460682	-0.00925977	0.217537	0.284849	0.435904	AT1G25054	hypothetical protein	-0.126437	-0.104014	-0.334432	-0.195538	0.268992	0.195448	0.384341	0.315229	AT1G31670	copper amine oxidase, putative	1.74215	1.19973	1.30043	2.24826	1.79443	1.90441	1.4198	2.89855	AT1G25320	leucine-rich repeat transmembrane protein kinase, putative	-0.101184	-0.178186	-0.271137	-0.742406	-0.344836	-0.195768	-0.289646	-0.459681
AT1G26670	ATVTI12/VTI12/VTI1B (VESICAL TRANSPORT V-SNARE 12); SNARE binding / receptor/ soluble NSF attachment protein	0.106736	0.0404458	0.266034	0.281764	0.280385	0.13959	0.0153878	0.00873982	AT1G25083	anthranilate synthase beta subunit, putative	-0.28885	-0.343036	-0.193493	-0.16603	-0.416028	-0.205186	-0.230091	-0.00645557	AT1G31690	copper ion binding	1.55196	1.28039	1.27363	1.11514	0.582793	1.28313	1.12646	1.63394	AT1G25430	pseudo	-0.208842	-0.662953	-1.14328	-1.89738	-0.858259	-1.49919	-1.75805	-1.8896
AT1G26850	dehydration-responsive family protein	0.160736	0.0969818	0.146363	-0.175598	-0.497243	-0.154748	-0.324399	-0.0994203	AT1G25230	purple acid phosphatase family protein	-0.0212879	-0.170035	-0.268457	-0.372124	0.215029	0.232772	0.0657503	0.0780358	AT1G32260	hypothetical protein	0.0458389	0.17443	0.334213	0.362225	0.127318	0.0134645	0.167431	-0.223046	AT1G25490	RCN1 (ROOTS CURL IN NPA); protein phosphatase type 2A regulator	-0.136229	-0.0967865	-0.102832	-0.237711	-0.144709	-0.304613	-0.171312	-0.485187
AT1G26945	transcription regulator	0.683496	0.201823	0.333565	0.286008	-0.76136	-0.181007	-0.588138	-0.14723	AT1G25260	acidic ribosomal protein P0-related	-0.212078	-0.191584	-0.23162	-0.268864	-0.285101	-0.264884	0.0109123	-0.400272	AT1G32310	hypothetical protein	0.263483	0.206543	0.412367	0.634482	0.279113	0.128717	0.215749	0.140864	AT1G26110	hypothetical protein	-0.0462318	-0.0557034	-0.236803	0.0700187	0.334268	0.194134	0.166834	0.500117
AT1G27330	hypothetical protein	0.193063	0.252889	0.275249	0.0796726	-0.165399	0.0549888	0.0805784	-0.183849	AT1G25400	hypothetical protein	-0.971169	-0.834054	-0.759657	-1.0655	-0.053116	-0.50419	-0.657757	-0.787207	AT1G32560	late embryogenesis abundant group 1 domain-containing protein / LEA group 1 domain-containing protein	2.01173	2.5109	1.7502	3.25138	1.85303	1.93134	2.17702	2.70961	AT1G26150	protein kinase	-0.335342	-0.32908	-0.557965	-0.64678	-0.37722	-0.607566	-0.666554	-0.921069
AT1G27340	F-box family protein	0.0549917	0.102175	0.193821	0.383076	-0.00950114	-0.128431	0.0221948	0.0997049	AT1G25480	hypothetical protein	-0.177937	-0.432178	-0.607757	-0.558106	-0.0478047	-0.244468	-0.350275	-0.352438	AT1G32640	ATMYC2 (JASMONATE INSENSITIVE 1); DNA binding / transcription factor	0.33011	0.210358	0.903715	0.947365	0.338263	0.831593	0.471739	0.894573	AT1G26200	pseudo	-1.12661	-1.27643	-1.88023	-2.47686	-1.06228	-1.17997	-1.59702	-1.94474
AT1G27350	hypothetical protein	0.0755134	0.152398	0.216332	0.0988693	-0.0996472	0.0164615	0.0618557	-0.100521	AT1G25560	AP2 domain-containing transcription factor, putative	-0.872389	-0.383657	-0.294657	-0.202934	0.0995553	-0.890466	-0.0120178	-1.77136	AT1G32920	hypothetical protein	0.349382	0.505772	0.951436	1.28056	0.526542	0.129389	0.22106	0.16012	AT1G26208	miscRNA	0.112334	-0.232136	0.0512148	-0.821176	-0.157076	0.030096	0.0902224	-1.18759
AT1G27410	DNA cross-link repair protein-related	0.145402	0.114035	0.148761	0.368632	0.229034	0.0782217	0.172365	0.370191	AT1G26110	hypothetical protein	-0.0462318	-0.0557034	-0.236803	0.0700187	0.334268	0.194134	0.166834	0.500117	AT1G33102	hypothetical protein	0.253862	0.505292	1.29832	1.84633	0.587254	0.314709	0.42206	0.244431	AT1G26250	proline-rich extensin, putative	-1.7574	-2.30145	-2.67341	-2.91645	-2.9903	-3.86043	-4.4964	-4.47153
AT1G27690	hypothetical protein	0.235718	0.236083	0.199485	0.117278	0.190694	0.153166	-0.000461964	0.153471	AT1G26210	hypothetical protein	-0.596618	-0.45383	-0.620745	-0.754884	-0.0079833	-0.757529	-0.644251	-0.850781	AT1G33265	hypothetical protein	0.454537	0.395714	0.577301	0.358119	0.107926	0.364004	0.618446	0.354487	AT1G26310	CAL (CAULIFLOWER); DNA binding / transcription factor	-0.39242	-0.910547	-1.57248	-2.92009	-1.0006	-0.919474	-1.46089	-2.9093
AT1G27840	ATCSA-1; nucleotide binding	0.184125	0.188071	0.401273	0.318801	-0.175361	-0.201655	-0.213358	-0.335048	AT1G26230	chaperonin, putative	-0.211979	-0.374451	-0.635743	-0.889893	0.111474	0.162478	-0.0852125	0.0557821	AT1G33480	protein binding / zinc ion binding	0.714964	0.575944	0.496273	0.318646	0.719054	0.832638	0.72307	0.814226	AT1G26380	FAD-binding domain-containing protein	-3.55684	-3.41317	-4.24135	-4.18539	-2.25456	-1.64097	-0.905275	-0.307757
AT1G27940	PGP13 (P-GLYCOPROTEIN 13); ATPase, coupled to transmembrane movement of substances	0.804275	0.72611	0.926284	1.02287	0.390183	0.161312	-0.224458	0.217489	AT1G26270	phosphatidylinositol 3- and 4-kinase family protein	-0.337198	-0.447455	-0.749178	-0.87174	-0.244296	-0.0589279	-0.0458211	0.0369158	AT1G33490	hypothetical protein	0.301169	0.27106	0.575421	0.948873	0.564214	0.395495	0.284676	0.478518	AT1G26390	FAD-binding domain-containing protein	-4.5897	-3.19816	-3.10756	-3.98639	-1.5429	-1.00966	-0.354728	-1.21178
AT1G27950	lipid transfer protein-related	0.522783	0.614634	0.955989	0.774891	-0.133444	0.215242	0.254715	0.292806	AT1G26360	hydrolase, alpha/beta fold family protein	0.057062	-0.531259	-1.36025	-2.39494	0.187863	0.235542	-0.507816	-0.585122	AT1G34580	monosaccharide transporter, putative	1.08522	1.25346	1.65953	2.23923	1.20308	1.10242	1.48334	1.91921	AT1G26700	MLO14 (MILDEW RESISTANCE LOCUS O 14); calmodulin binding	-0.0710472	-0.160833	-1.07408	-1.5464	-0.740964	-0.65308	-1.11734	-2.18497
AT1G27990	hypothetical protein	-0.467891	-0.683146	-0.46464	-0.607577	-0.533818	-0.868557	-0.651085	-0.405762	AT1G26380	FAD-binding domain-containing protein	-3.55684	-3.41317	-4.24135	-4.18539	-2.25456	-1.64097	-0.905275	-0.307757	AT1G34640	hypothetical protein	0.586706	0.261138	0.504024	0.648118	0.249556	0.395892	0.431907	0.352935	AT1G26750	hypothetical protein	-0.0877776	-0.0937028	-0.170384	-0.373714	-0.282867	-0.230917	-0.167739	-0.321618
AT1G28140	hypothetical protein	0.128009	0.149942	0.272191	0.416312	0.471867	0.218937	0.148845	0.228038	AT1G26410	FAD-binding domain-containing protein	-5.28663	-4.10138	-3.57794	-3.90948	-3.14546	-1.93436	-0.970919	-0.181338	AT1G34770	MAGE-8 antigen-related	0.207476	0.228807	0.0792519	0.170709	0.358949	0.36135	0.502333	0.715715	AT1G26870	ANAC009 (Arabidopsis NAC domain containing protein 9); transcription factor	-0.673092	-0.538238	-1.37621	-1.94442	-0.71258	-0.777904	-0.535429	-1.30686
AT1G28150	hypothetical protein	0.104635	0.159315	0.21795	0.267103	0.261542	0.0932067	0.275969	-0.00669725	AT1G26440	ATUPS5 (ARABIDOPSIS THALIANA UREIDE PERMEASE 5)	-0.292997	-0.349514	-0.489439	-0.526115	0.147853	0.0727337	0.0559597	0.0610802	AT1G35230	AGP5 (ARABINOGALACTAN-PROTEIN 5)	0.188138	0.875431	1.01763	1.72254	0.29756	1.36957	1.23144	2.25476	AT1G26960	ATHB23 (ARABIDOPSIS THALIANA HOMEOBOX PROTEIN 23); DNA binding / transcription factor	-0.123789	-0.218938	-0.446474	-0.543841	-0.267089	-0.305424	-0.450721	-0.701804
AT1G28340	leucine-rich repeat family protein	0.128588	0.16631	0.174799	0.393523	0.122457	-0.0164756	0.0715462	0.118181	AT1G26580	hypothetical protein	-0.41332	-0.316491	-0.66263	-0.445774	-0.0507634	-0.0425999	0.086092	0.0408132	AT1G35310	MLP168 (MLP-LIKE PROTEIN 168)	1.0944	1.29794	2.07633	2.08064	0.535428	0.686524	0.276326	0.848641	AT1G27020	hypothetical protein	-1.32528	-1.86301	-2.23391	-1.99675	-1.2189	-1.36871	-1.39698	-1.19848
AT1G28395	hypothetical protein	0.0993485	0.0422835	0.0768601	0.149033	-0.168532	-0.0985454	0.223032	0.0124596	AT1G26665	hypothetical protein	-0.111453	-0.037233	-0.0412497	0.060122	0.314745	0.0764713	0.0574113	0.0348613	AT1G35420	dienelactone hydrolase family protein	0.304202	0.0859955	0.270875	0.273529	0.143006	0.270548	0.219503	0.320725	AT1G27130	ATGSTU13 (GLUTATHIONE S-TRANSFERASE 12); glutathione transferase	-0.104234	-0.413239	-0.389487	-0.732415	-0.421102	-0.449576	-0.703682	-0.586836
AT1G28400	hypothetical protein	0.0860229	0.212426	0.178759	0.140374	-0.00433017	-0.225549	-0.0817717	-0.292438	AT1G26680	transcriptional factor B3 family protein	-0.184323	-0.184462	-0.292756	-0.93469	-0.223027	-0.199337	-0.0927776	-0.472862	AT1G35460	basic helix-loop-helix (bHLH) family protein	0.518397	0.562384	0.793237	0.565301	0.271831	0.489774	0.467762	0.294982	AT1G27360	squamosa promoter-binding protein-like 11 (SPL11)	-0.0510907	-0.398884	-0.610398	-0.886052	-0.200879	-0.16333	-0.376165	-0.425282
AT1G28480	GRX480; thiol-disulfide exchange intermediate	0.133097	0.310093	0.961689	1.85818	-0.182048	1.38674	0.508094	2.46641	AT1G26761	hypothetical protein	-0.390826	-0.563083	-0.715324	-0.68534	-0.0951703	-0.537513	-0.55268	-0.444084	AT1G35720	ANNAT1 (ANNEXIN ARABIDOPSIS 1); calcium ion binding / calcium-dependent phospholipid binding	0.0682926	0.19789	0.294389	0.216431	0.303085	0.289534	0.243005	0.254798	AT1G27460	NPGR1 (NO POLLEN GERMINATION RELATED 1); calmodulin binding	-0.136022	-0.0833885	-0.308484	-0.521816	-0.267047	-0.370859	-0.237009	-0.594372
AT1G28540	hypothetical protein	0.208081	0.246027	0.449577	0.143859	-0.230265	-0.00786398	-0.0487955	-0.278849	AT1G26830	ATCUL3/ATCUL3A/CUL3/CUL3A (Cullin 3A); protein binding / ubiquitin-protein ligase	-0.0961323	-0.0835418	-0.21326	-0.491858	-0.212598	-0.021428	-0.193662	-0.0716345	AT1G43560	ATY2 (Arabidopsis thioredoxin y2); thiol-disulfide exchange intermediate	0.515359	0.552594	0.785562	0.973408	0.542138	0.32957	0.274858	0.577953	AT1G27560	pseudo	-0.369021	-0.422831	-0.35466	-0.386893	-0.363239	-0.467552	-0.425248	-0.332134
AT1G28600	lipase, putative	0.0359107	0.473838	0.900567	1.27361	-0.0494215	-0.36696	-0.26768	-0.247531	AT1G27050	ATHB54 (ARABIDOPSIS THALIANA HOMEOBOX PROTEIN 54); nucleic acid binding / transcription factor	-0.212411	-0.550243	-0.219136	-0.662853	0.348186	0.141697	-0.700273	-1.35679	AT1G45010	hypothetical protein	0.970069	0.845069	1.31533	1.42341	0.493643	0.549204	0.526314	0.509234	AT1G27595	hypothetical protein	-0.0984007	-0.129343	-0.288483	-0.429611	-0.268421	-0.145027	-0.283912	-0.43573
AT1G28710	hypothetical protein	0.53637	0.553727	0.125507	0.086068	-0.696723	0.165937	0.470122	0.10018	AT1G27110	binding	-0.392368	-0.568072	-0.945643	-0.963796	-0.292797	-0.0590621	-0.321901	-0.239581	AT1G45130	BGAL5 (beta-galactosidase 5); beta-galactosidase	0.319668	0.281491	0.188132	0.118982	0.266791	0.284047	0.20336	0.440678	AT1G27960	ECT9 (evolutionarily conserved C-terminal region 9)	-0.224212	-0.157555	-0.369398	-0.591869	-0.59725	-0.255682	-0.265766	-0.373526
AT1G28815	hypothetical protein	0.424989	0.220915	0.468663	0.379355	0.271028	0.663476	0.0419459	0.421728	AT1G27140	ATGSTU14 (GLUTATHIONE S-TRANSFERASE 13); glutathione transferase	-0.0839219	-0.471464	-1.06216	-0.92181	0.196118	0.818939	0.755876	0.27423	AT1G45191	glycosyl hydrolase family 1 protein	0.771191	0.829639	1.76486	2.39823	1.27578	0.824876	0.868052	1.40121	AT1G28020	pentatricopeptide (PPR) repeat-containing protein	-0.522076	-0.568754	-0.598555	-0.545428	-0.605168	-0.606713	-0.614449	-0.525743
AT1G29060	hypothetical protein	0.0586988	0.0287081	0.15455	0.245248	0.285466	0.0779851	0.0642194	0.105287	AT1G27240	paired amphipathic helix repeat-containing protein	-2.54434	-2.51977	-2.51373	-2.51137	-1.80387	-0.268151	-2.515	-2.46635	AT1G45201	hypothetical protein	0.354387	0.359888	0.81661	0.503916	0.0685605	0.184699	-0.000224968	0.0606712	AT1G28040	protein binding / zinc ion binding	-1.15546	-2.3468	-3.98046	-5.33203	-3.48636	-3.59072	-4.94757	-5.44385
AT1G29250	nucleic acid binding	0.129143	0.0927288	0.167787	0.143459	0.0158975	-0.0196304	0.200372	-0.0584355	AT1G27370	squamosa promoter-binding protein-like 10 (SPL10)	-0.195626	-0.227444	-0.414598	-0.470401	-0.0956067	-0.169773	-0.037808	-0.261563	AT1G45249	ABF2 (ABSCISIC ACID RESPONSIVE ELEMENTS-BINDING FACTOR 2)	0.202738	0.15264	0.165973	0.385309	0.227816	0.382562	0.396858	0.656538	AT1G28170	sulfotransferase family protein	-1.54933	-1.4315	-2.98444	-3.65255	-1.67836	-2.2331	-1.80708	-3.72625
AT1G29390	COR314-TM2 (cold regulated 314 thylakoid membrane 2)	0.0562569	0.170252	0.425273	0.27611	0.391902	0.212717	0.250968	-0.0867732	AT1G27440	GUT2; catalytic	-0.15094	-0.160991	-0.333194	-0.439485	0.301624	0.0542825	0.165248	-0.0884731	AT1G47250	PAF2 (20S proteasome alpha subunit F2); peptidase	0.30284	0.321	0.383704	0.295356	0.0751325	0.20646	0.261227	0.230342	AT1G28320	DEG15; endopeptidase	-0.218454	-0.174617	-0.23178	-0.471362	-0.293541	-0.306359	-0.284628	-0.522258
AT1G29430	auxin-responsive family protein	1.28762	0.99853	1.15223	1.06214	0.175454	0.224875	-0.254308	0.337605	AT1G27500	kinesin light chain-related	-0.0592057	-0.176794	-0.518286	-0.961087	-0.423912	0.0133231	-0.0472998	0.0650055	AT1G47420	hypothetical protein	0.0943276	0.0957235	0.184413	0.3287	0.220946	0.188104	0.224519	0.415284	AT1G28330	DRM1 (DORMANCY-ASSOCIATED PROTEIN 1)	-0.626457	-0.431542	-0.327869	-0.37479	0.20717	-0.358676	-0.0902744	-1.0055
AT1G29440	hypothetical protein	0.957472	0.955632	1.10215	1.07212	0.03496	0.132374	-0.0572649	0.108102	AT1G27520	glycoside hydrolase family 47 protein	-0.109795	-0.126057	-0.34217	-0.225439	-0.0563175	-0.108351	0.0789619	-0.0141685	AT1G47565	pseudo	0.430101	0.335491	0.563868	0.583356	0.512447	0.564758	0.401528	0.77353	AT1G29050	hypothetical protein	-0.218923	-0.432976	-0.519317	-0.813345	-0.364638	-0.313811	-0.568216	-0.542991
AT1G29450	auxin-responsive protein, putative	1.2725	1.18813	1.41938	1.29761	-0.09901	0.168875	-0.15828	-0.205414	AT1G27540	F-box family protein	-0.100546	-0.104754	-0.114615	-0.327995	-0.172813	-0.0359021	-0.142528	-0.0948879	AT1G47710	(ATSERPIN1); cysteine protease inhibitor/ serine-type endopeptidase inhibitor	0.333859	0.339903	0.539713	0.705103	0.328043	0.303525	0.323687	0.64208	AT1G29180	DC1 domain-containing protein	-0.185186	-0.129961	-0.263038	-0.296551	-0.432647	-0.508845	-0.661907	-0.434065
AT1G29460	auxin-responsive protein, putative	1.28695	1.0445	1.1378	0.756447	0.125972	0.432105	-0.015706	-0.000832005	AT1G27590	hypothetical protein	-0.24165	-0.494681	-0.442147	-0.729554	0.135643	0.259639	0.264777	0.342496	AT1G47750	PEX11A	0.153202	0.213998	0.423581	0.555317	0.250102	0.130385	0.11858	0.108597	AT1G29370	kinase-related	-0.924503	-0.278194	-0.246096	-0.452879	-0.807979	-1.16357	-0.318964	-1.77587
AT1G29500	auxin-responsive protein, putative	0.862526	0.848	0.876412	0.650114	0.0745215	0.051005	-0.417276	-0.263046	AT1G27650	ATU2AF35A; RNA binding	-0.265713	-0.127348	-0.131536	-0.136275	-0.474658	-0.27914	-0.135379	-0.184723	AT1G47760	AGL102; DNA binding / transcription factor	0.789792	0.63419	0.608352	0.350434	0.303968	0.483503	0.385159	0.624101	AT1G29540	hypothetical protein	-0.382811	-0.799245	-0.982691	-1.44191	-0.534843	-0.549104	-1.1859	-1.35775
AT1G29510	SAUR68 (SMALL AUXIN UPREGULATED 68)	0.822035	0.816525	0.871715	0.763214	0.0302675	0.180662	-0.186966	-0.156722	AT1G27740	basic helix-loop-helix (bHLH) family protein	-0.357802	-0.948019	-1.31787	-1.39237	-0.455847	-0.0488021	-0.794057	-0.736132	AT1G47960	C/VIF1 (CELL WALL / VACUOLAR INHIBITOR OF FRUCTOSIDASE 1); pectinesterase inhibitor	1.78807	1.68169	1.69923	2.5729	3.5607	3.65604	3.85928	3.88632	AT1G29720	protein kinase family protein	-0.406518	-0.673248	-0.859313	-1.48363	-0.813408	-0.267867	-0.465217	-0.66325
AT1G29660	GDSL-motif lipase/hydrolase family protein	0.470417	0.612374	0.832086	0.933077	0.300372	0.223287	0.063712	0.148381	AT1G27760	interferon-related developmental regulator family protein / IFRD protein family	-0.211812	-0.279665	-0.287945	-0.151736	-0.252397	-0.156563	-0.0835884	-0.00981258	AT1G47980	hypothetical protein	2.18055	2.41326	2.54691	2.50085	1.48341	1.94301	2.15874	3.30674	AT1G29730	kinase/ protein serine/threonine kinase	-0.418323	-0.361013	-1.06563	-1.45759	-0.732806	-0.514225	-0.543747	-0.807221
AT1G29700	hypothetical protein	0.328609	0.185973	0.196678	0.344226	0.379564	0.143442	0.0988817	0.249802	AT1G28080	hypothetical protein	-0.220713	-0.122616	-0.482965	-0.797419	-0.0486571	0.0713376	0.0812161	0.132468	AT1G47990	ATGA2OX4 (GIBBERELLIN 2-OXIDASE 4); gibberellin 2-beta-dioxygenase	0.635299	0.881159	0.819329	0.507455	0.659849	0.98226	1.02481	1.16136	AT1G29740	leucine-rich repeat family protein / protein kinase family protein	-0.397534	-0.356139	-0.754989	-1.00399	-0.617203	-0.790939	-0.837111	-1.22129
AT1G29830	hypothetical protein	-0.0599062	0.225618	0.153459	0.338706	-0.735062	-0.947609	-0.609476	-0.633324	AT1G28330	DRM1 (DORMANCY-ASSOCIATED PROTEIN 1)	-0.626457	-0.431542	-0.327869	-0.37479	0.20717	-0.358676	-0.0902744	-1.0055	AT1G48000	MYB112 (myb domain protein 112); DNA binding / transcription factor	0.671763	0.862383	0.984001	0.943266	0.864783	0.851891	0.646631	0.834791	AT1G30230	elongation factor 1-beta / EF-1-beta	-0.176948	-0.16028	-0.220491	-0.286771	-0.206582	-0.182588	-0.174296	-0.304893
AT1G29840	esterase/lipase/thioesterase family protein	0.285926	0.310603	0.388216	0.237793	0.0547309	0.0642841	0.0898864	-0.194017	AT1G28660	lipase, putative	-0.51136	-0.826494	-1.01612	-0.761855	0.131528	0.152923	0.00985301	0.240377	AT1G48040	protein serine/threonine phosphatase	0.0957195	0.11821	0.118865	0.291853	0.186383	0.212382	0.273136	0.386419	AT1G30280	heat shock protein binding	-0.473458	-0.839255	-1.21062	-1.41327	-0.704114	-0.814927	-0.791958	-0.771729
AT1G29850	double-stranded DNA-binding family protein	0.132209	0.178014	0.181155	0.192398	0.0112601	0.0164514	0.0511207	0.0537126	AT1G28670	ARAB-1 (Arabidopsis lipase); carboxylesterase	-0.375334	-0.386933	-0.413883	-0.578589	0.0622544	-0.152709	-0.117593	-0.25054	AT1G48090	C2 domain-containing protein	0.189998	0.112913	-0.234937	-0.285236	0.14055	0.196274	-0.0653558	0.151755	AT1G30360	ERD4 (EARLY-RESPONSIVE TO DEHYDRATION 4)	-0.412984	-0.276079	-0.371151	-0.65315	-0.298532	-0.506384	-0.318524	-0.932734
AT1G29980	hypothetical protein	0.35089	0.570109	0.77221	0.82866	0.0513022	0.0578906	0.317945	0.468918	AT1G28680	transferase family protein	-0.0354998	-0.28715	-0.283171	-0.269252	-0.28286	-0.00722381	-0.215926	0.227071	AT1G48130	ATPER1 (Arabidopsis thaliana 1-cysteine peroxiredoxin 1); antioxidant	2.53828	2.77364	2.13406	5.67067	1.69155	3.40958	5.2088	6.30558	AT1G30370	lipase class 3 family protein	-0.537024	-0.623873	-1.02699	-1.98311	-0.336798	-0.495405	-0.70313	-1.03413
AT1G29990	prefoldin, putative	0.193589	0.184168	0.26442	0.262238	0.184764	0.0590154	0.101218	0.0708931	AT1G28760	hypothetical protein	-0.0881132	-0.0489895	-0.193204	-0.294355	-0.205489	0.0270341	0.0815024	0.22645	AT1G48170	hypothetical protein	0.144236	0.210186	0.305837	0.0918794	0.0355599	0.108945	0.246513	-0.168908	AT1G30410	ATMRP13 (Arabidopsis thaliana multidrug resistance-associated protein 13)	-0.288242	-0.369054	-0.35593	-0.37796	-0.348894	-0.348344	-0.303178	-0.465185
AT1G30070	SGS domain-containing protein	0.485603	0.367133	0.54376	0.514777	0.059983	0.244125	0.347743	0.553624	AT1G29120	hypothetical protein	-0.165018	-0.0896886	-0.224705	-0.129101	0.141483	-0.118658	0.0342387	-0.273265	AT1G48370	YSL8 (YELLOW STRIPE LIKE 8); oligopeptide transporter	0.559862	0.792521	0.888005	0.887505	0.591371	0.523824	0.824728	0.555617	AT1G30420	ATMRP12 (Arabidopsis thaliana multidrug resistance-associated protein 12)	-0.236584	-0.318412	-0.650704	-0.508608	-0.240331	-0.0651194	-0.0352899	-0.0146057
AT1G30250	hypothetical protein	0.916026	1.84149	3.25279	5.0868	-0.0260955	0.421967	0.92273	1.49552	AT1G29200	hypothetical protein	-0.282133	-0.324092	-0.81294	-1.10201	0.495855	0.236903	0.163036	0.0877679	AT1G48440	hypothetical protein	0.217327	0.170531	0.38112	0.402881	0.148304	0.192666	0.247949	0.190755	AT1G30730	FAD-binding domain-containing protein	-0.11675	-0.0891759	-0.463896	-0.556461	-0.390719	-0.742311	-1.22736	-1.05641
AT1G30260	AGL79 (AGAMOUS-LIKE 79)	0.462927	0.355775	1.10087	1.62191	0.0619587	0.46342	0.63828	0.381835	AT1G29520	AWPM-19-like membrane family protein	-0.274616	-0.252556	-0.522511	-0.865215	-0.138578	-0.119929	-0.180531	-0.49126	AT1G48470	GLN1;5 (GLUTAMINE SYNTHETASE 1;5); glutamate-ammonia ligase	0.895898	0.57427	0.628946	1.09333	0.464669	0.731574	0.68789	0.90748	AT1G30840	ATPUP4 (Arabidopsis thaliana purine permease 4); purine transmembrane transporter	-0.464572	-0.338288	-0.789945	-1.33172	-0.375466	-0.465836	-0.253432	-0.7477
AT1G30460	ATCPSF30/CPSF30; RNA binding / calmodulin binding / endonuclease/ nucleic acid binding / protein binding	-0.0621497	0.0195443	-0.0637903	-0.184296	-0.243719	-0.173558	-0.0254546	-0.0663794	AT1G29560	nucleic acid binding / zinc ion binding	-1.43358	-1.42317	1.29338	1.70226	-1.02213	-0.918354	-0.473613	0.356438	AT1G48560	hypothetical protein	0.252886	0.250296	0.276572	0.264724	-0.185443	-0.00934756	0.0640187	0.315181	AT1G30860	protein binding / zinc ion binding	-0.559452	-0.853125	-1.27613	-1.62089	-0.419556	-0.428915	-0.45536	-0.113669
AT1G30475	hypothetical protein	0.453406	0.41233	0.734038	0.967247	0.313453	0.348084	0.238797	0.41463	AT1G29610	hypothetical protein	-1.05011	-0.620787	-0.851676	-0.445784	0.400739	-0.364213	0.148609	-1.14849	AT1G48660	auxin-responsive GH3 family protein	1.01842	0.803656	0.758014	0.563828	0.699603	0.65368	0.371136	0.563999	AT1G31050	transcription factor	-0.284815	-0.265702	-0.554456	-0.979306	-0.451227	-0.490145	-0.526045	-0.704667
AT1G30515	hypothetical protein	0.856306	0.80539	0.782326	0.144603	0.104621	0.10497	0.185711	-0.106269	AT1G29720	protein kinase family protein	-0.406518	-0.673248	-0.859313	-1.48363	-0.813408	-0.267867	-0.465217	-0.66325	AT1G48670	auxin-responsive GH3 family protein	1.08518	1.20905	1.42635	1.32877	0.154709	0.701401	0.512682	1.17448	AT1G31420	leucine-rich repeat transmembrane protein kinase, putative	-0.327379	-0.329533	-0.460408	-0.671626	-0.360313	-0.460885	-0.568671	-0.837096
AT1G30530	UDP-glucoronosyl/UDP-glucosyl transferase family protein	0.353235	0.329055	0.724944	0.894289	0.0378818	0.114987	0.0209116	0.479251	AT1G29800	zinc ion binding	-0.0548742	-0.217975	-0.196461	-0.1425	0.0746355	-0.0468279	-0.222523	-0.156527	AT1G48700	oxidoreductase, acting on paired donors, with incorporation or reduction of molecular oxygen, 2-oxoglutarate as one donor, and incorporation of one atom each of oxygen into both donors	2.12868	2.05817	2.20638	2.26312	2.09238	2.70379	2.41442	2.77088	AT1G31470	NFD4 (NUCLEAR FUSION DEFECTIVE 4)	-0.361928	-0.330718	-0.268326	-0.42628	-0.444687	-0.415298	-0.478748	-0.626541
AT1G30620	HSR8/MUR4/UXE1 (MURUS 4); UDP-arabinose 4-epimerase/ catalytic	0.409246	0.531472	0.724358	0.539833	-0.0796149	0.00717141	0.12909	0.232385	AT1G30080	glycosyl hydrolase family 17 protein	-0.248663	-0.323353	-0.675346	-0.79221	0.135752	-0.255505	-0.209054	-0.280058	AT1G48750	protease inhibitor/seed storage/lipid transfer protein (LTP) family protein	0.375516	0.523942	0.521491	0.151322	0.920843	0.761611	0.952573	0.710778	AT1G31480	SGR2 (SHOOT GRAVITROPISM 2)	-0.190978	-0.111734	-0.351154	-0.632126	-0.205596	-0.168102	-0.281559	-0.16159
AT1G30630	coatomer protein epsilon subunit family protein / COPE family protein	0.209955	0.152388	0.330116	0.185507	-0.011353	0.0467408	-0.0564853	0.017318	AT1G30130	hypothetical protein	-0.255297	-0.338402	-0.540808	-0.650949	-0.0494537	0.000725455	-0.22958	-0.0299697	AT1G49160	WNK7 (Arabidopsis WNK kinase 7); kinase	0.977316	0.904177	1.09171	0.834667	0.521253	0.830139	0.862696	0.912	AT1G31780	hypothetical protein	-0.0830107	-0.0677713	-0.202791	-0.495364	-0.312274	-0.131996	-0.168514	-0.177084
AT1G30650	WRKY14 (WRKY DNA-binding protein 14); transcription factor	0.378762	0.418357	0.451081	0.38665	0.0288438	0.638474	0.35937	0.758074	AT1G30420	ATMRP12 (Arabidopsis thaliana multidrug resistance-associated protein 12)	-0.236584	-0.318412	-0.650704	-0.508608	-0.240331	-0.0651194	-0.0352899	-0.0146057	AT1G49170	hypothetical protein	0.163707	0.223223	0.309843	0.441813	0.410836	0.342193	0.456401	0.36567	AT1G31850	dehydration-responsive protein, putative	-0.149263	-0.123477	-0.198612	-0.357952	-0.470098	-0.440058	-0.445015	-0.358593
AT1G30720	FAD-binding domain-containing protein	0.216712	0.400334	0.169761	0.131218	0.425185	0.0907013	-0.26039	6.30276e-06	AT1G30470	SIT4 phosphatase-associated family protein	-0.0876917	-0.0882269	-0.308915	-0.103675	0.0428857	-0.0629261	-0.135949	0.0485397	AT1G49310	hypothetical protein	0.29558	0.371386	0.784794	0.907425	0.376384	0.106722	0.164205	0.23309	AT1G32230	RCD1 (RADICAL-INDUCED CELL DEATH1)	-0.330373	-0.439664	-0.618335	-0.704469	-0.26971	-0.410137	-0.29629	-0.315435
AT1G30740	FAD-binding domain-containing protein	1.49432	1.47259	1.64654	1.47818	0.798113	1.22994	0.831882	0.599454	AT1G30590	RNA polymerase I specific transcription initiation factor RRN3 family protein	-0.210028	-0.165634	-0.465914	-0.72514	-0.305925	-0.139188	0.0933042	-0.179583	AT1G49360	F-box family protein	0.0925694	0.215134	0.270923	0.449489	0.179023	0.231637	0.358524	0.476924	AT1G32460	hypothetical protein	-0.585643	-0.505722	-0.578285	-0.6863	-0.298499	-0.434848	-0.581406	-0.530403
AT1G30814	hypothetical protein	0.523322	1.39197	1.29201	0.271704	0.251308	-0.661364	-0.290351	0.531876	AT1G30680	toprim domain-containing protein	0.0263546	0.0755083	0.104376	0.471649	0.0744918	-0.0177828	0.168826	0.5872	AT1G49370	pseudo	0.398022	0.295929	0.231354	0.219149	0.684379	0.81546	0.919092	0.969238	AT1G32780	alcohol dehydrogenase, putative	-0.493946	-0.766286	-1.09788	-1.78981	-1.0712	-1.1899	-1.34011	-1.34886
AT1G30825	ARPC2A/DIS2 (DISTORTED TRICHOMES 2); structural molecule	0.0996202	0.0388679	0.0455502	0.0814848	0.0145603	-0.0798346	0.0133411	-0.220106	AT1G30820	CTP synthase, putative / UTP--ammonia ligase, putative	-0.358369	-0.304117	-0.462663	-0.61986	-0.153685	-0.0974477	0.181311	-0.473184	AT1G49520	SWIB complex BAF60b domain-containing protein	0.509002	0.376017	0.717412	0.366683	0.13455	0.453478	0.213078	0.394043	AT1G32810	protein binding / zinc ion binding	-0.168352	-0.115727	-0.21779	-0.680032	-0.616994	-0.218893	-0.351896	-0.331666
AT1G30845	hypothetical protein	0.256229	0.190679	0.240361	0.244227	0.0745291	0.0278612	-0.0500057	-0.221927	AT1G30870	cationic peroxidase, putative	-0.0611474	-0.406839	-0.905508	-1.4015	-0.345708	0.00586768	-0.612982	-0.340821	AT1G49560	myb family transcription factor	0.476026	0.154117	0.159555	0.24725	0.230969	0.224892	0.20994	0.531589	AT1G33080	MATE efflux family protein	-0.293362	-0.294432	-0.488459	-0.522352	-0.748709	-0.744987	-0.828936	-1.12637
AT1G31140	AGL63 (AGAMOUS-LIKE 63); DNA binding / transcription factor	1.9529	1.97193	2.82744	2.87312	0.379382	1.43457	1.45576	1.59843	AT1G30910	molybdenum cofactor sulfurase family protein	-0.144775	-0.20141	-0.240495	-0.11265	0.26251	-0.00904686	-0.104592	0.133608	AT1G49740	phospholipase C	0.07283	0.140781	0.0913764	0.206728	0.548245	0.23057	0.337371	0.328224	AT1G33170	dehydration-responsive family protein	-0.00500101	-0.180412	-0.606717	-1.21784	-0.407118	-0.446042	-0.383073	-0.55772
AT1G31180	3-isopropylmalate dehydrogenase, chloroplast, putative	0.134518	0.211086	0.277368	0.255987	0.0522997	0.0150327	-0.000681101	0.280885	AT1G31230	AK-HSDH/AK-HSDH I (ASPARTATE KINASE-HOMOSERINE DEHYDROGENASE I); aspartate kinase/ homoserine dehydrogenase	0.0233768	0.0912507	-0.0665343	-0.176248	-0.0111431	0.15205	0.245861	0.44337	AT1G49830	ethylene-responsive protein -related	0.390005	0.501363	0.773648	0.408851	0.339154	0.48777	0.330021	0.601273	AT1G33250	fringe-related protein	-0.188481	-0.0824447	-0.237698	-0.221749	-0.0961313	-0.275537	-0.178306	-0.381949
AT1G31280	AGO2 (ARGONAUTE 2); nucleic acid binding	0.469583	0.295245	0.345627	0.345538	-0.19864	0.334052	0.0899236	0.479575	AT1G31360	RECQL2 (Arabidopsis RecQ helicase l2); ATP-dependent helicase/ protein binding	-0.274171	-0.231824	-0.467319	-0.792062	-0.261642	0.00927567	-0.0308938	-0.107184	AT1G49980	hypothetical protein	0.316523	0.338453	0.459343	0.48571	0.211012	0.398689	0.419019	0.362976	AT1G33280	ANAC015 (Arabidopsis NAC domain containing protein 15); transcription factor	-0.465821	-0.528077	-1.04024	-1.30288	-0.476106	-0.243936	-0.15025	-0.351574
AT1G31290	PAZ domain-containing protein / piwi domain-containing protein	-0.122101	0.197755	0.000975168	-0.0850301	-0.391885	-0.560801	-0.94204	-0.555709	AT1G31485	misc_RNA	-0.573462	-0.592574	-1.13427	-1.30675	-0.18012	0.149913	0.357558	0.412632	AT1G50575	lysine decarboxylase family protein	0.404984	0.285321	0.182111	0.434349	0.247137	0.260944	0.200867	0.551441	AT1G33460	pseudo	-0.18176	0.642566	0.0278703	-0.414276	2.29898	0.294954	-1.00057	-1.21451
AT1G31320	LBD4 (LOB DOMAIN-CONTAINING PROTEIN 4)	0.438046	0.38118	0.264601	0.119214	-0.0165391	0.239032	0.504722	0.690816	AT1G31814	FRL2 (FRIGIDA LIKE 2)	-0.223295	-0.101711	-0.125887	-0.102589	-0.0969029	-0.284627	-0.044698	-0.510741	AT1G50630	hypothetical protein	0.563312	0.648716	1.01825	1.11225	0.398733	0.523359	0.402391	0.439305	AT1G33540	SCPL18 (serine carboxypeptidase-like 18); serine carboxypeptidase	-0.353717	-0.500083	-1.16919	-1.24624	-0.86254	-0.85667	-1.16122	-1.48955
AT1G31340	RUB1 (RELATED TO UBIQUITIN 1)	0.177468	0.212786	0.220314	0.15171	0.0494513	0.0208104	0.0755473	0.1265	AT1G31900	pseudo	-0.136519	-0.173228	-0.418457	-0.646711	0.230097	0.232125	0.229694	0.160328	AT1G50710	hypothetical protein	0.254874	0.210398	0.182961	0.303521	0.279329	0.157494	0.263378	0.413357	AT1G33700	catalytic	-0.434955	-0.580394	-1.10063	-1.5853	-0.209808	-0.119074	-0.568799	-0.603418
AT1G31350	F-box family protein	0.0968796	0.2494	0.519535	0.761219	0.0498195	0.0186236	0.324702	0.050652	AT1G31935	misc_RNA	-0.100396	-0.296691	-0.328226	-0.390539	0.169051	0.0367893	-0.418298	-0.472959	AT1G50740	hypothetical protein	0.110996	0.450323	0.57032	0.51861	0.306537	0.334089	0.298976	0.212133	AT1G33790	jacalin lectin family protein	-0.645876	-0.370699	-0.467184	-0.282463	-0.278504	-0.299367	-0.186005	-0.0680417
AT1G31500	endonuclease/exonuclease/phosphatase family protein	0.347323	0.148024	0.265851	0.177138	-0.112854	-0.00513937	-0.067573	-0.101114	AT1G31950	terpene synthase/cyclase family protein	-0.237136	-0.269909	-1.53693	-1.6661	-0.150619	0.153368	0.166081	-0.0940226	AT1G50830	hypothetical protein	1.12092	0.538368	0.746585	0.557134	0.346592	0.953849	0.733655	1.25513	AT1G33800	hypothetical protein	-0.293126	-0.448329	-0.829643	-0.937523	-0.0965157	-0.109606	-0.351885	-0.631635
AT1G31650	ATROPGEF14/ROPGEF14 (KINASE PARTNER PROTEIN-LIKE); Rho guanyl-nucleotide exchange factor/	0.350548	0.198409	0.114358	0.0727638	0.0685326	0.224936	0.108403	0.13231	AT1G32070	ATNSI (NUCLEAR SHUTTLE INTERACTING)	-0.117513	-0.227356	-0.0851884	-0.195476	0.0508611	-0.109397	-0.283869	-0.460828	AT1G50960	ATGA2OX7 (GIBBERELLIN 2-OXIDASE 7); gibberellin 2-beta-dioxygenase/ gibberellin 20-oxidase	1.7865	1.28763	1.77009	3.10577	1.50091	1.38555	1.07649	1.19528	AT1G33811	GDSL-motif lipase/hydrolase family protein	-0.100776	-0.250358	-0.41043	-0.737453	-0.603679	-0.404012	-0.543759	-0.878646
AT1G31790	pentatricopeptide (PPR) repeat-containing protein	0.0746837	0.170482	0.345338	0.57226	0.179311	0.00414396	0.13048	0.344165	AT1G32100	pinoresinol-lariciresinol reductase, putative	-0.0606862	-0.156072	-0.477497	-0.785288	0.263416	0.342412	0.122649	0.222758	AT1G50970	membrane trafficking VPS53 family protein	0.423946	0.440339	0.601383	0.196934	-0.0961167	0.0513583	0.322008	0.31662	AT1G33840	hypothetical protein	-1.30165	-1.35012	-1.74504	-1.4238	-2.95478	-3.5224	-4.22966	-3.8027
AT1G31820	amino acid permease family protein	0.505417	0.32276	0.852877	0.978535	0.415208	0.281442	0.0639166	0.212731	AT1G32170	XTR4 (XYLOGLUCAN ENDOTRANSGLYCOSYLASE 4); hydrolase, acting on glycosyl bonds	-0.233714	-0.314546	-0.289671	-0.270138	0.0564201	0.1462	-0.147925	-0.141579	AT1G51030	hypothetical protein	1.39302	1.22814	1.30553	1.35891	1.42442	1.09624	1.12498	1.47577	AT1G33870	avirulence-responsive protein, putative / avirulence induced gene protein, putative / AIG protein, putative	-0.977796	-1.10437	-2.08795	-2.958	-2.11993	-2.04287	-3.01094	-3.75341
AT1G31885	transporter	0.385712	0.360238	0.455878	0.286844	-0.375287	-0.245498	-0.573155	-0.0549704	AT1G32190	hypothetical protein	-0.33651	-0.236881	-0.672052	-0.67927	-0.212413	-0.166763	-0.0327588	-0.15896	AT1G51090	heavy-metal-associated domain-containing protein	0.903699	0.934381	1.30096	1.38568	0.877442	0.926908	0.797509	1.10001	AT1G33880	avirulence-responsive family protein / avirulence induced gene (AIG1) family protein	-0.827379	-0.92146	-1.8637	-1.86247	-1.90967	-1.25285	-2.09032	-2.27627
AT1G32210	ATDAD1 (DEFENDER AGAINST APOPTOTIC DEATH 1)	0.0901596	0.122268	0.208917	0.265931	0.106164	-0.0192187	0.208585	-0.0123383	AT1G32230	RCD1 (RADICAL-INDUCED CELL DEATH1)	-0.330373	-0.439664	-0.618335	-0.704469	-0.26971	-0.410137	-0.29629	-0.315435	AT1G51140	basic helix-loop-helix (bHLH) family protein	1.07294	1.00132	1.11896	1.01548	1.13091	1.5929	1.39927	1.68568	AT1G33890	avirulence-responsive protein, putative / avirulence induced gene protein, putative / AIG protein, putative	-0.875259	-1.11369	-1.74887	-2.53084	-1.94313	-1.89341	-2.10672	-3.11253
AT1G32340	NHL8 (NDR1/HIN1-like 8); protein binding / zinc ion binding	0.0522896	0.107684	0.214538	0.30095	0.0911657	0.0454915	-0.127661	0.139763	AT1G32370	TOM2B (tobamovirus multiplication protein 2B)	0.0464322	0.016967	-0.00359027	-0.0653498	0.0194792	0.0259626	0.109353	0.0260304	AT1G51500	CER5 (ECERIFERUM 5); ATPase, coupled to transmembrane movement of substances	0.434409	0.229013	0.617911	0.638627	0.273719	0.353531	0.187637	0.301201	AT1G34200	oxidoreductase family protein	-0.0464381	-0.0304013	-0.00705159	0.111595	0.0463831	-0.144414	0.0876381	0.0679411
AT1G32870	ANAC013 (Arabidopsis NAC domain containing protein 13); transcription factor	0.0781708	0.14553	0.221497	0.465297	0.0338112	0.0308018	-0.0577655	0.327272	AT1G32415	pentatricopeptide (PPR) repeat-containing protein	-0.133682	-0.0932029	-0.144363	-0.276952	-0.222522	-0.232902	-0.204649	-0.0525344	AT1G51620	protein kinase family protein	0.709701	1.28786	1.78265	1.73098	0.14127	0.614988	0.431155	0.721429	AT1G34210	SERK2 (SOMATIC EMBRYOGENESIS RECEPTOR-LIKE KINASE 2); kinase	-0.557506	-0.359683	-0.587417	-0.605757	-0.679766	-0.72401	-0.413907	-0.786287
AT1G33040	NACA5 (NASCENT POLYPEPTIDE-ASSOCIATED COMPLEX SUBUNIT ALPHA-LIKE PROTEIN 5)	0.229107	0.232867	0.207175	0.262741	0.0104836	0.0702476	0.168829	0.14887	AT1G32450	proton-dependent oligopeptide transport (POT) family protein	-0.252178	-0.29437	-0.2235	-0.395106	0.771232	0.816535	0.873284	0.431135	AT1G51730	RWD domain-containing protein	0.0391773	0.0448113	0.0262041	0.107427	0.103648	0.0862954	0.133862	0.221334	AT1G34300	lectin protein kinase family protein	-0.0845345	-0.0886288	-0.0692451	-0.0626465	-0.0938713	-0.124148	-0.283524	-0.173005
AT1G33270	patatin-related	0.174074	0.0653585	0.239809	0.2484	0.179979	0.19936	0.151947	0.326968	AT1G32460	hypothetical protein	-0.585643	-0.505722	-0.578285	-0.6863	-0.298499	-0.434848	-0.581406	-0.530403	AT1G51830	ATP binding / kinase/ protein serine/threonine kinase	0.918667	1.46175	2.1374	2.7283	0.659222	2.58133	2.86416	4.17646	AT1G34315	hypothetical protein	-1.03833	-0.962232	-1.17107	-1.30291	-0.510882	-0.622885	-0.415397	-0.672848
AT1G33340	epsin N-terminal homology (ENTH) domain-containing protein / clathrin assembly protein-related	0.538033	0.538251	0.481779	0.938988	0.712179	0.261591	0.111789	0.163242	AT1G32740	protein binding / zinc ion binding	-0.085407	-0.196165	-0.317501	-0.320889	0.123743	0.253725	0.206522	0.250801	AT1G51840	protein kinase-related	1.72638	2.09828	2.41084	2.65671	1.96043	2.92217	2.8235	3.80932	AT1G34320	hypothetical protein	-0.121683	-0.096777	-0.229348	-0.246411	-0.162548	-0.0938429	-0.124036	-0.0681186
AT1G33410	SAR1 (SUPPRESSOR OF AUXIN RESISTANCE1)	-0.662012	-0.163229	0.281463	-0.527308	-0.948595	-0.88376	-0.426369	-1.37667	AT1G32940	ATSBT3; subtilase	-0.2801	-0.481644	-0.23886	-0.315272	-0.171156	-0.00574337	-0.226261	-0.146525	AT1G52000	jacalin lectin family protein	1.36576	1.93123	3.33296	3.54416	1.61093	2.12179	2.55083	3.31464	AT1G34360	translation initiation factor 3 (IF-3) family protein	-0.324302	-0.0938563	-0.236125	-0.337277	-0.45892	-0.409774	-0.121628	-0.27256
AT1G33475	hypothetical protein	0.451722	0.408436	0.549695	0.398794	0.564791	0.324773	0.0204056	0.247116	AT1G33360	ATP-dependent Clp protease ATP-binding subunit ClpX, putative	-0.102547	-0.0431851	-0.249468	-0.191164	0.0648354	-0.0862949	0.110328	-0.21023	AT1G52030	MBP2 (MYROSINASE-BINDING PROTEIN 2)	0.880014	1.96388	4.48712	5.04278	1.11492	0.957716	1.33995	2.69693	AT1G35186	pseudo	-0.921868	-0.870323	-1.69356	-1.68075	-0.70416	-1.01392	-1.74502	-1.65465
AT1G33770	protein kinase family protein	0.146906	0.4545	0.602089	0.11649	-0.739174	-0.344361	-0.870933	-0.815168	AT1G33615	misc_RNA	-0.479517	-0.310518	-0.585113	-0.436121	0.274502	-0.256249	0.208523	-0.183819	AT1G52040	MBP1 (MYROSINASE-BINDING PROTEIN 1)	1.97889	3.45369	5.62946	5.49453	0.466982	2.0894	2.68405	3.75231	AT1G35330	zinc finger (C3HC4-type RING finger) family protein	-0.344432	-0.930989	-0.597534	-0.818878	-0.359925	-0.157401	-0.938636	-0.549613
AT1G33960	AIG1 (AVRRPT2-INDUCED GENE 1); GTP binding	1.41147	2.13349	2.84332	3.53765	0.0452457	2.11824	0.760344	1.51653	AT1G33680	nucleic acid binding	-0.132747	0.0424058	-0.0354512	-0.274525	-0.426551	-0.187984	-0.167607	-0.280682	AT1G52340	ABA2 (ABA DEFICIENT 2); oxidoreductase	0.142488	0.159696	0.176362	0.113735	0.0844377	0.0837629	0.137816	0.14181	AT1G35400	hypothetical protein	-0.00252695	0.0246403	0.034764	0.0390911	0.0545713	0.00721974	0.0352923	0.0483887
AT1G33990	hydrolase, alpha/beta fold family protein	0.274171	0.207709	0.439925	0.230233	-0.133488	0.16708	0.118445	0.059305	AT1G33750	terpene synthase/cyclase family protein	-0.640553	-0.452267	-1.78912	-1.99256	-0.407869	-0.143995	0.112084	-0.3607	AT1G52342	hypothetical protein	0.650199	0.14015	0.333477	0.390062	0.464526	1.13916	0.43269	0.660299	AT1G35580	CINV1 (CYTOSOLIC INVERTASE 1); beta-fructofuranosidase	-0.292462	-0.327685	-0.296825	-0.333155	-0.620925	-0.411738	-0.632939	-0.471174
AT1G34020	transporter-related	0.278823	0.302593	0.303366	0.626454	0.294804	0.106437	0.207043	0.248203	AT1G34047	hypothetical protein	-0.238221	-1.03723	-2.41417	-2.50982	0.972899	-2.13018	-3.04291	-3.79795	AT1G52370	ribosomal protein L22 family protein	0.196247	0.227028	0.35494	0.348006	0.100438	0.0951796	0.132201	0.167794	AT1G35647	pseudo	-0.0280224	-0.0281988	-0.0458649	-0.0542788	-0.0583057	-0.0443888	-0.0711314	-0.0485636
AT1G34260	phosphatidylinositol-4-phosphate 5-kinase family protein	0.00810025	0.149739	0.0704176	0.0256183	-0.374697	-0.362043	-0.471624	-0.32487	AT1G34210	SERK2 (SOMATIC EMBRYOGENESIS RECEPTOR-LIKE KINASE 2); kinase	-0.557506	-0.359683	-0.587417	-0.605757	-0.679766	-0.72401	-0.413907	-0.786287	AT1G52400	BGL1 (BETA-GLUCOSIDASE HOMOLOG 1); hydrolase, hydrolyzing O-glycosyl compounds	1.1009	1.33851	2.97866	2.80797	0.468475	0.7182	0.87271	1.07021	AT1G35670	ATCDPK2 (CALCIUM-DEPENDENT PROTEIN KINASE 2); calmodulin-dependent protein kinase/ kinase	-0.166029	-0.183071	-0.326185	-0.398676	-0.1699	-0.335268	-0.332604	-0.580975
AT1G34350	hypothetical protein	0.132753	0.107558	0.147322	0.361085	0.227489	0.0399772	0.0861063	0.245625	AT1G34320	hypothetical protein	-0.121683	-0.096777	-0.229348	-0.246411	-0.162548	-0.0938429	-0.124036	-0.0681186	AT1G52410	TSA1 (TSK-ASSOCIATING PROTEIN 1)	0.6054	0.990989	2.57375	2.45935	0.688829	0.658407	0.880903	0.677697	AT1G35910	trehalose-6-phosphate phosphatase, putative	-0.633901	-0.872623	-1.3837	-2.28675	-1.62269	-1.6933	-2.108	-2.06398
AT1G34470	permease-related	0.140512	0.0884133	0.128051	0.138504	0.0383838	-0.138132	-0.0663219	-0.0843461	AT1G34330	pseudo	-0.524436	-0.927591	-1.92573	-1.16454	-0.468538	-0.116296	-0.952442	-0.956706	AT1G52530	hypothetical protein	0.312202	0.247392	0.123903	0.153213	0.202766	0.131437	0.100791	0.209266	AT1G36060	AP2 domain-containing transcription factor, putative	-0.757118	-0.502204	-1.5278	-1.53818	-0.706302	-0.667594	-0.441857	-1.10306
AT1G34760	GRF11 (General regulatory factor 11)	0.159639	0.25729	0.533159	0.794911	0.335737	-0.220331	0.20166	-0.886914	AT1G34460	CYCB1;4 (CYCLIN 3); cyclin-dependent protein kinase regulator	-0.517721	-0.634752	-1.16602	-0.330819	0.0126411	-0.153124	0.235972	-0.254538	AT1G52560	26 kDa class I small heat shock protein-like (HSP26-P)	1.40539	1.04236	0.858583	0.136359	1.49906	1.59131	1.61904	1.6075	AT1G36640	hypothetical protein	-1.46501	-1.1608	-1.21661	-0.82837	-0.711843	-1.28441	-1.18844	-1.4332
AT1G35170	hypothetical protein	0.503251	0.553068	0.869095	1.21954	0.681388	0.539473	0.260619	0.561831	AT1G34520	long-chain-alcohol O-fatty-acyltransferase family protein / wax synthase family protein	-0.453875	-1.80399	-1.3467	-1.51995	-0.386773	0.149719	-1.64933	-2.00346	AT1G52565	hypothetical protein	0.438961	0.414133	0.689977	0.616182	0.419604	0.38541	0.54861	0.139994	AT1G36990	hypothetical protein	-0.281837	-0.158484	-0.416128	-0.545235	-0.418375	-0.31978	-0.282544	-0.357113
AT1G35183	hypothetical protein	0.747413	0.735835	0.738729	0.603329	0.136195	0.318208	-0.150531	-0.329846	AT1G34540	CYP94D1 (cytochrome P450, family 94, subfamily D, polypeptide 1); oxygen binding	-0.536616	-0.846534	-0.558034	-1.04069	-0.0771366	-0.419761	-0.137901	-3.11203	AT1G52590	hypothetical protein	0.30215	0.383776	0.701916	0.881687	0.996266	0.549716	0.505806	0.576301	AT1G37010	hypothetical protein	-0.0689999	-0.0896337	-0.109392	-0.118386	-0.130599	-0.134026	-0.128873	-0.0918987
AT1G35290	thioesterase family protein	0.653201	0.714581	1.43097	1.52387	-0.797069	-0.110386	-0.459025	-0.453134	AT1G34780	ATAPRL4 (APR-LIKE 4)	-0.167423	-0.307984	-0.262619	-0.154433	0.0465916	-0.129195	-0.259568	-0.137239	AT1G52600	signal peptidase, putative	0.19686	0.139577	0.150476	0.303445	0.127389	0.109311	0.121109	0.116547	AT1G37030	pseudo	0.0165716	1.37383	0.918681	1.02858	0.543177	0.829411	0.124972	0.54691
AT1G35430	hypothetical protein	0.366241	0.275524	0.588632	0.624604	0.264452	0.140573	0.165435	-0.0220597	AT1G35240	ARF20 (AUXIN RESPONSE FACTOR 20); transcription factor	-0.266148	-0.801383	-0.463472	-0.232522	-0.343275	0.323965	-0.163551	-0.363407	AT1G52690	late embryogenesis abundant protein, putative / LEA protein, putative	0.770355	0.918505	1.72824	2.58754	3.32312	3.41109	3.29671	3.49773	AT1G38410	pseudo	-0.368184	-0.361397	-0.37205	-0.374445	-0.387039	-0.372626	-0.394275	-0.382068
AT1G35513	pseudo	0.185869	0.271487	0.421076	0.430991	0.00558495	0.419848	-0.100988	0.613628	AT1G36180	ATP binding / biotin binding / catalytic/ ligase	-0.0328337	-0.0672583	-0.378311	-0.373055	0.148542	-0.102587	0.122461	0.0607025	AT1G52827	hypothetical protein	1.13525	1.08041	1.52777	1.65487	0.832092	1.31613	0.904312	0.804962	AT1G40078	pseudo	-0.0244261	-0.0220915	-0.0372569	-0.0460908	-0.0498851	-0.0297244	-0.0610509	-0.0433463
AT1G36070	WD-40 repeat family protein	0.205589	0.174435	0.382805	0.392818	-0.0635102	-0.219578	-0.245312	-0.293374	AT1G36330	pseudo	-0.222664	-0.255251	-0.229928	-0.22299	-0.191972	-0.104062	-0.271431	-0.173587	AT1G52855	hypothetical protein	0.672542	0.309409	1.02365	1.43775	0.514751	0.293657	0.200702	0.171612	AT1G43160	RAP2 (related to AP2 6); DNA binding / transcription factor	-0.592655	-1.11964	-1.68408	-1.69106	-0.795453	-0.559422	-1.19298	-0.598652
AT1G36280	adenylosuccinate lyase, putative / adenylosuccinase, putative	0.21743	0.194498	0.15527	0.341013	0.187373	0.0635062	0.246711	0.48336	AT1G36730	eukaryotic translation initiation factor 5, putative / eIF-5, putative	-0.27387	-0.211906	-0.233414	-0.379091	-0.16993	-0.0886323	-0.0645709	0.0257333	AT1G52890	ANAC019 (Arabidopsis NAC domain containing protein 19); transcription factor	1.24385	0.96263	1.93354	1.99808	1.59837	1.59094	1.32778	1.58224	AT1G43190	polypyrimidine tract-binding protein, putative / heterogeneous nuclear ribonucleoprotein, putative	-0.0482343	-0.0569011	-0.159454	-0.195276	-0.123326	-0.114289	-0.0424667	-0.123822
AT1G36380	electron carrier/ ubiquinol-cytochrome-c reductase	0.318255	0.104428	0.195316	0.0500617	0.0309205	0.267384	0.0138335	0.193865	AT1G43040	auxin-responsive protein, putative	-0.0806954	-0.31382	-0.51271	-1.05517	0.124418	-0.53703	-0.853622	-1.50952	AT1G52990	thioredoxin family protein	0.483865	-0.522626	1.35908	-0.623174	-0.139495	0.448972	0.539248	-0.452355	AT1G43620	UDP-glucose:sterol glucosyltransferase, putative	-0.184029	-0.239288	-0.301948	-0.454192	-0.51371	-0.41411	-0.559776	-0.352217
AT1G43180	pseudo	0.268015	0.37186	0.674365	0.460421	-0.063994	0.534042	0.358054	0.327229	AT1G43140	pseudo	-0.371357	-0.51368	-0.726125	-0.551068	-0.229657	0.0143485	-0.41209	-0.0473286	AT1G53060	legume lectin family protein	0.598312	0.495125	0.775407	0.765058	0.35879	0.693343	0.692844	0.863704	AT1G43675	pseudo	-1.14036	-1.98372	-2.81628	-2.68564	-1.81951	-1.71467	-1.89398	-2.00398
AT1G43765	misc_RNA	0.151853	0.269508	0.285984	0.172334	0.0793106	0.0896849	0.186861	-0.316325	AT1G43190	polypyrimidine tract-binding protein, putative / heterogeneous nuclear ribonucleoprotein, putative	-0.0482343	-0.0569011	-0.159454	-0.195276	-0.123326	-0.114289	-0.0424667	-0.123822	AT1G53080	legume lectin family protein	1.56271	1.40294	2.39656	2.30119	1.43065	2.92442	2.60822	3.58176	AT1G43710	EMB1075 (EMBRYO DEFECTIVE 1075); carboxy-lyase	-0.274873	-0.251775	-0.343971	-0.325062	-0.309834	-0.494981	-0.46885	-0.373844
AT1G44350	ILL6 (IAA-leucine resistant (ILR)-like gene 6); metallopeptidase	0.33847	0.665982	1.90232	2.16072	0.555212	0.222338	0.328027	-0.0594835	AT1G43666	lipid transfer protein-related	-0.24736	-0.28765	-0.266171	-0.254274	-0.229299	-0.325196	-0.315222	-0.197061	AT1G53100	acetylglucosaminyltransferase	0.60637	0.382637	0.44855	0.357596	1.63191	1.54008	1.43511	1.5704	AT1G43800	acyl-(acyl-carrier-protein) desaturase, putative / stearoyl-ACP desaturase, putative	-1.14446	-0.663717	-0.845743	-0.881691	-0.726725	-1.1432	-0.270349	-1.80418
AT1G44414	hypothetical protein	0.436117	0.371494	0.700281	0.777787	0.344552	0.0814371	-0.0908067	-0.00496203	AT1G43790	hypothetical protein	-0.276237	-0.309239	-0.826778	-1.30156	0.0108267	0.121456	-0.186251	-0.161586	AT1G53130	stigma-specific Stig1 family protein	1.44039	1.60635	1.12845	1.23638	0.69554	0.38597	0.637138	0.468797	AT1G44050	DC1 domain-containing protein	-0.186619	-0.123079	-0.263351	-0.300596	-0.491127	-0.770388	-1.19802	-0.844162
AT1G44575	NPQ4 (NONPHOTOCHEMICAL QUENCHING)	0.180093	0.246022	0.337918	0.633672	0.494369	0.0548663	-0.118343	0.216588	AT1G43800	acyl-(acyl-carrier-protein) desaturase, putative / stearoyl-ACP desaturase, putative	-1.14446	-0.663717	-0.845743	-0.881691	-0.726725	-1.1432	-0.270349	-1.80418	AT1G53160	SPL4 (SQUAMOSA PROMOTER BINDING PROTEIN-LIKE 4); DNA binding	1.35712	1.76429	1.89049	1.77487	0.941771	0.833382	0.939068	1.05634	AT1G44170	ALDH3H1 (ALDEHYDE DEHYDROGENASE 4); 3-chloroallyl aldehyde dehydrogenase/ aldehyde dehydrogenase (NAD)	-0.187285	-0.231043	-0.113705	-0.198098	-0.431582	-0.427726	-0.605922	-0.56036
AT1G44790	ChaC-like family protein	0.260054	0.231942	0.342629	0.253429	0.211056	0.192942	0.121141	0.210783	AT1G43850	SEU (SEUSS)	-0.0960249	-0.170104	-0.369014	-0.396349	-0.0978587	-0.024579	-0.0829824	-0.00241778	AT1G53310	ATPPC1 (PHOSPHOENOLPYRUVATE CARBOXYLASE 1); phosphoenolpyruvate carboxylase	0.281042	0.16286	-0.01125	-0.489586	-0.377305	-0.0498612	-0.251231	-0.129651	AT1G44608	hypothetical protein	-0.333235	-0.495961	-0.548063	-0.522787	-0.434606	-0.251215	-0.400225	-0.558361
AT1G44800	nodulin MtN21 family protein	0.237534	0.130031	0.442553	0.653175	-0.427674	0.154165	0.210238	-0.037667	AT1G45229	hypothetical protein	-0.202621	-0.30115	-0.550369	-0.676688	-0.0314896	-0.169252	-0.0981499	-0.212589	AT1G53542	hypothetical protein	0.400177	0.427241	0.762464	1.0916	0.12002	0.16519	0.64626	0.455173	AT1G44835	YbaK/prolyl-tRNA synthetase family protein	-0.080479	-0.073675	-0.131072	-0.435722	-0.388245	-0.219367	-0.218354	-0.293726
AT1G44890	hypothetical protein	0.168347	0.141891	0.310833	0.414971	0.0641691	-0.00715561	0.102065	0.119087	AT1G45545	hypothetical protein	-0.877082	-0.703167	-1.27382	-1.45766	-0.112595	0.309466	-0.555083	0.205937	AT1G53690	DNA-directed RNA polymerases I, II, and III 7 kDa subunit, putative	2.65762	2.67513	3.49931	2.77891	2.18686	2.4815	2.31018	2.19476	AT1G45160	kinase	-0.0136473	-0.0537472	-0.172582	-0.311657	-0.0223263	0.0588541	-0.0111176	0.0891548
AT1G45201	hypothetical protein	0.354387	0.359888	0.81661	0.503916	0.0685605	0.184699	-0.000224968	0.0606712	AT1G46768	RAP2 (related to AP2 1); DNA binding / transcription factor	-0.38356	-0.900635	-0.999988	-0.307966	0.809453	0.238436	-0.237749	0.591345	AT1G53830	ATPME2 (Arabidopsis thaliana pectin methylesterase 2)	0.976562	0.692819	0.685552	0.650484	0.63939	0.97752	0.685928	0.862063	AT1G46264	AT-HSFB4 (Arabidopsis thaliana heat shock transcription factor B4); DNA binding / transcription factor	-0.0818481	-0.142812	-0.337243	-0.802365	-0.256547	-0.279886	-0.110856	-0.520212
AT1G45207	remorin family protein	0.135201	0.254194	0.0854378	0.131541	0.239275	0.107596	0.149143	0.246222	AT1G47271	hypothetical protein	-0.159212	-0.316999	-0.560189	-1.17899	0.0214044	-0.125165	-0.509429	-0.58589	AT1G53880	GTP binding / translation initiation factor	0.0633711	0.0795499	0.14859	0.375404	0.207868	0.0704909	0.110789	0.380442	AT1G47240	NRAMP2 (NRAMP metal ion transporter 2); metal ion transmembrane transporter	-0.179961	-0.0270037	-0.154915	-0.545374	-0.578434	-0.444668	-0.335269	-0.678361
AT1G45231	WW domain-containing protein	0.146477	0.116162	0.125348	0.165037	0.0308199	0.0547139	0.0363387	0.351987	AT1G47500	ATRBP47C' (RNA-BINDING PROTEIN 47C'); RNA binding	-0.130695	-0.145466	-0.38391	-0.167765	-0.237448	-0.133897	-0.0750888	0.190139	AT1G54020	myrosinase-associated protein, putative	0.0554692	1.30497	4.45899	4.63175	0.281754	-0.365765	0.0585716	-0.313078	AT1G47480	hydrolase	-0.245657	-0.328511	-0.298016	-0.354901	-0.360207	-0.208659	-0.50124	-0.280448
AT1G45249	ABF2 (ABSCISIC ACID RESPONSIVE ELEMENTS-BINDING FACTOR 2)	0.202738	0.15264	0.165973	0.385309	0.227816	0.382562	0.396858	0.656538	AT1G47590	pseudo	-0.117061	-0.473116	-0.615296	-0.999595	-0.169352	0.382481	0.0677396	-0.0915658	AT1G54040	ESP (EPITHIOSPECIFIER PROTEIN)	0.88834	0.932564	1.75458	1.61152	0.759031	0.748128	0.866061	0.877123	AT1G47600	glycosyl hydrolase family 1 protein	-0.465113	-0.815297	-1.59935	-1.99586	-0.86054	-0.088575	-0.745099	-0.519533
AT1G47200	WPP2 (WPP domain protein 2)	0.130231	0.212918	0.20067	0.289974	0.051436	0.0382841	0.237424	0.188403	AT1G47610	transducin family protein / WD-40 repeat family protein	-0.628578	-1.85252	-1.9898	-1.79322	-0.464926	0.198673	-0.670406	-0.288145	AT1G54050	17 kDa class III heat shock protein (HSP17-CIII)	0.673214	0.344697	0.382315	0.296806	0.434636	0.576222	0.456676	0.667365	AT1G47840	hexokinase, putative	-0.55398	-0.550267	-1.04132	-1.35948	-1.20152	-1.03911	-1.17774	-1.0358
AT1G47380	protein phosphatase 2C-related / PP2C-related	0.217765	0.545442	0.532124	0.766354	0.200753	-0.0616561	0.0600809	-0.0760696	AT1G47860	pseudo	0.0220329	0.267727	0.394927	0.562891	-0.250384	-0.0853797	0.050591	-0.0884884	AT1G54140	TAFII21 (TATA BINDING PROTEIN ASSOCIATED FACTOR 21KDA SUBUNIT); transcription initiation factor	0.194575	0.277906	0.346512	0.166405	-0.129104	0.177126	0.0851591	0.0987458	AT1G48110	ECT7 (evolutionarily conserved C-terminal region 7)	-0.828704	-0.28692	-0.165423	-0.612686	-1.01845	-1.09355	-0.645552	-1.63818
AT1G47395	hypothetical protein	0.338262	1.37837	1.89772	3.2562	0.529393	-1.72312	-2.16233	-1.1822	AT1G48020	invertase/pectin methylesterase inhibitor family protein	-0.330602	-0.893207	-1.75936	-1.84368	-0.253055	0.230048	0.0761184	0.174541	AT1G54150	zinc finger (C3HC4-type RING finger) family protein	0.113158	0.158478	0.23506	0.416371	0.248216	0.122656	0.159756	0.347099	AT1G48325	Expressed protein	-1.43368	-1.25239	-2.07704	-2.73897	-0.593146	-1.88532	-2.44097	-3.06586
AT1G47400	hypothetical protein	0.742202	1.80707	1.97434	3.04842	0.899286	-1.81484	-2.36083	-1.66858	AT1G48540	leucine-rich repeat family protein	-0.113553	-0.32208	-0.428203	-0.42319	0.095632	-0.0164933	-0.0529627	0.0647525	AT1G54200	hypothetical protein	0.28037	0.14148	0.172083	0.25367	0.622218	0.584502	0.536248	0.747173	AT1G48410	AGO1 (ARGONAUTE 1)	-0.304238	-0.475604	-0.860373	-0.995348	-0.78315	-0.383433	-0.709198	-0.144769
AT1G47640	hypothetical protein	0.145618	0.300718	0.384011	0.215952	-0.108254	0.0116863	0.0836371	-0.242931	AT1G48780	hypothetical protein	-0.208678	-0.186514	-0.467454	-0.482139	-0.0133578	-0.12636	0.0930936	-0.111717	AT1G54220	dihydrolipoamide S-acetyltransferase, putative	0.375989	0.292549	0.24084	0.0831468	0.0762469	0.368474	0.171829	0.449139	AT1G48430	dihydroxyacetone kinase family protein	-0.403615	-0.401619	-0.50271	-0.698994	-0.0856302	-0.158237	-0.146297	-0.269058
AT1G48100	glycoside hydrolase family 28 protein / polygalacturonase (pectinase) family protein	0.676664	0.512178	0.436754	0.195085	0.238809	0.285804	0.0471093	0.126898	AT1G48930	ATGH9C1 (ARABIDOPSIS THALIANA GLYCOSYL HYDROLASE 9C1); hydrolase, hydrolyzing O-glycosyl compounds	-0.0948087	-0.477676	-1.05561	-1.37037	-0.287006	-0.0608158	-0.665513	-0.482281	AT1G54250	ATRPABC16 (ARABIDOPSIS THALIANA RNA POLYMERASE I, II AND III 16 KDA SUBUNIT); DNA-directed RNA polymerase	0.126571	0.118119	0.12284	0.389276	0.388214	0.160705	0.328717	0.306003	AT1G48480	RKL1 (Receptor-like kinase 1); ATP binding / kinase/ protein serine/threonine kinase	-0.0423558	-0.131045	-0.447839	-0.387227	-0.0576006	-0.0672488	-0.123065	-0.0131654
AT1G48170	hypothetical protein	0.144236	0.210186	0.305837	0.0918794	0.0355599	0.108945	0.246513	-0.168908	AT1G49210	zinc finger (C3HC4-type RING finger) family protein	-0.129714	-0.472735	-1.06806	-1.73289	0.15455	-0.312119	-0.744104	-0.868471	AT1G54575	hypothetical protein	0.272792	0.600188	0.909223	1.13063	0.522109	0.397929	0.425557	0.356939	AT1G48500	JAZ4/TIFY6A (JASMONATE-ZIM-DOMAIN PROTEIN 4)	-1.1438	-1.13327	-1.21358	-1.22209	-1.00648	-1.47337	-1.6857	-1.45426
AT1G48330	hypothetical protein	0.722576	0.528101	0.697741	0.226933	-0.17718	0.158225	0.088543	-0.26589	AT1G49530	GGPS6 (GERANYLGERANYL PYROPHOSPHATE SYNTHASE 6); farnesyltranstransferase	-0.282065	-0.311475	-0.177246	-0.370238	-0.209643	0.0688685	0.0152642	0.131199	AT1G54830	CCAAT-box binding transcription factor Hap5a, putative	0.307706	0.269621	0.394068	0.528469	0.287445	0.333264	0.253081	0.455136	AT1G48510	cytochrome c oxidase assembly protein surfeit-related	-0.586354	-0.403566	-1.29007	-1.39953	-0.523037	-0.655343	-0.392542	-1.04331
AT1G48380	RHL1 (ROOT HAIRLESS 1)	0.460666	0.502476	0.530436	0.425157	0.290254	0.332357	0.330437	0.354965	AT1G49540	nucleotide binding	-0.105855	-0.115296	-0.299748	-0.0971356	-0.193811	-0.0913527	0.026969	0.202314	AT1G54850	hypothetical protein	0.0526964	0.124644	0.0761572	-0.227494	-0.151476	0.0878528	0.0485328	0.0301687	AT1G48640	lysine and histidine specific transporter, putative	-0.132909	-0.266118	-0.696687	-0.769169	-0.371893	-0.426068	-0.842445	-0.726123
AT1G48420	D-CDES (D-CYSTEINE DESULFHYDRASE); 1-aminocyclopropane-1-carboxylate deaminase/ D-cysteine desulfhydrase/ catalytic	0.0970199	0.110717	0.220555	0.164897	0.195773	0.160647	0.026956	0.225939	AT1G49600	ATRBP47A (ARABIDOPSIS THALIANA RNA-BINDING PROTEIN 47A); RNA binding	-0.201661	-0.162725	-0.40144	-0.347434	-0.271186	-0.327248	0.0342288	-0.432832	AT1G55000	peptidoglycan-binding LysM domain-containing protein	0.327891	0.269907	0.484944	0.735625	0.443363	0.168426	0.138934	0.188023	AT1G48840	hypothetical protein	-0.225609	-0.229053	-0.328123	-0.639429	-0.423405	-0.24101	-0.434391	-0.363106
AT1G48560	hypothetical protein	0.252886	0.250296	0.276572	0.264724	-0.185443	-0.00934756	0.0640187	0.315181	AT1G49760	PAB8 (POLY(A) BINDING PROTEIN 8); RNA binding / translation initiation factor	-0.213382	-0.225683	-0.530327	-0.158339	-0.155082	-0.274099	-0.107624	0.0471107	AT1G55010	PDF1 (plant defensin 1)	1.27055	1.22795	1.34802	1.22941	0.157835	1.0268	1.27998	0.646624	AT1G48870	WD-40 repeat family protein	-0.348691	-0.511323	-0.72566	-0.968311	-0.5931	-0.361506	-0.346373	-0.248566
AT1G48590	C2 domain-containing protein	2.9894	2.92281	3.38683	3.47989	1.31384	2.16462	2.49966	2.40802	AT1G49940	hypothetical protein	-0.217844	-0.260854	-1.12428	-1.38815	-0.122273	0.126543	0.441499	0.0162096	AT1G55040	zinc finger (Ran-binding) family protein	0.237572	0.215163	0.227304	0.712636	0.347671	0.277938	0.646796	1.18637	AT1G49230	zinc finger (C3HC4-type RING finger) family protein	-0.64546	-0.506331	-0.762045	-1.52936	-0.423225	-0.690231	-0.515123	-1.32485
AT1G48605	ATHAL3B (Arabidopsis thaliana Hal3-like protein B); electron carrier	0.148705	0.130584	0.172527	0.128822	0.0336209	0.184699	0.349485	0.432509	AT1G50110	branched-chain amino acid aminotransferase 6 / branched-chain amino acid transaminase 6 (BCAT6)	-0.350159	-0.206039	-0.586912	-0.633545	-0.418631	-0.288386	-0.0937698	0.0610845	AT1G55080	hypothetical protein	0.202323	0.171636	0.294428	0.501297	0.220182	0.227598	0.207162	0.372204	AT1G49240	ACT8 (ACTIN 8); structural constituent of cytoskeleton	-0.0244596	-0.167909	-0.185079	-0.280459	0.0545362	-0.0807672	-0.21786	-0.262894
AT1G48745	hypothetical protein	0.176003	0.337912	0.788637	0.850127	0.235939	0.165571	0.114345	-0.136186	AT1G50420	SCL3 (SCARECROW-LIKE 3); transcription factor	-0.299343	-0.167209	-0.193329	-0.120033	-0.207951	-0.0846933	-0.133677	0.149864	AT1G55260	lipid binding	0.662101	0.535034	0.816876	0.762168	0.403007	0.679897	0.552956	0.840565	AT1G49390	oxidoreductase, 2OG-Fe(II) oxygenase family protein	-0.38747	-0.505126	-0.815644	-1.32931	-0.494914	-0.442859	-0.761473	-0.828035
AT1G49140	NADH-ubiquinone oxidoreductase-related	0.200554	0.268016	0.359278	0.223641	-0.0137501	0.100862	0.114927	0.0299842	AT1G50430	DWF5 (DWARF 5); sterol delta7 reductase	-0.0299379	-0.130582	-0.368611	-0.186188	0.0863426	0.0886522	-0.0114714	0.307598	AT1G55265	hypothetical protein	0.664474	0.533631	0.820658	1.28631	0.997625	0.838073	0.835792	1.13965	AT1G49405	integral membrane protein, putative	-0.233292	-0.243309	-0.443542	-0.624024	-0.22347	-0.191548	-0.421204	-0.667663
AT1G49245	hypothetical protein	0.146532	0.224686	0.413151	0.672919	0.62431	0.202465	0.32346	-0.00691944	AT1G50440	zinc finger (C3HC4-type RING finger) family protein	-0.282534	-0.47149	-0.412557	0.16367	0.277818	0.0849926	0.0939812	-0.115505	AT1G55280	hypothetical protein	0.30965	0.150474	0.184949	0.343281	0.386179	0.265353	0.26854	0.486086	AT1G49450	transducin family protein / WD-40 repeat family protein	-0.922357	-1.23814	-1.85303	-2.37982	-0.386467	-0.188986	-0.951358	-1.03598
AT1G49350	pfkB-type carbohydrate kinase family protein	0.230667	0.309143	0.413844	0.557631	0.148019	0.103297	0.160222	0.0484503	AT1G50930	hypothetical protein	-0.243329	-0.794772	-1.13131	-1.67287	0.215723	0.448019	-0.200895	-0.306642	AT1G55525	misc_RNA	0.388993	2.46361	3.31221	4.68372	0.711627	3.14289	2.75757	1.1734	AT1G49475	DNA binding / transcription factor	-0.263137	-0.297219	-0.291814	-0.274203	-0.518985	-0.543776	-0.414281	-0.65304
AT1G49400	EMB1129 (EMBRYO DEFECTIVE 1129); structural constituent of ribosome	0.191957	0.281121	0.506631	0.477322	0.0336026	0.0630952	0.222847	0.0663355	AT1G51190	PLT2 (PLETHORA 2); transcription factor	-0.475188	-0.404107	-1.2907	-1.71893	-0.537403	-0.215055	0.157029	-0.305119	AT1G55840	SEC14 cytosolic factor (SEC14) / phosphoglyceride transfer protein	0.186154	0.214823	0.23454	0.282486	0.289597	0.216071	0.18297	0.411496	AT1G49600	ATRBP47A (ARABIDOPSIS THALIANA RNA-BINDING PROTEIN 47A); RNA binding	-0.201661	-0.162725	-0.40144	-0.347434	-0.271186	-0.327248	0.0342288	-0.432832
AT1G49430	LACS2 (LONG-CHAIN ACYL-COA SYNTHETASE 2)	0.359436	0.241916	0.40391	0.573436	0.295943	0.330787	0.0665117	0.652168	AT1G51200	zinc finger (AN1-like) family protein	-0.212208	-0.227489	-0.0890703	-0.176537	-0.00106807	-0.132784	-0.131607	-0.299398	AT1G55910	ZIP11 (ZINC TRANSPORTER 11 PRECURSOR); cation transmembrane transporter/ metal ion transmembrane transporter	0.378683	0.227514	0.549731	0.926419	0.465691	0.817376	0.417256	0.991887	AT1G49660	ATCXE5 (ARABIDOPSIS THALIANA CARBOXYESTERASE 5); carboxylesterase	-0.375575	-0.257473	-0.280025	-0.227118	-0.0798534	-0.220458	-0.194969	-0.131402
AT1G49520	SWIB complex BAF60b domain-containing protein	0.509002	0.376017	0.717412	0.366683	0.13455	0.453478	0.213078	0.394043	AT1G51270	hypothetical protein	-0.453502	-0.31681	-0.570391	-0.552809	-0.0914107	-0.014886	0.103845	0.136608	AT1G55915	zinc ion binding	0.402465	0.387457	0.427635	0.590293	0.163679	0.23668	0.326726	0.662228	AT1G49960	xanthine/uracil permease family protein	-0.285971	-0.200569	-0.247362	-0.727904	-0.154326	-0.264676	-0.40271	-0.335248
AT1G49620	ICK5/ICN6/KRP7 (KIP-RELATED PROTEIN 7); cyclin binding / cyclin-dependent protein kinase inhibitor	0.666643	0.793356	1.09344	1.18933	-0.050147	0.216378	0.530012	0.387408	AT1G51360	hypothetical protein	-0.0907192	-0.232973	-0.297399	-0.233617	0.309282	0.224137	0.0916209	0.031097	AT1G55920	AtSerat2;1 (SERINE ACETYLTRANSFERASE 1)	0.332487	0.564607	0.746647	1.10175	0.525645	0.681616	0.737858	1.17173	AT1G50250	FTSH1 (FtsH protease 1); ATP-dependent peptidase/ ATPase/ metallopeptidase	-0.370919	-0.302375	-0.471184	-0.782989	-0.757053	-0.615043	-0.685186	-0.741236
AT1G49650	cell death associated protein-related	0.123567	0.141531	0.188256	0.167471	-0.0796784	-0.111874	0.0108874	0.10685	AT1G51430	hypothetical protein	-0.287147	-0.383915	-0.561482	-0.161025	0.437966	0.129303	0.116058	0.251928	AT1G56060	hypothetical protein	0.699304	1.01272	2.10752	2.2261	0.377717	1.30531	1.0567	1.4796	AT1G50370	serine/threonine protein phosphatase, putative	-0.213407	-0.219062	-0.322011	-0.333851	-0.143812	-0.433934	-0.117809	-0.586477
AT1G49700	hypothetical protein	0.167204	0.424233	0.58753	0.596529	0.17207	0.106122	0.571633	0.261178	AT1G51470	glycosyl hydrolase family 1 protein	-0.324603	-0.631917	-1.28617	-1.5173	-0.521773	-0.0252828	-0.413205	-0.372931	AT1G56150	auxin-responsive family protein	0.806042	0.321767	0.866061	0.98911	0.549545	1.07518	0.716337	0.548249	AT1G50500	HIT1 (HEAT-INTOLERANT 1); transporter	0.0936846	-0.159535	-0.233733	-0.306853	-0.268122	-0.132994	-0.216695	-0.205763
AT1G49880	Erv1/Alr family protein	0.108289	0.122683	0.304073	0.317923	0.13386	0.0336239	0.0962376	0.0590538	AT1G51560	FMN binding	-0.0965295	-0.196988	-0.267184	-0.225821	-0.000962219	-0.0902785	-0.132712	-0.14326	AT1G56170	HAP5B (Heme activator protein (yeast) homolog 5B); DNA binding / transcription factor	0.886276	0.911753	1.18634	1.26608	1.12149	1.52718	1.67104	1.95931	AT1G50520	CYP705A27 (cytochrome P450, family 705, subfamily A, polypeptide 27); oxygen binding	-0.219417	-0.350359	-0.59471	-0.934134	-0.475559	-0.115993	-0.29422	-0.343077
AT1G49990	hypothetical protein	0.364483	0.207704	0.428234	0.294614	0.293151	0.260908	-0.0437592	0.0774313	AT1G51645	misc_RNA	-0.153615	-0.231685	-0.405149	-0.928548	-0.0176864	0.197174	0.0568318	-0.107494	AT1G56450	PBG1 (20S proteasome beta subunit G1); peptidase	0.283667	0.23211	0.226459	0.574542	0.309466	0.261913	0.289414	0.467084	AT1G50890	binding	-0.194023	-0.343393	-0.658753	-0.901687	-0.532762	-0.308675	-0.62481	-0.395837
AT1G50090	aminotransferase class IV family protein	0.80154	1.07832	1.07318	1.1702	-0.147179	-0.210156	-0.104435	0.200192	AT1G51745	hypothetical protein	-0.071469	-0.129191	-0.384841	-0.405782	-0.0252283	0.000374458	-0.0252635	-0.0554315	AT1G56520	disease resistance protein (TIR-NBS-LRR class), putative	0.570515	0.279374	0.220894	0.504969	0.244591	0.730819	0.281846	0.604424	AT1G51110	plastid-lipid associated protein PAP / fibrillin family protein	-0.257073	-0.240819	-0.305972	-0.407771	-0.143001	-0.297407	-0.448031	-0.570675
AT1G50180	disease resistance protein (CC-NBS-LRR class), putative	0.393374	0.514357	0.748459	0.667754	-0.00837485	0.667974	0.58455	0.666689	AT1G51805	leucine-rich repeat protein kinase, putative	-0.189624	-0.362304	-0.112831	-0.165698	0.191188	-0.128956	0.0144056	-0.0265768	AT1G56580	hypothetical protein	0.597744	0.649495	1.10467	0.835894	0.429088	0.418917	0.377483	0.483953	AT1G51310	tRNA (5-methylaminomethyl-2-thiouridylate)-methyltransferase	-0.151087	-0.109003	-0.0810593	-0.189822	-0.332223	-0.248833	-0.163794	-0.116795
AT1G50360	VIIIA (Myosin-like protein VIIA); motor	0.123981	0.179302	0.0720031	0.127879	-0.00533462	0.00552861	0.0562583	0.211666	AT1G51920	hypothetical protein	-1.77548	-1.82139	-1.71276	-1.12529	-0.930794	0.0457894	0.665152	0.4369	AT1G56600	ATGOLS2 (ARABIDOPSIS THALIANA GALACTINOL SYNTHASE 2); transferase, transferring glycosyl groups / transferase, transferring hexosyl groups	2.69702	1.75417	2.56604	3.11037	2.91072	3.12944	2.92237	4.13831	AT1G51570	C2 domain-containing protein	-0.0361507	-0.133208	-0.229093	-0.5331	-0.400521	-0.246461	-0.263151	-0.346508
AT1G50590	pirin, putative	0.469021	0.339016	0.429518	0.48164	0.678962	0.452744	0.0588843	0.304984	AT1G51940	protein kinase family protein / peptidoglycan-binding LysM domain-containing protein	-0.264761	-0.0572004	-0.19235	-0.408498	-0.0671798	-0.298197	-0.13188	-0.342545	AT1G56650	PAP1 (PRODUCTION OF ANTHOCYANIN PIGMENT 1); DNA binding / transcription factor	1.38294	1.84415	3.18198	3.42568	1.25152	1.75942	2.26184	3.00565	AT1G51610	cation efflux family protein / metal tolerance protein, putative (MTPc4)	-0.285615	-0.345816	-0.385531	-0.303492	-0.130037	-0.587337	-0.549019	-0.524075
AT1G50670	OTU-like cysteine protease family protein	0.173315	0.118727	0.216539	0.20102	0.183074	0.11962	0.00558006	0.0415562	AT1G52060	hypothetical protein	-0.167168	-0.272138	-1.04908	-0.954722	-0.588052	-0.131578	-0.256125	0.278972	AT1G58160	jacalin lectin family protein	0.403405	0.292217	0.44602	0.550987	0.416838	0.406234	0.425089	0.527511	AT1G51790	kinase	-0.417433	-0.310868	-0.301685	-0.259047	-0.486256	-0.565091	-0.66108	-0.369483
AT1G51060	HTA10; DNA binding	0.371336	0.409063	0.441508	0.273876	0.120202	0.166361	0.268154	0.107831	AT1G52140	hypothetical protein	-0.588448	-0.286193	-0.250205	-0.448029	0.00384576	-0.645943	-0.338702	-1.38817	AT1G58270	ZW9	0.510682	0.093448	0.29878	0.315807	0.734859	1.35868	1.11162	1.12642	AT1G51802	pseudo	-1.41078	-2.08008	-2.66328	-2.80653	-1.02238	-1.15252	-1.60013	-1.76838
AT1G51390	NFU5 (NFU domain protein 5)	0.194779	0.0966491	0.186648	0.169832	0.107874	0.112415	0.0811318	0.277601	AT1G52150	ATHB-15 (INCURVATA 4); DNA binding / transcription factor	-0.23094	-0.404138	-0.856238	-0.864225	0.144292	-0.112436	-0.170453	-0.0489539	AT1G58360	AAP1 (AMINO ACID PERMEASE 1); amino acid transmembrane transporter	0.743714	1.10199	1.37195	1.50538	0.819902	1.19182	1.05046	1.42485	AT1G51805	leucine-rich repeat protein kinase, putative	-0.189624	-0.362304	-0.112831	-0.165698	0.191188	-0.128956	0.0144056	-0.0265768
AT1G51540	hypothetical protein	0.140507	0.168062	0.220528	0.160855	-0.0862425	-0.00696773	-0.185231	-0.0444629	AT1G52270	hypothetical protein	-0.829806	-1.32354	-1.57481	-2.03776	-0.25713	-0.0348057	-0.503335	-0.514894	AT1G58590	miscRNA	0.40416	0.234662	0.491986	0.575446	0.181281	0.0495305	0.150801	-0.0987437	AT1G51890	leucine-rich repeat protein kinase, putative	-0.906432	-0.72878	-0.610885	-0.342145	-0.698498	-0.965613	-1.16179	-0.666283
AT1G51650	ATP synthase epsilon chain, mitochondrial	0.109461	0.188773	0.199193	0.205896	-0.00525865	0.0192365	0.125097	-0.179551	AT1G52440	hypothetical protein	-1.25208	-0.650165	-0.700067	-1.32191	-0.288043	-1.10381	-1.59814	-2.25549	AT1G59640	ZCW32 (BIGPETAL, BIGPETALUB); DNA binding / transcription factor	0.178684	0.188357	0.587946	0.798831	0.487245	0.29429	0.180923	0.342519	AT1G51915	cryptdin protein-related	-2.407	-2.41048	-1.86062	-1.5992	-1.86816	-2.37884	-1.64224	-1.67468
AT1G51700	ADOF1 (Arabidopsis dof zinc finger protein 1); DNA binding / transcription factor	0.430832	0.479271	0.993974	1.14138	0.231969	0.30709	0.562979	-0.0550086	AT1G52910	hypothetical protein	-0.220215	-0.0741984	-0.173238	-0.412338	-0.31772	-0.259327	0.00375238	-0.77759	AT1G59700	ATGSTU16 (Arabidopsis thaliana Glutathione S-transferase (class tau) 16); glutathione transferase	0.452873	0.306693	0.922863	1.12126	0.551533	0.577443	0.380356	0.654364	AT1G52050	jacalin lectin family protein	-0.833235	-0.939566	-1.73804	-2.09388	-0.725129	-0.808275	-0.89182	-1.26294
AT1G51850	leucine-rich repeat protein kinase, putative	0.254088	0.471435	0.577992	0.97218	-0.0333711	0.218811	0.20847	0.797329	AT1G53180	hypothetical protein	-0.342461	-0.428921	-0.779463	-0.768711	-0.397188	-0.0767458	-0.331968	-0.452833	AT1G60190	armadillo/beta-catenin repeat family protein / U-box domain-containing protein	2.15125	1.36624	2.26455	3.132	1.57963	1.83294	1.49149	1.58391	AT1G52060	hypothetical protein	-0.167168	-0.272138	-1.04908	-0.954722	-0.588052	-0.131578	-0.256125	0.278972
AT1G51960	IQD27 (IQ-domain 27); calmodulin binding	0.865803	0.932869	1.46827	1.30129	0.2925	1.19292	1.24011	1.41124	AT1G53280	DJ-1 family protein	-0.54057	-0.557296	-0.578624	-0.705561	-0.371564	-0.186327	-0.414583	0.0627237	AT1G60470	ATGOLS4 (ARABIDOPSIS THALIANA GALACTINOL SYNTHASE 4); transferase, transferring glycosyl groups / transferase, transferring hexosyl groups	1.20503	1.24803	2.87273	3.80641	1.64117	2.94043	2.55667	2.68201	AT1G52190	proton-dependent oligopeptide transport (POT) family protein	-0.22905	-0.328474	-0.514419	-0.84566	-0.537662	-0.782147	-0.898167	-1.28803
AT1G52155	hypothetical protein	0.135653	0.055867	0.269823	0.0166692	-0.189669	-0.00691177	-0.123101	-0.308039	AT1G53560	hypothetical protein	-0.103432	-0.312628	-0.100034	-0.115452	0.165221	0.0622569	-0.303823	-0.273437	AT1G60590	polygalacturonase, putative / pectinase, putative	1.43319	0.844907	0.707426	0.386964	0.281211	0.919503	0.588737	0.524963	AT1G52200	hypothetical protein	-0.686671	-0.637848	-0.743856	-0.514669	-0.534391	-0.742822	-0.843578	-0.690988
AT1G52260	ATPDIL1-5 (PDI-LIKE 1-5); thiol-disulfide exchange intermediate	0.244165	0.218411	0.356276	0.303043	0.167067	0.122843	0.0487465	0.0943453	AT1G53570	MAP3KA (Mitogen-activated protein kinase kinase kinase 3); kinase	-0.566444	-0.379271	-0.498371	-0.912538	-0.513173	-0.825703	-0.725072	-0.406129	AT1G60710	ATB2; oxidoreductase	0.107895	0.259658	0.329863	0.448257	0.248043	0.17457	0.173882	0.494882	AT1G52360	coatomer protein complex, subunit beta 2 (beta prime), putative	-0.206157	-0.219806	-0.535574	-0.607371	-0.591603	-0.401453	-0.290171	-0.483936
AT1G52370	ribosomal protein L22 family protein	0.196247	0.227028	0.35494	0.348006	0.100438	0.0951796	0.132201	0.167794	AT1G53670	MSRB1 (METHIONINE SULFOXIDE REDUCTASE B 1); peptide-methionine-(S)-S-oxide reductase	-0.203599	-0.278183	0.097542	0.0812077	0.152513	-0.168591	-0.315364	-0.48055	AT1G60740	peroxiredoxin type 2, putative	0.362099	1.07968	1.86191	2.73866	1.32931	0.412422	0.671729	1.67926	AT1G52730	transducin family protein / WD-40 repeat family protein	0.186048	0.0283264	-0.00893917	-0.0299435	-0.0735222	0.0626165	-0.0557139	0.236667
AT1G52450	ubiquitin carboxyl-terminal hydrolase-related	0.066383	0.186467	0.179069	0.383313	-0.203095	-0.17782	-0.0420728	0.0234296	AT1G53730	SRF6 (STRUBBELIG-RECEPTOR FAMILY 6)	-0.237523	-0.444341	-0.547702	-0.721608	0.00437017	-0.197301	-0.583286	-0.36753	AT1G60790	hypothetical protein	0.389633	0.290902	0.341964	0.234845	0.0879614	0.262211	0.188497	0.315824	AT1G52750	hydrolase, alpha/beta fold family protein	-0.219336	-0.348601	-0.752648	-1.11513	-0.0694513	-0.073021	-0.488157	-0.58161
AT1G52640	pentatricopeptide (PPR) repeat-containing protein	0.142085	0.231227	0.212825	0.382825	-0.0346752	0.0442204	0.159994	0.50107	AT1G53780	26S proteasome AAA-ATPase subunit, putative	-0.367021	-0.323832	-0.521097	-0.440529	-0.236991	-0.419958	-0.0204617	-0.385061	AT1G61170	hypothetical protein	0.308043	0.318441	0.244181	0.169373	0.335875	0.319427	0.313066	0.254766	AT1G52760	esterase/lipase/thioesterase family protein	-0.31897	-0.330125	-0.427121	-0.406755	-0.261851	-0.21722	-0.289901	-0.286639
AT1G52710	cytochrome c oxidase-related	0.123309	0.183556	0.227052	-0.0149615	-0.252703	-0.216453	-0.0540786	-0.46158	AT1G53910	RAP22; DNA binding / transcription factor	0.174155	0.149627	0.197847	0.0265398	0.184935	0.308996	0.215492	0.350899	AT1G61340	F-box family protein	0.163275	0.279421	0.838514	1.01958	0.208977	0.419862	0.495588	0.274624	AT1G52820	2-oxoglutarate-dependent dioxygenase, putative	-3.04321	-4.05805	-5.13345	-4.56	-2.42943	-3.28785	-4.3328	-3.40582
AT1G52905	hypothetical protein	0.255683	0.300471	0.53759	0.932552	0.154646	-0.0238106	0.0687959	0.347323	AT1G54000	myrosinase-associated protein, putative	-0.487082	-0.735076	-0.856634	-0.479756	-0.257852	0.101732	0.0670639	0.399805	AT1G61390	S-locus protein kinase, putative	0.480926	0.792413	0.598115	0.414719	0.653211	0.821326	0.758209	-0.0436712	AT1G53230	TCP3 (TEOSINTE BRANCHED1, CYCLOIDEA AND PCF TRANSCRIPTION FACTOR 3); transcription factor	-0.309538	-0.228363	-0.456259	-0.773899	-0.307108	-0.428682	-0.390387	-0.645751
AT1G53030	cytochrome c oxidase copper chaperone family protein	0.364455	0.355049	0.461353	0.587259	0.194977	0.155355	0.0391628	-0.244158	AT1G54010	myrosinase-associated protein, putative	-0.376562	-0.630476	-0.391646	-0.554036	-0.457185	-0.213545	0.123493	0.213296	AT1G61690	zinc ion binding	0.211165	0.124515	0.077211	0.192855	0.213814	0.236752	0.222531	0.557277	AT1G53300	TTL1 (TETRATRICOPETIDE-REPEAT THIOREDOXIN-LIKE 1); binding	-0.425103	-0.0911603	-0.204677	-0.343877	-0.344952	-0.67456	-0.26881	-1.15673
AT1G53160	SPL4 (SQUAMOSA PROMOTER BINDING PROTEIN-LIKE 4); DNA binding	1.35712	1.76429	1.89049	1.77487	0.941771	0.833382	0.939068	1.05634	AT1G54115	cation exchanger, putative	-0.121413	-0.108953	-0.0575806	-0.0948654	0.0740276	-0.0420508	-0.0307364	-0.0711848	AT1G61810	BGLU45; hydrolase, hydrolyzing O-glycosyl compounds	1.95605	1.25769	2.72608	2.78412	2.73597	2.82597	2.56369	2.48779	AT1G53325	F-box family protein-related	-0.604691	-0.743985	-0.644402	-0.749409	-0.533462	-0.862538	-0.693114	-0.516352
AT1G53210	sodium/calcium exchanger family protein / calcium-binding EF hand family protein	0.170991	0.199959	0.184267	0.168352	0.255551	0.203766	0.000175877	0.0938693	AT1G54170	CID3 (CTC-Interacting Domain 3)	-0.131536	-0.0880361	-0.178203	-0.250146	-0.260415	-0.126995	-0.192628	-0.115311	AT1G61840	DC1 domain-containing protein	0.58298	0.554685	1.68104	2.07307	0.951033	1.75879	1.5511	1.67825	AT1G53340	DC1 domain-containing protein	-0.508243	-0.338513	-0.271187	-0.352706	-0.553752	-0.499838	-0.524255	-0.662691
AT1G53310	ATPPC1 (PHOSPHOENOLPYRUVATE CARBOXYLASE 1); phosphoenolpyruvate carboxylase	0.281042	0.16286	-0.01125	-0.489586	-0.377305	-0.0498612	-0.251231	-0.129651	AT1G54330	ANAC020 (Arabidopsis NAC domain containing protein 20); transcription factor	-0.39295	-0.14543	-0.581162	-0.987631	-0.406825	-0.481972	-0.0529924	-1.14882	AT1G61850	patatin family protein	0.146181	0.141213	0.104399	0.166792	0.142155	0.2258	0.207914	0.312492	AT1G53345	hypothetical protein	-0.339075	-0.268217	-0.350248	-0.610453	-0.344009	-0.383512	-0.274136	-0.402677
AT1G53490	DNA binding	0.00785049	0.0272744	0.0149884	0.030621	0.0363337	0.00117926	0.0192505	0.0219641	AT1G54370	ATNHX5/NHX5 (NA+/H+ ANTIPORTER 5); sodium ion transmembrane transporter/ sodium:hydrogen antiporter	-0.291831	-0.289849	-0.406854	-0.254982	0.0835604	-0.0822035	0.05355	-0.119225	AT1G61930	hypothetical protein	0.407288	0.383879	0.501016	0.829967	0.34672	0.484418	0.292187	1.17516	AT1G53390	ATPase, coupled to transmembrane movement of substances	-0.122297	-0.27222	-0.28534	-0.359777	-0.245675	-0.244301	-0.377174	-0.178849
AT1G53520	chalcone-flavanone isomerase-related	0.130481	0.16614	0.164453	0.127355	-0.133737	-0.317972	-0.290157	-0.517689	AT1G54730	sugar transporter, putative	-0.421565	-0.407314	-0.649208	-0.520905	0.0396519	-0.119754	-0.140727	-0.156301	AT1G62045	hypothetical protein	0.495839	0.603191	0.623039	0.893684	0.638128	0.527594	0.398279	0.526539	AT1G53440	leucine-rich repeat family protein / protein kinase family protein	-0.320191	-0.2808	-0.522959	-0.653891	-0.546548	-0.491898	-0.618296	-0.512367
AT1G53530	signal peptidase I family protein	0.0403315	0.0602933	0.0711728	0.304308	0.192836	-0.046474	0.017479	0.235058	AT1G54890	late embryogenesis abundant protein-related / LEA protein-related	-0.639952	-0.478502	-1.30664	-1.56974	-0.351884	-0.907	-0.590914	-1.27119	AT1G62225	hypothetical protein	1.99112	2.38397	2.45841	2.27821	3.31154	2.92223	3.76581	2.34894	AT1G53450	hypothetical protein	-0.0449581	-0.199029	-0.265733	-0.211625	0.427875	0.31247	0.148947	0.289752
AT1G53645	hydroxyproline-rich glycoprotein family protein	0.346485	0.269869	0.168722	0.434945	-0.00699791	0.302662	0.409359	0.822946	AT1G55030	F-box family protein	-0.926652	-1.0174	-1.61135	-0.781853	-0.268743	-1.19884	-0.946134	-1.15507	AT1G62290	aspartyl protease family protein	0.381565	0.559327	0.91699	1.07424	1.07657	1.27081	1.29535	2.00502	AT1G53480	hypothetical protein	-2.10402	-0.520398	-0.439095	-1.08869	-2.802	-2.44346	-1.46763	-2.64207
AT1G53790	F-box family protein	0.403371	0.543274	0.933179	1.41297	0.367535	0.179322	0.150834	0.638515	AT1G55240	hypothetical protein	-0.0991902	-0.482268	-0.381344	-0.359682	0.197884	0.197962	-0.297704	0.00512253	AT1G62305	hypothetical protein	0.117104	0.150776	0.121709	0.268309	0.325646	0.273938	0.189414	0.44904	AT1G53510	ATMPK18 (ARABIDOPSIS THALIANA MAP KINASE 18); MAP kinase	-0.510363	-0.357786	-0.549701	-0.63514	-0.552711	-0.669225	-0.448023	-0.777407
AT1G53860	remorin family protein	0.0748436	0.170627	0.194843	-0.111765	0.02261	0.201594	0.446979	0.381885	AT1G55310	SR33 (SC35-like splicing factor 33); RNA binding	-0.184816	-0.0755659	-0.066253	-0.166526	-0.224109	-0.0343743	0.0538098	0.189658	AT1G62310	transcription factor jumonji (jmjC) domain-containing protein	0.196753	0.12212	0.32035	0.294446	0.489794	0.228724	0.220617	0.467049	AT1G53570	MAP3KA (Mitogen-activated protein kinase kinase kinase 3); kinase	-0.566444	-0.379271	-0.498371	-0.912538	-0.513173	-0.825703	-0.725072	-0.406129
AT1G54140	TAFII21 (TATA BINDING PROTEIN ASSOCIATED FACTOR 21KDA SUBUNIT); transcription initiation factor	0.194575	0.277906	0.346512	0.166405	-0.129104	0.177126	0.0851591	0.0987458	AT1G55320	ligase	-0.620369	-0.430185	-0.344943	-0.277064	-0.193571	-0.39116	-0.468518	-0.0303164	AT1G62520	hypothetical protein	0.554539	0.526687	0.392634	0.172968	0.142525	0.329709	0.410318	0.382199	AT1G53920	GLIP5 (GDSL-motif lipase 5); carboxylesterase	-0.163097	-0.209386	-0.554991	-0.553219	-0.161946	-0.0422601	-0.112053	-0.211176
AT1G54650	hypothetical protein	0.125924	0.21842	0.149387	0.141702	-0.0435319	0.0415514	0.173174	0.0650057	AT1G55500	ECT4	-0.233815	-0.194046	-0.39785	-0.85522	-0.539362	-0.309765	-0.184565	-0.377363	AT1G62540	flavin-containing monooxygenase family protein / FMO family protein	0.620396	1.12796	1.87068	2.34184	2.10848	1.984	2.0845	2.78364	AT1G53980	polyubiquitin-related	-0.621134	-0.617077	-0.81262	-1.53947	-0.823062	-0.990794	-0.972124	-1.20334
AT1G54860	hypothetical protein	1.16252	0.829058	0.501694	0.664464	-0.0192294	-0.410249	0.604367	0.157325	AT1G55520	TBP2 (TATA binding protein 2); DNA binding / RNA polymerase II transcription factor	-0.153875	-0.186161	-0.304725	-0.395073	0.0813617	-0.0618689	-0.105768	-0.2953	AT1G62560	flavin-containing monooxygenase family protein / FMO family protein	0.442131	0.599755	0.776431	1.15894	1.02924	0.846783	1.03257	1.58975	AT1G53990	GLIP3 (GDSL-motif lipase 3); carboxylesterase/ lipase	-1.65396	-1.65226	-2.51539	-2.82684	-1.00374	-1.40584	-1.32373	-1.99157
AT1G54990	AXR4 (AUXIN RESISTANT 4)	0.0992811	0.0744616	0.136944	0.175181	-0.0273771	-0.0468319	0.122159	0.043963	AT1G55810	uracil phosphoribosyltransferase, putative / UMP pyrophosphorylase, putative / UPRTase, putative	-0.180453	-0.260252	-0.49523	-0.442581	0.11719	0.00608687	0.0374942	0.0947327	AT1G62570	flavin-containing monooxygenase family protein / FMO family protein	0.493151	0.160214	0.501272	1.11861	0.470034	1.12793	0.71262	0.987197	AT1G54000	myrosinase-associated protein, putative	-0.487082	-0.735076	-0.856634	-0.479756	-0.257852	0.101732	0.0670639	0.399805
AT1G55120	ATFRUCT5 (BETA-FRUCTOFURANOSIDASE 5)	0.6222	0.256093	0.24495	0.523362	0.461494	0.501788	0.107819	0.684491	AT1G55880	pyridoxal-5'-phosphate-dependent enzyme, beta family protein	-0.213215	-0.182171	-0.304905	-0.359113	0.0296397	0.0453168	0.0220821	0.0220772	AT1G62620	flavin-containing monooxygenase family protein / FMO family protein	0.326217	0.385505	0.496745	0.830882	1.30179	0.889206	0.702703	1.1807	AT1G54170	CID3 (CTC-Interacting Domain 3)	-0.131536	-0.0880361	-0.178203	-0.250146	-0.260415	-0.126995	-0.192628	-0.115311
AT1G55140	RNA binding / ribonuclease III	0.258936	0.138936	0.0906996	-0.0317996	-0.102356	0.0555431	0.0595483	-0.110148	AT1G55980	hypothetical protein	-0.735438	-0.544546	-0.489141	-0.758791	-0.783125	0.488705	-0.0274869	-0.730488	AT1G62710	BETA-VPE (vacuolar processing enzyme beta); cysteine-type endopeptidase	0.559192	0.753577	1.30051	1.84807	0.802935	0.820343	0.942973	1.0555	AT1G54270	EIF4A-2 (eukaryotic translation initiation factor 4A-2); ATP-dependent helicase	-0.223222	-0.111303	-0.17872	-0.131915	-0.384894	-0.369283	-0.313319	-0.25675
AT1G55330	AGP21 (ARABINOGALACTAN PROTEIN 21)	0.502837	0.592249	0.677251	0.870227	0.467388	0.0533232	0.0118888	-0.498697	AT1G56070	LOS1 (Low expression of osmotically responsive genes 1); translation elongation factor/ translation factor, nucleic acid binding	-0.217082	-0.15484	-0.390653	-0.371689	-0.8175	-0.438155	-0.412148	-0.110377	AT1G62950	leucine-rich repeat transmembrane protein kinase, putative	0.105711	0.161583	0.0232608	0.0224514	-0.0309414	0.0433966	0.200751	0.194003	AT1G54380	spliceosome protein-related	-0.181226	-0.0998573	-0.228556	-0.300018	-0.419704	-0.40189	-0.142821	-0.317984
AT1G55420	EDA11 (embryo sac development arrest 11); protein binding / zinc ion binding	0.281677	0.362032	0.579561	0.451647	0.175799	0.0270096	-0.151533	0.0556333	AT1G56100	pectinesterase inhibitor domain-containing protein	-0.223369	-0.253624	-0.225538	-0.221396	-0.187818	-0.230685	-0.265302	-0.174625	AT1G63245	CLE14 (CLAVATA3/ESR-RELATED 14); receptor binding	0.348376	0.292069	0.743254	0.823288	0.380245	0.590059	0.61892	0.515074	AT1G54660	pseudo	-0.426962	-0.152151	-1.00457	-1.41034	-0.214597	-0.695236	-0.340704	-1.08958
AT1G55535	hypothetical protein	0.190318	0.161154	0.182923	0.492746	0.193718	0.0977569	0.0832837	0.302169	AT1G56160	AtMYB72/MYB72 (myb domain protein 72); DNA binding / transcription factor	-0.605508	-1.37492	-1.11827	-0.769216	1.02978	-2.71979	-3.75726	-3.50536	AT1G63750	ATP binding / nucleoside-triphosphatase/ nucleotide binding / protein binding	0.569625	1.03204	1.70407	1.65871	0.6541	0.485316	0.25791	0.392581	AT1G54710	AtATG18h (Arabidopsis thaliana homolog of yeast autophagy 18 (ATG18) h)	-0.327613	-0.387951	-0.573121	-1.06449	-0.832572	-0.552444	-0.689003	-1.22075
AT1G55546	hypothetical protein	0.524153	0.242208	0.625953	4.23912	3.72797	2.6216	2.10465	3.71143	AT1G56190	phosphoglycerate kinase, putative	-0.199241	-0.132848	-0.267631	-0.189879	0.0386538	0.124688	-0.127464	0.163981	AT1G63770	peptidase M1 family protein	0.26129	0.15015	0.0954226	0.208986	0.318036	0.228134	0.130377	0.326036	AT1G54740	hypothetical protein	-0.409356	-0.484617	-0.718307	-1.05717	-0.252831	-0.247064	-0.610947	-0.747174
AT1G55550	microtubule motor	0.268253	0.381185	0.569102	0.67633	0.0982235	-0.321864	0.179508	-0.0746858	AT1G56240	ATPP2-B13 (Phloem protein 2-B13); carbohydrate binding	-1.5235	-1.66594	-0.998533	-0.798484	-0.461028	-0.533145	-0.272017	-0.65991	AT1G63820	hypothetical protein	0.49524	0.566209	0.63982	0.398571	0.101496	0.542814	0.571315	0.731706	AT1G54780	thylakoid lumen 18 kDa protein	0.0601947	-0.0768896	-0.0713037	-0.306913	0.166705	-0.00583402	-0.144474	-0.0872513
AT1G55675	hypothetical protein	0.17312	0.210395	0.378822	0.575737	0.675774	0.239312	0.356561	0.0358027	AT1G56250	ATPP2-B14 (Phloem protein 2-B14); carbohydrate binding	-0.508409	-0.557137	-0.544364	-0.536701	0.10392	0.0682717	0.149519	-0.126536	AT1G63860	pseudo	-0.30323	1.14102	1.34524	0.9675	-0.474554	-0.717888	-0.497127	-1.2569	AT1G54890	late embryogenesis abundant protein-related / LEA protein-related	-0.639952	-0.478502	-1.30664	-1.56974	-0.351884	-0.907	-0.590914	-1.27119
AT1G56000	amine oxidase-related	0.21553	0.134714	0.256047	0.0977611	-0.000631222	0.0426149	-0.0644433	-0.000336204	AT1G56500	haloacid dehalogenase-like hydrolase family protein	0.107407	-0.250494	-0.675115	-0.977643	0.0592447	-0.0461166	-0.423198	-0.0185991	AT1G63960	hypothetical protein	1.27973	1.46754	1.32598	0.459688	0.682782	1.12539	0.810109	0.805609	AT1G55020	LOX1 (Lipoxygenase 1); lipoxygenase	-1.03783	-0.788927	-0.535043	-0.402305	-0.773205	-1.02244	-1.23729	-0.956004
AT1G56080	hypothetical protein	0.008136	0.0697242	0.0574514	0.0321999	-0.0997239	-0.0567413	-0.230095	-0.0864849	AT1G56630	lipase class 3 family protein	-0.284394	-0.598257	-0.543019	-0.646631	-0.176577	0.461678	0.0929323	0.0872659	AT1G64090	reticulon family protein (RTNLB3)	0.209593	0.0855624	0.0729522	0.0930026	-0.0158197	-0.0420438	0.00949909	0.0476612	AT1G55350	DEK1 (DEFECTIVE KERNEL 1); calcium-dependent cysteine-type endopeptidase/ cysteine-type endopeptidase	-0.0916536	0.328815	0.14603	0.440899	-0.467578	-0.195303	0.542379	-0.423603
AT1G56420	hypothetical protein	0.234108	0.22579	0.348189	0.493803	0.271686	0.0849733	0.0488718	0.017847	AT1G56680	glycoside hydrolase family 19 protein	-1.34668	-0.413667	-1.24049	-1.86909	-0.377847	-0.495675	0.130283	-0.474834	AT1G64110	AAA-type ATPase family protein	0.441916	0.776748	1.37602	2.2245	2.53541	2.71296	3.11006	3.54791	AT1G55380	DC1 domain-containing protein	-0.783529	-0.872337	-1.7796	-2.03762	-0.644981	-0.838864	-1.036	-1.26381
AT1G56423	hypothetical protein	0.171079	0.197442	0.219363	0.212194	0.135312	0.0901048	0.0286088	0.150726	AT1G56700	pyrrolidone-carboxylate peptidase family protein	-0.341685	-0.356647	-0.253101	-0.253517	0.0631483	-0.296962	-0.165671	-0.419419	AT1G64380	AP2 domain-containing transcription factor, putative	0.0537203	-0.0803933	-0.143423	0.328877	0.373921	0.508567	-0.299646	0.784464	AT1G55440	DC1 domain-containing protein	-0.346208	-0.0834454	-0.838907	-1.19758	-0.921416	-0.969085	-0.888833	-1.76945
AT1G56430	nicotianamine synthase, putative	0.201898	1.02437	1.23731	1.85707	0.0991092	-0.809478	-0.334856	-0.822409	AT1G57590	carboxylesterase	-0.708046	-0.669431	-0.506246	-0.258201	0.427656	-0.111618	-0.0955766	-0.136756	AT1G64405	hypothetical protein	0.504564	0.717024	1.05857	1.30676	0.485719	0.407569	0.655231	1.043	AT1G55670	PSAG	-0.0629334	0.0177138	-0.0392406	-0.0401246	-0.0317351	-0.00728732	-0.0596491	0.0568077
AT1G56490	pseudo	1.19102	1.0095	0.997139	1.06921	1.3649	1.33146	0.845155	1.73996	AT1G58180	carbonic anhydrase family protein / carbonate dehydratase family protein	-0.403165	-0.365488	-0.282881	-0.634806	0.164301	0.0346587	-0.290463	-0.422924	AT1G64660	ATMGL; catalytic/ methionine gamma-lyase	0.240708	0.143671	0.484906	1.07808	0.766592	0.780132	1.00566	1.45008	AT1G55730	ATCAX5 (calcium exchanger 5); cation:cation antiporter	-0.175509	-0.240954	-0.198681	-0.186965	-0.0553363	-0.139062	-0.286358	-0.238653
AT1G56555	hypothetical protein	0.534664	0.456888	0.359175	0.3098	0.761193	0.638644	0.308466	0.208977	AT1G58235	hypothetical protein	-0.254708	-0.246564	-0.202366	-0.318843	-0.209803	-0.26846	0.144358	-0.580826	AT1G64750	ATDSS1(I)	0.804743	0.465928	0.500633	0.603717	0.524631	0.584177	0.345556	0.362996	AT1G55760	BTB/POZ domain-containing protein	-0.345121	-0.380502	-0.472939	-0.715386	-0.286335	-0.356601	-0.456389	-0.45174
AT1G57610	hypothetical protein	0.169131	0.182122	0.152985	0.409509	0.197878	0.0688085	0.302741	0.290843	AT1G58320	hypothetical protein	-1.35686	-2.58787	-1.50557	-1.03663	0.98707	2.13916	2.17563	0.93807	AT1G64890	integral membrane transporter family protein	0.377121	0.342608	0.641455	0.776343	0.405274	0.258453	0.16228	0.161061	AT1G55860	UPL1 (UBIQUITIN-PROTEIN LIGASE 1); ubiquitin-protein ligase	-0.586687	-0.175629	-0.618613	-0.909442	-0.801183	-0.827822	-0.416784	-1.16046
AT1G57660	60S ribosomal protein L21 (RPL21E)	0.179687	0.113473	0.144631	0.259304	0.0941887	0.0801261	0.308811	0.229671	AT1G58340	ZF14; transporter	-0.567135	-0.449674	-0.207164	-0.344385	0.265103	0.50957	0.496736	0.522357	AT1G64970	G-TMT (GAMMA-TOCOPHEROL METHYLTRANSFERASE)	0.475841	0.548948	1.05243	1.5536	1.21132	1.00311	0.976283	1.47398	AT1G55960	hypothetical protein	-0.296046	-0.42537	-0.290741	-0.333099	-0.529104	-0.609504	-0.853827	-0.910118
AT1G57860	60S ribosomal protein L21	0.154058	0.104574	0.100673	0.298953	0.102312	0.0891701	0.309094	0.207367	AT1G58440	XF1 (SQUALENE EPOXIDASE 1); oxidoreductase	-0.14733	-0.16366	-0.207592	-0.442685	-0.174242	-0.0199926	-0.211874	-0.189162	AT1G65320	CBS domain-containing protein	0.263054	0.0564619	0.0690473	0.0417772	0.0547199	0.176673	0.0319597	0.175977	AT1G55970	ATHPCAT2/HAC4 (HISTONE ACETYLTRANSFERASE OF THE CBP FAMILY 4); histone acetyltransferase	0.10251	-0.0408975	-0.218883	-0.349582	-0.253425	-0.165348	-0.175099	-0.319701
AT1G58025	DNA binding	0.111619	0.155418	0.172686	0.273612	-0.0420946	0.0178056	0.0565821	-0.00560586	AT1G59580	ATMPK2 (MITOGEN-ACTIVATED PROTEIN KINASE HOMOLOG 2); MAP kinase/ kinase	-0.0541385	-0.137296	-0.151231	-0.361684	-0.0595119	0.062322	-0.0528927	-0.0100176	AT1G65410	ATNAP11 (ARABIDOPSIS THALIANA NON-INTRINSIC ABC PROTEIN 11)	0.318492	0.287164	0.21648	-0.0561632	0.0402364	0.19697	0.0484125	0.185003	AT1G56020	hypothetical protein	-0.445129	-0.397674	-0.428537	-0.724408	-0.618971	-0.362752	-0.123435	-0.388897
AT1G58470	ATRBP1 (ARABIDOPSIS THALIANA RNA-BINDING PROTEIN 1); RNA binding	0.0812939	0.238545	0.263029	0.343408	0.160299	0.155815	0.134762	0.261685	AT1G59660	nucleoporin family protein	-0.215522	-0.237924	-0.797567	-1.09237	0.0852726	0.185083	0.143117	0.188004	AT1G65486	hypothetical protein	0.326696	1.38247	1.95658	1.62996	0.184195	0.765332	0.90902	0.854051	AT1G56140	leucine-rich repeat family protein / protein kinase family protein	-0.319871	-0.238552	-0.323194	-0.443726	-0.58891	-0.470535	-0.448797	-0.362496
AT1G58480	GDSL-motif lipase, putative	0.960322	0.588287	0.996586	1.44563	0.745551	0.468931	-0.0229056	0.501165	AT1G59950	aldo/keto reductase, putative	-0.362896	-0.972225	-2.06792	-2.02053	-1.7897	-0.463156	-1.21081	-1.20167	AT1G65490	hypothetical protein	1.46255	2.77195	3.51116	3.56503	1.23443	1.4642	1.38372	1.2947	AT1G56240	ATPP2-B13 (Phloem protein 2-B13); carbohydrate binding	-1.5235	-1.66594	-0.998533	-0.798484	-0.461028	-0.533145	-0.272017	-0.65991
AT1G58590	miscRNA	0.40416	0.234662	0.491986	0.575446	0.181281	0.0495305	0.150801	-0.0987437	AT1G59990	DEAD/DEAH box helicase, putative (RH22)	-0.0659826	-0.204559	-0.277034	-0.094326	-0.306683	-0.136813	-0.0224951	0.232446	AT1G65500	hypothetical protein	0.813867	1.41043	2.74497	3.09914	1.06988	2.92435	3.56634	3.72001	AT1G57560	AtMYB50 (myb domain protein 50); DNA binding / transcription factor	-0.568383	-0.92116	-1.03158	-1.28787	-0.726467	-0.513539	-1.10347	-1.01656
AT1G58725	GDSL-motif lipase, putative	0.929973	0.592933	0.692298	0.644159	0.0270909	0.0374281	-0.463241	-0.228561	AT1G60525	miscRNA	-0.278355	-0.109009	-0.280033	-0.0629887	0.273594	-0.0669575	0.456865	-0.0479634	AT1G65670	CYP702A1 (CYTOCHROME P450, FAMILY 702, SUBFAMILY A, POLYPEPTIDE 1); oxygen binding	1.17555	0.905024	1.05833	0.789339	0.970383	0.496724	0.336732	1.18629	AT1G57570	jacalin lectin family protein	-0.453897	-0.752269	-1.26444	-1.7434	-0.846932	-0.622098	-1.22286	-1.37926
AT1G58807	disease resistance protein (CC-NBS-LRR class), putative / PRM1 homolog, putative	0.239107	0.296108	0.378245	0.367629	0.151101	0.146234	0.17894	0.193471	AT1G60545	misc_RNA	-0.0288757	-0.0565301	-0.135211	-0.10207	0.18161	0.115547	0.283697	0.319927	AT1G65680	ATEXPB2 (ARABIDOPSIS THALIANA EXPANSIN B2)	1.5405	1.36066	1.75573	1.49484	1.48671	1.27503	1.73751	2.67835	AT1G57670	Toll-Interleukin-Resistance (TIR) domain-containing protein	-0.377185	-0.579191	-0.555427	-1.26638	-0.178809	-0.277121	-0.608426	-0.483664
AT1G59030	carboxylesterase/ lipase	1.15253	0.748876	0.962001	0.921002	0.345367	0.259159	-0.209082	0.208752	AT1G60610	protein binding / zinc ion binding	-0.190536	-0.183652	-0.257434	-0.12952	0.252004	-0.074104	0.112344	0.232848	AT1G65860	flavin-containing monooxygenase family protein / FMO family protein	0.603418	0.686337	0.984674	1.19535	1.06716	0.952432	0.790285	1.35231	AT1G57720	elongation factor 1B-gamma, putative / eEF-1B gamma, putative	-0.0891092	-0.120241	-0.311245	-0.09657	-0.112609	-0.0659349	0.00943453	0.120036
AT1G59124	disease resistance protein (CC-NBS-LRR class), putative / PRM1 homolog, putative	0.0878215	0.202225	0.157141	0.0701523	-0.18689	0.00853619	0.0103294	-0.11037	AT1G60630	leucine-rich repeat family protein	-0.0272425	-0.0808103	-0.193507	-0.639619	-0.214454	0.0311428	0.0706936	0.0557599	AT1G65880	BZO1; benzoate-CoA ligase	0.236807	0.413983	1.8893	1.7208	-0.487724	0.112974	0.301609	0.353964	AT1G57770	amine oxidase family	-0.585018	-0.539514	-0.714389	-0.762583	-0.330915	-0.645744	-0.798203	-0.68008
AT1G59510	CF9	0.170111	0.115256	0.112343	0.145178	0.15161	0.157256	0.361882	0.440255	AT1G60690	aldo/keto reductase family protein	-0.144714	-0.139172	-0.207599	-0.229667	-0.272642	-0.118559	-0.190215	-0.0445772	AT1G65890	acyl-activating enzyme 12 (AAE12)	2.11077	2.03906	3.57222	3.11262	1.34461	2.07503	1.9352	2.77354	AT1G57980	purine permease-related	-0.34318	-0.392411	-0.395458	-0.584172	-0.435044	-0.68031	-0.693152	-1.15536
AT1G59530	ATBZIP4 (ARABIDOPSIS THALIANA BASIC LEUCINE-ZIPPER); DNA binding / transcription factor	2.0301	2.4976	3.01003	3.1616	2.03212	1.69099	1.78147	0.890225	AT1G60810	ACLA-2 (ATP-citrate lyase A-2)	-0.0545657	-0.149988	-0.296148	-0.420462	-0.151537	-0.0348633	-0.102831	0.0141309	AT1G65900	hypothetical protein	0.491315	0.553658	0.647378	0.319817	0.353614	0.44383	0.545073	0.447321	AT1G58100	TCP family transcription factor, putative	-0.362877	-0.172029	-0.101084	-0.0302297	-0.395133	-0.348629	-0.17829	-0.200247
AT1G59600	ZCW7	0.308552	0.188229	0.274346	0.249952	-0.052522	0.0274471	0.145302	0.237083	AT1G60860	ARF GTPase-activating domain-containing protein	-0.264501	-0.135311	-0.386285	-0.445346	-0.246763	-0.190442	0.0991324	-0.46508	AT1G66050	VIM2 (VARIANT IN METHYLATION 2); protein binding / zinc ion binding	0.350254	0.355941	0.107174	0.0903571	0.302188	0.337409	0.392917	0.688481	AT1G58120	hypothetical protein	-1.29742	-2.06787	-1.39246	-1.73752	-1.65289	-1.48743	-2.06813	-2.17457
AT1G59700	ATGSTU16 (Arabidopsis thaliana Glutathione S-transferase (class tau) 16); glutathione transferase	0.452873	0.306693	0.922863	1.12126	0.551533	0.577443	0.380356	0.654364	AT1G60900	U2 snRNP auxiliary factor large subunit, putative	-0.16716	-0.0611326	-0.181654	-0.274216	-0.411801	-0.0699651	-0.0238687	-0.121046	AT1G66200	ATGSR2 (Arabidopsis thaliana glutamine synthase clone R2); glutamate-ammonia ligase	0.137818	0.221877	0.631423	1.16672	0.164027	0.0076249	-0.141144	0.0738685	AT1G58130	pseudo	-1.20534	-1.65837	-1.66011	-1.57196	-1.80048	-1.07429	-1.69862	-1.21323
AT1G59730	ATH7 (thioredoxin H-type 7); thiol-disulfide exchange intermediate	0.217136	0.35442	0.256627	0.162596	0.103179	-0.338964	-0.304723	-0.755226	AT1G60960	IRT3 (Iron regulated transporter 3); cation transmembrane transporter/ metal ion transmembrane transporter	-0.0595518	-0.309338	-1.13676	-1.12907	0.00275176	-0.409687	-0.898423	-0.73403	AT1G66240	ATX1; metal ion binding	0.140251	0.216163	0.380675	0.505292	0.214483	0.201247	0.270271	0.152515	AT1G58190	leucine-rich repeat family protein	-0.205558	0.0996812	-0.0656842	0.0590989	-0.291747	-0.641771	-0.588431	-0.657725
AT1G60460	hypothetical protein	1.90218	1.76338	2.11054	1.93371	1.53393	1.76286	1.49461	1.66283	AT1G61080	proline-rich family protein	-0.220303	-0.738792	-1.93541	-4.08643	-0.905573	-0.0859032	-1.05567	-0.326811	AT1G66400	calmodulin-related protein, putative	0.167361	0.256608	0.708728	1.80191	0.947495	0.698573	0.467073	0.622014	AT1G58210	EMB1674 (EMBRYO DEFECTIVE 1674)	-0.164587	-0.215063	-0.353646	-0.490733	-0.0750988	-0.159992	-0.123099	-0.163018
AT1G60710	ATB2; oxidoreductase	0.107895	0.259658	0.329863	0.448257	0.248043	0.17457	0.173882	0.494882	AT1G61190	disease resistance protein (CC-NBS-LRR class), putative	-0.310637	-0.236345	-0.260132	-0.437223	-0.138894	-0.14685	-0.418551	-0.120399	AT1G66410	CAM4 (CALMODULIN 4); calcium ion binding	0.137718	0.194203	0.1815	0.112705	0.114551	0.226546	0.262201	0.299708	AT1G58290	HEMA1; glutamyl-tRNA reductase	-0.0632361	-0.303936	-0.151142	-0.263231	-0.262019	-0.122149	-0.139708	-0.116438
AT1G60790	hypothetical protein	0.389633	0.290902	0.341964	0.234845	0.0879614	0.262211	0.188497	0.315824	AT1G61230	pseudo	-0.787468	-0.496956	-1.40077	-0.888414	-0.643506	-0.411009	-0.127567	-0.719818	AT1G66430	pfkB-type carbohydrate kinase family protein	0.519142	0.535311	0.543757	-0.296427	0.279257	0.608773	0.645617	0.621971	AT1G58370	RXF12; hydrolase, hydrolyzing O-glycosyl compounds	-0.915454	-1.12057	-2.00653	-2.20725	-1.15401	-0.908253	-1.34844	-1.10937
AT1G60890	phosphatidylinositol-4-phosphate 5-kinase family protein	0.357434	0.405702	0.519969	0.469785	0.0852236	0.223791	0.0804599	0.236958	AT1G61270	lysine and histidine specific transporter, putative	-0.985694	-1.59716	-2.70333	-2.33751	0.167795	0.477171	-0.611067	-0.219291	AT1G66510	AAR2 protein family	0.125093	0.169854	0.060209	-0.226933	-0.327979	-0.0549416	-0.0365277	-0.059811	AT1G58410	disease resistance protein (CC-NBS-LRR class), putative	-0.695301	-0.559126	-0.756764	-0.707585	-0.866698	-1.17059	-1.19903	-1.22757
AT1G60930	ATRECQ4B/RECQL4B (ARABIDOPSIS RECQ HELICASE L4B); DNA helicase	0.299316	0.273835	0.393139	0.280381	0.000766406	-0.103015	-0.263411	-0.403788	AT1G61280	hypothetical protein	-0.174234	-0.166813	-0.274409	-0.397487	0.0540915	-0.16497	-0.124783	-0.154849	AT1G66760	MATE efflux family protein	0.571724	0.984165	-0.611776	0.751354	0.891454	0.659684	0.949203	-1.68263	AT1G58643	hypothetical protein	-0.383447	-0.782316	-1.36056	-2.39323	-1.08927	-1.30492	-1.80672	-2.36007
AT1G61050	alpha 1,4-glycosyltransferase family protein / glycosyltransferase sugar-binding DXD motif-containing protein	0.192969	0.109765	0.365932	0.179801	-0.116472	0.10962	-0.224267	0.235125	AT1G61290	SYP124 (syntaxin 124); SNAP receptor	-0.478057	-0.78572	-1.02526	-1.37443	-0.408537	-0.282982	0.0200687	-0.404931	AT1G66780	MATE efflux family protein	0.896447	0.978049	1.45949	1.5317	1.15966	1.47817	1.34803	1.41539	AT1G59171	hypothetical protein	-0.0988919	-0.107359	-0.136853	0.0628089	-0.153959	0.0369276	-0.153965	-0.1234
AT1G61065	hypothetical protein	0.277706	0.232431	0.479172	0.342473	0.17661	0.242086	0.278863	-0.0191954	AT1G61300	disease resistance protein (NBS-LRR class), putative	-0.177835	-0.220985	-0.303363	-0.41371	-0.0236891	0.00216921	-0.121613	0.0726039	AT1G66830	leucine-rich repeat transmembrane protein kinase, putative	0.883394	1.23026	1.49325	1.57051	0.863855	1.31642	1.7394	1.95888	AT1G59740	proton-dependent oligopeptide transport (POT) family protein	-0.14624	0.0927041	-0.207011	-0.145106	0.205419	-0.473294	-0.696771	-0.589042
AT1G61380	S-locus protein kinase, putative	0.0944896	0.226159	0.604917	0.981833	0.332308	0.0570448	0.0461883	0.400702	AT1G61480	S-locus protein kinase, putative	-0.643559	-0.554414	-0.536532	-0.492185	-0.0431799	-0.608893	-0.59844	-0.264628	AT1G66870	glycosyl hydrolase family protein 17	1.16741	1.28735	2.07396	2.04846	1.14183	1.90682	0.913604	1.18463	AT1G59780	disease resistance protein (CC-NBS-LRR class), putative	-1.0138	-1.0729	-1.87118	-2.28056	-0.819641	-0.800741	-0.862723	-1.12945
AT1G61415	hypothetical protein	0.566973	0.749296	0.686381	0.479662	-0.0148847	0.253413	0.47713	0.143104	AT1G61580	ARP2/RPL3B (ARABIDOPSIS RIBOSOMAL PROTEIN 2); structural constituent of ribosome	-0.429826	-0.29453	-0.665015	-0.969042	-0.595798	-0.273748	0.0156196	-0.339226	AT1G66920	serine/threonine protein kinase, putative	0.288752	0.802491	1.67904	1.753	0.210178	0.908861	0.779715	1.05377	AT1G59870	PDR8/PEN3 (PLEIOTROPIC DRUG RESISTANCE8); ATPase, coupled to transmembrane movement of substances / cadmium ion transmembrane transporter	-0.239313	-0.208347	-0.334183	-0.51024	-0.512416	-0.465473	-0.445023	-0.45799
AT1G61570	TIM13; P-P-bond-hydrolysis-driven protein transmembrane transporter	0.187152	0.204161	0.201786	0.297224	0.076946	0.100389	0.40467	0.247404	AT1G61760	harpin-induced protein-related / HIN1-related / harpin-responsive protein-related	-0.16248	-0.138541	-0.28538	-0.372782	0.174452	-0.0537806	-0.0917555	0.0957037	AT1G67100	LBD40 (LOB DOMAIN-CONTAINING PROTEIN 40)	3.26016	3.61777	4.88353	5.14331	2.71689	3.37184	4.17674	3.79103	AT1G59940	ARR3 (RESPONSE REGULATOR 3); transcription regulator/ two-component response regulator	-1.01615	-1.3944	-2.09733	-2.25777	-0.840095	-0.634941	-1.17873	-1.44606
AT1G61610	S-locus lectin protein kinase family protein	0.668604	0.903678	2.79992	2.51632	0.339322	0.664271	0.19725	0.427104	AT1G61820	BGLU46; hydrolase, hydrolyzing O-glycosyl compounds	1.26315	1.15857	0.911486	0.82808	0.740906	1.36136	1.52418	0.920678	AT1G67105	misc_RNA	1.95381	2.106	2.61417	2.03224	0.775228	0.936116	1.41995	1.81236	AT1G60095	jacalin lectin family protein	-0.332033	-0.355898	-0.562138	-0.949108	-0.830596	-0.745742	-1.12977	-0.943299
AT1G61770	DNAJ heat shock N-terminal domain-containing protein	0.15839	0.145496	0.14483	0.443527	0.316233	0.0926623	0.156827	0.289122	AT1G61960	mitochondrial transcription termination factor-related / mTERF-related	-0.0686841	-0.0418589	-0.0689403	-0.138528	-0.0477755	-0.149476	-0.0812063	-0.0255236	AT1G67195	MIR414	0.320713	0.174098	0.4102	0.606219	0.31513	0.389638	0.12627	0.36881	AT1G60170	EMB1220 (EMBRYO DEFECTIVE 1220)	-0.153866	-0.187296	-0.217333	-0.387853	-0.330365	-0.189298	-0.184853	-0.229941
AT1G61980	mitochondrial transcription termination factor-related / mTERF-related	0.118801	0.107632	0.229692	0.162482	-0.214073	-0.0704221	-0.104357	0.030214	AT1G62360	STM (SHOOT MERISTEMLESS); transcription factor	-0.134853	-0.380924	-0.119878	-0.618424	0.0267508	-0.220075	-0.678431	-0.540078	AT1G67300	hexose transporter, putative	0.606954	0.810598	1.2978	1.35404	0.609661	0.760126	0.872569	1.06936	AT1G60680	AGD2 (ARF-GAP DOMAIN 2); aldo-keto reductase	-0.382276	-0.342157	-0.358622	-0.354985	-0.604391	-0.488064	-0.489681	-0.323724
AT1G62030	DC1 domain-containing protein	0.276984	0.164273	0.175208	0.155304	-0.142505	0.271435	0.258748	0.56426	AT1G62500	protease inhibitor/seed storage/lipid transfer protein (LTP) family protein	-0.151521	-0.121967	-0.153188	-0.242346	-0.256122	0.0347434	-0.274614	-0.478025	AT1G67365	misc_RNA	0.493517	0.397334	0.692306	0.580404	0.397375	0.712646	0.571647	0.690415	AT1G60800	NIK3 (NSP-INTERACTING KINASE 3); kinase	-0.200846	-0.276228	-0.47503	-0.569294	-0.24627	-0.410351	-0.370265	-0.82531
AT1G62130	AAA-type ATPase family protein	0.206821	0.262856	0.160314	0.170043	0.0556982	0.040743	0.237101	0.17835	AT1G62510	protease inhibitor/seed storage/lipid transfer protein (LTP) family protein	-1.04086	-1.46289	-1.24017	-1.33653	0.626182	0.105761	0.0222406	-0.501108	AT1G67370	ASY1 (ASYNAPTIC 1); DNA binding	0.225413	0.576235	0.875198	0.743877	0.637703	0.380455	0.631513	0.978354	AT1G60940	SNRK2-10/SNRK20/SRK2B (SNF1-RELATED PROTEIN KINASE 20); kinase	-0.168765	-0.305125	-0.180311	-0.318787	-0.389754	-0.276237	-0.538464	-0.599899
AT1G62730	hypothetical protein	0.141643	0.127607	0.346812	0.348936	-0.0953844	0.171457	0.17706	0.335589	AT1G62640	KAS III (3-KETOACYL-ACYL CARRIER PROTEIN SYNTHASE III); 3-oxoacyl-[acyl-carrier-protein] synthase	-0.0617003	-0.1352	-0.370422	-0.381312	-0.174878	-0.109738	-0.0358553	-0.136019	AT1G67600	hypothetical protein	0.462186	0.458613	1.14137	1.02809	0.606735	0.417291	0.250451	0.35002	AT1G61130	SCPL32; serine carboxypeptidase	-1.29626	-1.34964	-2.6966	-4.08531	-2.29102	-2.90351	-4.07197	-5.01482
AT1G62760	invertase/pectin methylesterase inhibitor family protein	0.966094	0.996984	1.40669	1.06864	-0.0443334	0.276066	-0.0531492	-0.431687	AT1G62800	ASP4 (ASPARTATE AMINOTRANSFERASE 4); catalytic/ pyridoxal phosphate binding / transaminase/ transferase, transferring nitrogenous groups	-0.392671	-0.402576	-0.538224	-0.691148	-0.307681	-0.126901	-0.244663	-0.13719	AT1G67760	ATP binding / protein binding / unfolded protein binding	0.558637	0.649874	0.549334	0.556163	0.237792	0.462579	0.604131	0.383594	AT1G61140	EDA16 (embryo sac development arrest 16)	-0.288554	0.09348	-0.125828	-0.601586	-0.618174	-0.275168	-0.160972	-0.94461
AT1G62780	hypothetical protein	0.369689	0.251825	0.0998039	0.0377038	0.0919745	0.193583	0.0202293	-0.0505062	AT1G62810	copper amine oxidase, putative	-0.271544	-0.239689	-0.22856	-0.118155	0.349683	0.281237	0.352938	0.499576	AT1G67830	ATFXG1 (ALPHA-FUCOSIDASE 1); alpha-L-fucosidase/ carboxylesterase	0.400882	0.435294	0.503314	0.391872	0.295527	0.325588	0.455509	0.447666	AT1G61190	disease resistance protein (CC-NBS-LRR class), putative	-0.310637	-0.236345	-0.260132	-0.437223	-0.138894	-0.14685	-0.418551	-0.120399
AT1G62840	hypothetical protein	0.207208	0.226796	0.255061	0.128481	-0.0890698	0.279003	-0.0132745	0.158324	AT1G62910	pentatricopeptide (PPR) repeat-containing protein	-0.212164	-0.186818	-0.307483	-0.241224	0.06647	-0.339258	-0.310235	-0.294119	AT1G67850	hypothetical protein	0.455338	0.42137	0.503104	0.698963	0.19607	0.509495	0.440405	0.892132	AT1G61300	disease resistance protein (NBS-LRR class), putative	-0.177835	-0.220985	-0.303363	-0.41371	-0.0236891	0.00216921	-0.121613	0.0726039
AT1G63250	DEAD box RNA helicase, putative	0.0755148	0.118337	0.0984178	0.270518	-0.0563891	0.00716479	0.234112	0.512949	AT1G62940	4-coumarate--CoA ligase family protein / 4-coumaroyl-CoA synthase family protein	-0.568736	-0.905534	-1.74912	-2.29488	-0.821026	0.560395	0.0339521	-0.0771289	AT1G67920	hypothetical protein	0.214615	0.212378	0.378476	0.283014	0.342472	0.513411	0.191406	0.50705	AT1G61360	S-locus lectin protein kinase family protein	-0.429316	-0.388269	-0.65293	-1.20304	-0.668435	-0.588217	-0.833626	-0.638791
AT1G63460	glutathione peroxidase, putative	0.13043	0.200985	0.405367	0.254262	0.180202	0.136704	0.0636481	-0.0281628	AT1G62990	KNAT7 (Knotted-like Arabidopsis thaliana); DNA binding / transcription factor	-0.301023	-0.527009	-0.522508	-0.678881	0.00719003	-0.209432	-0.499754	-0.181112	AT1G68110	epsin N-terminal homology (ENTH) domain-containing protein / clathrin assembly protein-related	0.98606	0.612206	0.796708	0.473722	0.690861	0.790244	0.536568	0.865888	AT1G61420	S-locus lectin protein kinase family protein	-0.516088	-0.439422	0.122673	-0.35549	-0.58256	-0.564064	-0.374226	-0.711163
AT1G63610	hypothetical protein	0.115953	0.238416	0.203207	0.023131	0.0271621	0.0521635	0.0135669	-0.120726	AT1G63010	SPX (SYG1/Pho81/XPR1) domain-containing protein	-0.18585	-0.338869	-0.31032	-0.484644	-0.179816	-0.188356	-0.368864	-0.19745	AT1G68185	ubiquitin-related	0.375627	0.269805	0.312532	0.312645	0.209241	0.202717	0.231672	0.392034	AT1G61475	pseudo	-0.32075	-0.289246	-0.503034	-0.686789	-0.394361	-0.243159	-0.339654	-0.147745
AT1G63710	CYP86A7 (cytochrome P450, family 86, subfamily A, polypeptide 7); oxygen binding	0.834216	0.820338	0.932506	0.576979	0.28453	0.317336	-0.0850415	0.0261354	AT1G63120	ATRBL2 (ARABIDOPSIS THALIANA RHOMBOID-LIKE 2); serine-type endopeptidase	-0.00697541	0.0174948	0.0147979	-0.134013	0.338437	0.168525	-0.0709117	0.0595098	AT1G68430	hypothetical protein	0.146924	0.330395	0.438099	0.130953	0.170671	0.175356	0.368308	0.217644	AT1G61500	S-locus protein kinase, putative	-0.575292	-0.688435	-0.869019	-0.540353	-0.251683	-0.639986	-0.611137	-0.38864
AT1G63850	PRLI-interacting factor-related	0.159965	0.0412699	-0.365153	-0.250682	-0.339201	0.0795729	0.13968	0.445401	AT1G63150	pentatricopeptide (PPR) repeat-containing protein	-0.466675	-0.274312	-0.349722	-0.525608	0.0459721	-0.6118	-0.235551	-0.828407	AT1G68500	hypothetical protein	0.372524	0.42564	0.673706	1.11093	0.685557	0.616146	0.662835	0.690516	AT1G61520	LHCA3 (Photosystem I light harvesting complex gene 3); chlorophyll binding	0.0724077	-0.146842	-0.208941	-0.54159	-0.0623583	-0.0385783	-0.15663	-0.0430185
AT1G63855	hypothetical protein	0.686407	0.591532	0.664219	0.722515	0.289179	0.45824	0.306959	0.281103	AT1G63230	pentatricopeptide (PPR) repeat-containing protein	-0.173809	-0.0964659	-0.341479	-0.520116	-0.0691377	-0.0919227	-0.0182265	-0.252223	AT1G68530	CUT1 (CUTICULAR 1); acyltransferase/ catalytic	0.317526	0.085882	0.578867	0.529117	0.384633	0.555331	0.180575	0.457427	AT1G61550	S-locus protein kinase, putative	-0.844198	-0.645848	-0.912704	-1.1725	-0.858155	-1.06252	-0.982165	-0.681503
AT1G63940	monodehydroascorbate reductase, putative	0.360275	0.423051	0.268606	0.247504	-0.120175	0.299642	0.202777	0.384303	AT1G63400	pentatricopeptide (PPR) repeat-containing protein	-0.105489	-0.0605033	-0.229043	-0.190297	0.13636	-0.111223	-0.206143	-0.0903857	AT1G68570	proton-dependent oligopeptide transport (POT) family protein	0.684479	0.8936	1.43822	1.91841	1.08069	1.12455	1.32986	1.70501	AT1G61575	ATP binding / protein kinase	-0.911612	-0.991479	-1.37108	-1.96337	-0.427017	-1.38716	-1.41471	-1.9757
AT1G63950	heavy-metal-associated domain-containing protein	0.985207	1.34813	2.25888	2.95304	0.333731	0.832677	1.50451	2.46249	AT1G63430	leucine-rich repeat transmembrane protein kinase, putative	-0.161842	-0.12351	-0.274599	-0.664768	-0.448505	-0.168774	-0.253863	-0.500012	AT1G68600	hypothetical protein	0.694944	0.489069	1.04047	1.09817	0.334256	0.478493	0.245833	0.444238	AT1G61860	protein kinase, putative	-0.367654	-0.0922018	-0.401449	-0.123696	-0.0589271	-0.171923	0.119376	-1.01715
AT1G63970	ISPF (Homolog of E. coli ispF (isoprenoids F)); 2-C-methyl-D-erythritol 2,4-cyclodiphosphate synthase	0.179134	0.172831	0.358179	0.347508	0.263376	-0.0271347	-0.0593292	0.0255092	AT1G63450	catalytic	-0.203162	-0.705361	-1.52098	-1.76146	-0.11985	0.188356	-0.408839	-0.293052	AT1G68710	haloacid dehalogenase-like hydrolase family protein	0.256267	0.147994	0.0705497	0.116818	0.233118	0.462676	0.22693	0.501803	AT1G62200	proton-dependent oligopeptide transport (POT) family protein	-0.194568	-0.330737	-0.290246	-0.379663	-0.289537	-0.361128	-0.569552	-0.51527
AT1G64010	serpin, putative / serine protease inhibitor, putative	0.401444	0.265156	0.350925	0.238464	0.609985	0.425973	0.769538	0.233732	AT1G63500	protein kinase-related	-0.180033	-0.173328	-0.229597	0.12425	0.196591	-0.154465	-0.254257	0.346527	AT1G68760	ATNUDT1 (Arabidopsis thaliana Nudix hydrolase homolog 1); dihydroneopterin triphosphate pyrophosphohydrolase/ hydrolase	0.127145	0.166808	0.238165	0.251863	0.420572	0.290815	0.312863	0.273453	AT1G62380	ACO2 (ACC OXIDASE 2)	-0.434371	-0.503322	-0.575941	-0.736785	-0.750189	-0.740673	-0.843737	-0.644641
AT1G64080	hypothetical protein	0.149295	0.291296	0.259844	0.100952	0.0343485	0.111753	0.382596	-0.112024	AT1G63520	hypothetical protein	-0.184284	-0.214507	-0.704805	-1.53529	-0.0791517	-0.0551217	-0.278439	-0.397104	AT1G68795	CLE12 (CLAVATA3/ESR-RELATED 12); receptor binding	0.263484	0.335109	0.732193	1.07138	0.643847	0.339688	0.566418	0.645973	AT1G62390	octicosapeptide/Phox/Bem1p (PB1) domain-containing protein / tetratricopeptide repeat (TPR)-containing protein	-0.0944575	-0.115796	-0.278585	-0.581944	-0.46709	-0.254149	-0.200562	-0.414814
AT1G64090	reticulon family protein (RTNLB3)	0.209593	0.0855624	0.0729522	0.0930026	-0.0158197	-0.0420438	0.00949909	0.0476612	AT1G63600	protein kinase-related	-0.512558	-1.68657	-1.98743	-2.19686	-0.192017	0.208178	-0.556528	-2.30831	AT1G69020	prolyl oligopeptidase family protein	0.44164	0.372079	0.289627	0.337544	0.146438	0.559534	0.773264	0.896063	AT1G62480	vacuolar calcium-binding protein-related	-0.583453	-0.759039	-0.918675	-1.35143	-0.132885	-0.165288	-0.334666	-0.687666
AT1G64390	ATGH9C2 (ARABIDOPSIS THALIANA GLYCOSYL HYDROLASE 9C2); hydrolase, hydrolyzing O-glycosyl compounds	0.58604	0.641724	0.832019	0.568952	-0.522091	0.0746511	0.477419	0.258104	AT1G63690	protease-associated (PA) domain-containing protein	-0.0115337	-0.0598083	-0.173799	-0.404491	-0.107825	-0.0952103	-0.0601493	-0.315355	AT1G69140	pseudo	1.75677	1.64174	1.46356	1.14163	1.68889	1.80805	1.25988	1.609	AT1G62500	protease inhibitor/seed storage/lipid transfer protein (LTP) family protein	-0.151521	-0.121967	-0.153188	-0.242346	-0.256122	0.0347434	-0.274614	-0.478025
AT1G64520	RPN12A (REGULATORY PARTICLE NON-ATPASE 12A); peptidase	0.101143	0.06405	0.162646	0.147205	-0.11383	0.0163092	0.0514168	-0.0719209	AT1G63720	hypothetical protein	-0.404564	-0.428937	-0.160894	-0.0353813	0.0878766	0.22004	-0.0221865	0.133512	AT1G69260	hypothetical protein	0.984106	0.992238	1.3311	1.21388	1.66157	2.12265	1.90897	2.38464	AT1G62800	ASP4 (ASPARTATE AMINOTRANSFERASE 4); catalytic/ pyridoxal phosphate binding / transaminase/ transferase, transferring nitrogenous groups	-0.392671	-0.402576	-0.538224	-0.691148	-0.307681	-0.126901	-0.244663	-0.13719
AT1G64740	TUA1 (ALPHA-1 TUBULIN)	0.357687	0.176862	0.372772	0.389349	0.0672114	0.12137	-0.263946	0.12385	AT1G63800	UBC5 (UBIQUITIN-CONJUGATING ENZYME 5); ubiquitin-protein ligase	-0.23076	-0.408309	-0.40495	-0.461853	-0.0633566	-0.0277374	-0.17705	-0.197339	AT1G69270	RPK1 (RECEPTOR-LIKE PROTEIN KINASE 1); kinase	0.335917	0.334345	0.54238	0.521259	0.577539	0.663682	0.553256	0.700937	AT1G62930	hypothetical protein	-0.322422	-0.313066	-0.393765	-0.500064	-0.0871405	-0.417099	-0.566428	-0.471653
AT1G64750	ATDSS1(I)	0.804743	0.465928	0.500633	0.603717	0.524631	0.584177	0.345556	0.362996	AT1G63855	hypothetical protein	0.686407	0.591532	0.664219	0.722515	0.289179	0.45824	0.306959	0.281103	AT1G69295	beta-1,3-glucanase-related	0.110974	0.272102	0.305116	0.531112	0.485937	0.368681	0.494179	0.686924	AT1G62975	basic helix-loop-helix (bHLH) family protein (bHLH125)	-0.260937	-0.300504	-0.205883	-0.647718	-0.209799	-0.249705	-0.352392	-0.845908
AT1G64760	glycosyl hydrolase family 17 protein	0.232912	0.734873	0.910341	1.03808	0.293797	-0.151378	-0.0890202	-0.0670961	AT1G64040	TOPP3 (Type one serine/threonine protein phosphatase 3); protein serine/threonine phosphatase	-0.0771965	-0.121813	-0.122961	-0.225912	-0.201551	-0.105892	-0.126051	-0.0477853	AT1G69390	ATMINE1 (ARABIDOPSIS HOMOLOGUE OF BACTERIAL MINE 1); protein binding	0.166659	0.143009	0.279259	0.412243	0.441076	0.2356	0.266232	0.409093	AT1G62990	KNAT7 (Knotted-like Arabidopsis thaliana); DNA binding / transcription factor	-0.301023	-0.527009	-0.522508	-0.678881	0.00719003	-0.209432	-0.499754	-0.181112
AT1G64810	APO1 (ACCUMULATION OF PHOTOSYSTEM ONE 1)	0.0654936	0.208517	0.433521	0.409498	0.201193	-0.156226	-0.0094439	0.0632058	AT1G64065	hypothetical protein	-0.0314438	0.0578271	0.431401	0.607035	0.249657	0.0629884	-0.0849953	0.150938	AT1G69400	transducin family protein / WD-40 repeat family protein	0.351656	0.220133	0.169153	0.156906	0.185275	0.15015	0.269165	0.257685	AT1G63010	SPX (SYG1/Pho81/XPR1) domain-containing protein	-0.18585	-0.338869	-0.31032	-0.484644	-0.179816	-0.188356	-0.368864	-0.19745
AT1G64850	calcium-binding EF hand family protein	0.133865	0.136742	0.299723	0.476043	0.30581	0.112745	0.0321403	0.0120348	AT1G64170	ATCHX16 (CATION/H+ EXCHANGER 16); monovalent cation:proton antiporter	-0.247803	-0.394359	-0.174951	-0.0562599	0.0510666	0.0579387	-0.0963469	0.168926	AT1G69410	eukaryotic translation initiation factor 5A, putative / eIF-5A, putative	0.21567	0.527185	0.731649	0.862443	0.545398	0.408828	0.41427	0.513154	AT1G63180	UGE3 (UDP-D-GLUCOSE/UDP-D-GALACTOSE 4-EPIMERASE 3); UDP-glucose 4-epimerase/ protein dimerization	-0.0749321	-0.333066	-0.303165	-0.373191	-0.213898	-0.131829	-0.518964	-0.399399
AT1G64980	hypothetical protein	0.328697	0.7021	0.831758	0.964114	0.205782	-0.13593	-0.21332	-0.216498	AT1G64195	hypothetical protein	-0.784997	-0.923786	-0.141244	-0.430579	-0.534624	-0.116306	-0.245793	-0.792997	AT1G69480	EXS family protein / ERD1/XPR1/SYG1 family protein	1.19909	1.69436	2.29375	2.76838	1.55541	1.73749	1.82021	2.23095	AT1G63360	disease resistance protein (CC-NBS-LRR class), putative	-0.088584	-0.257333	-0.132223	-0.326783	-0.404802	-0.424939	-0.706288	-0.703648
AT1G65000	hypothetical protein	0.127701	0.145267	0.332538	0.214828	0.132292	0.23255	0.162437	0.0675203	AT1G64270	pseudo	0.00772681	-0.0323384	0.101244	0.329705	0.215131	0.0777971	0.140607	-0.0125785	AT1G69530	ATEXPA1 (ARABIDOPSIS THALIANA EXPANSIN A1)	1.61159	1.19898	1.62437	1.94948	0.401103	1.02605	1.35675	1.75058	AT1G63430	leucine-rich repeat transmembrane protein kinase, putative	-0.161842	-0.12351	-0.274599	-0.664768	-0.448505	-0.168774	-0.253863	-0.500012
AT1G65080	OXA1 family protein	0.0838779	0.183022	0.288533	0.390784	-0.0562499	0.0233857	0.125301	0.345057	AT1G64280	NPR1 (NONEXPRESSER OF PR GENES 1); protein binding	-0.155161	-0.248198	-0.318438	-0.513509	-0.306407	-0.0317169	-0.295923	-0.243461	AT1G69610	structural constituent of ribosome	0.508593	0.651832	1.01522	1.15904	0.123353	0.224967	0.160298	0.470291	AT1G63550	hypothetical protein	-1.3412	-1.26028	-2.37548	-2.04174	-1.91294	-2.99338	-3.41242	-2.7905
AT1G65290	MTACP2 (MITOCHONDRIAL ACYL CARRIER PROTEIN 2); acyl carrier	0.0678278	0.123847	0.134821	0.138579	-0.124584	-0.0391502	0.176812	-0.273624	AT1G64340	hypothetical protein	-1.98429	-2.14374	-1.1087	-2.1167	0.40386	-1.04649	-1.7582	-1.99823	AT1G69630	F-box family protein	0.00752387	0.0293052	0.0603141	0.192536	0.0391458	0.117947	0.0254614	0.0255796	AT1G63560	hypothetical protein	-2.59326	-2.38632	-2.91737	-3.52428	-2.13117	-1.85471	-2.59479	-2.27152
AT1G65295	hypothetical protein	0.372265	0.175321	0.302328	0.790768	0.13207	0.102885	-0.0729907	-0.264532	AT1G64360	hypothetical protein	-0.877254	-1.23912	-1.71136	-2.26838	0.918691	-0.0987642	-0.582024	-0.639721	AT1G69680	hypothetical protein	0.197911	0.188623	0.26666	0.513572	0.482879	0.362825	0.212865	0.530171	AT1G63580	protein kinase-related	-0.230619	-0.425628	-0.0597373	-0.175435	-0.417327	-0.415909	-0.804724	-0.57418
AT1G65347	pseudo	0.430998	0.628375	0.776032	1.05022	0.787471	0.149796	0.166815	0.0805287	AT1G64370	hypothetical protein	-0.281358	-0.321251	-0.322801	-0.413883	0.90685	0.76566	0.708727	0.741684	AT1G69690	TCP family transcription factor, putative	0.281813	0.439723	0.341518	0.412626	0.494348	0.270427	0.631155	0.57135	AT1G63690	protease-associated (PA) domain-containing protein	-0.0115337	-0.0598083	-0.173799	-0.404491	-0.107825	-0.0952103	-0.0601493	-0.315355
AT1G65440	GTB1 (GLOBAL TRANSCRIPTION FACTOR GROUP B1); RNA binding / hydrolase, acting on ester bonds / transcription elongation regulator	-0.54513	-0.175107	-0.343796	0.0210762	-0.64674	-0.58543	-0.120053	-0.394599	AT1G64400	long-chain-fatty-acid--CoA ligase, putative / long-chain acyl-CoA synthetase, putative	-0.322656	-0.323365	-0.0919576	-0.398155	-0.268556	0.0381578	-0.224336	0.166354	AT1G69790	protein kinase, putative	0.368324	0.682022	1.22652	1.32048	0.495344	0.562942	0.288986	0.880307	AT1G63700	YDA (YODA); kinase	-0.172354	-0.152835	-0.233311	-0.583404	-0.542364	-0.314554	-0.38755	-0.612184
AT1G65620	AS2 (ASYMMETRIC LEAVES 2)	0.526483	0.533483	0.722982	0.225491	-0.502527	-0.166206	-0.275492	-0.150391	AT1G64630	protein kinase family protein	-0.063198	-0.0543918	-0.194077	-0.330991	-0.0676273	0.0554858	-0.082965	0.0174986	AT1G69880	ATH8 (thioredoxin H-type 8); thiol-disulfide exchange intermediate	0.719454	1.09144	1.05419	1.30908	0.971214	0.257111	0.585346	0.420566	AT1G63840	zinc finger (C3HC4-type RING finger) family protein	-0.518624	-0.501128	-0.518329	-0.902844	-0.631624	-0.713394	-0.745917	-1.42375
AT1G65640	DEGP4 (DEGP PROTEASE 4); serine-type peptidase/ trypsin	0.459457	0.271759	0.763461	2.66127	2.57543	1.44394	1.80098	2.9748	AT1G64680	hypothetical protein	-0.119104	-0.205799	-0.190502	-0.368343	-0.0100669	-0.0837449	-0.273793	-0.393243	AT1G70250	receptor serine/threonine kinase, putative	0.267792	0.511304	0.733126	0.982481	0.311372	0.712445	0.452628	0.721757	AT1G63980	D111/G-patch domain-containing protein	-0.205614	-0.185182	-0.410823	-0.355299	-0.120845	-0.252146	-0.164665	-0.67679
AT1G65700	small nuclear ribonucleoprotein, putative / snRNP, putative / Sm protein, putative	0.290885	0.261607	0.465093	0.450751	-0.0306293	0.0292296	0.139848	0.0653935	AT1G64690	hypothetical protein	-0.258992	-0.423935	-0.427229	-0.757673	-0.0136247	0.0975576	0.0120985	0.0500299	AT1G70260	nodulin MtN21 family protein	1.7629	1.93253	2.79362	3.00632	0.559202	1.26019	1.07866	1.99031	AT1G64000	WRKY56 (WRKY DNA-binding protein 56); transcription factor	-0.324277	-0.304372	-0.184309	-0.515725	-0.38819	-0.181398	-0.475672	-0.290826
AT1G66090	disease resistance protein (TIR-NBS class), putative	0.503938	0.675026	1.01101	0.854879	-0.266831	0.596125	-0.216957	0.198649	AT1G64710	alcohol dehydrogenase, putative	-0.162993	-0.45094	-0.257657	-0.484731	-0.774966	-0.241446	-0.343424	0.0571886	AT1G70280	NHL repeat-containing protein	0.285488	0.398555	0.652381	1.14888	0.443207	0.17469	0.180067	0.37836	AT1G64140	hypothetical protein	-0.285889	-0.211821	-0.324327	-0.366616	-0.356441	-0.209855	-0.268669	-0.179801
AT1G66200	ATGSR2 (Arabidopsis thaliana glutamine synthase clone R2); glutamate-ammonia ligase	0.137818	0.221877	0.631423	1.16672	0.164027	0.0076249	-0.141144	0.0738685	AT1G64870	hypothetical protein	-0.278295	-0.311053	-0.289549	-0.28502	-0.258252	-0.307215	-0.338236	-0.231664	AT1G70440	SRO3 (SIMILAR TO RCD ONE 3); NAD+ ADP-ribosyltransferase	0.423799	0.766269	1.40867	1.85012	1.12311	0.932021	1.49121	1.10464	AT1G64430	hypothetical protein	0.00528683	-0.0689136	-0.1693	0.172047	0.289742	0.177739	0.0112582	0.331826
AT1G66350	RGL1 (RGA-LIKE 1); transcription factor	0.288541	0.438895	0.39956	0.168567	0.0542907	-0.0719288	-0.098083	0.0840706	AT1G64920	glycosyltransferase family protein	-0.147713	-0.248298	-0.915042	-0.897518	-0.121656	-0.0157019	0.0207516	-0.207987	AT1G70520	protein kinase family protein	0.221465	0.351887	0.568552	0.599498	0.381521	0.549578	0.506245	0.667893	AT1G64530	RWP-RK domain-containing protein	-0.201066	-0.31202	-0.540726	-0.610663	-0.537058	-0.465755	-0.521544	-0.492167
AT1G66450	DC1 domain-containing protein	0.14794	0.20342	0.165825	0.307958	-0.159032	-0.143832	-0.245752	0.0143	AT1G65150	meprin and TRAF homology domain-containing protein / MATH domain-containing protein	-0.0903407	-0.175152	-0.360354	-0.4302	0.314805	0.218498	0.145422	0.373946	AT1G70530	protein kinase family protein	0.138069	0.123466	0.371289	0.406115	0.265149	0.389464	0.33853	0.556551	AT1G64590	short-chain dehydrogenase/reductase (SDR) family protein	-1.14961	-1.28151	-1.21036	-1.92325	-0.757482	-0.67384	-1.26259	-1.43866
AT1G66500	zinc finger (C2H2-type) family protein	0.356722	0.573719	0.775874	1.29298	0.195978	0.165427	0.129819	0.430967	AT1G65190	protein kinase family protein	-0.109952	-0.498485	-0.614877	-0.689395	-0.16225	-0.0525355	-0.439456	-0.213758	AT1G70600	60S ribosomal protein L27A (RPL27aC)	0.22855	0.242537	0.21105	0.588944	0.129847	0.14727	0.337189	0.441845	AT1G64820	MATE efflux family protein	-1.69622	-1.74523	-2.13294	-2.19445	-1.9381	-1.73812	-1.80154	-2.18616
AT1G66660	seven in absentia (SINA) protein, putative	0.114057	0.230045	0.378509	0.118	-0.126478	-0.0637944	-0.124009	-0.063888	AT1G65220	eIF4-gamma/eIF5/eIF2-epsilon domain-containing protein	-0.0630735	-0.0856459	-0.159962	-0.211617	-0.0035415	0.137803	0.0230957	0.0978606	AT1G70640	octicosapeptide/Phox/Bem1p (PB1) domain-containing protein	2.15226	1.66267	2.48294	3.25502	3.11181	2.4269	2.43099	1.98476	AT1G64900	CYP89A2 (CYTOCHROME P450 89A2); oxygen binding	-0.505372	-0.730597	-0.333551	-0.292582	-0.578481	-0.400983	-0.432303	-0.104471
AT1G67050	hypothetical protein	0.514723	0.440702	0.564129	0.468289	0.273092	0.17041	0.125697	-0.195493	AT1G65260	PTAC4 (PLASTID TRANSCRIPTIONALLY ACTIVE4)	-0.0382756	-0.0628256	-0.232934	-0.514923	-0.165527	0.0319137	-0.0374154	-0.0413267	AT1G70650	zinc finger (Ran-binding) family protein	0.148778	0.187369	0.158506	0.122037	0.0968017	0.143635	0.248819	0.426659	AT1G64910	glycosyltransferase family protein	-1.03644	-1.04254	-1.78769	-1.23219	-0.821001	-1.1055	-1.13182	-1.07983
AT1G67190	F-box family protein	0.109748	0.194981	0.229566	0.218916	0.0854686	-0.000830562	0.00229938	-0.120913	AT1G65310	ATXTH17 (XYLOGLUCAN ENDOTRANSGLUCOSYLASE/HYDROLASE 17); hydrolase, acting on glycosyl bonds	-0.0993107	-0.482456	-0.319325	-0.251044	-0.199658	0.101639	-0.223715	-0.163452	AT1G70720	invertase/pectin methylesterase inhibitor family protein	2.39453	2.6176	3.10979	3.12644	3.28997	2.91387	2.59462	2.52022	AT1G65480	FT (FLOWERING LOCUS T)	-2.26228	-2.81657	-3.51236	-4.11397	-1.78677	-3.05878	-4.01346	-4.20138
AT1G67195	MIR414	0.320713	0.174098	0.4102	0.606219	0.31513	0.389638	0.12627	0.36881	AT1G65370	meprin and TRAF homology domain-containing protein / MATH domain-containing protein	-0.339407	-0.334653	-0.794997	-0.820678	0.26661	0.168969	0.783324	0.854065	AT1G70790	C2 domain-containing protein	-0.0471508	0.0239428	0.230756	0.214725	0.480127	0.194329	0.323789	-0.0848839	AT1G65590	ATHEX1/HEXO3 (BETA-HEXOSAMINIDASE 3); beta-N-acetylhexosaminidase/ hexosaminidase	-0.331147	-0.303166	-0.227525	-0.105379	0.100982	-0.505212	-0.279984	-1.09947
AT1G67250	proteasome maturation factor UMP1 family protein	0.217111	0.112776	0.231106	0.117869	-0.112616	-0.0543847	0.0871255	-0.186152	AT1G65580	FRA3 (FRAGILE FIBER3); inositol or phosphatidylinositol phosphatase	-0.0239876	-0.0871729	-0.176294	-0.29158	-0.166881	-0.0202046	-0.138263	-0.1133	AT1G70800	C2 domain-containing protein	0.364005	0.715757	1.0606	1.2316	0.653992	0.892578	1.03974	1.08048	AT1G65960	GAD2 (GLUTAMATE DECARBOXYLASE 2)	-0.140334	-0.284543	-0.36561	-0.330179	-0.126671	-0.174493	-0.436651	-0.264499
AT1G67370	ASY1 (ASYNAPTIC 1); DNA binding	0.225413	0.576235	0.875198	0.743877	0.637703	0.380455	0.631513	0.978354	AT1G65590	ATHEX1/HEXO3 (BETA-HEXOSAMINIDASE 3); beta-N-acetylhexosaminidase/ hexosaminidase	-0.331147	-0.303166	-0.227525	-0.105379	0.100982	-0.505212	-0.279984	-1.09947	AT1G70810	C2 domain-containing protein	0.335848	0.337626	0.57564	0.490702	0.415706	0.347132	0.115359	0.555192	AT1G65970	TPX2 (THIOREDOXIN-DEPENDENT PEROXIDASE 2); antioxidant	-1.38638	-1.19075	-1.37478	-0.996964	-0.227997	-0.958237	-0.969575	-0.853036
AT1G67570	hypothetical protein	-0.0700559	-0.0213051	-0.0691315	-0.0286937	-0.0428033	-0.135022	0.0188283	-0.235112	AT1G65660	SMP1 (swellmap 1); nucleic acid binding	-0.0267008	-0.0267789	-0.0629667	-0.0863795	0.163352	0.161885	0.100067	0.322183	AT1G70830	MLP28 (MLP-LIKE PROTEIN 28)	0.444097	0.396433	0.604589	0.532606	0.665471	0.753491	0.577399	1.1218	AT1G65985	hypothetical protein	-0.392224	-0.334513	-0.462907	-0.603024	-0.723207	-0.745371	-0.964292	-0.968062
AT1G67750	pectate lyase family protein	0.563658	0.573655	0.680221	0.507571	-0.0169889	0.359608	0.309083	0.387967	AT1G65720	hypothetical protein	-0.145762	-0.122728	-0.0980812	0.143734	0.0895522	-0.209224	-0.0715487	-0.0441867	AT1G70890	MLP43 (MLP-LIKE PROTEIN 43)	0.39623	0.105697	0.340259	0.238029	0.532622	0.755614	0.551802	0.70682	AT1G66330	senescence-associated family protein	-0.366392	-0.557163	-0.567241	-0.408038	-0.0614237	-0.512051	-0.699436	-0.279941
AT1G67790	hypothetical protein	0.468265	0.467207	0.283587	0.124042	-0.0153903	0.19818	0.343027	0.395837	AT1G66060	hypothetical protein	-0.877503	-1.68123	-2.19948	-2.68294	0.256622	-0.656022	-0.659171	-0.99435	AT1G70895	CLE17 (CLAVATA3/ESR-RELATED 17); receptor binding	0.319942	0.377978	0.432636	0.608009	0.408029	0.246439	0.473316	0.58191	AT1G66440	DC1 domain-containing protein	-0.189571	-0.148337	-0.1657	-0.322908	-0.264496	-0.498797	-0.656158	-0.450471
AT1G67930	Golgi transport complex protein-related	0.117431	0.207381	0.0397133	-0.395659	-0.663224	-0.0985222	-0.426151	0.012027	AT1G66190	hypothetical protein	-0.213017	-0.392693	-0.548743	-0.565893	0.18746	-0.177234	-0.124347	-0.232422	AT1G70900	hypothetical protein	0.23345	0.0548438	0.202568	0.251963	0.479547	0.512268	0.397795	0.452314	AT1G66520	PDE194 (PIGMENT DEFECTIVE 194); formyltetrahydrofolate deformylase/ hydroxymethyl-, formyl- and related transferase	-0.11077	-0.198094	-0.25826	-0.678112	-0.516208	-0.541716	-0.282073	-0.954846
AT1G67940	ATNAP3 (Arabidopsis thaliana non-intrinsic ABC protein 3)	0.275236	0.265291	0.504513	0.471976	-0.0511563	0.096301	0.0791464	0.342939	AT1G66270	beta-glucosidase (PSR3)	0.391245	-0.351767	0.998551	0.116495	0.463369	0.876904	1.01256	0.352817	AT1G71000	DNAJ heat shock N-terminal domain-containing protein	1.49901	0.228657	0.431438	0.503838	1.06588	1.76493	1.90262	2.38314	AT1G66540	cytochrome P450, putative	-1.06541	-1.06864	-1.02663	-1.12918	-0.749139	-1.68191	-1.64695	-1.81718
AT1G67950	RNA recognition motif (RRM)-containing protein	0.0678576	0.203324	0.214711	0.0836983	0.188968	-0.0945387	-0.126651	-0.120955	AT1G66280	glycosyl hydrolase family 1 protein	-0.754676	-1.2024	-1.29468	-0.555273	-0.0390855	0.453414	0.279038	0.470298	AT1G71080	hypothetical protein	0.112749	0.156536	0.251505	0.222135	0.147993	0.233728	0.292217	0.202953	AT1G66580	60S ribosomal protein L10 (RPL10C)	-0.251109	-0.153517	-0.25194	-0.276635	-0.383805	-0.306254	-0.0908899	-0.237173
AT1G68020	ATTPS6 (Arabidopsis thaliana trehalose phosphatase/synthase 6); transferase, transferring glycosyl groups / trehalose-phosphatase	0.191693	0.198159	0.215945	0.165658	0.0862395	0.308783	0.112867	0.0926736	AT1G66330	senescence-associated family protein	-0.366392	-0.557163	-0.567241	-0.408038	-0.0614237	-0.512051	-0.699436	-0.279941	AT1G71190	SAG18 (SENESCENCE ASSOCIATED GENE 18)	0.100507	0.0841333	0.213257	0.408731	0.277089	0.207648	0.134835	0.339248	AT1G66670	CLPP3 (Clp protease proteolytic subunit 3); endopeptidase Clp	-0.114466	-0.190396	-0.18131	-0.407925	-0.286117	-0.237084	-0.250173	-0.297613
AT1G68120	ATBPC3/BBR/BPC3/BPC3 (BASIC PENTACYSTEINE 3); DNA binding / transcription factor	0.292074	0.494886	0.58624	0.435995	-0.0693729	0.113452	0.43008	0.153885	AT1G66700	PXMT1; S-adenosylmethionine-dependent methyltransferase	-2.67949	-2.90331	-2.84898	-2.16704	-1.44737	0.169201	1.00747	2.27531	AT1G71691	GDSL-motif lipase/hydrolase family protein	1.53056	1.88906	2.25122	2.20154	1.00725	1.79969	2.04209	2.11734	AT1G66725	misc_RNA	-1.25385	-1.17549	-1.00896	-0.976884	-1.06768	-0.967273	-1.2054	-1.36961
AT1G68130	ATIDD14 (ARABIDOPSIS THALIANA INDETERMINATE(ID)-DOMAIN 14)	0.187826	0.376952	0.68259	0.683506	0.191099	0.114633	0.445243	-0.0772278	AT1G67110	CYP735A2 (cytochrome P450, family 735, subfamily A, polypeptide 2); oxygen binding	-0.656533	-0.541173	-0.520039	-0.246595	0.323332	1.13445	1.3182	2.11142	AT1G71750	phosphoribosyltransferase family protein	0.202464	0.0516458	0.105499	-0.0612633	0.0704347	0.112425	0.0705088	0.0270534	AT1G66890	hypothetical protein	-0.204613	-0.542075	-0.665847	-0.950666	-0.18911	-0.147671	-0.369358	-0.361523
AT1G68260	thioesterase family protein	0.268029	0.356763	0.538123	0.440082	-0.0794774	-0.105808	0.123487	-0.270299	AT1G67265	DVL3/RTFL21 (ROTUNDIFOLIA LIKE 21)	-0.334538	-0.990985	-0.085698	-0.149605	0.472045	0.613642	-0.0880628	-0.439905	AT1G71770	PAB5 (POLY(A)-BINDING PROTEIN); RNA binding	1.55292	2.17188	3.58296	3.61846	0.97602	1.1957	1.21778	1.63886	AT1G66930	serine/threonine protein kinase family protein	-0.614854	-0.758965	-1.45679	-1.76449	-1.15966	-1.98264	-2.65595	-3.0014
AT1G68290	ENDO 2 (ENDONUCLEASE 2); T/G mismatch-specific endonuclease/ endonuclease/ nucleic acid binding / single-stranded DNA specific endodeoxyribonuclease	2.83241	2.36151	5.1244	5.06588	0.264257	1.51892	1.99438	1.63613	AT1G67325	binding	-0.162671	-0.17407	-0.219383	-0.295358	-0.225537	-0.149263	-0.254228	-0.239775	AT1G71840	transducin family protein / WD-40 repeat family protein	0.154632	0.153326	0.239038	0.452105	0.161674	0.130174	0.353624	0.391441	AT1G66940	protein kinase-related	-0.312161	-0.318628	-0.409267	-0.341998	-0.745111	-1.15905	-0.894273	-1.00865
AT1G68480	JAG (JAGGED); nucleic acid binding / zinc ion binding	0.265929	0.87522	0.892122	0.715817	-0.579197	0.0416507	1.17658	-0.880296	AT1G67480	kelch repeat-containing F-box family protein	-0.179138	-0.238337	-0.377721	-0.281256	0.152209	0.0277966	0.0891158	0.275414	AT1G71865	hypothetical protein	0.51116	0.47408	0.535756	0.77214	0.648082	0.587111	0.664352	1.05278	AT1G67060	hypothetical protein	0.00229218	-0.115529	-0.11598	-0.16322	-0.0607722	-0.0682409	-0.25001	-0.131938
AT1G68520	zinc finger (B-box type) family protein	0.304019	0.377565	0.376247	0.327707	0.184966	0.19445	0.143197	0.264934	AT1G67580	protein kinase family protein	-0.247012	-0.258204	-0.395853	-0.598068	-0.354801	-0.0695888	-0.189918	-0.246789	AT1G71950	identical protein binding / subtilase	0.303091	0.328743	0.640566	0.40764	0.193796	0.242382	0.105853	0.0422379	AT1G67148	hypothetical protein	-0.323871	-0.429419	-0.313486	-0.278788	-0.527238	-0.4411	-0.794802	-0.785589
AT1G68530	CUT1 (CUTICULAR 1); acyltransferase/ catalytic	0.317526	0.085882	0.578867	0.529117	0.384633	0.555331	0.180575	0.457427	AT1G67650	7S RNA binding	-0.686048	-0.549674	-0.56339	-0.867829	-0.256148	-0.222417	-0.287138	-0.0144492	AT1G72060	serine-type endopeptidase inhibitor	0.219594	0.704886	1.5789	1.50218	0.504712	1.07141	0.930816	0.479562	AT1G67150	hypothetical protein	-1.20896	-1.19092	-1.8473	-1.82811	-1.51248	-1.65583	-2.02377	-1.74606
AT1G68585	hypothetical protein	0.5066	0.311139	0.447506	0.367064	0.312257	0.145442	0.10087	0.0135654	AT1G67860	hypothetical protein	-0.614378	-0.31441	-0.848149	-1.51837	-0.220316	-1.04145	-1.23639	-1.61737	AT1G72070	DNAJ heat shock N-terminal domain-containing protein	0.299862	0.56199	0.932857	0.780898	0.230239	0.900655	0.549155	0.591211	AT1G67230	LINC1 (LITTLE NUCLEI1)	-0.414669	-0.196225	-0.564961	-0.76179	-0.635756	-0.416467	-0.182128	-0.880357
AT1G68590	plastid-specific 30S ribosomal protein 3, putative / PSRP-3, putative	0.238225	0.155018	0.170371	0.087624	0.100243	0.134238	0.0383796	0.0722696	AT1G67865	hypothetical protein	-0.768426	-0.932094	-1.80472	-3.37357	-0.0517273	-1.21112	-1.73507	-2.01323	AT1G72090	radical SAM domain-containing protein / TRAM domain-containing protein	0.0579049	0.145268	0.174857	0.294117	0.144297	0.137351	0.204434	0.454056	AT1G67310	calmodulin binding / transcription regulator	-0.356863	-0.30034	-0.229884	-0.198512	-0.112027	-0.236736	-0.0561338	-0.499334
AT1G68660	hypothetical protein	0.0813877	0.123318	0.269447	0.219496	0.221925	0.0541864	0.0252292	-0.198585	AT1G67900	phototropic-responsive NPH3 family protein	-0.218489	-0.228767	-0.1772	-0.319358	0.0758274	0.266838	0.0326243	-0.0451514	AT1G72100	late embryogenesis abundant domain-containing protein / LEA domain-containing protein	1.61359	1.47439	1.77931	4.20741	1.2156	1.6748	3.6357	3.8602	AT1G67560	lipoxygenase family protein	-0.332692	-0.258223	-0.118685	-0.137256	-0.0719609	-0.348385	-0.296247	-0.659248
AT1G68680	hypothetical protein	0.377906	0.286122	0.422189	0.446982	0.0980629	0.255764	0.341224	0.580985	AT1G67970	AT-HSFA8 (Arabidopsis thaliana heat shock transcription factor A8); DNA binding / transcription factor	-0.271978	-0.339396	-0.283534	-0.286948	0.105492	-0.237926	-0.224517	-0.164166	AT1G72200	zinc finger (C3HC4-type RING finger) family protein	0.561831	0.425493	0.571202	0.432201	0.599882	0.810716	0.623254	0.802547	AT1G67710	ARR11 (RESPONSE REGULATOR 11); transcription factor/ two-component response regulator	-0.36201	-0.372071	-0.917574	-1.50373	-0.159635	-0.361011	-0.618607	-0.956845
AT1G68800	BRC2/TCP12 (BRANCHED2); transcription factor	1.27757	1.51137	1.77009	1.50822	0.465866	0.181354	-0.139658	-0.117062	AT1G68190	zinc finger (B-box type) family protein	-0.154737	-0.576311	-0.768343	-0.988555	-0.194523	-0.0622716	-0.251189	-0.465312	AT1G72520	lipoxygenase, putative	0.0454082	0.89206	1.77283	1.79491	0.112317	0.746558	0.347357	1.13237	AT1G67740	PSBY (photosystem II BY)	-0.159765	-0.0551859	-0.0796331	-0.0906689	-0.0205401	0.0391708	-0.0791694	-0.098853
AT1G68880	ATBZIP (ARABIDOPSIS THALIANA BASIC LEUCINE-ZIPPER 8); DNA binding / transcription factor	0.926371	0.822595	1.1972	1.41399	0.0190035	0.481614	0.446277	0.501018	AT1G68240	hypothetical protein	-0.650376	-0.391736	-0.155751	-0.861246	-0.575006	-0.479764	0.00655565	-0.881537	AT1G72690	hypothetical protein	0.412224	0.432563	0.634448	0.894459	0.538684	0.339965	0.133855	0.362227	AT1G67800	copine-related	-0.415256	-0.407607	-0.210853	-0.326253	-0.572394	-0.198418	-0.354903	-0.149208
AT1G68930	pentatricopeptide (PPR) repeat-containing protein	0.274842	0.30985	0.398613	0.351943	-0.0321377	0.175092	0.20538	0.464987	AT1G68440	hypothetical protein	-0.669667	-0.62865	-0.599897	-0.404722	0.0985515	-0.118425	-0.428681	-0.212254	AT1G72720	hypothetical protein	0.817937	0.948332	1.48542	1.53902	1.13851	0.800678	0.977941	1.22399	AT1G67810	Fe-S metabolism associated domain-containing protein	-1.73327	-2.11201	-2.10976	-1.67918	-0.81046	-0.910047	-0.924072	-0.587032
AT1G69030	hypothetical protein	0.124184	0.255841	0.398884	0.400666	-0.0381236	0.0242146	0.0513728	-0.0354203	AT1G68620	hydrolase	-1.20483	-1.4663	-0.519139	-0.743367	-0.766842	0.041457	-0.381925	-0.0024539	AT1G73040	jacalin lectin family protein	0.80343	1.43583	1.9644	2.03073	1.62839	1.22103	1.41638	1.32425	AT1G67860	hypothetical protein	-0.614378	-0.31441	-0.848149	-1.51837	-0.220316	-1.04145	-1.23639	-1.61737
AT1G69210	hypothetical protein	0.179447	0.316907	0.502119	0.692144	0.105577	0.146743	0.368814	0.472725	AT1G68810	basic helix-loop-helix (bHLH) family protein	-0.481644	-0.382621	-0.812277	-1.29583	0.0849128	-0.574807	-0.312714	-1.04654	AT1G73240	hypothetical protein	0.160992	0.0294955	0.100203	0.0799902	-0.127802	0.0102423	0.0316506	0.0455984	AT1G67865	hypothetical protein	-0.768426	-0.932094	-1.80472	-3.37357	-0.0517273	-1.21112	-1.73507	-2.01323
AT1G69550	disease resistance protein (TIR-NBS class), putative	0.265505	0.232372	0.376703	0.266079	0.189255	0.0808698	-0.0848447	-0.0970944	AT1G68830	STN7 (STT7 HOMOLOG STN7); kinase/ protein kinase	-0.206426	-0.275026	-0.156778	-0.0770114	-0.0876133	-0.383693	-0.356307	-0.149818	AT1G73320	hypothetical protein	0.445906	0.304042	0.219206	0.275583	0.199603	0.354892	0.50501	0.537388	AT1G67980	CCoAMT (caffeoyl-CoA 3-O-methyltransferase); caffeoyl-CoA O-methyltransferase	-1.75024	-1.5606	-1.64257	-1.58278	-2.08627	-1.73183	-2.03571	-2.31372
AT1G69700	ATHVA22C (Arabidopsis thaliana HVA22 homologue C)	0.254656	0.25865	0.276721	0.392525	0.287241	-0.0469132	0.127628	-0.014928	AT1G68945	hypothetical protein	0.329789	0.237063	-0.228581	-0.257439	0.262467	0.732506	0.346808	0.276994	AT1G73325	trypsin and protease inhibitor family protein / Kunitz family protein	2.78786	2.9916	5.64549	5.27302	3.88501	4.10676	4.44762	4.69092	AT1G68050	FKF1 (FLAVIN-BINDING KELCH DOMAIN F BOX PROTEIN); ubiquitin-protein ligase	-0.51296	-0.477116	-0.554165	-0.647701	-0.499133	-0.857142	-0.770283	-0.806797
AT1G70020	hypothetical protein	0.322521	0.575805	0.838393	0.555276	0.296404	0.0987412	0.350752	-0.588852	AT1G68990	DNA-directed RNA polymerase, mitochondrial (RPOMT)	-0.249282	-0.231506	-0.377692	-0.45238	-0.490644	-0.228961	-0.0449368	-0.105998	AT1G73380	hypothetical protein	0.260131	0.25042	0.347309	0.367845	0.120215	0.0855389	0.0594099	0.346959	AT1G68370	ARG1 (ALTERED RESPONSE TO GRAVITY 1)	-0.101483	-0.0527454	-0.180206	-0.149369	-0.157498	-0.32764	-0.189376	-0.124598
AT1G70280	NHL repeat-containing protein	0.285488	0.398555	0.652381	1.14888	0.443207	0.17469	0.180067	0.37836	AT1G69150	DC1 domain-containing protein	-1.3889	-1.49853	-1.76781	-1.04619	-0.413884	-0.519165	-0.804302	-0.608889	AT1G73480	hydrolase, alpha/beta fold family protein	1.93611	1.67413	2.08038	1.91172	1.21232	1.68094	1.39182	1.66424	AT1G68420	asparaginyl-tRNA synthetase-related	-0.0702052	-0.0909797	-0.109617	-0.119902	-0.131692	-0.137039	-0.128416	-0.0920807
AT1G70350	hypothetical protein	0.207349	0.210937	0.295923	0.413606	0.106504	0.042607	0.25653	0.15746	AT1G69523	UbiE/COQ5 methyltransferase family protein	-0.171445	-0.40874	-0.647872	-0.996291	0.201663	-0.0437772	-0.150015	-0.329221	AT1G73550	lipid binding	0.307114	1.73064	2.38052	2.58282	1.15905	0.305252	1.3869	0.845976	AT1G68450	VQ motif-containing protein	-0.611947	-0.437583	-0.333023	-0.402696	-0.667439	-0.671981	-0.971394	-0.411575
AT1G70370	BURP domain-containing protein / polygalacturonase, putative	0.335691	0.588181	0.530812	0.447491	0.0778046	-0.00835277	0.112062	0.096059	AT1G69545	leucine-rich repeat family protein	-0.179977	-0.128203	-0.395557	-0.709398	-0.249064	0.0763294	0.0598484	0.0984522	AT1G73640	AtRABA6a (Arabidopsis Rab GTPase homolog A6a); GTP binding	0.27928	0.359544	0.354572	0.0616089	0.461094	0.349977	0.412483	0.27475	AT1G68825	DVL5/RTFL15 (ROTUNDIFOLIA LIKE 15)	-0.334098	-0.451986	-1.16909	-1.54527	-0.36886	-0.285241	-0.20603	-1.00477
AT1G70410	carbonic anhydrase, putative / carbonate dehydratase, putative	0.180477	0.203179	0.244061	0.107136	-0.117173	0.0623701	-0.0584245	-0.268475	AT1G69720	HO3 (HEME OXYGENASE 3)	-0.923037	-0.731036	-1.23489	-2.26021	-0.248445	1.37484	0.957776	1.03815	AT1G73680	pathogen-responsive alpha-dioxygenase, putative	0.233351	0.299336	0.672957	0.730202	0.917826	1.28243	1.29151	1.61492	AT1G68862	hypothetical protein	-0.509609	-0.427215	-0.722725	-1.08413	-0.536482	-0.530294	-0.398244	-0.59837
AT1G70430	protein kinase family protein	0.470743	0.464851	0.375911	0.22877	-0.0638604	0.0257778	0.0266989	-0.0107714	AT1G69730	protein kinase family protein	-0.321809	-0.467798	-0.620472	-1.07715	-0.214356	0.353315	-0.209127	0.183782	AT1G74130	rhomboid family protein	1.38127	0.972134	0.227315	1.21932	1.12314	0.852223	1.16994	1.15517	AT1G68940	armadillo/beta-catenin repeat protein-related / U-box domain-containing protein	-0.277574	-0.476021	-0.474627	-0.7325	-0.283926	-0.223972	-0.648564	-0.224707
AT1G70490	ATARFA1D; GTP binding / phospholipase activator/ protein binding	0.419018	0.290591	0.284837	0.359756	0.135276	0.0951282	0.160144	0.201251	AT1G69920	ATGSTU12 (Arabidopsis thaliana Glutathione S-transferase (class tau) 12); glutathione transferase	-2.15505	-1.78132	-1.23635	-0.452003	-1.78978	-0.672851	0.405663	0.850116	AT1G74240	mitochondrial substrate carrier family protein	0.253866	0.234741	0.247312	0.36442	0.255449	0.307211	0.343766	0.645653	AT1G69050	hypothetical protein	-0.456974	-0.494789	-0.718793	-0.904137	-0.547968	-0.299787	-0.233455	-0.683252
AT1G70510	KNAT2 (KNOTTED-LIKE FROM ARABIDOPSIS THALIANA 2); transcription factor	0.162411	0.143813	0.563936	0.748336	0.280154	0.163654	0.046709	0.577629	AT1G69950	pseudo	-0.0642656	-0.0886929	-0.187623	-0.391728	-0.185217	-0.146934	-0.152817	-0.0730679	AT1G74430	MYB95 (myb domain protein 95); DNA binding / transcription factor	0.430219	0.670575	1.41175	1.18199	0.295147	0.478688	0.31556	0.509911	AT1G69120	AP1 (APETALA1); DNA binding / transcription factor	-2.47828	-2.45809	-3.15475	-3.75112	-1.49094	-2.97035	-3.17454	-3.63251
AT1G70600	60S ribosomal protein L27A (RPL27aC)	0.22855	0.242537	0.21105	0.588944	0.129847	0.14727	0.337189	0.441845	AT1G70000	DNA-binding family protein	-0.34656	-0.324898	-0.169277	-0.0902494	0.014889	-0.0349412	0.0618156	0.091101	AT1G74520	ATHVA22A (Arabidopsis thaliana HVA22 homologue A)	0.249448	0.272442	0.484965	0.511553	0.453922	0.315211	0.268406	0.203363	AT1G69160	hypothetical protein	-0.141014	-0.22949	-0.501891	-0.880745	-0.138821	-0.449279	-0.179818	-0.819024
AT1G70610	ATTAP1 (Arabidopsis thaliana transporter associated with antigen processing protein 1); ATPase, coupled to transmembrane movement of substances	0.348927	0.27488	0.309921	0.246429	-0.114899	-0.199924	-0.396736	-0.275451	AT1G70180	sterile alpha motif (SAM) domain-containing protein	-0.303467	-0.115781	-0.256958	-0.434217	-0.201183	-0.292786	-0.00134709	-0.649357	AT1G74630	pentatricopeptide (PPR) repeat-containing protein	0.294539	0.345988	0.466603	0.635547	0.361561	0.312539	0.218909	0.674639	AT1G69170	squamosa promoter-binding protein-like 6 (SPL6)	-0.220758	-0.348906	-0.54491	-0.68274	-0.27038	-0.357211	-0.397271	-0.514936
AT1G70840	MLP31 (MLP-LIKE PROTEIN 31)	1.34939	0.463562	1.93787	0.797531	0.253854	0.891169	4.19142	0.308569	AT1G70220	hypothetical protein	-0.131407	-0.41021	-0.77119	-1.23945	0.146819	-0.0341444	0.0885826	0.363634	AT1G74670	gibberellin-responsive protein, putative	1.48632	1.3651	1.26929	1.33602	0.678555	0.832101	0.913312	0.7796	AT1G69220	SIK1 (ERINE/THREONINE KINASE 1); kinase	-0.124996	-0.143683	-0.190004	-0.340999	-0.250064	-0.138283	-0.144089	-0.201953
AT1G71300	Vps52/Sac2 family protein	0.289846	0.182778	0.158865	2.14345	2.10088	1.46381	1.09932	2.4321	AT1G70230	hypothetical protein	-0.174548	-0.269354	-0.403638	-0.224698	0.170783	0.0883058	0.0944458	0.231431	AT1G74700	NUZ	0.129857	0.0596573	0.175126	-0.00198413	-0.178253	0.0340031	0.142573	0.157444	AT1G69240	hydrolase, alpha/beta fold family protein	-0.179499	-0.478415	-0.96295	-1.47466	-0.542064	-0.24701	-0.742208	-1.17008
AT1G71310	hypothetical protein	0.202328	-0.104127	0.294107	0.246349	-0.0889186	-0.0048198	-0.0434117	0.307114	AT1G70620	cyclin-related	-0.0395548	-0.122763	-0.600071	-0.183045	0.303384	0.208384	0.204013	0.56062	AT1G75060	hypothetical protein	0.418037	0.403006	0.313088	0.212176	0.500909	0.413596	0.410216	0.567729	AT1G69450	hypothetical protein	-0.189291	-0.365613	-0.149906	-0.372154	-0.236989	-0.167597	-0.526111	-0.246801
AT1G71380	ATCEL3/ATGH9B3 (ARABIDOPSIS THALIANA GLYCOSYL HYDROLASE 9B3); hydrolase, hydrolyzing O-glycosyl compounds	0.457348	0.343182	0.387771	0.109787	0.0462595	0.374248	0.686431	0.753873	AT1G70670	caleosin-related family protein	-0.0937185	-0.133371	-0.17531	-0.261297	0.0602272	0.0675939	-0.146089	-0.138935	AT1G75090	methyladenine glycosylase family protein	0.376825	0.234548	0.104897	0.0619052	0.167029	0.244058	0.308058	0.515071	AT1G69520	methyltransferase-related	-0.412351	-0.450502	-0.490684	-0.306896	-0.467116	-0.542857	-0.575141	-0.460683
AT1G71390	disease resistance family protein / LRR family protein	0.650282	0.600795	0.671153	0.434501	0.197465	1.60016	0.640186	0.979551	AT1G70690	kinase-related	-0.212823	-0.261986	-0.143224	-0.090331	0.457146	0.176857	-0.126737	-0.300919	AT1G75770	hypothetical protein	0.260867	0.16489	0.254135	0.464802	0.359273	0.301269	0.229002	0.221903	AT1G69570	Dof-type zinc finger domain-containing protein	-0.106308	-0.332621	-0.4624	-0.768911	-1.02549	-0.97774	-1.38718	-1.37059
AT1G71420	pentatricopeptide (PPR) repeat-containing protein	0.181743	0.228548	0.166964	0.539434	0.0754957	0.37528	0.321665	0.616979	AT1G70760	inorganic carbon transport protein-related	-0.0854578	-0.248988	-0.19525	-0.674651	0.135984	0.00951232	-0.101084	-0.45138	AT1G75840	ATGP3/ATROP4 (RHO-LIKE GTP BINDING PROTEIN 4); GTP binding / GTPase	0.137143	0.245431	0.13399	0.182184	0.554384	0.323998	0.319024	0.574058	AT1G69587	misc_RNA	-0.149321	-0.114523	-0.218413	-0.289394	-0.153012	-0.313212	-0.270472	-0.49691
AT1G71697	ATCK1 (CHOLINE KINASE)	0.0934994	0.26257	0.519521	0.481478	-0.0581365	0.0766689	-0.187732	-0.150685	AT1G70850	MLP34 (MLP-LIKE PROTEIN 34)	-0.323782	-1.26462	-0.235245	-0.106533	0.129364	0.867061	0.319367	0.492787	AT1G75900	family II extracellular lipase 3 (EXL3)	0.969703	0.540324	1.24145	1.84115	1.22569	1.39031	1.14508	1.67489	AT1G69640	acid phosphatase, putative	-0.057969	-0.178577	-0.16591	-0.1769	-0.330098	-0.230807	-0.33328	-0.260351
AT1G71710	inositol polyphosphate 5-phosphatase, putative	0.436449	0.454483	0.607639	0.607453	0.246892	0.139727	-0.00155565	0.215072	AT1G70920	homeobox-leucine zipper protein, putative / HD-ZIP transcription factor, putative	-0.642116	-0.713189	-0.953156	-1.09429	0.102986	-0.187489	-0.244317	-0.365992	AT1G75990	26S proteasome regulatory subunit S3, putative (RPN3)	0.146888	0.199707	0.180497	0.253497	0.0620233	0.102954	0.212117	0.262845	AT1G69810	WRKY36 (WRKY DNA-binding protein 36); transcription factor	-0.460855	-0.45167	-0.586012	-0.891081	-0.792225	-0.524817	-0.784519	-0.808242
AT1G71730	hypothetical protein	0.092918	0.0237881	0.261406	0.327964	-0.0876464	-0.0816582	0.109942	-0.00813767	AT1G70990	proline-rich family protein	-0.373492	-0.553232	-0.987314	-1.06827	0.0498364	0.129999	-0.245117	-0.458305	AT1G76040	CPK29 (calcium-dependent protein kinase 29); calmodulin-dependent protein kinase/ kinase	0.216515	0.799654	1.09351	0.940272	0.331396	0.681933	0.593563	0.59642	AT1G69890	hypothetical protein	-0.531098	-0.513582	-0.374668	-0.232322	-0.141572	-0.574399	-0.782563	-0.78981
AT1G71780	hypothetical protein	0.222669	0.122032	0.0819874	0.153376	0.0449824	0.290488	0.298827	0.467073	AT1G71090	auxin efflux carrier family protein	0.0836302	-0.0856391	-0.058802	-0.282024	1.8573e-05	0.0977524	-0.143906	0.0187725	AT1G76060	EMB1793 (EMBRYO DEFECTIVE 1793); catalytic	0.100683	0.0868466	0.184637	0.16706	0.170766	0.137202	0.138366	0.198858	AT1G69940	ATPPME1; pectinesterase	-0.340587	-0.389594	-0.352682	-0.35289	-0.332948	-0.4368	-0.409398	-0.295531
AT1G71900	hypothetical protein	0.0953405	0.157557	0.381612	0.425811	0.0951748	-0.152483	-0.0599452	-0.329581	AT1G71240	hypothetical protein	0.872285	0.704022	1.182	0.367203	0.629297	0.700502	0.13352	0.433648	AT1G76150	maoC-like dehydratase domain-containing protein	0.0496674	0.0540183	0.16551	0.396189	0.425183	0.278629	0.220925	0.466661	AT1G70170	MMP (MATRIX METALLOPROTEINASE); metalloendopeptidase	-0.764456	-0.646459	-0.457788	-0.486588	-0.590371	-0.791224	-0.790275	-1.67872
AT1G71950	identical protein binding / subtilase	0.303091	0.328743	0.640566	0.40764	0.193796	0.242382	0.105853	0.0422379	AT1G71530	protein kinase family protein	-0.199965	-0.540831	-1.00857	-1.43055	-0.460466	0.0568356	-0.471697	-0.257588	AT1G76260	transducin family protein / WD-40 repeat family protein	0.318403	0.301392	0.444548	0.526296	0.161039	0.30539	0.338911	0.539409	AT1G70270	hypothetical protein	-1.09806	-1.33182	-1.47738	-1.23254	-0.343633	-1.43823	-0.611126	-0.467032
AT1G72020	hypothetical protein	0.100406	0.194684	0.385375	0.286534	-0.104218	-0.174664	0.194771	-0.45498	AT1G71692	AGL12 (AGAMOUS-LIKE 12); transcription factor	-0.258028	-0.148002	-0.268374	-0.33556	0.334048	0.0193982	-0.0663982	-0.00857799	AT1G76440	hypothetical protein	0.290492	0.331101	0.400055	0.316142	0.284281	0.338706	0.337485	0.523662	AT1G70330	ENT1,AT (EQUILIBRATIVE NUCLEOTIDE TRANSPORTER 1); nucleoside transmembrane transporter	-0.0997494	-0.228233	-0.24289	-0.449734	-0.23754	-0.137306	-0.422321	-0.339424
AT1G72170	hypothetical protein	0.20926	0.168995	0.167034	0.19174	0.143512	0.0886058	0.213702	0.129106	AT1G71810	ABC1 family protein	-0.083286	-0.175225	-0.374804	-0.552304	0.0237786	0.0473828	0.121904	-0.15259	AT1G76560	CP12-3	0.333032	0.265639	0.309445	0.194442	0.454495	0.469137	0.244548	0.403443	AT1G70420	hypothetical protein	-0.118573	-0.397769	-0.340918	-0.529513	-0.401371	-0.587041	-0.655087	-1.01126
AT1G72210	basic helix-loop-helix (bHLH) family protein (bHLH096)	0.17791	0.24679	0.234609	0.170537	-0.238825	-0.014078	0.232629	0.119232	AT1G71850	hypothetical protein	-0.178639	-0.0744564	-0.217992	-0.23931	-0.23831	-0.182155	0.131935	0.127709	AT1G76790	O-methyltransferase family 2 protein	0.381538	0.277287	1.19904	1.28656	0.531031	0.930335	0.731617	1.16575	AT1G70820	phosphoglucomutase, putative / glucose phosphomutase, putative	-0.253352	-0.438811	-0.578604	-0.738414	-0.160586	-0.326086	-0.456646	-0.30024
AT1G72280	AERO1 (ARABIDOPSIS ENDOPLASMIC RETICULUM OXIDOREDUCTINS 1); FAD binding / electron carrier/ oxidoreductase, acting on sulfur group of donors, disulfide as acceptor / protein binding	0.214128	0.122639	0.435863	0.353435	-0.380809	0.245224	0.150583	0.477845	AT1G71980	protease-associated zinc finger (C3HC4-type RING finger) family protein	-0.23203	-0.341154	-0.45399	-0.669459	-0.203069	-0.072116	-0.183396	-0.248029	AT1G76860	small nuclear ribonucleoprotein, putative / snRNP, putative / Sm protein, putative	0.134484	0.132556	0.191685	0.136597	0.055997	0.0482543	0.123426	-0.0430421	AT1G70985	hydroxyproline-rich glycoprotein family protein	-1.51429	-1.30064	-1.83716	-2.1713	-0.356992	-0.989601	-0.740239	-1.02441
AT1G72610	GLP1 (GERMIN-LIKE PROTEIN 1); manganese ion binding / metal ion binding / nutrient reservoir	0.232009	0.226376	0.375989	0.447753	-0.169026	-0.459864	-0.212417	-0.926484	AT1G72120	transporter	-0.444705	-0.578852	-0.166573	-0.274734	0.0280452	0.0306577	-0.258013	-0.0798037	AT1G76930	ATEXT4 (EXTENSIN 4)	0.536533	0.535165	0.291253	0.24938	0.305953	0.472606	0.204012	0.351607	AT1G71030	ATMYBL2 (Arabidopsis myb-like 2); DNA binding / transcription factor	-0.577032	-1.33251	-1.0443	-0.880965	-1.74497	-2.08915	-2.39538	-2.70147
AT1G72620	hydrolase, alpha/beta fold family protein	0.567592	0.686513	1.10957	1.28877	0.412948	-0.865921	-0.632798	-0.62174	AT1G72130	proton-dependent oligopeptide transport (POT) family protein	-0.323218	-0.694947	-0.770576	-0.668435	-0.0971939	0.0456365	-0.122834	0.209046	AT1G76940	RNA recognition motif (RRM)-containing protein	0.166153	0.150542	0.13705	0.185621	0.148285	0.219738	0.19081	0.287906	AT1G71410	protein kinase family protein	-0.0809042	-0.174865	-0.385942	-0.679974	-0.286915	-0.116822	-0.277423	-0.299322
AT1G72690	hypothetical protein	0.412224	0.432563	0.634448	0.894459	0.538684	0.339965	0.133855	0.362227	AT1G72150	PATL1 (PATELLIN 1); transporter	-0.219129	-0.289438	-0.399704	-0.586444	-0.032477	-0.0657802	-0.4181	-0.419145	AT1G76960	hypothetical protein	0.940684	1.39666	1.36107	1.16087	1.57251	1.20919	1.59999	1.37742	AT1G71820	hypothetical protein	-0.186027	-0.227257	-0.392411	-0.601372	-0.37013	-0.363485	-0.365573	-0.588444
AT1G72970	HTH (HOTHEAD); aldehyde-lyase	0.452084	0.667499	0.57333	0.0441204	0.107543	0.0806469	-0.0774323	0.0146977	AT1G72180	leucine-rich repeat transmembrane protein kinase, putative	-0.420302	-0.125352	-0.224519	-0.401399	-0.105895	-0.151213	-0.1119	-0.0587199	AT1G77080	MAF1 (MADS AFFECTING FLOWERING 1); transcription factor	0.554967	0.142567	0.117462	0.255156	0.393479	0.648422	0.55099	0.549567	AT1G72150	PATL1 (PATELLIN 1); transporter	-0.219129	-0.289438	-0.399704	-0.586444	-0.032477	-0.0657802	-0.4181	-0.419145
AT1G73177	BNS (BONSAI)	0.19012	0.341181	0.59137	0.848014	0.246078	-0.0308252	0.33504	-0.156593	AT1G72360	ethylene-responsive element-binding protein, putative	-0.861496	-0.903253	-0.990508	-1.06805	-0.891828	-1.23958	-1.28468	-1.07953	AT1G77450	ANAC032 (Arabidopsis NAC domain containing protein 32); transcription factor	0.700803	0.480954	1.13933	1.69736	0.678277	1.04568	1.05616	1.46536	AT1G72360	ethylene-responsive element-binding protein, putative	-0.861496	-0.903253	-0.990508	-1.06805	-0.891828	-1.23958	-1.28468	-1.07953
AT1G73480	hydrolase, alpha/beta fold family protein	1.93611	1.67413	2.08038	1.91172	1.21232	1.68094	1.39182	1.66424	AT1G72416	heat shock protein binding	-0.969553	-0.243727	-0.318462	0.137544	1.52736	-0.555933	0.663971	-0.368303	AT1G77480	nucellin protein, putative	0.157787	0.14222	0.16205	0.180754	0.0700262	0.208488	0.199	0.400045	AT1G72390	hypothetical protein	-0.101942	-0.134546	-0.248885	-0.389549	-0.232239	-0.111423	-0.258198	-0.144642
AT1G73530	RNA recognition motif (RRM)-containing protein	0.206078	0.239106	0.261365	0.219036	0.027986	-0.0521649	-0.0321328	-0.212995	AT1G72510	hypothetical protein	-0.0801482	-0.462479	-0.647904	-0.833894	0.14261	0.170813	-0.0400242	0.0874496	AT1G77540	hypothetical protein	0.200672	0.221632	0.501711	0.753558	0.446252	0.196883	0.277395	0.41957	AT1G72500	inter-alpha-trypsin inhibitor heavy chain-related	-0.302813	-0.283438	-0.217575	-0.709463	-0.702858	-0.617072	-0.782442	-0.831225
AT1G73630	calcium-binding protein, putative	0.250836	0.401519	0.68334	0.934484	0.0360853	-0.422683	-0.237029	-0.555445	AT1G72540	protein kinase, putative	-0.437498	-0.63971	-1.0058	-1.45376	0.0728863	0.100833	-0.285996	-0.581951	AT1G77710	hypothetical protein	0.127143	0.193431	0.402224	0.582063	0.376173	0.147511	0.229667	0.180256	AT1G72510	hypothetical protein	-0.0801482	-0.462479	-0.647904	-0.833894	0.14261	0.170813	-0.0400242	0.0874496
AT1G73740	glycosyl transferase family 28 protein	0.247149	0.227779	0.474894	0.405475	-0.0874289	0.119764	-0.093097	0.0635173	AT1G72820	mitochondrial substrate carrier family protein	-0.124792	-0.297885	-0.412033	-0.314904	0.128438	0.0720259	0.0328984	0.0131386	AT1G77920	bZIP family transcription factor	0.261382	0.295817	0.53585	0.67193	0.173351	0.293027	0.290623	0.445118	AT1G72560	PSD (PAUSED); tRNA binding	-0.0915635	-0.156639	-0.400245	-0.553568	-0.276611	-0.207643	-0.197338	-0.132761
AT1G73760	zinc finger (C3HC4-type RING finger) family protein	0.113759	-0.000682665	0.180619	-0.0475322	-0.329136	-0.384825	-0.377803	-0.428608	AT1G72890	disease resistance protein (TIR-NBS class), putative	-0.182639	-0.620591	-0.860762	-0.700307	-0.139385	-0.20482	-0.521055	-0.229816	AT1G78000	SULTR1;2 (SULFATE TRANSPORTER 1;2); sulfate transmembrane transporter	0.954805	1.18536	1.50515	1.66589	0.99095	1.19636	1.00437	1.42996	AT1G72830	HAP2C (Heme activator protein (yeast) homolog 2C); transcription factor	-0.527237	-0.547887	-0.320094	-0.589315	-0.727162	-0.74133	-0.823107	-0.925577
AT1G73770	hypothetical protein	0.106672	0.0783126	0.228031	0.41014	0.0532624	-0.0629041	0.0594464	0.0596438	AT1G72990	BGAL17 (BETA-GALACTOSIDASE 17); beta-galactosidase	-0.0590005	-0.165618	-0.363523	-0.485452	-0.0559465	-0.0151589	-0.0136312	0.104625	AT1G78060	glycosyl hydrolase family 3 protein	0.265929	0.36667	0.447465	0.520046	0.492692	0.386356	0.50793	0.821166	AT1G72880	acid phosphatase survival protein SurE, putative	0.0615536	-0.0927057	-0.187996	-0.575213	-0.111567	-0.114707	-0.404604	-0.331388
AT1G73805	calmodulin binding	0.658506	0.955762	0.860976	0.268885	0.0314103	1.56177	0.550378	0.942246	AT1G73000	hypothetical protein	-0.482238	-0.892049	-1.82374	-1.75275	-0.275561	-0.719146	-1.8472	-1.25249	AT1G78070	WD-40 repeat family protein	1.53756	1.36015	2.11667	2.5824	0.812847	1.16791	1.04178	1.55912	AT1G72890	disease resistance protein (TIR-NBS class), putative	-0.182639	-0.620591	-0.860762	-0.700307	-0.139385	-0.20482	-0.521055	-0.229816
AT1G73810	hypothetical protein	0.527163	0.297254	0.569621	0.999684	-0.127949	0.90112	0.433561	1.2053	AT1G73066	protein binding	-0.706219	-0.695655	-0.873965	-0.330022	-0.40879	-0.412355	0.200884	-0.0872591	AT1G78080	RAP2 (related to AP2 4); DNA binding / transcription factor	-0.455036	-0.0237867	0.0975921	1.2231	-0.488507	-0.316967	-0.121075	-0.785464	AT1G73160	glycosyl transferase family 1 protein	-0.235396	-0.200083	-1.18628	-1.07534	-0.0960602	-0.144503	-0.0140769	-0.361628
AT1G73870	zinc finger (B-box type) family protein	0.970474	0.331757	0.872049	0.849418	-0.181622	-0.312517	-0.599018	0.0270484	AT1G73100	SUVH3 (SU(VAR)3-9 HOMOLOG 3)	-0.0744443	-0.143217	-0.413546	-0.408129	0.0378572	0.083548	0.190966	0.346035	AT1G78172	hypothetical protein	0.669675	0.627992	0.626639	0.295932	0.169065	0.417024	0.450454	0.350164	AT1G73260	trypsin and protease inhibitor family protein / Kunitz family protein	-1.0732	-1.24894	-1.7305	-1.24828	-0.30038	-1.21616	-1.74969	-1.68327
AT1G74000	SS3 (STRICTOSIDINE SYNTHASE 3)	0.524572	0.331139	0.538191	0.517069	0.41211	-0.0205752	-0.223164	0.314012	AT1G73160	glycosyl transferase family 1 protein	-0.235396	-0.200083	-1.18628	-1.07534	-0.0960602	-0.144503	-0.0140769	-0.361628	AT1G78200	protein phosphatase 2C, putative / PP2C, putative	0.251558	0.237369	0.421447	0.195665	-0.0324836	0.115206	-0.0422686	-0.0900456	AT1G73270	SCPL6 (serine carboxypeptidase-like 6); serine carboxypeptidase	-0.169203	-0.332396	-0.205532	-0.246179	-0.33245	-0.745135	-1.04563	-0.918774
AT1G74010	strictosidine synthase family protein	0.66656	0.847593	1.14753	1.1675	0.176248	0.16003	0.0143537	0.478835	AT1G73300	SCPL2 (serine carboxypeptidase-like 2); serine carboxypeptidase	-0.167558	-0.561727	-0.437243	-0.34586	-0.0921199	0.240429	-0.421456	0.0428147	AT1G78210	hydrolase, alpha/beta fold family protein	0.272615	0.304079	0.733911	0.95734	0.409295	0.296406	0.301654	0.536556	AT1G73280	SCPL3 (serine carboxypeptidase-like 3); serine carboxypeptidase	-0.745025	-1.1422	-1.16441	-0.976202	-0.320237	-0.225096	-0.979228	-0.374526
AT1G74030	enolase, putative	0.314414	0.425877	0.300728	0.184639	-0.27894	0.171007	0.23164	0.356083	AT1G73310	SCPL4 (serine carboxypeptidase-like 4); serine carboxypeptidase	-0.128698	-0.314539	-0.321433	-0.225993	-0.00765668	-0.46919	-0.776096	-0.566886	AT1G78360	ATGSTU21 (Arabidopsis thaliana Glutathione S-transferase (class tau) 21); glutathione transferase	1.07578	1.03572	0.993693	0.947311	0.561475	0.724029	0.228709	0.83644	AT1G73600	phosphoethanolamine N-methyltransferase	-0.37237	-0.236693	-0.364905	-0.408901	-0.716423	-1.29335	-1.4671	-1.19744
AT1G74230	GR-RBP5 (glycine-rich RNA-binding protein 5); RNA binding	0.046328	0.184199	0.22676	0.0976052	-0.172554	-0.00293709	0.10678	-0.025816	AT1G73330	ATDR4 (Arabidopsis thaliana drought-repressed 4)	-0.988443	-1.30521	-0.923045	-1.35297	-0.0651923	-0.347005	-0.893887	-1.103	AT1G78370	ATGSTU20 (Arabidopsis thaliana Glutathione S-transferase (class tau) 20); glutathione transferase	0.598266	1.28482	1.83885	2.09754	0.998764	0.812569	1.48055	1.25722	AT1G73850	structural constituent of ribosome	-0.34017	-0.375935	-0.480504	-0.342401	-0.122804	-0.214888	-0.298392	-0.168245
AT1G74250	DNAJ heat shock N-terminal domain-containing protein	0.16043	0.148473	0.174945	0.161699	-0.166089	-0.0879615	-0.0220343	-0.0628094	AT1G73340	oxygen binding	-0.229756	-0.661223	-0.86028	-0.851034	-0.678424	0.142352	-0.212296	0.0244031	AT1G78380	ATGSTU19 (GLUTATHIONE TRANSFERASE 8); glutathione transferase	0.211186	0.143085	0.331706	0.294053	0.0128202	0.233265	0.204037	0.456563	AT1G73930	hypothetical protein	-0.470215	-0.109111	-0.35975	-0.905512	-0.429983	-0.661478	-0.260105	-1.38415
AT1G74390	exonuclease family protein	0.180204	0.15918	0.173537	0.168128	0.0304161	0.11623	0.161369	0.380851	AT1G73400	pentatricopeptide (PPR) repeat-containing protein	-0.111154	-0.220313	-0.193595	-0.3188	-0.000790307	-0.0204451	-0.160621	-0.0446356	AT1G78490	CYP708A3 (cytochrome P450, family 708, subfamily A, polypeptide 3); oxygen binding	0.379765	0.509493	0.985247	0.743518	0.321877	0.247865	0.162629	0.450157	AT1G74080	MYB122 (myb domain protein 122); DNA binding / transcription factor	-1.17085	-1.1967	-1.10106	-1.24559	-1.11868	-0.834605	-0.915678	-0.486486
AT1G74420	FUT3 (fucosyltransferase 3); fucosyltransferase/ transferase, transferring glycosyl groups	0.45745	0.667022	1.36788	1.21391	0.029449	0.327806	0.495664	0.753974	AT1G73470	hypothetical protein	-0.192268	-0.270519	-0.454924	-0.691107	0.1476	-0.0279432	-0.181446	-0.281709	AT1G78610	mechanosensitive ion channel domain-containing protein / MS ion channel domain-containing protein	0.167754	0.189625	0.137929	0.234933	0.279272	0.401011	0.467108	0.661259	AT1G74150	hypothetical protein	-0.201229	-0.156511	-0.605619	-1.09115	-0.525243	-0.578209	-0.305554	-0.586664
AT1G74670	gibberellin-responsive protein, putative	1.48632	1.3651	1.26929	1.33602	0.678555	0.832101	0.913312	0.7796	AT1G73500	ATMKK9 (Arabidopsis thaliana MAP kinase kinase 9); kinase	-0.176283	-0.250891	-0.144718	-0.208183	0.156629	-0.0352641	0.00791728	-0.0825269	AT1G78620	integral membrane family protein	0.192759	0.204677	0.31965	0.323974	0.309634	0.175862	0.133231	0.139009	AT1G74260	catalytic	0.401598	-0.121018	-0.137715	-1.06852	-1.75165	-0.569968	0.388496	-1.43689
AT1G74710	ICS1 (ISOCHORISMATE SYNTHASEI); isochorismate synthase	0.175567	0.152716	0.212703	0.466698	0.193089	0.536508	0.0308184	0.75637	AT1G73660	protein kinase family protein	-0.0990855	-0.179749	-0.242784	-0.673366	-0.274034	0.14024	-0.181797	-0.181506	AT1G78800	glycosyl transferase family 1 protein	0.130663	0.143465	0.129364	0.35494	0.268097	0.18292	0.241348	0.419392	AT1G74500	bHLH family protein	-0.965143	-0.569013	-1.01588	-1.01143	-0.334612	-1.04866	-0.0910418	-1.99769
AT1G74730	hypothetical protein	0.425084	0.428527	0.484867	0.577399	0.0387267	0.0901423	0.0908046	-0.173987	AT1G73710	pentatricopeptide (PPR) repeat-containing protein	-0.160059	-0.284739	-0.399845	-0.562706	-0.0847353	-0.0636158	-0.0921578	-0.0862723	AT1G78810	hypothetical protein	0.222072	0.223883	0.172016	0.086742	0.0224933	0.106027	0.0841029	0.363286	AT1G74840	myb family transcription factor	-0.0991907	-0.227768	-0.218215	-0.514015	0.090497	-0.093632	-0.198982	-0.358813
AT1G74890	ARR15 (RESPONSE REGULATOR 15); transcription regulator	0.485434	0.650335	1.28857	1.38276	-0.735071	0.888777	1.0883	0.98925	AT1G73830	BEE3 (BR ENHANCED EXPRESSION 3); DNA binding / transcription factor	-0.524767	-0.286271	-0.31477	-0.356525	0.755526	0.740374	0.818779	1.10857	AT1G78820	curculin-like (mannose-binding) lectin family protein / PAN domain-containing protein	0.00608315	-0.10232	0.156797	0.10395	0.00685879	-0.0852075	-0.587153	-0.0984885	AT1G75160	hypothetical protein	-0.883358	-0.888034	-0.745603	-0.99564	-0.613178	-0.823641	-0.93195	-2.12747
AT1G74950	JAZ2/TIFY10B (JASMONATE-ZIM-DOMAIN PROTEIN 2)	0.0591504	0.112089	0.719373	0.687695	0.146982	0.149726	-0.020458	0.106449	AT1G73980	phosphoribulokinase/uridine kinase family protein	-0.138941	-0.124639	-0.172964	-0.266546	-0.0199801	0.0617368	-0.0329467	0.04734	AT1G78890	hypothetical protein	0.178804	0.101589	0.255306	0.371018	0.499803	0.345678	0.262375	0.399064	AT1G75220	integral membrane protein, putative	-0.219963	-0.206368	-0.111046	-0.0952944	-0.271268	-0.281042	-0.547271	-0.57704
AT1G75120	RRA1 (REDUCED RESIDUAL ARABINOSE 1)	0.980889	0.956541	0.724378	0.619602	-0.311891	0.692114	1.02705	0.841274	AT1G74055	hypothetical protein	-0.323828	-0.432641	-0.401583	-0.608596	0.091747	-0.0636968	-0.0674999	-0.207561	AT1G79160	hypothetical protein	0.468462	0.377797	0.43505	0.610384	0.0275632	0.266908	0.147245	0.453221	AT1G75250	myb family transcription factor	-0.537601	-1.2689	-2.22043	-2.77366	-0.955602	-1.2053	-1.76214	-2.11603
AT1G75200	flavodoxin family protein / radical SAM domain-containing protein	0.134268	0.180361	0.100174	0.0275534	-0.28034	-0.146315	0.180992	-0.0277745	AT1G74170	protein binding	-0.172151	-0.184699	-0.536784	-0.626542	-0.37044	-0.0945932	0.0149235	-0.150071	AT1G79200	hypothetical protein	0.237324	0.23764	0.285915	0.425043	0.278932	0.197541	0.295265	0.310993	AT1G75390	ATBZIP44 (ARABIDOPSIS THALIANA BASIC LEUCINE-ZIPPER 44); DNA binding / protein heterodimerization/ transcription factor	-0.659022	-0.369718	-0.41271	-0.12406	-0.0750577	-0.661857	-0.449611	-0.755623
AT1G75330	OTC (ORNITHINE CARBAMOYLTRANSFERASE); amino acid binding / carboxyl- or carbamoyltransferase	-0.0389714	0.154245	0.237679	0.318517	-0.237458	-0.153235	0.010974	0.111785	AT1G74200	leucine-rich repeat family protein	-0.346499	-0.205613	-0.498859	-0.232937	-0.0498246	-0.107671	0.0317205	0.161377	AT1G79210	20S proteasome alpha subunit B, putative	0.239134	0.18602	0.17753	0.160172	0.115403	0.136051	0.105979	0.172695	AT1G75550	glycine-rich protein	-0.405794	-0.446682	-0.864136	-0.641224	-0.480397	-0.825801	-0.699109	-1.45302
AT1G75360	hypothetical protein	0.401627	0.200145	0.447192	0.164465	-0.101552	-0.132795	-0.0246885	0.0101323	AT1G74458	hypothetical protein	-0.126719	-0.218276	-0.219837	-0.290027	0.752098	1.03746	0.89253	0.863582	AT1G79230	ST1 (MERCAPTOPYRUVATE SULFURTRANSFERASE 1)	0.194561	0.232562	0.241766	0.363938	0.220365	0.273987	0.16844	0.327069	AT1G75660	XRN3 (5'-3' exoribonuclease 3); 5'-3' exoribonuclease	-0.372622	-0.259579	-0.301456	-0.233429	-0.587673	-0.600541	-0.425474	-0.633198
AT1G75430	transcription factor	-0.534573	0.411509	-0.267902	0.467997	-0.528076	0.135722	0.547857	0.473414	AT1G74680	exostosin family protein	-0.0554137	-0.245173	-0.275826	-0.275286	0.312737	0.120881	0.0418499	0.374576	AT1G79260	hypothetical protein	0.485328	0.463777	0.332995	1.65973	1.438	0.9606	0.885935	1.72127	AT1G75750	GASA1 (GAST1 PROTEIN HOMOLOG 1)	-0.635667	-1.04883	-1.16893	-1.02962	-0.752156	-0.969075	-1.21792	-1.53768
AT1G75510	transcription initiation factor IIF beta subunit (TFIIF-beta) family protein	0.0887942	0.108029	0.0841419	0.132505	0.0354723	0.136419	0.181147	0.308577	AT1G74750	pentatricopeptide (PPR) repeat-containing protein	-0.136422	-0.0754899	-0.0834433	-0.23496	-0.339454	-0.363734	-0.0845815	-0.307035	AT1G79360	ATOCT2 (ARABIDOPSIS THALIANA ORGANIC CATION/CARNITINE TRANSPORTER2); carbohydrate transmembrane transporter/ sugar:hydrogen ion symporter	0.838026	1.42911	1.40594	1.24274	2.05036	1.60819	2.21109	1.57875	AT1G75960	AMP-binding protein, putative	-0.461572	-0.505493	-0.468203	-0.326649	-0.261351	-1.03089	-0.9236	-0.623814
AT1G75590	auxin-responsive family protein	0.247603	0.509907	0.717314	0.668928	0.0258061	-0.371107	-0.107944	-1.11201	AT1G74770	protein binding / zinc ion binding	-0.276083	-0.322393	-0.566932	-0.680199	0.0556222	-0.558121	-0.841548	-0.435955	AT1G79450	LEM3 (ligand-effect modulator 3) family protein / CDC50 family protein	0.157684	0.168192	0.30718	0.690651	0.164733	0.364593	0.267504	0.726999	AT1G76080	ATCDSP32/CDSP32 (CHLOROPLASTIC DROUGHT-INDUCED STRESS PROTEIN OF 32 KD); thiol-disulfide exchange intermediate	-0.231356	-0.425148	-0.52516	-0.666996	-0.187796	-0.321004	-0.363042	-0.473253
AT1G75980	hypothetical protein	0.219094	0.14375	0.143063	0.153088	0.0381221	0.0826333	0.152609	0.0259532	AT1G74840	myb family transcription factor	-0.0991907	-0.227768	-0.218215	-0.514015	0.090497	-0.093632	-0.198982	-0.358813	AT1G79460	GA2 (GA REQUIRING 2); ent-kaurene synthase	0.489856	0.499621	0.461179	0.724324	0.486783	0.498391	0.694703	0.933489	AT1G76090	SMT3 (S-adenosyl-methionine-sterol-C-methyltransferase 3); S-adenosylmethionine-dependent methyltransferase	-0.5969	-0.264626	-0.434839	-0.428636	-0.206269	-0.539673	-0.245099	-0.804924
AT1G76260	transducin family protein / WD-40 repeat family protein	0.318403	0.301392	0.444548	0.526296	0.161039	0.30539	0.338911	0.539409	AT1G74880	NDH-O (NAD(P)H:PLASTOQUINONE DEHYDROGENASE COMPLEX SUBUNIT O)	-0.266689	-0.40796	-0.520693	-0.636453	0.312965	0.254905	0.217086	0.222464	AT1G79520	cation efflux family protein	0.323062	0.377417	0.826078	0.986171	0.869061	1.11798	0.94936	1.44086	AT1G76250	hypothetical protein	-0.382659	-0.528384	-0.844956	-1.15398	-0.218559	-0.162564	-0.513664	-0.260845
AT1G76300	SMD3 (SNRNP CORE PROTEIN SMD3)	0.203516	0.252736	0.345652	0.338859	-0.0139875	0.139575	0.40715	0.336634	AT1G74900	OTP43 (ORGANELLE TRANSCRIPT PROCESSING DEFECT 43)	-0.0972346	-0.184453	-0.191057	-0.132533	-0.154052	-0.126123	-0.0785207	0.0953542	AT1G79610	sodium proton exchanger, putative (NHX6)	0.23208	0.426137	0.684521	0.789098	0.435358	0.304559	0.443195	0.37802	AT1G76350	RWP-RK domain-containing protein	-0.481902	-0.420388	-0.513495	-0.737378	-0.500013	-0.358612	-0.377052	-0.462843
AT1G76420	CUC3 (CUP SHAPED COTYLEDON3); transcription factor	0.127227	0.111914	0.502465	0.467235	-0.125263	0.290527	0.248383	0.646539	AT1G75030	ATLP-3 (Arabidopsis thaumatin-like protein 3)	-0.106419	-0.608267	-0.503395	-1.18164	-0.214276	0.168708	-0.270473	-0.174534	AT1G79820	SGB1; carbohydrate transmembrane transporter/ sugar:hydrogen ion symporter	0.482651	0.567241	0.633924	0.724231	0.177695	0.264936	0.387161	0.331286	AT1G76460	RNA recognition motif (RRM)-containing protein	-0.372478	-0.472567	-0.526519	-0.842347	-0.358907	-0.415381	-0.570018	-0.748448
AT1G76870	hypothetical protein	0.265715	0.182435	0.261597	0.121994	0.027291	0.0821251	0.115532	0.198149	AT1G75040	PR5 (PATHOGENESIS-RELATED GENE 5)	-0.82395	-1.2177	-1.42499	-1.84688	-1.08389	1.5584	1.77977	2.62296	AT1G80110	ATPP2-B11; carbohydrate binding	0.434392	0.416481	0.755406	0.560802	0.106392	0.576152	0.452484	0.602838	AT1G76520	auxin efflux carrier family protein	-0.929754	-1.36028	-1.28403	-0.556113	-0.394711	-0.94583	-0.89244	-0.526003
AT1G77030	glycine-rich protein	0.120481	0.2478	0.310357	0.641699	0.136533	-0.0255433	0.224861	0.766894	AT1G75170	SEC14 cytosolic factor family protein / phosphoglyceride transfer family protein	-0.250925	-0.349057	-0.246199	-0.267776	-0.339775	-0.0785529	-0.355416	-0.0928336	AT1G80130	binding	3.05042	3.57268	6.37191	8.00775	4.02356	4.52915	5.47543	6.1502	AT1G76680	OPR1 (12-oxophytodienoate reductase 1); 12-oxophytodienoate reductase	-1.33244	-1.33221	-0.880838	-0.628876	-1.17488	-1.24905	-1.22518	-0.847695
AT1G77145	hypothetical protein	0.44556	0.765266	1.03245	0.778456	0.319676	0.043836	0.362665	-0.327864	AT1G75295	miscRNA	-0.061273	-0.238161	-0.466908	-0.506937	-0.184569	-0.0334817	0.0594747	-0.128024	AT1G80310	sulfate transmembrane transporter	0.193579	0.116238	0.338717	0.234571	0.416362	0.417701	0.192504	0.510394	AT1G76850	SEC5A (EXOCYST COMPLEX COMPONENT SEC5)	0.0186583	-0.0539323	-0.169579	-0.37562	-0.229193	-0.107641	-0.0528877	-0.271453
AT1G77150	hypothetical protein	0.073353	0.242908	0.379046	0.199728	-0.209012	-0.134751	0.0551531	-0.0606263	AT1G75400	protein binding / zinc ion binding	-0.067637	-0.116833	-0.110517	-0.0892361	-0.232422	-0.106956	-0.0696855	-0.00792193	AT1G80450	VQ motif-containing protein	0.610127	0.610608	0.739616	0.957219	0.621952	0.589532	0.723543	0.83901	AT1G76990	ACR3 (ACT Domain Repeat 3)	-0.582771	-0.682983	-0.839855	-0.811043	-0.517997	-0.646513	-0.519285	-0.453191
AT1G77160	hypothetical protein	1.67242	2.20914	2.9563	2.45107	1.1691	0.917923	1.50398	0.84489	AT1G75450	CKX5 (CYTOKININ OXIDASE 5); cytokinin dehydrogenase	-0.495239	-0.932591	-0.74916	-0.562386	-0.75813	0.00620577	-0.256866	-0.10603	AT1G80520	hypothetical protein	0.578978	0.569158	0.65814	0.534696	0.18154	0.503442	0.609291	0.657207	AT1G77210	sugar transporter, putative	-0.374326	-0.990033	-1.28829	-1.3813	-0.299251	-0.31565	-0.790731	-0.455889
AT1G77350	hypothetical protein	0.0911124	0.122113	0.288557	0.518944	0.225879	0.0138233	0.217688	0.0734038	AT1G75800	pathogenesis-related thaumatin family protein	-0.117131	-0.171461	-0.154014	-0.427538	-0.0631983	-0.0938721	-0.232186	-0.371499	AT1G80530	nodulin family protein	0.0739609	0.345595	0.614047	0.882269	0.190614	0.098914	0.403942	0.625562	AT1G77240	AMP-binding protein, putative	-0.201066	-0.609097	-0.557809	-1.10518	-0.326111	-0.432504	-0.761218	-0.598752
AT1G77390	CYCA1;2 (CYCLIN A1;2); cyclin-dependent protein kinase regulator	0.359145	1.07003	1.16644	0.667963	-0.0975987	-0.0310411	0.0965746	-0.040307	AT1G75820	CLV1 (CLAVATA 1); ATP binding / kinase/ protein serine/threonine kinase	-0.350507	-0.275852	-0.681594	-0.762648	0.0835496	-0.0927835	-0.173348	-0.179654	AT1G80555	3-isopropylmalate dehydrogenase/ oxidoreductase, acting on the CH-OH group of donors, NAD or NADP as acceptor	0.713988	0.550628	0.796916	0.791067	0.33673	0.574478	0.471984	0.500198	AT1G77270	hypothetical protein	-0.298535	-0.236773	-0.761783	-1.32071	-0.0891079	-0.608172	-0.330249	-1.01105
AT1G77405	hypothetical protein	0.156966	0.279575	0.38237	0.350698	-0.111468	0.172239	0.249266	0.36026	AT1G75920	family II extracellular lipase 5 (EXL5)	-0.450283	-0.375282	-0.498788	-0.630049	0.524254	-0.0265023	0.011438	-0.854963	AT1G80570	F-box family protein (FBL14)	0.445191	0.307737	0.428579	0.757005	0.562609	0.702415	0.649758	1.0816	AT1G77630	peptidoglycan-binding LysM domain-containing protein	-0.237816	-0.103856	-0.284325	-0.630048	-0.396704	-0.413837	-0.354838	-0.628293
AT1G77510	ATPDIL1-2 (PDI-LIKE 1-2); protein disulfide isomerase	0.175924	0.243583	0.351346	0.211889	-0.219627	0.0580342	0.311507	0.324028	AT1G76080	ATCDSP32/CDSP32 (CHLOROPLASTIC DROUGHT-INDUCED STRESS PROTEIN OF 32 KD); thiol-disulfide exchange intermediate	-0.231356	-0.425148	-0.52516	-0.666996	-0.187796	-0.321004	-0.363042	-0.473253	AT1G80650	RTL1 (RNASE THREE-LIKE PROTEIN 1); double-stranded RNA binding	0.270765	0.215337	0.346474	0.4956	0.35344	0.313805	0.299171	0.268009	AT1G77660	MORN (Membrane Occupation and Recognition Nexus) repeat-containing protein /phosphatidylinositol-4-phosphate 5-kinase-related	-1.00516	-0.862836	-1.05205	-0.632915	-0.82908	-1.06002	-0.560091	-1.64193
AT1G77750	30S ribosomal protein S13, chloroplast, putative	0.204136	0.166136	0.215319	0.0818338	-0.121637	0.00914733	0.043775	-0.0680464	AT1G76210	hypothetical protein	-0.918265	-2.79777	-1.1027	-1.41407	-0.564197	0.394027	-0.388495	-1.41177	AT1G80700	hypothetical protein	0.155794	0.184274	0.19224	0.407609	0.281488	0.178479	0.334098	0.191523	AT1G77746	hypothetical protein	-0.0231546	-0.0165127	-0.0252617	-0.0341107	-0.0411146	-0.0264555	-0.0461069	-0.0363903
AT1G77990	AST56 (sulphate transporter 2;2); sulfate transmembrane transporter	0.295028	0.232308	0.393817	0.768681	0.50602	0.361259	-0.00301485	0.722794	AT1G76220	hypothetical protein	-0.200586	-0.811933	-1.12753	-1.05899	0.015508	0.194177	-0.412282	0.0813342	AT1G80830	NRAMP1 (NRAMP metal ion transporter 1); manganese ion transmembrane transporter/ metal ion transmembrane transporter	0.271081	0.386165	0.46775	0.708782	0.15915	0.353064	0.515328	0.941274	AT1G78120	tetratricopeptide repeat (TPR)-containing protein	-0.572054	-0.436693	-0.830281	-1.31791	-0.313542	-0.563248	-0.386112	-0.6527
AT1G78040	pollen Ole e 1 allergen and extensin family protein	0.196219	0.167067	0.264798	0.260058	0.14636	0.00486788	-0.0435338	-0.0824933	AT1G76350	RWP-RK domain-containing protein	-0.481902	-0.420388	-0.513495	-0.737378	-0.500013	-0.358612	-0.377052	-0.462843	AT1G80865	hypothetical protein	1.65949	2.6758	2.8516	2.55607	1.75607	1.4114	2.35046	1.87018	AT1G78260	RNA recognition motif (RRM)-containing protein	-0.199766	-0.157582	-0.546262	-1.09959	-0.508819	-0.286372	-0.472795	-0.662619
AT1G78050	phosphoglycerate/bisphosphoglycerate mutase family protein	0.294472	0.658602	0.807416	0.776914	-0.206982	0.106044	0.0322782	0.119145	AT1G76410	ATL8; protein binding / zinc ion binding	-0.12063	-0.354703	-0.307979	-0.295929	0.314768	0.583069	0.624754	0.494763	AT1G80890	hypothetical protein	0.127551	0.151081	0.41956	0.36048	0.0481953	0.0647265	0.0947662	0.13758	AT1G78270	ATUGT85A4 (UDP-GLUCOSYL TRANSFERASE 85A4); UDP-glycosyltransferase/ glucuronosyltransferase/ transferase, transferring hexosyl groups	-0.550263	-0.884064	-1.3358	-1.40002	-0.0565901	-0.700409	-0.545859	-0.582248
AT1G78080	RAP2 (related to AP2 4); DNA binding / transcription factor	-0.455036	-0.0237867	0.0975921	1.2231	-0.488507	-0.316967	-0.121075	-0.785464	AT1G76500	DNA-binding family protein	-0.589295	-0.383946	-0.643007	-0.6665	-0.599126	-0.309015	-0.066403	-0.249089	AT2G01300	hypothetical protein	0.00289773	0.726607	1.4503	1.26909	0.462694	0.135568	-0.131258	-0.446669	AT1G78300	GRF2 (GENERAL REGULATORY FACTOR 2); protein phosphorylated amino acid binding	-0.0747344	-0.203643	-0.334778	-0.719468	-0.57969	-0.328105	-0.501334	-0.519885
AT1G78170	hypothetical protein	0.720261	0.450774	0.403199	0.03865	-0.407383	0.136796	-0.193284	-0.169582	AT1G76550	pyrophosphate--fructose-6-phosphate 1-phosphotransferase alpha subunit, putative / pyrophosphate-dependent 6-phosphofructose-1-kinase, putative	-0.174033	-0.111852	-0.181334	-0.542048	-0.295434	-0.0864649	-0.0903906	-0.289528	AT2G01350	QPT (QUINOLINATE PHOSHORIBOSYLTRANSFERASE); nicotinate-nucleotide diphosphorylase (carboxylating)	0.116293	0.239855	0.50582	0.753218	0.166059	0.109771	0.18473	0.35417	AT1G78450	SOUL heme-binding family protein	-0.818472	-1.57006	-2.55733	-3.32799	-1.03785	-0.794214	-1.37378	-1.35481
AT1G78172	hypothetical protein	0.669675	0.627992	0.626639	0.295932	0.169065	0.417024	0.450454	0.350164	AT1G76720	translation initiation factor	-0.23982	-0.218969	-0.450075	-0.308607	-0.159278	-0.13526	0.0130879	-0.151698	AT2G01390	pentatricopeptide (PPR) repeat-containing protein	0.300187	0.317087	0.281522	0.220757	0.257278	0.168623	0.173776	0.390843	AT1G78460	SOUL heme-binding family protein	-0.574918	-1.42828	-1.98505	-2.60709	-0.896664	-0.407048	-0.910778	-0.796572
AT1G78200	protein phosphatase 2C, putative / PP2C, putative	0.251558	0.237369	0.421447	0.195665	-0.0324836	0.115206	-0.0422686	-0.0900456	AT1G76825	translation initiation factor	-0.2728	-0.520126	-0.763082	-0.502603	0.313214	0.115806	0.0803537	0.143516	AT2G01580	hypothetical protein	0.377382	0.276791	0.526378	0.130678	0.847662	0.667314	0.309828	0.412382	AT1G78510	SPS1 (SOLANESYL DIPHOSPHATE SYNTHASE 1)	-0.0111215	-0.24329	-0.0647779	-0.0189278	-0.0595002	-0.010272	-0.245943	0.0996432
AT1G78230	protein binding	0.953498	0.716556	0.783848	0.39188	-0.63714	-0.19431	-0.638632	-0.302585	AT1G76900	AtTLP1 (TUBBY LIKE PROTEIN 1); phosphoric diester hydrolase/ transcription factor	-0.178655	-0.0905801	-0.176622	-0.0816929	-0.0188442	0.00696812	0.125324	0.133794	AT2G01590	hypothetical protein	0.778682	0.745434	0.864079	0.848894	0.512013	0.657457	0.536899	0.67375	AT1G78520	glycosyl hydrolase family protein 17	-1.17598	-1.23784	-1.67099	-2.06762	-0.394733	-0.699814	-0.31571	-1.28547
AT1G78340	ATGSTU22 (Arabidopsis thaliana Glutathione S-transferase (class tau) 22); glutathione transferase	0.445478	0.539829	1.12191	1.45742	-0.01716	1.08192	1.01406	1.48833	AT1G77131	pseudo	-0.581939	-0.401065	-0.788607	-0.441466	-0.159568	-0.0100381	0.111576	-0.172452	AT2G01610	invertase/pectin methylesterase inhibitor family protein	1.70786	1.89454	2.00489	1.7859	0.937038	1.12698	1.64846	1.55932	AT1G78570	RHM1/ROL1 (RHAMNOSE BIOSYNTHESIS1); UDP-L-rhamnose synthase/ UDP-glucose 4,6-dehydratase/ catalytic	-0.426668	-0.269251	-0.244118	-0.493852	-0.349541	-0.185632	-0.233493	-0.240657
AT1G78380	ATGSTU19 (GLUTATHIONE TRANSFERASE 8); glutathione transferase	0.211186	0.143085	0.331706	0.294053	0.0128202	0.233265	0.204037	0.456563	AT1G77230	tetratricopeptide repeat (TPR)-containing protein	-0.123136	-0.408882	-0.4392	-0.562873	0.645562	0.572246	0.682461	0.709116	AT2G01620	MEE11 (maternal effect embryo arrest 11)	0.329892	0.153924	0.391311	0.54062	0.649574	0.488811	0.429994	0.517252	AT1G78600	zinc finger (B-box type) family protein	-0.654841	-0.680956	-0.70551	-0.992798	-0.935639	-1.05589	-0.976513	-1.30246
AT1G78500	pentacyclic triterpene synthase, putative	0.595398	0.2144	0.205936	1.12681	0.043157	0.532451	-0.257748	0.710893	AT1G77300	EFS (EARLY FLOWERING IN SHORT DAYS)	-0.128475	-0.0739091	-0.431511	-0.553441	-0.163093	0.0424271	-0.0533787	0.0404402	AT2G01960	TET14 (TETRASPANIN14)	0.346797	0.468625	1.52339	1.31645	0.18181	1.27392	0.787004	0.479226	AT1G78880	balbiani ring 1-related / BR1-related	-0.679143	-0.164603	-0.237096	-0.683614	-0.799583	-1.06185	-0.438985	-1.72674
AT1G78550	oxidoreductase, 2OG-Fe(II) oxygenase family protein	0.0890344	0.0985263	0.137235	0.262134	0.27327	0.105328	0.0835926	0.24489	AT1G77490	TAPX; L-ascorbate peroxidase	-0.0469513	-0.336963	-0.820039	-1.42762	-0.124821	0.206662	-0.153743	0.193929	AT2G01990	hypothetical protein	0.780852	0.655494	0.534255	0.624437	0.553852	0.625788	0.631311	0.853759	AT1G78915	binding	-0.21532	-0.324678	-0.456405	-0.894859	-0.258352	-0.253886	-0.338217	-0.483788
AT1G78900	VHA-A; ATP binding / hydrogen ion transporting ATP synthase, rotational mechanism	0.165761	0.119006	0.099122	0.174902	0.148719	0.176719	0.0359203	0.291392	AT1G77530	O-methyltransferase family 2 protein	-1.52477	-2.02707	-1.27773	-0.656215	-0.754061	-0.127089	-0.689321	-0.940543	AT2G02120	LCR70/PDF2 (Low-molecular-weight cysteine-rich 70); protease inhibitor	1.01816	1.31533	1.19504	1.82094	1.67517	1.92655	2.47577	2.76243	AT1G78930	mitochondrial transcription termination factor-related / mTERF-related	-0.243652	-0.294246	-0.501405	-0.654492	-0.403564	-0.369763	-0.178684	-0.107857
AT1G79010	NADH-ubiquinone oxidoreductase 23 kDa subunit, mitochondrial (TYKY)	0.166204	0.114105	0.289389	0.636278	0.21269	0.0973368	-0.137109	0.14444	AT1G77630	peptidoglycan-binding LysM domain-containing protein	-0.237816	-0.103856	-0.284325	-0.630048	-0.396704	-0.413837	-0.354838	-0.628293	AT2G02250	ATPP2-B2 (Phloem protein 2-B2); carbohydrate binding	0.99929	0.913831	1.02885	0.820239	0.182576	1.1215	0.718877	1.10905	AT1G79060	hypothetical protein	-0.385812	-0.300792	-0.577908	-0.497381	-0.595506	-0.487997	-0.301326	-0.672513
AT1G79075	miscRNA	-0.00682484	0.0231492	0.893134	1.84754	0.0369131	-0.0359331	0.171121	0.0390258	AT1G77810	galactosyltransferase family protein	-0.0546044	-0.107056	-0.0883914	-0.0805925	-0.0275978	-0.109719	-0.112371	0.0828736	AT2G02560	CAND1 (CULLIN-ASSOCIATED AND NEDDYLATION DISSOCIATED); binding	0.0188631	0.0671859	-0.106591	-0.105411	-0.0207384	-0.104176	0.0939164	-0.128293	AT1G79350	EMB1135 (EMBRYO DEFECTIVE 1135); DNA binding	0.00191867	0.0812126	-0.147174	-0.390098	-0.350325	-0.0422059	-0.0422674	-0.0444758
AT1G79230	ST1 (MERCAPTOPYRUVATE SULFURTRANSFERASE 1)	0.194561	0.232562	0.241766	0.363938	0.220365	0.273987	0.16844	0.327069	AT1G77840	eukaryotic translation initiation factor 5, putative / eIF-5, putative	-0.197911	-0.122169	-0.214226	-0.202518	-0.21266	-0.247287	-0.0551745	-0.144111	AT2G02850	ARPN (PLANTACYANIN); copper ion binding	0.490033	0.483877	0.977861	0.992651	0.286722	0.30057	0.393852	0.427429	AT1G79580	ANAC033	-0.702612	-0.670254	-1.48504	-2.04194	-0.371851	-0.477589	-0.100424	-0.777832
AT1G79390	hypothetical protein	0.274709	0.177472	0.273256	0.155613	-0.0980281	0.148793	0.236454	0.183156	AT1G78020	senescence-associated protein-related	-0.253657	-0.63045	-0.680569	-0.489374	0.174442	-0.201683	-0.525001	-0.194174	AT2G03090	ATEXPA15 (ARABIDOPSIS THALIANA EXPANSIN A15)	1.017	1.23243	1.24411	1.32301	0.230674	1.28345	2.19471	2.31046	AT1G79600	ABC1 family protein	-0.240293	-0.301127	-0.419795	-0.521591	-0.402733	-0.629959	-0.851792	-0.862244
AT1G79450	LEM3 (ligand-effect modulator 3) family protein / CDC50 family protein	0.157684	0.168192	0.30718	0.690651	0.164733	0.364593	0.267504	0.726999	AT1G78100	F-box family protein	-0.203366	-0.303426	-0.282096	-0.18191	0.212408	0.0892942	0.235918	0.262012	AT2G03210	FUT2 (fucosyltransferase 2); fucosyltransferase/ transferase, transferring glycosyl groups	0.253441	0.467287	0.591133	3.14517	2.77403	1.8133	1.6809	2.67654	AT1G79630	protein phosphatase 2C family protein / PP2C family protein	-0.44626	-0.395889	-0.673374	-0.746024	-0.284514	-0.457458	-0.304355	-0.484976
AT1G79460	GA2 (GA REQUIRING 2); ent-kaurene synthase	0.489856	0.499621	0.461179	0.724324	0.486783	0.498391	0.694703	0.933489	AT1G78130	UNE2 (unfertilized embryo sac 2); carbohydrate transmembrane transporter/ sugar:hydrogen ion symporter	-0.177585	-0.117192	-0.120385	-0.0655164	0.136367	0.136327	0.340971	0.100637	AT2G03350	hypothetical protein	0.381299	0.259048	0.372601	0.219125	0.103018	0.154197	0.0714049	0.138383	AT1G79750	ATNADP-ME4 (NADP-MALIC ENZYME 4); malate dehydrogenase (oxaloacetate-decarboxylating) (NADP+)/ malic enzyme/ oxidoreductase, acting on NADH or NADPH, NAD or NADP as acceptor	-0.349992	-0.354101	-0.601901	-0.683437	-0.771106	-0.489329	-0.425269	-0.272009
AT1G79500	AtkdsA1 (Arabidopsis thaliana KDO-8-phosphate synthase A1); 3-deoxy-8-phosphooctulonate synthase	0.430213	0.239717	0.19121	-0.00673195	0.00428492	0.28063	0.108954	0.324197	AT1G78190	hypothetical protein	-0.320048	-0.234786	-0.204183	-0.115956	0.0535379	0.0774607	0.349003	0.10596	AT2G03360	hypothetical protein	0.240166	0.274301	0.525001	0.818973	0.574934	0.864563	0.553849	1.01307	AT1G79760	DTA4 (DOWNSTREAM TARGET OF AGL15-4)	-0.670949	-0.863471	-1.40473	-2.39179	-0.549117	-0.689121	-0.815124	-1.14299
AT1G79530	GAPCP-1; glyceraldehyde-3-phosphate dehydrogenase	0.103518	0.150308	0.0706402	0.183313	-0.154492	0.143543	0.170159	0.310908	AT1G78260	RNA recognition motif (RRM)-containing protein	-0.199766	-0.157582	-0.546262	-1.09959	-0.508819	-0.286372	-0.472795	-0.662619	AT2G03390	uvrB/uvrC motif-containing protein	0.207344	0.0707356	0.0674184	0.152422	0.272448	0.20482	0.0315582	0.266564	AT1G80070	SUS2 (ABNORMAL SUSPENSOR 2)	-0.00852196	0.0477312	-0.0804559	-0.141491	-0.319109	-0.0931866	-0.266948	-0.165642
AT1G79550	PGK (PHOSPHOGLYCERATE KINASE)	0.160132	0.156209	0.152869	0.325142	-0.018704	0.165531	0.239124	0.433764	AT1G78270	ATUGT85A4 (UDP-GLUCOSYL TRANSFERASE 85A4); UDP-glycosyltransferase/ glucuronosyltransferase/ transferase, transferring hexosyl groups	-0.550263	-0.884064	-1.3358	-1.40002	-0.0565901	-0.700409	-0.545859	-0.582248	AT2G03620	magnesium transporter CorA-like family protein (MRS2-5)	0.251607	0.208645	0.21133	0.261198	0.185268	0.270855	0.242575	0.417679	AT1G80160	lactoylglutathione lyase family protein / glyoxalase I family protein	0.778552	0.761879	0.272538	-0.0988967	0.170319	-0.435605	-0.622032	-0.413176
AT1G79690	ATNUDT3 (Arabidopsis thaliana Nudix hydrolase homolog 3); hydrolase	0.168613	0.0633193	0.000716532	0.0269003	0.0908394	0.241893	-0.0504593	0.599612	AT1G78320	ATGSTU23 (Arabidopsis thaliana Glutathione S-transferase (class tau) 23); glutathione transferase	-0.401546	-0.299712	-0.600001	-1.12233	-0.0817681	-0.199393	-0.422773	-0.589691	AT2G03680	SPR1 (SPIRAL1)	0.34663	0.370963	0.414744	0.35746	0.240799	0.260657	0.373754	0.401996	AT1G80300	ATNTT1; ATP:ADP antiporter	-0.626005	-0.36204	-0.295133	-0.403575	-0.216237	-0.547631	-0.212452	-0.588324
AT1G79710	integral membrane transporter family protein	0.265765	0.154498	0.127346	0.304459	-0.0893905	0.0846814	0.100158	0.374826	AT1G78410	VQ motif-containing protein	-0.158813	-0.665424	-0.739154	-0.499176	0.442844	0.493143	0.74269	0.92976	AT2G04090	MATE efflux family protein	0.711218	0.884052	1.94869	2.30826	0.60802	1.36453	1.41652	1.89112	AT1G80340	GA4H (gibberellin 3 beta-hydroxylase); gibberellin 3-beta-dioxygenase	-0.281245	-0.485247	-0.663523	-1.50777	-1.33106	-1.19184	-1.64206	-1.88683
AT1G79820	SGB1; carbohydrate transmembrane transporter/ sugar:hydrogen ion symporter	0.482651	0.567241	0.633924	0.724231	0.177695	0.264936	0.387161	0.331286	AT1G78750	F-box family protein	-0.12524	-0.224063	-0.182356	-0.46532	0.0187753	-0.258607	-0.142813	-0.270697	AT2G04100	MATE efflux family protein	0.121057	0.0999175	0.644504	1.25255	0.304018	0.608587	0.781698	1.1764	AT1G80380	phosphoribulokinase/uridine kinase-related	-0.257389	-0.371923	-0.52766	-0.745158	-0.257846	-0.344392	-0.520624	-0.398143
AT1G80320	oxidoreductase, 2OG-Fe(II) oxygenase family protein	0.609353	0.726146	0.844944	0.830814	-0.274682	0.244631	0.131743	0.466738	AT1G78850	curculin-like (mannose-binding) lectin family protein	-0.105679	-0.191974	-0.251594	-0.713819	0.0794195	0.420851	0.221012	0.382964	AT2G04190	meprin and TRAF homology domain-containing protein / MATH domain-containing protein	1.83371	1.93282	2.16052	1.73584	1.1571	1.33707	1.15844	1.82552	AT1G80490	TPR1 (TOPLESS-RELATED 1)	-0.174062	-0.167581	-0.356839	-0.515547	-0.269476	-0.341616	-0.377941	-0.469436
AT1G80470	hypothetical protein	1.99189	1.60734	0.947758	0.775443	0.0338903	2.5026	2.24448	3.14179	AT1G78860	curculin-like (mannose-binding) lectin family protein	-0.0805125	-0.319209	-0.482442	-0.168516	0.85844	0.620928	0.092266	1.23616	AT2G04350	long-chain-fatty-acid--CoA ligase family protein / long-chain acyl-CoA synthetase family protein (LACS8)	0.253684	0.213608	0.314127	0.316874	0.20072	0.497438	0.330615	0.548122	AT1G80920	J8; heat shock protein binding / unfolded protein binding	-0.16904	-0.348886	-0.390452	-0.766225	-0.175607	-0.356733	-0.71566	-1.00058
AT1G80500	hypothetical protein	0.0607245	0.0670799	0.17692	0.191309	-0.0108129	-0.0469456	0.0759628	-0.262107	AT1G78895	hypothetical protein	-0.0921518	-0.229714	-0.131061	-0.191111	-0.0553192	-0.0615794	-0.16067	-0.093045	AT2G04410	hypothetical protein	0.155107	0.0684925	0.0593581	0.0417023	0.142048	0.0736571	0.183218	0.199169	AT2G01370	DNA-binding storekeeper protein-related	-0.029305	-0.0246761	-0.0405236	-0.0485206	-0.0500973	-0.0379693	-0.0675241	-0.0448602
AT1G80510	amino acid transporter family protein	0.0854049	0.0798436	0.224861	0.0564625	-0.104966	-0.0685256	-0.177298	-0.156898	AT1G79090	hypothetical protein	-0.143347	-0.113831	-0.113157	0.164994	0.153753	-0.128529	0.123159	-0.0270486	AT2G04420	nucleic acid binding	1.45181	1.843	2.34666	2.71831	1.70434	2.20704	2.24497	2.19227	AT2G01450	ATMPK17 (Arabidopsis thaliana MAP kinase 17); MAP kinase	-0.250652	-0.354702	-0.426048	-0.794574	-0.285163	-0.142616	-0.337194	-0.207518
AT1G80860	N-methyltransferase	0.113424	0.0838822	0.286875	0.297856	0.0421534	0.00725666	0.0566181	-0.0589722	AT1G79245	pseudo	-0.93419	0.210141	-0.165115	0.267692	0.19175	-0.363104	0.241481	-0.0684577	AT2G04515	hypothetical protein	1.12838	1.40616	2.3612	1.65343	0.811464	2.28063	1.67416	1.92031	AT2G01460	phosphoribulokinase/uridine kinase family protein	-0.221914	-0.329309	-0.435901	-0.568609	-0.171476	-0.203581	-0.386535	-0.376353
AT1G80870	protein kinase family protein	0.21854	0.323693	0.328897	0.214898	0.0423104	0.222363	0.293119	0.502402	AT1G79310	ATMC7 (METACASPASE 7); caspase	-0.302642	-0.560742	-0.351792	-0.130381	0.079122	0.436645	0.173526	0.476353	AT2G04600	pseudo	0.00509065	0.0913005	0.144349	0.0322695	0.0250806	0.388429	0.0182137	0.0165685	AT2G01690	binding	-0.118433	-0.17155	-0.319792	-0.441781	-0.424249	-0.350778	-0.257862	-0.402349
AT1G80880	pentatricopeptide (PPR) repeat-containing protein	0.221799	0.287407	0.405849	0.474414	0.0332995	0.169956	0.214833	0.458988	AT1G79470	inosine-5'-monophosphate dehydrogenase	-0.607515	-0.539816	-0.847013	-0.678872	-0.305411	-0.175995	-0.00586431	0.0200379	AT2G04860	pentatricopeptide (PPR) repeat-containing protein	0.306309	0.352065	0.458923	0.559931	0.242916	0.248725	0.432697	0.655463	AT2G01900	endonuclease/exonuclease/phosphatase family protein	-0.854495	-0.832162	-1.39278	-1.93048	-0.464875	-1.19868	-1.49256	-1.12097
AT1G80890	hypothetical protein	0.127551	0.151081	0.41956	0.36048	0.0481953	0.0647265	0.0947662	0.13758	AT1G79480	hypothetical protein	-0.31121	-0.189509	-0.760326	-1.09272	0.159187	-0.0228707	-0.199202	-0.595435	AT2G05050	pseudo	0.264195	0.27373	0.350838	0.456221	0.224799	0.259866	0.176718	0.360917	AT2G02020	proton-dependent oligopeptide transport (POT) family protein	-0.616791	-0.765063	-1.41925	-1.10961	-0.513402	-0.828554	-0.739606	-0.847792
AT1G80940	hypothetical protein	0.204234	0.144555	0.141838	0.311407	0.361967	0.267906	0.11716	0.248906	AT1G79490	EMB2217 (EMBRYO DEFECTIVE 2217)	-0.0977688	-0.126095	-0.247348	-0.389344	-0.20144	-0.125684	-0.00185945	0.133224	AT2G05250	DNAJ heat shock N-terminal domain-containing protein	0.186859	0.264923	0.13594	0.369669	0.346334	0.202421	0.328063	0.473707	AT2G02070	ATIDD5 (ARABIDOPSIS THALIANA INDETERMINATE(ID)-DOMAIN 5); nucleic acid binding / transcription factor/ zinc ion binding	-0.817961	-0.391544	-0.309203	-0.151174	-0.389914	-1.01393	-0.374681	-1.54631
AT1G80960	F-box protein-related	0.508969	0.458909	0.689109	0.680192	0.16261	0.216131	0.091549	0.337721	AT1G79670	RFO1 (RESISTANCE TO FUSARIUM OXYSPORUM 1); kinase	-0.158734	-0.264159	-0.259036	-0.477461	-0.159573	-0.0387841	-0.218302	-0.164159	AT2G05520	GRP-3 (GLYCINE-RICH PROTEIN 3)	0.0682393	0.154483	0.577032	0.888426	0.438886	0.544626	0.560611	0.715424	AT2G02450	ANAC034/ANAC035 (Arabidopsis NAC domain containing protein 34, Arabidopsis NAC domain containing protein 35); transcription factor	-0.323725	-0.347131	-0.365389	-0.772674	-0.284238	-0.296287	-0.352136	-0.574281
AT1G80980	hypothetical protein	0.170903	0.248153	0.312454	0.0688022	-0.0921889	0.00526462	0.269586	-0.205238	AT1G79680	wall-associated kinase, putative	-2.24803	-2.1003	-1.08649	-2.12232	-0.972341	-1.38945	-1.16867	0.0900939	AT2G05632	hypothetical protein	0.0428022	0.153916	0.298812	0.543299	0.268343	0.0912393	0.283632	0.0863263	AT2G02820	MYB88 (myb domain protein 88); DNA binding / transcription factor	-0.00990397	-0.223744	-0.466154	-1.24107	-0.21761	0.0334807	-0.374835	-0.492587
AT2G01060	myb family transcription factor	0.0791624	0.0991586	0.212946	0.205239	-0.00581691	0.0789735	0.034418	0.115153	AT1G79700	ovule development protein, putative	-0.120991	-0.126289	-0.281568	-0.637452	-0.288241	0.0358503	-0.168397	-0.459913	AT2G05840	PAA2 (20S PROTEASOME SUBUNIT PAA2); peptidase	0.125461	0.0969947	0.198167	0.227182	0.179377	0.190746	0.196198	0.146406	AT2G02870	kelch repeat-containing F-box family protein	-0.144393	-0.107806	-0.150091	-0.150712	-0.0357616	0.00727769	-0.04681	0.0704319
AT2G01090	ubiquinol-cytochrome C reductase complex 7 kDa protein, putative / mitochondrial hinge protein, putative	0.269445	0.193336	0.358162	0.382383	0.174385	0.076318	0.159489	0.0872296	AT1G79730	ELF7 (EARLY FLOWERING 7)	0.0773232	0.0335874	-0.0738515	0.154974	0.15013	0.131611	0.167879	0.516451	AT2G06005	hypothetical protein	0.169801	0.156046	0.0932527	0.435698	0.503134	0.57051	0.595193	0.90723	AT2G03060	AGL30; DNA binding / transcription factor	-0.243613	-0.262949	-0.510692	-0.823595	-0.41317	-0.269858	-0.183787	-0.439288
AT2G01180	ATPAP1 (PHOSPHATIDIC ACID PHOSPHATASE 1); phosphatidate phosphatase	0.0857904	0.794768	0.88851	0.52093	-0.18821	-0.134603	-0.236285	-0.128796	AT1G79910	hypothetical protein	-0.330289	-0.437446	-0.869052	-0.946609	-0.662989	-0.16576	-0.220317	-0.617564	AT2G06050	OPR3 (OPDA-REDUCTASE 3); 12-oxophytodienoate reductase	0.49483	0.789103	1.5035	1.72576	0.505035	0.701542	0.547146	1.09055	AT2G03240	EXS family protein / ERD1/XPR1/SYG1 family protein	-0.328806	-0.124745	-0.155619	-0.0186969	-0.0444345	-0.096176	-0.198124	0.0207411
AT2G01470	STL2P (SEC12P-LIKE PROTEIN); nucleotide binding	0.0644513	0.114	0.159013	0.328203	0.114328	0.0511179	0.201054	0.208229	AT1G79915	hypothetical protein	-0.647598	-0.857881	-1.57272	-1.82692	-0.5744	-0.156905	-0.0116697	-0.768056	AT2G06255	ELF4-L3 (ELF4-LIKE 3)	0.409486	0.274658	0.644259	0.801845	0.207414	0.292319	0.158277	0.277001	AT2G03505	glycosyl hydrolase family protein 17	-0.586287	-0.401536	-0.835275	-0.795847	-0.401698	-0.351058	-0.0827479	-0.439181
AT2G01710	DNAJ heat shock N-terminal domain-containing protein	0.0626756	0.0793271	0.196804	0.398508	0.349375	0.0759463	0.354819	0.244981	AT1G80050	APT2 (ADENINE PHOSPHORIBOSYL TRANSFERASE 2); adenine phosphoribosyltransferase	-0.067889	-0.23816	-0.168166	-0.213206	-0.231372	0.0470939	-0.00587137	0.0648522	AT2G06510	replication protein, putative	0.0808103	0.141748	0.0628024	0.374169	0.228094	0.163011	0.189378	0.536484	AT2G03720	MRH6 (morphogenesis of root hair 6)	-0.462668	-0.739517	-1.32984	-1.94504	-0.793231	-0.659389	-0.912601	-1.42253
AT2G01730	ATCPSF73-II (CLEAVAGE AND POLYADENYLATION SPECIFICITY FACTOR 73 KDA SUBUNIT-II); catalytic/ protein binding	0.132413	0.286279	0.370217	0.785236	0.192192	0.0999505	0.416202	0.677066	AT1G80100	AHP6 (ARABIDOPSIS HISTIDINE PHOSPHOTRANSFER PROTEIN 6); transferase, transferring phosphorus-containing groups	-0.317147	-0.163499	-0.75477	-1.27888	-0.670731	-0.311783	0.0850719	-0.661476	AT2G06985	pseudo	1.04855	1.0616	1.34782	3.00371	2.81337	1.98959	1.73196	3.02509	AT2G03730	ACR5 (ACT Domain Repeat 5)	-0.437715	-0.614035	-0.73887	-0.752879	-0.317296	-0.316268	-0.538089	-0.436031
AT2G01913	hypothetical protein	0.452134	0.364896	0.540104	0.443849	-0.366137	0.00853427	0.145438	0.196959	AT1G80240	hypothetical protein	-0.300146	-0.473598	-0.639073	-0.609784	-0.159861	0.363754	0.617219	0.877943	AT2G07787	hypothetical protein	0.871064	1.01072	0.688535	0.79008	0.523782	0.810613	0.696652	0.536579	AT2G03822	hypothetical protein	-1.07565	-0.400259	-0.862199	-0.872506	-0.803393	-0.728113	-0.987315	-1.77679
AT2G01980	SOS1 (SALT OVERLY SENSITIVE 1); sodium:hydrogen antiporter	0.219162	0.120617	0.196642	0.40384	0.145045	0.172291	0.042778	0.442129	AT1G80300	ATNTT1; ATP:ADP antiporter	-0.626005	-0.36204	-0.295133	-0.403575	-0.216237	-0.547631	-0.212452	-0.588324	AT2G10931	hypothetical protein	0.226736	0.321355	0.427624	0.442684	0.11536	0.103573	0.269814	0.14307	AT2G04025	hypothetical protein	-0.497108	-0.525058	-1.04229	-1.87477	-0.175331	-0.527972	-0.129373	-0.969245
AT2G02010	GAD4 (GLUTAMATE DECARBOXYLASE 4); calmodulin binding	0.978738	1.09905	1.23843	1.16136	-0.97754	0.221109	0.361812	0.397991	AT1G80730	ZFP1 (ARABIDOPSIS THALIANA ZINC-FINGER PROTEIN 1); nucleic acid binding / transcription factor/ zinc ion binding	-0.255912	-0.445537	-0.240031	-0.344738	0.22592	0.0370538	0.0245209	-0.0138489	AT2G11140	pseudo	0.534624	0.704152	0.946797	0.835716	0.30573	0.341701	0.271232	0.439247	AT2G04038	ATBZIP48 (ARABIDOPSIS THALIANA BASIC LEUCINE-ZIPPER 48); DNA binding / transcription factor	-1.76821	-2.18144	-2.82122	-3.38988	-1.48555	-1.9922	-3.02228	-3.83203
AT2G02240	MEE66 (maternal effect embryo arrest 66)	0.693912	0.860498	1.11249	1.029	0.489079	0.599018	0.505538	0.0595644	AT1G80970	XH domain-containing protein	-0.152592	-0.226891	-0.127912	-0.296666	-0.0503559	-0.0229645	0.0784413	-0.0692181	AT2G12190	cytochrome P450, putative	0.418332	0.22099	0.507326	1.00568	0.31383	0.340636	0.270186	0.993046	AT2G04040	ATDTX1; antiporter/ multidrug efflux pump/ multidrug transporter/ transporter	-2.28262	-1.90538	-1.4971	-0.560099	-1.39734	-1.85806	-0.881327	-1.35255
AT2G02250	ATPP2-B2 (Phloem protein 2-B2); carbohydrate binding	0.99929	0.913831	1.02885	0.820239	0.182576	1.1215	0.718877	1.10905	AT2G01110	APG2 (ALBINO AND PALE GREEN 2)	-0.142766	-0.139835	-0.212698	-0.301017	-0.0719266	-0.218149	-0.0499092	-0.382902	AT2G12462	hypothetical protein	0.792011	0.730326	0.816276	0.528795	0.0302918	0.198122	0.310044	0.378321	AT2G04240	XERICO; protein binding / zinc ion binding	-0.127663	-0.267868	-0.256347	-0.550283	-0.242135	-0.165934	-0.322642	-0.355545
AT2G02370	hypothetical protein	0.0963896	0.0169699	0.285193	0.339248	0.256674	0.175584	-0.0351897	0.188598	AT2G01275	zinc finger (C3HC4-type RING finger) family protein	-0.215379	-0.36049	-0.630517	-1.09119	-0.189312	0.176172	-0.248973	-0.242829	AT2G12890	pseudo	0.00499218	0.0175623	0.0101689	0.029757	0.0202623	0.00786097	0.0152955	0.0126769	AT2G05270	hypothetical protein	-0.833019	-0.616287	-1.36063	-0.861239	-0.634569	-0.660964	-0.658625	-0.933269
AT2G02400	cinnamoyl-CoA reductase family	0.164084	0.157417	0.232171	0.0258962	0.149241	0.0441407	0.0100834	0.00922678	AT2G01340	hypothetical protein	-0.361943	-0.467498	-0.520753	-1.02894	-0.184887	-0.193303	-0.135172	-0.221439	AT2G13790	ATSERK4 (SOMATIC EMBRYOGENESIS RECEPTOR-LIKE KINASE 4); protein binding / protein kinase/ transmembrane receptor protein serine/threonine kinase	0.1261	0.61547	0.701132	0.841326	0.147167	0.335341	0.182	0.536633	AT2G05530	glycine-rich protein	-1.66488	-1.04961	-1.20386	-1.47138	-0.577305	-1.04965	-1.36001	-0.99309
AT2G02740	ATWHY3/PTAC11 (A. THALIANA WHIRLY 3)	0.21944	0.161764	0.0871307	0.200216	-0.0670712	0.00712621	0.167535	0.206137	AT2G01360	hypothetical protein	-1.17157	-3.27659	-3.25592	-1.40833	-1.26642	-3.19935	-3.27642	-0.687642	AT2G13810	ALD1 (AGD2-LIKE DEFENSE RESPONSE PROTEIN1); transaminase	1.40008	1.67606	2.03712	1.86116	0.823616	1.57995	0.779756	2.46844	AT2G05995	misc_RNA	-0.244053	-0.568159	-0.685229	-0.875375	-0.927136	-0.931	-1.50176	-1.44714
AT2G02750	pentatricopeptide (PPR) repeat-containing protein	0.377476	0.34901	0.317677	0.269536	0.140824	0.366155	0.423247	0.696904	AT2G01400	hypothetical protein	-0.101897	-0.213285	-0.228779	-0.219855	0.944356	0.613862	0.620789	0.884724	AT2G14110	hypothetical protein	0.261101	0.197822	0.330173	0.16543	0.222804	0.301647	0.255297	0.231333	AT2G06210	ELF8 (EARLY FLOWERING 8); binding	-0.126272	0.0259596	-0.0695483	0.457095	0.185408	0.145008	0.328864	0.719548
AT2G02990	RNS1 (RIBONUCLEASE 1); endoribonuclease	1.27349	0.0971825	2.56098	2.77325	-0.924015	0.70132	-0.23396	0.579336	AT2G01430	homeobox-leucine zipper protein 17 (HB-17) / HD-ZIP transcription factor 17	-0.447445	-0.554338	-0.333555	-0.22855	-0.107673	0.305161	-0.174078	0.355951	AT2G14210	ANR1; DNA binding / transcription factor	1.36951	1.36812	1.47118	0.712271	0.597556	1.08561	0.888584	0.684525	AT2G07130	pseudo	-0.193921	-0.151059	-0.292943	-0.738036	-0.343261	-0.282168	-0.184132	-0.369035
AT2G03020	heat shock protein-related	0.325348	0.862487	1.41431	0.935568	0.234945	0.0969681	0.452639	0.325324	AT2G01450	ATMPK17 (Arabidopsis thaliana MAP kinase 17); MAP kinase	-0.250652	-0.354702	-0.426048	-0.794574	-0.285163	-0.142616	-0.337194	-0.207518	AT2G14890	AGP9 (ARABINOGALACTAN PROTEIN 9)	0.228249	0.254833	0.0959942	0.0380129	-0.107466	-0.0747691	0.0798447	-0.0601917	AT2G07712	pseudo	-0.632167	-0.547413	-0.844464	-0.827167	-1.03264	-1.31445	-0.982027	-1.5495
AT2G03070	hypothetical protein	0.245969	0.257459	0.198882	0.159431	0.0819501	0.248937	0.236932	0.228065	AT2G01464	hypothetical protein	-0.0991424	-0.098115	-0.358551	-0.375703	-0.0334263	0.047342	-0.100122	0.00383481	AT2G15050	LTP; lipid binding	0.577172	0.32407	0.807842	0.994587	0.295197	0.456932	0.352453	0.130141	AT2G07739	hypothetical protein	-0.199856	0.00232445	0.117827	0.102239	-0.151316	-0.301838	-0.203881	-0.556905
AT2G03430	ankyrin repeat family protein	0.17924	0.186195	0.315239	0.302767	0.0291565	0.105881	0.147138	0.0376738	AT2G01530	MLP329 (MLP-LIKE PROTEIN 329)	-0.265212	-0.715857	-0.585259	-0.751514	0.435737	0.551908	0.0709282	0.454803	AT2G15090	fatty acid elongase, putative	0.289716	0.522462	0.844735	0.950066	0.326286	0.275536	0.230033	0.465626	AT2G07786	pseudo	-0.655485	-0.247141	-0.302363	-0.138422	-0.416338	-1.3838	-1.13847	-1.41839
AT2G03480	dehydration-responsive protein-related	0.093382	0.182482	0.106521	0.0865581	0.135875	-0.129243	0.140671	-0.0940251	AT2G01540	C2 domain-containing protein	-0.180717	-0.292499	-0.180882	-0.160592	-0.0294364	-0.0639324	-0.3714	-0.261678	AT2G15120	pseudo	0.24288	0.522826	0.751864	0.935151	0.369993	0.265831	0.383778	0.48839	AT2G10820	pseudo	-0.0683136	-0.0887766	-0.107977	-0.117629	-0.129581	-0.13303	-0.126862	-0.0910161
AT2G03510	band 7 family protein	0.191226	0.0952978	0.163584	0.200699	0.0151604	0.129102	0.0397877	0.371316	AT2G01630	glycosyl hydrolase family 17 protein / beta-1,3-glucanase, putative	-0.243976	-0.0736371	-0.408094	-0.272586	-0.0344144	-0.0534488	0.191523	0.300137	AT2G15290	ATTIC21/CIA5/PIC1/TIC21 (CHLOROPLAST IMPORT APPARATUS 5); copper uptake transmembrane transporter/ iron ion transmembrane transporter/ protein homodimerization	0.314795	0.329783	0.343552	0.356473	0.232433	-0.0932801	0.191399	0.26886	AT2G11810	MGDC (monogalactosyldiacylglycerol synthase type C); 1,2-diacylglycerol 3-beta-galactosyltransferase	-0.333378	-1.19562	-1.21633	-0.832225	-0.918521	-1.05139	-1.15824	-1.06617
AT2G03780	translin family protein	0.159275	0.148529	0.10732	0.0545787	-0.0293082	0.0118286	0.0988857	0.064283	AT2G01880	ATPAP7/PAP7 (purple acid phosphatase 7); acid phosphatase/ protein serine/threonine phosphatase	-0.100225	-0.329648	-0.148388	-0.661357	-0.297317	0.282441	-0.236933	-0.0684465	AT2G15580	zinc finger (C3HC4-type RING finger) family protein	0.330644	0.133586	0.379717	0.408776	0.391104	0.376404	0.25745	0.126095	AT2G11880	pseudo	-0.254333	-0.334586	-0.415633	-0.690047	-0.374069	-0.374764	-0.554219	-0.824309
AT2G03870	small nuclear ribonucleoprotein, putative / snRNP, putative / Sm protein, putative	0.07547	0.0445655	0.095624	0.0712645	0.0185761	-0.0131865	0.0412979	-0.118431	AT2G01910	ATMAP65-6; microtubule binding	-0.130816	-0.055541	-0.116748	-0.0906325	0.277599	0.155305	0.204258	0.172726	AT2G16070	PDV2 (PLASTID DIVISION2)	0.221133	0.170068	0.301631	0.316557	0.132983	0.136712	0.189119	0.184018	AT2G12646	hypothetical protein	-0.918192	-0.92828	-1.92485	-2.02852	-0.762695	-0.516482	-0.212018	-0.811038
AT2G04032	ZIP7 (ZINC TRANSPORTER 7 PRECURSOR); cation transmembrane transporter	0.423863	0.304626	0.519944	0.253811	0.332949	-0.45873	-0.904256	-0.574508	AT2G01950	BRL2 (BRI1-LIKE 2); ATP binding / protein serine/threonine kinase	-0.481715	-0.254329	-0.600861	-0.782669	0.141451	-0.332782	0.0816585	-0.809486	AT2G16367	pseudo	0.688745	3.87879	5.36543	5.78169	3.66765	4.55377	5.82501	5.71782	AT2G13360	AGT (ALANINE:GLYOXYLATE AMINOTRANSFERASE)	-0.109507	-0.335012	-0.304492	-0.445007	-0.151982	-0.023067	-0.145498	-0.209215
AT2G04033	pseudo	1.74707	1.34028	1.69273	1.30647	1.05382	0.174372	-0.538555	-0.984331	AT2G02360	ATPP2-B10 (Phloem protein 2-B10); carbohydrate binding	0.00132893	-0.0981864	-0.0454777	0.00982188	0.193026	0.0740792	-0.145707	0.227433	AT2G16700	ADF5 (ACTIN DEPOLYMERIZING FACTOR 5); actin binding	0.599524	0.961281	1.49317	1.6361	0.573809	0.515235	0.551911	0.544424	AT2G13440	glucose-inhibited division family A protein	-0.0803743	-0.163588	-0.40097	-0.663812	-0.29842	-0.13086	-0.254439	-0.25919
AT2G04110	pseudo	0.11074	-0.0101118	0.132781	-0.0101983	0.499077	0.540449	0.455542	0.665732	AT2G02380	ATGSTZ2 (Arabidopsis thaliana Glutathione S-transferase (class zeta) 2); glutathione transferase	-0.214666	-0.239883	-0.489108	-0.409484	0.0585788	0.173414	0.30382	-0.171706	AT2G16710	hesB-like domain-containing protein	0.168479	0.243601	0.489523	0.737071	0.428228	0.214566	0.184359	0.102692	AT2G13500	hypothetical protein	-0.0459096	-0.0480361	-0.0714499	-0.0710554	-0.0730845	-0.0629697	-0.100377	-0.0558153
AT2G04230	F-box family protein	0.208692	0.124243	0.224611	0.232921	0.0722014	0.072012	0.230344	0.127598	AT2G02690	protein binding / zinc ion binding	-0.426103	-0.141523	-0.952249	-1.56682	-0.819774	-0.0806272	-0.185966	-1.12385	AT2G16720	MYB7 (myb domain protein 7); DNA binding / transcription factor	0.139746	0.130178	0.0510314	0.211228	0.527923	0.496567	0.321737	0.532766	AT2G14160	nucleic acid binding	-1.90829	-1.87627	-1.90232	-1.88379	-1.88521	-1.91295	-1.89282	-1.87922
AT2G04340	hypothetical protein	0.186019	0.161085	0.285661	0.394489	0.202968	0.065256	0.0709557	0.0660781	AT2G02710	PAC motif-containing protein	-0.335239	-0.446033	-0.394028	-0.393364	-0.171019	-0.28826	-0.666307	-0.631614	AT2G16770	DNA binding / transcription factor	0.25849	0.308887	0.434999	0.610265	0.29126	0.291278	0.379499	0.573439	AT2G14170	ALDH6B2 (Aldehyde dehydrogenase 6B2)	-0.239138	-0.305489	-0.375772	-0.610753	-0.232519	-0.345255	-0.253386	-0.475177
AT2G04880	ZAP1 (WRKY FAMILY TRANSCRIPTION FACTOR 1); transcription activator/ transcription factor	0.171472	0.167411	0.273437	0.351738	0.0933534	0.134197	0.160033	0.25687	AT2G02780	leucine-rich repeat transmembrane protein kinase, putative	-0.0578286	-0.0870054	-0.173861	-0.229127	-0.0834285	0.0409476	-0.0700162	-0.0979821	AT2G16990	tetracycline transporter	0.634428	0.493485	0.502537	0.119464	0.900065	1.14344	1.00507	1.05742	AT2G14510	leucine-rich repeat protein kinase, putative	-0.606101	-0.624079	-0.588054	-0.841834	-1.07041	-1.38229	-1.97798	-1.46835
AT2G04925	hypothetical protein	1.41525	1.33842	1.57439	0.992572	1.15386	0.660066	-0.447414	0.0552372	AT2G02800	APK2B (PROTEIN KINASE 2B); kinase	-0.122493	-0.226067	-0.245788	-0.263165	-0.126181	-0.104654	-0.27582	-0.18719	AT2G17040	ANAC036 (Arabidopsis NAC domain containing protein 36); transcription factor	0.701197	1.77357	2.14697	1.79607	0.851694	1.55826	1.40494	1.3294	AT2G14820	phototropic-responsive NPH3 family protein	-0.638727	-0.78747	-1.63868	-1.86658	-0.742706	-0.392526	-0.447411	-0.707231
AT2G05430	hypothetical protein	1.48658	1.48945	2.18741	1.14386	0.756414	1.4282	0.755407	-0.0322369	AT2G02820	MYB88 (myb domain protein 88); DNA binding / transcription factor	-0.00990397	-0.223744	-0.466154	-1.24107	-0.21761	0.0334807	-0.374835	-0.492587	AT2G17120	LYM2 (LYSM DOMAIN GPI-ANCHORED PROTEIN 2 PRECURSOR)	0.458832	0.579654	0.908253	1.58911	0.804987	0.74652	0.711826	1.37007	AT2G14960	GH3	-0.548593	-0.545008	-1.33065	-1.76875	-0.518235	-0.46544	-0.451779	-1.27028
AT2G05810	armadillo/beta-catenin repeat family protein	0.174836	0.856501	1.91726	3.42567	0.0237123	-1.01292	0.471386	-2.70618	AT2G02870	kelch repeat-containing F-box family protein	-0.144393	-0.107806	-0.150091	-0.150712	-0.0357616	0.00727769	-0.04681	0.0704319	AT2G17150	RWP-RK domain-containing protein	0.290063	0.21142	0.154296	0.203621	0.0427417	0.148999	0.118659	0.249171	AT2G15020	hypothetical protein	-0.214197	-0.7732	-0.755487	-1.28521	-0.328325	-1.15656	-1.25036	-1.20347
AT2G05940	protein kinase, putative	0.182562	0.546184	0.642697	0.516964	-0.0728116	-0.17252	-0.140814	-0.27676	AT2G02955	MEE12 (maternal effect embryo arrest 12); zinc ion binding	-0.303963	-0.216198	-0.271232	-0.188446	-0.309256	-0.328115	-0.167021	0.0195003	AT2G17240	hypothetical protein	0.238818	0.177904	0.131914	0.366266	0.254092	0.167841	0.327565	0.251921	AT2G15025	beta-galactosidase	-1.26155	-0.837736	-2.45186	-3.07402	-3.10339	-3.15274	-3.0979	-3.09853
AT2G06002	misc_RNA	0.608465	0.422261	0.84081	0.935654	0.0366546	0.0655476	-0.295148	-0.0326807	AT2G02960	zinc finger (C3HC4-type RING finger) family protein	-0.323024	-0.145361	-0.334042	-0.387436	0.0664649	-0.282627	0.1934	-0.67174	AT2G17442	hypothetical protein	0.369597	0.414561	0.433197	0.402724	0.400276	0.355567	0.470851	0.530336	AT2G15220	secretory protein, putative	-1.06945	-0.960646	-0.414271	-0.431696	-0.862314	-0.68198	-0.788479	-0.72804
AT2G07669	hypothetical protein	-0.0935282	0.354274	0.222904	0.513854	-0.117554	-0.284621	-0.362011	-0.253013	AT2G03130	ribosomal protein L12 family protein	-0.585713	-0.606841	-0.615418	-0.519446	-0.631447	-0.573633	-0.326918	-0.614516	AT2G17560	HMGB4 (HIGH MOBILITY GROUP B 4); transcription factor	0.222827	0.239408	0.108513	0.0599699	0.0413193	0.165466	0.290884	0.168251	AT2G15390	FUT4 (fucosyltransferase 4); fucosyltransferase	-0.54916	-0.793555	-1.10588	-1.34076	-0.617973	-0.209454	-0.703895	-0.607905
AT2G07677	pseudo	0.12627	0.799509	0.868883	0.830772	0.0781622	-0.138252	-0.47137	-0.874378	AT2G03140	CAAX amino terminal protease family protein	-0.0100417	-0.00745487	-0.171076	-0.0849785	-0.16052	0.0516427	0.331466	0.444664	AT2G17660	nitrate-responsive NOI protein, putative	1.92843	1.88288	3.04908	4.16541	0.303753	0.657759	1.33639	0.200538	AT2G15720	pseudo	-0.604132	-0.652666	-0.638635	-0.647641	-0.645131	-0.689906	-0.619278	-0.587061
AT2G07681	cytochrome c biogenesis protein, putative	0.451963	0.477221	0.714007	0.723893	0.55111	-0.00758627	0.0231241	0.00194155	AT2G03530	UPS2 (UREIDE PERMEASE 2)	-0.0949977	-0.388059	-0.326278	-0.585239	-0.0980722	0.305025	0.0100938	0.244784	AT2G17840	ERD7 (EARLY-RESPONSIVE TO DEHYDRATION 7)	0.604383	0.404611	0.714392	0.840576	-0.0422279	0.238877	-0.098963	0.271003	AT2G16280	very-long-chain fatty acid condensing enzyme, putative	-0.414815	-0.161071	-0.0945034	-0.625667	-0.641348	-0.814705	-0.688957	-1.33438
AT2G07692	hypothetical protein	0.138929	0.147332	0.457663	0.122572	0.223591	0.638063	0.176287	0.0692852	AT2G03590	ATUPS1 (Arabidopsis thaliana ureide permease 1); allantoin uptake transmembrane transporter	-0.248413	-0.463091	-0.473937	-0.291349	-0.0615422	0.315053	0.252048	0.293223	AT2G18010	auxin-responsive family protein	1.15802	1.20911	1.60134	3.52072	2.39293	1.71579	1.34315	1.92716	AT2G16365	F-box family protein	-0.0223447	0.00675647	0.659599	0.00104125	1.12494	-0.0590247	0.780461	0.0179422
AT2G07709	pseudo	0.271443	0.236799	0.0950842	0.172106	0.123391	0.0134546	-0.00692904	-0.117165	AT2G03640	nuclear transport factor 2 (NTF2) family protein / RNA recognition motif (RRM)-containing protein	-0.177765	-0.129963	-0.252528	-0.415648	-0.0777912	0.0882844	-0.0473684	-0.165302	AT2G18050	HIS1-3 (HISTONE H1-3); DNA binding	1.20156	0.541111	1.47707	2.06857	3.4835	4.3756	4.7328	5.07768	AT2G16500	ADC1 (ARGININE DECARBOXYLASE 1)	-0.311469	-0.270231	-0.605198	-0.717652	-0.262272	-0.334486	-0.296936	-0.416972
AT2G07728	hypothetical protein	0.167056	0.338641	0.582496	0.450804	0.34475	-0.233207	-0.170576	-0.457367	AT2G04030	CR88 (EMBRYO DEFECTIVE 1956); ATP binding	-0.162066	-0.0410715	-0.156011	-0.198747	-0.360079	-0.177044	0.0601332	-0.218668	AT2G18150	peroxidase, putative	0.736034	0.66842	0.540415	0.412907	0.340065	0.294122	0.595627	0.794463	AT2G16740	UBC29 (UBIQUITIN-CONJUGATING ENZYME 29); ubiquitin-protein ligase	-0.494481	-0.285145	-0.734464	-1.00655	-0.292429	-0.513414	-0.461375	-0.886767
AT2G07734	ribosomal protein S4 (RPS4)	0.339659	0.385554	0.164816	0.757328	0.490844	-0.00423915	0.271832	0.153489	AT2G04430	ATNUDT5 (Arabidopsis thaliana Nudix hydrolase homolog 5); hydrolase	-0.102795	-0.265363	-0.51589	-0.653846	-0.399572	0.00386538	-0.221585	-0.0373073	AT2G18230	ATPPA2 (ARABIDOPSIS THALIANA PYROPHOSPHORYLASE 2); inorganic diphosphatase/ pyrophosphatase	0.303196	0.376377	0.473885	0.394	0.644344	0.835829	0.647759	0.802139	AT2G16750	protein kinase family protein	-0.216692	-0.36386	-0.474096	-0.661207	-0.338292	-0.198816	-0.470917	-0.508158
AT2G07772	hypothetical protein	-0.0793427	0.137541	0.315501	0.252122	-0.286708	-0.634912	-0.704714	-0.970569	AT2G04480	hypothetical protein	-1.1153	-0.479122	-0.843006	-0.709111	-0.346591	-1.01536	0.423674	-2.06804	AT2G18240	RER1 protein, putative	0.142156	0.146676	0.296011	0.25555	0.147656	0.0746612	0.0975865	0.0697084	AT2G16760	hypothetical protein	-0.439414	-0.630348	-0.525123	-0.796918	-0.451961	-0.31538	-0.837566	-0.59772
AT2G07774	hypothetical protein	0.495828	0.238613	0.416361	0.507993	0.17131	-0.0301327	-0.0323067	-0.0550368	AT2G04500	DC1 domain-containing protein	-1.14562	-1.46688	-1.2373	-1.7192	-0.07601	0.268707	0.456004	0.127807	AT2G18300	basic helix-loop-helix (bHLH) family protein	0.42458	0.337054	0.564086	0.677819	0.255822	0.340306	0.227607	0.382714	AT2G16970	MEE15 (maternal effect embryo arrest 15); tetracycline transporter	-0.746522	-1.2533	-1.85504	-2.51206	-0.824325	-0.87708	-1.51746	-1.90895
AT2G07787	hypothetical protein	0.871064	1.01072	0.688535	0.79008	0.523782	0.810613	0.696652	0.536579	AT2G04795	hypothetical protein	-0.385913	-0.225161	-0.134561	-0.04399	0.656275	-0.128948	-0.181408	-0.401581	AT2G18470	protein kinase family protein	0.507466	1.68872	1.4147	0.565106	1.05592	0.743239	2.26171	0.523419	AT2G17070	hypothetical protein	-0.60635	-0.669661	-1.16751	-1.71179	-1.08424	-0.802585	-0.931004	-1.90222
AT2G09795	miscRNA	0.108656	0.160221	0.346856	0.353748	-0.114596	-0.170206	0.0101748	-0.279307	AT2G04842	EMB2761 (EMBRYO DEFECTIVE 2761); threonine-tRNA ligase	-0.0704518	-0.221475	-0.571807	-0.831155	-0.1369	-0.0154938	-0.121357	-0.0156643	AT2G18620	geranylgeranyl pyrophosphate synthase, putative / GGPP synthetase, putative / farnesyltranstransferase, putative	0.713176	0.466218	0.136169	0.119008	1.01025	0.976597	1.08689	1.35022	AT2G17080	hypothetical protein	-0.846467	-0.713323	-1.37876	-1.72066	-0.691488	-0.698569	-0.713704	-1.36908
AT2G10560	hypothetical protein	0.128883	0.122499	0.128229	0.215619	-0.00437111	0.0864937	-0.0665732	0.325258	AT2G04940	scramblase-related	-0.0981385	-0.142779	-0.229176	-0.17996	-0.0487236	-0.0415823	-0.077168	0.039608	AT2G18660	EXLB3 (EXPANSIN-LIKE B3 PRECURSOR)	0.839378	1.74697	2.18291	1.8609	0.85506	3.76648	3.88695	4.1379	AT2G17370	HMG2 (3-HYDROXY-3-METHYLGLUTARYL-COA REDUCTASE 2)	-0.222682	-0.121688	-0.351935	-0.469067	-0.383627	-0.216395	-0.139036	-0.342281
AT2G10606	misc_RNA	0.240749	0.229173	0.296458	0.43422	-0.112612	0.119286	0.492319	0.508608	AT2G05185	hypothetical protein	-0.0765074	-0.150976	-0.352149	-0.182133	0.243092	0.149975	0.287587	0.182043	AT2G18740	small nuclear ribonucleoprotein E, putative / snRNP-E, putative / Sm protein E, putative	0.255794	0.185826	0.257746	0.512746	0.248891	0.200398	0.250846	0.145807	AT2G17420	NTRA (NADPH-dependent thioredoxin reductase 2)	-0.236837	-0.0411419	-0.145635	-0.185775	-0.120385	-0.10228	-0.0523485	-0.176783
AT2G10950	BSD domain-containing protein	0.0734873	0.0670516	0.131049	0.182326	0.0928167	-0.499992	-0.0381433	0.195543	AT2G05330	speckle-type POZ protein-related	-0.899823	-0.548352	-1.17487	-1.83744	-0.0995581	-0.61683	-0.292165	-1.23539	AT2G18969	transcription regulator	1.50979	1.24468	1.43907	1.01214	0.228393	0.587132	0.469764	0.403403	AT2G17430	ATMLO7/MLO7 (MILDEW RESISTANCE LOCUS O 7); calmodulin binding	-0.696905	-0.915581	-1.20616	-1.35312	-0.0843311	-0.101112	-0.197214	-0.228729
AT2G11890	adenylate cyclase	0.0268937	0.059257	-0.0240357	0.0798729	0.0203911	-0.0697136	0.0212041	0.142171	AT2G05380	GRP3S (GLYCINE-RICH PROTEIN 3 SHORT ISOFORM)	-0.260589	-0.720234	-0.398737	-0.239296	-0.352263	0.563166	0.595922	0.969014	AT2G19310	hypothetical protein	0.344191	0.263251	0.518456	0.500433	0.284655	0.272581	0.248734	0.112795	AT2G17710	hypothetical protein	-0.140487	-0.333094	-0.276899	-0.481071	-0.482091	-0.543379	-0.89777	-0.915383
AT2G11891	hypothetical protein	0.325116	0.594183	0.693976	0.66652	-0.160925	0.229501	0.467458	0.562565	AT2G05540	glycine-rich protein	-0.76342	-1.15106	-1.17029	-0.983687	0.448398	0.274952	-0.151587	-0.508993	AT2G19340	hypothetical protein	0.0750233	0.030824	0.0215914	0.0609122	0.223125	0.245508	0.18657	0.311054	AT2G17723	hypothetical protein	-0.456809	-0.447393	-0.458309	-0.457386	-0.472271	-0.458196	-0.482836	-0.468726
AT2G12462	hypothetical protein	0.792011	0.730326	0.816276	0.528795	0.0302918	0.198122	0.310044	0.378321	AT2G05580	pseudo	-0.582738	-0.595536	-0.578973	-0.0528044	0.291485	-0.593379	0.177544	-0.571677	AT2G19780	leucine-rich repeat family protein / extensin family protein	0.318355	0.303714	0.577751	0.421107	0.243203	0.287539	0.221639	0.123475	AT2G17880	DNAJ heat shock protein, putative	-0.445885	-0.494466	-0.684834	-1.36631	-1.11369	-0.628356	-1.21232	-1.24046
AT2G12465	LCR50 (Low-molecular-weight cysteine-rich 50)	3.52742	3.10419	3.30317	2.82022	2.35547	2.3612	1.37845	0.0269542	AT2G05710	aconitate hydratase, cytoplasmic, putative / citrate hydro-lyase/aconitase, putative	-0.0704181	-0.105026	-0.272199	-0.190234	0.0614719	0.284973	0.186099	0.39607	AT2G19790	clathrin adaptor complex small chain family protein	0.159297	0.12983	0.211417	0.192171	0.202642	0.163443	0.137734	0.158062	AT2G17930	FAT domain-containing protein / phosphatidylinositol 3- and 4-kinase family protein	-0.322049	-0.234301	-0.650307	-0.806654	-0.77481	-0.446837	-0.572753	-0.301198
AT2G13290	glycosyl transferase family 17 protein	0.158522	0.160289	0.419731	0.554382	0.307715	0.175973	0.191661	0.464087	AT2G05830	eukaryotic translation initiation factor 2B family protein / eIF-2B family protein	-0.0952535	-0.140835	-0.132282	-0.369769	-0.124605	-0.0324388	-0.0930676	-0.118135	AT2G19850	hypothetical protein	0.00579995	0.0159275	0.00931155	0.0819392	0.0194479	0.0066144	0.0143646	0.0117895	AT2G18110	elongation factor 1-beta, putative / EF-1-beta, putative	-0.0518125	-0.0310404	-0.0174339	-0.0460338	-0.2486	-0.225108	-0.141458	-0.192096
AT2G13600	pentatricopeptide (PPR) repeat-containing protein	0.15532	0.323708	0.333203	0.303845	-0.186554	-0.0859764	0.12285	0.19236	AT2G06040	hypothetical protein	-0.074201	-0.171545	-0.396179	-0.283791	0.0730227	0.26233	0.332179	0.479754	AT2G19900	ATNADP-ME1 (NADP-MALIC ENZYME 1); malate dehydrogenase (oxaloacetate-decarboxylating) (NADP+)/ malic enzyme/ oxidoreductase, acting on NADH or NADPH, NAD or NADP as acceptor	0.404753	0.49771	1.20803	2.16397	1.64619	1.723	1.4425	2.22122	AT2G18160	ATBZIP2/GBF5 (G-BOX BINDING FACTOR 5); DNA binding / protein heterodimerization/ transcription factor	-0.640109	-0.773376	-0.892644	-1.3581	-0.473495	-0.537738	-0.454563	-0.862011
AT2G13650	GONST1 (GOLGI NUCLEOTIDE SUGAR TRANSPORTER 1); nucleotide-sugar transmembrane transporter	0.188651	0.202004	0.319131	0.318505	-0.0138982	0.0723065	-0.0355029	0.0475533	AT2G06983	SCRL16 (SCR-Like 16)	-0.207828	-0.232834	-0.199184	-0.201206	-0.160921	-0.259863	-0.231954	-0.158649	AT2G19970	pathogenesis-related protein, putative	1.19039	0.914263	0.913398	0.677976	0.585943	0.489021	0.610066	0.920914	AT2G18200	hypothetical protein	-0.813422	-1.33873	-0.830092	-0.201831	-0.156613	-0.240337	-0.748184	-0.392659
AT2G13665	miscRNA	0.18863	0.240014	0.539074	0.821714	0.357417	0.0240797	0.247277	0.0091703	AT2G07140	F-box family protein	-1.4561	-1.82061	-2.54278	-0.448505	0.779287	-0.0460364	-0.05733	0.657477	AT2G19990	PR-1-LIKE (PATHOGENESIS-RELATED PROTEIN-1-LIKE)	0.723739	0.659566	1.02276	0.722922	0.169782	0.24733	0.449479	0.496373	AT2G18210	hypothetical protein	-0.903575	-1.41051	-0.886055	-0.268034	-0.320798	-0.426895	-0.816672	-0.690465
AT2G13800	ATSERK5 (SOMATIC EMBRYOGENESIS RECEPTOR LIKE KINASE 5); ATP binding / protein kinase/ transmembrane receptor protein serine/threonine kinase	0.0655624	0.263021	0.283532	1.22213	0.767696	0.389299	0.313257	1.06523	AT2G07180	protein kinase, putative	-0.300014	-0.37847	-0.488155	-1.03873	-0.405959	0.0744626	-0.0561198	-0.210393	AT2G20180	PIL5 (PHYTOCHROME INTERACTING FACTOR 3-LIKE 5); transcription factor	0.539645	0.178469	0.261342	0.450312	0.308352	0.454635	0.267292	0.655258	AT2G18220	hypothetical protein	-0.0422775	-0.114969	-0.333296	-0.474779	-0.430887	-0.235997	0.0208636	-0.0817042
AT2G13910	pseudo	0.410366	0.303886	0.357666	0.300882	0.291121	0.321668	0.181954	0.332515	AT2G07600	pseudo	-0.55544	-0.315312	-1.16188	-1.05928	-0.339038	-0.468464	0.161802	-0.663605	AT2G20540	pentatricopeptide (PPR) repeat-containing protein	0.105596	0.151698	0.149437	0.271467	0.282979	0.119987	0.161084	0.376461	AT2G18670	zinc finger (C3HC4-type RING finger) family protein	-0.873647	-0.694579	-0.410184	-0.356507	-0.908017	-1.26307	-0.804118	-1.31046
AT2G14247	Expressed protein	1.08191	1.73524	1.64923	2.22017	0.214337	-0.579048	-0.564253	-0.80992	AT2G07680	ATMRP11 (Arabidopsis thaliana multidrug resistance-associated protein 11)	-0.149117	-0.366937	-0.658134	-0.71039	-0.222793	-0.0189805	0.070001	-0.0115913	AT2G20770	GCL2 (GCR2-LIKE 2); catalytic	0.445423	0.647002	0.640959	0.558604	0.0576734	0.400744	0.371488	0.470563	AT2G18680	hypothetical protein	-0.789939	-0.60809	-0.412062	-0.181173	-0.587029	-1.05231	-0.668091	-0.79068
AT2G14270	pseudo	0.160653	0.335748	0.492915	0.786167	0.0801209	0.0098311	0.123373	0.0959721	AT2G10440	hypothetical protein	-0.183135	-0.205222	-0.173908	-0.174422	0.717459	-0.188451	0.464745	1.1837	AT2G20820	hypothetical protein	0.243643	0.190326	0.134934	0.243181	0.168928	0.253678	0.34813	0.316059	AT2G18690	hypothetical protein	-1.05528	-0.642359	-0.498043	-0.349008	-0.399091	-0.302021	-0.260499	-0.0653635
AT2G14660	hypothetical protein	0.347869	0.167146	0.208357	0.358412	0.0812897	-0.134977	0.129254	0.094568	AT2G12650	pseudo	-1.44611	-1.41302	-1.3994	-1.4133	-1.3056	-1.39956	-1.39559	-1.36406	AT2G20835	hypothetical protein	0.845796	1.03368	1.27716	1.46685	1.05422	0.73996	1.10943	1.24558	AT2G18890	protein kinase family protein	-0.104126	-0.170993	-0.428801	-0.981099	-0.702151	-0.432003	-0.658009	-0.784352
AT2G14800	hypothetical protein	0.234893	0.281899	0.344844	0.139229	0.0658997	0.0598158	-0.0955124	0.0325517	AT2G12880	zinc knuckle (CCHC-type) family protein	-0.267033	-0.311493	-0.292281	-0.277883	-0.257496	-0.353802	-0.346041	-0.21492	AT2G20930	hypothetical protein	0.184486	0.135051	0.160607	0.230605	0.226282	0.168473	0.17565	0.124508	AT2G19110	HMA4 (Heavy metal ATPase 4); cadmium-transporting ATPase	-0.262956	-0.195144	-0.429739	-0.524923	-0.391332	-0.173964	-0.209558	-0.329661
AT2G14860	peroxisomal membrane protein 22 kDa, putative	0.248942	0.181842	0.19375	0.20844	-0.0793417	0.0551889	0.147586	0.218573	AT2G13360	AGT (ALANINE:GLYOXYLATE AMINOTRANSFERASE)	-0.109507	-0.335012	-0.304492	-0.445007	-0.151982	-0.023067	-0.145498	-0.209215	AT2G21180	hypothetical protein	0.151931	0.0550803	0.437251	0.995159	0.771739	0.620942	0.501789	1.02538	AT2G19150	pectinesterase family protein	-0.669049	-0.770759	-1.08461	-1.10837	-0.437575	-0.875943	-0.915607	-1.09831
AT2G14890	AGP9 (ARABINOGALACTAN PROTEIN 9)	0.228249	0.254833	0.0959942	0.0380129	-0.107466	-0.0747691	0.0798447	-0.0601917	AT2G13370	CHR5 (chromatin remodeling 5); ATP binding / DNA binding / chromatin binding / helicase	0.000237554	0.0496429	-0.167369	0.0138647	0.0381195	0.186796	0.423226	0.334192	AT2G21185	hypothetical protein	0.576485	0.226864	0.457287	0.493794	0.447331	0.636926	0.439798	0.449057	AT2G19470	CKL5 (Casein Kinase I-like 5); casein kinase I/ kinase	-0.0929734	-0.139804	-0.0576161	-0.0897534	-0.115008	-0.0905769	-0.125725	-0.0461526
AT2G15050	LTP; lipid binding	0.577172	0.32407	0.807842	0.994587	0.295197	0.456932	0.352453	0.130141	AT2G14095	hypothetical protein	-0.167906	-0.447989	-0.943664	-1.60185	-0.412767	-0.104894	-0.614798	-0.510953	AT2G21187	miscRNA	0.209295	0.458846	0.929736	1.96472	1.38078	1.00688	1.12065	1.6027	AT2G19480	NAP1;2/NFA2 (NUCLEOSOME ASSEMBLY PROTEIN1;2); DNA binding	-0.156132	-0.175552	-0.185034	-0.157562	-0.286612	-0.305674	-0.0924907	-0.212776
AT2G15290	ATTIC21/CIA5/PIC1/TIC21 (CHLOROPLAST IMPORT APPARATUS 5); copper uptake transmembrane transporter/ iron ion transmembrane transporter/ protein homodimerization	0.314795	0.329783	0.343552	0.356473	0.232433	-0.0932801	0.191399	0.26886	AT2G14700	hypothetical protein	-0.239801	-0.270316	-0.236959	-0.239221	-0.202342	-0.303428	-0.27548	-0.192736	AT2G21188	misc_RNA	0.565901	0.218962	0.498881	0.677648	0.621547	0.635516	0.458949	0.577844	AT2G19590	ACO1 (ACC OXIDASE 1); 1-aminocyclopropane-1-carboxylate oxidase	-0.713034	-0.52748	-1.00989	-2.1598	-0.554528	-1.04969	-1.06611	-1.71639
AT2G15430	RBP36A (RNA polymerase II 36 kDa polypeptide A); DNA binding / DNA-directed RNA polymerase	0.189601	0.163211	0.299181	0.312587	-0.0266222	-0.00932397	0.134956	0.203133	AT2G15080	disease resistance family protein	-0.0500859	-0.22694	-0.895671	-1.5469	-0.80749	0.315276	-0.280564	-0.118089	AT2G21490	LEA (DEHYDRIN LEA)	1.19049	0.969122	1.18064	3.36668	2.21613	1.70384	1.61812	2.572	AT2G19910	RNA-dependent RNA polymerase family protein	-0.296698	-0.354718	-0.282957	-0.587029	-0.577614	-0.23127	-0.355638	-0.342171
AT2G15580	zinc finger (C3HC4-type RING finger) family protein	0.330644	0.133586	0.379717	0.408776	0.391104	0.376404	0.25745	0.126095	AT2G15128	misc_RNA	-0.126738	-0.250372	-0.324584	-0.423285	-0.0759073	-0.242446	-0.0896664	-0.161203	AT2G21590	APL4 (large subunit of AGP 4); glucose-1-phosphate adenylyltransferase	0.733089	0.87345	1.61502	2.33367	0.982437	1.06036	1.6262	2.09032	AT2G20050	protein serine/threonine phosphatase	0.034197	-0.0253859	-0.0947485	-0.0744436	0.124393	0.157246	-0.0386596	0.00877443
AT2G15620	NIR1 (NITRITE REDUCTASE); ferredoxin-nitrate reductase	0.292185	0.272612	0.292045	0.22061	-0.141417	0.146877	0.0840509	0.167568	AT2G15240	UNC-50 family protein	-0.0442817	-0.156888	-0.331087	-0.625163	-0.105259	0.0198447	-0.0700083	0.0586315	AT2G21630	transport protein, putative	0.232087	0.25126	0.158725	0.261912	0.151226	0.118576	0.232566	0.19383	AT2G20300	ALE2 (ABNORMAL LEAF SHAPE 2); kinase	-0.0892878	-0.0496388	-0.15147	-0.330761	-0.442782	-0.255879	-0.230141	-0.431602
AT2G15730	hypothetical protein	0.064665	0.107068	0.130365	0.0877536	0.0806393	0.0115318	0.177183	0.157761	AT2G15500	hypothetical protein	-0.486716	-0.313293	-0.556452	-0.459527	-0.306309	-0.30221	-0.302171	-0.102462	AT2G21730	mannitol dehydrogenase, putative	0.411804	0.336149	0.152844	0.0722048	0.727549	0.436703	0.442945	0.499165	AT2G20380	kelch repeat-containing F-box family protein	-0.0427661	-0.0154254	-0.0305175	-0.0196984	0.0131713	-0.0896843	-0.0363509	0.0213373
AT2G15970	COR413-PM1 (cold regulated 413 plasma membrane 1)	0.122902	0.255553	0.564775	0.704219	0.579663	0.359894	0.604767	-0.0525891	AT2G15880	leucine-rich repeat family protein / extensin family protein	-1.41146	-0.969858	-1.09753	-0.439204	-1.02456	-0.760864	-1.94497	-1.4404	AT2G22140	hypothetical protein	0.631553	0.865682	0.616201	0.271024	0.266388	0.501595	0.471446	0.313597	AT2G20562	hypothetical protein	-0.83081	-0.284546	-0.342635	-0.379555	-0.730865	-1.00265	-0.583375	-1.64609
AT2G16060	AHB1 (ARABIDOPSIS HEMOGLOBIN 1)	0.469082	0.993053	1.06382	0.704871	0.0280008	0.00546849	0.246457	-0.4533	AT2G15890	MEE14 (maternal effect embryo arrest 14)	-0.0154527	-0.193734	-0.203747	-0.17327	0.30331	-0.125662	-0.229736	-0.292932	AT2G22370	hypothetical protein	0.159131	0.151032	0.274357	0.447667	0.192616	0.0654218	0.197357	0.20115	AT2G20670	hypothetical protein	-0.288712	-0.285553	-0.604902	-1.37662	-0.355914	-0.570552	-0.989051	-1.81814
AT2G16090	zinc finger protein-related	0.138717	0.164738	0.206681	0.156446	-0.283128	-0.157791	0.0354905	-0.0760629	AT2G15900	phox (PX) domain-containing protein	-0.140214	-0.164673	-0.259046	-0.472495	-0.232932	-0.0679983	-0.226917	-0.199921	AT2G22390	pseudo	0.269727	0.397637	0.593885	0.362426	0.16733	0.322235	0.474431	0.101266	AT2G20780	mannitol transporter, putative	-0.522519	-0.320172	-0.33867	-0.513309	-0.426224	-0.461451	-0.373321	-0.509691
AT2G16430	ATPAP10/PAP10; acid phosphatase/ protein serine/threonine phosphatase	0.0972299	0.111941	0.086147	0.161044	-0.0147027	0.0493997	0.0118709	0.176806	AT2G15910	CSL zinc finger domain-containing protein	-0.470871	-0.185764	-0.667109	-0.989963	-0.153721	-0.586276	-0.104965	-0.625415	AT2G22410	pentatricopeptide (PPR) repeat-containing protein	0.233157	0.253269	0.207318	0.479237	0.237518	0.242231	0.506437	0.906141	AT2G20900	diacylglycerol kinase, putative	-0.339453	-0.332217	-0.386026	-0.2673	-0.428442	-0.623924	-0.487287	-0.76047
AT2G16510	vacuolar ATP synthase 16 kDa proteolipid subunit 5 / V-ATPase 16 kDa proteolipid subunit 5 (AVAP5)	0.172448	0.144209	0.26882	0.506903	0.14949	0.133361	0.0658872	0.152706	AT2G15980	pentatricopeptide (PPR) repeat-containing protein	-0.205131	-0.193614	-0.397574	-0.332149	-0.0254944	-0.09602	0.0183819	0.217508	AT2G22420	peroxidase 17 (PER17) (P17)	0.19329	0.456389	1.09953	1.10111	0.66401	0.602206	0.687209	0.611896	AT2G21400	SRS3 (SHI-RELATED SEQUENCE3)	-1.12991	-0.797028	-1.106	-1.5814	-0.603283	-1.54479	-1.75251	-2.76743
AT2G16520	hypothetical protein	2.55245	1.9938	1.99816	2.60218	0.889123	2.23647	0.976624	0.365317	AT2G16010	pseudo	-0.0686841	-0.0898884	-0.111531	-0.11794	-0.131398	-0.132581	-0.131725	-0.0691235	AT2G22480	phosphofructokinase family protein	0.513891	0.501686	0.509543	0.687594	0.371328	0.463115	0.088475	0.689096	AT2G21550	bifunctional dihydrofolate reductase-thymidylate synthase, putative / DHFR-TS, putative	-0.195872	-0.0988111	-0.212592	-0.516963	-0.572029	-0.26	-0.552746	-0.241235
AT2G16630	proline-rich family protein	0.188656	0.100988	0.721098	0.844724	-0.0970699	0.145748	0.110345	0.16482	AT2G16220	F-box family protein	-0.322014	-0.378011	-0.351995	-0.339878	-0.327408	-0.428036	-0.419371	-0.268573	AT2G22500	mitochondrial substrate carrier family protein	-0.340232	0.455763	0.861882	0.742747	-0.565258	-0.222876	0.250097	-1.17578	AT2G21560	hypothetical protein	-0.725075	-0.717648	-0.966985	-1.38457	-0.688708	-0.868319	-1.09617	-1.36902
AT2G16710	hesB-like domain-containing protein	0.168479	0.243601	0.489523	0.737071	0.428228	0.214566	0.184359	0.102692	AT2G16230	glycosyl hydrolase family 17 protein	-0.387456	-0.266134	-1.56623	-2.00757	-0.613291	-0.108508	-0.00285737	-0.237658	AT2G22630	AGL17 (AGAMOUS-LIKE 17); transcription factor	0.994161	0.885977	1.13486	1.08522	0.427042	0.872147	0.697755	0.998588	AT2G21650	MEE3 (maternal effect embryo arrest 3); DNA binding / transcription factor	-1.4302	-3.98891	-4.22449	-5.27672	-5.21452	-3.36916	-4.51547	-4.67083
AT2G17130	IDH2 (ISOCITRATE DEHYDROGENASE SUBUNIT 2); isocitrate dehydrogenase (NAD+)	0.306348	0.278341	0.274725	0.339219	0.164119	0.345097	0.230028	0.253465	AT2G16470	zinc finger (CCCH-type) family protein / GYF domain-containing protein	-0.27722	-0.333176	-0.641641	-0.850179	-0.852639	-0.293409	-0.239916	-0.0993828	AT2G22670	IAA8 (indoleacetic acid-induced protein 8); transcription factor	0.249408	0.279371	0.317531	0.173007	-0.0409483	0.123619	0.131139	0.189426	AT2G21900	WRKY59 (WRKY DNA-binding protein 59); transcription factor	-2.95066	-2.05223	-2.96254	-2.52048	-3.50494	-2.20454	-3.05824	-2.34609
AT2G17150	RWP-RK domain-containing protein	0.290063	0.21142	0.154296	0.203621	0.0427417	0.148999	0.118659	0.249171	AT2G16530	3-oxo-5-alpha-steroid 4-dehydrogenase family protein / steroid 5-alpha-reductase family protein	0.0140257	0.00980888	0.105368	0.37342	0.415246	0.0539865	0.0625402	0.343242	AT2G22880	VQ motif-containing protein	0.224958	0.2491	0.843681	0.942962	0.206587	0.404112	0.294186	0.637016	AT2G22010	zinc finger (C3HC4-type RING finger) family protein	1.44941	0.102378	0.514714	-0.0414886	-0.326759	-0.292684	0.952482	-0.7881
AT2G17250	EMB2762 (EMBRYO DEFECTIVE 2762)	0.224527	0.210444	0.0473697	0.525211	0.21316	0.208993	0.414877	0.873535	AT2G16570	ATASE (GLN PHOSPHORIBOSYL PYROPHOSPHATE AMIDOTRANSFERASE 1); amidophosphoribosyltransferase	-0.286378	-0.128273	-0.316522	-0.238652	-0.19075	-0.114712	0.183106	0.27931	AT2G22905	Expressed protein	0.736163	0.861131	0.953821	0.658533	0.9221	1.04391	0.862001	0.805528	AT2G22060	hypothetical protein	-1.71175	-1.26488	-1.5892	-1.68441	-1.62176	-2.01973	-1.96411	-2.55382
AT2G17280	phosphoglycerate/bisphosphoglycerate mutase family protein	0.0904645	0.138157	0.646379	0.983446	-0.136315	-0.0232247	0.0242893	0.0584069	AT2G16980	tetracycline transporter	-0.206683	-1.00568	-1.32568	-2.28636	-0.499942	0.0205769	-0.813271	-0.643403	AT2G22910	GCN5-related N-acetyltransferase (GNAT) family protein / amino acid kinase family protein	0.0703374	0.178612	0.192991	0.214567	0.170033	0.233359	0.256207	0.50785	AT2G22125	binding	-1.25547	-0.526464	-0.5573	-0.69023	-1.00151	-1.83294	-0.748698	-2.67764
AT2G17470	hypothetical protein	0.494788	0.632153	1.36489	2.05804	0.22889	0.140297	0.714409	1.3291	AT2G17036	F-box family protein	-0.18193	-0.364886	-0.619924	-0.753021	-0.136418	0.303788	0.240946	0.37723	AT2G23000	SCPL10 (serine carboxypeptidase-like 10); serine carboxypeptidase	0.643962	0.861883	1.80587	2.28043	0.916122	0.468662	0.437733	1.07962	AT2G22250	AAT/ATAAT/MEE17 (maternal effect embryo arrest 17); aspartate transaminase	-0.246585	-0.248558	-0.322612	-0.516609	-0.34301	-0.259735	-0.334478	-0.31427
AT2G17550	hypothetical protein	0.160693	0.217215	0.158804	0.335314	0.288066	0.166611	-0.0697118	-0.0362049	AT2G17420	NTRA (NADPH-dependent thioredoxin reductase 2)	-0.236837	-0.0411419	-0.145635	-0.185775	-0.120385	-0.10228	-0.0523485	-0.176783	AT2G23010	SCPL9; serine carboxypeptidase	1.1018	1.6646	2.54177	2.39949	1.15818	0.830991	0.898346	1.23034	AT2G22300	ethylene-responsive calmodulin-binding protein, putative (SR1)	-0.206739	-0.310253	-0.275463	-0.452026	-0.0604642	-0.177487	-0.331848	-0.242359
AT2G17730	zinc finger (C3HC4-type RING finger) family protein	0.0640073	0.0247493	0.305861	0.347787	-0.373737	-0.199365	-0.166936	-0.306236	AT2G17590	DC1 domain-containing protein	-0.371086	-0.847675	-1.54592	-2.13374	-0.385937	0.101621	-0.339066	-0.595887	AT2G23030	SNRK2-9/SNRK2 (SNF1-RELATED PROTEIN KINASE 2); kinase	0.161426	0.185001	0.265859	0.266627	0.226525	0.444682	0.369948	0.614574	AT2G22400	NOL1/NOP2/sun family protein	-0.111214	-0.130799	-0.378949	-0.705971	-0.487715	-0.173395	-0.0572825	-0.260827
AT2G17780	MCA2 (MID1-COMPLEMENTING ACTIVITY 2)	0.203517	0.511382	0.464128	0.229188	-0.0626582	0.18557	0.0839371	0.161402	AT2G17720	oxidoreductase, 2OG-Fe(II) oxygenase family protein	-0.070785	-0.164466	-0.240133	-0.295743	-0.206951	-0.0567674	-0.192069	0.0169953	AT2G23120	hypothetical protein	0.78812	1.13578	1.27503	1.69233	1.18258	0.958865	0.849191	0.897818	AT2G22510	hydroxyproline-rich glycoprotein family protein	-0.314437	-0.308815	-0.185028	-0.528852	-0.528603	-0.625648	-0.861845	-1.17011
AT2G17840	ERD7 (EARLY-RESPONSIVE TO DEHYDRATION 7)	0.604383	0.404611	0.714392	0.840576	-0.0422279	0.238877	-0.098963	0.271003	AT2G17787	hypothetical protein	-0.0520462	-0.235848	-0.474256	-0.273304	0.40455	0.457742	0.204207	0.674088	AT2G23210	UDP-glycosyltransferase/ transferase, transferring glycosyl groups	1.72642	1.44353	1.72081	2.17392	2.05202	1.94841	1.49725	2.69298	AT2G22610	kinesin motor protein-related	-0.24407	-0.100691	-0.470623	-0.851877	-0.882372	-0.501697	-0.334832	-0.686597
AT2G17900	SDG37 (SET DOMAIN GROUP 37); zinc ion binding	0.243514	0.260853	0.371459	0.120937	-0.297767	-0.0735187	-0.0513242	-0.222195	AT2G17920	nucleic acid binding / zinc ion binding	-0.178	-0.00889629	-0.57951	0.0153578	-0.447233	-0.218731	-0.156609	0.887379	AT2G23340	AP2 domain-containing transcription factor, putative	0.409507	0.595456	0.846763	0.784645	-0.0145528	0.227057	0.178233	0.288088	AT2G22660	hypothetical protein	0.039726	-0.0326355	-0.192557	-0.395387	-0.0543604	0.176037	-0.0015368	0.168332
AT2G17975	zinc finger (Ran-binding) family protein	-0.341801	-0.0225633	0.0137901	0.0050543	0.0796851	0.0481005	0.117705	0.158961	AT2G17990	hypothetical protein	-0.0519458	-0.0239324	-0.121248	-0.191493	-0.0272507	0.00495687	0.00506327	0.0294506	AT2G23370	hypothetical protein	0.179655	0.178566	0.111978	0.22578	0.154622	0.155875	0.156273	0.352595	AT2G22720	hypothetical protein	-0.330526	-0.149705	-0.382594	-0.676591	-0.420634	-0.496473	-0.180364	-0.771876
AT2G18000	TAF14 (TBP-ASSOCIATED FACTOR 14)	0.372245	0.293345	0.425004	0.360171	0.0725052	0.392107	0.263629	0.551622	AT2G18160	ATBZIP2/GBF5 (G-BOX BINDING FACTOR 5); DNA binding / protein heterodimerization/ transcription factor	-0.640109	-0.773376	-0.892644	-1.3581	-0.473495	-0.537738	-0.454563	-0.862011	AT2G23820	metal-dependent phosphohydrolase HD domain-containing protein	0.310311	0.271089	0.177694	0.280057	0.253132	0.193433	0.279861	0.328275	AT2G22750	basic helix-loop-helix (bHLH) family protein	-0.71492	-1.75582	-1.15866	-1.92131	-1.01143	-0.982885	-2.05414	-1.9698
AT2G18040	PIN1AT (parvulin 1At)	0.130107	0.0754496	0.194942	0.159172	0.137075	0.0658262	0.0474624	-0.0150055	AT2G18196	metal ion binding	-0.173245	-0.271585	-0.35978	-0.291554	0.0261226	-0.10761	-0.027257	0.0349694	AT2G23985	hypothetical protein	0.253125	0.263341	0.358185	0.396667	0.26643	0.238606	0.205306	0.168354	AT2G22795	hypothetical protein	-0.130882	-0.515046	-0.428954	-0.679749	-0.104228	-0.365299	-0.4555	-0.89744
AT2G18290	anaphase-promoting complex, subunit 10 family / APC10 family	0.195027	0.120101	0.295036	0.376759	-0.00473486	-0.215218	-0.173518	-0.273735	AT2G18280	AtTLP2 (TUBBY LIKE PROTEIN 2); phosphoric diester hydrolase/ transcription factor	-0.0469909	-0.104865	-0.137333	-0.32639	-0.110974	-0.0281782	-0.175916	-0.224837	AT2G24270	ALDH11A3 (Aldehyde dehydrogenase 11A3); 3-chloroallyl aldehyde dehydrogenase/ glyceraldehyde-3-phosphate dehydrogenase (NADP+)	-0.152413	0.141271	0.385127	0.228337	-0.0350459	-0.151105	-0.0183328	-0.351332	AT2G22850	ATBZIP6 (ARABIDOPSIS THALIANA BASIC LEUCINE-ZIPPER 6); DNA binding / transcription factor	-0.60909	-0.70961	-0.775966	-1.16153	-0.47101	-0.557192	-0.691775	-0.928908
AT2G18400	ribosomal protein L6 family protein	0.156227	0.19212	0.207825	0.0518599	-0.0585246	0.0540379	0.210452	-0.0801205	AT2G18350	ATHB24 (ARABIDOPSIS THALIANA HOMEOBOX PROTEIN 24); DNA binding / transcription factor	-0.180564	-0.318237	-0.40169	-0.120276	0.19522	-0.145763	-0.241616	0.231076	AT2G24280	serine carboxypeptidase S28 family protein	0.0907794	0.176295	0.246538	0.42049	0.816392	0.774361	0.733342	0.840218	AT2G22990	SNG1 (SINAPOYLGLUCOSE 1); serine carboxypeptidase	-0.0862314	-0.260649	-0.224464	-0.632118	-0.419151	-0.644463	-1.00145	-1.18273
AT2G18470	protein kinase family protein	0.507466	1.68872	1.4147	0.565106	1.05592	0.743239	2.26171	0.523419	AT2G18360	hydrolase, alpha/beta fold family protein	-0.217623	-0.45168	-0.430726	-0.348112	0.0456546	-0.455774	-0.807189	-0.63787	AT2G24290	hypothetical protein	0.162094	0.185011	0.197624	0.28627	0.388293	0.115417	0.167844	0.133826	AT2G23050	phototropic-responsive NPH3 family protein	-0.901799	-0.616291	-1.58912	-2.09047	-0.76963	-0.551883	-0.209704	-0.872978
AT2G18490	zinc finger (C2H2 type) family protein	1.56725	1.73914	2.68459	3.19247	1.23107	1.63336	1.78001	2.36432	AT2G18500	ATOFP7/OFP7 (Arabidopsis thaliana ovate family protein 7)	-0.346967	-0.365197	-0.61246	-0.993051	-0.0472627	-0.201747	-0.120153	-0.341053	AT2G24560	carboxylesterase	0.468776	0.534384	1.00408	1.73336	0.552678	0.660289	0.600947	0.377663	AT2G23060	GCN5-related N-acetyltransferase (GNAT) family protein	-1.14969	-1.5311	-2.24907	-2.32354	-0.832824	-0.929786	-1.34202	-1.44684
AT2G18510	EMB2444 (EMBRYO DEFECTIVE 2444); RNA binding	0.257773	0.237825	0.238673	0.409994	0.100998	0.136541	0.245342	0.50813	AT2G18560	UDP-glucoronosyl/UDP-glucosyl transferase family protein	-0.104015	-0.284324	-0.501442	-0.488963	-0.0933953	0.11575	-0.0613582	-0.0316768	AT2G24680	transcriptional factor B3 family protein	0.422096	0.46736	0.206067	0.446904	0.293814	0.187419	0.257187	0.51759	AT2G23070	casein kinase II alpha chain, putative	-0.205528	-0.228904	-0.289023	-0.465788	-0.230193	-0.2589	-0.186024	-0.481298
AT2G18630	hypothetical protein	0.156024	0.132752	0.182002	0.0807335	-0.0162089	0.000355199	0.122342	0.0417867	AT2G18710	SCY1 (SECY HOMOLOG 1); P-P-bond-hydrolysis-driven protein transmembrane transporter	-0.12875	-0.205493	-0.402731	-0.254031	0.160401	-0.0365777	-0.172216	0.0752916	AT2G24720	ATGLR2 (Arabidopsis thaliana glutamate receptor 2)	0.796776	0.962424	0.99963	0.785529	0.394146	0.415355	0.285036	1.09281	AT2G23140	binding / ubiquitin-protein ligase	-0.550201	-0.401205	-0.600985	-0.623014	-0.517352	-0.497926	-0.470046	-0.666441
AT2G18770	signal recognition particle binding	0.127613	0.08856	0.109012	0.0701044	-0.0496041	0.0636597	-0.0302684	-0.0877864	AT2G18820	pseudo	-0.460086	-0.48246	-0.446107	-0.547408	-0.390192	-0.347841	-0.412167	-0.400494	AT2G24790	COL3 (CONSTANS-LIKE 3); protein binding / transcription factor/ zinc ion binding	0.269838	0.266001	0.347037	0.352588	0.102697	0.16268	0.290322	0.245592	AT2G23260	UGT84B1 (UDP-GLUCOSYL TRANSFERASE 84B1); UDP-glycosyltransferase/ abscisic acid glucosyltransferase/ indole-3-acetate beta-glucosyltransferase/ transferase, transferring glycosyl groups	-2.93078	-2.96106	-2.95941	-2.95348	-2.96591	-2.97262	-2.90432	-2.95496
AT2G18780	F-box family protein	0.0968092	0.316471	0.323233	0.458115	0.268932	0.0749383	0.23494	0.30516	AT2G18915	LKP2 (LOV KELCH PROTEIN 2); ubiquitin-protein ligase	-0.282552	-0.167174	-0.158446	-0.173217	0.0124904	-0.190098	-0.0963027	-0.472487	AT2G24850	TAT3 (TYROSINE AMINOTRANSFERASE 3); transaminase	1.86233	2.45011	4.55328	3.8959	0.696402	3.21413	1.60727	4.31856	AT2G23550	hydrolase	-0.0278981	-0.288048	-0.215779	1.04667	1.36109	0.595151	0.171869	0.632478
AT2G18950	HPT1 (HOMOGENTISATE PHYTYLTRANSFERASE 1); prenyltransferase	0.110053	0.252173	0.456653	0.43302	0.10947	-0.00719588	0.0924271	-0.0227823	AT2G19130	S-locus lectin protein kinase family protein	-0.186702	-0.282251	-0.318068	-0.560525	0.047333	0.232604	0.063635	0.464623	AT2G24940	ATMAPR2 (ARABIDOPSIS THALIANA MEMBRANE-ASSOCIATED PROGESTERONE BINDING PROTEIN 2); heme binding / transition metal ion binding	0.193091	0.274427	0.401353	0.39117	0.415583	0.148602	0.32207	0.168582	AT2G23560	hydrolase, alpha/beta fold family protein	-0.219579	-0.503522	-0.518414	-0.522269	-0.228932	-0.673545	-0.993369	-0.727067
AT2G18990	TXND9 (THIOREDOXIN DOMAIN-CONTAINING PROTEIN 9 HOMOLOG)	0.277291	0.278898	0.3339	0.192962	-0.107063	0.0146685	0.0741906	-0.0316849	AT2G19260	ELM2 domain-containing protein / PHD finger family protein	-0.0543665	-0.12396	-0.315651	-0.28721	0.0180028	0.0479188	0.0171561	0.235414	AT2G24970	hypothetical protein	0.65855	0.528122	0.496458	0.267365	0.184441	0.376589	0.289353	0.451696	AT2G23600	ACL (ACETONE-CYANOHYDRIN LYASE); hydrolase	-0.745194	-0.708338	-0.514976	-0.370774	-0.647554	-0.946452	-0.780161	-0.948718
AT2G19180	hypothetical protein	0.0998521	0.0739193	0.164875	0.313389	0.0918593	0.047524	0.100751	0.198803	AT2G19280	pentatricopeptide (PPR) repeat-containing protein	-0.172599	-0.0867412	-0.21128	-0.0862699	0.168932	0.105486	0.23229	0.373172	AT2G25270	hypothetical protein	0.494627	0.526156	0.696015	0.605675	0.116367	0.421433	0.51988	0.517646	AT2G23610	esterase, putative	-0.0729739	-0.091434	0.0942054	0.19393	0.195261	-0.0931023	-0.238282	-0.194183
AT2G19240	RabGAP/TBC domain-containing protein	0.279189	0.478479	0.753364	0.546747	-0.108406	-0.0561294	-0.0662934	0.271977	AT2G19340	hypothetical protein	0.0750233	0.030824	0.0215914	0.0609122	0.223125	0.245508	0.18657	0.311054	AT2G25470	leucine-rich repeat family protein	0.258979	1.03677	3.40697	4.03366	1.9185	3.58026	3.73516	4.39871	AT2G23630	SKS16 (SKU5 Similar 16); copper ion binding / pectinesterase	-0.581359	-0.320363	-1.2727	-1.69795	-0.510768	-0.344435	-0.147437	-0.636925
AT2G19490	recA family protein	0.249439	0.221186	0.243291	0.0748815	-0.277984	-0.00817206	0.231296	0.194114	AT2G19480	NAP1;2/NFA2 (NUCLEOSOME ASSEMBLY PROTEIN1;2); DNA binding	-0.156132	-0.175552	-0.185034	-0.157562	-0.286612	-0.305674	-0.0924907	-0.212776	AT2G25570	binding	0.197613	0.16959	0.300105	0.155529	0.182668	0.239604	0.257568	0.341629	AT2G23840	HNH endonuclease domain-containing protein	-0.278775	-0.733637	-0.736083	-1.09968	-0.288473	-0.574636	-0.952324	-0.985217
AT2G19530	hypothetical protein	0.318077	0.235062	0.361878	0.125299	0.0113661	0.15901	0.215466	0.137198	AT2G19660	DC1 domain-containing protein	-0.262725	-0.40247	-1.32327	-1.72035	-0.508248	-0.135813	-0.219913	-0.51398	AT2G25625	hypothetical protein	1.53486	0.130679	1.97717	2.8567	1.85162	3.17895	3.51352	2.44311	AT2G24130	leucine-rich repeat transmembrane protein kinase, putative	-1.36475	-1.9132	-3.71378	-4.92225	-1.67002	-0.987826	-2.00244	-3.36457
AT2G19690	phospholipase A2 beta, secretory low molecular weight	0.24108	0.121802	0.0902087	0.288623	0.171852	0.111311	-0.0971685	0.0162154	AT2G19670	protein arginine N-methyltransferase, putative	-0.130697	-0.188119	-0.318145	-0.191259	-0.325552	-0.265695	0.0464746	0.0198313	AT2G25680	MOT1 (MOLYBDATE TRANSPORTER 1); molybdate ion transmembrane transporter/ sulfate transmembrane transporter	0.909283	0.740633	0.574533	0.492123	1.27925	1.28428	1.24327	1.42929	AT2G24170	endomembrane protein 70, putative	-0.0631103	-0.0387649	-0.276276	-0.448408	-0.183503	-0.171446	-0.119947	-0.395427
AT2G19780	leucine-rich repeat family protein / extensin family protein	0.318355	0.303714	0.577751	0.421107	0.243203	0.287539	0.221639	0.123475	AT2G19803	pseudo	-1.20777	-0.63306	-1.86405	-1.87929	-0.136049	-0.846641	-0.527259	-0.675169	AT2G25690	senescence-associated protein-related	0.255239	0.596423	0.663487	0.920264	0.550048	0.32537	0.92931	0.416907	AT2G24300	calmodulin-binding protein	-0.397726	-0.266712	-1.07274	-1.4359	-0.429123	-0.378	-0.18556	-0.897229
AT2G19980	allergen V5/Tpx-1-related family protein	0.526698	0.610383	0.604583	0.384154	0.0789746	0.340826	0.67154	0.343346	AT2G19930	RNA-dependent RNA polymerase family protein	-0.24556	-0.16802	-0.427122	-0.369169	0.105894	0.133866	0.356438	0.402788	AT2G25720	hypothetical protein	0.395287	0.346796	0.369514	0.477162	0.504995	0.374112	0.366123	0.341883	AT2G24400	auxin-responsive protein, putative / small auxin up RNA (SAUR_D)	-0.322276	-0.365691	-1.37552	-2.02461	-0.677982	-0.617044	-0.682693	-1.48093
AT2G20270	glutaredoxin family protein	0.256272	0.252571	0.395738	0.315714	-0.0277382	0.00409648	-0.0379687	-0.0578214	AT2G20030	zinc finger (C3HC4-type RING finger) family protein	-0.10396	-0.264472	-0.199819	-0.272117	0.116519	-0.202561	-0.749161	0.0376668	AT2G25740	ATP-dependent protease La (LON) domain-containing protein	0.0690704	0.154179	0.174832	0.162502	0.278186	0.318782	0.278474	0.561534	AT2G24500	FZF; transcription factor	-0.170842	-0.207308	-0.196543	-0.417175	-0.432701	-0.312618	-0.15154	-0.303652
AT2G20390	hypothetical protein	0.124579	0.137116	0.270365	0.418657	0.0463993	0.0957159	0.246184	0.442332	AT2G20080	hypothetical protein	-0.929122	-2.2562	-1.69471	-1.6768	-0.961261	0.267949	-0.770914	-0.802433	AT2G25920	hypothetical protein	0.0536962	0.0755344	0.0963757	0.192196	0.113538	0.0594314	0.0798326	0.119702	AT2G24530	hypothetical protein	-0.0882198	-0.0928206	-0.304358	-0.479623	-0.273042	-0.226534	-0.277155	-0.079738
AT2G20470	kinase	0.833177	0.712461	0.867721	0.588483	0.160063	-0.0180794	0.668366	0.0452799	AT2G20260	PSAE-2 (photosystem I subunit E-2); catalytic	-0.0411031	-0.104303	-0.132011	-0.382196	-0.0924269	0.0459673	-0.0378188	-0.115127	AT2G25964	hypothetical protein	0.120319	0.140234	0.320975	0.676311	0.357813	0.316394	0.522336	0.345384	AT2G24610	ATCNGC14 (cyclic nucleotide gated channel 14); calmodulin binding / cyclic nucleotide binding / ion channel	-0.483935	-0.217347	-0.589523	-0.93329	-0.426438	-0.411114	-0.110191	-1.30438
AT2G20480	hypothetical protein	0.330774	0.287976	0.466603	0.243865	0.0519376	0.0953381	0.261208	-0.177564	AT2G20410	activating signal cointegrator-related	-0.148115	-0.232191	-0.262692	-0.32686	0.0150612	-0.102411	-0.0415169	-0.115796	AT2G26250	FDH (FIDDLEHEAD); acyltransferase	0.103903	0.228377	0.410744	0.486483	-0.134815	-0.0157543	0.00125945	0.0246376	AT2G24692	hypothetical protein	-0.49153	-0.240169	-0.310321	-0.776572	-0.436711	-0.745567	-0.313396	-1.25849
AT2G20585	NFD6 (NUCLEAR FUSION DEFECTIVE 6)	0.18206	0.184485	0.237436	0.36814	-0.094636	0.00234247	0.256577	0.155544	AT2G20440	RabGAP/TBC domain-containing protein	-1.69703	-0.525145	0.0186987	1.1667	-0.506248	-1.53739	0.0297009	-2.48933	AT2G26260	AT3BETAHSD/D2 (3BETA-HYDROXYSTEROID-DEHYDROGENASE/DECARBOXYLASE ISOFORM 2); 3-beta-hydroxy-delta5-steroid dehydrogenase/ sterol-4-alpha-carboxylate 3-dehydrogenase (decarboxylating)	0.221647	0.202966	0.118521	0.149049	0.143094	0.0625157	0.0856724	0.245578	AT2G25080	ATGPX1 (GLUTATHIONE PEROXIDASE 1); glutathione peroxidase	-0.240573	-0.415376	-0.515117	-0.683015	0.130335	-0.329187	-0.401886	-0.570241
AT2G20630	protein phosphatase 2C, putative / PP2C, putative	0.156759	0.16871	0.37237	0.356624	0.000175561	0.225366	0.130833	0.219553	AT2G20500	hypothetical protein	-0.182696	-0.286185	-0.730256	-1.40899	-0.141366	-0.115314	-0.467658	-0.54242	AT2G26390	serpin, putative / serine protease inhibitor, putative	0.521986	0.422885	0.67597	0.236433	0.344284	1.25526	0.970313	0.832742	AT2G25130	armadillo/beta-catenin repeat family protein	-0.142272	-0.308294	-0.736277	-1.28686	-0.388244	-0.113629	-0.28456	-0.44176
AT2G20690	lumazine-binding family protein	0.303541	0.126338	0.119746	0.0409125	-0.386473	-0.0198672	-0.248316	0.126707	AT2G20515	hypothetical protein	-0.377879	-0.296136	-1.1061	-1.15341	-0.100005	-0.130868	0.19369	-0.32627	AT2G26580	YAB5 (YABBY5); transcription factor	0.391768	0.183078	0.324543	0.467171	0.383222	0.520798	0.283321	0.693464	AT2G25180	ARR12 (ARABIDOPSIS RESPONSE REGULATOR 12); transcription factor/ two-component response regulator	-0.220773	-0.293572	-0.54565	-0.557171	-0.233135	-0.143152	-0.166498	-0.20901
AT2G20710	pentatricopeptide (PPR) repeat-containing protein	0.319744	0.452456	0.351037	0.541361	0.0158145	0.141048	0.409475	0.681791	AT2G20520	FLA6	-0.554332	-1.84962	-2.6378	-2.89271	0.00868948	0.0704816	-0.942562	-0.586041	AT2G26680	hypothetical protein	0.132286	0.113412	0.0778561	0.119648	0.0552545	0.0203978	0.0756661	0.0758013	AT2G25410	protein binding / zinc ion binding	-0.668945	-0.610395	-1.02741	-1.63529	-1.4417	-2.02608	-2.55448	-2.50613
AT2G20724	pseudo	0.298899	0.33701	0.2534	0.327205	0.167784	0.0179457	0.182329	-0.334693	AT2G20550	DNAJ chaperone C-terminal domain-containing protein	-0.536417	-0.625273	-0.8714	-1.36113	0.0371198	-0.38767	-0.468162	-0.544168	AT2G26690	nitrate transporter (NTP2)	0.606835	0.394862	0.522793	0.684473	0.607517	0.795483	0.434342	0.822411	AT2G25430	epsin N-terminal homology (ENTH) domain-containing protein	-0.583923	-0.294132	-0.337173	-0.721872	-0.571885	-0.50733	-0.507497	-0.858909
AT2G20760	protein binding / protein transporter/ structural molecule	0.176864	0.159631	0.0516119	0.267324	0.150231	0.150588	0.0970846	0.432323	AT2G20560	DNAJ heat shock family protein	-0.355353	-0.462996	-0.169774	-0.16777	-0.225559	0.247687	-0.0372132	0.246405	AT2G26870	phosphoesterase family protein	0.462909	0.60206	0.957344	0.986489	0.320383	0.394417	0.369354	0.599355	AT2G25530	AFG1-like ATPase family protein	-0.492944	-0.562237	-0.63769	-0.789483	-0.359081	-0.269434	-0.440248	-0.167099
AT2G20790	protein binding / protein transporter	0.219317	0.128849	0.0580718	0.358912	0.323907	0.288361	0.132014	0.640063	AT2G20720	pentatricopeptide (PPR) repeat-containing protein	-0.533538	-0.865731	-1.51382	-2.1593	-0.383339	-0.0845375	0.0841084	-0.221931	AT2G26970	exonuclease family protein	0.152621	0.0842514	0.104788	0.189292	0.107857	0.0893823	0.123003	0.141681	AT2G25735	hypothetical protein	-0.721997	-0.825954	-0.83393	-0.776975	-0.327821	-0.882014	-1.02135	-0.838595
AT2G20830	folic acid binding / transferase	0.0322603	0.113362	0.139894	0.0716289	-0.107257	-0.105475	-0.1508	-0.198716	AT2G20725	CAAX amino terminal protease family protein	0.0641898	-0.100941	0.0173273	-0.0369429	-0.387442	-0.473267	-0.793748	-0.612788	AT2G27130	protease inhibitor/seed storage/lipid transfer protein (LTP) family protein	0.472785	0.442052	0.512343	0.520088	0.336596	0.0986684	0.224253	0.122012	AT2G25780	hypothetical protein	-1.24429	-1.65577	-1.15972	-0.906009	-1.5174	-1.3666	-1.64071	-1.67232
AT2G20850	SRF1 (STRUBBELIG RECEPTOR FAMILY 1); kinase	0.432518	0.397542	0.282216	0.234611	-0.159699	0.101044	0.0368912	0.116891	AT2G20950	hypothetical protein	-0.120126	-0.355767	-0.394988	-0.342389	-0.207553	-0.215876	-0.353562	0.113982	AT2G27385	hypothetical protein	0.350009	0.223042	0.199416	0.354752	0.415551	0.237441	0.175718	0.375265	AT2G25900	ATCTH (Arabidopsis thaliana Cys3His zinc finger protein); transcription factor	-0.474692	-0.397267	-0.678296	-1.18267	-1.3402	-1.65484	-1.83579	-2.64497
AT2G20940	hypothetical protein	0.135882	0.076962	0.0808057	0.304445	0.101854	0.15243	0.312537	0.486507	AT2G21050	amino acid permease, putative	-0.042733	-0.123812	-0.577098	-0.817489	0.255281	0.024496	0.150275	0.117057	AT2G27510	ATFD3 (FERREDOXIN 3); electron carrier	0.403302	0.646064	0.825258	0.9496	0.142917	0.37566	0.454542	0.308259	AT2G26010	PDF1 (plant defensin 1)	-0.894025	-2.14993	-2.80016	-2.4528	-2.67649	-2.22808	-1.9651	-1.93169
AT2G21020	pseudo	0.0272094	0.038099	0.178421	0.412615	0.0699223	-0.344251	-0.577685	-0.171255	AT2G21850	protein binding / zinc ion binding	-0.0296299	0.00141034	-0.147614	-0.231724	-0.415977	-0.338374	-0.706788	-0.334223	AT2G27830	hypothetical protein	0.777925	0.510073	0.552915	0.632399	0.937919	0.874605	0.608343	0.475302	AT2G26020	PDF1b (plant defensin 1b)	-1.05563	-2.89095	-4.1429	-5.01134	-3.99031	-3.2605	-2.93591	-2.84715
AT2G21045	hypothetical protein	0.302015	0.329605	0.438804	0.549695	-0.024464	0.0346778	-0.0614425	0.205519	AT2G21960	hypothetical protein	-0.0251349	-0.0341418	-0.0669894	-0.127189	0.208136	0.0410293	-0.0257159	-0.0864164	AT2G28140	hypothetical protein	0.66239	1.14952	1.5944	1.56591	0.591199	0.300009	0.514767	0.410661	AT2G26040	Bet v I allergen family protein	-0.40156	-0.364893	-0.833443	-1.48153	-0.537288	-0.890411	-0.592177	-1.21725
AT2G21100	disease resistance-responsive protein-related / dirigent protein-related	0.318764	0.162991	0.491038	0.394373	0.0503594	0.0631122	-0.208445	-0.171319	AT2G22010	zinc finger (C3HC4-type RING finger) family protein	1.44941	0.102378	0.514714	-0.0414886	-0.326759	-0.292684	0.952482	-0.7881	AT2G28230	hypothetical protein	0.310518	0.26957	0.43268	0.606588	0.35583	0.18757	0.228691	0.173169	AT2G26080	ATGLDP2 (ARABIDOPSIS THALIANA GLYCINE DECARBOXYLASE P-PROTEIN 2); glycine dehydrogenase (decarboxylating)	-0.530437	-0.578522	-0.827657	-1.00331	-0.470508	-0.552695	-0.701984	-0.8068
AT2G21190	ER lumen protein retaining receptor family protein	0.087417	0.185821	0.343766	0.388882	0.0250991	0.0204715	-0.0528233	0.165479	AT2G22170	lipid-associated family protein	-0.210395	-0.314602	-0.614808	-0.494818	0.108765	-0.0764919	-0.122313	-0.182492	AT2G28400	hypothetical protein	0.703512	0.874462	1.45079	1.5599	0.560418	0.611823	0.65165	0.535544	AT2G26140	FTSH4 (FtsH protease 4); ATP-dependent peptidase/ ATPase/ metallopeptidase	-0.0376385	-0.0577713	-0.17366	-0.590703	-0.356897	-0.0595197	-0.247629	-0.186672
AT2G21195	hypothetical protein	0.194163	0.0618961	0.109039	0.443404	0.240653	0.0677219	0.219581	0.260702	AT2G22300	ethylene-responsive calmodulin-binding protein, putative (SR1)	-0.206739	-0.310253	-0.275463	-0.452026	-0.0604642	-0.177487	-0.331848	-0.242359	AT2G28500	LBD11 (LOB DOMAIN-CONTAINING PROTEIN 11)	0.509192	1.09502	1.51322	1.72639	0.597641	0.213611	0.387162	0.414244	AT2G26170	CYP711A1 (MORE AXILLARY BRANCHES 1); oxygen binding	-0.447264	-0.365421	-0.349281	-0.746861	-0.684958	-0.684331	-0.953564	-0.929123
AT2G21210	auxin-responsive protein, putative	1.03149	0.59873	0.979131	1.06698	-0.200191	0.408027	0.250252	0.495721	AT2G22590	glycosyltransferase family protein	-1.73654	-1.23213	-0.914706	-1.19083	0.592125	-0.0356482	0.031232	-0.0210524	AT2G28590	protein kinase family protein	0.262879	0.315789	0.341541	0.497481	0.202277	0.10098	0.178732	0.326835	AT2G26240	hypothetical protein	-0.18754	-0.276393	-0.323191	-0.187439	-0.0232709	-0.14772	-0.162561	-0.139541
AT2G21250	mannose 6-phosphate reductase (NADPH-dependent), putative	0.225658	0.211521	0.40756	0.202458	0.0865904	0.233977	0.0581755	0.230544	AT2G22650	FAD-dependent oxidoreductase family protein	-0.0940773	-0.137933	-0.370088	-0.309898	0.0539372	0.0608388	0.171426	0.078426	AT2G28650	ATEXO70H8 (exocyst subunit EXO70 family protein H8); protein binding	0.43837	0.509616	0.789705	1.02907	0.217521	0.178425	0.196373	0.570387	AT2G26440	pectinesterase family protein	-0.685616	-0.445542	-0.59158	-0.465754	-1.05053	-0.835215	-0.78996	-0.707578
AT2G21260	mannose 6-phosphate reductase (NADPH-dependent), putative	0.382966	0.316781	0.72397	2.41296	2.33761	1.39965	1.03273	2.49668	AT2G22660	hypothetical protein	0.039726	-0.0326355	-0.192557	-0.395387	-0.0543604	0.176037	-0.0015368	0.168332	AT2G28740	HIS4 (Histone H4)	0.317036	0.217965	0.242651	0.0813884	0.181282	0.243374	0.306112	0.293365	AT2G26480	UDP-glucoronosyl/UDP-glucosyl transferase family protein	-0.547105	-0.808768	-0.654479	-0.681722	-0.676854	-0.278955	-0.770647	-0.501075
AT2G21290	hypothetical protein	0.0416032	0.110833	-0.0416348	-0.160302	-0.274633	-0.0363001	-0.117123	-0.13251	AT2G22720	hypothetical protein	-0.330526	-0.149705	-0.382594	-0.676591	-0.420634	-0.496473	-0.180364	-0.771876	AT2G28900	OEP16 (OUTER ENVELOPE PROTEIN 16); P-P-bond-hydrolysis-driven protein transmembrane transporter	0.264941	0.19922	0.373944	0.357149	0.400467	0.354184	0.367079	0.480658	AT2G26560	PLP2 (PHOSPHOLIPASE A 2A); nutrient reservoir	-1.45925	-1.52402	-2.51589	-2.72183	-1.49321	-1.57291	-1.70189	-1.19986
AT2G21350	hypothetical protein	1.5171	0.524463	1.04965	2.32876	1.40674	0.858582	1.16494	1.89234	AT2G22920	SCPL12; serine carboxypeptidase	-0.134204	-0.398735	-0.461789	-0.176959	0.206344	0.17522	-0.0196788	0.0831479	AT2G28950	ATEXPA6 (ARABIDOPSIS THALIANA EXPANSIN A6)	0.483148	0.42001	0.416805	0.395913	0.0657763	0.37924	0.425143	0.38069	AT2G26640	beta-ketoacyl-CoA synthase, putative	-0.0484122	-0.108209	-0.368062	-0.629582	-0.434227	-0.219112	-0.296428	-0.381802
AT2G21510	DNAJ heat shock N-terminal domain-containing protein	0.759831	0.707102	0.890091	0.635637	0.287531	0.591865	0.273863	0.626404	AT2G22930	glycosyltransferase family protein	-0.401472	-0.963837	-0.686939	-0.193705	-0.352094	0.610122	0.12857	0.336614	AT2G29340	short-chain dehydrogenase/reductase (SDR) family protein	0.298297	0.431342	1.18052	1.31342	0.370018	0.938668	0.88343	1.20175	AT2G26790	pentatricopeptide (PPR) repeat-containing protein	-0.33714	-0.266827	-0.471899	-0.682866	-0.586694	-0.48325	-0.366832	-0.337512
AT2G21770	CESA9 (CELLULOSE SYNTHASE 9); transferase, transferring glycosyl groups	0.421353	0.439246	0.802622	0.724023	0.217736	0.121728	-0.0594482	0.278425	AT2G23270	hypothetical protein	-3.38095	-4.09157	-4.31556	-4.0518	-0.108741	-0.914913	0.427746	-1.4381	AT2G29450	ATGSTU5 (Arabidopsis thaliana Glutathione S-transferase (class tau) 5); glutathione transferase	0.857443	0.698046	1.18644	1.2173	0.193818	0.570833	0.288046	0.559685	AT2G26820	ATPP2-A3 (Phloem protein 2-A3); carbohydrate binding	-0.356196	-0.329099	-0.407495	-0.502745	-1.18258	-0.855495	-1.30373	-1.17012
AT2G21830	DC1 domain-containing protein	0.244174	0.0697325	0.226658	0.215218	0.0724248	0.270205	0.0975166	0.325437	AT2G23290	AtMYB70 (myb domain protein 70); DNA binding / transcription factor	-0.160708	-0.319935	-0.319264	-0.23064	0.0874606	0.176124	0.199619	0.203274	AT2G29500	17 kDa class I small heat shock protein (HSP17B-CI)	0.753776	0.725958	1.23562	1.39633	0.790037	1.60867	1.6712	2.06498	AT2G26890	GRV2 (KATAMARI2); binding / heat shock protein binding	-0.299153	0.0317135	0.00913487	0.594837	0.304542	-0.29476	0.134954	-0.48428
AT2G21870	hypothetical protein	0.192089	0.0945968	0.219845	0.174301	0.0516173	0.129713	0.209336	0.209842	AT2G23400	dehydrodolichyl diphosphate synthase, putative / DEDOL-PP synthase, putative	0.858331	1.56658	2.7811	0.832561	1.02894	-0.617938	-0.630768	0.444862	AT2G29700	ATPH1 (ARABIDOPSIS THALIANA PLECKSTRIN HOMOLOGUE 1)	0.0707103	0.0625221	0.141301	0.272821	0.295988	0.179511	0.148916	0.228631	AT2G27000	CYP705A8 (cytochrome P450, family 705, subfamily A, polypeptide 8); oxygen binding	-0.320508	-0.444385	-0.550069	-0.451822	-0.434882	-0.246397	-0.528405	-0.143639
AT2G22200	AP2 domain-containing transcription factor	1.11317	0.751473	1.08996	1.04653	0.200434	0.829835	0.60508	1.20803	AT2G23410	ACPT (ARABIDOPSIS CIS-PRENYLTRANSFERASE); dehydrodolichyl diphosphate synthase	-0.6389	-0.814919	-1.7587	-2.11094	-1.31947	-0.339324	-0.722241	-1.57112	AT2G29950	ELF4-L1 (ELF4-LIKE 1)	0.371062	0.303958	0.492343	0.440278	0.889216	0.637789	0.573344	0.665423	AT2G27060	ATP binding / protein serine/threonine kinase	0.107997	-0.0489719	-0.178226	-0.357711	-0.0897167	0.142244	-0.0209385	0.0780644
AT2G22425	signal peptidase	0.268648	0.251844	0.320515	0.456602	0.203832	0.153409	0.143696	0.270247	AT2G23540	GDSL-motif lipase/hydrolase family protein	-0.080781	-0.191821	-0.214905	-0.107448	0.424386	0.0338323	-0.357323	0.0669505	AT2G30330	GCN5L1 family protein	0.148866	0.124916	0.244396	0.385763	0.343152	0.262206	0.235779	0.373975	AT2G27180	hypothetical protein	-0.277309	-0.300491	-0.194527	-0.515318	-0.349603	-0.44993	-0.425094	-0.370262
AT2G22480	phosphofructokinase family protein	0.513891	0.501686	0.509543	0.687594	0.371328	0.463115	0.088475	0.689096	AT2G23790	hypothetical protein	-0.273387	-0.326696	-0.495001	-0.496078	-0.041724	-0.0628837	0.12626	-0.05566	AT2G30530	hypothetical protein	0.288664	0.225609	0.314235	0.533003	0.216649	0.339958	0.244536	0.467689	AT2G27210	kelch repeat-containing serine/threonine phosphoesterase family protein	-0.359162	-0.0826635	-0.154473	-0.346218	-0.684449	-0.615853	-0.373717	-0.95283
AT2G22630	AGL17 (AGAMOUS-LIKE 17); transcription factor	0.994161	0.885977	1.13486	1.08522	0.427042	0.872147	0.697755	0.998588	AT2G24070	hypothetical protein	-0.177973	-0.262971	-0.732999	-1.38234	-0.143128	-0.0392199	0.0302877	-0.194692	AT2G30575	GAUT5/LGT5 (Galacturonosyltransferase 5); polygalacturonate 4-alpha-galacturonosyltransferase/ transferase, transferring glycosyl groups	0.167825	0.165187	0.0648496	0.0752258	0.248049	0.0691506	0.0659844	0.190289	AT2G27395	pseudo	-0.902039	-1.64773	-1.44654	-1.55602	-1.24782	-0.710032	-1.28631	-1.14116
AT2G22640	BRK1/HSPC300 (BRICK1)	0.214683	0.156044	0.208675	0.23381	0.341517	0.117508	-0.0470076	-0.0206409	AT2G24110	pseudo	-0.186632	-0.249943	-0.554153	-0.540789	-0.0169785	-0.00742781	0.320448	0.222541	AT2G30790	PSBP-2 (photosystem II subunit P-2); calcium ion binding	0.902341	0.856355	0.89385	1.05336	1.39251	1.02495	0.751545	0.983221	AT2G27420	cysteine proteinase, putative	-0.882404	-1.62833	-1.53558	-1.52218	-0.988745	-0.650144	-1.2081	-0.749075
AT2G22670	IAA8 (indoleacetic acid-induced protein 8); transcription factor	0.249408	0.279371	0.317531	0.173007	-0.0409483	0.123619	0.131139	0.189426	AT2G24190	short-chain dehydrogenase/reductase (SDR) family protein	-0.372841	-0.259329	-0.230186	0.0981993	0.362661	-0.0487268	-0.0884926	0.239301	AT2G30860	ATGSTF9 (Arabidopsis thaliana Glutathione S-transferase (class phi) 9); glutathione transferase	0.303286	0.257393	0.419323	0.368873	0.361271	0.36774	0.474748	0.563255	AT2G27600	SKD1/VPS4; ATP binding	-0.120837	-0.224417	-0.174463	-0.554674	-0.408258	-0.27908	-0.496398	-0.500052
[truncated: 1,746 more rows]
