# Supplementary material for: Salt-Specific Gene Expression Reveals Elevated Auxin Levels in Arabidopsis thaliana Plants Grown Under Saline Conditions
Source: Front Plant Sci. 2022 Feb 10;13:804716. doi: 10.3389/fpls.2022.804716 (PMC8866861; doi:10.3389/fpls.2022.804716)
Supplement: Supplementary file 3 [file Table_2.XLSX]

## Sheet: Supp. table 2
Table 2: The salt-specific and osmotic gene lists after filtering for genes whose expression increased or decreased by two-fold or more in at least one NaCl or sorbitol concentration																				*Lists presented as Arabidopsis gene accession numbers accoring to TAIR (https://www.arabidopsis.org/)
Salt-specific gene list (962)										Osmotic gene list (1879)										*The number in brackets represents the number of genes in each list
Gene_ID	Gene name/description	50 NaCl log2FC	75 NaCl log2FC	100 NaCl log2FC	125 NaCl log2FC	100 sorb log2FC	150 Sorb log2FC	200 Sorb log2FC	250 Sorb log2FC	Gene_ID	Gene name/description	50 NaCl log2FC	75 NaCl log2FC	100 NaCl log2FC	125 NaCl log2FC	100 sorb log2FC	150 Sorb log2FC	200 Sorb log2FC	250 Sorb log2FC	* Log2 Fold change calculated relative to expression in the untreated control
AT1G01110	IQD18 (IQ-domain 18)	-0.106737	-0.109592	-0.626307	-1.14009	-0.280417	-0.0993918	0.114174	0.15788	AT1G01070	nodulin MtN21 family protein	0.934597	0.630039	1.10551	1.03671	0.118966	0.612142	0.262033	0.36684
AT1G01453	hypothetical protein	-0.179814	-0.998844	-1.66985	-2.4192	-0.579337	0.280414	-0.77278	-0.574825	AT1G01250	AP2 domain-containing transcription factor, putative	1.11703	0.865392	1.41393	1.34792	1.64673	2.05555	1.939	2.49958
AT1G01560	ATMPK11 (Arabidopsis thaliana MAP kinase 11); MAP kinase/ kinase	0.272051	1.07221	1.0995	0.670256	-0.18398	0.578948	0.454625	0.201072	AT1G01340	ATCNGC10 (CYCLIC NUCLEOTIDE GATED CHANNEL 10); calmodulin binding / cyclic nucleotide binding / ion channel	-0.855357	-1.02969	-1.41039	-2.01644	-1.48624	-1.2363	-1.73201	-1.51627
AT1G02335	GL22 (GERMIN-LIKE PROTEIN SUBFAMILY 2 MEMBER 2 PRECURSOR.); manganese ion binding / metal ion binding / nutrient reservoir	-0.174557	-0.240794	-0.781443	-1.18911	0.28284	0.244316	0.128888	0.0567745	AT1G01390	UDP-glucoronosyl/UDP-glucosyl transferase family protein	-0.583841	-0.994676	-2.13479	-3.01482	-0.371158	-0.314714	-0.820006	-0.683182
AT1G02570	hypothetical protein	-0.0477811	-0.875933	-1.64105	-2.43667	-0.028572	0.258436	-0.555128	-0.389197	AT1G01420	UDP-glucoronosyl/UDP-glucosyl transferase family protein	0.402402	0.128129	0.283848	0.320416	0.448525	0.80447	0.610909	1.07235
AT1G02950	ATGSTF4 (GLUTATHIONE S-TRANSFERASE 31); glutathione transferase	-0.16355	-0.359846	-0.824342	-1.32151	0.115616	0.0571966	-0.222953	-0.288753	AT1G01470	LEA14 (LATE EMBRYOGENESIS ABUNDANT 14)	0.424369	0.300486	0.576195	0.91735	1.1116	0.938568	0.87583	0.875821
AT1G03070	glutamate binding /	-0.361414	-0.37724	-0.571365	-1.02424	0.186509	0.319773	0.0985397	0.0786776	AT1G01480	ACS2 (1-Amino-cyclopropane-1-carboxylate synthase 2)	-0.23963	-1.01063	-0.384057	-0.251504	-1.00123	-0.554962	-1.11432	-1.08104
AT1G03580	pseudo	-1.27458	-1.73711	-1.79402	-1.64379	0.581961	-0.552737	-0.564542	-1.09672	AT1G01620	PIP1C (PLASMA MEMBRANE INTRINSIC PROTEIN 1;3); water channel	-0.229083	-0.296909	-0.603305	-1.11619	-0.228267	-0.15748	-0.349253	-0.661606
AT1G03840	MGP (MAGPIE); nucleic acid binding / protein binding / transcription factor/ zinc ion binding	-0.848585	-0.767277	-1.24073	-0.693543	-0.267325	-0.279477	-0.0927412	-0.12544	AT1G01640	speckle-type POZ protein-related	-0.466392	-0.344245	-0.326273	-0.62982	-0.245978	-0.495487	-0.466619	-0.696533
AT1G04150	C2 domain-containing protein	-0.17015	-0.248388	-1.04379	-1.36993	-0.229588	0.178498	0.344874	0.0177629	AT1G01680	U-box domain-containing protein	0.627592	1.20159	1.2351	0.774866	0.435434	1.89769	0.710629	0.997009
AT1G05180	AXR1 (AUXIN RESISTANT 1); small protein activating enzyme	0.0114047	-0.000182588	0.105118	0.100914	0.0613917	-0.0029631	0.069431	0.208256	AT1G01720	ATAF1 (Arabidopsis NAC domain containing protein 2); transcription factor	0.460832	0.407204	0.891275	0.981855	-0.142522	0.382277	0.24371	0.592761
AT1G05250	peroxidase, putative	-0.580081	-0.718353	-1.6757	-1.99556	0.0220198	-0.669285	-1.01332	-1.49084	AT1G01750	actin-depolymerizing factor, putative	-0.218864	-0.622414	-1.05081	-1.48372	-0.553996	-0.2214	-0.674236	-0.939034
AT1G05300	ZIP5 (ZINC TRANSPORTER 5 PRECURSOR); cation transmembrane transporter	-0.411005	-0.759757	-1.40142	-1.02069	0.124639	-0.81972	-0.956438	-1.25404	AT1G02065	SPL8 (SQUAMOSA PROMOTER BINDING PROTEIN-LIKE 8); DNA binding	-0.271939	-0.418731	-0.487155	-1.06364	-0.674246	-0.614034	-0.774195	-0.890427
AT1G06160	ethylene-responsive factor, putative	-0.525674	-0.771465	-1.50348	-1.56337	-0.206347	-0.343075	-0.351086	0.165679	AT1G02205	CER1 (ECERIFERUM 1)	1.17361	2.18853	3.33448	3.9707	1.74401	1.63742	1.90902	2.4605
AT1G06360	fatty acid desaturase family protein	0.227198	0.821433	1.06371	1.48464	0.78072	-0.0453958	0.752798	0.517755	AT1G02230	ANAC004 (Arabidopsis NAC domain containing protein 4); transcription factor	1.25514	1.19947	1.67582	2.09937	0.198348	1.48052	1.38531	2.24535
AT1G07725	ATEXO70H6 (exocyst subunit EXO70 family protein H6); protein binding	0.812669	1.20341	1.44518	0.959442	0.783006	1.81949	1.27984	1.56942	AT1G02390	ATGPAT2/GPAT2 (GLYCEROL-3-PHOSPHATE ACYLTRANSFERASE 2); acyltransferase	0.164857	0.901795	1.27862	1.15364	0.188595	0.310596	0.460054	0.124401
AT1G08100	ATNRT2 (Arabidopsis thaliana high-affinity nitrate transporter 2); nitrate transmembrane transporter	2.32166	2.35411	3.11302	2.7792	-0.711601	1.47311	0.144867	1.78383	AT1G02400	ATGA2OX6/DTA1 (GIBBERELLIN 2-OXIDASE 6); gibberellin 2-beta-dioxygenase	0.644226	0.916657	1.31585	1.36147	0.493599	0.360025	0.564865	0.148396
AT1G08440	hypothetical protein	1.16381	0.795446	1.16924	1.3051	0.63238	1.20332	0.825137	0.692428	AT1G02405	proline-rich family protein	1.01991	0.740773	1.89588	2.27475	1.01172	1.65356	1.35289	1.85653
AT1G08860	BON3 (BONZAI 3)	0.41475	0.805644	1.0516	0.494279	-0.00257382	0.411251	0.165283	0.0553641	AT1G02520	PGP11 (P-GLYCOPROTEIN 11); ATPase, coupled to transmembrane movement of substances	-0.612245	-0.493165	-0.629524	-0.58398	-0.998421	-0.95341	-1.13533	-1.3253
AT1G09070	(AT)SRC2/SRC2 (SOYBEAN GENE REGULATED BY COLD-2); protein binding	0.545288	1.06543	1.3609	1.46198	-0.0939446	-0.228484	-0.30346	-0.33021	AT1G02630	equilibrative nucleoside transporter, putative (ENT8)	-0.294919	-0.641111	-0.989516	-1.70923	-0.508958	-1.19138	-1.79116	-2.16816
AT1G09350	ATGOLS3 (ARABIDOPSIS THALIANA GALACTINOL SYNTHASE 3); transferase, transferring glycosyl groups / transferase, transferring hexosyl groups	1.64794	0.20468	0.85675	1.41598	-0.777147	-0.399071	-1.17976	-0.703854	AT1G02850	glycosyl hydrolase family 1 protein	0.592982	1.13435	2.5005	3.24312	1.17755	1.20022	1.70935	2.3265
AT1G09420	G6PD4 (GLUCOSE-6-PHOSPHATE DEHYDROGENASE 4); glucose-6-phosphate dehydrogenase	-0.488472	-0.694821	-1.36776	-1.49322	0.327152	0.633265	0.857619	1.01648	AT1G02940	ATGSTF5 (Arabidopsis thaliana Glutathione S-transferase (class phi) 5); glutathione transferase	0.7822	1.49317	3.31833	4.24092	0.766802	0.934368	1.51864	2.57107
AT1G09460	glucan endo-1,3-beta-glucosidase-related	-0.630424	-0.78832	-0.848693	-1.14783	-0.585898	-0.179609	-0.0921417	-0.151862	AT1G03010	phototropic-responsive NPH3 family protein	-0.64849	-0.995382	-2.00669	-2.25497	-0.213859	-0.377211	-0.971742	-0.979307
AT1G09930	ATOPT2 (oligopeptide transporter 2); oligopeptide transporter	-0.637185	-0.385567	-0.307249	1.94911	1.44284	0.921611	0.344981	1.61481	AT1G03020	glutaredoxin family protein	-0.700557	-0.964155	-1.40597	-2.65613	-0.204361	-0.565712	-1.17079	-1.83326
AT1G10070	ATBCAT-2; branched-chain-amino-acid transaminase/ catalytic	-1.03394	-1.49118	-1.42012	-1.22647	-0.332522	-0.632482	-0.00236992	-0.158072	AT1G03170	hypothetical protein	-1.26704	-1.06886	-1.67451	-1.84154	-0.948607	-1.9808	-2.00926	-2.46969
AT1G10140	hypothetical protein	-0.444819	-0.652123	-1.03258	-1.42032	0.0632594	-0.174949	-0.503651	-0.6709	AT1G03340	hypothetical protein	0.505198	0.40474	0.683149	0.835057	0.167702	0.443747	0.452552	0.602219
AT1G10300	GTP-binding protein-related	-1.24166	-0.765354	-1.37991	-1.41265	-0.0898807	-0.806314	-0.221412	-0.737862	AT1G03457	RNA-binding protein, putative	-0.546384	-0.141673	-0.434882	-1.32985	-1.02178	-0.359097	-0.321844	-0.95698
AT1G10380	hypothetical protein	-0.0699275	-0.122711	-0.613371	-0.667277	0.412854	0.292806	-0.052268	-0.0292859	AT1G03495	transferase	1.66506	2.28775	3.61108	4.19484	1.95346	2.00506	2.88869	3.94268
AT1G10460	GLP7 (GERMIN-LIKE PROTEIN 7); manganese ion binding / metal ion binding / nutrient reservoir	-0.340843	-0.379555	-0.85666	-1.37978	-0.262142	-0.141155	-0.139332	-0.351438	AT1G03820	hypothetical protein	1.63459	1.77297	1.687	1.29974	0.876385	0.961352	1.68446	1.80566
AT1G10538	pseudo	-3.34513	-3.31735	-3.29998	-3.29181	-2.28061	-3.33145	-3.31831	-1.09429	AT1G03850	glutaredoxin family protein	-0.588678	-0.811046	-1.00557	-1.41303	-0.606674	-0.308867	-0.861842	-0.823892
AT1G10560	armadillo/beta-catenin repeat family protein / U-box domain-containing protein	-0.265353	-0.256901	-0.917936	-1.27208	-0.249534	0.265512	0.271541	-0.000397067	AT1G03940	transferase family protein	1.72199	2.34711	3.56486	4.17675	1.88064	2.16227	3.03304	3.99931
AT1G10750	hypothetical protein	-0.184345	-0.137235	-0.699373	-1.03771	-0.132852	-0.0250287	0.0642507	-0.24933	AT1G04180	flavin-containing monooxygenase family protein / FMO family protein	-0.352766	-0.291835	-0.805174	-1.36233	-0.453538	-0.834036	-0.837126	-1.73
AT1G10970	ZIP4 (ZINC TRANSPORTER 4 PRECURSOR); cation transmembrane transporter	-0.187638	-0.439526	-1.30832	-1.14355	0.312592	-1.02781	-1.16886	-1.06353	AT1G04560	AWPM-19-like membrane family protein	2.5243	2.73132	1.96208	5.49082	1.54424	1.85672	3.79305	4.02751
AT1G11803	pseudo	1.5477	1.46551	1.48145	1.90156	0.330044	0.448041	0.0135866	0.14833	AT1G05420	ATOFP12/OFP12 (Arabidopsis thaliana ovate family protein 12)	0.0741424	0.192653	0.325007	0.497622	0.454681	0.826618	0.973487	1.10726
AT1G11960	early-responsive to dehydration protein-related / ERD protein-related	1.00931	1.10527	1.27922	1.49768	0.254687	0.243066	0.0266052	0.359397	AT1G05560	UGT1 (UDP-glucosyl transferase 75B1); UDP-glycosyltransferase/ transferase, transferring glycosyl groups	-0.455119	-0.665778	-0.59552	-0.332918	-0.71233	-0.833509	-0.768654	-0.321077
AT1G12070	Rho GDP-dissociation inhibitor family protein	-0.499864	-0.563372	-1.41702	-1.84731	0.024478	-0.274495	-0.197008	-0.48515	AT1G05575	hypothetical protein	-0.49976	-0.707133	-0.799355	-1.16874	-0.543329	-0.373197	-0.52601	-0.720561
AT1G12080	hypothetical protein	-0.919118	-1.16596	-1.29987	-1.70734	-0.190793	-0.49613	-0.338182	-1.36067	AT1G05680	UDP-glucoronosyl/UDP-glucosyl transferase family protein	-2.02271	-1.86425	-1.07577	-0.269258	-1.25218	-1.15259	-1.13703	-0.391272
AT1G12150	hypothetical protein	-0.143443	-0.708604	-1.12125	-2.05942	-0.848935	-0.122508	-0.92117	-0.934642	AT1G05710	ethylene-responsive protein, putative	0.470423	0.752911	1.01892	1.14287	0.549172	0.476822	0.775718	0.81412
AT1G12411	hypothetical protein	-0.967901	-0.779498	-1.28982	-0.371691	0.974122	0.24184	-0.217904	0.771638	AT1G05810	ARA/Ara-1/AtRABA5e/AtRab11D (Arabidopsis Rab GTPase homolog A5e); GTP binding	-0.275718	-0.506269	-0.498438	-0.864694	-0.440684	-0.34788	-0.702925	-1.15673
AT1G12672	pseudo	2.07873	1.92672	2.58643	2.55294	1.81713	2.15138	1.54867	2.30668	AT1G05990	calcium-binding protein, putative	-0.521176	-1.07445	-1.64083	-2.36785	-0.672174	-0.200191	-1.33967	-1.21922
AT1G12805	nucleotide binding	-0.589084	-0.767732	-1.44149	-2.45791	0.00171884	-0.220519	0.361799	-0.684902	AT1G06080	ADS1 (DELTA 9 DESATURASE 1); oxidoreductase	0.670799	0.776301	0.501102	0.275069	0.478525	0.808693	0.774629	1.02803
AT1G12980	ESR1 (ENHANCER OF SHOOT REGENERATION 1); DNA binding / transcription factor	2.19957	2.51315	2.69686	2.8317	1.42187	2.38852	2.89571	2.88975	AT1G06350	fatty acid desaturase family protein	0.766879	1.11568	2.4274	3.22651	1.9222	1.63032	1.83353	2.44546
AT1G13400	JGL/NUB (NUBBIN); nucleic acid binding / zinc ion binding	0.629204	0.948771	1.09016	1.14284	-0.0602751	0.536332	1.04521	0.893858	AT1G06540	hypothetical protein	-1.55042	-1.04455	-1.1665	-0.879172	-0.272736	-0.87374	-0.253102	-0.7611
AT1G13420	sulfotransferase family protein	-0.683983	-2.29564	-1.82745	-0.762922	-0.898191	0.260926	-0.725565	-0.160464	AT1G06830	glutaredoxin family protein	-0.580831	-1.19575	-1.17799	-1.11817	-2.08753	-1.66449	-2.31519	-2.32242
AT1G13620	hypothetical protein	-0.134589	-0.22678	-0.688158	-1.32642	-0.0348426	-0.34695	-0.191084	-1.00155	AT1G06930	hypothetical protein	-1.59408	-1.21601	-2.16873	-2.24228	-0.691674	-1.2241	-0.428622	-2.45236
AT1G13650	hypothetical protein	-1.09883	-0.984308	-1.51769	-2.75613	0.11889	-0.642602	-0.726479	-1.35543	AT1G07010	calcineurin-like phosphoesterase family protein	0.521454	0.39341	0.936572	1.44971	0.8446	0.603219	0.528506	1.02238
AT1G13670	hypothetical protein	-0.563396	-0.828032	-1.40803	-1.5645	0.0164034	-0.596569	-0.990571	-0.843025	AT1G07080	gamma interferon responsive lysosomal thiol reductase family protein / GILT family protein	0.492764	0.571612	0.848124	1.13682	0.687712	0.521316	0.443399	0.937937
AT1G13700	glucosamine/galactosamine-6-phosphate isomerase family protein	0.615697	0.732426	0.961466	1.05368	0.419959	0.302247	0.127376	0.0894596	AT1G07180	ATNDI1/NDA1 (ALTERNATIVE NAD(P)H DEHYDROGENASE 1); NADH dehydrogenase	-0.328741	-0.70124	-0.89693	-1.11951	-0.302832	-0.859704	-0.973797	-0.725359
AT1G14100	FUT8 (FUCOSYLTRANSFERASE 8); galactoside 2-alpha-L-fucosyltransferase	0.742517	1.0354	1.32178	1.21119	0.0946515	-0.084618	-0.139209	-0.279439	AT1G07260	UDP-glucoronosyl/UDP-glucosyl transferase family protein	-0.300778	-0.228654	-0.818657	-1.29582	-0.430158	-0.618191	-0.668883	-0.664644
AT1G14220	ribonuclease T2 family protein	-0.465193	-0.984693	-1.70225	-1.85541	-0.541979	-0.0052239	-0.383418	-0.637311	AT1G07400	17 kDa class I heat shock protein (HSP17-CI)	0.485558	0.67001	0.637859	1.07694	0.262083	0.711688	0.598139	1.26854
AT1G14250	nucleoside phosphatase family protein / GDA1/CD39 family protein	0.347958	0.783707	1.20479	0.337561	-0.222283	0.225778	0.0370682	0.101965	AT1G07430	protein phosphatase 2C, putative / PP2C, putative	3.38877	3.16608	3.60053	4.31167	3.73796	4.11394	4.04444	4.46187
AT1G14260	zinc finger (C3HC4-type RING finger) family protein	-0.739458	-0.32318	-0.54539	-0.410458	-0.204032	-1.09229	-0.150345	-1.3423	AT1G07610	MT1C (metallothionein 1C)	0.679643	0.9295	0.95687	1.08963	0.709393	0.561718	0.568729	0.572824
AT1G14730	hypothetical protein	-0.335215	-0.326694	-0.650388	-1.03543	0.468433	0.0802205	-0.00463729	-0.390962	AT1G07640	OBP2 (OBF BINDING PROTEIN 2); DNA binding	-0.431936	-0.396632	-0.764257	-0.914399	-0.248254	-0.464732	-0.555488	-0.93565
AT1G14960	major latex protein-related / MLP-related	-1.37675	-3.83603	-1.56713	-0.739647	-0.19115	1.23617	0.464757	0.854257	AT1G07680	hypothetical protein	-2.08878	-2.46322	-4.26549	-4.44694	-3.01959	-4.16678	-4.45607	-4.4572
AT1G15330	CBS domain-containing protein	0.38563	-0.442171	-0.33784	-0.0637417	1.01652	1.63753	1.75658	1.15437	AT1G07710	ankyrin repeat family protein	-0.510898	-0.546652	-0.900653	-1.42915	-0.798423	-0.952577	-0.97895	-1.22014
AT1G15540	oxidoreductase, 2OG-Fe(II) oxygenase family protein	1.30309	1.64094	1.77183	1.26591	-0.299844	0.862327	0.577835	0.646771	AT1G07900	LBD1 (LOB DOMAIN-CONTAINING PROTEIN 1)	0.746508	0.876695	1.05381	0.896892	0.875682	0.71252	0.354732	0.589916
AT1G15960	NRAMP6 (NRAMP metal ion transporter 6); metal ion transmembrane transporter	-0.248955	-0.423857	-1.04665	-1.19427	0.00677825	-0.264775	-0.344676	-0.378589	AT1G07985	Expressed protein	0.590675	0.633297	1.1642	1.22409	1.31364	1.64452	1.96231	2.22373
AT1G16440	protein kinase, putative	-0.299546	-0.0501685	-1.48733	-2.05654	-0.0798996	0.396495	-0.587729	-0.207846	AT1G08080	carbonic anhydrase family protein	2.45338	2.15831	3.40825	3.05671	3.25033	2.72603	2.58569	3.25697
AT1G16910	hypothetical protein	-1.10582	-1.57033	-2.00587	-2.02218	-0.871245	-0.666431	-0.78878	-1.87118	AT1G08420	kelch repeat-containing protein / serine/threonine phosphoesterase family protein	-0.93626	-0.391346	-0.403935	-0.673831	-0.652448	-1.08211	-0.358041	-1.10659
AT1G17400	hypothetical protein	-0.249153	-0.668851	-0.778467	-1.46061	-0.62574	0.0230005	-0.406392	-0.270412	AT1G08430	ALMT1/ATALMT1 (AL-ACTIVATED MALATE TRANSPORTER 1); malate transmembrane transporter/	0.939324	1.35591	1.39192	1.45848	0.894879	2.50412	2.95693	4.86684
AT1G17420	LOX3 (Lipoxygenase 3); iron ion binding / lipoxygenase/ metal ion binding / oxidoreductase, acting on single donors with incorporation of molecular oxygen, incorporation of two atoms of oxygen	-0.53786	-0.842874	-0.404673	-0.66543	-0.593901	-0.538189	-0.690149	-0.554023	AT1G08890	sugar transporter family protein	0.174953	0.259407	0.544254	0.673602	0.461664	0.193316	0.384514	-0.0212682
AT1G17615	disease resistance protein (TIR-NBS class), putative	0.807034	1.62968	2.19926	1.28369	-0.0844716	1.52547	0.50143	0.770926	AT1G09180	ATSAR1/ATSARA1A (ARABIDOPSIS THALIANA SECRETION-ASSOCIATED RAS SUPER FAMILY 1); GTP binding	0.695705	0.591696	1.06734	2.1133	1.80468	1.25888	1.12675	1.74362
AT1G18460	lipase family protein	-0.198527	-0.511145	-0.627151	-1.04478	-0.42259	0.047571	-0.522722	-0.015153	AT1G09240	nicotianamine synthase, putative	-1.76234	-1.90248	-2.49355	-3.18484	-2.23792	-2.43374	-2.5999	-2.89996
AT1G18490	hypothetical protein	0.2706	0.12413	0.169848	0.0189346	0.173797	0.177048	0.0784687	0.0500573	AT1G09530	PAP3/PIF3/POC1 (PHYTOCHROME INTERACTING FACTOR 3); DNA binding / protein binding / transcription factor/ transcription regulator	0.330245	0.103838	0.179075	-0.0400804	0.77506	1.09537	0.455972	1.51326
AT1G18830	transducin family protein / WD-40 repeat family protein	-0.143849	-0.370453	-0.727831	-1.20808	1.42739	0.425316	0.193168	-0.217871	AT1G10155	ATPP2-A10 (Phloem protein 2-A10)	-0.555407	-1.09716	-1.55511	-1.60744	-1.48376	-1.34562	-1.65174	-1.9919
AT1G18960	myb family transcription factor	-0.334635	-0.786838	-1.06339	-1.44211	-0.160958	0.418965	-0.0236459	0.0443974	AT1G10340	ankyrin repeat family protein	0.589387	0.746461	0.744997	0.810164	0.498984	1.35151	0.588237	1.21958
AT1G19350	BES1 (BRI1-EMS-SUPPRESSOR 1)	0.858342	1.19429	1.29977	1.3029	0.410105	0.631273	0.402595	0.258887	AT1G10400	UDP-glycosyltransferase/ transferase, transferring glycosyl groups	-0.664608	-0.521927	-1.80623	-2.49923	-0.613951	-0.512059	-0.359708	-0.629668
AT1G19510	myb family transcription factor	-0.605228	-0.705208	-1.15674	-1.57072	0.051407	-0.873482	-1.11111	-1.45739	AT1G10588	hypothetical protein	1.09356	1.40012	1.12428	2.10048	2.34404	2.29151	1.64777	2.19853
AT1G19530	hypothetical protein	-0.207557	-0.137667	-1.08682	-1.98988	0.479822	-0.148077	-0.634025	-1.11409	AT1G10770	invertase/pectin methylesterase inhibitor family protein	-1.44843	-1.57254	-1.69887	-1.7927	-0.212281	-1.71312	-1.624	-1.96376
AT1G19640	JMT (JASMONIC ACID CARBOXYL METHYLTRANSFERASE); jasmonate O-methyltransferase	0.906608	1.30568	1.30364	0.881637	0.502573	0.509571	0.588133	0.949202	AT1G10980	hypothetical protein	-1.69371	-1.99176	-1.93459	-2.67496	-1.40848	-2.21293	-2.45408	-2.89785
AT1G19670	ATCLH1 (CORONATINE-INDUCED PROTEIN 1)	0.938603	0.490742	1.87891	1.96547	-0.316703	0.0823222	0.0877165	0.540731	AT1G10990	hypothetical protein	-0.95443	-1.08525	-1.5726	-2.02416	-0.72932	-0.781589	-0.636592	-1.03852
AT1G19780	ATCNGC8 (CYCLIC NUCLEOTIDE GATED CHANNEL 8); calmodulin binding / cyclic nucleotide binding / ion channel	2.24856	2.17403	1.7855	1.53158	-0.278828	1.83336	1.55496	1.34586	AT1G11070	hydroxyproline-rich glycoprotein family protein	-0.294279	-0.854807	-1.70257	-2.23136	-0.517147	-0.806141	-1.2353	-1.09683
AT1G20130	lipase	0.607352	0.24614	0.404097	2.19311	1.64334	1.08966	0.740204	1.80352	AT1G11080	SCPL31 (serine carboxypeptidase-like 31); serine carboxypeptidase	-0.273733	-0.606919	-1.21138	-2.05176	-1.09978	-0.718892	-1.25741	-1.89613
AT1G20190	ATEXPA11 (ARABIDOPSIS THALIANA EXPANSIN A11)	0.342969	0.88477	1.50876	2.37203	0.271551	-0.439831	0.504743	-1.27611	AT1G11185	misc_RNA	-0.174138	-0.138181	-0.725074	-1.10416	-0.355772	-0.565449	-0.850655	-0.694238
AT1G20350	ATTIM17-1 (Arabidopsis thaliana translocase inner membrane subunit 17-1); P-P-bond-hydrolysis-driven protein transmembrane transporter	0.179024	1.21676	2.08978	2.07111	-0.247909	-0.629623	-0.812376	-0.385989	AT1G11330	S-locus lectin protein kinase family protein	-0.387002	-0.465686	-0.434177	-0.660946	-0.864464	-0.61543	-0.786005	-0.446137
AT1G20520	hypothetical protein	-1.13582	-1.98331	-2.07398	-3.05179	-1.09438	0.0189934	-1.06856	-1.17306	AT1G11580	ATPMEPCRA; pectinesterase	-0.731106	-0.602516	-0.928681	-1.25683	-0.524116	-1.28709	-1.07023	-1.19752
AT1G21100	O-methyltransferase, putative	-0.736156	-0.925593	-1.01069	-1.16416	-0.699935	-0.560685	-0.816408	-0.678964	AT1G11700	hypothetical protein	0.275145	0.138139	0.393337	0.588392	0.310864	0.738062	0.920847	1.29218
AT1G21110	O-methyltransferase, putative	-1.45016	-1.1779	-0.876166	-0.382698	-0.0339685	0.0381937	0.14815	0.250296	AT1G11740	ankyrin repeat family protein	-0.247175	-1.26953	-1.92827	-2.38057	-1.17793	-0.75682	-1.37692	-1.5713
AT1G21270	WAK2 (wall-associated kinase 2); protein serine/threonine kinase	-0.261697	-0.386642	-0.533693	-1.01306	-0.172441	-0.0686618	-0.413548	-0.249575	AT1G11840	ATGLX1 (GLYOXALASE I HOMOLOG); lactoylglutathione lyase	0.455688	0.489668	0.756216	0.792019	0.476742	0.489257	0.574807	0.741884
AT1G22030	hypothetical protein	-0.549611	-0.661276	-1.09017	-1.41347	-0.0625001	-0.634072	-0.445325	-0.858502	AT1G12010	1-aminocyclopropane-1-carboxylate oxidase, putative / ACC oxidase, putative	-1.82599	-2.34455	-3.46073	-4.58828	-1.87266	-2.2371	-2.76619	-2.9078
AT1G23850	hypothetical protein	-1.20243	-1.04745	-0.786356	-0.528163	-0.136989	-0.572278	-0.554155	-0.122588	AT1G12080	hypothetical protein	-0.919118	-1.16596	-1.29987	-1.70734	-0.190793	-0.49613	-0.338182	-1.36067
AT1G24020	MLP423 (MLP-LIKE PROTEIN 423)	0.443263	0.552001	0.867986	0.65776	0.042801	0.0504148	0.176377	0.277616	AT1G12100	lipid binding	-0.885042	-0.351249	-0.531656	-1.33979	-0.394651	-1.06385	-0.620579	-1.41041
AT1G24270	hypothetical protein	0.907902	1.83248	2.67597	2.06552	-0.473609	0.814832	1.06663	1.12694	AT1G12500	phosphate translocator-related	-0.646522	-0.303998	-0.411433	-0.724627	-0.861773	-1.12315	-0.611431	-1.89262
AT1G24480	methyltransferase	-0.340162	-0.371621	-0.729909	-1.24339	0.245664	0.307856	-0.0803044	-0.216705	AT1G12560	ATEXPA7 (ARABIDOPSIS THALIANA EXPANSIN A7)	-0.0806974	-0.305211	-0.828141	-1.45483	-0.453719	-0.162764	-0.670161	-0.826297
AT1G24540	CYP86C1 (cytochrome P450, family 86, subfamily C, polypeptide 1); oxygen binding	-0.423266	-1.34963	-2.07097	-2.21432	-0.360981	0.0729515	-1.73965	0.551937	AT1G12740	CYP87A2 (cytochrome P450, family 87, subfamily A, polypeptide 2); oxygen binding	-0.865736	-1.0667	-1.95693	-2.06894	-0.648019	-0.141077	-0.186394	-0.0826474
AT1G24792	pseudo	-0.421682	-0.511752	-0.992519	-1.03863	0.353343	0.483989	0.921015	0.59978	AT1G12845	hypothetical protein	0.41498	0.7795	1.02494	1.45144	0.910569	0.559407	1.02205	0.959865
AT1G25400	hypothetical protein	-0.971169	-0.834054	-0.759657	-1.0655	-0.053116	-0.50419	-0.657757	-0.787207	AT1G12880	ATNUDT12 (Arabidopsis thaliana Nudix hydrolase homolog 12); hydrolase	0.76503	1.0218	0.850722	0.906989	0.964295	0.923359	1.09034	0.745851
AT1G26360	hydrolase, alpha/beta fold family protein	0.057062	-0.531259	-1.36025	-2.39494	0.187863	0.235542	-0.507816	-0.585122	AT1G12890	AP2 domain-containing transcription factor, putative	1.58166	2.54965	2.9247	3.51535	1.60994	1.75625	2.25562	1.98368
AT1G26410	FAD-binding domain-containing protein	-5.28663	-4.10138	-3.57794	-3.90948	-3.14546	-1.93436	-0.970919	-0.181338	AT1G12950	MATE efflux family protein	-0.303116	-0.549192	-0.956177	-1.08963	-0.478422	-0.2213	-0.685609	-0.679464
AT1G27140	ATGSTU14 (GLUTATHIONE S-TRANSFERASE 13); glutathione transferase	-0.0839219	-0.471464	-1.06216	-0.92181	0.196118	0.818939	0.755876	0.27423	AT1G13080	CYP71B2 (CYTOCHROME P450 71B2); oxygen binding	0.732947	0.524691	0.665935	0.382355	0.772476	1.22069	0.679619	1.17753
AT1G27240	paired amphipathic helix repeat-containing protein	-2.54434	-2.51977	-2.51373	-2.51137	-1.80387	-0.268151	-2.515	-2.46635	AT1G13260	RAV1 (Related to ABI3/VP1 1); DNA binding / transcription factor	-1.54493	-1.01886	-0.739589	-0.545611	-0.629885	-1.83146	-1.03835	-3.12994
AT1G27740	basic helix-loop-helix (bHLH) family protein	-0.357802	-0.948019	-1.31787	-1.39237	-0.455847	-0.0488021	-0.794057	-0.736132	AT1G13300	myb family transcription factor	-0.662651	-0.731319	-1.07073	-1.66284	-0.457182	-0.213455	-0.494159	-0.296469
AT1G27940	PGP13 (P-GLYCOPROTEIN 13); ATPase, coupled to transmembrane movement of substances	0.804275	0.72611	0.926284	1.02287	0.390183	0.161312	-0.224458	0.217489	AT1G13448	misc_RNA	0.71988	0.444379	0.51264	0.168518	1.77615	1.5194	1.01988	0.976232
AT1G27990	hypothetical protein	-0.467891	-0.683146	-0.46464	-0.607577	-0.533818	-0.868557	-0.651085	-0.405762	AT1G13480	hypothetical protein	-1.39414	-1.44044	-1.82259	-1.43217	-1.13181	-1.53976	-1.51533	-1.44751
AT1G28480	GRX480; thiol-disulfide exchange intermediate	0.133097	0.310093	0.961689	1.85818	-0.182048	1.38674	0.508094	2.46641	AT1G13520	hypothetical protein	-1.09127	-0.938834	-0.562142	-0.253442	-0.559004	-0.42515	-0.414489	-0.297209
AT1G28600	lipase, putative	0.0359107	0.473838	0.900567	1.27361	-0.0494215	-0.36696	-0.26768	-0.247531	AT1G13610	hypothetical protein	-0.361052	-0.324341	-0.971363	-1.49513	-0.105484	-1.22892	-0.841447	-1.92007
AT1G28660	lipase, putative	-0.51136	-0.826494	-1.01612	-0.761855	0.131528	0.152923	0.00985301	0.240377	AT1G14240	nucleoside phosphatase family protein / GDA1/CD39 family protein	0.179723	0.142073	0.590156	1.90337	1.41638	1.22134	0.810623	1.68591
AT1G29200	hypothetical protein	-0.282133	-0.324092	-0.81294	-1.10201	0.495855	0.236903	0.163036	0.0877679	AT1G14500	ankyrin repeat family protein	-0.325969	-0.441002	-0.984772	-1.55697	-0.742675	-0.613117	-0.788922	-1.32547
AT1G29430	auxin-responsive family protein	1.28762	0.99853	1.15223	1.06214	0.175454	0.224875	-0.254308	0.337605	AT1G14540	anionic peroxidase, putative	-1.67254	-1.84322	-1.27808	-0.933994	-0.87635	-0.992756	-0.94177	-1.18286
AT1G29440	hypothetical protein	0.957472	0.955632	1.10215	1.07212	0.03496	0.132374	-0.0572649	0.108102	AT1G14630	hypothetical protein	0.631819	0.341321	0.253789	0.837745	0.80221	0.835048	0.944809	1.65771
AT1G29450	auxin-responsive protein, putative	1.2725	1.18813	1.41938	1.29761	-0.09901	0.168875	-0.15828	-0.205414	AT1G14870	hypothetical protein	-1.23036	-1.17492	-0.818815	-0.467557	-1.00741	-0.867926	-0.833483	-0.417786
AT1G29460	auxin-responsive protein, putative	1.28695	1.0445	1.1378	0.756447	0.125972	0.432105	-0.015706	-0.000832005	AT1G15010	hypothetical protein	1.74498	2.17502	2.86791	3.19072	1.03877	1.50595	1.16449	1.17345
AT1G29610	hypothetical protein	-1.05011	-0.620787	-0.851676	-0.445784	0.400739	-0.364213	0.148609	-1.14849	AT1G15125	S-adenosylmethionine-dependent methyltransferase	-1.85532	-2.19482	-3.48677	-3.4598	-2.91193	-2.90182	-2.01293	-3.05497
AT1G29720	protein kinase family protein	-0.406518	-0.673248	-0.859313	-1.48363	-0.813408	-0.267867	-0.465217	-0.66325	AT1G15150	MATE efflux family protein	0.572112	0.994138	1.30547	1.09311	1.59967	1.29605	1.60241	2.40217
AT1G30250	hypothetical protein	0.916026	1.84149	3.25279	5.0868	-0.0260955	0.421967	0.92273	1.49552	AT1G15210	ATPDR7/PDR7 (PLEIOTROPIC DRUG RESISTANCE 7); ATPase, coupled to transmembrane movement of substances	-0.659898	-0.412519	-0.864529	-1.14652	-0.64043	-0.827702	-0.436212	-1.41606
AT1G30260	AGL79 (AGAMOUS-LIKE 79)	0.462927	0.355775	1.10087	1.62191	0.0619587	0.46342	0.63828	0.381835	AT1G15310	ATHSRP54A (Arabidopsis thaliana signal recognition particle 54kDa A); 7S RNA binding / GTP binding / mRNA binding	0.1241	0.197977	0.48611	0.866005	1.17051	1.23008	1.41802	1.96141
AT1G30475	hypothetical protein	0.453406	0.41233	0.734038	0.967247	0.313453	0.348084	0.238797	0.41463	AT1G15380	lactoylglutathione lyase family protein / glyoxalase I family protein	-0.597359	-1.08579	-1.35968	-1.67269	-1.20457	-0.998921	-1.28883	-1.20831
AT1G30740	FAD-binding domain-containing protein	1.49432	1.47259	1.64654	1.47818	0.798113	1.22994	0.831882	0.599454	AT1G15385	hypothetical protein	-0.207745	-0.159317	-0.70384	-1.17132	-0.992499	-0.757462	-0.794057	-1.34763
AT1G30814	hypothetical protein	0.523322	1.39197	1.29201	0.271704	0.251308	-0.661364	-0.290351	0.531876	AT1G15580	IAA5 (indoleacetic acid-induced protein 5); transcription factor	1.29457	0.856647	1.08576	1.2851	0.465041	1.14688	0.326716	0.615003
AT1G30870	cationic peroxidase, putative	-0.0611474	-0.406839	-0.905508	-1.4015	-0.345708	0.00586768	-0.612982	-0.340821	AT1G15640	hypothetical protein	0.73215	0.542217	0.787976	0.673072	0.472844	0.794597	0.657383	1.24796
AT1G31140	AGL63 (AGAMOUS-LIKE 63); DNA binding / transcription factor	1.9529	1.97193	2.82744	2.87312	0.379382	1.43457	1.45576	1.59843	AT1G15890	disease resistance protein (CC-NBS-LRR class), putative	-0.195287	-0.418247	-0.552291	-1.13806	-0.679641	-0.17884	-0.56801	-0.338352
AT1G31290	PAZ domain-containing protein / piwi domain-containing protein	-0.122101	0.197755	0.000975168	-0.0850301	-0.391885	-0.560801	-0.94204	-0.555709	AT1G16160	WAKL5 (WALL ASSOCIATED KINASE-LIKE 5); kinase	-0.334291	-0.370572	-0.7771	-0.952879	-0.62174	-0.671661	-0.854095	-1.16929
AT1G31485	misc_RNA	-0.573462	-0.592574	-1.13427	-1.30675	-0.18012	0.149913	0.357558	0.412632	AT1G16390	ATOCT3 (ARABIDOPSIS THALIANA ORGANIC CATION/CARNITINE TRANSPORTER2); carbohydrate transmembrane transporter/ sugar:hydrogen ion symporter	-1.41646	-1.50467	-1.85171	-1.92931	-0.531703	-0.653355	-0.77503	-0.58688
AT1G31950	terpene synthase/cyclase family protein	-0.237136	-0.269909	-1.53693	-1.6661	-0.150619	0.153368	0.166081	-0.0940226	AT1G16400	CYP79F2 (cytochrome P450, family 79, subfamily F, polypeptide 2); oxygen binding	-0.638237	-0.39967	-0.829778	-1.13937	-0.672882	-0.970377	-1.20399	-0.936781
AT1G33750	terpene synthase/cyclase family protein	-0.640553	-0.452267	-1.78912	-1.99256	-0.407869	-0.143995	0.112084	-0.3607	AT1G16410	CYP79F1 (SUPERSHOOT 1)	0.557901	0.825869	0.967803	0.781377	1.30519	1.1684	1.271	1.82452
AT1G33960	AIG1 (AVRRPT2-INDUCED GENE 1); GTP binding	1.41147	2.13349	2.84332	3.53765	0.0452457	2.11824	0.760344	1.51653	AT1G16720	HCF173 (HIGH CHLOROPHYLL FLUORESCENCE PHENOTYPE 173); binding / catalytic/ oxidoreductase/ transcription repressor	-0.147396	-0.562429	-0.781234	-0.90151	0.0743934	-0.0367732	-0.38449	-0.174331
AT1G34047	hypothetical protein	-0.238221	-1.03723	-2.41417	-2.50982	0.972899	-2.13018	-3.04291	-3.79795	AT1G16730	hypothetical protein	0.552425	0.344163	1.19573	1.82607	0.814659	0.567003	0.521605	0.62429
AT1G34330	pseudo	-0.524436	-0.927591	-1.92573	-1.16454	-0.468538	-0.116296	-0.952442	-0.956706	AT1G16850	hypothetical protein	1.64935	2.05615	2.89371	3.23496	2.43554	2.80435	2.90772	3.06959
AT1G34460	CYCB1;4 (CYCLIN 3); cyclin-dependent protein kinase regulator	-0.517721	-0.634752	-1.16602	-0.330819	0.0126411	-0.153124	0.235972	-0.254538	AT1G16905	sugar binding	-0.443165	-0.420454	-1.16162	-1.14878	-0.742164	-0.52097	-0.472868	-0.404484
AT1G34520	long-chain-alcohol O-fatty-acyltransferase family protein / wax synthase family protein	-0.453875	-1.80399	-1.3467	-1.51995	-0.386773	0.149719	-1.64933	-2.00346	AT1G17020	SRG1 (SENESCENCE-RELATED GENE 1); oxidoreductase, acting on paired donors, with incorporation or reduction of molecular oxygen, 2-oxoglutarate as one donor, and incorporation of one atom each of oxygen into both donors	0.12586	0.147624	0.812413	1.24491	0.667776	0.338606	0.326643	0.897075
AT1G34540	CYP94D1 (cytochrome P450, family 94, subfamily D, polypeptide 1); oxygen binding	-0.536616	-0.846534	-0.558034	-1.04069	-0.0771366	-0.419761	-0.137901	-3.11203	AT1G17235	RTFL11 (ROTUNDIFOLIA LIKE 11)	-0.893993	-0.652885	-1.48344	-2.04122	-0.716105	-0.885792	-0.556736	-2.19637
AT1G35170	hypothetical protein	0.503251	0.553068	0.869095	1.21954	0.681388	0.539473	0.260619	0.561831	AT1G17285	hypothetical protein	-0.70068	-0.692738	-1.22881	-1.6537	-0.422595	-0.491762	-0.362019	-1.24938
AT1G35290	thioesterase family protein	0.653201	0.714581	1.43097	1.52387	-0.797069	-0.110386	-0.459025	-0.453134	AT1G17300	hypothetical protein	-1.72519	-2.05477	-2.34871	-3.14016	-0.926394	-0.77778	-1.20888	-1.45437
AT1G35430	hypothetical protein	0.366241	0.275524	0.588632	0.624604	0.264452	0.140573	0.165435	-0.0220597	AT1G17310	MADS-box protein (AGL100)	-0.470847	-0.535653	-1.049	-1.28782	-0.335201	-0.390852	-0.787594	-0.376632
AT1G43040	auxin-responsive protein, putative	-0.0806954	-0.31382	-0.51271	-1.05517	0.124418	-0.53703	-0.853622	-1.50952	AT1G17380	JAZ5/TIFY11A (JASMONATE-ZIM-DOMAIN PROTEIN 5)	1.13236	1.47769	3.08694	3.52784	1.25351	1.32148	1.15444	1.72135
AT1G43790	hypothetical protein	-0.276237	-0.309239	-0.826778	-1.30156	0.0108267	0.121456	-0.186251	-0.161586	AT1G17420	LOX3 (Lipoxygenase 3); iron ion binding / lipoxygenase/ metal ion binding / oxidoreductase, acting on single donors with incorporation of molecular oxygen, incorporation of two atoms of oxygen	-0.53786	-0.842874	-0.404673	-0.66543	-0.593901	-0.538189	-0.690149	-0.554023
AT1G43800	acyl-(acyl-carrier-protein) desaturase, putative / stearoyl-ACP desaturase, putative	-1.14446	-0.663717	-0.845743	-0.881691	-0.726725	-1.1432	-0.270349	-1.80418	AT1G17710	phosphoric monoester hydrolase	-1.00981	-2.24233	-2.66354	-2.87493	-0.895058	-0.50072	-1.04541	-0.791573
AT1G44350	ILL6 (IAA-leucine resistant (ILR)-like gene 6); metallopeptidase	0.33847	0.665982	1.90232	2.16072	0.555212	0.222338	0.328027	-0.0594835	AT1G17720	ATB BETA (Arabidopsis thaliana serine/threonine protein phosphatase 2A 55 kDa regulatory subunit B beta isofor); nucleotide binding	0.0992788	0.251758	0.359937	0.3899	0.0437346	-0.0621824	0.160687	0.00577092
AT1G45545	hypothetical protein	-0.877082	-0.703167	-1.27382	-1.45766	-0.112595	0.309466	-0.555083	0.205937	AT1G17744	hypothetical protein	1.27335	1.0359	1.70715	1.9643	1.76781	1.96447	1.43919	2.16463
AT1G46768	RAP2 (related to AP2 1); DNA binding / transcription factor	-0.38356	-0.900635	-0.999988	-0.307966	0.809453	0.238436	-0.237749	0.591345	AT1G17830	hypothetical protein	0.326571	0.82296	1.86593	2.01852	0.789966	0.473363	1.09096	0.482199
AT1G47271	hypothetical protein	-0.159212	-0.316999	-0.560189	-1.17899	0.0214044	-0.125165	-0.509429	-0.58589	AT1G18100	E12A11; phosphatidylethanolamine binding	1.43355	1.84114	2.09307	2.10741	1.45129	1.8145	1.95665	2.32987
AT1G47395	hypothetical protein	0.338262	1.37837	1.89772	3.2562	0.529393	-1.72312	-2.16233	-1.1822	AT1G18265	hypothetical protein	0.59182	0.212435	0.398029	0.626099	1.24228	1.28642	1.16622	1.47792
AT1G47400	hypothetical protein	0.742202	1.80707	1.97434	3.04842	0.899286	-1.81484	-2.36083	-1.66858	AT1G18270	ketose-bisphosphate aldolase class-II family protein	-0.392446	-0.499897	-0.761739	-0.954344	-0.316642	-0.128456	-0.386725	-0.208207
AT1G47590	pseudo	-0.117061	-0.473116	-0.615296	-0.999595	-0.169352	0.382481	0.0677396	-0.0915658	AT1G18420	hypothetical protein	-0.312192	-0.38267	-0.82472	-0.971069	-0.355856	-0.218152	-0.34303	-0.928335
AT1G47610	transducin family protein / WD-40 repeat family protein	-0.628578	-1.85252	-1.9898	-1.79322	-0.464926	0.198673	-0.670406	-0.288145	AT1G18690	transferase/ transferase, transferring glycosyl groups	-0.528052	-0.488694	-0.966268	-1.09221	-0.507974	-0.395056	-0.631011	-0.495575
AT1G47860	pseudo	0.0220329	0.267727	0.394927	0.562891	-0.250384	-0.0853797	0.050591	-0.0884884	AT1G18710	AtMYB47 (myb domain protein 47); DNA binding / transcription factor	4.00223	4.80329	5.6828	5.7681	4.42805	5.5636	5.6664	6.3434
AT1G48020	invertase/pectin methylesterase inhibitor family protein	-0.330602	-0.893207	-1.75936	-1.84368	-0.253055	0.230048	0.0761184	0.174541	AT1G18970	GLP4 (GERMIN-LIKE PROTEIN 4); manganese ion binding / metal ion binding / nutrient reservoir	-1.73528	-1.80979	-1.55358	-1.10802	-2.05105	-1.84216	-2.10087	-1.49801
AT1G48590	C2 domain-containing protein	2.9894	2.92281	3.38683	3.47989	1.31384	2.16462	2.49966	2.40802	AT1G19390	wall-associated kinase, putative	-0.373342	-0.480461	-0.670279	-1.04095	-0.109894	-0.279173	-0.377358	-0.26991
AT1G48930	ATGH9C1 (ARABIDOPSIS THALIANA GLYCOSYL HYDROLASE 9C1); hydrolase, hydrolyzing O-glycosyl compounds	-0.0948087	-0.477676	-1.05561	-1.37037	-0.287006	-0.0608158	-0.665513	-0.482281	AT1G19630	CYP722A1 (cytochrome P450, family 722, subfamily A, polypeptide 1); oxygen binding	0.274203	0.385326	0.330238	0.170013	1.09496	0.581816	0.379486	0.427853
AT1G49210	zinc finger (C3HC4-type RING finger) family protein	-0.129714	-0.472735	-1.06806	-1.73289	0.15455	-0.312119	-0.744104	-0.868471	AT1G19640	JMT (JASMONIC ACID CARBOXYL METHYLTRANSFERASE); jasmonate O-methyltransferase	0.906608	1.30568	1.30364	0.881637	0.502573	0.509571	0.588133	0.949202
AT1G49620	ICK5/ICN6/KRP7 (KIP-RELATED PROTEIN 7); cyclin binding / cyclin-dependent protein kinase inhibitor	0.666643	0.793356	1.09344	1.18933	-0.050147	0.216378	0.530012	0.387408	AT1G19750	transducin family protein / WD-40 repeat family protein	0.254728	0.371701	0.410062	1.80527	1.25761	0.934904	1.11019	1.58509
AT1G49940	hypothetical protein	-0.217844	-0.260854	-1.12428	-1.38815	-0.122273	0.126543	0.441499	0.0162096	AT1G20310	hypothetical protein	1.65019	1.89184	3.27604	2.92601	1.46489	2.31321	2.17402	2.23572
AT1G50090	aminotransferase class IV family protein	0.80154	1.07832	1.07318	1.1702	-0.147179	-0.210156	-0.104435	0.200192	AT1G20470	auxin-responsive family protein	-0.149953	-0.395203	-0.558814	-1.02931	-0.459036	-0.487335	-0.79279	-1.10549
AT1G50930	hypothetical protein	-0.243329	-0.794772	-1.13131	-1.67287	0.215723	0.448019	-0.200895	-0.306642	AT1G20490	AMP-dependent synthetase and ligase family protein	0.244476	0.195539	0.702757	1.25257	0.748566	1.42044	1.4196	1.97502
AT1G51190	PLT2 (PLETHORA 2); transcription factor	-0.475188	-0.404107	-1.2907	-1.71893	-0.537403	-0.215055	0.157029	-0.305119	AT1G20696	HMGB3 (HIGH MOBILITY GROUP B 3); transcription factor	-0.839562	-0.118983	0.784534	2.64249	0.953675	-0.0363484	0.623017	0.483946
AT1G51470	glycosyl hydrolase family 1 protein	-0.324603	-0.631917	-1.28617	-1.5173	-0.521773	-0.0252828	-0.413205	-0.372931	AT1G21100	O-methyltransferase, putative	-0.736156	-0.925593	-1.01069	-1.16416	-0.699935	-0.560685	-0.816408	-0.678964
AT1G51700	ADOF1 (Arabidopsis dof zinc finger protein 1); DNA binding / transcription factor	0.430832	0.479271	0.993974	1.14138	0.231969	0.30709	0.562979	-0.0550086	AT1G21130	O-methyltransferase, putative	-0.599226	-0.879979	-0.913882	-1.16379	-0.565135	-0.452007	-0.835979	-0.541059
AT1G51920	hypothetical protein	-1.77548	-1.82139	-1.71276	-1.12529	-0.930794	0.0457894	0.665152	0.4369	AT1G21230	WAK5 (WALL ASSOCIATED KINASE 5); kinase/ protein serine/threonine kinase	-2.37612	-1.99537	-2.4341	-2.07914	-2.11657	-2.52297	-2.57453	-2.53893
AT1G51960	IQD27 (IQ-domain 27); calmodulin binding	0.865803	0.932869	1.46827	1.30129	0.2925	1.19292	1.24011	1.41124	AT1G21320	nucleic acid binding / nucleotide binding	-2.27242	-1.38812	-2.09207	-2.11229	-2.05291	-2.99388	-3.01107	-3.55122
AT1G52060	hypothetical protein	-0.167168	-0.272138	-1.04908	-0.954722	-0.588052	-0.131578	-0.256125	0.278972	AT1G21326	VQ motif-containing protein	-1.88739	-1.66891	-2.03885	-1.6323	-1.16447	-1.55505	-1.53237	-1.38882
AT1G52270	hypothetical protein	-0.829806	-1.32354	-1.57481	-2.03776	-0.25713	-0.0348057	-0.503335	-0.514894	AT1G21520	hypothetical protein	0.752874	0.960023	1.97689	1.8533	0.117803	0.733973	0.593618	0.691771
AT1G52440	hypothetical protein	-1.25208	-0.650165	-0.700067	-1.32191	-0.288043	-1.10381	-1.59814	-2.25549	AT1G21525	pseudo	0.967768	1.59929	2.13468	2.32077	0.590694	1.51771	0.990178	0.625859
AT1G53790	F-box family protein	0.403371	0.543274	0.933179	1.41297	0.367535	0.179322	0.150834	0.638515	AT1G21530	AMP-binding protein, putative	-1.17269	-0.633531	-2.08682	-2.84269	-1.02272	-0.733555	-0.719443	-1.74435
AT1G54000	myrosinase-associated protein, putative	-0.487082	-0.735076	-0.856634	-0.479756	-0.257852	0.101732	0.0670639	0.399805	AT1G21670	hypothetical protein	0.0565656	0.0171911	0.169699	0.300564	0.137666	0.213856	0.0563105	0.504433
AT1G54860	hypothetical protein	1.16252	0.829058	0.501694	0.664464	-0.0192294	-0.410249	0.604367	0.157325	AT1G22150	SULTR1;3 (sulfate transporter); sulfate transmembrane transporter	0.251815	0.310516	0.344135	1.3177	0.802187	1.79094	1.41149	1.34091
AT1G54890	late embryogenesis abundant protein-related / LEA protein-related	-0.639952	-0.478502	-1.30664	-1.56974	-0.351884	-0.907	-0.590914	-1.27119	AT1G22330	RNA binding	-0.680313	-0.204155	-0.642522	-0.86902	-0.565584	-0.741232	-0.571824	-1.32661
AT1G55030	F-box family protein	-0.926652	-1.0174	-1.61135	-0.781853	-0.268743	-1.19884	-0.946134	-1.15507	AT1G22340	ATUGT85A7 (UDP-GLUCOSYL TRANSFERASE 85A7); UDP-glycosyltransferase/ glucuronosyltransferase/ transferase, transferring glycosyl groups	0.80979	1.10359	2.04146	1.92318	0.42623	0.615259	0.750097	1.18142
AT1G55546	hypothetical protein	0.524153	0.242208	0.625953	4.23912	3.72797	2.6216	2.10465	3.71143	AT1G22530	PATL2; transporter	-0.617186	-0.54726	-0.650131	-0.861911	-0.879943	-0.877425	-0.741407	-1.30346
AT1G55980	hypothetical protein	-0.735438	-0.544546	-0.489141	-0.758791	-0.783125	0.488705	-0.0274869	-0.730488	AT1G22770	GI (GIGANTEA); binding	-0.604501	-0.554457	-0.684141	-0.878912	-0.818183	-1.09352	-0.936017	-0.941892
AT1G56160	AtMYB72/MYB72 (myb domain protein 72); DNA binding / transcription factor	-0.605508	-1.37492	-1.11827	-0.769216	1.02978	-2.71979	-3.75726	-3.50536	AT1G22880	ATCEL5/ATGH9B4 (ARABIDOPSIS THALIANA GLYCOSYL HYDROLASE 9B4); hydrolase, hydrolyzing O-glycosyl compounds	-0.714859	-0.483274	-1.33565	-1.92948	-0.691271	-0.796582	-0.760864	-1.06013
AT1G56240	ATPP2-B13 (Phloem protein 2-B13); carbohydrate binding	-1.5235	-1.66594	-0.998533	-0.798484	-0.461028	-0.533145	-0.272017	-0.65991	AT1G22980	hypothetical protein	-0.533189	-0.592372	-0.920141	-1.2826	-0.234335	-0.505224	-0.30475	-0.425475
AT1G56430	nicotianamine synthase, putative	0.201898	1.02437	1.23731	1.85707	0.0991092	-0.809478	-0.334856	-0.822409	AT1G22990	heavy-metal-associated domain-containing protein / copper chaperone (CCH)-related	0.33887	0.249552	0.694919	0.513497	1.05782	0.74412	0.743893	1.03175
AT1G56490	pseudo	1.19102	1.0095	0.997139	1.06921	1.3649	1.33146	0.845155	1.73996	AT1G23090	AST91 (SULFATE TRANSPORTER 91); sulfate transmembrane transporter	-0.518515	-0.450571	-0.30532	-0.443427	-0.759291	-0.82173	-0.490852	-1.3645
AT1G56500	haloacid dehalogenase-like hydrolase family protein	0.107407	-0.250494	-0.675115	-0.977643	0.0592447	-0.0461166	-0.423198	-0.0185991	AT1G23130	Bet v I allergen family protein	-0.259251	-0.51198	-0.75609	-1.04314	-0.305573	-0.313567	-0.571837	-0.789737
AT1G56680	glycoside hydrolase family 19 protein	-1.34668	-0.413667	-1.24049	-1.86909	-0.377847	-0.495675	0.130283	-0.474834	AT1G23201	pseudo	2.18382	2.30344	3.2578	3.8898	1.51233	2.31909	2.16068	2.3836
AT1G58320	hypothetical protein	-1.35686	-2.58787	-1.50557	-1.03663	0.98707	2.13916	2.17563	0.93807	AT1G24070	ATCSLA10 (Cellulose synthase-like A10); transferase, transferring glycosyl groups	0.597339	0.663045	1.44154	1.60384	1.14	1.53257	2.20478	2.6345
AT1G58480	GDSL-motif lipase, putative	0.960322	0.588287	0.996586	1.44563	0.745551	0.468931	-0.0229056	0.501165	AT1G24130	transducin family protein / WD-40 repeat family protein	0.368419	0.323215	0.411967	0.259198	1.41566	1.35827	1.131	1.48555
AT1G59030	carboxylesterase/ lipase	1.15253	0.748876	0.962001	0.921002	0.345367	0.259159	-0.209082	0.208752	AT1G24260	SEP3 (SEPALLATA3); transcription factor	-1.27006	-2.05534	-2.309	-2.92181	-1.09963	-2.19116	-2.45154	-3.56401
AT1G59530	ATBZIP4 (ARABIDOPSIS THALIANA BASIC LEUCINE-ZIPPER); DNA binding / transcription factor	2.0301	2.4976	3.01003	3.1616	2.03212	1.69099	1.78147	0.890225	AT1G24485	hypothetical protein	-0.855757	-1.4681	-2.94572	-2.7543	-0.906507	-0.688823	-1.17711	-1.0736
AT1G59660	nucleoporin family protein	-0.215522	-0.237924	-0.797567	-1.09237	0.0852726	0.185083	0.143117	0.188004	AT1G24575	hypothetical protein	-0.978333	-1.39997	-1.25419	-1.53452	-1.002	-0.938876	-1.74003	-1.72353
AT1G59950	aldo/keto reductase, putative	-0.362896	-0.972225	-2.06792	-2.02053	-1.7897	-0.463156	-1.21081	-1.20167	AT1G24600	hypothetical protein	0.488533	0.275667	0.602356	0.522206	1.1174	0.812618	0.728047	0.936352
AT1G60460	hypothetical protein	1.90218	1.76338	2.11054	1.93371	1.53393	1.76286	1.49461	1.66283	AT1G25025	hypothetical protein	-0.557821	-0.29694	-0.564686	-0.45301	-1.06435	-0.759685	-0.344515	-0.972975
AT1G60960	IRT3 (Iron regulated transporter 3); cation transmembrane transporter/ metal ion transmembrane transporter	-0.0595518	-0.309338	-1.13676	-1.12907	0.00275176	-0.409687	-0.898423	-0.73403	AT1G25425	CLE43 (CLAVATA3/ESR-RELATED 43)	0.605771	0.7134	1.17011	1.16329	0.389487	0.444345	0.597082	0.490246
AT1G61080	proline-rich family protein	-0.220303	-0.738792	-1.93541	-4.08643	-0.905573	-0.0859032	-1.05567	-0.326811	AT1G25430	pseudo	-0.208842	-0.662953	-1.14328	-1.89738	-0.858259	-1.49919	-1.75805	-1.8896
AT1G61230	pseudo	-0.787468	-0.496956	-1.40077	-0.888414	-0.643506	-0.411009	-0.127567	-0.719818	AT1G26200	pseudo	-1.12661	-1.27643	-1.88023	-2.47686	-1.06228	-1.17997	-1.59702	-1.94474
AT1G61270	lysine and histidine specific transporter, putative	-0.985694	-1.59716	-2.70333	-2.33751	0.167795	0.477171	-0.611067	-0.219291	AT1G26208	miscRNA	0.112334	-0.232136	0.0512148	-0.821176	-0.157076	0.030096	0.0902224	-1.18759
AT1G61290	SYP124 (syntaxin 124); SNAP receptor	-0.478057	-0.78572	-1.02526	-1.37443	-0.408537	-0.282982	0.0200687	-0.404931	AT1G26250	proline-rich extensin, putative	-1.7574	-2.30145	-2.67341	-2.91645	-2.9903	-3.86043	-4.4964	-4.47153
AT1G61610	S-locus lectin protein kinase family protein	0.668604	0.903678	2.79992	2.51632	0.339322	0.664271	0.19725	0.427104	AT1G26310	CAL (CAULIFLOWER); DNA binding / transcription factor	-0.39242	-0.910547	-1.57248	-2.92009	-1.0006	-0.919474	-1.46089	-2.9093
AT1G62510	protease inhibitor/seed storage/lipid transfer protein (LTP) family protein	-1.04086	-1.46289	-1.24017	-1.33653	0.626182	0.105761	0.0222406	-0.501108	AT1G26380	FAD-binding domain-containing protein	-3.55684	-3.41317	-4.24135	-4.18539	-2.25456	-1.64097	-0.905275	-0.307757
AT1G62760	invertase/pectin methylesterase inhibitor family protein	0.966094	0.996984	1.40669	1.06864	-0.0443334	0.276066	-0.0531492	-0.431687	AT1G26390	FAD-binding domain-containing protein	-4.5897	-3.19816	-3.10756	-3.98639	-1.5429	-1.00966	-0.354728	-1.21178
AT1G62940	4-coumarate--CoA ligase family protein / 4-coumaroyl-CoA synthase family protein	-0.568736	-0.905534	-1.74912	-2.29488	-0.821026	0.560395	0.0339521	-0.0771289	AT1G26560	glycosyl hydrolase family 1 protein	0.842451	0.901409	1.53584	1.77136	0.862788	0.921072	0.872302	1.18558
AT1G63450	catalytic	-0.203162	-0.705361	-1.52098	-1.76146	-0.11985	0.188356	-0.408839	-0.293052	AT1G26700	MLO14 (MILDEW RESISTANCE LOCUS O 14); calmodulin binding	-0.0710472	-0.160833	-1.07408	-1.5464	-0.740964	-0.65308	-1.11734	-2.18497
AT1G63520	hypothetical protein	-0.184284	-0.214507	-0.704805	-1.53529	-0.0791517	-0.0551217	-0.278439	-0.397104	AT1G26770	ATEXPA10 (ARABIDOPSIS THALIANA EXPANSIN A10)	1.15593	1.26413	2.66115	2.92852	0.706012	0.800354	1.24683	1.16749
AT1G63600	protein kinase-related	-0.512558	-1.68657	-1.98743	-2.19686	-0.192017	0.208178	-0.556528	-2.30831	AT1G26870	ANAC009 (Arabidopsis NAC domain containing protein 9); transcription factor	-0.673092	-0.538238	-1.37621	-1.94442	-0.71258	-0.777904	-0.535429	-1.30686
AT1G63950	heavy-metal-associated domain-containing protein	0.985207	1.34813	2.25888	2.95304	0.333731	0.832677	1.50451	2.46249	AT1G27020	hypothetical protein	-1.32528	-1.86301	-2.23391	-1.99675	-1.2189	-1.36871	-1.39698	-1.19848
AT1G64340	hypothetical protein	-1.98429	-2.14374	-1.1087	-2.1167	0.40386	-1.04649	-1.7582	-1.99823	AT1G27360	squamosa promoter-binding protein-like 11 (SPL11)	-0.0510907	-0.398884	-0.610398	-0.886052	-0.200879	-0.16333	-0.376165	-0.425282
AT1G64360	hypothetical protein	-0.877254	-1.23912	-1.71136	-2.26838	0.918691	-0.0987642	-0.582024	-0.639721	AT1G28040	protein binding / zinc ion binding	-1.15546	-2.3468	-3.98046	-5.33203	-3.48636	-3.59072	-4.94757	-5.44385
AT1G64760	glycosyl hydrolase family 17 protein	0.232912	0.734873	0.910341	1.03808	0.293797	-0.151378	-0.0890202	-0.0670961	AT1G28170	sulfotransferase family protein	-1.54933	-1.4315	-2.98444	-3.65255	-1.67836	-2.2331	-1.80708	-3.72625
AT1G65347	pseudo	0.430998	0.628375	0.776032	1.05022	0.787471	0.149796	0.166815	0.0805287	AT1G28230	PUP1 (PURINE PERMEASE 1); purine transmembrane transporter	0.576158	0.794057	1.27181	1.20548	0.913735	1.03977	0.998939	1.48955
AT1G65640	DEGP4 (DEGP PROTEASE 4); serine-type peptidase/ trypsin	0.459457	0.271759	0.763461	2.66127	2.57543	1.44394	1.80098	2.9748	AT1G28330	DRM1 (DORMANCY-ASSOCIATED PROTEIN 1)	-0.626457	-0.431542	-0.327869	-0.37479	0.20717	-0.358676	-0.0902744	-1.0055
AT1G66060	hypothetical protein	-0.877503	-1.68123	-2.19948	-2.68294	0.256622	-0.656022	-0.659171	-0.99435	AT1G28700	hypothetical protein	-0.370899	-0.515591	-0.395886	-0.547425	-0.356975	-0.655008	-0.136974	-0.296632
AT1G66090	disease resistance protein (TIR-NBS class), putative	0.503938	0.675026	1.01101	0.854879	-0.266831	0.596125	-0.216957	0.198649	AT1G28960	ATNUDT15 (ARABIDOPSIS THALIANA NUDIX HYDROLASE HOMOLOG 15); hydrolase	0.137583	0.119564	0.134847	0.0577931	0.2083	0.308956	0.0686985	0.348045
AT1G66270	beta-glucosidase (PSR3)	0.391245	-0.351767	0.998551	0.116495	0.463369	0.876904	1.01256	0.352817	AT1G29020	calcium-binding EF hand family protein	0.63177	0.7929	1.11942	1.02713	0.399384	0.434994	0.594946	0.126603
AT1G66280	glycosyl hydrolase family 1 protein	-0.754676	-1.2024	-1.29468	-0.555273	-0.0390855	0.453414	0.279038	0.470298	AT1G29195	hypothetical protein	0.408308	0.484068	0.849217	1.04471	0.343325	0.423419	0.396606	0.493562
AT1G66500	zinc finger (C2H2-type) family protein	0.356722	0.573719	0.775874	1.29298	0.195978	0.165427	0.129819	0.430967	AT1G29370	kinase-related	-0.924503	-0.278194	-0.246096	-0.452879	-0.807979	-1.16357	-0.318964	-1.77587
AT1G66700	PXMT1; S-adenosylmethionine-dependent methyltransferase	-2.67949	-2.90331	-2.84898	-2.16704	-1.44737	0.169201	1.00747	2.27531	AT1G29540	hypothetical protein	-0.382811	-0.799245	-0.982691	-1.44191	-0.534843	-0.549104	-1.1859	-1.35775
AT1G67860	hypothetical protein	-0.614378	-0.31441	-0.848149	-1.51837	-0.220316	-1.04145	-1.23639	-1.61737	AT1G29720	protein kinase family protein	-0.406518	-0.673248	-0.859313	-1.48363	-0.813408	-0.267867	-0.465217	-0.66325
AT1G67865	hypothetical protein	-0.768426	-0.932094	-1.80472	-3.37357	-0.0517273	-1.21112	-1.73507	-2.01323	AT1G29730	kinase/ protein serine/threonine kinase	-0.418323	-0.361013	-1.06563	-1.45759	-0.732806	-0.514225	-0.543747	-0.807221
AT1G68290	ENDO 2 (ENDONUCLEASE 2); T/G mismatch-specific endonuclease/ endonuclease/ nucleic acid binding / single-stranded DNA specific endodeoxyribonuclease	2.83241	2.36151	5.1244	5.06588	0.264257	1.51892	1.99438	1.63613	AT1G29740	leucine-rich repeat family protein / protein kinase family protein	-0.397534	-0.356139	-0.754989	-1.00399	-0.617203	-0.790939	-0.837111	-1.22129
AT1G68620	hydrolase	-1.20483	-1.4663	-0.519139	-0.743367	-0.766842	0.041457	-0.381925	-0.0024539	AT1G29860	WRKY71 (WRKY DNA-binding protein 71); transcription factor	0.828672	0.717245	0.831287	0.73318	0.454433	0.588548	0.568422	1.05671
AT1G68800	BRC2/TCP12 (BRANCHED2); transcription factor	1.27757	1.51137	1.77009	1.50822	0.465866	0.181354	-0.139658	-0.117062	AT1G30220	ATINT2 (INOSITOL TRANSPORTER 2); carbohydrate transmembrane transporter/ sugar:hydrogen ion symporter	1.06255	0.858424	1.56619	1.62192	2.79575	2.47641	2.31945	2.38411
AT1G68810	basic helix-loop-helix (bHLH) family protein	-0.481644	-0.382621	-0.812277	-1.29583	0.0849128	-0.574807	-0.312714	-1.04654	AT1G30280	heat shock protein binding	-0.473458	-0.839255	-1.21062	-1.41327	-0.704114	-0.814927	-0.791958	-0.771729
AT1G68880	ATBZIP (ARABIDOPSIS THALIANA BASIC LEUCINE-ZIPPER 8); DNA binding / transcription factor	0.926371	0.822595	1.1972	1.41399	0.0190035	0.481614	0.446277	0.501018	AT1G30310	pseudo	0.680465	1.17212	1.61411	2.27618	2.54664	2.50921	2.26818	4.27921
AT1G69150	DC1 domain-containing protein	-1.3889	-1.49853	-1.76781	-1.04619	-0.413884	-0.519165	-0.804302	-0.608889	AT1G30370	lipase class 3 family protein	-0.537024	-0.623873	-1.02699	-1.98311	-0.336798	-0.495405	-0.70313	-1.03413
AT1G69720	HO3 (HEME OXYGENASE 3)	-0.923037	-0.731036	-1.23489	-2.26021	-0.248445	1.37484	0.957776	1.03815	AT1G30500	CCAAT-binding transcription factor (CBF-B/NF-YA) family protein	0.189009	0.133062	0.44784	0.554025	0.625353	0.936189	0.933893	1.07941
AT1G69730	protein kinase family protein	-0.321809	-0.467798	-0.620472	-1.07715	-0.214356	0.353315	-0.209127	0.183782	AT1G30510	ATRFNR2 (ROOT FNR 2); oxidoreductase	0.683557	0.789162	0.9498	1.02862	0.369282	0.716712	0.681491	0.675381
AT1G69920	ATGSTU12 (Arabidopsis thaliana Glutathione S-transferase (class tau) 12); glutathione transferase	-2.15505	-1.78132	-1.23635	-0.452003	-1.78978	-0.672851	0.405663	0.850116	AT1G30560	transporter, putative	1.8774	1.66147	2.00814	1.84269	1.90436	1.97923	1.53001	1.75687
AT1G70220	hypothetical protein	-0.131407	-0.41021	-0.77119	-1.23945	0.146819	-0.0341444	0.0885826	0.363634	AT1G30730	FAD-binding domain-containing protein	-0.11675	-0.0891759	-0.463896	-0.556461	-0.390719	-0.742311	-1.22736	-1.05641
AT1G70620	cyclin-related	-0.0395548	-0.122763	-0.600071	-0.183045	0.303384	0.208384	0.204013	0.56062	AT1G30760	FAD-binding domain-containing protein	0.713253	0.650014	1.16651	1.06533	0.44547	1.78362	1.93686	2.57844
AT1G70840	MLP31 (MLP-LIKE PROTEIN 31)	1.34939	0.463562	1.93787	0.797531	0.253854	0.891169	4.19142	0.308569	AT1G30840	ATPUP4 (Arabidopsis thaliana purine permease 4); purine transmembrane transporter	-0.464572	-0.338288	-0.789945	-1.33172	-0.375466	-0.465836	-0.253432	-0.7477
AT1G70850	MLP34 (MLP-LIKE PROTEIN 34)	-0.323782	-1.26462	-0.235245	-0.106533	0.129364	0.867061	0.319367	0.492787	AT1G30860	protein binding / zinc ion binding	-0.559452	-0.853125	-1.27613	-1.62089	-0.419556	-0.428915	-0.45536	-0.113669
AT1G70920	homeobox-leucine zipper protein, putative / HD-ZIP transcription factor, putative	-0.642116	-0.713189	-0.953156	-1.09429	0.102986	-0.187489	-0.244317	-0.365992	AT1G31173	misc_RNA	0.221889	0.482125	0.6171	1.05212	1.27231	0.884305	1.79446	0.64284
AT1G70990	proline-rich family protein	-0.373492	-0.553232	-0.987314	-1.06827	0.0498364	0.129999	-0.245117	-0.458305	AT1G31550	GDSL-motif lipase, putative	0.484133	0.426077	1.19725	1.22594	0.59742	0.614526	0.402229	0.767786
AT1G71300	Vps52/Sac2 family protein	0.289846	0.182778	0.158865	2.14345	2.10088	1.46381	1.09932	2.4321	AT1G31600	oxidoreductase, 2OG-Fe(II) oxygenase family protein	0.720044	0.937281	1.26149	1.54586	0.96948	1.02881	1.45161	1.57685
AT1G71530	protein kinase family protein	-0.199965	-0.540831	-1.00857	-1.43055	-0.460466	0.0568356	-0.471697	-0.257588	AT1G31670	copper amine oxidase, putative	1.74215	1.19973	1.30043	2.24826	1.79443	1.90441	1.4198	2.89855
AT1G72416	heat shock protein binding	-0.969553	-0.243727	-0.318462	0.137544	1.52736	-0.555933	0.663971	-0.368303	AT1G31690	copper ion binding	1.55196	1.28039	1.27363	1.11514	0.582793	1.28313	1.12646	1.63394
AT1G72540	protein kinase, putative	-0.437498	-0.63971	-1.0058	-1.45376	0.0728863	0.100833	-0.285996	-0.581951	AT1G32560	late embryogenesis abundant group 1 domain-containing protein / LEA group 1 domain-containing protein	2.01173	2.5109	1.7502	3.25138	1.85303	1.93134	2.17702	2.70961
AT1G72620	hydrolase, alpha/beta fold family protein	0.567592	0.686513	1.10957	1.28877	0.412948	-0.865921	-0.632798	-0.62174	AT1G32780	alcohol dehydrogenase, putative	-0.493946	-0.766286	-1.09788	-1.78981	-1.0712	-1.1899	-1.34011	-1.34886
AT1G73000	hypothetical protein	-0.482238	-0.892049	-1.82374	-1.75275	-0.275561	-0.719146	-1.8472	-1.25249	AT1G32920	hypothetical protein	0.349382	0.505772	0.951436	1.28056	0.526542	0.129389	0.22106	0.16012
AT1G73160	glycosyl transferase family 1 protein	-0.235396	-0.200083	-1.18628	-1.07534	-0.0960602	-0.144503	-0.0140769	-0.361628	AT1G33102	hypothetical protein	0.253862	0.505292	1.29832	1.84633	0.587254	0.314709	0.42206	0.244431
AT1G73300	SCPL2 (serine carboxypeptidase-like 2); serine carboxypeptidase	-0.167558	-0.561727	-0.437243	-0.34586	-0.0921199	0.240429	-0.421456	0.0428147	AT1G33170	dehydration-responsive family protein	-0.00500101	-0.180412	-0.606717	-1.21784	-0.407118	-0.446042	-0.383073	-0.55772
AT1G73330	ATDR4 (Arabidopsis thaliana drought-repressed 4)	-0.988443	-1.30521	-0.923045	-1.35297	-0.0651923	-0.347005	-0.893887	-1.103	AT1G33280	ANAC015 (Arabidopsis NAC domain containing protein 15); transcription factor	-0.465821	-0.528077	-1.04024	-1.30288	-0.476106	-0.243936	-0.15025	-0.351574
AT1G73480	hydrolase, alpha/beta fold family protein	1.93611	1.67413	2.08038	1.91172	1.21232	1.68094	1.39182	1.66424	AT1G33540	SCPL18 (serine carboxypeptidase-like 18); serine carboxypeptidase	-0.353717	-0.500083	-1.16919	-1.24624	-0.86254	-0.85667	-1.16122	-1.48955
AT1G74010	strictosidine synthase family protein	0.66656	0.847593	1.14753	1.1675	0.176248	0.16003	0.0143537	0.478835	AT1G33700	catalytic	-0.434955	-0.580394	-1.10063	-1.5853	-0.209808	-0.119074	-0.568799	-0.603418
AT1G74420	FUT3 (fucosyltransferase 3); fucosyltransferase/ transferase, transferring glycosyl groups	0.45745	0.667022	1.36788	1.21391	0.029449	0.327806	0.495664	0.753974	AT1G33840	hypothetical protein	-1.30165	-1.35012	-1.74504	-1.4238	-2.95478	-3.5224	-4.22966	-3.8027
AT1G74890	ARR15 (RESPONSE REGULATOR 15); transcription regulator	0.485434	0.650335	1.28857	1.38276	-0.735071	0.888777	1.0883	0.98925	AT1G33870	avirulence-responsive protein, putative / avirulence induced gene protein, putative / AIG protein, putative	-0.977796	-1.10437	-2.08795	-2.958	-2.11993	-2.04287	-3.01094	-3.75341
AT1G75030	ATLP-3 (Arabidopsis thaumatin-like protein 3)	-0.106419	-0.608267	-0.503395	-1.18164	-0.214276	0.168708	-0.270473	-0.174534	AT1G33880	avirulence-responsive family protein / avirulence induced gene (AIG1) family protein	-0.827379	-0.92146	-1.8637	-1.86247	-1.90967	-1.25285	-2.09032	-2.27627
AT1G75040	PR5 (PATHOGENESIS-RELATED GENE 5)	-0.82395	-1.2177	-1.42499	-1.84688	-1.08389	1.5584	1.77977	2.62296	AT1G33890	avirulence-responsive protein, putative / avirulence induced gene protein, putative / AIG protein, putative	-0.875259	-1.11369	-1.74887	-2.53084	-1.94313	-1.89341	-2.10672	-3.11253
AT1G75430	transcription factor	-0.534573	0.411509	-0.267902	0.467997	-0.528076	0.135722	0.547857	0.473414	AT1G34315	hypothetical protein	-1.03833	-0.962232	-1.17107	-1.30291	-0.510882	-0.622885	-0.415397	-0.672848
AT1G75920	family II extracellular lipase 5 (EXL5)	-0.450283	-0.375282	-0.498788	-0.630049	0.524254	-0.0265023	0.011438	-0.854963	AT1G34580	monosaccharide transporter, putative	1.08522	1.25346	1.65953	2.23923	1.20308	1.10242	1.48334	1.91921
AT1G76210	hypothetical protein	-0.918265	-2.79777	-1.1027	-1.41407	-0.564197	0.394027	-0.388495	-1.41177	AT1G35186	pseudo	-0.921868	-0.870323	-1.69356	-1.68075	-0.70416	-1.01392	-1.74502	-1.65465
AT1G76220	hypothetical protein	-0.200586	-0.811933	-1.12753	-1.05899	0.015508	0.194177	-0.412282	0.0813342	AT1G35230	AGP5 (ARABINOGALACTAN-PROTEIN 5)	0.188138	0.875431	1.01763	1.72254	0.29756	1.36957	1.23144	2.25476
AT1G76720	translation initiation factor	-0.23982	-0.218969	-0.450075	-0.308607	-0.159278	-0.13526	0.0130879	-0.151698	AT1G35310	MLP168 (MLP-LIKE PROTEIN 168)	1.0944	1.29794	2.07633	2.08064	0.535428	0.686524	0.276326	0.848641
AT1G77145	hypothetical protein	0.44556	0.765266	1.03245	0.778456	0.319676	0.043836	0.362665	-0.327864	AT1G35910	trehalose-6-phosphate phosphatase, putative	-0.633901	-0.872623	-1.3837	-2.28675	-1.62269	-1.6933	-2.108	-2.06398
AT1G77160	hypothetical protein	1.67242	2.20914	2.9563	2.45107	1.1691	0.917923	1.50398	0.84489	AT1G36060	AP2 domain-containing transcription factor, putative	-0.757118	-0.502204	-1.5278	-1.53818	-0.706302	-0.667594	-0.441857	-1.10306
AT1G77390	CYCA1;2 (CYCLIN A1;2); cyclin-dependent protein kinase regulator	0.359145	1.07003	1.16644	0.667963	-0.0975987	-0.0310411	0.0965746	-0.040307	AT1G36640	hypothetical protein	-1.46501	-1.1608	-1.21661	-0.82837	-0.711843	-1.28441	-1.18844	-1.4332
AT1G77490	TAPX; L-ascorbate peroxidase	-0.0469513	-0.336963	-0.820039	-1.42762	-0.124821	0.206662	-0.153743	0.193929	AT1G43160	RAP2 (related to AP2 6); DNA binding / transcription factor	-0.592655	-1.11964	-1.68408	-1.69106	-0.795453	-0.559422	-1.19298	-0.598652
AT1G77530	O-methyltransferase family 2 protein	-1.52477	-2.02707	-1.27773	-0.656215	-0.754061	-0.127089	-0.689321	-0.940543	AT1G43675	pseudo	-1.14036	-1.98372	-2.81628	-2.68564	-1.81951	-1.71467	-1.89398	-2.00398
AT1G78050	phosphoglycerate/bisphosphoglycerate mutase family protein	0.294472	0.658602	0.807416	0.776914	-0.206982	0.106044	0.0322782	0.119145	AT1G43800	acyl-(acyl-carrier-protein) desaturase, putative / stearoyl-ACP desaturase, putative	-1.14446	-0.663717	-0.845743	-0.881691	-0.726725	-1.1432	-0.270349	-1.80418
AT1G78230	protein binding	0.953498	0.716556	0.783848	0.39188	-0.63714	-0.19431	-0.638632	-0.302585	AT1G44050	DC1 domain-containing protein	-0.186619	-0.123079	-0.263351	-0.300596	-0.491127	-0.770388	-1.19802	-0.844162
AT1G78270	ATUGT85A4 (UDP-GLUCOSYL TRANSFERASE 85A4); UDP-glycosyltransferase/ glucuronosyltransferase/ transferase, transferring hexosyl groups	-0.550263	-0.884064	-1.3358	-1.40002	-0.0565901	-0.700409	-0.545859	-0.582248	AT1G45010	hypothetical protein	0.970069	0.845069	1.31533	1.42341	0.493643	0.549204	0.526314	0.509234
AT1G78320	ATGSTU23 (Arabidopsis thaliana Glutathione S-transferase (class tau) 23); glutathione transferase	-0.401546	-0.299712	-0.600001	-1.12233	-0.0817681	-0.199393	-0.422773	-0.589691	AT1G45191	glycosyl hydrolase family 1 protein	0.771191	0.829639	1.76486	2.39823	1.27578	0.824876	0.868052	1.40121
AT1G78340	ATGSTU22 (Arabidopsis thaliana Glutathione S-transferase (class tau) 22); glutathione transferase	0.445478	0.539829	1.12191	1.45742	-0.01716	1.08192	1.01406	1.48833	AT1G47600	glycosyl hydrolase family 1 protein	-0.465113	-0.815297	-1.59935	-1.99586	-0.86054	-0.088575	-0.745099	-0.519533
AT1G78500	pentacyclic triterpene synthase, putative	0.595398	0.2144	0.205936	1.12681	0.043157	0.532451	-0.257748	0.710893	AT1G47840	hexokinase, putative	-0.55398	-0.550267	-1.04132	-1.35948	-1.20152	-1.03911	-1.17774	-1.0358
AT1G79245	pseudo	-0.93419	0.210141	-0.165115	0.267692	0.19175	-0.363104	0.241481	-0.0684577	AT1G47960	C/VIF1 (CELL WALL / VACUOLAR INHIBITOR OF FRUCTOSIDASE 1); pectinesterase inhibitor	1.78807	1.68169	1.69923	2.5729	3.5607	3.65604	3.85928	3.88632
AT1G79480	hypothetical protein	-0.31121	-0.189509	-0.760326	-1.09272	0.159187	-0.0228707	-0.199202	-0.595435	AT1G47980	hypothetical protein	2.18055	2.41326	2.54691	2.50085	1.48341	1.94301	2.15874	3.30674
AT1G79680	wall-associated kinase, putative	-2.24803	-2.1003	-1.08649	-2.12232	-0.972341	-1.38945	-1.16867	0.0900939	AT1G47990	ATGA2OX4 (GIBBERELLIN 2-OXIDASE 4); gibberellin 2-beta-dioxygenase	0.635299	0.881159	0.819329	0.507455	0.659849	0.98226	1.02481	1.16136
AT1G79915	hypothetical protein	-0.647598	-0.857881	-1.57272	-1.82692	-0.5744	-0.156905	-0.0116697	-0.768056	AT1G48090	C2 domain-containing protein	0.189998	0.112913	-0.234937	-0.285236	0.14055	0.196274	-0.0653558	0.151755
AT1G80100	AHP6 (ARABIDOPSIS HISTIDINE PHOSPHOTRANSFER PROTEIN 6); transferase, transferring phosphorus-containing groups	-0.317147	-0.163499	-0.75477	-1.27888	-0.670731	-0.311783	0.0850719	-0.661476	AT1G48130	ATPER1 (Arabidopsis thaliana 1-cysteine peroxiredoxin 1); antioxidant	2.53828	2.77364	2.13406	5.67067	1.69155	3.40958	5.2088	6.30558
AT1G80470	hypothetical protein	1.99189	1.60734	0.947758	0.775443	0.0338903	2.5026	2.24448	3.14179	AT1G48325	Expressed protein	-1.43368	-1.25239	-2.07704	-2.73897	-0.593146	-1.88532	-2.44097	-3.06586
AT2G01275	zinc finger (C3HC4-type RING finger) family protein	-0.215379	-0.36049	-0.630517	-1.09119	-0.189312	0.176172	-0.248973	-0.242829	AT1G48470	GLN1;5 (GLUTAMINE SYNTHETASE 1;5); glutamate-ammonia ligase	0.895898	0.57427	0.628946	1.09333	0.464669	0.731574	0.68789	0.90748
AT2G01340	hypothetical protein	-0.361943	-0.467498	-0.520753	-1.02894	-0.184887	-0.193303	-0.135172	-0.221439	AT1G48500	JAZ4/TIFY6A (JASMONATE-ZIM-DOMAIN PROTEIN 4)	-1.1438	-1.13327	-1.21358	-1.22209	-1.00648	-1.47337	-1.6857	-1.45426
AT2G01360	hypothetical protein	-1.17157	-3.27659	-3.25592	-1.40833	-1.26642	-3.19935	-3.27642	-0.687642	AT1G48510	cytochrome c oxidase assembly protein surfeit-related	-0.586354	-0.403566	-1.29007	-1.39953	-0.523037	-0.655343	-0.392542	-1.04331
AT2G02010	GAD4 (GLUTAMATE DECARBOXYLASE 4); calmodulin binding	0.978738	1.09905	1.23843	1.16136	-0.97754	0.221109	0.361812	0.397991	AT1G48660	auxin-responsive GH3 family protein	1.01842	0.803656	0.758014	0.563828	0.699603	0.65368	0.371136	0.563999
AT2G02240	MEE66 (maternal effect embryo arrest 66)	0.693912	0.860498	1.11249	1.029	0.489079	0.599018	0.505538	0.0595644	AT1G48670	auxin-responsive GH3 family protein	1.08518	1.20905	1.42635	1.32877	0.154709	0.701401	0.512682	1.17448
AT2G02250	ATPP2-B2 (Phloem protein 2-B2); carbohydrate binding	0.99929	0.913831	1.02885	0.820239	0.182576	1.1215	0.718877	1.10905	AT1G48700	oxidoreductase, acting on paired donors, with incorporation or reduction of molecular oxygen, 2-oxoglutarate as one donor, and incorporation of one atom each of oxygen into both donors	2.12868	2.05817	2.20638	2.26312	2.09238	2.70379	2.41442	2.77088
AT2G02820	MYB88 (myb domain protein 88); DNA binding / transcription factor	-0.00990397	-0.223744	-0.466154	-1.24107	-0.21761	0.0334807	-0.374835	-0.492587	AT1G49160	WNK7 (Arabidopsis WNK kinase 7); kinase	0.977316	0.904177	1.09171	0.834667	0.521253	0.830139	0.862696	0.912
AT2G02990	RNS1 (RIBONUCLEASE 1); endoribonuclease	1.27349	0.0971825	2.56098	2.77325	-0.924015	0.70132	-0.23396	0.579336	AT1G49230	zinc finger (C3HC4-type RING finger) family protein	-0.64546	-0.506331	-0.762045	-1.52936	-0.423225	-0.690231	-0.515123	-1.32485
AT2G03020	heat shock protein-related	0.325348	0.862487	1.41431	0.935568	0.234945	0.0969681	0.452639	0.325324	AT1G49390	oxidoreductase, 2OG-Fe(II) oxygenase family protein	-0.38747	-0.505126	-0.815644	-1.32931	-0.494914	-0.442859	-0.761473	-0.828035
AT2G04033	pseudo	1.74707	1.34028	1.69273	1.30647	1.05382	0.174372	-0.538555	-0.984331	AT1G49450	transducin family protein / WD-40 repeat family protein	-0.922357	-1.23814	-1.85303	-2.37982	-0.386467	-0.188986	-0.951358	-1.03598
AT2G04480	hypothetical protein	-1.1153	-0.479122	-0.843006	-0.709111	-0.346591	-1.01536	0.423674	-2.06804	AT1G50630	hypothetical protein	0.563312	0.648716	1.01825	1.11225	0.398733	0.523359	0.402391	0.439305
AT2G04500	DC1 domain-containing protein	-1.14562	-1.46688	-1.2373	-1.7192	-0.07601	0.268707	0.456004	0.127807	AT1G50830	hypothetical protein	1.12092	0.538368	0.746585	0.557134	0.346592	0.953849	0.733655	1.25513
AT2G04925	hypothetical protein	1.41525	1.33842	1.57439	0.992572	1.15386	0.660066	-0.447414	0.0552372	AT1G50960	ATGA2OX7 (GIBBERELLIN 2-OXIDASE 7); gibberellin 2-beta-dioxygenase/ gibberellin 20-oxidase	1.7865	1.28763	1.77009	3.10577	1.50091	1.38555	1.07649	1.19528
AT2G05330	speckle-type POZ protein-related	-0.899823	-0.548352	-1.17487	-1.83744	-0.0995581	-0.61683	-0.292165	-1.23539	AT1G51030	hypothetical protein	1.39302	1.22814	1.30553	1.35891	1.42442	1.09624	1.12498	1.47577
AT2G05430	hypothetical protein	1.48658	1.48945	2.18741	1.14386	0.756414	1.4282	0.755407	-0.0322369	AT1G51090	heavy-metal-associated domain-containing protein	0.903699	0.934381	1.30096	1.38568	0.877442	0.926908	0.797509	1.10001
AT2G05540	glycine-rich protein	-0.76342	-1.15106	-1.17029	-0.983687	0.448398	0.274952	-0.151587	-0.508993	AT1G51140	basic helix-loop-helix (bHLH) family protein	1.07294	1.00132	1.11896	1.01548	1.13091	1.5929	1.39927	1.68568
AT2G05580	pseudo	-0.582738	-0.595536	-0.578973	-0.0528044	0.291485	-0.593379	0.177544	-0.571677	AT1G51620	protein kinase family protein	0.709701	1.28786	1.78265	1.73098	0.14127	0.614988	0.431155	0.721429
AT2G07140	F-box family protein	-1.4561	-1.82061	-2.54278	-0.448505	0.779287	-0.0460364	-0.05733	0.657477	AT1G51802	pseudo	-1.41078	-2.08008	-2.66328	-2.80653	-1.02238	-1.15252	-1.60013	-1.76838
AT2G07180	protein kinase, putative	-0.300014	-0.37847	-0.488155	-1.03873	-0.405959	0.0744626	-0.0561198	-0.210393	AT1G51805	leucine-rich repeat protein kinase, putative	-0.189624	-0.362304	-0.112831	-0.165698	0.191188	-0.128956	0.0144056	-0.0265768
AT2G07600	pseudo	-0.55544	-0.315312	-1.16188	-1.05928	-0.339038	-0.468464	0.161802	-0.663605	AT1G51830	ATP binding / kinase/ protein serine/threonine kinase	0.918667	1.46175	2.1374	2.7283	0.659222	2.58133	2.86416	4.17646
AT2G12465	LCR50 (Low-molecular-weight cysteine-rich 50)	3.52742	3.10419	3.30317	2.82022	2.35547	2.3612	1.37845	0.0269542	AT1G51840	protein kinase-related	1.72638	2.09828	2.41084	2.65671	1.96043	2.92217	2.8235	3.80932
AT2G12650	pseudo	-1.44611	-1.41302	-1.3994	-1.4133	-1.3056	-1.39956	-1.39559	-1.36406	AT1G51890	leucine-rich repeat protein kinase, putative	-0.906432	-0.72878	-0.610885	-0.342145	-0.698498	-0.965613	-1.16179	-0.666283
AT2G13800	ATSERK5 (SOMATIC EMBRYOGENESIS RECEPTOR LIKE KINASE 5); ATP binding / protein kinase/ transmembrane receptor protein serine/threonine kinase	0.0655624	0.263021	0.283532	1.22213	0.767696	0.389299	0.313257	1.06523	AT1G51915	cryptdin protein-related	-2.407	-2.41048	-1.86062	-1.5992	-1.86816	-2.37884	-1.64224	-1.67468
AT2G14095	hypothetical protein	-0.167906	-0.447989	-0.943664	-1.60185	-0.412767	-0.104894	-0.614798	-0.510953	AT1G52000	jacalin lectin family protein	1.36576	1.93123	3.33296	3.54416	1.61093	2.12179	2.55083	3.31464
AT2G14247	Expressed protein	1.08191	1.73524	1.64923	2.22017	0.214337	-0.579048	-0.564253	-0.80992	AT1G52030	MBP2 (MYROSINASE-BINDING PROTEIN 2)	0.880014	1.96388	4.48712	5.04278	1.11492	0.957716	1.33995	2.69693
AT2G15080	disease resistance family protein	-0.0500859	-0.22694	-0.895671	-1.5469	-0.80749	0.315276	-0.280564	-0.118089	AT1G52040	MBP1 (MYROSINASE-BINDING PROTEIN 1)	1.97889	3.45369	5.62946	5.49453	0.466982	2.0894	2.68405	3.75231
AT2G15880	leucine-rich repeat family protein / extensin family protein	-1.41146	-0.969858	-1.09753	-0.439204	-1.02456	-0.760864	-1.94497	-1.4404	AT1G52050	jacalin lectin family protein	-0.833235	-0.939566	-1.73804	-2.09388	-0.725129	-0.808275	-0.89182	-1.26294
AT2G16060	AHB1 (ARABIDOPSIS HEMOGLOBIN 1)	0.469082	0.993053	1.06382	0.704871	0.0280008	0.00546849	0.246457	-0.4533	AT1G52060	hypothetical protein	-0.167168	-0.272138	-1.04908	-0.954722	-0.588052	-0.131578	-0.256125	0.278972
AT2G16230	glycosyl hydrolase family 17 protein	-0.387456	-0.266134	-1.56623	-2.00757	-0.613291	-0.108508	-0.00285737	-0.237658	AT1G52190	proton-dependent oligopeptide transport (POT) family protein	-0.22905	-0.328474	-0.514419	-0.84566	-0.537662	-0.782147	-0.898167	-1.28803
AT2G16520	hypothetical protein	2.55245	1.9938	1.99816	2.60218	0.889123	2.23647	0.976624	0.365317	AT1G52342	hypothetical protein	0.650199	0.14015	0.333477	0.390062	0.464526	1.13916	0.43269	0.660299
AT2G16980	tetracycline transporter	-0.206683	-1.00568	-1.32568	-2.28636	-0.499942	0.0205769	-0.813271	-0.643403	AT1G52400	BGL1 (BETA-GLUCOSIDASE HOMOLOG 1); hydrolase, hydrolyzing O-glycosyl compounds	1.1009	1.33851	2.97866	2.80797	0.468475	0.7182	0.87271	1.07021
AT2G17470	hypothetical protein	0.494788	0.632153	1.36489	2.05804	0.22889	0.140297	0.714409	1.3291	AT1G52410	TSA1 (TSK-ASSOCIATING PROTEIN 1)	0.6054	0.990989	2.57375	2.45935	0.688829	0.658407	0.880903	0.677697
AT2G17590	DC1 domain-containing protein	-0.371086	-0.847675	-1.54592	-2.13374	-0.385937	0.101621	-0.339066	-0.595887	AT1G52560	26 kDa class I small heat shock protein-like (HSP26-P)	1.40539	1.04236	0.858583	0.136359	1.49906	1.59131	1.61904	1.6075
AT2G18470	protein kinase family protein	0.507466	1.68872	1.4147	0.565106	1.05592	0.743239	2.26171	0.523419	AT1G52690	late embryogenesis abundant protein, putative / LEA protein, putative	0.770355	0.918505	1.72824	2.58754	3.32312	3.41109	3.29671	3.49773
AT2G18490	zinc finger (C2H2 type) family protein	1.56725	1.73914	2.68459	3.19247	1.23107	1.63336	1.78001	2.36432	AT1G52750	hydrolase, alpha/beta fold family protein	-0.219336	-0.348601	-0.752648	-1.11513	-0.0694513	-0.073021	-0.488157	-0.58161
AT2G19660	DC1 domain-containing protein	-0.262725	-0.40247	-1.32327	-1.72035	-0.508248	-0.135813	-0.219913	-0.51398	AT1G52820	2-oxoglutarate-dependent dioxygenase, putative	-3.04321	-4.05805	-5.13345	-4.56	-2.42943	-3.28785	-4.3328	-3.40582
AT2G19803	pseudo	-1.20777	-0.63306	-1.86405	-1.87929	-0.136049	-0.846641	-0.527259	-0.675169	AT1G52827	hypothetical protein	1.13525	1.08041	1.52777	1.65487	0.832092	1.31613	0.904312	0.804962
AT2G20080	hypothetical protein	-0.929122	-2.2562	-1.69471	-1.6768	-0.961261	0.267949	-0.770914	-0.802433	AT1G52855	hypothetical protein	0.672542	0.309409	1.02365	1.43775	0.514751	0.293657	0.200702	0.171612
AT2G20500	hypothetical protein	-0.182696	-0.286185	-0.730256	-1.40899	-0.141366	-0.115314	-0.467658	-0.54242	AT1G52890	ANAC019 (Arabidopsis NAC domain containing protein 19); transcription factor	1.24385	0.96263	1.93354	1.99808	1.59837	1.59094	1.32778	1.58224
AT2G20515	hypothetical protein	-0.377879	-0.296136	-1.1061	-1.15341	-0.100005	-0.130868	0.19369	-0.32627	AT1G52990	thioredoxin family protein	0.483865	-0.522626	1.35908	-0.623174	-0.139495	0.448972	0.539248	-0.452355
AT2G20520	FLA6	-0.554332	-1.84962	-2.6378	-2.89271	0.00868948	0.0704816	-0.942562	-0.586041	AT1G53080	legume lectin family protein	1.56271	1.40294	2.39656	2.30119	1.43065	2.92442	2.60822	3.58176
AT2G20550	DNAJ chaperone C-terminal domain-containing protein	-0.536417	-0.625273	-0.8714	-1.36113	0.0371198	-0.38767	-0.468162	-0.544168	AT1G53100	acetylglucosaminyltransferase	0.60637	0.382637	0.44855	0.357596	1.63191	1.54008	1.43511	1.5704
AT2G20630	protein phosphatase 2C, putative / PP2C, putative	0.156759	0.16871	0.37237	0.356624	0.000175561	0.225366	0.130833	0.219553	AT1G53130	stigma-specific Stig1 family protein	1.44039	1.60635	1.12845	1.23638	0.69554	0.38597	0.637138	0.468797
AT2G20720	pentatricopeptide (PPR) repeat-containing protein	-0.533538	-0.865731	-1.51382	-2.1593	-0.383339	-0.0845375	0.0841084	-0.221931	AT1G53160	SPL4 (SQUAMOSA PROMOTER BINDING PROTEIN-LIKE 4); DNA binding	1.35712	1.76429	1.89049	1.77487	0.941771	0.833382	0.939068	1.05634
AT2G21210	auxin-responsive protein, putative	1.03149	0.59873	0.979131	1.06698	-0.200191	0.408027	0.250252	0.495721	AT1G53480	hypothetical protein	-2.10402	-0.520398	-0.439095	-1.08869	-2.802	-2.44346	-1.46763	-2.64207
AT2G21260	mannose 6-phosphate reductase (NADPH-dependent), putative	0.382966	0.316781	0.72397	2.41296	2.33761	1.39965	1.03273	2.49668	AT1G53542	hypothetical protein	0.400177	0.427241	0.762464	1.0916	0.12002	0.16519	0.64626	0.455173
AT2G21350	hypothetical protein	1.5171	0.524463	1.04965	2.32876	1.40674	0.858582	1.16494	1.89234	AT1G53690	DNA-directed RNA polymerases I, II, and III 7 kDa subunit, putative	2.65762	2.67513	3.49931	2.77891	2.18686	2.4815	2.31018	2.19476
AT2G22200	AP2 domain-containing transcription factor	1.11317	0.751473	1.08996	1.04653	0.200434	0.829835	0.60508	1.20803	AT1G53980	polyubiquitin-related	-0.621134	-0.617077	-0.81262	-1.53947	-0.823062	-0.990794	-0.972124	-1.20334
AT2G22590	glycosyltransferase family protein	-1.73654	-1.23213	-0.914706	-1.19083	0.592125	-0.0356482	0.031232	-0.0210524	AT1G53990	GLIP3 (GDSL-motif lipase 3); carboxylesterase/ lipase	-1.65396	-1.65226	-2.51539	-2.82684	-1.00374	-1.40584	-1.32373	-1.99157
AT2G22821	misc_RNA	0.0625622	0.513167	1.06759	1.52395	0.287339	-0.274692	0.113644	-0.0836693	AT1G54000	myrosinase-associated protein, putative	-0.487082	-0.735076	-0.856634	-0.479756	-0.257852	0.101732	0.0670639	0.399805
AT2G23096	oxidoreductase, 2OG-Fe(II) oxygenase family protein	0.846958	1.80742	1.66753	1.91705	1.37625	1.652	1.18566	0.198816	AT1G54020	myrosinase-associated protein, putative	0.0554692	1.30497	4.45899	4.63175	0.281754	-0.365765	0.0585716	-0.313078
AT2G23270	hypothetical protein	-3.38095	-4.09157	-4.31556	-4.0518	-0.108741	-0.914913	0.427746	-1.4381	AT1G54040	ESP (EPITHIOSPECIFIER PROTEIN)	0.88834	0.932564	1.75458	1.61152	0.759031	0.748128	0.866061	0.877123
AT2G23400	dehydrodolichyl diphosphate synthase, putative / DEDOL-PP synthase, putative	0.858331	1.56658	2.7811	0.832561	1.02894	-0.617938	-0.630768	0.444862	AT1G54575	hypothetical protein	0.272792	0.600188	0.909223	1.13063	0.522109	0.397929	0.425557	0.356939
AT2G23410	ACPT (ARABIDOPSIS CIS-PRENYLTRANSFERASE); dehydrodolichyl diphosphate synthase	-0.6389	-0.814919	-1.7587	-2.11094	-1.31947	-0.339324	-0.722241	-1.57112	AT1G54660	pseudo	-0.426962	-0.152151	-1.00457	-1.41034	-0.214597	-0.695236	-0.340704	-1.08958
AT2G24010	SCPL23 (serine carboxypeptidase-like 23); serine carboxypeptidase	0.469197	0.707668	1.12723	1.02646	0.567377	0.351146	0.195554	0.216988	AT1G54710	AtATG18h (Arabidopsis thaliana homolog of yeast autophagy 18 (ATG18) h)	-0.327613	-0.387951	-0.573121	-1.06449	-0.832572	-0.552444	-0.689003	-1.22075
AT2G24070	hypothetical protein	-0.177973	-0.262971	-0.732999	-1.38234	-0.143128	-0.0392199	0.0302877	-0.194692	AT1G54740	hypothetical protein	-0.409356	-0.484617	-0.718307	-1.05717	-0.252831	-0.247064	-0.610947	-0.747174
AT2G24545	miscRNA	-0.19807	-0.42138	-0.810615	-1.15267	0.0267986	0.0863613	-0.101896	0.0691817	AT1G54890	late embryogenesis abundant protein-related / LEA protein-related	-0.639952	-0.478502	-1.30664	-1.56974	-0.351884	-0.907	-0.590914	-1.27119
AT2G24762	ATGDU4 (ARABIDOPSIS THALIANA GLUTAMINE DUMPER 4)	0.448422	0.743488	1.13275	1.37361	0.631683	0.0493359	0.708888	-0.25549	AT1G55010	PDF1 (plant defensin 1)	1.27055	1.22795	1.34802	1.22941	0.157835	1.0268	1.27998	0.646624
AT2G25160	CYP82F1 (cytochrome P450, family 82, subfamily F, polypeptide 1); oxygen binding	-1.23203	-2.61039	-2.07781	-1.18814	-0.982924	0.037009	-0.884155	-0.596752	AT1G55020	LOX1 (Lipoxygenase 1); lipoxygenase	-1.03783	-0.788927	-0.535043	-0.402305	-0.773205	-1.02244	-1.23729	-0.956004
AT2G25590	agenet domain-containing protein	-0.521499	-0.65667	-1.19828	-1.24314	0.0162864	0.140606	0.325861	-0.0721978	AT1G55040	zinc finger (Ran-binding) family protein	0.237572	0.215163	0.227304	0.712636	0.347671	0.277938	0.646796	1.18637
AT2G25980	jacalin lectin family protein	-0.243973	-0.433816	-1.23826	-1.41984	-0.120068	0.111888	0.156528	-0.0469579	AT1G55265	hypothetical protein	0.664474	0.533631	0.820658	1.28631	0.997625	0.838073	0.835792	1.13965
AT2G26370	MD-2-related lipid recognition domain-containing protein / ML domain-containing protein	0.54728	0.250926	1.08546	0.908074	0.146866	0.618998	0.128818	0.261107	AT1G55380	DC1 domain-containing protein	-0.783529	-0.872337	-1.7796	-2.03762	-0.644981	-0.838864	-1.036	-1.26381
AT2G26400	ARD/ATARD3 (ACIREDUCTONE DIOXYGENASE); acireductone dioxygenase [iron(II)-requiring]/ heteroglycan binding / metal ion binding	0.792522	1.29988	0.520063	0.543763	-0.321986	2.1353	1.58222	1.67776	AT1G55440	DC1 domain-containing protein	-0.346208	-0.0834454	-0.838907	-1.19758	-0.921416	-0.969085	-0.888833	-1.76945
AT2G26420	PIP5K3; 1-phosphatidylinositol-4-phosphate 5-kinase	-0.156046	-0.340326	-0.966951	-1.11671	-0.231924	0.146588	-0.162767	-0.212585	AT1G55525	misc_RNA	0.388993	2.46361	3.31221	4.68372	0.711627	3.14289	2.75757	1.1734
AT2G26692	misc_RNA	0.856475	0.815831	1.43018	1.24348	-0.0526741	0.992986	0.649852	-0.36798	AT1G55860	UPL1 (UBIQUITIN-PROTEIN LIGASE 1); ubiquitin-protein ligase	-0.586687	-0.175629	-0.618613	-0.909442	-0.801183	-0.827822	-0.416784	-1.16046
AT2G27035	plastocyanin-like domain-containing protein	-0.258078	-0.288307	-0.67243	-1.12143	0.0716838	-0.166751	-0.564297	-0.726893	AT1G55920	AtSerat2;1 (SERINE ACETYLTRANSFERASE 1)	0.332487	0.564607	0.746647	1.10175	0.525645	0.681616	0.737858	1.17173
AT2G27930	zinc-binding family protein	-0.262721	-0.203163	-1.50988	-0.455232	0.617245	0.280944	0.030813	0.232281	AT1G56060	hypothetical protein	0.699304	1.01272	2.10752	2.2261	0.377717	1.30531	1.0567	1.4796
AT2G28040	aspartyl protease family protein	-0.35184	-0.463453	-1.17389	-1.61275	-0.143033	0.362115	0.435891	0.458266	AT1G56150	auxin-responsive family protein	0.806042	0.321767	0.866061	0.98911	0.549545	1.07518	0.716337	0.548249
AT2G28210	carbonic anhydrase family protein	0.442699	0.543058	1.1146	1.09554	0.499831	-0.20666	-0.610687	-0.19553	AT1G56170	HAP5B (Heme activator protein (yeast) homolog 5B); DNA binding / transcription factor	0.886276	0.911753	1.18634	1.26608	1.12149	1.52718	1.67104	1.95931
AT2G28420	lactoylglutathione lyase family protein / glyoxalase I family protein	0.332111	0.416495	0.549484	1.10301	0.286108	0.134888	0.64978	0.407105	AT1G56240	ATPP2-B13 (Phloem protein 2-B13); carbohydrate binding	-1.5235	-1.66594	-0.998533	-0.798484	-0.461028	-0.533145	-0.272017	-0.65991
AT2G28610	PRS (PRESSED FLOWER); transcription factor	1.45717	1.7095	1.98111	1.84632	0.86729	2.05939	1.66209	1.20729	AT1G56580	hypothetical protein	0.597744	0.649495	1.10467	0.835894	0.429088	0.418917	0.377483	0.483953
AT2G28860	CYP710A4 (cytochrome P450, family 710, subfamily A, polypeptide 4); oxygen binding	3.12557	1.66128	3.21971	3.45358	1.30914	2.4931	0.461453	2.12694	AT1G56600	ATGOLS2 (ARABIDOPSIS THALIANA GALACTINOL SYNTHASE 2); transferase, transferring glycosyl groups / transferase, transferring hexosyl groups	2.69702	1.75417	2.56604	3.11037	2.91072	3.12944	2.92237	4.13831
AT2G29130	LAC2 (laccase 2); copper ion binding / oxidoreductase	-1.33142	-1.103	-1.07003	-2.2742	0.124002	-0.979821	-0.337818	-2.20281	AT1G56650	PAP1 (PRODUCTION OF ANTHOCYANIN PIGMENT 1); DNA binding / transcription factor	1.38294	1.84415	3.18198	3.42568	1.25152	1.75942	2.26184	3.00565
AT2G29170	short-chain dehydrogenase/reductase (SDR) family protein / tropinone reductase, putative	-0.812182	-1.2156	-1.46762	-1.42815	0.0424883	-0.452454	-0.530853	-0.598489	AT1G57560	AtMYB50 (myb domain protein 50); DNA binding / transcription factor	-0.568383	-0.92116	-1.03158	-1.28787	-0.726467	-0.513539	-1.10347	-1.01656
AT2G29290	tropinone reductase, putative / tropine dehydrogenase, putative	-0.359734	-0.634569	-0.778113	-1.03693	0.457331	0.374076	0.0535015	-0.11344	AT1G57570	jacalin lectin family protein	-0.453897	-0.752269	-1.26444	-1.7434	-0.846932	-0.622098	-1.22286	-1.37926
AT2G29870	major intrinsic family protein / MIP family protein	1.16651	1.26329	1.7369	1.81214	0.186254	0.622346	0.621552	0.419146	AT1G57670	Toll-Interleukin-Resistance (TIR) domain-containing protein	-0.377185	-0.579191	-0.555427	-1.26638	-0.178809	-0.277121	-0.608426	-0.483664
AT2G30300	nodulin-related	1.14718	1.21822	1.65191	0.679616	0.0633916	0.151456	0.0684009	-1.6543	AT1G58120	hypothetical protein	-1.29742	-2.06787	-1.39246	-1.73752	-1.65289	-1.48743	-2.06813	-2.17457
AT2G30432	TCL1 (TRICHOMELESS1); DNA binding	-0.38321	-0.871765	-1.0508	-0.951873	0.121439	-0.657611	-0.905374	-0.743305	AT1G58130	pseudo	-1.20534	-1.65837	-1.66011	-1.57196	-1.80048	-1.07429	-1.69862	-1.21323
AT2G30540	glutaredoxin family protein	0.272379	0.133468	0.683247	1.20456	-0.165934	0.698313	0.81516	0.693201	AT1G58270	ZW9	0.510682	0.093448	0.29878	0.315807	0.734859	1.35868	1.11162	1.12642
AT2G30670	tropinone reductase, putative / tropine dehydrogenase, putative	0.511501	0.842976	1.23901	1.70104	-0.815384	-0.222712	0.256563	0.376462	AT1G58360	AAP1 (AMINO ACID PERMEASE 1); amino acid transmembrane transporter	0.743714	1.10199	1.37195	1.50538	0.819902	1.19182	1.05046	1.42485
AT2G30750	CYP71A12 (CYTOCHROME P450, FAMILY 71, SUBFAMILY A, POLYPEPTIDE 12); oxygen binding	-4.29439	-3.57742	-3.30162	-2.9468	-2.38879	-1.48889	-0.562057	-0.0984301	AT1G58370	RXF12; hydrolase, hydrolyzing O-glycosyl compounds	-0.915454	-1.12057	-2.00653	-2.20725	-1.15401	-0.908253	-1.34844	-1.10937
AT2G30766	hypothetical protein	1.91543	2.91776	2.96691	3.18239	0.981432	-1.01555	-2.0386	-0.847937	AT1G58410	disease resistance protein (CC-NBS-LRR class), putative	-0.695301	-0.559126	-0.756764	-0.707585	-0.866698	-1.17059	-1.19903	-1.22757
AT2G30770	CYP71A13 (CYTOCHROME P450, FAMILY 71, SUBFAMILY A, POLYPEPTIDE 13); indoleacetaldoxime dehydratase/ oxygen binding	-3.7025	-1.9665	-3.50088	-1.87966	-3.72544	1.26404	1.67343	3.92016	AT1G58643	hypothetical protein	-0.383447	-0.782316	-1.36056	-2.39323	-1.08927	-1.30492	-1.80672	-2.36007
AT2G31110	hypothetical protein	-0.550001	-0.648473	-0.910315	-1.07565	0.105659	-0.313803	-0.376541	-0.423646	AT1G59171	hypothetical protein	-0.0988919	-0.107359	-0.136853	0.0628089	-0.153959	0.0369276	-0.153965	-0.1234
AT2G31230	ATERF15 (ETHYLENE-RESPONSIVE ELEMENT BINDING FACTOR 15); DNA binding / transcription activator/ transcription factor	-0.224735	-0.505404	-1.06668	-1.38155	0.0397614	-0.109096	-0.307766	-0.195077	AT1G59700	ATGSTU16 (Arabidopsis thaliana Glutathione S-transferase (class tau) 16); glutathione transferase	0.452873	0.306693	0.922863	1.12126	0.551533	0.577443	0.380356	0.654364
AT2G31560	hypothetical protein	0.979044	0.893591	1.2212	1.11722	0.0460045	0.258259	0.0472966	0.103028	AT1G59780	disease resistance protein (CC-NBS-LRR class), putative	-1.0138	-1.0729	-1.87118	-2.28056	-0.819641	-0.800741	-0.862723	-1.12945
AT2G32150	haloacid dehalogenase-like hydrolase family protein	-0.496352	-0.754	-0.624419	-1.14561	-0.286581	-0.0176082	-0.664176	-0.816742	AT1G59940	ARR3 (RESPONSE REGULATOR 3); transcription regulator/ two-component response regulator	-1.01615	-1.3944	-2.09733	-2.25777	-0.840095	-0.634941	-1.17873	-1.44606
AT2G32160	hypothetical protein	-0.632137	-1.10406	-2.1183	-3.00562	0.146473	-0.527648	-1.73512	-1.53705	AT1G60095	jacalin lectin family protein	-0.332033	-0.355898	-0.562138	-0.949108	-0.830596	-0.745742	-1.12977	-0.943299
AT2G32220	60S ribosomal protein L27 (RPL27A)	0.141288	0.380838	0.682692	1.01371	0.123084	0.0447716	0.554941	0.393457	AT1G60190	armadillo/beta-catenin repeat family protein / U-box domain-containing protein	2.15125	1.36624	2.26455	3.132	1.57963	1.83294	1.49149	1.58391
AT2G32280	hypothetical protein	0.293235	0.437364	0.877359	1.02238	0.318484	0.13261	0.379507	0.177699	AT1G60470	ATGOLS4 (ARABIDOPSIS THALIANA GALACTINOL SYNTHASE 4); transferase, transferring glycosyl groups / transferase, transferring hexosyl groups	1.20503	1.24803	2.87273	3.80641	1.64117	2.94043	2.55667	2.68201
AT2G32550	rcd1-like cell differentiation family protein	0.377016	0.474535	0.75311	1.01983	0.601148	0.143048	0.309529	0.617956	AT1G60590	polygalacturonase, putative / pectinase, putative	1.43319	0.844907	0.707426	0.386964	0.281211	0.919503	0.588737	0.524963
AT2G32610	ATCSLB01 (Cellulose synthase-like B1); transferase/ transferase, transferring glycosyl groups	-0.64743	-0.742646	-1.20218	-0.679323	-0.269893	-0.201649	-0.575136	0.150686	AT1G60740	peroxiredoxin type 2, putative	0.362099	1.07968	1.86191	2.73866	1.32931	0.412422	0.671729	1.67926
AT2G32620	ATCSLB02 (Cellulose synthase-like B2); transferase/ transferase, transferring glycosyl groups	-0.717366	-0.915632	-1.80131	-1.65004	-0.131731	-0.0196274	-0.450311	-0.0749426	AT1G61130	SCPL32; serine carboxypeptidase	-1.29626	-1.34964	-2.6966	-4.08531	-2.29102	-2.90351	-4.07197	-5.01482
AT2G32660	disease resistance family protein / LRR family protein	0.58282	1.07869	0.927667	0.563163	0.396682	-0.114926	0.301474	0.344495	AT1G61340	F-box family protein	0.163275	0.279421	0.838514	1.01958	0.208977	0.419862	0.495588	0.274624
AT2G32680	disease resistance family protein	1.14947	1.69144	1.23586	0.784782	-0.66816	1.96188	0.964238	2.02191	AT1G61360	S-locus lectin protein kinase family protein	-0.429316	-0.388269	-0.65293	-1.20304	-0.668435	-0.588217	-0.833626	-0.638791
AT2G32690	pseudo	0.459131	0.437086	0.678787	0.560621	0.0801474	0.228765	0.146747	0.211639	AT1G61550	S-locus protein kinase, putative	-0.844198	-0.645848	-0.912704	-1.1725	-0.858155	-1.06252	-0.982165	-0.681503
AT2G32830	PHT5 (phosphate transporter 5); inorganic phosphate transmembrane transporter/ phosphate transmembrane transporter	0.665428	0.775864	1.45709	1.98164	-0.0354891	0.346228	0.38229	0.695542	AT1G61575	ATP binding / protein kinase	-0.911612	-0.991479	-1.37108	-1.96337	-0.427017	-1.38716	-1.41471	-1.9757
AT2G32885	hypothetical protein	0.617862	1.60452	0.873387	1.46428	1.33039	1.49727	0.913902	0.389982	AT1G61810	BGLU45; hydrolase, hydrolyzing O-glycosyl compounds	1.95605	1.25769	2.72608	2.78412	2.73597	2.82597	2.56369	2.48779
AT2G33080	leucine-rich repeat family protein	1.1001	2.15521	2.04805	2.19636	1.09714	3.23051	2.19014	3.15149	AT1G61840	DC1 domain-containing protein	0.58298	0.554685	1.68104	2.07307	0.951033	1.75879	1.5511	1.67825
AT2G33205	TMS membrane family protein / tumour differentially expressed (TDE) family protein	-0.0487953	-0.530592	-0.619769	-1.04762	-0.184063	0.116767	-0.169505	-0.255484	AT1G61860	protein kinase, putative	-0.367654	-0.0922018	-0.401449	-0.123696	-0.0589271	-0.171923	0.119376	-1.01715
AT2G33260	tryptophan/tyrosine permease family protein	-0.170261	-0.341761	-1.01828	-1.22178	-0.207505	0.121316	0.340244	0.402321	AT1G61930	hypothetical protein	0.407288	0.383879	0.501016	0.829967	0.34672	0.484418	0.292187	1.17516
AT2G33830	dormancy/auxin associated family protein	0.0949052	-0.216305	-0.290711	-0.488189	0.413168	0.196084	0.261814	0.163617	AT1G62225	hypothetical protein	1.99112	2.38397	2.45841	2.27821	3.31154	2.92223	3.76581	2.34894
AT2G34090	MEE18 (maternal effect embryo arrest 18)	0.69368	0.990331	1.43211	1.34618	-0.1226	-0.301735	-0.0947654	-0.660863	AT1G62290	aspartyl protease family protein	0.381565	0.559327	0.91699	1.07424	1.07657	1.27081	1.29535	2.00502
AT2G34390	NIP2;1/NLM4 (NOD26-LIKE INTRINSIC PROTEIN 2;1); lactate transmembrane transporter/ water channel	1.32867	1.28698	1.85796	1.79775	0.0164529	0.661505	0.485767	0.259206	AT1G62380	ACO2 (ACC OXIDASE 2)	-0.434371	-0.503322	-0.575941	-0.736785	-0.750189	-0.740673	-0.843737	-0.644641
AT2G34500	CYP710A1 (cytochrome P450, family 710, subfamily A, polypeptide 1); C-22 sterol desaturase/ oxygen binding	-0.244475	-0.555265	-0.453534	-1.41737	-0.256312	0.817499	0.071327	0.0418692	AT1G62480	vacuolar calcium-binding protein-related	-0.583453	-0.759039	-0.918675	-1.35143	-0.132885	-0.165288	-0.334666	-0.687666
AT2G34610	hypothetical protein	-1.11578	-1.14156	-1.3484	-0.941029	0.0509426	0.383253	0.286412	0.593915	AT1G62500	protease inhibitor/seed storage/lipid transfer protein (LTP) family protein	-0.151521	-0.121967	-0.153188	-0.242346	-0.256122	0.0347434	-0.274614	-0.478025
AT2G34700	pollen Ole e 1 allergen and extensin family protein	2.92358	2.84579	3.18001	3.06889	-0.667639	2.54365	2.93579	2.64583	AT1G62540	flavin-containing monooxygenase family protein / FMO family protein	0.620396	1.12796	1.87068	2.34184	2.10848	1.984	2.0845	2.78364
AT2G35075	hypothetical protein	-0.462832	-0.670452	-0.976569	-1.25114	-0.269802	0.136916	0.157088	0.241186	AT1G62560	flavin-containing monooxygenase family protein / FMO family protein	0.442131	0.599755	0.776431	1.15894	1.02924	0.846783	1.03257	1.58975
AT2G35340	MEE29 (maternal effect embryo arrest 29); ATP-dependent RNA helicase	-0.12559	-0.442781	-0.945682	-1.42579	-0.0235793	-0.142316	-0.217147	-0.265412	AT1G62570	flavin-containing monooxygenase family protein / FMO family protein	0.493151	0.160214	0.501272	1.11861	0.470034	1.12793	0.71262	0.987197
AT2G35350	PLL1 (POLTERGEIST LIKE 1); protein serine/threonine phosphatase	0.267889	0.784004	0.661992	1.04731	0.14319	0.540552	1.1839	0.762411	AT1G62620	flavin-containing monooxygenase family protein / FMO family protein	0.326217	0.385505	0.496745	0.830882	1.30179	0.889206	0.702703	1.1807
AT2G35658	hypothetical protein	0.0778005	0.746357	1.07661	0.905365	-0.125695	-0.0764847	0.00293093	-0.19005	AT1G62710	BETA-VPE (vacuolar processing enzyme beta); cysteine-type endopeptidase	0.559192	0.753577	1.30051	1.84807	0.802935	0.820343	0.942973	1.0555
AT2G35980	YLS9 (YELLOW-LEAF-SPECIFIC GENE 9)	-1.16043	-0.871963	-0.47555	-0.285092	-1.10839	0.473925	-0.0365381	0.0797157	AT1G63550	hypothetical protein	-1.3412	-1.26028	-2.37548	-2.04174	-1.91294	-2.99338	-3.41242	-2.7905
AT2G36100	integral membrane family protein	-0.271901	-0.657853	-0.699227	-1.11679	-0.460101	-0.0104383	-0.659125	-0.470028	AT1G63560	hypothetical protein	-2.59326	-2.38632	-2.91737	-3.52428	-2.13117	-1.85471	-2.59479	-2.27152
AT2G36255	hypothetical protein	-0.533025	-2.78962	-5.47546	-6.18691	0.593869	-5.74737	-5.97019	-6.94285	AT1G63750	ATP binding / nucleoside-triphosphatase/ nucleotide binding / protein binding	0.569625	1.03204	1.70407	1.65871	0.6541	0.485316	0.25791	0.392581
AT2G36780	UDP-glucoronosyl/UDP-glucosyl transferase family protein	0.267075	0.0742698	0.717427	1.26017	0.236878	0.0848974	0.106641	0.575089	AT1G63840	zinc finger (C3HC4-type RING finger) family protein	-0.518624	-0.501128	-0.518329	-0.902844	-0.631624	-0.713394	-0.745917	-1.42375
AT2G36854	hypothetical protein	1.50577	1.24114	1.58214	1.76941	1.17758	1.11121	0.864203	1.3403	AT1G63860	pseudo	-0.30323	1.14102	1.34524	0.9675	-0.474554	-0.717888	-0.497127	-1.2569
AT2G37210	hypothetical protein	0.874013	1.34621	1.56178	0.801567	-0.609967	0.532058	0.82432	0.487513	AT1G63960	hypothetical protein	1.27973	1.46754	1.32598	0.459688	0.682782	1.12539	0.810109	0.805609
AT2G37440	endonuclease/exonuclease/phosphatase family protein	-0.587429	-0.702677	-1.21733	-1.38185	-0.21673	-0.156597	-0.477271	-1.16712	AT1G64110	AAA-type ATPase family protein	0.441916	0.776748	1.37602	2.2245	2.53541	2.71296	3.11006	3.54791
AT2G37640	ATEXPA3 (ARABIDOPSIS THALIANA EXPANSIN A3)	1.22864	0.902923	1.112	1.03454	-0.0206064	0.592733	0.24598	0.819716	AT1G64405	hypothetical protein	0.504564	0.717024	1.05857	1.30676	0.485719	0.407569	0.655231	1.043
AT2G37670	WD-40 repeat family protein	-0.093826	-0.421758	-0.703005	-1.03498	-0.308897	0.101165	-0.343832	-0.135514	AT1G64590	short-chain dehydrogenase/reductase (SDR) family protein	-1.14961	-1.28151	-1.21036	-1.92325	-0.757482	-0.67384	-1.26259	-1.43866
AT2G37980	hypothetical protein	-0.442869	-0.408446	-0.983091	-1.47833	-0.247834	0.0837348	-0.0342061	0.146318	AT1G64660	ATMGL; catalytic/ methionine gamma-lyase	0.240708	0.143671	0.484906	1.07808	0.766592	0.780132	1.00566	1.45008
AT2G38080	IRX12/LAC4 (laccase 4); copper ion binding / oxidoreductase	0.0437734	0.00910561	-0.414956	-0.995775	0.306738	0.235296	0.268743	-0.186904	AT1G64820	MATE efflux family protein	-1.69622	-1.74523	-2.13294	-2.19445	-1.9381	-1.73812	-1.80154	-2.18616
AT2G38940	ATPT2 (PHOSPHATE TRANSPORTER 2); carbohydrate transmembrane transporter/ phosphate transmembrane transporter/ sugar:hydrogen ion symporter	0.491946	0.421495	0.679669	1.47745	0.682045	0.70885	0.814803	1.01353	AT1G64910	glycosyltransferase family protein	-1.03644	-1.04254	-1.78769	-1.23219	-0.821001	-1.1055	-1.13182	-1.07983
AT2G39040	peroxidase, putative	-0.266705	-0.9162	-1.30762	-1.77786	0.126668	0.146415	0.238121	-0.389908	AT1G64970	G-TMT (GAMMA-TOCOPHEROL METHYLTRANSFERASE)	0.475841	0.548948	1.05243	1.5536	1.21132	1.00311	0.976283	1.47398
AT2G39180	protein kinase family protein	-0.483053	-0.51758	-1.04812	-1.31342	0.0324194	0.0716764	0.0551951	0.0327013	AT1G65480	FT (FLOWERING LOCUS T)	-2.26228	-2.81657	-3.51236	-4.11397	-1.78677	-3.05878	-4.01346	-4.20138
AT2G39330	jacalin lectin family protein	-0.0643907	0.40454	2.01364	1.58279	-0.119258	0.181287	-0.161763	0.0633532	AT1G65486	hypothetical protein	0.326696	1.38247	1.95658	1.62996	0.184195	0.765332	0.90902	0.854051
AT2G39490	F-box family protein	1.01672	0.629788	0.645533	0.16997	0.795382	0.323921	0.0487741	0.171593	AT1G65490	hypothetical protein	1.46255	2.77195	3.51116	3.56503	1.23443	1.4642	1.38372	1.2947
AT2G39510	nodulin MtN21 family protein	1.58133	0.135222	1.04316	1.5104	0.33444	2.26494	2.15784	2.08283	AT1G65500	hypothetical protein	0.813867	1.41043	2.74497	3.09914	1.06988	2.92435	3.56634	3.72001
AT2G39570	ACT domain-containing protein	-0.755685	-1.00207	-1.24436	-1.40599	0.0193252	0.0323931	-0.0872796	-0.0995218	AT1G65670	CYP702A1 (CYTOCHROME P450, FAMILY 702, SUBFAMILY A, POLYPEPTIDE 1); oxygen binding	1.17555	0.905024	1.05833	0.789339	0.970383	0.496724	0.336732	1.18629
AT2G39700	ATEXPA4 (ARABIDOPSIS THALIANA EXPANSIN A4)	0.479537	1.00493	1.31329	1.39179	0.581323	0.0582083	1.42517	-0.0185724	AT1G65680	ATEXPB2 (ARABIDOPSIS THALIANA EXPANSIN B2)	1.5405	1.36066	1.75573	1.49484	1.48671	1.27503	1.73751	2.67835
AT2G40130	heat shock protein-related	-0.228283	-0.201304	-0.650883	-1.16587	-0.0107797	-0.678835	-0.603839	-0.693352	AT1G65860	flavin-containing monooxygenase family protein / FMO family protein	0.603418	0.686337	0.984674	1.19535	1.06716	0.952432	0.790285	1.35231
AT2G40450	speckle-type POZ protein-related	-0.757695	-0.736108	-0.986082	-1.21524	-0.771793	-0.267263	0.524704	-0.412359	AT1G65880	BZO1; benzoate-CoA ligase	0.236807	0.413983	1.8893	1.7208	-0.487724	0.112974	0.301609	0.353964
AT2G40520	nucleotidyltransferase family protein	0.766681	0.855744	1.18837	1.24797	0.265228	0.654702	0.619431	0.830397	AT1G65890	acyl-activating enzyme 12 (AAE12)	2.11077	2.03906	3.57222	3.11262	1.34461	2.07503	1.9352	2.77354
AT2G40880	FL3-27; cysteine protease inhibitor	0.445121	0.199717	0.315071	1.7365	0.513912	0.306997	0.0211709	0.212932	AT1G65970	TPX2 (THIOREDOXIN-DEPENDENT PEROXIDASE 2); antioxidant	-1.38638	-1.19075	-1.37478	-0.996964	-0.227997	-0.958237	-0.969575	-0.853036
AT2G40955	hypothetical protein	1.36629	0.750666	0.998233	1.14703	0.0157514	0.621236	0.878763	0.891879	AT1G66200	ATGSR2 (Arabidopsis thaliana glutamine synthase clone R2); glutamate-ammonia ligase	0.137818	0.221877	0.631423	1.16672	0.164027	0.0076249	-0.141144	0.0738685
AT2G41420	proline-rich family protein	0.0602209	0.450135	0.742167	1.129	0.305663	-0.306956	-0.0457284	-0.151082	AT1G66400	calmodulin-related protein, putative	0.167361	0.256608	0.708728	1.80191	0.947495	0.698573	0.467073	0.622014
AT2G42560	late embryogenesis abundant domain-containing protein / LEA domain-containing protein	2.24519	3.02551	2.20631	4.40372	1.55134	0.687018	3.15684	2.95809	AT1G66540	cytochrome P450, putative	-1.06541	-1.06864	-1.02663	-1.12918	-0.749139	-1.68191	-1.64695	-1.81718
AT2G42720	F-box family protein	-0.83766	-1.01774	-1.41688	-1.60608	-0.34545	-0.369826	-0.0783588	0.0895463	AT1G66725	misc_RNA	-1.25385	-1.17549	-1.00896	-0.976884	-1.06768	-0.967273	-1.2054	-1.36961
AT2G42830	SHP2 (SHATTERPROOF 2); transcription factor	1.35025	1.05918	1.9856	1.9813	1.71268	1.5131	1.03813	0.983481	AT1G66780	MATE efflux family protein	0.896447	0.978049	1.45949	1.5317	1.15966	1.47817	1.34803	1.41539
AT2G43000	ANAC042 (Arabidopsis NAC domain containing protein 42); transcription factor	-1.9039	-1.86255	-1.4948	-1.30388	-1.08529	-0.309341	0.0651493	-0.0231618	AT1G66830	leucine-rich repeat transmembrane protein kinase, putative	0.883394	1.23026	1.49325	1.57051	0.863855	1.31642	1.7394	1.95888
AT2G43150	proline-rich extensin-like family protein	-0.236503	-0.319525	-0.625156	-1.23886	-0.393284	-0.119205	-0.652086	-1.02505	AT1G66870	glycosyl hydrolase family protein 17	1.16741	1.28735	2.07396	2.04846	1.14183	1.90682	0.913604	1.18463
AT2G43480	peroxidase, putative	-0.803506	-0.857046	-1.42519	-1.76518	-0.050927	-0.246569	0.220607	-0.290574	AT1G66920	serine/threonine protein kinase, putative	0.288752	0.802491	1.67904	1.753	0.210178	0.908861	0.779715	1.05377
AT2G43590	chitinase, putative	1.29272	0.664388	0.632405	0.354838	-0.494897	0.878877	0.88716	1.60392	AT1G66930	serine/threonine protein kinase family protein	-0.614854	-0.758965	-1.45679	-1.76449	-1.15966	-1.98264	-2.65595	-3.0014
AT2G43660	glycosyl hydrolase family protein 17	0.316025	0.612634	0.787962	1.04899	0.451018	-0.415844	-0.518418	-0.569103	AT1G66940	protein kinase-related	-0.312161	-0.318628	-0.409267	-0.341998	-0.745111	-1.15905	-0.894273	-1.00865
AT2G44080	ARL (ARGOS-LIKE)	-0.30913	-0.370928	-0.974244	-1.07365	0.00100166	-0.286193	-0.363351	-0.470065	AT1G67100	LBD40 (LOB DOMAIN-CONTAINING PROTEIN 40)	3.26016	3.61777	4.88353	5.14331	2.71689	3.37184	4.17674	3.79103
AT2G44110	MLO15 (MILDEW RESISTANCE LOCUS O 15); calmodulin binding	-0.226322	-0.902725	-1.55386	-2.38764	-0.665297	0.0557278	-0.670304	-0.684886	AT1G67105	misc_RNA	1.95381	2.106	2.61417	2.03224	0.775228	0.936116	1.41995	1.81236
AT2G44370	DC1 domain-containing protein	0.173472	0.537006	0.960938	1.1543	-0.0982935	-0.0371562	-0.0274552	0.377559	AT1G67150	hypothetical protein	-1.20896	-1.19092	-1.8473	-1.82811	-1.51248	-1.65583	-2.02377	-1.74606
AT2G44990	CCD7 (more axillary growth 3)	-0.305996	-0.643269	-1.56282	-2.93231	0.270224	-1.01579	-2.36039	-2.90761	AT1G67300	hexose transporter, putative	0.606954	0.810598	1.2978	1.35404	0.609661	0.760126	0.872569	1.06936
AT2G45070	SEC61 BETA (suppressors of secretion-defective 61 Beta); protein transporter	0.246957	0.184131	0.220467	0.059336	-0.09354	0.306278	0.20856	0.289239	AT1G67365	misc_RNA	0.493517	0.397334	0.692306	0.580404	0.397375	0.712646	0.571647	0.690415
AT2G45135	protein binding / zinc ion binding	0.542202	0.651102	1.30845	1.42585	0.674831	0.201402	0.387489	0.283462	AT1G67600	hypothetical protein	0.462186	0.458613	1.14137	1.02809	0.606735	0.417291	0.250451	0.35002
AT2G45660	AGL20 (AGAMOUS-LIKE 20); transcription factor	-0.223229	-0.606307	-0.775141	-1.23218	0.154637	-0.28268	-0.578592	-0.78934	AT1G67710	ARR11 (RESPONSE REGULATOR 11); transcription factor/ two-component response regulator	-0.36201	-0.372071	-0.917574	-1.50373	-0.159635	-0.361011	-0.618607	-0.956845
AT2G45780	misc_RNA	1.15515	1.54859	0.924511	1.0027	1.21365	0.5259	1.1634	1.00285	AT1G67810	Fe-S metabolism associated domain-containing protein	-1.73327	-2.11201	-2.10976	-1.67918	-0.81046	-0.910047	-0.924072	-0.587032
AT2G46400	WRKY46 (WRKY DNA-binding protein 46); transcription factor	0.999467	1.83639	2.44719	2.12884	0.230952	1.59536	0.931688	1.12222	AT1G67860	hypothetical protein	-0.614378	-0.31441	-0.848149	-1.51837	-0.220316	-1.04145	-1.23639	-1.61737
AT2G46490	hypothetical protein	0.152581	0.106786	0.172713	1.64351	1.56151	0.859993	0.572547	1.37858	AT1G67865	hypothetical protein	-0.768426	-0.932094	-1.80472	-3.37357	-0.0517273	-1.21112	-1.73507	-2.01323
AT2G46850	ATP binding / protein kinase/ protein-tyrosine kinase	-0.486797	-0.534094	-1.52744	-2.01167	-0.407088	-0.475028	-0.0471441	-0.778057	AT1G67980	CCoAMT (caffeoyl-CoA 3-O-methyltransferase); caffeoyl-CoA O-methyltransferase	-1.75024	-1.5606	-1.64257	-1.58278	-2.08627	-1.73183	-2.03571	-2.31372
AT2G47060	serine/threonine protein kinase, putative	0.390838	0.899927	1.19759	1.03695	0.149795	0.0194446	-0.163481	-0.111211	AT1G68450	VQ motif-containing protein	-0.611947	-0.437583	-0.333023	-0.402696	-0.667439	-0.671981	-0.971394	-0.411575
AT2G47190	MYB2 (myb domain protein 2); DNA binding / transcription factor	0.687778	0.714208	1.09623	1.64322	0.447472	1.1943	0.726111	1.22636	AT1G68500	hypothetical protein	0.372524	0.42564	0.673706	1.11093	0.685557	0.616146	0.662835	0.690516
AT2G47670	invertase/pectin methylesterase inhibitor family protein	-0.17348	-0.385863	-0.683987	-1.24116	0.043732	0.20241	-0.0197355	0.250416	AT1G68570	proton-dependent oligopeptide transport (POT) family protein	0.684479	0.8936	1.43822	1.91841	1.08069	1.12455	1.32986	1.70501
AT2G47870	glutaredoxin family protein	1.29966	1.53329	1.13957	0.947847	0.503544	0.102529	0.241818	0.102317	AT1G68600	hypothetical protein	0.694944	0.489069	1.04047	1.09817	0.334256	0.478493	0.245833	0.444238
AT3G01080	WRKY58 (WRKY DNA-binding protein 58); transcription factor	-0.270267	-0.504282	-0.823782	-1.54211	-1.13139	0.0173273	-0.700045	-0.079089	AT1G68795	CLE12 (CLAVATA3/ESR-RELATED 12); receptor binding	0.263484	0.335109	0.732193	1.07138	0.643847	0.339688	0.566418	0.645973
AT3G01170	structural constituent of ribosome	0.410204	0.357101	0.669176	1.23686	0.7317	0.497288	0.314136	0.784226	AT1G68825	DVL5/RTFL15 (ROTUNDIFOLIA LIKE 15)	-0.334098	-0.451986	-1.16909	-1.54527	-0.36886	-0.285241	-0.20603	-1.00477
AT3G01220	ATHB20 (ARABIDOPSIS THALIANA HOMEOBOX PROTEIN 20); DNA binding / transcription factor	-0.393336	-0.59546	-0.821095	-1.10261	-0.431385	-0.112648	-0.423806	-0.415001	AT1G68862	hypothetical protein	-0.509609	-0.427215	-0.722725	-1.08413	-0.536482	-0.530294	-0.398244	-0.59837
AT3G01390	VMA10 (VACUOLAR MEMBRANE ATPASE 10)	0.137813	0.265423	0.690036	1.06086	0.0762852	-0.11707	0.0805537	-0.609973	AT1G69120	AP1 (APETALA1); DNA binding / transcription factor	-2.47828	-2.45809	-3.15475	-3.75112	-1.49094	-2.97035	-3.17454	-3.63251
AT3G01516	hypothetical protein	-0.348048	-0.30402	-1.11564	-1.32488	-0.416521	-0.132896	0.179587	-0.327193	AT1G69140	pseudo	1.75677	1.64174	1.46356	1.14163	1.68889	1.80805	1.25988	1.609
AT3G02240	hypothetical protein	0.510579	0.571898	0.937133	1.40497	0.226861	0.148176	-0.10895	0.25024	AT1G69240	hydrolase, alpha/beta fold family protein	-0.179499	-0.478415	-0.96295	-1.47466	-0.542064	-0.24701	-0.742208	-1.17008
AT3G02242	hypothetical protein	1.4872	1.64393	1.69061	2.14287	0.530504	1.34816	0.980688	0.724384	AT1G69260	hypothetical protein	0.984106	0.992238	1.3311	1.21388	1.66157	2.12265	1.90897	2.38464
AT3G03020	hypothetical protein	0.109529	0.573831	0.889356	0.782565	-0.0558845	-0.175005	-0.191007	-0.299981	AT1G69480	EXS family protein / ERD1/XPR1/SYG1 family protein	1.19909	1.69436	2.29375	2.76838	1.55541	1.73749	1.82021	2.23095
AT3G03280	hypothetical protein	0.774279	0.648821	1.04229	0.894125	0.318748	0.516656	0.385551	0.154577	AT1G69530	ATEXPA1 (ARABIDOPSIS THALIANA EXPANSIN A1)	1.61159	1.19898	1.62437	1.94948	0.401103	1.02605	1.35675	1.75058
AT3G03430	polcalcin, putative / calcium-binding pollen allergen, putative	1.34948	1.37946	1.61803	1.13036	1.31985	1.28034	1.10954	0.210316	AT1G69570	Dof-type zinc finger domain-containing protein	-0.106308	-0.332621	-0.4624	-0.768911	-1.02549	-0.97774	-1.38718	-1.37059
AT3G03470	CYP89A9 (cytochrome P450, family 87, subfamily A, polypeptide 9); oxygen binding	-1.044	-1.49001	-1.33002	-1.03351	0.0641188	-1.2152	-1.47976	-1.29905	AT1G69610	structural constituent of ribosome	0.508593	0.651832	1.01522	1.15904	0.123353	0.224967	0.160298	0.470291
AT3G03830	auxin-responsive protein, putative	1.74103	1.65126	2.3277	2.15931	-0.317184	0.970727	0.584709	-0.313485	AT1G69790	protein kinase, putative	0.368324	0.682022	1.22652	1.32048	0.495344	0.562942	0.288986	0.880307
AT3G03840	auxin-responsive protein, putative	1.92845	2.16892	2.86283	3.05561	1.33896	1.59338	1.46033	-0.0826126	AT1G69880	ATH8 (thioredoxin H-type 8); thiol-disulfide exchange intermediate	0.719454	1.09144	1.05419	1.30908	0.971214	0.257111	0.585346	0.420566
AT3G03910	glutamate dehydrogenase, putative	-1.06268	-1.63322	-0.618332	-0.654064	-0.710294	0.684874	0.331399	0.520069	AT1G70170	MMP (MATRIX METALLOPROTEINASE); metalloendopeptidase	-0.764456	-0.646459	-0.457788	-0.486588	-0.590371	-0.791224	-0.790275	-1.67872
AT3G04120	GAPC (GLYCERALDEHYDE-3-PHOSPHATE DEHYDROGENASE C SUBUNIT); glyceraldehyde-3-phosphate dehydrogenase	0.328802	0.374773	0.54431	1.04828	0.311113	0.357876	0.0891962	0.541755	AT1G70260	nodulin MtN21 family protein	1.7629	1.93253	2.79362	3.00632	0.559202	1.26019	1.07866	1.99031
AT3G05400	sugar transporter, putative	0.552219	0.755232	1.0778	1.44158	0.70714	0.297238	0.113362	0.899148	AT1G70270	hypothetical protein	-1.09806	-1.33182	-1.47738	-1.23254	-0.343633	-1.43823	-0.611126	-0.467032
AT3G05720	importin alpha-1 subunit, putative	1.09272	1.04159	0.860971	0.642502	0.260232	0.826595	0.94881	0.737383	AT1G70280	NHL repeat-containing protein	0.285488	0.398555	0.652381	1.14888	0.443207	0.17469	0.180067	0.37836
AT3G05790	Lon protease, putative	0.427824	0.543649	0.306716	1.15217	0.796937	0.471199	0.562618	1.28395	AT1G70440	SRO3 (SIMILAR TO RCD ONE 3); NAD+ ADP-ribosyltransferase	0.423799	0.766269	1.40867	1.85012	1.12311	0.932021	1.49121	1.10464
AT3G06145	hypothetical protein	-0.169156	-0.522808	-0.818908	-1.16288	0.0714074	-0.175708	-0.137875	-0.27125	AT1G70640	octicosapeptide/Phox/Bem1p (PB1) domain-containing protein	2.15226	1.66267	2.48294	3.25502	3.11181	2.4269	2.43099	1.98476
AT3G06433	pseudo	-0.386176	-0.354393	-0.113053	0.078312	-0.294217	0.447824	0.251617	0.0577322	AT1G70720	invertase/pectin methylesterase inhibitor family protein	2.39453	2.6176	3.10979	3.12644	3.28997	2.91387	2.59462	2.52022
AT3G06437	pseudo	0.612553	1.33445	1.91013	2.33549	0.538618	0.895573	0.648274	0.796265	AT1G70800	C2 domain-containing protein	0.364005	0.715757	1.0606	1.2316	0.653992	0.892578	1.03974	1.08048
AT3G06460	GNS1/SUR4 membrane family protein	-0.38885	-0.705942	-1.49514	-1.48721	-0.259427	0.121261	0.0192895	-0.0319638	AT1G70830	MLP28 (MLP-LIKE PROTEIN 28)	0.444097	0.396433	0.604589	0.532606	0.665471	0.753491	0.577399	1.1218
AT3G07350	hypothetical protein	1.02353	0.824829	0.884873	0.32413	0.771776	0.633894	0.0289712	0.0175535	AT1G70985	hydroxyproline-rich glycoprotein family protein	-1.51429	-1.30064	-1.83716	-2.1713	-0.356992	-0.989601	-0.740239	-1.02441
AT3G08980	signal peptidase I family protein	0.132347	0.200452	0.510901	1.13253	-0.134774	-0.119266	0.330657	-0.155796	AT1G71000	DNAJ heat shock N-terminal domain-containing protein	1.49901	0.228657	0.431438	0.503838	1.06588	1.76493	1.90262	2.38314
AT3G09162	hypothetical protein	0.471747	0.316266	0.919775	1.23857	0.103131	0.136397	0.256916	0.147787	AT1G71030	ATMYBL2 (Arabidopsis myb-like 2); DNA binding / transcription factor	-0.577032	-1.33251	-1.0443	-0.880965	-1.74497	-2.08915	-2.39538	-2.70147
AT3G09940	ATMDAR3/MDHAR (MONODEHYDROASCORBATE REDUCTASE); monodehydroascorbate reductase (NADH)	-1.15295	-1.33887	-1.76786	-1.81054	-0.246137	-0.0375694	-0.093957	0.214124	AT1G71691	GDSL-motif lipase/hydrolase family protein	1.53056	1.88906	2.25122	2.20154	1.00725	1.79969	2.04209	2.11734
AT3G11180	oxidoreductase, 2OG-Fe(II) oxygenase family protein	3.12104	3.13202	3.91969	3.91929	1.79181	3.56612	3.4358	4.29161	AT1G71770	PAB5 (POLY(A)-BINDING PROTEIN); RNA binding	1.55292	2.17188	3.58296	3.61846	0.97602	1.1957	1.21778	1.63886
AT3G12145	FLR1 (FLOR1); enzyme inhibitor	0.447992	0.562902	1.78035	1.44175	0.127246	0.157484	0.0675106	0.0139793	AT1G71865	hypothetical protein	0.51116	0.47408	0.535756	0.77214	0.648082	0.587111	0.664352	1.05278
AT3G12910	transcription factor	-3.25323	-4.1219	-4.04973	-3.93111	-1.091	0.733429	2.01291	2.65897	AT1G72060	serine-type endopeptidase inhibitor	0.219594	0.704886	1.5789	1.50218	0.504712	1.07141	0.930816	0.479562
AT3G12955	auxin-responsive protein-related	-1.0418	-0.582112	-0.379734	-0.39719	-0.0111017	-0.853055	-0.269666	-1.5774	AT1G72100	late embryogenesis abundant domain-containing protein / LEA domain-containing protein	1.61359	1.47439	1.77931	4.20741	1.2156	1.6748	3.6357	3.8602
AT3G13061	misc_RNA	-0.854849	-0.797132	-1.13815	-1.25727	0.260792	-0.424117	-0.443065	-0.958972	AT1G72360	ethylene-responsive element-binding protein, putative	-0.861496	-0.903253	-0.990508	-1.06805	-0.891828	-1.23958	-1.28468	-1.07953
AT3G13403	hypothetical protein	0.325322	1.16669	0.853639	1.2657	1.05833	0.379208	1.6273	-0.157114	AT1G72520	lipoxygenase, putative	0.0454082	0.89206	1.77283	1.79491	0.112317	0.746558	0.347357	1.13237
AT3G13450	DIN4 (DARK INDUCIBLE 4); 3-methyl-2-oxobutanoate dehydrogenase (2-methylpropanoyl-transferring)	-0.119081	-0.42151	-0.526688	-1.01971	-0.34504	-0.0213578	-0.322049	-0.384297	AT1G72720	hypothetical protein	0.817937	0.948332	1.48542	1.53902	1.13851	0.800678	0.977941	1.22399
AT3G13900	haloacid dehalogenase-like hydrolase family protein	-0.436742	-0.823856	-1.64449	-2.10045	-0.698295	-0.31519	-0.978858	-1.47748	AT1G73040	jacalin lectin family protein	0.80343	1.43583	1.9644	2.03073	1.62839	1.22103	1.41638	1.32425
AT3G14260	hypothetical protein	-0.118312	-0.648432	-0.870652	-1.05332	-0.640608	0.00723802	-0.600327	-0.568237	AT1G73160	glycosyl transferase family 1 protein	-0.235396	-0.200083	-1.18628	-1.07534	-0.0960602	-0.144503	-0.0140769	-0.361628
AT3G14395	hypothetical protein	0.645924	0.716242	1.2415	0.94482	0.44575	0.422471	0.55531	0.0706349	AT1G73260	trypsin and protease inhibitor family protein / Kunitz family protein	-1.0732	-1.24894	-1.7305	-1.24828	-0.30038	-1.21616	-1.74969	-1.68327
AT3G14530	geranylgeranyl pyrophosphate synthase, putative / GGPP synthetase, putative / farnesyltranstransferase, putative	-0.207364	-0.397034	-1.44961	-1.36602	-0.509869	-0.0458013	-0.0686117	-0.161472	AT1G73270	SCPL6 (serine carboxypeptidase-like 6); serine carboxypeptidase	-0.169203	-0.332396	-0.205532	-0.246179	-0.33245	-0.745135	-1.04563	-0.918774
AT3G15240	hypothetical protein	-0.972259	-0.86967	-1.96637	-2.54146	-0.836225	-0.495483	-0.236078	-0.774734	AT1G73280	SCPL3 (serine carboxypeptidase-like 3); serine carboxypeptidase	-0.745025	-1.1422	-1.16441	-0.976202	-0.320237	-0.225096	-0.979228	-0.374526
AT3G15350	glycosyltransferase family 14 protein / core-2/I-branching enzyme family protein	0.14249	0.746277	0.875547	1.17965	-0.105078	0.0948275	0.460798	0.246633	AT1G73325	trypsin and protease inhibitor family protein / Kunitz family protein	2.78786	2.9916	5.64549	5.27302	3.88501	4.10676	4.44762	4.69092
AT3G15450	hypothetical protein	-0.955635	-1.09339	-1.35019	-2.28863	-0.755583	-0.903511	-1.16605	-2.20367	AT1G73550	lipid binding	0.307114	1.73064	2.38052	2.58282	1.15905	0.305252	1.3869	0.845976
AT3G16175	thioesterase family protein	0.700203	0.477195	1.08378	1.30657	0.369583	0.128318	-0.179807	-0.0817857	AT1G73600	phosphoethanolamine N-methyltransferase	-0.37237	-0.236693	-0.364905	-0.408901	-0.716423	-1.29335	-1.4671	-1.19744
AT3G16410	jacalin lectin family protein	-0.575521	-0.746592	-1.17517	-1.23667	-0.485075	-0.172292	-0.105022	-0.534671	AT1G73680	pathogen-responsive alpha-dioxygenase, putative	0.233351	0.299336	0.672957	0.730202	0.917826	1.28243	1.29151	1.61492
AT3G16920	chitinase	-0.196757	-0.302957	-0.688016	-1.19841	0.388756	0.124551	0.0798396	0.0445858	AT1G74080	MYB122 (myb domain protein 122); DNA binding / transcription factor	-1.17085	-1.1967	-1.10106	-1.24559	-1.11868	-0.834605	-0.915678	-0.486486
AT3G17010	transcriptional factor B3 family protein	0.750761	0.854288	1.01166	1.33598	0.168283	1.23305	0.839486	1.49907	AT1G74130	rhomboid family protein	1.38127	0.972134	0.227315	1.21932	1.12314	0.852223	1.16994	1.15517
AT3G17200	pseudo	0.315305	0.166708	0.344252	0.227774	0.0354247	0.415284	0.101085	0.00796797	AT1G74150	hypothetical protein	-0.201229	-0.156511	-0.605619	-1.09115	-0.525243	-0.578209	-0.305554	-0.586664
AT3G18360	VQ motif-containing protein	0.971791	1.11804	1.61974	1.28912	0.0566127	0.336305	0.595677	0.356388	AT1G74430	MYB95 (myb domain protein 95); DNA binding / transcription factor	0.430219	0.670575	1.41175	1.18199	0.295147	0.478688	0.31556	0.509911
AT3G18550	BRC1/TCP18 (BRANCHED1)	-0.498815	-0.71861	-0.50273	-0.657711	-0.530925	-0.812438	-0.604905	-0.455966	AT1G74500	bHLH family protein	-0.965143	-0.569013	-1.01588	-1.01143	-0.334612	-1.04866	-0.0910418	-1.99769
AT3G18590	plastocyanin-like domain-containing protein	-0.620665	-1.52992	-1.31097	-1.7382	-0.429518	-0.605818	-0.199223	-0.510051	AT1G74670	gibberellin-responsive protein, putative	1.48632	1.3651	1.26929	1.33602	0.678555	0.832101	0.913312	0.7796
AT3G19850	phototropic-responsive NPH3 family protein	-0.578217	-0.451482	-0.564447	-1.21044	0.0598076	-0.318068	0.0139535	-0.979412	AT1G75160	hypothetical protein	-0.883358	-0.888034	-0.745603	-0.99564	-0.613178	-0.823641	-0.93195	-2.12747
AT3G20110	CYP705A20 (cytochrome P450, family 705, subfamily A, polypeptide 20); oxygen binding	-0.94722	-0.88591	-1.15517	-1.39268	-0.63751	-0.411831	-0.320957	-0.0326651	AT1G75250	myb family transcription factor	-0.537601	-1.2689	-2.22043	-2.77366	-0.955602	-1.2053	-1.76214	-2.11603
AT3G20160	geranylgeranyl pyrophosphate synthase, putative / GGPP synthetase, putative / farnesyltranstransferase, putative	-0.120426	-0.335584	-1.03449	-1.14528	-0.27172	0.65036	0.361635	0.756896	AT1G75550	glycine-rich protein	-0.405794	-0.446682	-0.864136	-0.641224	-0.480397	-0.825801	-0.699109	-1.45302
AT3G20180	metal ion binding	0.348665	0.494696	1.01286	0.976299	0.304321	0.39971	0.479143	0.234878	AT1G75750	GASA1 (GAST1 PROTEIN HOMOLOG 1)	-0.635667	-1.04883	-1.16893	-1.02962	-0.752156	-0.969075	-1.21792	-1.53768
AT3G20200	protein kinase family protein	-0.0602436	-0.304463	-0.791622	-1.2329	-0.0304467	0.27709	0.199719	0.278661	AT1G75900	family II extracellular lipase 3 (EXL3)	0.969703	0.540324	1.24145	1.84115	1.22569	1.39031	1.14508	1.67489
AT3G20460	sugar transporter, putative	-0.103897	-0.939312	-1.52615	-2.00483	-0.703542	0.0570554	-1.1033	-0.735601	AT1G75960	AMP-binding protein, putative	-0.461572	-0.505493	-0.468203	-0.326649	-0.261351	-1.03089	-0.9236	-0.623814
AT3G21215	RNA-binding protein, putative	-0.0193456	-0.0296029	0.017894	-0.0412259	-0.316483	-0.135549	-0.243782	-0.0291276	AT1G76040	CPK29 (calcium-dependent protein kinase 29); calmodulin-dependent protein kinase/ kinase	0.216515	0.799654	1.09351	0.940272	0.331396	0.681933	0.593563	0.59642
AT3G22060	receptor protein kinase-related	-1.10275	-1.4271	-1.117	-1.06152	-0.689693	0.00156938	0.0809782	0.388908	AT1G76250	hypothetical protein	-0.382659	-0.528384	-0.844956	-1.15398	-0.218559	-0.162564	-0.513664	-0.260845
AT3G22270	hypothetical protein	-0.286642	-0.24847	-0.349274	-0.798404	-0.447497	-0.20001	-0.43062	-0.440109	AT1G76520	auxin efflux carrier family protein	-0.929754	-1.36028	-1.28403	-0.556113	-0.394711	-0.94583	-0.89244	-0.526003
AT3G22970	hypothetical protein	0.116677	0.509681	1.02374	1.52938	-0.262336	-0.686748	-0.17311	-1.3953	AT1G76680	OPR1 (12-oxophytodienoate reductase 1); 12-oxophytodienoate reductase	-1.33244	-1.33221	-0.880838	-0.628876	-1.17488	-1.24905	-1.22518	-0.847695
AT3G23060	zinc finger (C3HC4-type RING finger) family protein	-0.366573	-0.617372	-0.486357	-1.68136	-0.649635	0.206963	0.0669812	0.155786	AT1G76790	O-methyltransferase family 2 protein	0.381538	0.277287	1.19904	1.28656	0.531031	0.930335	0.731617	1.16575
AT3G23230	ethylene-responsive factor, putative	-0.660639	-2.1739	-3.20928	-2.92371	-0.491179	0.58324	0.232628	1.00881	AT1G76960	hypothetical protein	0.940684	1.39666	1.36107	1.16087	1.57251	1.20919	1.59999	1.37742
AT3G23560	ALF5 (ABERRANT LATERAL ROOT FORMATION 5); antiporter/ transporter	0.112396	0.156413	0.604549	1.18764	-0.0608265	-0.0571313	0.00330953	0.253331	AT1G76990	ACR3 (ACT Domain Repeat 3)	-0.582771	-0.682983	-0.839855	-0.811043	-0.517997	-0.646513	-0.519285	-0.453191
AT3G24300	AMT1;3/ATAMT1;3 (AMMONIUM TRANSPORTER 1;3); ammonium transmembrane transporter	0.241854	0.34322	0.69141	1.15718	-0.0842936	-0.157289	-0.0783231	-0.325466	AT1G77210	sugar transporter, putative	-0.374326	-0.990033	-1.28829	-1.3813	-0.299251	-0.31565	-0.790731	-0.455889
AT3G24715	ATP binding / protein kinase/ protein-tyrosine kinase	-0.14723	-0.166874	-0.579416	-1.1227	-0.463776	-0.207368	-0.355174	-0.667101	AT1G77240	AMP-binding protein, putative	-0.201066	-0.609097	-0.557809	-1.10518	-0.326111	-0.432504	-0.761218	-0.598752
AT3G25830	ATTPS-CIN (TERPENE SYNTHASE-LIKE SEQUENCE-1,8-CINEOLE); myrcene/(E)-beta-ocimene synthase	-1.35229	-2.48971	-1.0105	-0.70118	0.0934806	0.88105	0.20366	-0.201413	AT1G77270	hypothetical protein	-0.298535	-0.236773	-0.761783	-1.32071	-0.0891079	-0.608172	-0.330249	-1.01105
AT3G25950	hypothetical protein	-0.596585	-0.911762	-1.28138	-1.52758	-0.0755716	0.058514	-0.348991	-0.15667	AT1G77450	ANAC032 (Arabidopsis NAC domain containing protein 32); transcription factor	0.700803	0.480954	1.13933	1.69736	0.678277	1.04568	1.05616	1.46536
AT3G26450	major latex protein-related / MLP-related	0.421846	0.400087	0.992655	1.10399	0.229223	0.439882	0.0870177	0.239433	AT1G77660	MORN (Membrane Occupation and Recognition Nexus) repeat-containing protein /phosphatidylinositol-4-phosphate 5-kinase-related	-1.00516	-0.862836	-1.05205	-0.632915	-0.82908	-1.06002	-0.560091	-1.64193
AT3G26820	esterase/lipase/thioesterase family protein	0.606789	1.0198	1.16041	1.41578	0.0238007	0.0621188	0.504042	0.518112	AT1G78000	SULTR1;2 (SULFATE TRANSPORTER 1;2); sulfate transmembrane transporter	0.954805	1.18536	1.50515	1.66589	0.99095	1.19636	1.00437	1.42996
AT3G27710	zinc finger protein-related	-1.07138	-1.05422	-1.19526	-1.25692	-0.0769549	-1.1158	-0.805215	-0.67207	AT1G78070	WD-40 repeat family protein	1.53756	1.36015	2.11667	2.5824	0.812847	1.16791	1.04178	1.55912
AT3G27970	exonuclease	1.7047	1.44774	2.11245	2.04912	-0.298283	0.461357	0.96072	0.668068	AT1G78120	tetratricopeptide repeat (TPR)-containing protein	-0.572054	-0.436693	-0.830281	-1.31791	-0.313542	-0.563248	-0.386112	-0.6527
AT3G28060	nodulin MtN21 family protein	1.27755	0.481337	0.557525	0.706096	-0.0867861	0.686433	0.509701	0.806668	AT1G78260	RNA recognition motif (RRM)-containing protein	-0.199766	-0.157582	-0.546262	-1.09959	-0.508819	-0.286372	-0.472795	-0.662619
AT3G28155	hypothetical protein	-0.712305	-0.527932	-1.97775	-1.56523	-0.630764	-0.522761	-0.249042	-0.688066	AT1G78270	ATUGT85A4 (UDP-GLUCOSYL TRANSFERASE 85A4); UDP-glycosyltransferase/ glucuronosyltransferase/ transferase, transferring hexosyl groups	-0.550263	-0.884064	-1.3358	-1.40002	-0.0565901	-0.700409	-0.545859	-0.582248
AT3G28510	AAA-type ATPase family protein	0.495873	0.773883	1.91452	2.72514	0.0153375	1.7103	1.0733	2.14128	AT1G78360	ATGSTU21 (Arabidopsis thaliana Glutathione S-transferase (class tau) 21); glutathione transferase	1.07578	1.03572	0.993693	0.947311	0.561475	0.724029	0.228709	0.83644
AT3G28540	AAA-type ATPase family protein	0.340306	0.649428	0.889451	1.05811	0.0171399	0.374348	-0.0410085	0.164818	AT1G78370	ATGSTU20 (Arabidopsis thaliana Glutathione S-transferase (class tau) 20); glutathione transferase	0.598266	1.28482	1.83885	2.09754	0.998764	0.812569	1.48055	1.25722
AT3G28740	cytochrome P450 family protein	-2.54348	-3.79337	-2.35297	-1.69193	-0.690142	0.439761	0.140774	1.3968	AT1G78450	SOUL heme-binding family protein	-0.818472	-1.57006	-2.55733	-3.32799	-1.03785	-0.794214	-1.37378	-1.35481
AT3G28857	transcription regulator	0.652137	0.359711	1.24161	1.13564	-0.549309	0.572426	0.218363	0.567998	AT1G78460	SOUL heme-binding family protein	-0.574918	-1.42828	-1.98505	-2.60709	-0.896664	-0.407048	-0.910778	-0.796572
AT3G28910	MYB30 (myb domain protein 30); DNA binding / transcription factor	0.158792	0.514317	0.93804	1.2059	-0.000893204	-0.288715	0.378721	-0.336983	AT1G78520	glycosyl hydrolase family protein 17	-1.17598	-1.23784	-1.67099	-2.06762	-0.394733	-0.699814	-0.31571	-1.28547
AT3G29030	ATEXPA5 (ARABIDOPSIS THALIANA EXPANSIN A5)	-0.246006	0.626921	1.39181	2.00325	-0.618293	-1.26099	-0.408812	-2.06519	AT1G78600	zinc finger (B-box type) family protein	-0.654841	-0.680956	-0.70551	-0.992798	-0.935639	-1.05589	-0.976513	-1.30246
AT3G29250	oxidoreductase	-0.86854	-2.21081	-0.825269	-0.325168	-0.513211	0.294749	-0.204097	0.0847271	AT1G78880	balbiani ring 1-related / BR1-related	-0.679143	-0.164603	-0.237096	-0.683614	-0.799583	-1.06185	-0.438985	-1.72674
AT3G29252	pseudo	-0.757857	-2.13687	-0.785997	-0.241843	-0.459638	0.496374	-0.346932	0.539292	AT1G79260	hypothetical protein	0.485328	0.463777	0.332995	1.65973	1.438	0.9606	0.885935	1.72127
AT3G29560	hypothetical protein	-0.92261	-1.07853	-1.53294	-0.718362	-0.143015	-0.483913	0.0104396	-0.0411047	AT1G79520	cation efflux family protein	0.323062	0.377417	0.826078	0.986171	0.869061	1.11798	0.94936	1.44086
AT3G29970	germination protein-related	1.94231	2.57524	2.95538	0.863281	0.66356	0.336679	0.834785	-2.88394	AT1G79580	ANAC033	-0.702612	-0.670254	-1.48504	-2.04194	-0.371851	-0.477589	-0.100424	-0.777832
AT3G30340	nodulin MtN21 family protein	-0.589582	-0.752254	-1.01235	-1.4855	-0.0714486	7.29536	-0.786401	-0.971012	AT1G79600	ABC1 family protein	-0.240293	-0.301127	-0.419795	-0.521591	-0.402733	-0.629959	-0.851792	-0.862244
AT3G30350	hypothetical protein	-0.873066	-0.548341	-1.50223	-1.96659	-0.265162	-0.212548	0.22158	-0.627936	AT1G79760	DTA4 (DOWNSTREAM TARGET OF AGL15-4)	-0.670949	-0.863471	-1.40473	-2.39179	-0.549117	-0.689121	-0.815124	-1.14299
AT3G30400	pseudo	-1.05415	-1.93564	-0.759985	-1.25967	-0.454754	-1.59408	-1.19693	-0.151071	AT1G80130	binding	3.05042	3.57268	6.37191	8.00775	4.02356	4.52915	5.47543	6.1502
AT3G30720	hypothetical protein	-0.192029	-0.461628	-1.09168	-1.04773	-0.131993	0.163271	-0.173462	-0.739174	AT1G80160	lactoylglutathione lyase family protein / glyoxalase I family protein	0.778552	0.761879	0.272538	-0.0988967	0.170319	-0.435605	-0.622032	-0.413176
AT3G30730	hypothetical protein	2.21721	2.58999	2.93783	2.57895	2.3673	1.04115	1.31672	0.383229	AT1G80340	GA4H (gibberellin 3 beta-hydroxylase); gibberellin 3-beta-dioxygenase	-0.281245	-0.485247	-0.663523	-1.50777	-1.33106	-1.19184	-1.64206	-1.88683
AT3G42180	catalytic/ transferase, transferring glycosyl groups	0.276756	0.578607	0.892542	1.20436	-0.0724709	-0.160271	-0.162793	0.532789	AT1G80570	F-box family protein (FBL14)	0.445191	0.307737	0.428579	0.757005	0.562609	0.702415	0.649758	1.0816
AT3G44300	NIT2 (NITRILASE 2)	0.961129	1.07791	1.76608	3.00201	0.553	0.0780603	0.516885	1.02569	AT1G80865	hypothetical protein	1.65949	2.6758	2.8516	2.55607	1.75607	1.4114	2.35046	1.87018
AT3G44310	ATNIT1/NIT1/NITI (NITRILASE 1); nitrilase	0.366639	0.510113	1.35798	1.23866	-0.191043	-0.130311	-0.465156	-0.249602	AT1G80920	J8; heat shock protein binding / unfolded protein binding	-0.16904	-0.348886	-0.390452	-0.766225	-0.175607	-0.356733	-0.71566	-1.00058
AT3G44326	hypothetical protein	-0.412644	-1.0802	-0.866463	-0.320994	0.270642	0.851913	-0.0230912	0.380598	AT2G01610	invertase/pectin methylesterase inhibitor family protein	1.70786	1.89454	2.00489	1.7859	0.937038	1.12698	1.64846	1.55932
AT3G44560	oxidoreductase, acting on the CH-CH group of donors	0.260261	0.326034	0.748565	1.10528	1.38977	0.484716	0.472271	1.38756	AT2G01900	endonuclease/exonuclease/phosphatase family protein	-0.854495	-0.832162	-1.39278	-1.93048	-0.464875	-1.19868	-1.49256	-1.12097
AT3G44700	hypothetical protein	-0.687047	-0.619583	-0.856868	-1.2384	-0.834237	-0.233034	-0.373599	-1.00188	AT2G01960	TET14 (TETRASPANIN14)	0.346797	0.468625	1.52339	1.31645	0.18181	1.27392	0.787004	0.479226
AT3G44710	hypothetical protein	-0.381707	-0.520951	-1.5227	-1.99085	-0.383781	-0.0465032	-0.216837	-0.856116	AT2G02020	proton-dependent oligopeptide transport (POT) family protein	-0.616791	-0.765063	-1.41925	-1.10961	-0.513402	-0.828554	-0.739606	-0.847792
AT3G45070	sulfotransferase family protein	-0.5267	-0.966714	-1.2058	-1.25452	-0.264472	0.0722632	-0.513855	-0.250155	AT2G02070	ATIDD5 (ARABIDOPSIS THALIANA INDETERMINATE(ID)-DOMAIN 5); nucleic acid binding / transcription factor/ zinc ion binding	-0.817961	-0.391544	-0.309203	-0.151174	-0.389914	-1.01393	-0.374681	-1.54631
AT3G45080	sulfotransferase family protein	-0.559588	-1.70609	-1.62623	-1.35376	-0.319098	0.379788	-0.547432	-0.182993	AT2G02120	LCR70/PDF2 (Low-molecular-weight cysteine-rich 70); protease inhibitor	1.01816	1.31533	1.19504	1.82094	1.67517	1.92655	2.47577	2.76243
AT3G45130	LAS1 (Lanosterol synthase 1); lanosterol synthase	0.505221	0.608805	1.68084	1.41609	-0.630093	-0.15668	-0.348313	0.0169476	AT2G02250	ATPP2-B2 (Phloem protein 2-B2); carbohydrate binding	0.99929	0.913831	1.02885	0.820239	0.182576	1.1215	0.718877	1.10905
AT3G45160	hypothetical protein	-0.4395	-0.349831	-0.878926	-1.66818	0.000521218	-0.536934	-0.530742	-1.40532	AT2G02820	MYB88 (myb domain protein 88); DNA binding / transcription factor	-0.00990397	-0.223744	-0.466154	-1.24107	-0.21761	0.0334807	-0.374835	-0.492587
AT3G45700	proton-dependent oligopeptide transport (POT) family protein	-0.716309	-1.72655	-2.76456	-3.20401	0.000150911	0.124867	-0.705778	-0.454648	AT2G03090	ATEXPA15 (ARABIDOPSIS THALIANA EXPANSIN A15)	1.017	1.23243	1.24411	1.32301	0.230674	1.28345	2.19471	2.31046
AT3G45840	protein binding / zinc ion binding	-0.617138	-0.634466	-0.828397	-1.36241	-0.419005	-0.722557	-0.759358	-0.864533	AT2G03210	FUT2 (fucosyltransferase 2); fucosyltransferase/ transferase, transferring glycosyl groups	0.253441	0.467287	0.591133	3.14517	2.77403	1.8133	1.6809	2.67654
AT3G46110	hypothetical protein	0.323528	0.702535	1.15938	0.994265	0.204782	0.129199	0.26467	0.280639	AT2G03360	hypothetical protein	0.240166	0.274301	0.525001	0.818973	0.574934	0.864563	0.553849	1.01307
AT3G46300	hypothetical protein	2.79744	2.19264	2.82914	2.79685	0.985275	1.57226	0.624115	1.41023	AT2G03720	MRH6 (morphogenesis of root hair 6)	-0.462668	-0.739517	-1.32984	-1.94504	-0.793231	-0.659389	-0.912601	-1.42253
AT3G46480	oxidoreductase, acting on paired donors, with incorporation or reduction of molecular oxygen, 2-oxoglutarate as one donor, and incorporation of one atom each of oxygen into both donors	0.425254	0.527354	0.58219	1.01238	0.899534	0.398396	0.268782	1.25029	AT2G03822	hypothetical protein	-1.07565	-0.400259	-0.862199	-0.872506	-0.803393	-0.728113	-0.987315	-1.77679
AT3G46650	UDP-glucoronosyl/UDP-glucosyl transferase family protein	-0.253211	-0.749816	-1.02471	-1.02635	0.395165	0.252168	0.215251	0.158355	AT2G04025	hypothetical protein	-0.497108	-0.525058	-1.04229	-1.87477	-0.175331	-0.527972	-0.129373	-0.969245
AT3G47050	glycosyl hydrolase family 3 protein	0.335554	0.170461	0.359387	0.378581	0.0983404	0.150908	-0.0187577	0.595352	AT2G04038	ATBZIP48 (ARABIDOPSIS THALIANA BASIC LEUCINE-ZIPPER 48); DNA binding / transcription factor	-1.76821	-2.18144	-2.82122	-3.38988	-1.48555	-1.9922	-3.02228	-3.83203
AT3G47380	invertase/pectin methylesterase inhibitor family protein	0.913985	0.832758	1.03545	1.02679	-0.109253	0.0572515	-0.172108	-0.230527	AT2G04040	ATDTX1; antiporter/ multidrug efflux pump/ multidrug transporter/ transporter	-2.28262	-1.90538	-1.4971	-0.560099	-1.39734	-1.85806	-0.881327	-1.35255
AT3G47480	calcium-binding EF hand family protein	0.977894	1.08141	1.7117	1.91435	0.270233	1.1881	0.783143	1.19949	AT2G04090	MATE efflux family protein	0.711218	0.884052	1.94869	2.30826	0.60802	1.36453	1.41652	1.89112
AT3G48130	pseudo	-1.00597	-0.767115	-0.739619	-0.659017	-0.670693	-0.301494	0.164156	-0.682061	AT2G04100	MATE efflux family protein	0.121057	0.0999175	0.644504	1.25255	0.304018	0.608587	0.781698	1.1764
AT3G48240	octicosapeptide/Phox/Bem1p (PB1) domain-containing protein	-0.809939	-1.30514	-1.44859	-2.18297	0.165177	0.313148	0.436987	0.373044	AT2G04190	meprin and TRAF homology domain-containing protein / MATH domain-containing protein	1.83371	1.93282	2.16052	1.73584	1.1571	1.33707	1.15844	1.82552
AT3G48260	WNK3 (Arabidopsis WNK kinase 3); kinase	-0.0762997	-0.271537	-1.27719	-1.30417	-0.126677	-0.0120821	0.0184178	-0.146889	AT2G04420	nucleic acid binding	1.45181	1.843	2.34666	2.71831	1.70434	2.20704	2.24497	2.19227
AT3G48280	CYP71A25 (cytochrome P450, family 71, subfamily A, polypeptide 25); oxygen binding	-0.98323	-0.916281	-0.828453	-1.27612	0.396474	-0.0584429	-0.0390335	0.444254	AT2G04515	hypothetical protein	1.12838	1.40616	2.3612	1.65343	0.811464	2.28063	1.67416	1.92031
AT3G48320	CYP71A21 (cytochrome P450, family 71, subfamily A, polypeptide 21); oxygen binding	0.660801	0.476884	0.95744	1.37038	0.538696	0.746198	0.0968536	1.08942	AT2G05270	hypothetical protein	-0.833019	-0.616287	-1.36063	-0.861239	-0.634569	-0.660964	-0.658625	-0.933269
AT3G48340	cysteine-type peptidase	-0.336097	-0.605176	-1.13376	-1.45758	-0.549164	-0.0552327	-0.49077	-1.09433	AT2G05530	glycine-rich protein	-1.66488	-1.04961	-1.20386	-1.47138	-0.577305	-1.04965	-1.36001	-0.99309
AT3G48460	GDSL-motif lipase/hydrolase family protein	0.540653	0.685925	1.05361	0.975877	0.0501448	0.115526	0.209413	-0.195567	AT2G05995	misc_RNA	-0.244053	-0.568159	-0.685229	-0.875375	-0.927136	-0.931	-1.50176	-1.44714
AT3G48570	protein transport protein SEC61 gamma subunit, putative	0.345912	0.323404	0.690566	1.40449	0.978496	0.448323	0.457623	0.930559	AT2G06050	OPR3 (OPDA-REDUCTASE 3); 12-oxophytodienoate reductase	0.49483	0.789103	1.5035	1.72576	0.505035	0.701542	0.547146	1.09055
AT3G49070	hypothetical protein	-0.425165	-0.356286	-0.763485	-1.31324	-0.13813	-0.294865	-0.340942	-0.85133	AT2G06985	pseudo	1.04855	1.0616	1.34782	3.00371	2.81337	1.98959	1.73196	3.02509
AT3G49160	pyruvate kinase family protein	-0.81843	-1.74218	-1.93405	-2.54907	-0.640793	0.73076	0.755487	0.774704	AT2G07712	pseudo	-0.632167	-0.547413	-0.844464	-0.827167	-1.03264	-1.31445	-0.982027	-1.5495
AT3G49190	condensation domain-containing protein	-0.263483	-0.627345	-1.53006	-1.90923	-0.690139	0.0591049	-0.285219	-0.497372	AT2G07739	hypothetical protein	-0.199856	0.00232445	0.117827	0.102239	-0.151316	-0.301838	-0.203881	-0.556905
AT3G49570	hypothetical protein	1.31307	1.4183	1.93504	3.00863	0.212832	-0.331032	-0.000626936	0.0141466	AT2G07786	pseudo	-0.655485	-0.247141	-0.302363	-0.138422	-0.416338	-1.3838	-1.13847	-1.41839
AT3G49580	hypothetical protein	2.05892	1.86004	1.65611	2.89774	1.75868	1.83619	1.03034	2.12414	AT2G07787	hypothetical protein	0.871064	1.01072	0.688535	0.79008	0.523782	0.810613	0.696652	0.536579
AT3G49620	DIN11 (DARK INDUCIBLE 11); oxidoreductase	-0.337125	-0.523858	-1.03135	-1.53346	-1.38074	-0.00870072	0.0112407	0.393832	AT2G11810	MGDC (monogalactosyldiacylglycerol synthase type C); 1,2-diacylglycerol 3-beta-galactosyltransferase	-0.333378	-1.19562	-1.21633	-0.832225	-0.918521	-1.05139	-1.15824	-1.06617
AT3G49700	ETO3 (ETHYLENE OVERPRODUCING 3); 1-aminocyclopropane-1-carboxylate synthase	-2.03442	-2.74842	-2.43161	-1.45111	-0.375994	0.464906	-1.20287	-2.09036	AT2G12190	cytochrome P450, putative	0.418332	0.22099	0.507326	1.00568	0.31383	0.340636	0.270186	0.993046
AT3G49970	phototropic-responsive protein, putative	1.19644	1.04393	1.34465	1.25636	0.00493237	1.42844	0.905744	1.29649	AT2G12646	hypothetical protein	-0.918192	-0.92828	-1.92485	-2.02852	-0.762695	-0.516482	-0.212018	-0.811038
AT3G50230	leucine-rich repeat transmembrane protein kinase, putative	0.00325894	0.294361	0.0128692	0.0721321	0.0158633	0.0947251	0.0115699	0.00859821	AT2G13810	ALD1 (AGD2-LIKE DEFENSE RESPONSE PROTEIN1); transaminase	1.40008	1.67606	2.03712	1.86116	0.823616	1.57995	0.779756	2.46844
AT3G50510	LBD28 (LOB DOMAIN-CONTAINING PROTEIN 28)	1.62258	1.79378	1.38584	0.915537	1.78432	1.79273	1.00722	1.13099	AT2G14160	nucleic acid binding	-1.90829	-1.87627	-1.90232	-1.88379	-1.88521	-1.91295	-1.89282	-1.87922
AT3G50640	hypothetical protein	-0.350755	-0.541605	-0.916536	-1.01903	0.107026	-0.074285	-0.320204	-0.845604	AT2G14210	ANR1; DNA binding / transcription factor	1.36951	1.36812	1.47118	0.712271	0.597556	1.08561	0.888584	0.684525
AT3G51075	misc_RNA	-0.294682	-0.424471	-1.06573	-1.32505	-0.109788	-0.163026	-0.0855403	-0.405472	AT2G14510	leucine-rich repeat protein kinase, putative	-0.606101	-0.624079	-0.588054	-0.841834	-1.07041	-1.38229	-1.97798	-1.46835
AT3G51895	SULTR3;1 (SULFATE TRANSPORTER 1); sulfate transmembrane transporter	-0.0838773	-0.248715	-0.675964	-1.32363	0.86439	0.357816	0.322712	0.570818	AT2G14820	phototropic-responsive NPH3 family protein	-0.638727	-0.78747	-1.63868	-1.86658	-0.742706	-0.392526	-0.447411	-0.707231
AT3G52440	Dof-type zinc finger domain-containing protein	-0.94314	-0.639194	-1.65238	-1.83475	-0.909298	-0.952727	-0.500066	-1.44496	AT2G14960	GH3	-0.548593	-0.545008	-1.33065	-1.76875	-0.518235	-0.46544	-0.451779	-1.27028
AT3G52460	hydroxyproline-rich glycoprotein family protein	-0.180661	-0.53697	-1.08756	-1.50095	-0.25025	0.0309426	-0.411188	-0.504132	AT2G15020	hypothetical protein	-0.214197	-0.7732	-0.755487	-1.28521	-0.328325	-1.15656	-1.25036	-1.20347
AT3G52670	F-box family protein	-0.268187	-0.639763	-1.18588	-0.80059	-0.0572196	-0.166725	-0.197495	-0.155772	AT2G15025	beta-galactosidase	-1.26155	-0.837736	-2.45186	-3.07402	-3.10339	-3.15274	-3.0979	-3.09853
AT3G52820	ATPAP22/PAP22 (purple acid phosphatase 22); acid phosphatase/ protein serine/threonine phosphatase	-0.177937	-0.60707	-1.24936	-2.1319	-0.085048	0.0058172	-0.827455	-0.761039	AT2G15220	secretory protein, putative	-1.06945	-0.960646	-0.414271	-0.431696	-0.862314	-0.68198	-0.788479	-0.72804
AT3G52830	hypothetical protein	-0.63474	-0.658893	-1.50276	-2.48868	-0.240091	-0.152797	-0.839651	-1.45878	AT2G15390	FUT4 (fucosyltransferase 4); fucosyltransferase	-0.54916	-0.793555	-1.10588	-1.34076	-0.617973	-0.209454	-0.703895	-0.607905
AT3G53100	GDSL-motif lipase/hydrolase family protein	-0.0633779	-0.216465	-0.679091	-1.42963	0.237625	0.12783	-0.00845776	-0.147211	AT2G16280	very-long-chain fatty acid condensing enzyme, putative	-0.414815	-0.161071	-0.0945034	-0.625667	-0.641348	-0.814705	-0.688957	-1.33438
AT3G53600	zinc finger (C2H2 type) family protein	-0.675064	-1.03882	-1.2141	-1.16985	-0.67008	-0.350748	-1.20469	-1.38761	AT2G16367	pseudo	0.688745	3.87879	5.36543	5.78169	3.66765	4.55377	5.82501	5.71782
AT3G54020	phosphatidic acid phosphatase-related / PAP2-related	0.557838	0.76853	1.08851	1.14365	0.310624	0.094879	0.0377966	-0.0551878	AT2G16700	ADF5 (ACTIN DEPOLYMERIZING FACTOR 5); actin binding	0.599524	0.961281	1.49317	1.6361	0.573809	0.515235	0.551911	0.544424
AT3G54070	ankyrin repeat family protein	-0.47418	-2.16638	-2.68261	-3.32295	-0.279043	-0.0627349	-0.921916	-1.1916	AT2G16740	UBC29 (UBIQUITIN-CONJUGATING ENZYME 29); ubiquitin-protein ligase	-0.494481	-0.285145	-0.734464	-1.00655	-0.292429	-0.513414	-0.461375	-0.886767
AT3G54363	hypothetical protein	0.123998	0.419984	0.940098	1.26323	0.29409	0.0506122	0.221018	-0.232987	AT2G16970	MEE15 (maternal effect embryo arrest 15); tetracycline transporter	-0.746522	-1.2533	-1.85504	-2.51206	-0.824325	-0.87708	-1.51746	-1.90895
AT3G54880	hypothetical protein	-0.405071	-0.585657	-0.748158	-1.0667	0.0284442	0.0385911	-0.0973682	-0.315619	AT2G16990	tetracycline transporter	0.634428	0.493485	0.502537	0.119464	0.900065	1.14344	1.00507	1.05742
AT3G54960	ATPDIL1-3 (PDI-LIKE 1-3); thiol-disulfide exchange intermediate	-0.506591	-0.300201	-0.360278	0.510914	0.304843	-0.218752	-0.18654	0.674224	AT2G17040	ANAC036 (Arabidopsis NAC domain containing protein 36); transcription factor	0.701197	1.77357	2.14697	1.79607	0.851694	1.55826	1.40494	1.3294
AT3G55100	ABC transporter family protein	0.519091	0.400391	0.665863	2.38115	1.63916	1.13433	0.692134	2.15426	AT2G17070	hypothetical protein	-0.60635	-0.669661	-1.16751	-1.71179	-1.08424	-0.802585	-0.931004	-1.90222
AT3G55120	A11/CFI/TT5 (TRANSPARENT TESTA 5); chalcone isomerase	-1.1478	-0.832522	-0.519671	-0.137919	0.0413163	-0.432128	-0.365721	-0.0233349	AT2G17080	hypothetical protein	-0.846467	-0.713323	-1.37876	-1.72066	-0.691488	-0.698569	-0.713704	-1.36908
AT3G55550	lectin protein kinase, putative	-0.689673	-0.390823	-1.04541	-1.66999	-0.144173	0.117416	0.433907	-0.234908	AT2G17120	LYM2 (LYSM DOMAIN GPI-ANCHORED PROTEIN 2 PRECURSOR)	0.458832	0.579654	0.908253	1.58911	0.804987	0.74652	0.711826	1.37007
AT3G55710	UDP-glucoronosyl/UDP-glucosyl transferase family protein	-0.675296	-0.512725	-1.25932	-1.47452	0.489078	-1.031	-0.74784	-0.959034	AT2G17430	ATMLO7/MLO7 (MILDEW RESISTANCE LOCUS O 7); calmodulin binding	-0.696905	-0.915581	-1.20616	-1.35312	-0.0843311	-0.101112	-0.197214	-0.228729
AT3G55790	hypothetical protein	-1.83444	-2.06587	-1.86305	-2.00081	0.514893	0.969063	1.85151	0.209573	AT2G17660	nitrate-responsive NOI protein, putative	1.92843	1.88288	3.04908	4.16541	0.303753	0.657759	1.33639	0.200538
AT3G56220	transcription regulator	-0.238298	-0.240677	-0.770831	-1.31268	-0.0560415	0.0307753	0.128464	-0.665791	AT2G17880	DNAJ heat shock protein, putative	-0.445885	-0.494466	-0.684834	-1.36631	-1.11369	-0.628356	-1.21232	-1.24046
AT3G56230	speckle-type POZ protein-related	-0.299589	-0.975111	-1.31366	-1.82344	-0.382408	-0.0245632	-0.526425	-0.651346	AT2G18010	auxin-responsive family protein	1.15802	1.20911	1.60134	3.52072	2.39293	1.71579	1.34315	1.92716
AT3G56260	hypothetical protein	1.07975	0.309526	0.919475	1.2477	0.347947	0.276132	0.0245692	0.663567	AT2G18050	HIS1-3 (HISTONE H1-3); DNA binding	1.20156	0.541111	1.47707	2.06857	3.4835	4.3756	4.7328	5.07768
AT3G56730	hypothetical protein	-0.339384	-0.452382	-0.651891	-1.15829	0.22184	0.0959362	-0.183046	-0.364621	AT2G18160	ATBZIP2/GBF5 (G-BOX BINDING FACTOR 5); DNA binding / protein heterodimerization/ transcription factor	-0.640109	-0.773376	-0.892644	-1.3581	-0.473495	-0.537738	-0.454563	-0.862011
AT3G56780	F-box family protein	-0.949906	-1.21521	-1.52939	-1.70155	-0.109356	-0.702905	-0.880018	-1.30737	AT2G18200	hypothetical protein	-0.813422	-1.33873	-0.830092	-0.201831	-0.156613	-0.240337	-0.748184	-0.392659
AT3G56800	CAM3 (CALMODULIN 3); calcium ion binding	0.103161	0.216142	0.333416	0.381923	-0.0170861	-0.0609792	-0.110346	-0.166937	AT2G18210	hypothetical protein	-0.903575	-1.41051	-0.886055	-0.268034	-0.320798	-0.426895	-0.816672	-0.690465
AT3G56891	metal ion binding	-0.321443	-0.607113	-1.02078	-1.41938	-0.117084	0.270203	-0.294031	-0.456922	AT2G18470	protein kinase family protein	0.507466	1.68872	1.4147	0.565106	1.05592	0.743239	2.26171	0.523419
AT3G57240	BG3 (BETA-1,3-GLUCANASE 3); hydrolase, hydrolyzing O-glycosyl compounds	1.54314	1.31425	0.796163	0.486463	-0.00248842	3.79958	3.12154	4.54595	AT2G18620	geranylgeranyl pyrophosphate synthase, putative / GGPP synthetase, putative / farnesyltranstransferase, putative	0.713176	0.466218	0.136169	0.119008	1.01025	0.976597	1.08689	1.35022
AT3G57440	hypothetical protein	1.59542	1.91176	1.86686	1.70775	1.41401	1.78156	1.8884	1.87165	AT2G18660	EXLB3 (EXPANSIN-LIKE B3 PRECURSOR)	0.839378	1.74697	2.18291	1.8609	0.85506	3.76648	3.88695	4.1379
AT3G57520	ATSIP2 (ARABIDOPSIS THALIANA SEED IMBIBITION 2); hydrolase, hydrolyzing O-glycosyl compounds	-1.2304	-0.951603	-1.27186	-1.50791	0.112952	-0.0744023	0.149691	0.0660099	AT2G18670	zinc finger (C3HC4-type RING finger) family protein	-0.873647	-0.694579	-0.410184	-0.356507	-0.908017	-1.26307	-0.804118	-1.31046
AT3G57640	protein kinase family protein	0.454638	0.529794	0.893935	1.28377	0.504574	0.37159	0.154967	0.51279	AT2G18680	hypothetical protein	-0.789939	-0.60809	-0.412062	-0.181173	-0.587029	-1.05231	-0.668091	-0.79068
AT3G57765	ncRNA	0.230225	0.438469	0.84991	1.85088	0.300764	0.285338	0.401814	0.757782	AT2G18690	hypothetical protein	-1.05528	-0.642359	-0.498043	-0.349008	-0.399091	-0.302021	-0.260499	-0.0653635
AT3G58060	cation efflux family protein / metal tolerance protein, putative (MTPc3)	0.723969	0.79486	1.19777	1.30341	2.01011	0.36852	0.456673	0.712778	AT2G18969	transcription regulator	1.50979	1.24468	1.43907	1.01214	0.228393	0.587132	0.469764	0.403403
AT3G59250	F-box family protein	-0.913142	-1.25237	-1.77102	-1.78351	0.018087	-0.509197	-0.414309	-0.059791	AT2G19150	pectinesterase family protein	-0.669049	-0.770759	-1.08461	-1.10837	-0.437575	-0.875943	-0.915607	-1.09831
AT3G59340	hypothetical protein	-0.762083	-2.17763	-0.903221	-0.160909	-0.565514	1.51092	0.720853	1.1009	AT2G19590	ACO1 (ACC OXIDASE 1); 1-aminocyclopropane-1-carboxylate oxidase	-0.713034	-0.52748	-1.00989	-2.1598	-0.554528	-1.04969	-1.06611	-1.71639
AT3G59690	IQD13 (IQ-domain 13); calmodulin binding	-0.363416	-0.478231	-0.685833	-1.02936	-0.0607587	-0.27993	-0.393919	-0.58256	AT2G19900	ATNADP-ME1 (NADP-MALIC ENZYME 1); malate dehydrogenase (oxaloacetate-decarboxylating) (NADP+)/ malic enzyme/ oxidoreductase, acting on NADH or NADPH, NAD or NADP as acceptor	0.404753	0.49771	1.20803	2.16397	1.64619	1.723	1.4425	2.22122
AT3G59820	calcium-binding mitochondrial protein-related	0.141808	0.322823	0.484227	1.0783	0.202008	0.125586	0.505035	0.6786	AT2G19970	pathogenesis-related protein, putative	1.19039	0.914263	0.913398	0.677976	0.585943	0.489021	0.610066	0.920914
AT3G59880	hypothetical protein	0.301602	0.853573	1.50419	1.86806	0.397683	0.216283	0.572848	0.659227	AT2G19990	PR-1-LIKE (PATHOGENESIS-RELATED PROTEIN-1-LIKE)	0.723739	0.659566	1.02276	0.722922	0.169782	0.24733	0.449479	0.496373
AT3G59930	hypothetical protein	-1.18582	-2.00266	-3.68808	-3.66634	0.479865	-2.65597	-3.29116	-4.37073	AT2G20562	hypothetical protein	-0.83081	-0.284546	-0.342635	-0.379555	-0.730865	-1.00265	-0.583375	-1.64609
AT3G60120	glycosyl hydrolase family 1 protein	-2.66393	-2.65368	-2.50656	-1.92409	-2.53408	-0.836959	0.997287	1.32685	AT2G20670	hypothetical protein	-0.288712	-0.285553	-0.604902	-1.37662	-0.355914	-0.570552	-0.989051	-1.81814
AT3G60210	chloroplast chaperonin 10, putative	-0.107236	-0.175222	-0.313786	-1.06307	-0.00994044	-0.0590768	-0.0881812	-0.266629	AT2G20835	hypothetical protein	0.845796	1.03368	1.27716	1.46685	1.05422	0.73996	1.10943	1.24558
AT3G60280	UCC3 (UCLACYANIN 3); copper ion binding	-0.690034	-1.07402	-1.46802	-1.66556	-0.235259	-0.376685	-0.685196	-1.50277	AT2G21180	hypothetical protein	0.151931	0.0550803	0.437251	0.995159	0.771739	0.620942	0.501789	1.02538
AT3G60330	AHA7 (ARABIDOPSIS H(+)-ATPASE 7); hydrogen-exporting ATPase, phosphorylative mechanism	-0.0594425	-0.438699	-1.06525	-1.60699	-0.420113	-0.0179692	-0.748672	-0.808149	AT2G21400	SRS3 (SHI-RELATED SEQUENCE3)	-1.12991	-0.797028	-1.106	-1.5814	-0.603283	-1.54479	-1.75251	-2.76743
AT3G61010	glycosyl hydrolase family protein 85	-0.5456	-0.540101	-1.21144	-1.06945	-0.159701	-0.1665	0.056892	-0.0518551	AT2G21490	LEA (DEHYDRIN LEA)	1.19049	0.969122	1.18064	3.36668	2.21613	1.70384	1.61812	2.572
AT3G61028	hypothetical protein	2.0185	1.87804	3.04357	2.59287	0.73634	1.54878	0.937135	0.962573	AT2G21560	hypothetical protein	-0.725075	-0.717648	-0.966985	-1.38457	-0.688708	-0.868319	-1.09617	-1.36902
AT3G61060	ATPP2-A13	-1.36995	-1.99121	-2.3542	-2.83906	0.0255201	-0.530442	-0.988322	-1.48471	AT2G21590	APL4 (large subunit of AGP 4); glucose-1-phosphate adenylyltransferase	0.733089	0.87345	1.61502	2.33367	0.982437	1.06036	1.6262	2.09032
AT3G62460	hypothetical protein	-0.642108	-0.930683	-1.18524	-0.969995	0.291343	0.0618067	0.324969	0.593156	AT2G21650	MEE3 (maternal effect embryo arrest 3); DNA binding / transcription factor	-1.4302	-3.98891	-4.22449	-5.27672	-5.21452	-3.36916	-4.51547	-4.67083
AT3G63060	EDL3 (EID1-LIKE 3)	1.05501	0.988385	1.17048	1.63742	0.266861	0.862482	0.631911	1.21989	AT2G21900	WRKY59 (WRKY DNA-binding protein 59); transcription factor	-2.95066	-2.05223	-2.96254	-2.52048	-3.50494	-2.20454	-3.05824	-2.34609
AT3G63350	AT-HSFA7B (Arabidopsis thaliana heat shock transcription factor A7B); DNA binding / transcription factor	-0.579462	-0.981154	-2.11327	-2.1644	0.0244713	1.02367	0.679121	0.114896	AT2G22060	hypothetical protein	-1.71175	-1.26488	-1.5892	-1.68441	-1.62176	-2.01973	-1.96411	-2.55382
AT3G63380	calcium-transporting ATPase, plasma membrane-type, putative / Ca(2+)-ATPase, putative (ACA12)	-0.855704	-1.1043	-1.60682	-1.67157	-0.160378	-0.146574	-0.329499	-0.159195	AT2G22125	binding	-1.25547	-0.526464	-0.5573	-0.69023	-1.00151	-1.83294	-0.748698	-2.67764
AT3G63510	FAD binding / catalytic/ tRNA dihydrouridine synthase	-0.205308	-0.411142	-0.901692	-1.26849	-0.384206	-0.0653021	-0.19954	-0.153453	AT2G22420	peroxidase 17 (PER17) (P17)	0.19329	0.456389	1.09953	1.10111	0.66401	0.602206	0.687209	0.611896
AT4G00005	pseudo	0.18425	0.828801	1.22822	0.872332	0.164028	-0.0352647	-0.335273	-0.703239	AT2G22630	AGL17 (AGAMOUS-LIKE 17); transcription factor	0.994161	0.885977	1.13486	1.08522	0.427042	0.872147	0.697755	0.998588
AT4G01140	hypothetical protein	-0.413597	-0.864873	-0.828183	-1.24174	-0.42219	0.479009	-0.0856802	-0.482181	AT2G22750	basic helix-loop-helix (bHLH) family protein	-0.71492	-1.75582	-1.15866	-1.92131	-1.01143	-0.982885	-2.05414	-1.9698
AT4G01430	nodulin MtN21 family protein	1.32064	1.27964	1.62758	1.94965	0.0732622	1.04045	1.13302	1.49608	AT2G22795	hypothetical protein	-0.130882	-0.515046	-0.428954	-0.679749	-0.104228	-0.365299	-0.4555	-0.89744
AT4G01533	misc_RNA	-1.59442	-0.667793	-1.2191	-1.29184	-0.261059	-0.32512	0.194025	-0.491901	AT2G22850	ATBZIP6 (ARABIDOPSIS THALIANA BASIC LEUCINE-ZIPPER 6); DNA binding / transcription factor	-0.60909	-0.70961	-0.775966	-1.16153	-0.47101	-0.557192	-0.691775	-0.928908
AT4G01930	DC1 domain-containing protein	-0.546285	-0.487375	-0.823993	-1.05606	-0.383492	-0.142667	0.071676	-0.226782	AT2G22990	SNG1 (SINAPOYLGLUCOSE 1); serine carboxypeptidase	-0.0862314	-0.260649	-0.224464	-0.632118	-0.419151	-0.644463	-1.00145	-1.18273
AT4G02520	ATGSTF2 (Arabidopsis thaliana Glutathione S-transferase (class phi) 2); glutathione transferase	-0.495959	-0.636928	-1.0632	-0.828088	-0.703261	-0.12711	-0.29034	0.239252	AT2G23000	SCPL10 (serine carboxypeptidase-like 10); serine carboxypeptidase	0.643962	0.861883	1.80587	2.28043	0.916122	0.468662	0.437733	1.07962
AT4G03050	AOP3 (2-oxoglutarate?dependent dioxygenase 3); oxidoreductase, acting on paired donors, with incorporation or reduction of molecular oxygen, 2-oxoglutarate as one donor, and incorporation of one atom each of oxygen into both donors	0.741147	2.07115	2.47812	2.52519	-1.16661	-0.33547	-0.473172	0.809022	AT2G23010	SCPL9; serine carboxypeptidase	1.1018	1.6646	2.54177	2.39949	1.15818	0.830991	0.898346	1.23034
AT4G03600	hypothetical protein	0.18055	0.228768	0.534888	1.20365	0.767671	0.230833	0.33579	0.331989	AT2G23050	phototropic-responsive NPH3 family protein	-0.901799	-0.616291	-1.58912	-2.09047	-0.76963	-0.551883	-0.209704	-0.872978
AT4G04030	ATOFP9/OFP9 (Arabidopsis thaliana ovate family protein 9)	-0.210063	-0.970424	-1.7607	-2.11142	-0.621853	-0.027725	-0.776338	-0.881832	AT2G23060	GCN5-related N-acetyltransferase (GNAT) family protein	-1.14969	-1.5311	-2.24907	-2.32354	-0.832824	-0.929786	-1.34202	-1.44684
AT4G04490	protein kinase family protein	0.695027	0.838335	1.02938	0.982568	-0.327723	1.18196	0.430537	1.11308	AT2G23120	hypothetical protein	0.78812	1.13578	1.27503	1.69233	1.18258	0.958865	0.849191	0.897818
AT4G04500	protein kinase family protein	2.30251	2.64412	2.89249	2.23384	0.197967	3.17031	1.49618	1.8038	AT2G23210	UDP-glycosyltransferase/ transferase, transferring glycosyl groups	1.72642	1.44353	1.72081	2.17392	2.05202	1.94841	1.49725	2.69298
AT4G04510	protein kinase family protein	1.60744	2.25149	2.97156	2.42632	0.0483954	2.58692	1.20281	1.71968	AT2G23260	UGT84B1 (UDP-GLUCOSYL TRANSFERASE 84B1); UDP-glycosyltransferase/ abscisic acid glucosyltransferase/ indole-3-acetate beta-glucosyltransferase/ transferase, transferring glycosyl groups	-2.93078	-2.96106	-2.95941	-2.95348	-2.96591	-2.97262	-2.90432	-2.95496
AT4G04900	RIC10 (ROP-INTERACTIVE CRIB MOTIF-CONTAINING PROTEIN 10)	-0.142897	-0.549512	-0.904725	-1.29826	-0.538351	-0.126161	-0.5912	-0.850063	AT2G23560	hydrolase, alpha/beta fold family protein	-0.219579	-0.503522	-0.518414	-0.522269	-0.228932	-0.673545	-0.993369	-0.727067
AT4G04990	hypothetical protein	-0.565756	-0.866883	-1.02198	-1.21912	-0.243691	-0.403744	-0.46219	-1.59073	AT2G23630	SKS16 (SKU5 Similar 16); copper ion binding / pectinesterase	-0.581359	-0.320363	-1.2727	-1.69795	-0.510768	-0.344435	-0.147437	-0.636925
AT4G05100	AtMYB74 (myb domain protein 74); DNA binding / transcription factor	-0.449543	-1.10945	-0.656063	-0.609959	0.19851	0.508483	-0.0758805	0.0180916	AT2G23840	HNH endonuclease domain-containing protein	-0.278775	-0.733637	-0.736083	-1.09968	-0.288473	-0.574636	-0.952324	-0.985217
AT4G07670	protease-associated (PA) domain-containing protein	-0.569302	-0.636115	-0.598523	-0.600827	-0.602865	-0.647277	-0.574747	1.48617	AT2G24130	leucine-rich repeat transmembrane protein kinase, putative	-1.36475	-1.9132	-3.71378	-4.92225	-1.67002	-0.987826	-2.00244	-3.36457
AT4G08040	ACS11 (1-Amino-cyclopropane-1-carboxylate synthase 11); 1-aminocyclopropane-1-carboxylate synthase	-1.08641	-1.3746	-0.678143	-0.604182	-0.321575	0.285124	-0.372162	-0.666457	AT2G24300	calmodulin-binding protein	-0.397726	-0.266712	-1.07274	-1.4359	-0.429123	-0.378	-0.18556	-0.897229
AT4G09110	zinc finger (C3HC4-type RING finger) family protein	-0.151813	-0.956678	-1.42293	-3.02	0.391674	-1.00586	-2.06533	-2.54214	AT2G24400	auxin-responsive protein, putative / small auxin up RNA (SAUR_D)	-0.322276	-0.365691	-1.37552	-2.02461	-0.677982	-0.617044	-0.682693	-1.48093
AT4G10010	protein kinase family protein	-0.693299	-1.6011	-3.53689	-3.98414	-0.969837	-0.510252	-1.78573	-1.83556	AT2G24560	carboxylesterase	0.468776	0.534384	1.00408	1.73336	0.552678	0.660289	0.600947	0.377663
AT4G10640	IQD16 (IQ-domain 16); calmodulin binding	-0.147939	-0.183575	-0.78434	-1.03537	-0.0398286	0.0802273	0.474281	0.0507452	AT2G24610	ATCNGC14 (cyclic nucleotide gated channel 14); calmodulin binding / cyclic nucleotide binding / ion channel	-0.483935	-0.217347	-0.589523	-0.93329	-0.426438	-0.411114	-0.110191	-1.30438
AT4G10650	GTP-binding family protein	0.0871235	0.282761	0.35647	1.57897	1.16171	0.178081	0.772365	1.62847	AT2G24692	hypothetical protein	-0.49153	-0.240169	-0.310321	-0.776572	-0.436711	-0.745567	-0.313396	-1.25849
AT4G10720	ankyrin repeat family protein	0.656097	0.77925	1.20878	1.42646	0.548775	0.719123	0.727179	1.34835	AT2G24720	ATGLR2 (Arabidopsis thaliana glutamate receptor 2)	0.796776	0.962424	0.99963	0.785529	0.394146	0.415355	0.285036	1.09281
AT4G11210	disease resistance-responsive family protein / dirigent family protein	-0.878014	-2.58823	-0.961912	-0.617138	-0.733509	0.735091	0.00399046	0.199822	AT2G24850	TAT3 (TYROSINE AMINOTRANSFERASE 3); transaminase	1.86233	2.45011	4.55328	3.8959	0.696402	3.21413	1.60727	4.31856
AT4G11310	cysteine proteinase, putative	-0.250787	-1.00797	-0.754597	-0.629202	1.01352	0.757512	0.232827	0.601653	AT2G25080	ATGPX1 (GLUTATHIONE PEROXIDASE 1); glutathione peroxidase	-0.240573	-0.415376	-0.515117	-0.683015	0.130335	-0.329187	-0.401886	-0.570241
AT4G11320	cysteine proteinase, putative	-0.323822	-0.967477	-0.788741	-1.14603	0.342681	0.432264	0.0270399	-0.0252445	AT2G25130	armadillo/beta-catenin repeat family protein	-0.142272	-0.308294	-0.736277	-1.28686	-0.388244	-0.113629	-0.28456	-0.44176
AT4G11340	Toll-Interleukin-Resistance (TIR) domain-containing protein	-1.03455	-1.21659	-1.11493	-1.26945	-0.906882	-0.833247	0.379876	-1.16879	AT2G25410	protein binding / zinc ion binding	-0.668945	-0.610395	-1.02741	-1.63529	-1.4417	-2.02608	-2.55448	-2.50613
AT4G11470	protein kinase family protein	-1.28988	-1.69221	-1.44023	-1.24749	-0.208147	0.770703	1.32073	1.60788	AT2G25470	leucine-rich repeat family protein	0.258979	1.03677	3.40697	4.03366	1.9185	3.58026	3.73516	4.39871
AT4G11810	SPX (SYG1/Pho81/XPR1) domain-containing protein	1.59694	1.67444	2.25462	2.46712	0.239827	0.873353	0.815679	1.28493	AT2G25625	hypothetical protein	1.53486	0.130679	1.97717	2.8567	1.85162	3.17895	3.51352	2.44311
AT4G12000	hypothetical protein	0.571835	0.698947	1.19621	0.997156	-0.0827945	0.29995	0.152683	-0.0585333	AT2G25680	MOT1 (MOLYBDATE TRANSPORTER 1); molybdate ion transmembrane transporter/ sulfate transmembrane transporter	0.909283	0.740633	0.574533	0.492123	1.27925	1.28428	1.24327	1.42929
AT4G12400	stress-inducible protein, putative	-0.850598	-0.737073	-0.983023	-1.20282	-0.00348585	-0.314367	-0.212949	-0.214262	AT2G25735	hypothetical protein	-0.721997	-0.825954	-0.83393	-0.776975	-0.327821	-0.882014	-1.02135	-0.838595
AT4G12510	protease inhibitor/seed storage/lipid transfer protein (LTP) family protein	-0.688745	-1.5172	-1.46772	-1.72146	-0.154944	0.0572707	-0.179423	-0.657776	AT2G25780	hypothetical protein	-1.24429	-1.65577	-1.15972	-0.906009	-1.5174	-1.3666	-1.64071	-1.67232
AT4G12520	protease inhibitor/seed storage/lipid transfer protein (LTP) family protein	-0.599184	-1.32923	-1.37095	-1.62138	-0.179379	0.0594036	-0.289517	-0.615177	AT2G25900	ATCTH (Arabidopsis thaliana Cys3His zinc finger protein); transcription factor	-0.474692	-0.397267	-0.678296	-1.18267	-1.3402	-1.65484	-1.83579	-2.64497
AT4G12640	RNA recognition motif (RRM)-containing protein	-0.269167	-0.223321	-0.399015	-0.605081	-0.260924	-0.118439	-0.195765	-0.1418	AT2G26010	PDF1 (plant defensin 1)	-0.894025	-2.14993	-2.80016	-2.4528	-2.67649	-2.22808	-1.9651	-1.93169
AT4G12735	hypothetical protein	0.956944	1.82973	1.712	2.21578	0.93916	0.241801	-1.23327	0.322347	AT2G26020	PDF1b (plant defensin 1b)	-1.05563	-2.89095	-4.1429	-5.01134	-3.99031	-3.2605	-2.93591	-2.84715
AT4G13280	ATTPS12/TPS12 (TERPENOID SYNTHASE12); cyclase	-0.66005	-0.629794	-1.27421	-2.0093	0.59778	-0.0354359	-0.191184	-1.33325	AT2G26040	Bet v I allergen family protein	-0.40156	-0.364893	-0.833443	-1.48153	-0.537288	-0.890411	-0.592177	-1.21725
AT4G13300	ATTPS13/TPS13 (TERPENOID SYNTHASE13); cyclase	-0.727537	-0.750166	-1.39784	-1.90599	0.797107	-0.178287	-0.226958	-1.20902	AT2G26080	ATGLDP2 (ARABIDOPSIS THALIANA GLYCINE DECARBOXYLASE P-PROTEIN 2); glycine dehydrogenase (decarboxylating)	-0.530437	-0.578522	-0.827657	-1.00331	-0.470508	-0.552695	-0.701984	-0.8068
AT4G13310	CYP71A20 (cytochrome P450, family 71, subfamily A, polypeptide 20); oxygen binding	-1.08292	-0.683409	-0.467318	-0.302604	0.23431	-0.873883	-1.01671	-1.81998	AT2G26390	serpin, putative / serine protease inhibitor, putative	0.521986	0.422885	0.67597	0.236433	0.344284	1.25526	0.970313	0.832742
AT4G13494	misc_RNA	-0.185795	-0.74177	-1.08334	-0.886951	-0.357892	-0.114627	-0.0587934	0.0331181	AT2G26440	pectinesterase family protein	-0.685616	-0.445542	-0.59158	-0.465754	-1.05053	-0.835215	-0.78996	-0.707578
AT4G13890	SHM5 (SERINE HYDROXYMETHYLTRANSFERASE 5); glycine hydroxymethyltransferase	-0.160571	-0.605678	-1.17264	-1.67821	-0.533159	-0.0358499	-0.369945	-0.245786	AT2G26560	PLP2 (PHOSPHOLIPASE A 2A); nutrient reservoir	-1.45925	-1.52402	-2.51589	-2.72183	-1.49321	-1.57291	-1.70189	-1.19986
AT4G13960	F-box family protein	-1.22336	-1.20565	-1.19838	-1.19582	-0.655605	0.799053	-1.20671	-1.1494	AT2G26820	ATPP2-A3 (Phloem protein 2-A3); carbohydrate binding	-0.356196	-0.329099	-0.407495	-0.502745	-1.18258	-0.855495	-1.30373	-1.17012
AT4G14130	XTR7 (XYLOGLUCAN ENDOTRANSGLYCOSYLASE 7); hydrolase, acting on glycosyl bonds	-1.05605	-1.36633	-1.83447	-2.39942	0.340237	-0.321548	-0.912067	-0.829085	AT2G26890	GRV2 (KATAMARI2); binding / heat shock protein binding	-0.299153	0.0317135	0.00913487	0.594837	0.304542	-0.29476	0.134954	-0.48428
AT4G14358	hypothetical protein	-0.689915	-0.816645	-1.07949	-1.56292	0.748188	0.377022	-0.086932	-0.25128	AT2G27395	pseudo	-0.902039	-1.64773	-1.44654	-1.55602	-1.24782	-0.710032	-1.28631	-1.14116
AT4G14450	hypothetical protein	-1.05256	-1.14971	-0.635471	-0.361091	-0.881422	-0.381666	0.0574306	0.473774	AT2G27420	cysteine proteinase, putative	-0.882404	-1.62833	-1.53558	-1.52218	-0.988745	-0.650144	-1.2081	-0.749075
AT4G14640	CAM8 (CALMODULIN 8); calcium ion binding	-0.394369	-0.847043	-1.62036	-1.90913	-0.327396	0.0529226	-0.720648	-0.543393	AT2G28140	hypothetical protein	0.66239	1.14952	1.5944	1.56591	0.591199	0.300009	0.514767	0.410661
AT4G14695	hypothetical protein	-1.14189	-0.939212	-1.46256	-1.40778	-0.293705	-0.194904	0.232335	-1.05765	AT2G28400	hypothetical protein	0.703512	0.874462	1.45079	1.5599	0.560418	0.611823	0.65165	0.535544
AT4G14819	hypothetical protein	1.92818	1.55038	1.30914	0.749795	0.603311	1.21431	0.252299	1.07264	AT2G28500	LBD11 (LOB DOMAIN-CONTAINING PROTEIN 11)	0.509192	1.09502	1.51322	1.72639	0.597641	0.213611	0.387162	0.414244
AT4G14940	ATAO1 (Arabidosis thaliana amine oxidase 1); copper ion binding	-0.0901041	-0.307192	-1.04006	-1.63188	-0.0949686	0.122382	-0.133615	-0.0451233	AT2G28570	hypothetical protein	-1.01309	-0.80204	-1.1201	-0.60374	-0.114775	-0.680934	-0.305481	-1.13702
AT4G15290	ATCSLB05 (Cellulose synthase-like B5); transferase/ transferase, transferring glycosyl groups	-0.354119	-1.09611	-1.97365	-2.53749	-0.189398	-0.0605464	-0.887498	-0.568836	AT2G28650	ATEXO70H8 (exocyst subunit EXO70 family protein H8); protein binding	0.43837	0.509616	0.789705	1.02907	0.217521	0.178425	0.196373	0.570387
AT4G15300	CYP702A2 (cytochrome P450, family 702, subfamily A, polypeptide 2); oxygen binding	-0.232757	-0.528255	-1.40831	-1.64517	-0.731579	-0.187286	-0.0642413	0.0174842	AT2G29340	short-chain dehydrogenase/reductase (SDR) family protein	0.298297	0.431342	1.18052	1.31342	0.370018	0.938668	0.88343	1.20175
AT4G15960	epoxide hydrolase, putative	-0.361427	-0.61271	-1.23687	-1.31377	0.283826	0.177287	-0.262416	-0.0474936	AT2G29450	ATGSTU5 (Arabidopsis thaliana Glutathione S-transferase (class tau) 5); glutathione transferase	0.857443	0.698046	1.18644	1.2173	0.193818	0.570833	0.288046	0.559685
AT4G16260	glycosyl hydrolase family 17 protein	-1.10683	-0.971875	-1.32268	-1.58083	-0.255164	-0.607599	-0.763606	-0.0467299	AT2G29500	17 kDa class I small heat shock protein (HSP17B-CI)	0.753776	0.725958	1.23562	1.39633	0.790037	1.60867	1.6712	2.06498
AT4G16563	aspartyl protease family protein	-1.08373	-0.180085	-0.425606	-0.431889	-0.0271251	-0.71549	-0.81037	-1.05638	AT2G29670	binding	-0.542947	-1.04552	-0.837254	-0.701269	-0.551267	-0.928436	-1.11023	-1.21087
AT4G17220	ATMAP70-5 (microtubule-associated proteins 70-5); microtubule binding	-0.105978	-0.447531	-0.916315	-1.41687	-0.00145264	0.2403	-0.0915668	-0.0684279	AT2G29680	CDC6	-0.108145	-0.645008	-0.930497	-1.23449	-0.392957	-0.423493	-0.814454	-0.748351
AT4G17460	HAT1 (homeobox-leucine zipper protein 1); DNA binding / transcription factor	-0.781838	-0.917234	-1.09274	-1.11922	0.633267	0.178548	0.332101	0.195152	AT2G29980	FAD3 (FATTY ACID DESATURASE 3); omega-3 fatty acid desaturase	-0.925879	-0.306869	-0.262955	-0.388772	-0.741096	-1.40956	-0.382216	-2.41972
AT4G17490	ATERF6 (ETHYLENE RESPONSIVE ELEMENT BINDING FACTOR 6); DNA binding / transcription factor	-0.953387	-0.844602	-0.714697	-0.663445	0.408197	-0.229647	-0.341779	-0.289429	AT2G30130	ASL5 (phosphoenolpyruvate carboxykinase1)	-0.672174	-0.580127	-1.26904	-1.86159	-0.838054	-0.845338	-0.633529	-1.74288
AT4G18170	WRKY28 (WRKY DNA-binding protein 28); transcription factor	0.346113	0.334992	1.21899	1.42019	-0.227998	-0.0237726	0.0806028	0.42577	AT2G30340	LBD13 (LOB DOMAIN-CONTAINING PROTEIN 13)	-0.656407	-0.685359	-1.43711	-1.85617	-1.16236	-0.564643	-0.79107	-1.1813
AT4G18210	ATPUP10 (Arabidopsis thaliana purine permease 10); purine transmembrane transporter	-0.089369	0.0078115	0.507304	0.619963	0.281441	0.350248	0.206189	0.325225	AT2G30400	ATOFP2/OFP2 (ARABIDOPSIS THALIANA OVATE FAMILY PROTEIN 2)	-0.316748	-0.5776	-0.796343	-1.29495	-0.200066	-0.31688	-0.63851	-0.756646
AT4G18690	hypothetical protein	0.535296	1.13143	2.29749	3.80213	-0.0254381	2.48729	4.26681	3.99506	AT2G30600	BTB/POZ domain-containing protein	-1.43645	-1.35126	-1.56836	-1.81742	-0.822359	-1.12714	-1.17395	-1.44854
AT4G18890	brassinosteroid signalling positive regulator-related	0.126322	0.54793	1.00565	2.12752	0.426564	0.0768676	0.644531	0.0874315	AT2G30790	PSBP-2 (photosystem II subunit P-2); calcium ion binding	0.902341	0.856355	0.89385	1.05336	1.39251	1.02495	0.751545	0.983221
AT4G19200	proline-rich family protein	0.651425	0.750873	1.13836	1.38619	0.280065	0.228309	-0.0284876	0.244109	AT2G31010	protein kinase family protein	-0.85767	-0.123206	-0.526978	-0.96603	-0.690913	-1.23428	-0.683236	-1.59831
AT4G19370	hypothetical protein	-0.575852	-0.659275	-0.682865	-1.09184	-0.0684832	-0.504189	-0.798896	-0.412415	AT2G31310	LBD14 (LOB DOMAIN-CONTAINING PROTEIN 14)	-0.355006	-1.3372	-2.02403	-3.0876	-0.670656	-0.360152	-0.970769	-1.29577
AT4G19515	disease resistance family protein	0.41467	1.04222	0.969492	1.03852	0.0168638	0.473426	0.132049	0.473459	AT2G31470	F-box family protein	0.916229	1.0995	0.773844	0.899531	1.26691	1.04441	1.02715	0.99787
AT4G19680	IRT2 (iron-responsive transporter 2); iron ion transmembrane transporter/ zinc ion transmembrane transporter	-0.542676	-1.0645	-1.46338	-1.57489	0.473688	0.167878	-0.813852	-0.593731	AT2G31730	ethylene-responsive protein, putative	-0.194645	0.268667	0.720524	0.810706	-0.185182	-0.655659	-0.444294	-0.804449
AT4G19690	IRT1 (IRON-REGULATED TRANSPORTER 1); cadmium ion transmembrane transporter/ iron ion transmembrane transporter/ manganese ion transmembrane transporter/ zinc ion transmembrane transporter	1.32016	0.989913	2.52942	3.34639	3.02103	0.832123	-0.405132	1.58911	AT2G31920	hypothetical protein	0.892988	0.786997	0.632617	0.40073	1.03761	0.964409	1.20411	1.05506
AT4G20320	hypothetical protein	0.428484	1.41668	2.06856	3.09325	1.06213	0.848898	1.64445	1.03645	AT2G32160	hypothetical protein	-0.632137	-1.10406	-2.1183	-3.00562	0.146473	-0.527648	-1.73512	-1.53705
AT4G20362	misc_RNA	-0.956536	-1.23909	-1.29667	-3.33822	-0.893776	-0.845687	-0.103661	-2.1818	AT2G32200	hypothetical protein	2.31524	4.00764	5.32691	5.40439	2.43132	3.04918	2.9429	2.37821
AT4G21323	subtilase family protein	-0.487656	-0.530994	-1.23871	-1.34697	0.0791117	-0.142276	0.117647	-0.510574	AT2G32210	hypothetical protein	0.96811	2.17643	3.2075	3.75151	1.28362	1.17148	1.59499	1.64847
AT4G21326	ATSBT32; subtilase	-0.193009	-0.418728	-1.1836	-0.979296	-0.00716443	-0.361678	-0.449531	-0.63937	AT2G32530	ATCSLB03 (Cellulose synthase-like B3); transferase/ transferase, transferring glycosyl groups	1.19838	1.75198	2.11292	2.3047	1.9234	2.90998	2.87774	3.45201
AT4G21590	ENDO3 (ENDONUCLEASE 3)	-0.516149	-0.421952	-0.778692	-1.09685	-0.206604	-0.269504	-0.0675694	-0.190747	AT2G32540	ATCSLB04 (Cellulose synthase-like B4); transferase/ transferase, transferring glycosyl groups	1.10932	0.953675	1.42632	1.57131	0.876912	1.48521	1.07592	1.65453
AT4G21780	hypothetical protein	1.14397	1.17255	1.23469	0.882283	0.0873004	0.0670677	0.118772	0.358098	AT2G32765	SUM5 (SUMO 5)	0.733927	0.795096	0.952512	1.03243	0.530085	0.58154	0.809728	0.835804
AT4G21970	hypothetical protein	-0.741736	-1.12846	-1.21759	-1.50642	0.0189434	-0.588486	-0.371826	-0.997742	AT2G32790	ubiquitin-conjugating enzyme, putative	1.1936	1.66396	1.94052	2.39323	1.53741	1.96823	1.94037	1.88822
AT4G22210	LCR85 (Low-molecular-weight cysteine-rich 85)	3.62051	2.10548	5.10552	3.98879	1.89352	2.09108	-0.208042	0.7471	AT2G33050	leucine-rich repeat family protein	-0.474103	-0.94023	-0.971897	-1.23798	-0.900413	-0.849911	-1.21453	-1.12403
AT4G22235	hypothetical protein	-0.442857	-0.454057	-1.02428	-0.90101	0.114747	-0.0133283	0.219471	-0.374922	AT2G33280	integral membrane transporter family protein	1.15351	1.2005	1.37928	1.48524	1.20348	1.80425	1.82444	2.21437
AT4G22505	pseudo	1.15635	1.25833	0.619059	0.142507	-0.533811	0.669369	1.25248	0.743834	AT2G33380	RD20 (RESPONSIVE TO DESSICATION 20); calcium ion binding	2.25975	2.57102	3.56561	3.42468	4.08703	3.64338	2.95252	2.98808
AT4G22510	hypothetical protein	1.75194	1.23677	2.01103	0.650806	-0.410615	1.54481	1.51988	1.7192	AT2G33550	gt-2-related	0.383684	0.605949	0.728384	0.345742	0.0255659	0.292373	0.40849	0.447313
AT4G22513	hypothetical protein	1.43761	1.26172	1.1689	1.58674	-0.438255	1.32746	1.87411	1.66611	AT2G33790	pollen Ole e 1 allergen and extensin family protein	1.69153	1.27516	0.591459	0.694872	1.22964	1.55555	1.81624	1.33816
AT4G22517	hypothetical protein	1.40998	1.1801	1.0178	1.0692	-0.69339	0.965222	1.52507	1.09992	AT2G34020	calcium ion binding	-0.897548	-0.914027	-1.88639	-1.85146	-0.570863	-0.516425	-0.469475	-0.738951
AT4G22520	protease inhibitor/seed storage/lipid transfer protein (LTP) family protein	1.30857	0.992437	0.739581	0.197012	-0.905073	0.903634	1.2163	0.975193	AT2G34060	peroxidase, putative	-0.675046	-0.865741	-1.25098	-1.6308	-0.557301	-0.803174	-0.808233	-1.03502
AT4G22690	CYP706A1 (cytochrome P450, family 706, subfamily A, polypeptide 1); oxygen binding	-0.690916	-1.25161	-1.38301	-2.01925	-1.21153	-0.81084	-1.40569	-0.738183	AT2G34180	CIPK13 (SNF1-RELATED PROTEIN KINASE 3); kinase	-1.0217	-0.918895	-1.40146	-2.45677	-1.29574	-1.00629	-1.38924	-0.717823
AT4G23150	protein kinase family protein	1.78355	2.43719	2.22576	1.29413	-0.444948	3.2043	2.2206	3.38817	AT2G34330	hypothetical protein	-0.129746	-0.827475	-1.47778	-2.76402	-0.397826	-0.408048	-1.47727	-1.47684
AT4G23210	CRK13/HIG1	0.406333	0.704289	1.63559	1.95852	-0.51863	0.476203	-0.0274067	0.193777	AT2G34580	hypothetical protein	1.16529	1.39754	1.27191	1.02937	0.693745	1.35806	1.86958	1.21102
AT4G23280	protein kinase, putative	-1.57351	-0.875501	-1.37586	-0.841134	-0.44038	2.04873	2.45258	3.1976	AT2G34600	JAZ7/TIFY5B (JASMONATE-ZIM-DOMAIN PROTEIN 7)	0.391046	0.706581	2.17906	1.99819	1.72141	1.64671	1.63377	0.537108
AT4G23520	cysteine proteinase, putative	1.60217	2.05599	1.7028	1.26512	1.24591	1.31696	2.27118	2.69859	AT2G34930	disease resistance family protein	1.30352	1.98985	2.35952	2.06827	0.923544	0.97999	0.757451	0.634378
AT4G23810	WRKY53 (WRKY DNA-binding protein 53); DNA binding / protein binding / transcription activator/ transcription factor	-0.463737	-0.268797	-0.0234882	-0.332825	0.0371224	0.156911	0.293146	0.582235	AT2G35070	hypothetical protein	3.01545	2.80143	4.05137	4.29019	3.68637	4.74498	4.80224	5.34219
AT4G24430	lyase	-0.139219	-0.14665	-0.811674	-1.16347	-0.187536	0.27744	-0.0386596	0.172061	AT2G35300	late embryogenesis abundant group 1 domain-containing protein / LEA group 1 domain-containing protein	2.27133	2.36415	1.97787	4.97121	2.3853	2.99623	3.74688	4.34776
AT4G24580	pleckstrin homology (PH) domain-containing protein-related / RhoGAP domain-containing protein	-0.236977	-0.410011	-1.35667	-1.66102	-0.858791	-0.0306109	-0.41068	-0.631144	AT2G35612	hypothetical protein	1.21183	1.76417	2.23703	2.41206	2.78129	2.71636	2.79631	3.82539
AT4G25010	nodulin MtN3 family protein	0.305918	0.560585	1.48574	2.82413	0.450348	2.29534	1.99039	2.45554	AT2G35730	heavy-metal-associated domain-containing protein	-0.902119	-0.939854	-1.04323	-1.07377	-1.10596	-1.06632	-1.50035	-1.8825
AT4G25090	respiratory burst oxidase, putative / NADPH oxidase, putative	-0.175195	-0.845578	-0.987854	-1.10037	-0.622011	-0.0962056	-0.677922	0.347016	AT2G35770	SCPL28 (serine carboxypeptidase-like 28); serine carboxypeptidase	-0.925666	-0.961819	-0.889587	-1.023	-0.621764	-0.578196	-0.727883	-1.02272
AT4G25100	FSD1 (FE SUPEROXIDE DISMUTASE 1); iron superoxide dismutase	-0.504195	-0.111801	0.143402	-0.351292	0.572948	1.35577	0.638468	0.168567	AT2G35950	EDA12 (embryo sac development arrest 12)	0.794934	0.992335	1.50177	1.52827	1.38815	1.50196	1.50276	1.62829
AT4G25160	protein kinase family protein	-0.12909	-0.398479	-1.23158	-1.69177	-0.255179	-0.0275231	-0.569107	-0.326336	AT2G36270	ABI5 (ABA INSENSITIVE 5); DNA binding / transcription activator/ transcription factor	0.478577	0.802377	0.790925	1.15575	0.594455	1.26921	1.68069	1.95983
AT4G25400	basix helix-loop-helix (bHLH) family protein	-0.732068	-1.25966	-0.80725	-0.535627	-0.309481	0.302278	-0.300988	0.0849845	AT2G36610	ATHB22 (ARABIDOPSIS THALIANA HOMEOBOX PROTEIN 22); DNA binding / transcription factor	0.39371	0.505461	0.735903	0.344683	-0.201504	0.49514	0.461783	0.547648
AT4G25433	peptidoglycan-binding LysM domain-containing protein	1.36859	0.901314	1.28023	1.24609	0.731265	1.09106	0.638732	0.99642	AT2G36640	ATECP63 (EMBRYONIC CELL PROTEIN 63)	2.75599	3.99329	4.76276	7.06836	4.45705	4.97318	5.53486	6.45842
AT4G25490	CBF1 (C-REPEAT/DRE BINDING FACTOR 1); DNA binding / transcription activator/ transcription factor	1.90298	1.29803	2.095	2.31392	0.0772949	0.167726	-0.213062	0.667077	AT2G36650	hypothetical protein	0.328671	0.391376	0.519885	0.742374	0.740321	0.972427	0.724658	1.10319
AT4G26260	MIOX4 (MYO-INOSITOL OXYGENASE 4)	-0.913727	-1.69817	-2.56409	-4.67362	-0.347418	0.191471	0.408434	0.147285	AT2G36690	oxidoreductase, 2OG-Fe(II) oxygenase family protein	0.827875	1.2002	1.55942	2.37593	1.94651	1.71907	1.78678	2.71185
AT4G26320	AGP13 (ARABINOGALACTAN PROTEIN 13)	-0.305057	-0.624096	-0.855543	-1.13905	-0.1377	-0.00968592	0.0327017	-1.03553	AT2G36970	UDP-glucoronosyl/UDP-glucosyl transferase family protein	-0.93649	-1.30763	-1.22934	-0.0857947	-1.10179	-1.30675	-0.825049	-0.405837
AT4G27260	GH3/WES1; indole-3-acetic acid amido synthetase	-0.306034	-0.376906	-0.438599	0.23546	0.58887	0.107902	0.10588	0.262731	AT2G37000	TCP family transcription factor, putative	0.340155	0.492787	0.724715	1.30999	0.32134	0.349155	0.557766	1.86816
AT4G27290	S-locus protein kinase, putative	-0.238937	-0.992207	-1.33428	-2.2458	-0.494212	-0.0928623	-0.7041	-0.508854	AT2G37040	PAL1 (PHE AMMONIA LYASE 1); phenylalanine ammonia-lyase	-0.938125	-0.770866	-0.501547	-0.463527	-0.548968	-0.926879	-0.627137	-1.44672
AT4G27450	hypothetical protein	-0.184963	-0.254318	-0.489687	-1.21555	-0.0630029	-0.314355	-0.41921	-1.17458	AT2G37210	hypothetical protein	0.874013	1.34621	1.56178	0.801567	-0.609967	0.532058	0.82432	0.487513
AT4G27550	ATTPS4 (Arabidopsis thaliana trehalose phosphatase/synthase 4); transferase, transferring glycosyl groups	1.02689	1.37137	1.4491	1.32923	0.594885	0.363509	0.376233	0.330101	AT2G37240	antioxidant/ oxidoreductase	0.497683	0.526861	0.89188	1.08477	0.918665	0.780165	0.924644	1.07232
AT4G28110	AtMYB41 (myb domain protein 41); DNA binding / transcription factor	-0.652914	-1.10622	-0.786865	-1.32488	-0.2787	0.129523	-0.918907	-1.34146	AT2G37260	TTG2 (TRANSPARENT TESTA GLABRA 2); transcription factor	0.360358	0.561184	1.0551	0.971341	0.160024	0.234886	0.395704	0.222487
AT4G28160	hydroxyproline-rich glycoprotein family protein	0.904686	0.857714	1.14802	0.424747	0.108088	0.127023	-0.408847	-0.409405	AT2G37280	ATPDR5/PDR5 (PLEIOTROPIC DRUG RESISTANCE 5); ATPase, coupled to transmembrane movement of substances	-0.417687	-0.288939	-0.726576	-1.03507	-0.411215	-0.927253	-0.605169	-0.97185
AT4G28405	Expressed protein	1.19102	1.16907	1.17392	1.02468	0.999796	0.902704	0.792628	0.920491	AT2G37370	hypothetical protein	-0.478176	-0.868969	-1.37624	-2.26183	-1.00256	-0.465483	-1.26103	-1.02146
AT4G28420	aminotransferase, putative	-1.81646	-1.86344	-1.44674	-0.862298	-1.35238	0.225639	0.563657	1.46384	AT2G37700	catalytic	-0.590398	-0.67966	-1.58619	-2.3507	-1.00617	-0.470182	-0.820381	-1.19509
AT4G28650	leucine-rich repeat transmembrane protein kinase, putative	-0.458369	-0.524635	-1.41101	-1.98706	-0.816144	-0.283243	-0.474117	-0.854229	AT2G37760	aldo/keto reductase family protein	0.358407	0.647787	1.49092	1.8642	0.921072	0.437298	0.437527	1.04671
AT4G28840	hypothetical protein	-1.36489	-2.47992	-1.84996	-1.12708	-1.46592	0.280312	-0.5596	-0.546651	AT2G37870	protease inhibitor/seed storage/lipid transfer protein (LTP) family protein	2.40888	3.32212	4.58671	5.42811	6.04379	5.65785	6.14289	6.06874
AT4G28940	catalytic	0.0172311	-0.760621	-0.86308	-0.711704	0.336474	0.565082	-0.194422	0.112371	AT2G38170	CAX1 (CATION EXCHANGER 1); calcium ion transmembrane transporter/ calcium:hydrogen antiporter	0.386922	0.49955	0.826793	1.27382	0.540251	0.666496	0.687603	0.534817
AT4G29030	glycine-rich protein	0.580848	0.85229	0.962169	0.938422	0.21228	0.601569	0.825191	0.592157	AT2G38195	protein binding / zinc ion binding	2.16468	1.39445	1.29824	2.76847	2.30803	3.18183	2.63421	3.91797
AT4G29110	hypothetical protein	-0.126018	-0.651195	-0.883947	-1.25481	-0.0528524	-0.0234096	-0.281189	0.160538	AT2G38240	oxidoreductase, 2OG-Fe(II) oxygenase family protein	1.57482	1.7083	4.22126	3.93076	2.27919	2.29923	1.31461	2.51657
AT4G29305	LCR25 (Low-molecular-weight cysteine-rich 25)	2.44766	2.28321	3.48717	3.23152	0.562347	1.95653	2.08557	2.83414	AT2G38250	DNA-binding protein-related	0.354988	1.10848	1.89251	2.06163	0.4764	0.557875	0.619346	0.70777
AT4G29710	phosphodiesterase/nucleotide pyrophosphatase-related	1.51468	1.42106	1.63496	2.5786	2.24087	1.77777	1.23261	2.14751	AT2G38310	hypothetical protein	-0.777782	-0.549343	-0.687537	-0.306954	-0.408447	-1.12317	-0.826135	-0.647093
AT4G30140	GDSL-motif lipase/hydrolase family protein	1.23762	0.797117	0.306191	0.254762	0.111972	0.967257	1.11611	0.91909	AT2G38320	hypothetical protein	-0.600321	-0.958096	-1.5667	-1.83199	-0.745297	-0.921406	-1.42706	-1.4769
AT4G30180	transcription factor/ transcription regulator	1.03626	1.21096	1.78729	1.34083	0.156806	0.136599	0.426806	-0.36089	AT2G38530	LTP2 (LIPID TRANSFER PROTEIN 2); lipid binding	1.0507	1.44366	2.72336	3.09236	1.7291	2.48516	2.94644	3.10548
AT4G30320	allergen V5/Tpx-1-related family protein	0.0305486	-0.329494	-0.819798	-1.7679	-0.153816	-0.0234314	-0.63013	-0.733495	AT2G38540	LP1 (nonspecific lipid transfer protein 1)	0.694557	0.97708	1.42908	1.45496	0.762271	1.15712	1.14435	1.1814
AT4G30730	hypothetical protein	-1.58761	-1.20621	-1.89743	-1.12	-0.0844062	-0.276864	0.771995	-0.545863	AT2G38823	hypothetical protein	2.22745	2.63512	3.77784	4.92899	3.10303	2.34409	2.25286	3.14915
AT4G31330	hypothetical protein	0.341918	0.795037	1.15971	1.30499	-0.0595631	0.442581	-0.00612392	0.169652	AT2G38940	ATPT2 (PHOSPHATE TRANSPORTER 2); carbohydrate transmembrane transporter/ phosphate transmembrane transporter/ sugar:hydrogen ion symporter	0.491946	0.421495	0.679669	1.47745	0.682045	0.70885	0.814803	1.01353
AT4G32270	hypothetical protein	-0.106628	-0.44556	-0.733098	-1.00737	-0.0279554	0.113025	-0.0595523	-0.0182843	AT2G39030	GCN5-related N-acetyltransferase (GNAT) family protein	3.55932	5.21528	10.4626	9.48226	4.18291	4.93036	5.86835	6.996
AT4G32780	hypothetical protein	-0.371578	-0.543843	-0.679185	-1.19025	-0.513625	-0.826055	-0.491268	-1.13852	AT2G39050	hydroxyproline-rich glycoprotein family protein	0.70453	0.671502	1.2287	1.52318	1.09457	1.21352	0.919287	1.46559
AT4G32810	CCD8 (CAROTENOID CLEAVAGE DIOXYGENASE 8)	-0.475596	-0.552529	-1.2337	-1.6262	-0.237777	-1.05925	-1.38494	-1.33374	AT2G39380	ATEXO70H2 (EXOCYST SUBUNIT EXO70 FAMILY PROTEIN H2); protein binding	0.562299	0.986547	1.6284	1.91355	0.814672	0.896512	1.11022	1.7335
AT4G33280	DNA binding / transcription factor	-0.80478	-0.913763	-1.8223	-2.09872	0.00839824	0.00542007	0.126335	0.274943	AT2G39510	nodulin MtN21 family protein	1.58133	0.135222	1.04316	1.5104	0.33444	2.26494	2.15784	2.08283
AT4G33465	SCRL22 (SCR-Like 22)	2.38506	1.84641	2.47858	1.81321	1.58603	1.63745	2.00751	1.85901	AT2G39730	RCA (RUBISCO ACTIVASE)	-0.604547	-0.291454	-0.174091	-0.312284	-0.523277	-1.14308	-0.59909	-2.02654
AT4G33560	hypothetical protein	-0.255064	-0.315696	-0.564153	-1.28312	0.141819	0.011975	0.387921	-0.260403	AT2G39800	P5CS1 (DELTA1-PYRROLINE-5-CARBOXYLATE SYNTHASE 1)	2.70742	2.43077	1.63961	2.73064	2.23661	3.25553	2.40497	3.45547
AT4G33720	pathogenesis-related protein, putative	-0.812685	-0.368607	-1.10656	-2.24648	0.395829	-0.257736	-1.04075	-0.857058	AT2G39950	hypothetical protein	-0.702592	-0.675769	-0.986033	-1.29394	-1.19591	-1.10408	-0.852626	-1.31767
AT4G33730	pathogenesis-related protein, putative	-0.528498	-1.12087	-1.43999	-2.01819	-0.325341	0.0138245	-0.730634	-0.810929	AT2G40000	hypothetical protein	-0.505453	-0.310789	-0.189926	-0.477713	-1.04192	-1.12381	-1.87892	-1.96472
AT4G34760	auxin-responsive family protein	0.793331	0.969385	1.36533	1.12528	0.388772	0.647417	0.611454	0.0194486	AT2G40170	ATEM6/GEA6 (ARABIDOPSIS EARLY METHIONINE-LABELLED 6)	0.564685	0.948865	1.43661	3.46035	1.03647	1.42528	3.60567	3.23865
AT4G35350	XCP1 (XYLEM CYSTEINE PEPTIDASE 1); cysteine-type peptidase	-0.298669	-0.241398	-0.701949	-1.21464	0.0382893	-0.0237377	0.10611	-0.392101	AT2G40330	Bet v I allergen family protein	-2.16141	-1.96617	-2.45229	-2.37258	-2.08793	-3.55276	-3.59116	-3.33414
AT4G35655	hypothetical protein	2.46246	1.72257	3.51276	4.49518	-0.0656809	1.18645	0.313832	0.52617	AT2G40340	AP2 domain-containing transcription factor, putative (DRE2B)	-1.01128	-0.982038	-0.983615	-0.937238	-0.74304	-1.31677	-1.13991	-1.07326
AT4G35750	Rho-GTPase-activating protein-related	-0.207361	-0.466594	-0.638527	-0.79378	0.084856	0.0963755	-0.0779399	-0.33672	AT2G40350	DNA binding / transcription factor	-0.789279	-0.823386	-0.865219	-0.837047	-0.279838	-1.01808	-0.847907	-0.788542
AT4G35770	SEN1 (DARK INDUCIBLE 1)	-1.76337	-2.83394	-3.88874	-4.46436	0.20516	-0.315157	-0.900413	-1.10046	AT2G40390	hypothetical protein	-0.909741	-0.733718	-1.22217	-1.77071	-0.457877	-1.14607	-1.5429	-1.8261
AT4G36010	pathogenesis-related thaumatin family protein	0.170282	0.637376	1.09194	1.4317	0.369609	0.0621618	0.15778	0.306525	AT2G40470	LBD15 (LOB DOMAIN-CONTAINING PROTEIN 15)	-0.387671	-0.281685	-0.85745	-1.15961	-0.297203	-0.291227	-0.0830453	-0.136917
AT4G36050	endonuclease/exonuclease/phosphatase family protein	-0.164904	-0.56888	-0.631125	-0.879963	-0.0655622	0.244488	0.270774	0.298879	AT2G40475	hypothetical protein	0.54191	0.432724	0.676903	1.01284	0.134446	0.205134	0.536721	0.146892
AT4G36110	auxin-responsive protein, putative	-0.310406	0.20716	1.11085	1.44187	-0.504672	-0.191127	-0.0198791	-0.50477	AT2G40520	nucleotidyltransferase family protein	0.766681	0.855744	1.18837	1.24797	0.265228	0.654702	0.619431	0.830397
AT4G36410	UBC17 (UBIQUITIN-CONJUGATING ENZYME 17); ubiquitin-protein ligase	-0.799093	-0.954113	-0.993482	-0.655782	0.48918	-0.0732667	0.0507703	-0.200654	AT2G40670	ARR16 (response regulator 16); transcription regulator/ two-component response regulator	1.40517	1.65612	2.38847	2.88124	0.268264	1.20858	1.20349	1.49713
AT4G36850	PQ-loop repeat family protein / transmembrane family protein	-0.15655	-0.564378	-0.691189	-1.08859	1.3607	1.75264	1.37843	1.34158	AT2G40740	WRKY55 (WRKY DNA-binding protein 55); transcription factor	-1.63003	-1.4348	-1.3117	-1.79741	-0.842708	-0.482971	-0.133329	-0.380914
AT4G37060	PLA IVB/PLP5 (Patatin-like protein 5); nutrient reservoir	-0.510638	-1.2852	-1.5681	-1.6323	-1.65107	0.0466951	-0.481463	-0.371261	AT2G40910	F-box protein-related	1.70042	1.96618	2.59521	2.20562	1.54562	2.14503	2.0687	2.52848
AT4G37140	MEE69 (maternal effect embryo arrest 69); hydrolase, acting on ester bonds	1.1961	1.57343	2.61494	2.38203	1.05136	0.618047	0.597502	0.543052	AT2G41010	ATCAMBP25 (ARABIDOPSIS THALIANA CALMODULIN (CAM)-BINDING PROTEIN OF 25 KDA); calmodulin binding	0.163001	0.65806	0.965609	1.06628	0.230299	0.0642396	0.164414	0.18315
AT4G37160	SKS15 (SKU5 Similar 15); copper ion binding	-0.170708	-0.201184	-1.21319	-1.00026	-0.00126164	-0.0247083	0.186598	0.0194237	AT2G41150	hypothetical protein	-0.561005	-0.604765	-1.21416	-1.4636	-0.512986	-0.458978	-0.48283	-0.891774
AT4G37370	CYP81D8 (cytochrome P450, family 81, subfamily D, polypeptide 8); oxygen binding	0.675808	0.885984	1.45997	1.3328	-0.0490308	0.045835	-0.0967314	0.271487	AT2G41190	amino acid transporter family protein	1.37437	1.05043	1.36733	1.93322	2.75714	3.14649	3.34336	3.83778
AT4G37400	CYP81F3 (cytochrome P450, family 81, subfamily F, polypeptide 3); oxygen binding	-0.687898	-0.745123	-1.37188	-1.237	-0.33826	0.0594891	-0.0859138	-0.10387	AT2G41230	hypothetical protein	-0.759167	-0.46368	-0.890133	-0.918434	-0.240347	-0.830357	-0.855627	-1.11607
AT4G37410	CYP81F4 (cytochrome P450, family 81, subfamily F, polypeptide 4); oxygen binding	-0.421094	-0.796932	-0.100734	0.17064	0.262167	0.409984	0.350893	0.403443	AT2G41475	hypothetical protein	0.219697	0.328678	0.883837	0.958507	0.380676	0.453529	0.429335	0.349122
AT4G37700	hypothetical protein	-0.205741	-2.14444	-0.960283	-2.48087	0.270959	0.213345	-0.920199	-0.901232	AT2G41480	peroxidase	-0.815884	-0.93414	-1.10872	-1.35898	-0.353705	-1.19158	-1.26451	-1.47801
AT4G38470	protein kinase family protein	-0.453288	-0.492157	-0.808302	-1.42523	-0.548439	-0.236643	-0.575587	-0.796881	AT2G41510	ATCKX1/CKX1 (CYTOKININ OXIDASE/DEHYDROGENASE 1); cytokinin dehydrogenase	-0.585219	-0.519397	-1.1299	-2.06523	-1.14375	-1.71932	-1.55799	-1.98797
AT4G38500	hypothetical protein	0.0642057	0.0444465	-0.0534347	-0.199703	-0.145636	-0.0395002	-0.0689598	-0.0228117	AT2G41810	hypothetical protein	-0.190077	-0.175871	-1.29189	-1.65778	-0.672827	-1.41867	-2.21396	-4.14596
AT4G38560	hypothetical protein	0.336875	0.819633	1.22369	1.44118	-0.0650313	1.36324	0.922746	1.53591	AT2G41870	remorin family protein	0.757512	0.151004	0.579615	0.666167	0.990382	1.34166	1.10132	1.74581
AT4G38840	auxin-responsive protein, putative	0.74401	0.866226	1.39944	1.51986	-0.0188025	0.53019	0.661148	0.700116	AT2G41905	hypothetical protein	0.327068	0.941788	1.60092	2.22822	1.20893	0.495422	0.783083	0.822784
AT4G38850	SAUR_AC1 (SMALL AUXIN UP RNA 1 FROM ARABIDOPSIS THALIANA ECOTYPE COLUMBIA)	1.57701	1.18034	1.40895	1.26281	-0.713103	0.36005	-0.480992	-0.611861	AT2G41940	ZFP8 (ZINC FINGER PROTEIN 8); nucleic acid binding / transcription factor/ zinc ion binding	0.282085	0.340541	0.436095	0.443326	0.646166	0.761192	0.962162	1.1404
AT4G38860	auxin-responsive protein, putative	0.815606	0.761896	1.51472	2.51975	-0.531013	-0.153663	0.167299	-1.28109	AT2G41990	hypothetical protein	0.201319	-0.677136	-0.938708	-0.12275	-0.534871	-0.684708	-0.5713	-1.13568
AT4G39500	CYP96A11 (cytochrome P450, family 96, subfamily A, polypeptide 11); oxygen binding	1.94103	2.38827	1.91188	2.43276	1.3782	1.98081	1.32278	1.23262	AT2G42250	CYP712A1 (cytochrome P450, family 712, subfamily A, polypeptide 1); oxygen binding	2.1181	2.26096	2.03811	1.96132	1.54109	1.00817	1.65215	2.67783
AT4G39590	kelch repeat-containing F-box family protein	-0.513711	-0.649061	-1.1391	-0.519417	-0.372406	0.76418	0.961095	1.17951	AT2G42440	LOB domain protein 17 / lateral organ boundaries domain protein 17 (LBD17)	-0.443151	-0.452852	-0.825398	-0.695588	-0.68106	-1.165	-1.17288	-1.40933
AT4G39710	immunophilin, putative / FKBP-type peptidyl-prolyl cis-trans isomerase, putative	-0.0682747	-0.365785	-0.763998	-1.0342	0.12724	0.0191882	-0.207084	-0.253749	AT2G42530	COR15B	1.54595	1.49397	1.4768	1.25397	1.95402	2.04192	1.87534	1.98364
AT5G01215	miscRNA	-0.34081	-0.460382	-0.633878	-1.13954	-0.183801	-0.00178836	-0.32917	-0.139395	AT2G42540	COR15A (COLD-REGULATED 15A)	3.1286	3.53035	3.91988	4.35796	4.91904	4.98816	4.87237	5.1392
AT5G01380	transcription factor	0.74177	0.951578	1.69674	1.76517	0.0976675	0.594365	0.248688	0.893044	AT2G42660	myb family transcription factor	-0.545498	-0.582816	-1.10197	-1.2296	-0.20701	-0.49943	-0.705693	-0.623679
AT5G01640	prenylated rab acceptor (PRA1) family protein	-0.0915006	0.114012	0.0950818	-0.467722	-0.681006	-0.391793	-0.517399	-0.764205	AT2G42860	hypothetical protein	2.17525	2.27198	3.09947	3.58893	1.86741	1.99175	2.04191	1.36424
AT5G01760	VHS domain-containing protein / GAT domain-containing protein	1.13953	0.877546	0.881327	1.01251	0.818916	0.774719	1.15434	1.34973	AT2G43100	aconitase C-terminal domain-containing protein	0.27946	0.548599	0.788074	1.05053	0.540375	0.361037	0.615155	1.16236
AT5G01930	(1-4)-beta-mannan endohydrolase, putative	-0.236826	-0.453175	-1.03694	-1.74882	-0.280157	-0.106373	-0.545088	-0.484176	AT2G43140	DNA binding / transcription factor	-1.88561	-1.13686	-1.63067	-1.49623	-2.23514	-3.15884	-2.58044	-4.23969
AT5G02070	protein kinase-related	-0.50174	-0.788179	-1.25449	-1.41188	-0.704807	-0.195674	-0.181581	-0.374533	AT2G43220	DC1 domain-containing protein	-0.876415	-0.81178	-1.04893	-1.07199	-1.49914	-2.23685	-2.37657	-2.13576
AT5G03270	hypothetical protein	-0.0248533	-0.208852	-0.403886	-0.980622	0.343973	0.205805	0.0187845	0.27176	AT2G43290	MSS3 (MULTICOPY SUPPRESSORS OF SNF4 DEFICIENCY IN YEAST 3); calcium ion binding	0.339573	1.09753	1.30538	1.30306	0.955998	0.485863	0.568741	0.543702
AT5G03310	auxin-responsive family protein	-0.375939	-0.762474	-0.866755	-1.91437	-0.47329	-0.040634	-0.402634	-0.650291	AT2G43510	ATTI1 (ARABIDOPSIS THALIANA TRYPSIN INHIBITOR PROTEIN 1)	0.599336	0.846717	2.21563	2.62155	0.434323	1.27277	1.55411	1.88065
AT5G03360	DC1 domain-containing protein	0.621318	0.334956	0.537691	0.763138	0.808774	0.532759	0.0197867	0.922772	AT2G43530	trypsin inhibitor, putative	0.468516	0.53161	1.30519	1.24316	0.790848	0.615166	0.59385	0.429856
AT5G03435	C2 domain-containing protein	-0.443727	-0.491614	-1.97617	-2.37648	0.0226041	-0.248753	-0.496876	-1.12744	AT2G43540	hypothetical protein	0.252361	0.321921	0.613009	1.22445	0.965754	0.404376	0.640421	1.01878
AT5G03500	transcription coactivator	-0.293234	0.141211	0.382948	-0.152813	-0.303608	-0.103877	-0.267839	-0.556297	AT2G43580	chitinase, putative	1.50944	0.675935	0.678855	1.7267	0.81754	1.55367	1.24152	3.25969
AT5G03545	hypothetical protein	0.00777388	-0.702391	-1.39613	-2.58087	0.258723	0.266109	-0.0698031	-0.195773	AT2G43610	glycoside hydrolase family 19 protein	-0.773113	-0.482913	-1.05637	-1.07199	-0.488136	-0.609593	-0.323901	-0.786775
AT5G03552	misc_RNA	-0.181806	-0.555953	-1.06583	-1.57608	0.0331807	0.169696	0.214206	-0.0752924	AT2G43620	chitinase, putative	0.176718	0.465654	2.04732	2.5128	2.11572	3.22468	3.54572	3.9351
AT5G04150	BHLH101; DNA binding / transcription factor	1.48924	1.55824	1.10016	1.41871	0.797729	-0.883854	-1.74896	-1.37199	AT2G43910	thiol methyltransferase, putative	-0.529925	-0.863738	-1.00045	-1.36531	-0.600328	-0.589809	-0.800521	-0.860224
AT5G04190	PKS4 (PHYTOCHROME KINASE SUBSTRATE 4)	0.637346	0.803149	1.66009	1.74773	0.25306	0.503697	0.468354	0.671464	AT2G43920	thiol methyltransferase, putative	-0.622707	-0.738756	-1.04382	-1.45997	-0.195675	-0.687346	-0.790451	-0.828442
AT5G04630	CYP77A9 (cytochrome P450, family 77, subfamily A, polypeptide 9); oxygen binding	1.84157	1.95007	2.09852	1.95356	1.14154	1.21232	1.30705	1.40711	AT2G44290	protease inhibitor/seed storage/lipid transfer protein (LTP) family protein (YLS3)	0.180142	0.551714	0.872125	0.696203	0.894055	0.989249	1.15312	0.985873
AT5G04820	ATOFP13/OFP13 (Arabidopsis thaliana ovate family protein 13)	0.0887109	-0.0426561	-0.0286712	-0.173765	-0.367622	0.0444799	-0.120358	-0.0316188	AT2G44300	lipid transfer protein-related	0.481409	0.37292	0.260022	0.168328	0.936692	0.926705	0.971073	1.17134
AT5G05250	hypothetical protein	1.14734	1.53484	1.18743	1.32769	0.702689	-0.61058	-1.17092	-0.707126	AT2G44840	ATERF13/EREBP (ETHYLENE-RESPONSIVE ELEMENT BINDING FACTOR 13); DNA binding / transcription factor	0.768239	0.367277	2.05281	1.67724	0.354073	1.37271	1.09343	1.54374
AT5G05430	hypothetical protein	-1.13029	-1.74142	-2.29475	-1.84272	-0.313342	-0.757053	-0.564936	-0.455353	AT2G44910	homeobox-leucine zipper protein 4 (HB-4) / HD-ZIP protein 4	0.638325	0.632516	0.60407	0.392999	0.0874045	1.14584	1.59863	1.69215
AT5G05500	pollen Ole e 1 allergen and extensin family protein	-0.122067	-0.440504	-1.04817	-1.44575	-0.331664	-0.0344634	-0.697261	-0.60621	AT2G45050	zinc finger (GATA type) family protein	-0.692995	-0.428775	-0.937386	-0.983122	-0.544932	-0.637188	-0.176071	-1.52222
AT5G05880	UDP-glucoronosyl/UDP-glucosyl transferase family protein	-0.465666	-0.355633	-0.999786	-0.854356	-0.136408	-0.146727	-0.340644	0.0319808	AT2G45160	scarecrow transcription factor family protein	-0.480699	-0.47252	-0.752461	-1.26444	-1.01401	-0.665675	-0.85555	-1.15385
AT5G06250	hypothetical protein	-0.549384	-0.364797	-0.453466	-0.754533	-0.977452	-1.13358	-1.29176	-1.49855	AT2G45220	pectinesterase family protein	-0.285216	-0.860081	-0.851575	-1.05822	-1.04548	-0.651184	-1.39415	-1.33909
AT5G06320	NHL3 (NDR1/HIN1-like 3)	0.172527	0.81901	1.3584	1.33496	0.231229	-0.0289923	-0.157132	-0.0587325	AT2G45360	hypothetical protein	-0.341189	-0.357754	-0.584124	-0.798879	-1.02885	-1.5741	-1.85469	-1.6501
AT5G07260	homeobox protein-related	0.938267	1.27268	2.68843	2.42646	0.288603	0.723514	0.378473	0.871929	AT2G45420	LBD18 (LOB DOMAIN-CONTAINING PROTEIN 18)	1.06733	-0.236477	0.6588	-0.224214	0.562761	-0.102849	0.034388	-0.221804
AT5G07610	F-box family protein	3.65134	1.74205	3.0972	2.42425	3.05677	3.42614	3.43143	1.99928	AT2G45470	FLA8 (Arabinogalactan protein 8)	-0.0625329	-0.256219	-0.506937	-0.930535	-0.83322	-0.786454	-0.991719	-1.21336
AT5G08360	hypothetical protein	0.641416	0.766288	0.817216	1.03594	-0.0931559	0.120453	0.433588	0.594109	AT2G45550	CYP76C4 (cytochrome P450, family 76, subfamily C, polypeptide 4); oxygen binding	-0.549364	-2.98338	-3.73689	-1.89886	-1.69331	-0.964124	-2.48052	-2.05706
AT5G08760	hypothetical protein	1.00761	1.98247	2.21671	1.98324	0.192128	0.185845	-0.215786	-0.0225954	AT2G45570	CYP76C2 (cytochrome P450, family 76, subfamily C, polypeptide 2); oxygen binding	2.38299	1.30047	3.04882	4.53573	1.94563	1.6171	1.33787	1.79424
AT5G09270	hypothetical protein	0.279813	0.346553	0.645327	1.05049	0.387321	0.209289	0.287701	0.502037	AT2G45600	hydrolase	1.02786	0.827099	0.887855	0.401103	0.659364	1.13333	0.907898	1.09939
AT5G09440	phosphate-responsive protein, putative	-0.518731	-0.903029	-1.16056	-1.33262	0.378043	-0.138313	-0.508799	-0.495369	AT2G45760	BAP2 (BON ASSOCIATION PROTEIN 2)	1.1449	1.54578	1.84925	1.48768	1.71373	2.23027	2.06634	2.07687
AT5G09970	CYP78A7 (cytochrome P450, family 78, subfamily A, polypeptide 7); oxygen binding	0.425126	0.650319	1.45116	1.78684	0.0725632	0.736487	1.51901	1.03019	AT2G46130	WRKY43 (WRKY DNA-binding protein 43); transcription factor	0.786421	0.631033	1.01826	0.814095	0.365415	0.599443	0.494989	0.357027
AT5G10230	ANN7/ANNAT7 (ANNEXIN ARABIDOPSIS 7); calcium ion binding / calcium-dependent phospholipid binding	-0.348154	-1.19606	-0.902744	-0.863251	0.413518	0.900698	-0.0636342	0.198555	AT2G46270	GBF3 (G-BOX BINDING FACTOR 3); transcription factor	0.411804	0.424067	0.764637	1.06472	0.492539	1.10364	0.99076	1.532
AT5G10278	miscRNA	-0.715664	-0.372213	-0.999727	-1.09578	-0.856403	-0.240023	-0.59724	-0.679687	AT2G46310	CRF5 (CYTOKININ RESPONSE FACTOR 5); DNA binding / transcription factor	0.163941	0.513575	0.650158	0.978962	0.293508	0.350696	1.00443	0.886034
AT5G10420	antiporter	0.415297	0.940221	1.33038	0.711677	1.28007	0.292382	0.353929	0.937684	AT2G46375	hypothetical protein	0.881952	0.893278	0.547186	0.66725	1.38233	1.3928	1.66983	1.54278
AT5G10695	hypothetical protein	0.311015	1.21128	1.69395	1.64144	0.469314	0.225256	-0.0392558	0.0751776	AT2G46510	basic helix-loop-helix (bHLH) family protein	0.546821	0.762788	1.02012	0.779717	0.256243	0.588091	0.411592	0.656285
AT5G10760	aspartyl protease family protein	1.03907	1.45893	1.46371	1.13279	-0.134072	2.1185	1.23737	1.75859	AT2G46640	hypothetical protein	1.11766	1.22905	1.52191	1.14975	1.11317	1.36804	1.08363	1.67188
AT5G11360	ATP binding / protein kinase	0.530002	1.12647	1.80536	2.17376	0.904172	0.644434	0.660087	0.751657	AT2G46680	ATHB-7 (ARABIDOPSIS THALIANA HOMEOBOX 7); transcription factor	1.00073	0.926487	1.41917	1.6553	1.34197	1.80761	1.60615	2.06575
AT5G11410	protein kinase family protein	0.781426	1.236	2.55629	2.71195	0.264487	0.393058	0.231031	0.0108329	AT2G46740	FAD-binding domain-containing protein	-0.600779	-0.781642	-1.15264	-1.20888	-1.31466	-1.26983	-1.699	-1.53934
AT5G12270	oxidoreductase, 2OG-Fe(II) oxygenase family protein	-1.6127	-0.0649336	-0.788248	0.0807085	-0.449495	-0.269652	-1.63214	-0.531142	AT2G46750	FAD-binding domain-containing protein	-1.16625	-0.918838	-0.901492	-0.591088	-0.923124	-1.93963	-1.92803	-1.24819
AT5G13320	PBS3 (AVRPPHB SUSCEPTIBLE 3)	0.408109	0.86951	1.38228	1.81547	0.552322	0.814344	0.533193	0.475282	AT2G46780	RNA recognition motif (RRM)-containing protein	-0.566875	0.0706916	-0.129216	-0.607332	-0.506075	-1.06048	-0.164677	-2.04215
AT5G13330	RAP2L (related to AP2 6L); DNA binding / transcription factor	0.122024	0.518273	1.11305	1.62885	-0.137717	0.310939	0.340998	0.768659	AT2G46860	ATPPA3 (ARABIDOPSIS THALIANA PYROPHOSPHORYLASE 3); inorganic diphosphatase/ pyrophosphatase	-0.168297	-0.605407	-1.00704	-1.36916	-0.491477	-0.448026	-1.11237	-1.09565
AT5G13870	EXGT-A4 (ENDOXYLOGLUCAN TRANSFERASE A4); hydrolase, acting on glycosyl bonds	-0.395891	-0.376629	-1.13827	-1.24335	-0.10638	0.113885	0.46312	0.0117908	AT2G46990	IAA20 (indoleacetic acid-induced protein 20); transcription factor	-0.334135	-0.413112	-1.03815	-1.81862	-0.605269	-0.41509	-0.500142	-0.874933
AT5G13990	ATEXO70C2 (exocyst subunit EXO70 family protein C2); protein binding	-0.0973994	-0.407734	-1.08828	-1.58194	-0.398696	0.121454	-0.23603	-0.353898	AT2G47050	invertase/pectin methylesterase inhibitor family protein	0.981353	1.82161	3.02679	3.03239	2.54802	3.17584	1.98898	3.08231
AT5G14020	hypothetical protein	-0.254493	-0.59381	-1.45781	-1.91551	-0.442622	0.161159	0.224477	-0.142452	AT2G47270	transcription factor/ transcription regulator	-0.246334	-0.70876	-1.30101	-1.43641	-0.148845	-0.372333	-0.732585	-1.22692
AT5G14070	ROXY2; thiol-disulfide exchange intermediate	-0.689827	-1.7675	-2.03804	-2.81767	-0.807563	-0.0308672	-0.668391	-0.505646	AT2G47460	ATMYB12/MYB12 (MYB DOMAIN PROTEIN 12); DNA binding / transcription activator/ transcription factor	-0.865518	-0.991606	-0.961357	-1.07257	-0.709974	-0.634068	-0.797931	-0.662011
AT5G14150	hypothetical protein	-0.169682	-0.230802	-1.14256	-1.18588	-0.0895863	0.0270565	0.0101805	-0.211741	AT2G47540	pollen Ole e 1 allergen and extensin family protein	-0.6543	-0.531	-0.452295	-0.318979	-0.686763	-0.894749	-0.548628	-1.99004
AT5G14380	AGP6 (ARABINOGALACTAN PROTEINS 6)	0.359587	0.432751	1.29086	1.10128	0.0965355	0.162152	0.205778	0.0859482	AT2G47550	pectinesterase family protein	-0.719979	-0.997481	-1.75694	-2.34562	-0.904718	-0.698798	-1.37452	-1.07853
AT5G15160	bHLH family protein	0.950165	0.815805	1.25374	0.862277	-0.139759	0.385694	0.266095	0.447449	AT2G47560	zinc finger (C3HC4-type RING finger) family protein	-1.4251	-1.57831	-2.47392	-3.73062	-0.225541	-1.17364	-0.931136	-1.14009
AT5G15290	integral membrane family protein	-0.952496	-1.22551	-1.91648	-3.48993	0.388483	-0.22344	-1.09259	-1.3457	AT2G47770	benzodiazepine receptor-related	2.90876	2.26188	3.76914	5.09292	5.30998	5.79181	5.87727	6.98531
AT5G15581	hypothetical protein	1.02695	0.801934	0.830075	0.290169	-0.0940657	0.556696	0.333691	0.135858	AT2G47780	rubber elongation factor (REF) protein-related	1.76422	2.15017	3.18769	3.51994	3.32608	3.27258	3.46798	3.92834
AT5G15800	SEP1 (SEPALLATA1)	-0.460035	-0.902794	-0.830218	-1.15691	-0.291847	-1.62977	-1.88544	-2.04949	AT2G48090	hypothetical protein	-1.25309	-1.0135	-1.00395	-1.21288	-1.13773	-1.74451	-1.98748	-2.03153
AT5G15840	CO (CONSTANS); transcription factor/ zinc ion binding	-0.223147	-0.485405	-0.866443	-1.18419	-0.106928	-0.221637	-0.0136732	-0.0292382	AT3G01070	plastocyanin-like domain-containing protein	-0.531006	-0.708491	-1.26037	-1.89613	-0.525569	-0.555929	-0.414484	-0.819572
AT5G15845	misc_RNA	-0.662761	-0.761459	-0.885229	-1.5296	-0.482996	-0.645298	-0.180069	-1.04041	AT3G01190	peroxidase 27 (PER27) (P27) (PRXR7)	-0.159405	-0.45611	-0.909104	-1.04455	-0.33569	-0.399195	-0.731694	-0.870046
AT5G15950	adenosylmethionine decarboxylase family protein	0.37282	1.03077	0.511716	0.289615	-0.312677	-0.532998	-0.353641	-0.173305	AT3G01329	hypothetical protein	0.750476	0.803064	1.19418	1.3487	0.641791	0.503254	0.414155	0.531152
AT5G16720	hypothetical protein	-0.274214	-0.285323	-0.547561	-1.02966	-0.437424	-0.68231	-0.354037	-0.704794	AT3G01500	CA1 (CARBONIC ANHYDRASE 1); carbonate dehydratase/ zinc ion binding	-0.0818227	-0.0705541	-0.151145	-0.318654	-0.131774	-0.0219601	-0.232514	-0.311061
AT5G17030	UDP-glucoronosyl/UDP-glucosyl transferase family protein	-2.34938	-1.28945	-2.44388	-2.17389	-0.420529	-0.959681	-0.757798	-0.760113	AT3G01730	hypothetical protein	-0.303735	-0.598311	-1.06276	-1.02392	-0.616322	-0.645595	-1.36102	-1.6588
AT5G17350	hypothetical protein	0.13971	0.284812	0.940307	1.16614	0.185165	0.314567	0.104371	-0.24763	AT3G01950	hypothetical protein	-0.708945	-0.691726	-1.01648	-1.46241	-0.677672	-0.627347	-0.700235	-0.909112
AT5G17970	disease resistance protein (TIR-NBS-LRR class), putative	0.36261	1.77335	3.2071	3.27409	0.381383	0.474285	0.62043	-0.0273235	AT3G02040	SRG3 (SENESCENCE-RELATED GENE 3); glycerophosphodiester phosphodiesterase	-0.0740924	-0.407527	-0.798579	-1.04306	-0.27805	-0.143694	-0.388588	-0.312931
AT5G18010	auxin-responsive protein, putative	1.54496	1.48002	1.42303	1.06954	-0.322721	0.0973489	-0.67349	-0.810584	AT3G02140	TMAC2 (TWO OR MORE ABRES-CONTAINING GENE 2)	-1.52489	-1.34519	-1.69064	-1.81643	-0.609484	-1.27404	-1.19387	-1.44761
AT5G18020	auxin-responsive protein, putative	1.4509	1.36242	1.42569	1.66381	-0.342463	0.0870058	-0.49711	-0.579446	AT3G02430	hypothetical protein	-0.443487	-0.501945	-0.943673	-1.24875	-0.760654	-0.398179	-0.538991	-1.31393
AT5G18030	auxin-responsive protein, putative	1.53937	1.39826	1.40269	1.14251	-0.333877	0.114062	-0.436829	-0.652921	AT3G02480	ABA-responsive protein-related	1.87833	2.39795	2.94868	4.04102	5.15581	4.29977	4.20711	3.77848
AT5G18050	auxin-responsive protein, putative	1.42903	1.41267	1.47009	1.50289	0.0159164	0.390261	-0.145158	-0.212845	AT3G02500	hypothetical protein	1.00219	0.786143	1.35867	1.63638	0.691927	1.38191	1.10231	1.64274
AT5G18060	auxin-responsive protein, putative	1.43888	1.36582	1.33474	1.10054	-0.449221	0.0916364	-0.649058	-0.763581	AT3G02885	GASA5 (GAST1 PROTEIN HOMOLOG 5)	1.00974	0.968826	1.19157	1.59758	0.974196	0.666109	1.06029	1.14764
AT5G18080	auxin-responsive protein, putative	1.4258	1.30706	1.0879	0.83496	-0.424593	-0.00824554	-0.601946	-0.736298	AT3G03170	hypothetical protein	0.353817	0.531149	0.473954	0.704697	1.02627	0.916952	1.17343	0.973681
AT5G18710	hypothetical protein	-0.9483	-0.592368	-0.720989	-1.03677	-0.70355	-1.24635	-0.116357	-2.24666	AT3G03230	esterase/lipase/thioesterase family protein	1.37911	1.22489	2.02438	2.25141	1.67651	1.98332	1.60519	2.28067
AT5G19100	extracellular dermal glycoprotein-related / EDGP-related	0.317448	0.0595139	0.706014	-0.182117	-0.544165	-0.078823	-0.15365	0.0612596	AT3G03341	hypothetical protein	3.36207	4.69195	4.69677	4.77627	5.68723	5.62656	5.35663	5.13007
AT5G19240	hypothetical protein	0.0270558	0.256192	0.379788	0.319659	-0.378489	-0.334725	-0.540612	-0.252877	AT3G03480	CHAT (ACETYL COA:(Z)-3-HEXEN-1-OL ACETYLTRANSFERASE); acetyl CoA:(Z)-3-hexen-1-ol acetyltransferase	-2.20343	-2.3764	-2.16972	-2.89451	-0.461726	-2.42057	-2.55216	-2.29994
AT5G19390	pleckstrin homology (PH) domain-containing protein / RhoGAP domain-containing protein	-0.220067	-0.247682	-0.54497	-1.00819	-0.376041	-0.145073	-0.294995	-0.604611	AT3G03670	peroxidase, putative	-2.65642	-3.45	-3.78854	-3.46354	-3.19825	-4.69167	-4.58092	-5.25233
AT5G19530	ACL5 (ACAULIS 5)	-0.459166	-0.742639	-1.16922	-1.57605	0.223534	-0.252462	-0.348294	-0.311479	AT3G03820	auxin-responsive protein, putative	1.90488	2.02627	2.61234	2.56925	0.526474	1.47171	1.20359	0.950618
AT5G19560	ATROPGEF10/ROPGEF10 (KINASE PARTNER PROTEIN-LIKE); Rho guanyl-nucleotide exchange factor/	-0.078289	-0.549659	-1.03473	-1.30271	0.195167	0.540368	-0.229402	0.119326	AT3G03850	auxin-responsive protein, putative	1.64773	1.5256	1.88109	2.2426	0.340099	1.0343	0.767269	0.8428
AT5G20250	DIN10 (DARK INDUCIBLE 10); hydrolase, hydrolyzing O-glycosyl compounds	-1.07005	-1.02272	-1.44866	-1.90408	-0.163733	-0.559658	-1.0481	-0.711874	AT3G04181	hypothetical protein	0.361167	0.307663	0.627163	1.10802	0.992247	0.455953	0.508055	0.976615
AT5G20700	senescence-associated protein-related	0.396557	0.598344	1.16221	1.37382	0.0640425	0.241919	0.428044	-0.165498	AT3G04210	disease resistance protein (TIR-NBS class), putative	-0.460715	-0.477264	-0.559776	-0.770238	-0.575504	-0.839811	-1.06427	-1.05096
AT5G20790	hypothetical protein	-0.642163	-0.842272	-1.05707	-0.871799	0.0120928	-0.293933	-0.247729	-0.486663	AT3G05150	sugar transporter family protein	-0.44257	-0.612779	-1.27942	-1.75414	-0.514292	-0.356657	-0.777699	-0.983432
AT5G21130	hypothetical protein	-0.381726	-0.702764	-0.996337	-1.77265	-0.585794	-0.197317	-0.819601	-0.601271	AT3G05390	hypothetical protein	-0.57459	-0.334665	-1.0848	-1.08036	-0.525913	-0.776537	-0.728514	-1.0285
AT5G21950	hydrolase, alpha/beta fold family protein	-0.528804	-0.80868	-0.931767	-1.15212	0.065059	-0.0730644	-0.584649	-0.485035	AT3G05640	protein phosphatase 2C, putative / PP2C, putative	1.69289	1.91673	2.69633	2.87428	2.72117	2.51231	2.46634	2.48856
AT5G22545	hypothetical protein	1.01398	1.68507	2.44274	2.28229	0.619132	3.01719	1.82318	3.51106	AT3G05660	kinase/ protein binding	0.821862	0.974342	1.1471	1.44255	1.64768	1.17436	1.4221	1.52195
AT5G22550	hypothetical protein	0.471347	0.610342	1.03239	1.07292	0.0781678	0.65402	0.602986	0.969001	AT3G05690	ATHAP2B/HAP2B/UNE8 (HEME ACTIVATOR PROTEIN (YEAST) HOMOLOG 2B); transcription factor	-0.672464	-0.861212	-0.330089	-0.186362	-0.827161	-1.25657	-1.1916	-1.27872
AT5G22570	WRKY38 (WRKY DNA-binding protein 38); transcription factor	1.93203	2.97884	1.99349	1.13073	0.370531	3.7042	1.93969	3.27865	AT3G05730	hypothetical protein	-0.0725824	-0.600052	-0.808468	-1.26853	-1.15947	-0.57035	-0.687784	-0.816685
AT5G22620	phosphoglycerate/bisphosphoglycerate mutase family protein	-0.226953	-0.297095	-0.602667	-1.17906	-0.256536	-0.0956176	-0.173187	-0.297211	AT3G05858	hypothetical protein	-0.725357	-0.613796	-1.25677	-1.75295	-0.50699	-1.07119	-1.39772	-1.99314
AT5G22980	SCPL47 (serine carboxypeptidase-like 47); serine carboxypeptidase	0.512256	0.468829	0.458078	3.49118	3.53839	2.52196	2.07249	3.59939	AT3G05930	GLP8 (GERMIN-LIKE PROTEIN 8); manganese ion binding / metal ion binding / nutrient reservoir	1.87287	1.70109	0.794367	0.755426	1.62997	2.63494	2.10308	1.19218
AT5G23480	hypothetical protein	1.13966	0.335439	0.271	0.360551	-0.0870486	0.597354	0.50091	0.732817	AT3G05950	germin-like protein, putative	-6.86903	-6.88885	-7.48646	-8.25584	-0.964294	-4.62938	-5.6125	-6.70986
AT5G23810	AAP7 (amino acid permease 7); amino acid transmembrane transporter	0.290125	0.480029	0.887391	1.14361	-0.115084	-0.389655	-0.360318	-0.425923	AT3G06390	integral membrane family protein	-0.382225	-0.655671	-0.587581	-1.32023	-0.282162	-0.358071	-0.725519	-0.861244
AT5G24060	hypothetical protein	-0.140412	-0.319252	-0.42264	-1.06906	-0.0965436	0.174749	-0.146795	0.0351436	AT3G06545	hypothetical protein	1.22982	1.20873	1.25334	2.00478	1.80633	4.07255	3.39908	4.7589
AT5G24150	SQP1 (Squalene monooxygenase 1)	0.165498	0.411836	0.87438	1.04518	0.566043	0.0113827	-0.16455	-0.069605	AT3G06760	hypothetical protein	0.290999	0.5994	0.902593	1.00344	0.126455	0.262058	0.342211	0.507849
AT5G24200	triacylglycerol lipase	0.431691	0.781191	1.025	1.10825	-0.647407	0.840239	-0.190398	0.0277533	AT3G06890	hypothetical protein	0.482493	0.830007	1.13446	1.24507	0.606002	0.225229	0.606175	0.376615
AT5G24205	misc_RNA	-0.781117	-0.801192	-1.23509	-1.37151	-0.245981	-0.535768	-0.301874	-1.0438	AT3G06962	misc_RNA	-1.09904	-1.2694	-1.6524	-2.60096	-0.722452	-0.928669	-1.37678	-2.31527
AT5G24420	glucosamine/galactosamine-6-phosphate isomerase-related	0.191902	0.803887	3.82342	3.42489	-0.30821	-0.579993	-0.592216	-1.16236	AT3G07000	DC1 domain-containing protein	-0.896502	-0.771938	-0.958782	-0.919333	-0.487764	-0.795476	-0.897659	-0.860397
AT5G24660	hypothetical protein	1.15056	0.957296	1.19229	1.6158	0.127075	0.126423	-0.05754	0.353997	AT3G07070	protein kinase family protein	-0.429262	-0.946163	-1.57911	-1.93208	-0.768746	-0.587091	-0.85276	-1.42691
AT5G24900	CYP714A2 (cytochrome P450, family 714, subfamily A, polypeptide 2); oxygen binding	-0.577404	-0.58435	-1.15636	-0.964705	-0.0404931	-0.00416278	-0.0329604	0.218915	AT3G07195	proline-rich family protein	-0.790518	-0.467277	-0.285555	-0.558951	-0.844647	-0.989726	-0.485691	-1.53322
AT5G24910	CYP714A1 (cytochrome P450, family 714, subfamily A, polypeptide 1); oxygen binding	-0.271299	-0.596768	-0.891392	-1.27339	-0.335647	-0.103537	-0.413367	-0.246807	AT3G08030	hypothetical protein	0.524012	0.598279	0.782299	0.968428	0.274956	0.403071	0.715757	0.828605
AT5G26170	WRKY50 (WRKY DNA-binding protein 50); transcription factor	1.23917	1.84603	1.69627	0.703109	-0.726666	1.61578	0.828011	1.27347	AT3G08530	clathrin heavy chain, putative	-0.0198004	-0.0248177	-0.294333	-0.317962	-0.196337	-0.104474	-0.102597	-0.018858
AT5G26220	ChaC-like family protein	0.644268	0.515031	1.2423	1.55942	-0.878983	-0.55454	-0.825027	-0.576823	AT3G08770	LTP6 (Lipid transfer protein 6); lipid binding	0.953816	1.2902	1.75399	1.52794	0.179006	0.529297	0.742061	0.612726
AT5G26790	hypothetical protein	0.402652	0.601561	0.91753	1.65972	0.710923	0.153974	0.963481	0.305476	AT3G08860	alanine--glyoxylate aminotransferase, putative / beta-alanine-pyruvate aminotransferase, putative / AGT, putative	1.06951	1.10194	1.28281	1.66493	1.19719	1.1741	0.503337	1.2293
AT5G26930	zinc finger (GATA type) family protein	-0.425612	-1.12911	-1.40305	-1.46393	-0.0738245	-0.217109	-0.57672	-0.714819	AT3G08870	lectin protein kinase, putative	0.645899	0.280333	0.117701	0.159736	0.603049	1.00117	0.373692	0.688927
AT5G27771	pseudo	1.5461	1.44904	1.66207	4.34954	3.09513	2.09734	1.91904	3.10779	AT3G09020	alpha 1,4-glycosyltransferase family protein / glycosyltransferase sugar-binding DXD motif-containing protein	-0.366599	-0.681706	-0.896202	-1.37579	-0.469905	-0.474132	-0.823483	-1.14042
AT5G27780	auxin-responsive family protein	2.47653	2.30198	2.3281	3.0644	2.27806	1.79055	1.12314	2.20066	AT3G09240	protein kinase-related	-0.150269	-0.473923	-0.916117	-1.49621	-0.483873	-0.20231	-0.67532	-0.401517
AT5G27810	sequence-specific DNA binding / transcription factor	1.67746	0.994807	1.27274	1.54708	0.904515	1.77124	1.36135	1.4582	AT3G09280	hypothetical protein	-0.592475	-0.7489	-1.18595	-1.58556	-0.970022	-0.505251	-1.03264	-1.41329
AT5G27940	WPP3 (WPP domain protein 3)	-0.587737	-0.72927	-0.46768	-1.04574	0.308463	0.0754776	-0.276971	-0.278595	AT3G09480	histone H2B, putative	0.329005	0.298164	0.146915	1.16751	1.24551	0.787856	0.75705	1.38984
AT5G28080	WNK9 (Arabidopsis WNK kinase 9); kinase	-0.432601	-0.597299	-0.70287	-1.05289	0.182879	0.394495	0.339872	0.268388	AT3G09870	auxin-responsive family protein	1.48759	1.71494	2.97156	2.58014	2.85648	3.98299	2.67139	2.11055
AT5G33355	hypothetical protein	-1.23008	-2.10444	-3.95264	-3.95977	0.316901	-2.70849	-3.38357	-4.64222	AT3G09910	AtRABC2b/AtRab18C (Arabidopsis Rab GTPase homolog C2b); GTP binding	0.643275	0.520662	0.773676	0.722203	0.71527	1.12179	1.01641	1.08339
AT5G35525	hypothetical protein	1.15331	0.731768	1.38019	1.46291	-1.28585	-0.0857605	-0.371855	0.37324	AT3G10185	hypothetical protein	1.76994	2.0295	2.13374	1.89958	2.22174	2.28846	2.49591	2.27485
AT5G35870	hypothetical protein	1.57394	1.86221	1.90173	1.78378	1.21171	1.26557	1.20918	-0.211194	AT3G10560	CYP77A7/UNE9 (CYTOCHROME P450, FAMILY 77, SUBFAMILY A, POLYPEPTIDE 7); oxygen binding	1.76898	2.08332	2.40462	2.09654	1.30143	1.96295	1.50831	1.65004
AT5G35915	pseudo	-1.94214	-2.26406	-1.92894	-1.34364	0.154379	0.979219	-0.765266	0.0246959	AT3G11110	zinc finger (C3HC4-type RING finger) family protein	-0.606949	-0.316398	-0.237405	-0.216973	-0.36223	-1.2005	-0.812536	-2.11308
AT5G36739	hypothetical protein	1.42198	1.13314	0.589415	1.04795	0.860304	1.381	1.32454	1.32886	AT3G11180	oxidoreductase, 2OG-Fe(II) oxygenase family protein	3.12104	3.13202	3.91969	3.91929	1.79181	3.56612	3.4358	4.29161
AT5G37072	pseudo	-0.587469	-0.58206	-1.12792	-1.17527	0.17653	-0.29969	0.333999	-0.392367	AT3G11260	WOX5 (WUSCHEL-related homeobox 5); transcription factor	1.49911	1.6088	2.37516	2.0753	0.689259	1.4492	1.6113	1.68424
AT5G37770	TCH2 (TOUCH 2); calcium ion binding	0.322579	1.07407	1.38875	1.41242	0.686599	0.255445	0.350712	-0.0394166	AT3G11370	DC1 domain-containing protein	-0.770698	-0.944448	-1.24119	-1.93137	-0.79947	-0.673523	-0.922029	-0.868683
AT5G37840	hypothetical protein	-2.61753	-2.97512	-2.99304	-2.55748	0.641165	-2.48939	-2.86699	-2.93349	AT3G11420	fringe-related protein	0.297075	0.798016	1.07486	1.24829	0.719845	0.532013	0.555845	0.874676
AT5G38130	transferase family protein	1.78473	1.68816	4.83336	4.50662	0.395439	0.265721	-0.0564222	0.565754	AT3G11550	integral membrane family protein	-0.433176	-0.782121	-0.850336	-1.30244	-0.682607	-0.180198	-0.907137	-0.723528
AT5G38230	pseudo	-0.439819	-0.740219	-2.37377	-3.37773	-0.947136	0.313299	-0.601545	-0.601445	AT3G11773	electron carrier/ protein disulfide oxidoreductase	-0.298899	-0.428297	-0.700196	-1.18283	-0.613744	-0.503327	-0.467874	-0.505088
AT5G38320	hypothetical protein	1.22139	1.36465	1.12598	1.17177	0.199686	0.843615	1.33367	0.913601	AT3G12145	FLR1 (FLOR1); enzyme inhibitor	0.447992	0.562902	1.78035	1.44175	0.127246	0.157484	0.0675106	0.0139793
AT5G38910	germin-like protein, putative	-4.02237	-3.39508	-2.72501	-1.21731	-1.9554	-0.907361	0.191153	0.298944	AT3G12203	SCPL17 (serine carboxypeptidase-like 17); serine carboxypeptidase	0.842735	1.27693	1.98667	1.71726	1.02269	0.621724	0.755468	0.893417
AT5G38970	BR6OX1 (BRASSINOSTEROID-6-OXIDASE); oxygen binding	-0.623081	-0.742608	-1.31713	-1.0798	-0.65195	-0.454418	-0.0376558	-1.6603	AT3G12240	SCPL15 (serine carboxypeptidase-like 15); serine carboxypeptidase	-0.587974	-0.773087	-1.19779	-1.59904	-0.68685	-0.616312	-0.718002	-1.17416
AT5G39110	germin-like protein, putative	-1.5851	-1.55287	-1.2144	-0.992779	-0.638236	-0.88534	-0.719408	0.0398036	AT3G12460	3'-5' exonuclease/ nucleic acid binding	0.774347	0.884771	1.22682	1.43707	0.659883	0.58507	0.707885	1.1122
AT5G39370	S-locus glycoprotein, putative	-1.22328	-0.876423	-2.14493	-1.18168	-1.18939	-0.536932	-1.71773	0.0118864	AT3G12520	SULTR4;2 (sulfate transporter 4;2); sulfate transmembrane transporter	0.506349	0.693848	1.05563	1.25743	0.23627	0.265191	0.0718272	0.168433
AT5G39493	hypothetical protein	1.23871	1.18854	1.50028	1.63703	0.363926	0.494003	0.705612	0.841487	AT3G12900	oxidoreductase, 2OG-Fe(II) oxygenase family protein	-2.67472	-2.42703	-2.24235	-2.52631	-0.461239	-2.98514	-3.3069	-2.64271
AT5G39860	PRE1 (PACLOBUTRAZOL RESISTANCE1); DNA binding / transcription factor	1.77515	0.804572	1.17709	0.984369	-0.337892	1.87008	-0.0752509	0.0347709	AT3G13065	SRF4 (STRUBBELIG-RECEPTOR FAMILY 4); ATP binding / kinase/ protein serine/threonine kinase	0.3682	0.277716	0.165683	0.0809687	0.523177	0.823101	1.08831	1.09516
AT5G40000	AAA-type ATPase family protein	0.315266	0.804112	1.47351	1.86312	0.463705	0.483921	0.00374054	0.140618	AT3G13405	misc_RNA	1.06441	1.3708	1.16627	1.63101	0.703696	0.639828	1.00378	0.827107
AT5G40320	DC1 domain-containing protein	-0.990622	-0.875101	-2.02118	-2.105	-0.28201	-0.37707	0.0831232	-0.494211	AT3G13530	MAPKKK7 (MAP3K EPSILON PROTEIN KINASE); kinase	-0.416152	-0.333105	-0.521591	-0.732991	-0.522024	-0.549217	-0.638665	-0.611782
AT5G40690	hypothetical protein	-0.288424	-0.56081	-0.799686	-1.38053	-0.504572	-0.124204	-0.8001	-0.784696	AT3G13600	calmodulin-binding family protein	-0.570281	-0.95108	-1.36339	-1.95731	-0.514903	-0.194657	-0.419822	-1.07443
AT5G41400	zinc finger (C3HC4-type RING finger) family protein	0.156049	0.507598	1.228	2.21231	0.114565	0.393741	0.776556	0.121855	AT3G13760	DC1 domain-containing protein	-0.624503	-0.496621	-0.54666	-0.576383	-0.59177	-0.910151	-1.19087	-0.869409
AT5G41860	hypothetical protein	0.514953	0.555897	0.874985	1.17355	0.48873	0.54232	0.28639	0.986593	AT3G13784	ATCWINV5 (ARABIDOPSIS THALIANA CELL WALL INVERTASE 5); hydrolase, hydrolyzing O-glycosyl compounds	3.32789	3.38465	3.06597	3.16077	3.23137	3.05225	3.34513	2.97808
AT5G41900	hydrolase, alpha/beta fold family protein	1.01821	1.05668	1.33809	0.859832	0.0257934	0.663594	0.701909	0.43573	AT3G13840	scarecrow transcription factor family protein	-1.21367	-1.33866	-1.24881	-1.32915	-1.13537	-1.039	-1.29508	-1.09295
AT5G42210	hypothetical protein	-0.268384	-0.560387	-1.05352	-1.4473	0.0323801	0.239053	-0.365486	-0.42662	AT3G13950	hypothetical protein	0.401875	0.888351	1.6289	1.67988	0.830635	1.86049	1.91885	2.66445
AT5G42235	Expressed protein	1.16278	1.26499	2.74127	4.12654	0.980275	2.03991	2.10394	2.16804	AT3G13980	hypothetical protein	-0.669933	-0.572734	-0.861118	-1.59402	-0.341488	-0.554184	-0.593473	-1.37847
AT5G42530	hypothetical protein	-0.343845	-0.27269	-1.29615	-2.69694	0.119859	0.936373	0.938396	0.633337	AT3G14010	CID4 (CTC-Interacting Domain 4); protein binding	-0.568041	-0.304589	-0.3373	-0.452887	-0.495253	-0.768043	-0.310076	-1.18585
AT5G42630	ATS/KAN4 (ABERRANT TESTA SHAPE); DNA binding / transcription factor	-0.37058	-0.430574	-0.973776	-1.09562	-0.0988153	-0.392156	-0.224159	-0.549836	AT3G14020	CCAAT-binding transcription factor (CBF-B/NF-YA) family protein	-0.776415	-0.812309	-0.587652	-0.68014	-0.840948	-1.20233	-0.936609	-1.41445
AT5G42680	hypothetical protein	0.739275	0.971001	1.08257	0.834872	0.31086	0.234316	0.132492	0.13806	AT3G14025	pseudo	3.00253	3.44746	1.63508	1.84647	-0.521149	-0.078306	-0.507603	1.3614
AT5G42710	hypothetical protein	-0.114974	-0.303142	-0.644709	-1.49031	0.155254	0.312057	0.10121	-0.343011	AT3G14060	hypothetical protein	1.13196	0.935437	1.24174	1.92328	1.2819	0.946246	0.823856	1.38646
AT5G43175	basic helix-loop-helix (bHLH) family protein	-0.557472	-1.04186	-2.48051	-2.69838	-0.580524	-0.663857	-1.83787	-2.69981	AT3G14090	ATEXO70D3 (exocyst subunit EXO70 family protein D3); protein binding	-0.271551	-0.339557	-0.535329	-1.02205	-0.445001	-0.21265	-0.472252	-0.338112
AT5G43380	TOPP6 (Type one serine/threonine protein phosphatase 6); protein serine/threonine phosphatase	0.456831	0.925716	1.06794	1.37565	0.477105	0.365665	0.325835	0.487208	AT3G14360	lipase class 3 family protein	0.596268	0.675343	0.901752	1.02399	0.731743	0.700336	0.855646	1.11739
AT5G43401	hypothetical protein	-3.65941	-2.15378	-2.42652	-0.948964	-0.648867	-2.46146	-0.668195	0.39507	AT3G14362	DVL19/RTFL10 (ROTUNDIFOLIA LIKE 10)	-0.576891	-0.41963	-1.16046	-0.999221	-0.194463	-0.200414	-0.264428	-0.613434
AT5G43620	S-locus protein-related	0.325945	0.483426	0.579036	1.0564	-0.153697	-0.106588	-0.102402	0.0328078	AT3G14380	integral membrane family protein	0.470123	0.470644	0.780914	0.933319	0.514834	0.144066	0.172619	0.742012
AT5G43780	APS4	-0.572788	-0.633312	-0.771657	-0.753868	0.0157315	-0.333945	-0.568902	-0.26954	AT3G14450	CID9 (CTC-Interacting Domain 9); RNA binding / protein binding	0.779195	0.691567	1.25029	1.52931	1.25507	1.16924	1.27746	1.74235
AT5G44065	hypothetical protein	-0.984552	-1.58082	-2.4721	-2.85453	-0.0419459	-0.325844	-0.77771	-1.70486	AT3G14510	geranylgeranyl pyrophosphate synthase, putative / GGPP synthetase, putative / farnesyltranstransferase, putative	-0.518014	-0.378253	-1.29734	-1.57356	-0.820537	-0.66461	-0.662087	-1.09436
AT5G44130	FLA13 (FASCICLIN-LIKE ARABINOGALACTAN PROTEIN 13 PRECURSOR)	-0.768948	-0.740601	-1.13849	-1.19565	-0.0606677	-0.624835	-0.81638	-1.13122	AT3G14780	hypothetical protein	-0.805088	-0.525768	-0.865707	-1.4542	-0.600862	-1.03513	-1.23609	-1.33138
AT5G44417	pseudo	-0.383444	-1.07447	-1.53237	-2.18416	-0.683217	0.268445	0.0420765	-0.76042	AT3G14940	ATPPC3 (PHOSPHOENOLPYRUVATE CARBOXYLASE 3); phosphoenolpyruvate carboxylase	0.531441	0.537968	0.547977	0.695476	0.101175	0.707901	0.48048	1.05083
AT5G44990	hypothetical protein	-2.99242	-2.00808	-1.9361	-1.71516	-2.11532	-0.826753	0.000598238	0.0696587	AT3G15020	malate dehydrogenase (NAD), mitochondrial, putative	0.830475	0.951759	1.04316	1.06106	0.594818	0.921186	0.90682	1.13355
AT5G45105	ZIP8 (ZINC TRANSPORTER 8 PRECURSOR); cation transmembrane transporter	1.61776	1.36387	2.67267	5.3063	5.02093	1.94144	0.533059	3.70421	AT3G15240	hypothetical protein	-0.972259	-0.86967	-1.96637	-2.54146	-0.836225	-0.495483	-0.236078	-0.774734
AT5G45200	disease resistance protein (TIR-NBS-LRR class), putative	-0.540038	-0.578536	-1.78618	-1.4692	-0.885138	-0.303697	-0.199931	-0.467739	AT3G15280	hypothetical protein	0.849196	1.18666	1.25735	1.85364	1.3625	1.01887	1.16109	1.96199
AT5G45210	disease resistance protein (TIR-NBS-LRR class), putative	-0.787054	-0.421093	-1.13696	-0.937807	-0.182725	0.0183166	-0.0378175	0.0476387	AT3G15356	legume lectin family protein	-1.24172	-2.08587	-3.25463	-4.1249	-1.9789	-1.36247	-1.7789	-1.24337
AT5G45670	GDSL-motif lipase/hydrolase family protein	0.443973	0.742149	0.953044	0.944094	0.350431	0.161773	0.0844538	0.303563	AT3G15370	ATEXPA12 (ARABIDOPSIS THALIANA EXPANSIN 12)	-1.6489	-2.02525	-2.54351	-3.46968	-1.48189	-1.88631	-2.52971	-3.1277
AT5G45850	hypothetical protein	1.19419	0.927124	1.25485	0.961662	0.0352407	0.353148	0.00450576	0.347206	AT3G15450	hypothetical protein	-0.955635	-1.09339	-1.35019	-2.28863	-0.755583	-0.903511	-1.16605	-2.20367
AT5G46130	hypothetical protein	0.275051	1.04538	1.59537	1.81971	0.428339	-0.140596	0.0130785	-0.576132	AT3G15630	hypothetical protein	-0.684257	-0.482132	-0.290765	-0.413791	-0.371081	-0.767595	-0.753067	-1.55648
AT5G46370	KCO2 (CA2+ ACTIVATED OUTWARD RECTIFYING K+ CHANNEL 2); calcium ion binding / outward rectifier potassium channel	2.7532	3.0866	2.28449	1.91304	1.82083	2.444	0.897276	0.691102	AT3G15670	late embryogenesis abundant protein, putative / LEA protein, putative	1.59892	2.65531	2.09314	4.40347	1.30939	1.89256	2.63797	3.71042
AT5G46410	NLI interacting factor (NIF) family protein	-0.830213	-0.907306	-1.27846	-1.05466	0.25116	0.259342	0.417617	0.19438	AT3G15720	glycoside hydrolase family 28 protein / polygalacturonase (pectinase) family protein	1.34483	1.44324	2.81101	3.21265	1.82573	2.44012	2.34256	2.05749
AT5G46500	hypothetical protein	0.479648	1.00947	1.19238	1.17424	-0.0458688	0.354216	-0.149308	0.430619	AT3G15740	zinc finger (C3HC4-type RING finger) family protein	0.649533	0.843712	0.906964	0.929736	0.603616	1.18516	1.18775	1.25652
AT5G46720	hypothetical protein	0.432816	0.574363	0.815326	1.0091	0.450171	0.116617	0.0906193	0.127715	AT3G15780	hypothetical protein	0.493096	0.589963	0.92903	1.25349	1.08869	0.590511	0.715089	0.97704
AT5G46871	hypothetical protein	1.64684	1.60156	1.25914	1.26011	0.170336	0.107807	-0.175403	-0.519357	AT3G15790	MBD11 (methyl-CpG-binding domain 11); DNA binding	0.46119	0.671736	1.07077	1.00124	0.606529	0.586529	0.689549	1.01744
AT5G46874	hypothetical protein	2.08028	2.09651	1.82665	1.92029	1.19703	1.25951	0.551486	0.123283	AT3G16150	L-asparaginase, putative / L-asparagine amidohydrolase, putative	-0.763193	-1.05543	-1.26016	-0.715239	-1.2026	-0.64396	-0.655878	-0.359543
AT5G47020	glycine-rich protein	-0.213039	-0.231691	-0.540202	-1.16372	-0.679568	-0.268372	-0.513472	-0.440569	AT3G16240	DELTA-TIP (delta tonoplast integral protein); water channel	0.404376	0.118483	-0.0239572	0.145601	0.168132	-0.0777334	-0.337051	-0.760123
AT5G47370	HAT2; transcription factor	-0.112232	-0.477423	-0.869626	-1.06204	-0.0571627	-0.145135	-0.400318	-0.547665	AT3G16440	ATMLP-300B (MYROSINASE-BINDING PROTEIN-LIKE PROTEIN-300B)	-0.466685	-0.858108	-1.42329	-1.77525	-0.554536	-0.283977	-0.557771	-0.714287
AT5G47450	AtTIP2;3 (Arabidopsis thaliana tonoplast intrinsic protein 2;3); water channel	-0.267089	-1.16785	-1.25612	-3.79121	1.81984	2.12166	1.34309	1.34351	AT3G16520	UDP-glucoronosyl/UDP-glucosyl transferase family protein	0.277018	0.281414	0.41649	0.416171	0.245833	0.271871	0.21447	0.510781
AT5G47600	heat shock protein-related	-1.3739	-1.17532	-0.844028	-0.909939	-0.29267	-0.630588	0.333889	0.271058	AT3G16530	legume lectin family protein	-0.653106	-1.35347	-2.14489	-2.73614	-2.39641	-1.46886	-1.71959	-0.878289
AT5G48110	terpene synthase/cyclase family protein	-0.875302	-0.97551	-2.16816	-2.20261	-0.357239	0.00257158	0.25005	-0.302788	AT3G16660	hypothetical protein	-0.6974	-1.40693	-0.991157	-0.57113	-1.04778	-0.914764	-0.739593	-0.975266
AT5G48375	TGG3 (THIOGLUCOSIDE GLUCOSIDASE 3); hydrolase, hydrolyzing O-glycosyl compounds	0.284375	0.198592	0.204424	2.17098	2.05579	1.29665	0.851908	2.2047	AT3G16670	hypothetical protein	-0.445657	-2.35928	-3.52383	-4.91343	-2.56855	-1.77708	-2.46674	-2.52505
AT5G48710	ubiquitin-related	1.80005	1.53843	1.43671	2.01928	1.45505	2.06704	1.91842	2.52418	AT3G16690	nodulin MtN3 family protein	-0.992773	-1.11784	-0.666552	-0.385402	-0.303511	-0.516654	-0.700161	-1.1259
AT5G48850	male sterility MS5 family protein	1.32001	1.1535	1.64207	2.11601	-0.0104866	0.472651	-0.512877	0.482268	AT3G16700	fumarylacetoacetate hydrolase family protein	0.20609	0.190325	0.0888185	0.730933	0.799884	0.541576	0.544086	1.01692
AT5G48940	leucine-rich repeat transmembrane protein kinase, putative	-0.665697	-0.451014	-1.49906	-1.93584	-0.43421	-0.397955	-0.0052337	-0.605371	AT3G16850	glycoside hydrolase family 28 protein / polygalacturonase (pectinase) family protein	-0.0575168	-0.0631163	-0.0327729	-0.482735	-0.461611	-0.565994	-0.329674	-1.30421
AT5G49340	hypothetical protein	-0.405978	-0.492511	-1.04483	-1.37891	-0.223392	-0.267087	-0.126825	-0.164229	AT3G17050	pseudo	0.436305	0.552074	1.93965	2.16015	0.492843	1.40382	1.20016	1.20858
AT5G49360	BXL1 (BETA-XYLOSIDASE 1); hydrolase, hydrolyzing O-glycosyl compounds	-0.687705	-0.55708	-0.84846	-1.05528	-0.0453388	-0.521424	-1.08971	-1.71298	AT3G17070	peroxidase, putative	0.463431	0.410383	0.445023	0.608602	0.95927	0.981714	1.06547	1.15065
AT5G50030	invertase/pectin methylesterase inhibitor family protein	-1.1944	-0.722022	-0.771221	-0.938945	0.124472	0.121434	0.374019	0.12636	AT3G17520	late embryogenesis abundant domain-containing protein / LEA domain-containing protein	3.06765	3.19566	2.90455	5.43908	4.8502	4.62022	5.1555	6.17923
AT5G50590	ATHSD4 (HYDROXYSTEROID DEHYDROGENASE 4); oxidoreductase	-0.409948	-1.11434	-1.18815	-1.14617	-0.320815	-0.142343	-0.469611	-1.39579	AT3G17690	ATCNGC19 (cyclic nucleotide gated channel 19); calmodulin binding / cyclic nucleotide binding / ion channel	-1.11313	-0.838454	-0.649275	-0.694497	-1.09023	-0.346542	-0.559494	-0.748226
AT5G50800	nodulin MtN3 family protein	0.987315	1.32448	1.90311	2.18528	0.0524966	0.355692	0.474168	0.911777	AT3G18000	NMT1 (N-METHYLTRANSFERASE 1); phosphoethanolamine N-methyltransferase	1.38497	1.06657	1.22626	1.44859	0.531509	0.459697	0.382505	0.764741
AT5G50940	pseudo	-0.376179	-0.352256	-0.670646	-1.10536	0.177034	-0.0803769	0.166954	-0.255983	AT3G18035	HON4; DNA binding	-0.350922	-0.18568	-0.770396	-1.22664	-0.956203	-0.267288	-0.198995	-0.910869
AT5G51500	pectinesterase family protein	-0.290129	-0.357591	-1.26106	-1.58186	-0.579765	0.0133599	-0.292398	-0.451989	AT3G18410	NADH-ubiquinone oxidoreductase-related	0.165738	0.185262	0.153037	0.260203	0.146108	0.269061	0.335744	0.298792
AT5G51670	hypothetical protein	-1.43719	-0.56516	-0.521375	-0.175782	0.0203857	-1.51428	-0.0819339	-2.71108	AT3G18450	hypothetical protein	-0.641579	-1.04326	-2.3642	-4.21442	-1.30106	-1.00809	-2.18091	-3.50865
AT5G51790	basix helix-loop-helix (bHLH) family protein	-0.93262	-1.50514	-1.17538	-0.84832	-0.46465	-0.145968	-0.591179	-0.90328	AT3G18460	hypothetical protein	-0.524511	-0.979425	-2.68342	-4.13673	-0.865329	-0.689853	-2.01049	-3.30394
AT5G52000	importin alpha-1 subunit, putative	0.676449	0.573876	0.893418	1.1001	0.186742	0.788586	0.987115	1.13874	AT3G18777	pseudo	1.71082	1.77865	2.39887	1.65355	2.55987	1.39395	-0.578068	2.55292
AT5G52120	ATPP2-A14 (Phloem protein 2-A14); carbohydrate binding	-0.768571	-1.04343	-0.94621	-0.94815	0.0683206	-0.382603	-0.65251	-1.03163	AT3G19040	HAF2/TAF1/TAF1B (HISTONE ACETYLTRANSFERASE OF THE TAFII250 FAMILY, TBP-ASSOCIATED FACTOR 1B); DNA binding / transcription cofactor	-0.911841	-1.50963	-1.98032	-2.6426	-0.773694	-0.54202	-0.9608	-0.843584
AT5G52130	hypothetical protein	-0.585941	-0.644745	-0.61376	-0.620689	-0.625579	-0.66901	0.494435	-0.581396	AT3G19170	ATPREP1/ATZNMP (PRESEQUENCE PROTEASE 1); metalloendopeptidase	-0.084951	-0.0531526	-0.214603	-0.302184	0.0869156	-0.167453	-0.297419	-0.0842472
AT5G52260	AtMYB19 (myb domain protein 19); DNA binding / transcription factor	-0.137277	-0.89007	-1.11036	-1.60695	-0.35284	0.0575367	-0.745775	-1.36093	AT3G19190	hypothetical protein	-0.385793	-0.413474	-0.701822	-1.09457	-0.742304	-0.506189	-0.691536	-0.833476
AT5G52670	heavy-metal-associated domain-containing protein	1.53416	1.21525	1.34088	1.39371	0.131252	1.0951	0.740801	1.36709	AT3G19350	polyadenylate-binding protein-related / PABP-related	3.16828	3.06243	3.04921	2.66969	2.33529	2.91581	3.11925	3.12402
AT5G52760	heavy-metal-associated domain-containing protein	1.17964	1.60817	1.51085	0.953153	0.604277	2.10517	1.02035	1.30262	AT3G19620	glycosyl hydrolase family 3 protein	0.807777	1.10522	0.838393	0.538623	2.21792	1.80171	1.96335	1.71381
AT5G52780	hypothetical protein	0.146773	-0.334767	-0.650802	-0.807414	0.137194	0.367295	0.175775	0.103717	AT3G20360	meprin and TRAF homology domain-containing protein / MATH domain-containing protein	-0.529827	-0.561841	-1.42425	-1.87459	-1.97841	-2.0783	-2.7369	-3.08363
AT5G53250	AGP22/ATAGP22 (ARABINOGALACTAN PROTEINS 22)	-0.518713	-0.818764	-1.13109	-1.48279	-0.199865	-0.0336174	-0.133013	-1.23912	AT3G20380	meprin and TRAF homology domain-containing protein / MATH domain-containing protein	-0.422652	-0.598158	-0.543	-0.316803	-1.14862	-1.07446	-1.22009	-0.500113
AT5G53450	ORG1 (OBP3-RESPONSIVE GENE 1); kinase	0.736726	1.19535	1.00571	1.36981	0.671277	-0.26474	-0.419495	-0.0800006	AT3G20470	pseudo	0.339334	0.661756	2.42745	2.75081	1.485	3.00014	3.35212	3.56489
AT5G53590	auxin-responsive family protein	0.358512	0.589463	0.91066	1.27843	0.575115	0.238274	0.424629	0.207231	AT3G20840	PLT1 (PLETHORA 1); transcription factor	-0.880196	-0.617187	-1.51081	-2.28596	-0.873793	-0.788412	-0.312145	-1.15382
AT5G53660	AtGRF7 (GROWTH-REGULATING FACTOR 7)	-0.291848	-0.579923	-0.761564	-1.36559	-0.257612	-0.160365	0.326374	0.629508	AT3G21080	ABC transporter-related	-0.78523	-0.3034	-0.198123	-0.623198	-2.32589	-1.43219	-1.87475	-2.5122
AT5G54170	hypothetical protein	0.447245	0.637284	1.22077	1.19457	0.100721	0.182696	-0.017851	0.0235045	AT3G21090	ABC transporter family protein	0.507027	0.605066	0.778618	0.94292	0.861042	1.50289	1.52532	1.60052
AT5G54490	PBP1 (PINOID-BINDING PROTEIN 1); calcium ion binding	-0.813756	-1.30328	-1.20319	-1.31972	-0.12442	0.1356	-0.405589	-0.503229	AT3G21460	electron carrier/ protein disulfide oxidoreductase	0.786987	0.488004	0.264403	0.414969	0.932325	0.865014	0.847784	0.662917
AT5G54690	GAUT12/IRX8/LGT6 (GALACTURONOSYLTRANSFERASE 12); polygalacturonate 4-alpha-galacturonosyltransferase/ transferase, transferring glycosyl groups / transferase, transferring hexosyl groups	-0.104072	-0.159847	-0.45263	-1.12617	0.33091	0.145385	0.0130662	-0.0770663	AT3G21550	hypothetical protein	-0.486548	-0.572163	-0.99476	-1.39826	-0.129227	-0.194244	-0.381182	-0.672085
AT5G54790	hypothetical protein	-0.210636	-0.660231	-1.28528	-2.09367	0.138991	-0.345516	-0.96174	-1.03034	AT3G21560	UGT84A2; UDP-glycosyltransferase/ sinapate 1-glucosyltransferase	-1.14273	-0.597016	-0.496639	-0.330979	-0.782752	-1.31014	-0.747763	-1.42275
AT5G54800	GPT1 (glucose-6-phosphate transporter 1); antiporter/ glucose-6-phosphate transmembrane transporter	0.230522	0.344355	0.308626	1.02581	0.103545	0.202384	0.29855	0.635802	AT3G21620	early-responsive to dehydration protein-related / ERD protein-related	1.11255	1.0028	0.976479	0.851688	0.652153	1.04724	0.902691	1.34588
AT5G55040	hypothetical protein	-0.732311	-0.320517	-0.888141	-1.50837	-0.922321	-0.815756	-0.373035	-1.43164	AT3G22250	UDP-glucoronosyl/UDP-glucosyl transferase family protein	-1.64141	-2.41827	-3.50966	-5.65292	-1.5456	-1.62085	-1.97842	-2.70301
AT5G55110	stigma-specific Stig1 family protein	0.687643	0.888729	0.888526	1.01916	0.133625	0.444261	0.668072	0.546563	AT3G22400	LOX5; lipoxygenase	-0.375468	-0.481427	-1.0407	-1.34507	-0.29165	-0.193211	-0.470268	-0.410539
AT5G55250	IAMT1 (IAA CARBOXYLMETHYLTRANSFERASE 1); S-adenosylmethionine-dependent methyltransferase	0.0435487	-0.720791	-0.706545	-1.15244	-0.210486	0.137751	-0.353332	0.157912	AT3G22550	senescence-associated protein-related	0.380134	0.460632	0.964455	1.29454	0.480946	0.624719	0.726174	0.872677
AT5G55330	membrane bound O-acyl transferase (MBOAT) family protein / wax synthase-related	0.599773	0.594969	1.14613	0.767972	0.228563	0.455483	0.443186	-0.0610664	AT3G22600	protease inhibitor/seed storage/lipid transfer protein (LTP) family protein	-0.744942	-0.829155	-0.764605	-1.02601	-0.435	-0.501295	-1.07041	-0.977535
AT5G55450	protease inhibitor/seed storage/lipid transfer protein (LTP) family protein	-0.661666	-0.403761	-1.09602	-0.873824	-0.224505	0.881914	0.797296	1.68257	AT3G22750	protein kinase, putative	-0.65963	-0.428011	-0.501042	-0.496171	-0.197102	-0.814659	-0.449429	-1.30728
AT5G55460	protease inhibitor/seed storage/lipid transfer protein (LTP) family protein	-0.216647	-0.363726	-1.03102	-1.80084	-1.46694	0.518183	-0.105265	0.109629	AT3G22800	leucine-rich repeat family protein / extensin family protein	-0.362625	-0.259818	-0.478538	-0.956694	-0.714453	-0.86604	-1.02191	-1.24604
AT5G56300	GAMT2; S-adenosylmethionine-dependent methyltransferase/ gibberellin carboxyl-O-methyltransferase	-1.48418	-0.976502	-1.81789	-2.13971	-0.470995	-0.92146	-0.273859	-1.56	AT3G22840	ELIP1 (EARLY LIGHT-INDUCABLE PROTEIN); chlorophyll binding	-0.913841	-1.00609	-0.989696	-0.617729	-1.14966	-1.3347	-1.36302	-1.38339
AT5G56870	BGAL4 (beta-galactosidase 4); beta-galactosidase	-1.05464	-1.31544	-1.05293	-0.330762	-0.100266	-1.00769	-0.867109	-1.87876	AT3G22910	calcium-transporting ATPase, plasma membrane-type, putative / Ca(2+)-ATPase, putative (ACA13)	0.354525	0.556366	1.74908	1.58563	0.261904	0.555995	0.298982	0.0795912
AT5G56990	hypothetical protein	-0.49431	-0.459323	-0.683463	-1.21591	-0.326523	-0.838716	-0.622776	-1.66086	AT3G23120	leucine-rich repeat family protein	0.889283	1.3244	1.13897	0.397447	0.358283	2.2261	1.18573	1.5949
AT5G57380	VIN3 (VERNALIZATION INSENSITIVE 3); protein binding / zinc ion binding	2.65275	1.82296	2.93375	3.00545	1.00923	2.02477	2.03244	1.75171	AT3G23150	ETR2 (ETHYLENE RESPONSE 2); receptor	-0.449714	-0.278318	-0.793985	-1.01998	-0.492479	-0.584448	-0.548061	-0.737282
AT5G57760	hypothetical protein	-0.207576	-0.119766	-0.406926	-0.738527	0.514976	0.552181	0.778258	1.55242	AT3G23460	cyclopropane fatty acid synthase-related	1.04887	-1.67195	-0.118638	-0.971725	1.06648	-1.2919	-1.42143	-1.47864
AT5G57980	eukaryotic rpb5 RNA polymerase subunit family protein	-0.503026	-0.397924	-1.26315	-1.6216	-0.366056	-0.17335	-0.0129646	-0.201059	AT3G23470	cyclopropane-fatty-acyl-phospholipid synthase	-0.944661	-0.908085	-1.51896	-1.59716	-0.479017	-0.411497	-0.475535	-0.830135
AT5G58120	disease resistance protein (TIR-NBS-LRR class), putative	0.616732	1.52301	1.89904	1.86027	0.267558	0.548546	0.158052	0.536872	AT3G23510	cyclopropane fatty acid synthase, putative / CPA-FA synthase, putative	-0.471749	-0.549397	-0.86214	-1.09043	-0.567582	-0.37347	-0.552318	-0.51457
AT5G58400	peroxidase, putative	1.95052	1.76611	2.48877	1.76241	1.67505	1.48175	1.13114	0.286737	AT3G23530	cyclopropane fatty acid synthase, putative / CPA-FA synthase, putative	-0.361952	-0.42597	-0.971026	-1.20075	-0.612715	-0.296497	-0.416407	-0.513813
AT5G58670	ATPLC1 (PHOSPHOLIPASE C 1); phospholipase C	-0.214267	-0.480689	-0.584976	-1.20306	0.292506	0.0196675	-0.297588	-0.454846	AT3G23550	MATE efflux family protein	-1.78787	-2.36772	-4.15675	-4.42605	-2.13788	-2.9465	-2.76586	-2.23036
AT5G58784	dehydrodolichyl diphosphate synthase, putative / DEDOL-PP synthase, putative	-0.445514	-0.601894	-1.5117	-2.07492	-0.457257	0.0442574	-0.0597131	-0.309232	AT3G23570	dienelactone hydrolase family protein	0.419134	0.633813	1.10988	1.32154	0.794716	0.552294	0.813651	1.05348
AT5G59270	lectin protein kinase family protein	-0.207095	-0.623485	-0.851998	-1.04894	0.040414	-0.00263275	-1.12885	0.699974	AT3G23630	ATIPT7 (Arabidopsis thaliana isopentenyltransferase 7); transferase, transferring alkyl or aryl (other than methyl) groups	1.23088	1.57558	1.76318	1.83234	1.17706	1.37061	1.86459	2.24214
AT5G59580	UDP-glucoronosyl/UDP-glucosyl transferase family protein	2.51543	2.15154	3.84086	3.29184	0.550352	2.1174	1.45191	2.88242	AT3G23930	hypothetical protein	0.555729	0.431188	0.529606	0.545167	0.537502	0.789123	0.597731	1.07986
AT5G60490	FLA12 (fasciclin-like arabinogalactan-protein 12)	-1.06209	-0.252759	-0.35571	-0.230087	0.0333307	-1.59844	-0.402311	-2.72172	AT3G24210	ankyrin repeat family protein	-0.418708	-0.730461	-1.57768	-1.93039	-0.423089	-0.248181	-0.478427	-0.829729
AT5G60660	PIP2;4/PIP2F (plasma membrane intrinsic protein 2;4); water channel	-0.224558	-0.923381	-1.22195	-2.00515	0.142837	0.514549	-0.11856	-0.0288213	AT3G24240	leucine-rich repeat transmembrane protein kinase, putative	-0.764976	-0.544187	-1.27456	-1.43611	-0.315663	-0.486763	-0.16767	-0.668202
AT5G60910	AGL8 (AGAMOUS-LIKE 8); transcription factor	-0.536584	-0.695642	-0.902607	-1.49524	0.467521	-0.514914	-0.374226	-0.576471	AT3G24510	hypothetical protein	-3.74734	-3.75102	-3.7773	-3.36232	-3.73911	-3.63846	-3.61059	-1.61229
AT5G61070	HDA18 (histone deacetylase 18); histone deacetylase	-0.0979225	-0.462058	-0.830181	-1.29397	-0.472084	0.250384	0.257773	0.687553	AT3G24750	hypothetical protein	-0.0489045	-0.409235	-0.977491	-1.74641	-0.342896	-0.266823	-0.196766	-0.932887
AT5G61412	hypothetical protein	0.938449	0.9954	1.24789	0.793696	-0.0340384	0.676573	0.801145	0.846722	AT3G24770	CLE41 (CLAVATA3/ESR-RELATED 41); receptor binding	0.695472	0.801324	1.09289	0.945658	0.346154	0.509046	0.747793	0.776622
AT5G61490	hypothetical protein	0.986072	0.842148	1.18389	1.25182	-0.106386	0.323161	0.163549	0.653761	AT3G24790	kinase	2.39206	3.60493	4.37288	4.53331	2.52144	3.24835	3.96073	4.85553
AT5G61600	ethylene-responsive element-binding family protein	-0.828749	-0.937273	-1.09946	-1.38811	-0.0417027	-0.428317	-0.698382	-0.926209	AT3G25290	auxin-responsive family protein	0.505759	0.734817	0.462179	0.628004	1.01121	0.639342	1.10452	1.19844
AT5G61610	glycine-rich protein / oleosin	-1.26529	-1.62009	-1.94944	-2.21786	-1.32062	-0.450588	-0.127525	0.0369636	AT3G25770	AOC2 (ALLENE OXIDE CYCLASE 2)	0.249531	0.540276	1.75937	1.79832	0.594223	0.398957	0.55163	0.552339
AT5G62340	invertase/pectin methylesterase inhibitor family protein	-0.408112	-0.645589	-1.92377	-2.05747	-0.0788704	0.15628	0.275639	-0.220419	AT3G25795	misc_RNA	1.25179	1.44641	2.51975	2.63835	1.12117	1.50963	1.84436	2.08137
AT5G62850	ATVEX1 (VEGETATIVE CELL EXPRESSED1)	2.1947	1.88708	2.50613	2.47356	2.10513	2.03903	2.37993	1.03008	AT3G25882	NIMIN-2 (NIM1-INTERACTING 2)	0.427883	1.05122	0.960467	1.00568	0.348941	1.01215	0.729016	0.64978
AT5G63130	octicosapeptide/Phox/Bem1p (PB1) domain-containing protein	0.562011	0.515749	0.905754	1.18941	-0.043677	0.296862	0.19143	0.3677	AT3G25930	universal stress protein (USP) family protein	-0.316426	-0.687719	-0.78161	-1.49886	-0.729181	-0.333536	-0.83934	-1.14648
AT5G63225	hypothetical protein	3.00419	2.32667	2.77465	1.81894	0.219395	0.944897	0.238812	-0.0472045	AT3G25990	DNA-binding protein GT-1-related	1.03874	1.16813	1.64546	1.64984	0.577013	0.74927	0.657343	1.08402
AT5G63660	LCR74/PDF2 (Low-molecular-weight cysteine-rich 74)	-0.61934	-0.363165	-1.40512	-1.66644	-0.570791	-0.325817	-0.000858991	-0.855682	AT3G26200	CYP71B22 (cytochrome P450, family 71, subfamily B, polypeptide 22); oxygen binding	-2.7903	-4.33896	-6.7092	-8.05084	-2.0871	-3.42508	-4.75644	-3.914
AT5G64110	peroxidase, putative	0.667052	0.973134	0.931459	1.22251	0.0103236	0.941767	1.65132	1.53416	AT3G26230	CYP71B24 (cytochrome P450, family 71, subfamily B, polypeptide 24); oxygen binding	0.567881	0.630651	0.566807	0.0146045	1.29861	1.28156	1.03525	1.22103
AT5G64260	phosphate-responsive protein, putative	-0.435903	-0.356325	-0.575718	-0.964711	-0.18395	-0.230408	-0.500828	-0.472697	AT3G26330	CYP71B37 (cytochrome P450, family 71, subfamily B, polypeptide 37); oxygen binding	-1.11939	-1.47634	-1.56333	-1.94778	-0.904728	-0.940544	-1.51607	-1.48395
AT5G64450	hypothetical protein	0.29176	0.764472	1.09668	1.26002	0.175162	0.0350481	-0.0238617	-0.202332	AT3G26450	major latex protein-related / MLP-related	0.421846	0.400087	0.992655	1.10399	0.229223	0.439882	0.0870177	0.239433
AT5G64490	binding	0.53583	0.565274	1.01686	1.2681	-0.0456561	0.191262	0.295598	0.0833955	AT3G26460	major latex protein-related / MLP-related	0.379294	0.26313	0.921538	1.13432	0.439965	0.868687	0.550157	0.851508
AT5G64720	hypothetical protein	1.52599	3.19156	1.88764	2.19554	0.755082	0.707789	2.2507	1.10185	AT3G26480	transducin family protein / WD-40 repeat family protein	0.416049	0.598415	0.407753	0.523118	0.775253	0.696622	0.90839	1.01482
AT5G64810	WRKY51 (WRKY DNA-binding protein 51); transcription factor	-1.02141	-0.406011	-1.01109	-1.53088	-0.71121	0.849525	0.108688	0.578154	AT3G26812	misc_RNA	1.42043	1.74694	1.34306	1.83046	1.19056	1.02084	1.11355	0.787936
AT5G65165	SDH2-3 (Succinate dehydrogenase 2-3)	-0.606833	-1.24013	-1.37444	-0.307093	0.176933	-0.638122	-0.476694	-0.34175	AT3G26818	misc_RNA	2.69897	2.09488	1.38364	2.01433	2.22082	2.10014	2.06619	2.20694
AT5G65550	UDP-glucoronosyl/UDP-glucosyl transferase family protein	-1.13585	-1.72278	-2.96354	-2.09548	-0.00388707	-1.05353	-1.39697	-1.57192	AT3G26819	misc_RNA	2.74084	1.73359	3.29958	1.28465	2.43468	1.23523	1.95582	0.826098
AT5G65850	F-box family protein	-0.696864	-0.821852	-0.910003	-1.11538	0.193829	0.0691255	0.19668	0.542853	AT3G26935	zinc finger (DHHC type) family protein	-0.579286	-0.118242	-0.119503	-0.373513	-0.511376	-0.968503	-0.282909	-1.73138
AT5G66170	hypothetical protein	-1.29438	-1.59965	-1.316	-0.778224	-0.12652	0.189608	-0.299003	-0.517447	AT3G26960	hypothetical protein	0.394466	0.577218	1.0212	1.1189	0.714051	0.374382	0.46396	0.525527
AT5G66280	GMD1 (GDP-D-MANNOSE 4,6-DEHYDRATASE 1); GDP-mannose 4,6-dehydratase	-0.206205	-0.347083	-1.19026	-1.55727	-0.400306	-0.0584881	-0.183465	-0.57622	AT3G27150	kelch repeat-containing F-box family protein	-0.749233	-0.732629	-0.954547	-1.10259	-0.667541	-0.978804	-1.36242	-1.49626
AT5G66800	hypothetical protein	0.341415	0.66088	0.969369	0.953199	0.68052	0.317875	0.746916	0.0860643	AT3G27250	hypothetical protein	2.916	3.69488	4.29489	4.68705	4.74743	5.57293	5.81552	6.66003
AT5G67090	subtilase family protein	-0.161038	-0.312329	-0.593169	-1.20269	0.10873	0.0990685	-0.0679796	-0.458507	AT3G27400	pectate lyase family protein	1.68463	1.68859	1.8713	1.96074	0.358242	1.12115	1.72046	2.04251
AT5G67550	hypothetical protein	-0.273117	-0.2548	-0.686198	-1.25204	-0.378108	-0.129075	-0.453975	-0.649921	AT3G27500	protein binding / zinc ion binding	-0.558346	-0.690722	-1.58088	-1.77937	-0.589492	-0.648806	-0.62802	-1.0313
ATCG00120	zinc finger (C2H2 type) family protein	-1.56906	-0.721137	-1.21614	-0.379876	-1.60562	-1.61766	1.55248	-1.9485	AT3G27690	zinc finger (C2H2 type) family protein	-0.0902477	-0.942095	-1.22185	-1.90267	-0.761794	-0.53125	-0.772807	-0.48374
ATMG00400		0.714191	0.667991	1.09356	0.50812	0.338721	0.282979	0.155907	0.0631902	AT3G27920	NHO1 (NONHOST RESISTANCE TO P. S. PHASEOLICOLA 1); carbohydrate kinase	1.01244	0.802036	0.88012	0.435055	0.192446	0.945739	0.889584	1.04757
										AT3G27950	early nodule-specific protein, putative	-0.981187	-0.775234	-1.68221	-2.21473	-1.61159	-1.87731	-2.22879	-2.27652
										AT3G28007	nodulin MtN3 family protein	1.74356	1.95434	2.3096	2.16758	2.88274	2.82225	2.48326	2.64721
										AT3G28100	nodulin MtN21 family protein	0.446284	0.434986	0.751876	0.710892	0.416742	0.580223	0.258516	0.584506
										AT3G28220	meprin and TRAF homology domain-containing protein / MATH domain-containing protein	1.93042	2.27773	4.35825	4.18255	1.42189	2.2448	2.84799	2.701
										AT3G28270	hypothetical protein	2.42004	2.91227	5.15481	5.6106	5.17095	4.63624	5.45303	5.78864
										AT3G28290	AT14A	1.62858	1.4067	2.31301	2.40606	1.13609	1.88657	2.19854	1.91334
										AT3G28345	ABC transporter family protein	0.458687	0.809186	1.92617	3.12165	0.851894	1.96957	2.43198	3.33784
										AT3G28500	60S acidic ribosomal protein P2 (RPP2C)	-0.78875	-0.913161	-0.627157	-0.997901	-0.589649	-1.41562	-1.66451	-2.11704
										AT3G28650	DC1 domain-containing protein	-0.477103	-0.167473	-0.46181	-0.838487	-0.793757	-1.12259	-1.19087	-0.988302
										AT3G28840	hypothetical protein	0.94067	1.13136	1.40054	0.970874	0.409514	0.695483	0.55607	0.279392
										AT3G28880	protein binding	-1.00836	0.589382	-1.30438	-1.19778	-0.966995	-1.06542	0.0859591	-1.34233
										AT3G28899	hypothetical protein	-3.89725	-3.02238	-1.64356	-1.67997	-3.50297	-3.24665	-3.87241	-4.05559
										AT3G29110	terpene synthase/cyclase family protein	-3.05891	-2.00892	-2.78339	-4.04928	-2.29441	-3.21857	-2.87814	-3.62329
										AT3G29410	terpene synthase/cyclase family protein	-0.530444	-1.13255	-2.12245	-3.53455	-1.68762	-2.20114	-3.46748	-4.22796
										AT3G29430	geranylgeranyl pyrophosphate synthase, putative / GGPP synthetase, putative / farnesyltranstransferase, putative	-0.419589	-0.678011	-1.77018	-2.83691	-0.91818	-1.24098	-1.93814	-2.97422
										AT3G29575	hypothetical protein	0.515603	0.694427	1.37158	1.68212	1.51915	1.78778	1.78778	2.0706
										AT3G29590	AT5MAT; O-malonyltransferase/ transferase	1.74511	2.38675	3.40042	4.00831	1.6061	2.03417	2.97024	3.74279
										AT3G29725	pseudo	-0.0462323	0.0860373	0.0481303	-0.0619053	-0.0590104	-0.0525991	-0.0916825	-0.0489059
										AT3G30210	MYB121 (myb domain protein 121); DNA binding / transcription factor	3.5952	3.70198	3.96286	3.81126	3.29616	4.65249	3.85224	3.25027
										AT3G30260	MADS-box protein (AGL79)	-0.861391	-1.29043	-2.4215	-4.20429	-2.53082	-2.75188	-4.65546	-5.82445
										AT3G30530	ATBZIP42 (ARABIDOPSIS THALIANA BASIC LEUCINE-ZIPPER); DNA binding / protein heterodimerization/ protein homodimerization/ transcription factor	0.771375	0.509559	0.964298	0.603446	1.23722	1.49874	0.776944	0.470094
										AT3G30580	hypothetical protein	2.04036	1.36125	1.44765	1.48001	2.11485	2.24369	2.16639	1.93516
										AT3G30775	ERD5 (EARLY RESPONSIVE TO DEHYDRATION 5); proline dehydrogenase	-1.80581	-1.68406	-2.11129	-2.5233	-0.341404	-0.66221	-0.578162	-0.499757
										AT3G30875	pseudo	0.0495725	0.503474	1.28172	0.762329	0.801432	1.40919	1.95897	0.869151
										AT3G32030	terpene synthase/cyclase family protein	-0.0478312	-0.73321	-0.535559	-1.00377	-1.17563	-0.179294	-1.41453	-1.43866
										AT3G33025	pseudo	0.444024	-0.0236394	0.750644	-0.900659	-0.790837	-1.09202	0.251464	-0.457325
										AT3G43110	hypothetical protein	-0.241118	-0.684332	-1.14334	-1.59082	-0.477651	-0.332781	-0.654793	-0.974932
										AT3G43190	SUS4; UDP-glycosyltransferase/ sucrose synthase/ transferase, transferring glycosyl groups	-0.547073	-0.240135	-0.786949	-1.88698	-0.523124	-0.964994	-0.718159	-1.70004
										AT3G43890	DC1 domain-containing protein	-0.356316	-0.393127	-0.650689	-1.12573	-0.586769	-0.622712	-0.845005	-0.967126
										AT3G44200	ATNEK6/IBO1/NEK6 (NIMA (NEVER IN MITOSIS, GENE A)-RELATED 6); kinase	-0.212879	-0.306641	-0.635693	-0.753449	-0.0825859	-0.223337	-0.288286	-0.455693
										AT3G44290	ANAC060 (Arabidopsis NAC domain containing protein 60); transcription factor	0.484904	0.647758	1.51451	2.09643	1.42516	2.09234	2.57382	2.87324
										AT3G44350	ANAC061 (Arabidopsis NAC domain containing protein 61)	1.52285	2.13282	1.79689	0.675687	0.425878	1.82491	1.11244	1.25563
										AT3G44450	hypothetical protein	-0.187991	-0.598012	-0.561574	-0.520296	-1.01578	-1.40971	-1.32616	-1.1077
										AT3G44510	hypothetical protein	-0.260627	-0.645375	-1.03396	-1.50488	-0.549261	-0.174658	-0.623507	-0.674486
										AT3G44730	kinesin motor protein-related	0.0584191	0.0432215	-0.372582	-0.964209	-0.0040772	-0.0915646	-0.0626819	-0.0985229
										AT3G44735	PSK1 (PHYTOSULFOKINE 3 PRECURSOR); growth factor	0.46361	0.854752	1.23081	1.33687	1.0061	0.974901	1.1447	0.916426
										AT3G44840	S-adenosyl-L-methionine:carboxyl methyltransferase family protein	-0.558843	-0.615275	-0.661164	-0.888675	-0.44665	-1.17948	-1.32223	-1.56962
										AT3G44860	FAMT (FARNESOIC ACID CARBOXYL-O-METHYLTRANSFERASE); S-adenosylmethionine-dependent methyltransferase/ farnesoic acid O-methyltransferase	0.50494	0.563996	2.3832	1.82757	1.42117	1.79015	1.22304	2.73984
										AT3G44870	S-adenosyl-L-methionine:carboxyl methyltransferase family protein	0.185003	0.199091	2.14435	2.798	2.27467	2.106	1.28681	3.65628
										AT3G44900	ATCHX4 (CATION/H+ EXCHANGER 4); monovalent cation:proton antiporter	-0.8191	-0.999833	-2.26583	-2.42854	-0.804368	-0.606817	-0.409488	-0.288334
										AT3G44970	cytochrome P450 family protein	0.205142	0.299886	1.21989	1.38381	0.199364	0.709546	0.619365	1.09764
										AT3G45060	ATNRT2 (Arabidopsis thaliana high affinity nitrate transporter 2); nitrate transmembrane transporter	-0.379318	-0.69609	-1.34379	-1.25605	-2.73262	-3.50553	-2.94244	-2.69186
										AT3G45140	LOX2 (LIPOXYGENASE 2)	1.85861	2.01752	2.61797	2.59182	1.30207	1.57721	1.6109	1.83309
										AT3G45300	IVD (ISOVALERYL-COA-DEHYDROGENASE)	-2.37604	-2.48024	-3.2498	-2.90814	-1.53211	-1.80753	-2.12611	-2.65395
										AT3G45330	lectin protein kinase family protein	-0.596072	-0.794432	-0.765192	-1.41922	-0.412918	-0.555206	-0.856989	-0.945819
										AT3G45390	lectin protein kinase family protein	-0.281484	-0.434766	-0.447823	-0.941282	-0.581678	-0.547206	-0.97835	-1.07262
										AT3G45420	lectin protein kinase family protein	-0.445082	-0.580632	-1.15878	-1.28948	-0.521465	-0.46205	-0.400069	-0.240259
										AT3G45430	lectin protein kinase family protein	-0.43256	-0.630442	-1.13188	-1.68668	-0.65337	-0.579939	-0.895473	-0.685342
										AT3G45660	proton-dependent oligopeptide transport (POT) family protein	-0.487573	-0.468468	-0.618205	-0.38557	-1.11291	-0.78167	-1.06917	-0.763481
										AT3G45920	receptor protein kinase-related	-0.435839	-0.432615	0.63836	-0.396825	-0.424461	-0.311628	-0.430923	-0.43828
										AT3G46080	zinc finger (C2H2 type) family protein	0.180147	0.758466	1.40054	1.51288	0.375726	0.690543	0.229933	0.76803
										AT3G46240	protein kinase-related	-2.24955	-2.42988	-2.57481	-2.56836	-2.57321	-2.56848	-2.56802	-2.56893
										AT3G46330	MEE39 (maternal effect embryo arrest 39); kinase	-0.238216	-0.174775	-0.262595	-0.407358	-0.210043	-0.761496	-1.25305	-0.777399
										AT3G46340	leucine-rich repeat protein kinase, putative	-0.367187	-0.993295	-1.89325	-2.5184	-1.26067	-1.64761	-2.25176	-3.01978
										AT3G46370	leucine-rich repeat protein kinase, putative	-0.410725	-0.522706	-0.749162	-1.12411	-0.638457	-1.28623	-1.26996	-1.58762
										AT3G46780	PTAC16 (PLASTID TRANSCRIPTIONALLY ACTIVE18); binding / catalytic	0.0623584	-0.050124	-0.315223	-0.632852	0.0408539	0.12717	0.00842818	0.12383
										AT3G47110	leucine-rich repeat transmembrane protein kinase, putative	-0.98814	-0.882435	-0.659841	-1.42399	-0.384979	-0.794116	-0.852386	-1.05612
										AT3G47200	hypothetical protein	-0.582106	-0.576736	-0.55245	-0.770808	-0.781809	-0.874348	-1.18848	-1.21489
										AT3G47210	hypothetical protein	-0.456468	-0.593848	-0.745446	-1.14867	-0.85257	-0.523282	-1.05986	-0.953626
										AT3G47500	CDF3 (CYCLING DOF FACTOR 3); DNA binding / protein binding / transcription factor	-0.125813	-0.489189	-0.650339	-0.979561	-1.39679	-1.32279	-1.45426	-1.44319
										AT3G47510	hypothetical protein	-0.0376684	0.358328	0.441766	-0.0800062	0.11417	-0.0806691	0.0442556	-0.71741
										AT3G47675	hypothetical protein	-0.165666	-0.353379	-0.976542	-1.02957	-0.148043	-0.143078	-0.162771	-0.248299
										AT3G47710	bHLH family protein	-1.36086	-1.27311	-1.31835	-2.30896	-1.01233	-1.22706	-0.867107	-3.06204
										AT3G47720	SRO4 (SIMILAR TO RCD ONE 4); NAD+ ADP-ribosyltransferase	-0.38451	-1.16122	-2.19772	-4.83168	-1.1768	-0.427122	-0.600203	-2.19314
										AT3G47770	ATATH5 (ABC2 homolog 5); ATPase, coupled to transmembrane movement of substances	-0.383139	-0.766227	-1.58439	-2.25188	-0.742393	-0.423249	-0.961005	-0.949802
										AT3G48050	bromo-adjacent homology (BAH) domain-containing protein	-0.396992	-0.412121	-0.717809	-1.14931	-0.776238	-0.301822	-0.510044	-0.309105
										AT3G48290	CYP71A24 (cytochrome P450, family 71, subfamily A, polypeptide 24); oxygen binding	0.958988	0.624386	0.302502	0.251219	1.10605	1.14278	0.987635	1.69728
										AT3G48346	hypothetical protein	-0.64641	-2.53105	-2.21162	-2.59332	-0.839753	-1.10536	-1.24146	-1.638
										AT3G48350	cysteine proteinase, putative	0.579258	0.670138	1.13755	1.04202	1.03596	0.969119	0.846203	1.24843
										AT3G48510	hypothetical protein	0.927422	0.798963	0.755695	1.14943	1.15562	1.96725	2.23289	2.1557
										AT3G48520	CYP94B3 (cytochrome P450, family 94, subfamily B, polypeptide 3); oxygen binding	1.0005	0.260708	0.848662	1.48985	0.157689	1.4676	0.676069	1.50488
										AT3G48580	xyloglucan:xyloglucosyl transferase, putative / xyloglucan endotransglycosylase, putative / endo-xyloglucan transferase, putative	1.80805	1.75116	1.3825	0.833167	0.93551	1.13506	1.50835	1.73397
										AT3G48640	hypothetical protein	0.500876	1.53499	1.1578	0.956968	0.984789	1.61154	0.955221	1.16664
										AT3G48870	ATCLPC (CASEINOLYTIC PROTEASE C); ATP binding / ATPase	-0.140084	-0.259371	-0.658504	-0.837912	-0.514245	-0.274973	-0.188534	-0.236988
										AT3G48920	AtMYB45 (myb domain protein 45); DNA binding / transcription factor	1.65129	1.48333	1.95313	2.15223	0.999372	1.8438	1.74518	2.36316
										AT3G49110	ATPCA/ATPRX33/PRX33/PRXCA (PEROXIDASE 33); peroxidase	-0.501468	-1.2193	-1.05618	-1.46288	-1.46704	-1.26255	-1.32177	-1.36782
										AT3G49130	RNA binding	0.12344	0.678245	0.555282	1.273	-0.170214	-0.562278	0.601782	0.564405
										AT3G49300	proline-rich family protein	2.88652	3.75529	4.86457	4.93917	1.84984	2.10747	1.79526	2.28967
										AT3G49330	invertase/pectin methylesterase inhibitor family protein	-0.513459	-0.821022	-0.753435	-0.948362	0.248442	-0.110232	-0.562128	-0.888362
										AT3G49340	cysteine proteinase, putative	2.73363	0.874654	1.13242	1.72772	1.81859	4.25557	4.10703	4.76946
										AT3G49580	hypothetical protein	2.05892	1.86004	1.65611	2.89774	1.75868	1.83619	1.03034	2.12414
										AT3G49630	2-oxoacid-dependent oxidase, putative	-0.910193	-0.618235	-1.71814	-1.89763	-1.20132	-1.59137	-1.33652	-1.77782
										AT3G50010	DC1 domain-containing protein	-0.517722	-0.503499	-0.797316	-0.624668	-0.575984	-1.34219	-1.36988	-1.026
										AT3G50120	hypothetical protein	-0.136367	-0.623083	-0.952336	-1.37334	-0.603949	-0.35753	-1.18509	-1.01939
										AT3G50140	hypothetical protein	-0.480144	-0.813012	-1.46925	-1.96616	-0.505994	-0.170723	-0.513501	-0.860091
										AT3G50160	hypothetical protein	-2.59574	-3.01611	-4.02565	-4.20908	-3.51408	-4.06293	-4.79241	-5.72044
										AT3G50260	ATERF#011/CEJ1 (COOPERATIVELY REGULATED BY ETHYLENE AND JASMONATE 1); DNA binding / transcription factor	0.202369	0.399411	0.906714	1.02609	0.0762885	0.473527	0.29277	0.792798
										AT3G50300	transferase family protein	-1.15635	-1.25228	-1.36998	-1.55742	-0.752129	-0.644719	-0.726969	-0.827789
										AT3G50310	MAPKKK20 (Mitogen-activated protein kinase kinase kinase 20); kinase	-1.03091	-1.34949	-2.10619	-2.06599	-0.861351	-1.11372	-1.11431	-1.7001
										AT3G50350	hypothetical protein	-0.718312	-1.12975	-1.24308	-1.73911	-1.01584	-1.3239	-1.65995	-1.50642
										AT3G50370	hypothetical protein	-0.82751	-0.308564	-0.573866	-0.429496	-0.537506	-1.21288	-0.373674	-1.75628
										AT3G50440	hydrolase	1.0277	0.628966	1.0859	1.14825	1.14471	1.32396	1.17792	1.45535
										AT3G50560	short-chain dehydrogenase/reductase (SDR) family protein	-0.484342	-0.825549	-0.708503	-0.592166	-0.604526	-0.432002	-1.15177	-1.26493
										AT3G50590	transducin family protein / WD-40 repeat family protein	-0.355704	0.018963	0.0801332	0.263448	-0.197798	-0.47221	0.275351	-0.272851
										AT3G50760	GATL2 (Galacturonosyltransferase-like 2); polygalacturonate 4-alpha-galacturonosyltransferase/ transferase, transferring glycosyl groups / transferase, transferring hexosyl groups	0.418597	0.443756	0.796251	0.873654	0.553671	0.71484	0.915266	1.14814
										AT3G50890	ATHB28 (ARABIDOPSIS THALIANA HOMEOBOX PROTEIN 28); DNA binding / transcription factor	0.628876	0.747642	0.796102	0.863351	0.904766	0.787312	0.951675	1.41703
										AT3G50970	LTI30 (LOW TEMPERATURE-INDUCED 30)	0.471352	0.0853967	0.214494	0.569566	0.878231	1.0166	0.527398	0.835903
										AT3G51000	epoxide hydrolase, putative	0.386382	0.525469	0.840842	0.91837	0.687684	0.727422	0.629012	1.01027
										AT3G51120	zinc finger (CCCH-type) family protein	-0.015406	-0.080773	-0.23276	-0.0906563	0.208909	0.167647	0.0738376	0.410621
										AT3G51240	F3H (TRANSPARENT TESTA 6); naringenin 3-dioxygenase	-1.20515	-1.06362	-0.853133	-0.614822	-0.443197	-0.546792	-0.491802	-0.174991
										AT3G51350	aspartyl protease family protein	-0.422894	-0.836451	-1.21575	-1.39996	-0.881658	-0.849039	-1.28815	-0.905791
										AT3G51360	aspartyl protease family protein	-0.922426	-0.822158	-0.973943	-1.01034	-0.851376	-0.83289	-0.914146	-1.39714
										AT3G51400	hypothetical protein	-0.758966	-1.01404	-1.03707	-1.14544	-0.651256	-1.04127	-0.957318	-1.12968
										AT3G51410	hypothetical protein	-0.995345	-0.909049	-1.83753	-1.72731	-0.69832	-0.64986	-1.08102	-1.31737
										AT3G51680	short-chain dehydrogenase/reductase (SDR) family protein	-1.0894	-1.71602	-1.89693	-2.02706	-1.59802	-0.701961	-1.39745	-3.05185
										AT3G51810	ATEM1 (Early methionine labelled)	0.14754	-0.920808	-0.693387	0.0639646	-0.248988	-0.717389	0.319805	-0.668641
										AT3G51910	AT-HSFA7A (Arabidopsis thaliana heat shock transcription factor A7A); DNA binding / transcription factor	-0.378928	-0.930546	-1.42536	-1.9848	-0.663282	-0.238773	-0.71287	-0.689036
										AT3G52180	ATPTPKIS1/DSP4/SEX4 (STARCH-EXCESS 4); protein tyrosine/serine/threonine phosphatase	0.23517	0.309921	0.644686	0.730439	0.551545	0.57498	0.778247	1.09761
										AT3G52310	ABC transporter family protein	0.782232	1.11061	2.13997	2.31007	0.827166	0.989488	0.998344	0.620285
										AT3G53040	late embryogenesis abundant protein, putative / LEA protein, putative	1.73573	2.12156	1.6902	3.8275	2.15158	2.27126	3.37585	3.6841
										AT3G53200	AtMYB27 (myb domain protein 27); DNA binding / transcription factor	1.18996	1.07786	0.634896	1.35795	0.897731	1.81673	1.61219	2.20605
										AT3G53590	leucine-rich repeat transmembrane protein kinase, putative	-1.66028	-2.3378	-3.40582	-3.73449	-2.28813	-2.62118	-3.31919	-4.10882
										AT3G53680	PHD finger transcription factor, putative	-0.227054	-0.263773	-0.708715	-0.968043	-0.782828	-1.08381	-0.955225	-1.11149
										AT3G53980	protease inhibitor/seed storage/lipid transfer protein (LTP) family protein	0.479107	0.795116	0.940537	0.749545	1.50136	1.10805	1.46465	1.18348
										AT3G54020	phosphatidic acid phosphatase-related / PAP2-related	0.557838	0.76853	1.08851	1.14365	0.310624	0.094879	0.0377966	-0.0551878
										AT3G54200	hypothetical protein	0.188085	0.553076	1.12487	1.28641	0.358942	0.328448	0.235222	0.525738
										AT3G54450	transporter	-0.348452	-0.792478	-1.71998	-2.38887	-0.883432	-0.486608	-1.17164	-0.930039
										AT3G54770	RNA recognition motif (RRM)-containing protein	-0.482319	-0.601557	-1.41539	-1.64998	-0.320669	-0.335163	-0.338652	-1.01749
										AT3G54830	amino acid transporter family protein	-0.389728	-0.998532	-1.24786	-1.44643	-0.246405	-0.377515	-0.969385	-0.719479
										AT3G54940	cysteine proteinase, putative	0.22053	0.666087	0.634321	4.31152	2.98407	2.1709	2.70878	3.81938
										AT3G55020	RabGAP/TBC domain-containing protein	-0.0365198	-0.138582	-0.264715	0.0234414	0.0264725	-0.0439567	-0.316352	0.164059
										AT3G55110	ABC transporter family protein	0.694736	0.525604	0.945885	0.930297	0.479138	0.817275	0.606229	1.08238
										AT3G55130	ATWBC19 (WHITE-BROWN COMPLEX HOMOLOG 19); ATPase, coupled to transmembrane movement of substances	0.692924	0.365143	0.809539	0.663436	0.434271	1.13904	0.778702	1.21789
										AT3G55580	regulator of chromosome condensation (RCC1) family protein	-0.391094	-1.02649	-0.734192	-1.12053	-1.00432	-1.28261	-1.11784	-1.27685
										AT3G55720	hypothetical protein	-0.345909	-0.482257	-0.951728	-1.25699	-1.02977	-0.542821	-1.24243	-1.19464
										AT3G55840	hypothetical protein	0.162854	0.89976	1.17999	0.686242	0.756343	0.770296	0.328233	0.104442
										AT3G55870	anthranilate synthase, alpha subunit, putative	1.91244	2.07603	1.7707	2.42864	2.94027	2.9893	2.58121	3.32601
										AT3G55970	oxidoreductase, 2OG-Fe(II) oxygenase family protein	2.63278	3.00764	6.25907	5.53358	2.66872	3.1746	3.16171	3.83965
										AT3G56080	dehydration-responsive protein-related	0.53716	0.622327	1.08976	0.81318	0.708252	0.938815	1.03452	0.601735
										AT3G56160	bile acid:sodium symporter	-0.360933	-0.276905	-0.510633	-0.889208	-0.343742	-0.733087	-0.609612	-1.06757
										AT3G56260	hypothetical protein	1.07975	0.309526	0.919475	1.2477	0.347947	0.276132	0.0245692	0.663567
										AT3G56275	pseudo	1.6999	1.72574	2.3998	2.49033	3.73578	4.00009	4.13273	3.91705
										AT3G56410	hypothetical protein	-0.0478552	0.00992823	-0.0415919	-0.0455021	-0.0370439	-0.036102	-0.025873	-0.038455
										AT3G56500	serine-rich protein-related	-0.148729	-0.142299	-0.306208	-0.956839	-0.798995	-0.450198	-0.472156	-1.26495
										AT3G56590	hydroxyproline-rich glycoprotein family protein	0.0340578	-0.0315985	-0.189577	-0.146698	0.245998	0.127607	0.122176	-0.204474
										AT3G57260	BGL2 (PATHOGENESIS-RELATED PROTEIN 2); glucan 1,3-beta-glucosidase/ hydrolase, hydrolyzing O-glycosyl compounds	2.40528	2.8292	2.9777	1.97127	0.595668	3.77827	2.92994	3.99276
										AT3G57450	hypothetical protein	0.129157	0.667729	0.948551	1.15564	0.572341	0.406891	0.45927	0.262763
										AT3G57460	catalytic/ metal ion binding / metalloendopeptidase/ zinc ion binding	0.428845	0.272313	0.600819	2.69788	2.59454	1.80005	1.54584	3.01887
										AT3G57700	protein kinase, putative	0.443507	0.555967	1.052	1.04659	0.299613	0.774051	0.347689	0.542255
										AT3G57760	protein kinase family protein	0.258678	0.680337	1.30824	1.36707	0.219755	0.346811	0.159319	0.222943
										AT3G58150	hypothetical protein	0.659201	0.873269	1.68402	1.91075	0.803824	0.584953	0.756899	1.11963
										AT3G58270	meprin and TRAF homology domain-containing protein / MATH domain-containing protein	0.362047	0.469611	0.945209	1.19424	0.453921	0.181839	0.189353	0.442258
										AT3G58540	hypothetical protein	0.86481	0.975313	1.33375	1.42615	0.672318	0.785469	0.923663	0.598517
										AT3G59020	protein transporter	-0.248212	0.188354	0.335672	0.456564	0.293136	-0.0814444	0.671912	-0.11719
										AT3G59220	PRN (PIRIN); calmodulin binding	0.294423	0.33641	0.537408	0.84165	0.267141	0.441923	0.524393	1.01404
										AT3G59270	syntaxin-related family protein	1.53147	1.71252	2.04998	2.24319	0.793614	2.31119	3.02009	3.24696
										AT3G59370	hypothetical protein	-0.490451	-0.900173	-1.36263	-2.06423	-0.410883	-0.155999	-0.538567	-1.05336
										AT3G59440	calcium-binding protein, putative	0.158349	0.6239	0.874571	2.51912	2.20949	1.00514	1.00081	1.90955
										AT3G59480	pfkB-type carbohydrate kinase family protein	-1.19627	-1.49351	-2.0861	-2.63115	-0.705537	-0.871297	-0.880334	-0.96453
										AT3G59680	hypothetical protein	-0.252163	-0.17271	-0.530729	-1.01118	-0.479948	-0.394173	-0.179698	-0.692992
										AT3G60090	VQ motif-containing protein	1.97658	1.78452	2.89265	3.3791	1.85794	3.02441	2.12582	3.14689
										AT3G60270	uclacyanin, putative	-1.76839	-2.2937	-3.21698	-4.24895	-3.83233	-4.09262	-3.79373	-3.95599
										AT3G60290	oxidoreductase, acting on paired donors, with incorporation or reduction of molecular oxygen, 2-oxoglutarate as one donor, and incorporation of one atom each of oxygen into both donors	1.34308	1.3721	1.65094	1.66478	0.329935	1.16202	1.2606	1.6148
										AT3G60420	hypothetical protein	-0.0649198	0.749397	2.76896	2.54756	2.33216	-0.116845	2.54367	1.66934
										AT3G60490	AP2 domain-containing transcription factor TINY, putative	-0.446396	-0.786237	-0.72941	-1.10752	-0.481074	-0.206091	-0.61533	-0.768438
										AT3G60550	CYCP3;2 (cyclin p3;2); cyclin-dependent protein kinase	-0.688847	-0.857281	-1.06983	-1.02871	-0.190317	-0.724174	-0.853913	-1.32395
										AT3G60670	zinc-binding protein, putative	0.716947	1.09612	1.39753	1.34172	0.653741	0.897085	1.13881	1.04736
										AT3G60750	transketolase, putative	0.110935	0.0943582	-0.0195688	-0.180174	0.0532346	0.117822	0.0701278	0.0508482
										AT3G60870	DNA-binding protein-related	-0.929296	-0.565674	-1.76609	-2.28045	-0.618246	-0.570667	-0.274763	-0.815138
										AT3G60890	ZPR2 (LITTLE ZIPPER 2)	-0.22947	-0.323359	-0.352076	-1.00834	-0.548158	-0.848093	-1.13494	-1.20815
										AT3G60961	ATP binding / nucleobase, nucleoside, nucleotide kinase	0.570667	0.50096	0.866074	1.01887	0.551915	0.706857	0.43597	0.745639
										AT3G61390	U-box domain-containing protein	0.99586	0.584318	0.897996	0.351407	1.23163	1.87798	1.56715	1.08052
										AT3G61400	2-oxoglutarate-dependent dioxygenase, putative	-2.73298	-3.08897	-3.59411	-3.37833	-1.86761	-1.80992	-1.93763	-2.12415
										AT3G61450	SYP73 (SYNTAXIN OF PLANTS 73)	0.390208	0.449309	0.760711	0.378949	0.834286	1.03047	1.02341	0.976171
										AT3G61480	hypothetical protein	-0.21265	-0.154818	-0.354461	-1.02032	-0.604051	-0.364387	-0.464226	-0.78775
										AT3G61530	PANB2; 3-methyl-2-oxobutanoate hydroxymethyltransferase	0.555487	0.397454	0.548982	0.779891	0.633073	0.7317	0.655901	1.08796
										AT3G61670	hypothetical protein	-0.332059	-0.197276	-0.394525	-0.978101	-1.06893	-0.564087	-0.557878	-0.650888
										AT3G61680	lipase class 3 family protein	-0.291144	-0.356671	-0.735124	-1.20662	-0.384298	-0.300391	-0.539568	-0.638698
										AT3G61840	hypothetical protein	-0.127919	-0.473152	-0.573239	-1.17974	-0.23131	-0.639165	-1.13135	-0.940091
										AT3G61920	hypothetical protein	0.988825	1.40557	1.52096	1.41344	1.84487	1.50322	1.66189	1.61582
										AT3G62070	hypothetical protein	1.34577	1.61339	1.65389	1.43564	0.937644	0.591668	0.557516	0.408356
										AT3G62150	PGP21 (P-GLYCOPROTEIN 21); ATPase, coupled to transmembrane movement of substances	-0.881097	-1.03164	-1.08527	-0.755936	-0.847304	-1.63665	-1.55006	-1.54435
										AT3G62210	EDA32 (embryo sac development arrest 32)	-1.4785	-1.44606	-2.09356	-3.07386	-1.85489	-2.26293	-2.60184	-2.90331
										AT3G62730	hypothetical protein	0.873998	0.791493	1.4143	1.4842	1.68765	1.12868	1.17128	1.82793
										AT3G62760	ATGSTF13 (Arabidopsis thaliana Glutathione S-transferase (class phi) 13); glutathione transferase	-1.0571	-1.02463	-2.4933	-3.30422	-0.732732	-0.182737	-0.179278	-0.639864
										AT3G62990	hypothetical protein	0.547198	0.814531	1.98733	2.2145	2.41408	2.35959	2.02375	2.0125
										AT3G63060	EDL3 (EID1-LIKE 3)	1.05501	0.988385	1.17048	1.63742	0.266861	0.862482	0.631911	1.21989
										AT3G63200	PLA IIIB/PLP9 (Patatin-like protein 9); nutrient reservoir	-0.476193	-0.343034	-0.899525	-1.25145	-1.17645	-0.688102	-0.471543	-0.754448
										AT3G63280	ATNEK4; kinase	-0.418383	-0.49476	-0.888043	-1.34182	-0.332885	-0.609678	-0.746209	-1.09334
										AT3G63440	ATCKX6/ATCKX7/CKX6 (CYTOKININ OXIDASE/DEHYDROGENASE 6); cytokinin dehydrogenase	-0.348838	-0.549564	-1.16434	-1.74722	-0.105727	-0.333838	-0.593357	-0.701979
										AT4G00080	UNE11 (unfertilized embryo sac 11); pectinesterase inhibitor	-0.960698	-0.865449	-1.55373	-1.87048	-0.989195	-0.697546	-0.710944	-0.829037
										AT4G00160	F-box family protein	-0.405998	-0.427563	-0.402053	-0.408094	-0.407945	-0.472541	-0.431341	-0.413954
										AT4G00230	XSP1 (XYLEM SERINE PEPTIDASE 1); subtilase	-0.721736	-0.854584	-1.6044	-2.02425	-1.04553	-0.44722	-0.999142	-0.612393
										AT4G00430	TMP-C (PLASMA MEMBRANE INTRINSIC PROTEIN 1;4); water channel	0.0482021	0.0158052	0.0427032	0.613241	0.284268	0.42306	0.0649945	0.768297
										AT4G00490	BAM2/BMY9 (BETA-AMYLASE 2); beta-amylase	0.699804	0.478003	0.536082	0.6339	0.383904	0.766038	0.370639	1.01305
										AT4G00670	DNA binding	-0.790751	-0.691819	-0.899664	-1.31858	-0.602589	-0.946799	-1.20513	-1.412
										AT4G00680	actin-depolymerizing factor, putative	-0.0875732	-0.530036	-0.87921	-1.46865	-0.290987	-0.118577	-0.748607	-0.782149
										AT4G00720	shaggy-related protein kinase theta / ASK-theta (ASK8)	-0.607032	-0.183322	-0.168276	-0.389449	-0.259314	-0.65885	-0.0751451	-1.21166
										AT4G00770	hypothetical protein	-1.09184	-0.851336	-1.39147	-1.37875	-0.571119	-0.403908	-0.349514	-0.710081
										AT4G01080	hypothetical protein	0.986193	1.03484	2.09572	2.04231	1.09892	1.34002	1.43914	1.76684
										AT4G01290	hypothetical protein	-0.181087	0.0581235	-0.0808936	-0.240045	-0.824145	-0.47761	-0.0949059	-0.706953
										AT4G01360	hypothetical protein	0.600547	0.482919	0.943403	0.996735	0.317776	0.87819	0.675201	1.1356
										AT4G01500	NGA4 (NGATHA4); transcription factor	0.517016	0.490443	0.848793	0.974727	0.182364	0.797072	1.11768	1.60505
										AT4G01700	chitinase, putative	-0.762037	-0.743789	-1.09434	-0.934654	-1.09868	-1.03267	-1.26115	-1.22861
										AT4G01760	DC1 domain-containing protein	-1.51705	-0.731488	-1.49719	-1.88812	-0.805182	-1.19105	-0.31233	-3.47394
										AT4G01770	RGXT1 (RHAMNOGALACTURONAN XYLOSYLTRANSFERASE 1); UDP-xylosyltransferase	-0.246995	-0.263837	-1.38586	-1.35678	-0.516248	-0.481101	-0.467836	-0.788724
										AT4G01970	ATSTS (ARABIDOPSIS THALIANA STACHYOSE SYNTHASE); galactinol-raffinose galactosyltransferase/ hydrolase, hydrolyzing O-glycosyl compounds	-1.03623	-0.980843	-2.60088	-2.58693	-1.964	-1.98483	-2.45158	-2.60248
										AT4G01985	hypothetical protein	0.856616	1.61327	3.66085	5.84107	5.92796	4.95049	5.25774	6.35946
										AT4G02160	hypothetical protein	1.14159	1.29403	1.20198	1.31782	1.48246	1.5807	1.7501	1.15251
										AT4G02170	hypothetical protein	0.646539	1.20986	1.84373	1.47418	2.01018	1.88484	1.65438	1.13723
										AT4G02270	pollen Ole e 1 allergen and extensin family protein	-0.211837	-0.537849	-0.956654	-1.47536	-0.305949	-0.492569	-1.04022	-1.30254
										AT4G02280	SUS3; UDP-glycosyltransferase/ sucrose synthase/ transferase, transferring glycosyl groups	0.686644	0.761139	1.62265	2.33645	1.61317	2.15231	2.06366	2.33206
										AT4G02290	ATGH9B13 (ARABIDOPSIS THALIANA GLYCOSYL HYDROLASE 9B13); hydrolase, hydrolyzing O-glycosyl compounds	-0.131752	-0.197211	-0.808395	-1.83176	-0.231437	-0.499274	-0.685524	-1.24892
										AT4G02330	ATPMEPCRB; pectinesterase	1.25634	2.94669	3.82698	4.05509	1.71846	1.93358	2.27936	2.6043
										AT4G02360	hypothetical protein	0.478782	0.713464	1.90116	2.30061	1.74388	1.70309	1.99303	2.09762
										AT4G02670	ATIDD12 (ARABIDOPSIS THALIANA INDETERMINATE(ID)-DOMAIN 12); nucleic acid binding / transcription factor/ zinc ion binding	0.771675	0.774008	1.10517	1.19912	0.401394	0.537508	0.691027	0.836068
										AT4G02810	hypothetical protein	0.339429	0.519962	0.500367	0.333363	1.13668	1.31559	1.1859	1.4561
										AT4G02850	phenazine biosynthesis PhzC/PhzF family protein	0.695828	0.621778	0.978411	0.932496	0.119307	0.586475	0.748182	0.906495
										AT4G03060	AOP2 (ALKENYL HYDROXALKYL PRODUCING 2); oxidoreductase, acting on paired donors, with incorporation or reduction of molecular oxygen, 2-oxoglutarate as one donor, and incorporation of one atom each of oxygen into both donors	0.318883	0.399645	0.589315	0.593028	0.668683	0.793988	0.995219	1.71188
										AT4G03420	hypothetical protein	0.220772	0.219795	0.666896	0.808513	0.246049	0.422599	0.377251	0.454071
										AT4G03510	RMA1 (Ring finger protein with Membrane Anchor 1); protein binding / ubiquitin-protein ligase/ zinc ion binding	-0.589754	-0.94232	-1.17128	-1.39458	-0.537804	-0.771508	-1.16459	-1.17485
										AT4G03926	pseudo	-0.651704	-0.490524	-0.901971	-1.06833	-0.450931	-0.924154	-0.834559	-0.869284
										AT4G04745	hypothetical protein	0.836606	0.908428	1.51811	1.86695	1.2818	1.59834	1.58359	1.89647
										AT4G04770	ATABC1 (ARABIDOPSIS THALIANA NUCLEOSOME ASSEMBLY PROTEIN 1)	-0.273397	-0.725779	-0.616933	-0.944775	-0.224582	0.00921012	-0.199979	0.0227115
										AT4G04810	methionine sulfoxide reductase domain-containing protein / SeIR domain-containing protein	0.0841776	0.370115	0.847098	1.01273	0.606053	0.549524	0.476624	0.636652
										AT4G04840	methionine sulfoxide reductase domain-containing protein / SeIR domain-containing protein	-0.489506	-0.444057	-0.330776	-0.296221	-0.47448	-0.911417	-1.17942	-1.10324
										AT4G04955	ATALN (ARABIDOPSIS ALLANTOINASE); allantoinase/ hydrolase	-0.551739	-1.08673	-1.50332	-1.36272	-0.185997	-0.387236	-0.385709	-0.228346
										AT4G06744	leucine-rich repeat family protein / extensin family protein	-0.585745	-0.555445	-0.77206	-1.11222	-0.300713	-0.425131	-0.620754	-0.387249
										AT4G06746	RAP2 (related to AP2 9); transcription factor	-0.693573	-0.804638	-1.42534	-1.3463	-1.35641	-1.22407	-1.36799	-0.728482
										AT4G08140	hypothetical protein	-0.270105	-0.196352	-0.525738	-1.02069	-1.239	-0.475834	-0.618773	-0.425009
										AT4G08160	glycosyl hydrolase family 10 protein / carbohydrate-binding domain-containing protein	-0.579647	-0.928046	-1.46588	-2.07077	-0.317495	-0.40129	-0.705455	-0.64576
										AT4G08300	nodulin MtN21 family protein	-0.62582	-1.11494	-1.52005	-2.03716	-2.09578	-1.79737	-2.69803	-2.81649
										AT4G08770	peroxidase, putative	-1.06203	-0.924764	-1.53951	-1.38375	-1.2345	-1.93872	-2.17651	-1.95532
										AT4G08780	peroxidase, putative	-0.594207	-0.797137	-1.05913	-1.93393	-1.13716	-1.45673	-1.26935	-1.30743
										AT4G08870	arginase, putative	0.438325	0.915257	2.5017	2.40696	0.839334	0.351759	0.152318	0.752047
										AT4G09080	ATTOC75-IV/TOC75-IV (TRANSLOCON OUTER MEMBRANE COMPLEX 75-IV)	0.334346	0.289391	0.24952	1.20966	0.663663	0.477573	0.66348	0.801681
										AT4G09100	zinc finger (C3HC4-type RING finger) family protein	-0.490757	-1.02833	-1.58194	-2.16063	-0.827258	-0.691489	-1.37177	-1.57366
										AT4G09300	hypothetical protein	0.178953	0.570801	0.656284	0.850674	0.269312	0.443359	0.815876	1.13657
										AT4G09780	meprin and TRAF homology domain-containing protein / MATH domain-containing protein	2.02037	2.3413	3.31757	3.75368	1.52211	2.3958	2.99981	3.56165
										AT4G09820	TT8 (TRANSPARENT TESTA 8); DNA binding / transcription factor	1.48606	2.03849	3.38244	3.76126	1.38136	1.89234	2.62329	3.25415
										AT4G09960	STK (SEEDSTICK); transcription factor	1.15695	1.13867	1.26805	1.29981	1.24937	1.93718	1.72826	1.38294
										AT4G10350	ANAC070 (Arabidopsis NAC domain containing protein 70); transcription factor	-0.488177	-0.572329	-1.3442	-1.46392	-0.660067	-0.227552	-0.210373	-0.386504
										AT4G10550	subtilase family protein	-0.763837	-1.07478	-1.36581	-1.40866	-1.1358	-1.10707	-1.31069	-0.936475
										AT4G10600	PHD finger family protein	-0.225955	-0.31866	-0.428987	-1.02348	-0.615361	-0.55139	-0.647012	-0.898655
										AT4G10850	nodulin MtN3 family protein	0.936383	0.687253	0.362885	-0.341651	0.943775	0.737344	0.670411	1.26521
										AT4G10960	UGE5 (UDP-D-GLUCOSE/UDP-D-GALACTOSE 4-EPIMERASE 5); UDP-glucose 4-epimerase/ protein dimerization	0.393355	0.23182	0.643479	1.03699	0.481491	0.799288	0.52164	0.957349
										AT4G11050	ATGH9C3 (ARABIDOPSIS THALIANA GLYCOSYL HYDROLASE 9C3); hydrolase, hydrolyzing O-glycosyl compounds	-0.444198	-0.290362	-1.06307	-1.21559	-0.445032	-0.322966	-0.389602	-0.443263
										AT4G11190	disease resistance-responsive family protein / dirigent family protein	0.817995	0.184031	1.22527	1.82825	0.848336	1.99339	1.82182	2.18745
										AT4G11230	respiratory burst oxidase, putative / NADPH oxidase, putative	-0.544079	-0.62613	-0.934358	-1.07666	-0.639518	-0.683855	-0.986946	-1.04982
										AT4G11290	peroxidase, putative	-0.79795	-0.442621	-0.485326	-0.453162	-0.696644	-1.09541	-1.09057	-0.525788
										AT4G11350	transferase, transferring glycosyl groups	0.207183	0.531791	0.923547	1.2521	0.169846	0.45251	0.628718	0.504143
										AT4G11460	protein kinase family protein	-1.56147	-3.03802	-3.35588	-2.9361	-2.36334	-2.55668	-2.74776	-2.69604
										AT4G11610	C2 domain-containing protein	-0.599972	-0.271773	-1.37644	-1.37928	-0.468514	-0.800484	-0.242379	-1.44043
										AT4G11780	hypothetical protein	-0.668668	-0.666771	-1.67461	-2.09177	-0.663172	-0.559438	-0.560107	-1.08827
										AT4G11880	AGL14 (AGAMOUS-LIKE 14); DNA binding / transcription factor	-0.944878	-1.2718	-2.1769	-3.28253	-0.863223	-1.07523	-1.51589	-3.01171
										AT4G11890	protein kinase family protein	0.895228	1.10766	1.34679	0.596876	0.716734	1.91491	1.22339	1.4945
										AT4G12000	hypothetical protein	0.571835	0.698947	1.19621	0.997156	-0.0827945	0.29995	0.152683	-0.0585333
										AT4G12300	CYP706A4 (cytochrome P450, family 706, subfamily A, polypeptide 4); oxygen binding	0.484753	0.159633	0.576841	1.18167	0.813518	0.757419	0.559801	1.12416
										AT4G12330	CYP706A7 (cytochrome P450, family 706, subfamily A, polypeptide 7); oxygen binding	0.640053	0.916925	1.49283	0.975852	0.350586	1.1551	1.04076	1.21074
										AT4G12400	stress-inducible protein, putative	-0.850598	-0.737073	-0.983023	-1.20282	-0.00348585	-0.314367	-0.212949	-0.214262
										AT4G12410	auxin-responsive family protein	0.535133	0.356558	0.418844	0.272214	1.04522	1.26662	1.48509	1.13964
										AT4G12470	protease inhibitor/seed storage/lipid transfer protein (LTP) family protein	1.53227	1.67584	2.1679	2.38453	0.727466	1.18137	1.37333	1.79402
										AT4G12480	pEARLI 1; lipid binding	1.75542	2.30707	2.80234	3.16474	1.03435	1.71812	1.79843	2.51195
										AT4G12490	protease inhibitor/seed storage/lipid transfer protein (LTP) family protein	2.10695	3.30295	3.62729	4.87029	0.801013	1.68737	1.69735	2.86657
										AT4G12500	protease inhibitor/seed storage/lipid transfer protein (LTP) family protein	1.53613	2.24261	2.55343	3.06295	1.04945	1.79622	1.79398	2.75813
										AT4G12730	FLA2	-0.676607	-0.743786	-0.901982	-1.20557	-0.898602	-1.0791	-1.344	-1.70461
										AT4G12890	gamma interferon responsive lysosomal thiol reductase family protein / GILT family protein	1.16517	1.0592	1.81021	2.00016	0.801085	1.05932	0.939791	1.27321
										AT4G13130	DC1 domain-containing protein	-0.888503	-0.984519	-1.32352	-1.3302	-0.511959	-0.511456	-0.997803	-0.720617
										AT4G13410	ATCSLA15 (Cellulose synthase-like A15); transferase, transferring glycosyl groups	-0.685845	-1.22924	-0.490369	-0.754557	-1.57513	-0.849561	-1.11456	-1.31198
										AT4G13420	HAK5 (High affinity K+ transporter 5); potassium ion transmembrane transporter	3.68194	4.1221	4.67911	4.80582	1.55545	4.02631	3.41999	4.59652
										AT4G13480	AtMYB79 (myb domain protein 79); DNA binding / transcription factor	1.55342	1.72913	2.88234	3.28281	1.03639	1.51616	1.5504	1.72013
										AT4G13495	miscRNA	-0.223803	-0.672659	-0.996208	-1.04484	-0.563807	-0.151188	-0.125718	-0.151193
										AT4G13600	glycosyl hydrolase family protein 17	-0.212716	-0.306673	-0.757005	-1.1026	-0.370535	-0.504733	-0.458632	-0.581
										AT4G13790	auxin-responsive protein, putative	0.296521	0.645018	0.901997	1.13584	1.71022	1.71321	1.93322	2.00981
										AT4G14020	rapid alkalinization factor (RALF) family protein	0.77122	0.883514	0.852003	0.829906	1.88072	1.68036	1.46944	1.44135
										AT4G14090	UDP-glucoronosyl/UDP-glucosyl transferase family protein	1.45398	1.92432	3.24227	3.58947	1.60713	1.86535	2.60629	3.34215
										AT4G14130	XTR7 (XYLOGLUCAN ENDOTRANSGLYCOSYLASE 7); hydrolase, acting on glycosyl bonds	-1.05605	-1.36633	-1.83447	-2.39942	0.340237	-0.321548	-0.912067	-0.829085
										AT4G14250	UBX domain-containing protein	1.558	1.75259	2.52933	5.33742	3.61042	4.07809	4.07544	6.3308
										AT4G14360	dehydration-responsive protein-related	0.128744	0.172874	0.0639745	-0.0172299	-0.126079	-0.063257	-0.147071	-0.00286001
										AT4G14690	ELIP2 (EARLY LIGHT-INDUCIBLE PROTEIN 2); chlorophyll binding	-1.27029	-0.917333	-0.989581	-0.52411	-1.14306	-1.61959	-1.06052	-1.02602
										AT4G14746	hypothetical protein	0.118268	0.34189	1.15846	1.34696	0.350833	0.730599	0.554834	0.83592
										AT4G14980	DC1 domain-containing protein	-0.286077	-0.330603	-1.02768	-1.49036	-0.282401	-0.456214	-0.27889	-0.725165
										AT4G15075	hypothetical protein	1.52678	1.60208	1.76339	1.99527	1.4665	1.51164	1.3479	1.33096
										AT4G15360	CYP705A3 (cytochrome P450, family 705, subfamily A, polypeptide 3); oxygen binding	-0.558038	-0.416	-0.878047	-1.02417	-0.974512	-0.803011	-1.06914	-0.848948
										AT4G15390	transferase family protein	-0.371653	-0.275452	-0.121885	-0.700364	-1.05976	-0.898371	-0.947185	-1.255
										AT4G15393	CYP702A5 (cytochrome P450, family 702, subfamily A, polypeptide 5); heme binding / iron ion binding / monooxygenase	-0.248623	-0.54768	-0.387969	-0.21334	-1.26777	-0.896725	-1.15642	-0.795832
										AT4G15396	CYP702A6 (cytochrome P450, family 702, subfamily A, polypeptide 6); heme binding / iron ion binding / monooxygenase	-0.527254	-1.20628	-0.966637	-1.05754	-0.381414	-0.561882	-1.17693	-0.5886
										AT4G15400	transferase family protein	-0.212807	-0.219251	-0.382494	-0.770291	-0.662532	-0.775733	-1.25201	-1.083
										AT4G15430	hypothetical protein	-0.0292626	-0.173448	-0.453213	-0.989064	-0.944461	-0.601966	-0.795628	-0.965385
										AT4G15440	HPL1 (HYDROPEROXIDE LYASE 1); heme binding / iron ion binding / monooxygenase	2.69565	2.90962	4.38185	4.08393	1.09231	1.8783	2.20111	1.56162
										AT4G15480	UGT84A1; UDP-glycosyltransferase/ sinapate 1-glucosyltransferase/ transferase, transferring glycosyl groups	-2.6824	-2.14016	-1.86044	-2.18463	-0.926172	-1.76839	-1.6989	-1.61798
										AT4G15630	integral membrane family protein	0.377108	0.317727	0.614059	1.09327	0.680344	0.478788	0.439819	0.833844
										AT4G15740	C2 domain-containing protein	-0.796103	-1.33552	-1.726	-2.76757	-1.19539	-1.08924	-2.04473	-2.06346
										AT4G15990	hypothetical protein	-1.7134	-2.89243	-3.5046	-4.03521	-1.12101	-0.772127	-1.21019	-1.3231
										AT4G16215	hypothetical protein	-0.931452	-0.411702	-0.881951	-1.08929	-0.910293	-0.918614	-0.712126	-0.309526
										AT4G16260	glycosyl hydrolase family 17 protein	-1.10683	-0.971875	-1.32268	-1.58083	-0.255164	-0.607599	-0.763606	-0.0467299
										AT4G16270	peroxidase 40 (PER40) (P40)	-0.614834	-0.798162	-1.20298	-1.29622	-0.44066	-0.194344	-0.41556	-0.581948
										AT4G16400	hypothetical protein	-0.35813	-0.838598	-1.34088	-1.83985	-0.819086	-0.62856	-1.27254	-1.13846
										AT4G16515	hypothetical protein	0.814288	0.742829	1.10601	1.03468	0.288979	0.551238	0.138625	0.451756
										AT4G16590	ATCSLA01 (Cellulose synthase-like A1); glucosyltransferase/ transferase, transferring glycosyl groups	4.20828	5.87556	9.50135	9.53227	5.56313	5.43212	5.75734	4.51229
										AT4G16620	integral membrane family protein / nodulin MtN21-related	-1.27031	-0.687139	-0.346857	-0.331085	-0.261014	-1.7674	-1.0466	-3.23521
										AT4G16740	ATTPS03 (Arabidopsis thaliana terpene synthase 03)	-2.74367	-2.20862	-4.54541	-4.30079	-0.484458	-2.91559	-3.3382	-3.24513
										AT4G16860	RPP4 (RECOGNITION OF PERONOSPORA PARASITICA 4)	-0.745512	-0.655588	-0.718091	-0.803109	-0.914679	-1.03674	-1.15737	-1.61297
										AT4G16880	disease resistance protein-related	-0.744096	-1.11047	-1.22236	-1.3534	-0.698408	-1.43516	-1.6707	-2.10331
										AT4G16950	RPP5 (RECOGNITION OF PERONOSPORA PARASITICA 5)	-0.224394	-0.135826	-0.167275	-0.121081	-0.157006	-0.281457	-0.264098	-0.391636
										AT4G17245	zinc finger (C3HC4-type RING finger) family protein	-0.958101	-0.878825	-0.637284	-0.756296	-0.857805	-1.29278	-0.975936	-2.21404
										AT4G17470	palmitoyl protein thioesterase family protein	1.09227	1.70167	2.80449	2.61769	1.76449	1.2101	1.54056	1.59698
										AT4G17480	palmitoyl protein thioesterase family protein	0.580106	0.795556	1.26949	1.06968	0.766542	0.492084	0.505977	0.745392
										AT4G17550	transporter-related	0.366272	0.247385	0.345869	0.661385	0.672952	0.65214	0.565931	1.00132
										AT4G17660	protein kinase, putative	-0.0710134	-0.177982	0.306015	2.31234	2.17019	1.25933	0.750473	1.94845
										AT4G17860	hypothetical protein	-0.212768	-0.800912	-1.06421	-2.02945	-0.504482	-1.76405	-2.06646	-3.44006
										AT4G18010	IP5PII (INOSITOL POLYPHOSPHATE 5-PHOSPHATASE II); inositol-polyphosphate 5-phosphatase	-1.38077	-0.624201	-0.326091	-0.34253	-0.906187	-1.11536	-0.76056	-1.34592
										AT4G18205	AT4G18200	-0.5095	-0.732072	-0.550287	-0.619522	-0.783316	-0.978008	-1.08078	-0.784441
										AT4G18210	ATPUP10 (Arabidopsis thaliana purine permease 10); purine transmembrane transporter	-0.089369	0.0078115	0.507304	0.619963	0.281441	0.350248	0.206189	0.325225
										AT4G18250	receptor serine/threonine kinase, putative	-0.74905	-1.04398	-0.88022	-1.12476	-1.80404	-0.779027	-0.621138	-0.533845
										AT4G18280	glycine-rich cell wall protein-related	1.04587	1.4131	2.1542	2.92726	0.876965	0.760641	0.789872	0.812112
										AT4G18340	glycosyl hydrolase family 17 protein	-0.697509	-1.00485	-1.09772	-1.46333	-0.692232	-0.654531	-0.918376	-0.792864
										AT4G18510	CLE2 (CLAVATA3/ESR-RELATED); receptor binding	-0.977903	-1.40344	-1.75766	-1.99892	-0.716407	-0.293348	-0.96121	-1.44701
										AT4G18630	hypothetical protein	0.651518	0.670187	0.550275	0.595285	0.429472	0.601221	0.806519	1.23453
										AT4G18830	ATOFP5/OFP5 (ARABIDOPSIS THALIANA OVATE FAMILY PROTEIN 5)	0.609479	0.168556	0.420535	0.531971	1.14422	0.88693	0.864105	0.843865
										AT4G18910	NIP1;2/NLM2 (NOD26-like intrinsic protein 1;2); water channel	0.66972	0.622918	0.814169	1.16678	0.526244	0.844023	0.883162	1.36997
										AT4G18960	AG (AGAMOUS); transcription factor	-0.481021	-0.989567	-2.32832	-1.05712	-1.19638	-0.758851	-1.13755	-0.449456
										AT4G19030	NLM1 (NOD26-like intrinsic protein 1;1); water channel	-0.631265	-0.911382	-1.07257	-0.790791	-0.777103	-0.590515	-0.977718	-0.726418
										AT4G19110	protein kinase, putative	-0.934307	-0.222968	-0.212563	0.0176191	-0.529141	-1.00656	0.287721	-1.3351
										AT4G19390	hypothetical protein	0.259026	0.201911	0.461935	0.95839	0.942486	0.6449	0.866268	1.03378
										AT4G19430	hypothetical protein	-3.3868	-4.12472	-3.95256	-4.77133	-2.10907	-6.00579	-6.27728	-6.75695
										AT4G19520	disease resistance protein (TIR-NBS-LRR class), putative	0.504144	0.610094	0.832752	0.682817	0.675693	1.01362	0.693595	0.615135
										AT4G19760	hydrolase, hydrolyzing O-glycosyl compounds	0.363298	0.578384	0.873189	2.84486	2.17601	1.11001	0.978619	2.50889
										AT4G19810	glycosyl hydrolase family 18 protein	0.620515	0.921227	1.21468	1.66397	0.99731	0.752077	0.686528	1.29958
										AT4G19820	glycosyl hydrolase family 18 protein	0.527899	0.757239	1.04447	2.22152	1.58786	0.853491	0.785649	1.90048
										AT4G19920	disease resistance protein (TIR class), putative	-0.432737	-0.61577	-0.998989	-1.15052	-0.60051	-0.877859	-1.25977	-0.6537
										AT4G19925	disease resistance protein (TIR class), putative	-0.39252	-0.610157	-0.333805	-0.372834	-0.638913	-0.666768	-1.35692	-1.46586
										AT4G19960	potassium ion transmembrane transporter	0.498928	0.78057	0.84999	1.05724	0.533904	0.320588	0.267731	0.528342
										AT4G19980	hypothetical protein	-1.39295	-1.39455	-1.96437	-3.04952	-1.14938	-1.18266	-0.873097	-1.94925
										AT4G20190	hypothetical protein	-0.541924	-0.465695	-1.05505	-1.80651	-0.57566	-0.676552	-0.660899	-2.32656
										AT4G20210	terpene synthase/cyclase family protein	-0.360132	-0.60158	-1.13488	-1.46277	-1.17965	-1.04404	-1.15108	-1.6015
										AT4G20235	pseudo	-0.674819	-0.57652	-0.546042	-0.875284	-0.485542	-0.87655	-0.894164	-1.16407
										AT4G20260	DREPP plasma membrane polypeptide family protein	-0.296796	-0.168318	0.0101735	0.245415	-0.0576774	-0.676228	-0.629229	-1.07971
										AT4G20370	TSF (TWIN SISTER OF FT); phosphatidylethanolamine binding	-1.97946	-2.25445	-3.09268	-2.78379	-1.17513	-0.981506	-2.08772	-2.16061
										AT4G20450	leucine-rich repeat protein kinase, putative	-0.232905	-0.90602	-2.21001	-3.57101	-0.801533	-0.61858	-1.29868	-1.4543
										AT4G21020	late embryogenesis abundant domain-containing protein / LEA domain-containing protein	2.56211	2.72445	2.08783	5.79266	2.61445	2.95067	4.33077	5.55025
										AT4G21120	AAT1 (CATIONIC AMINO ACID TRANSPORTER 1); cationic amino acid transmembrane transporter	0.630312	0.778344	1.20151	1.45388	0.883506	1.43927	1.29434	1.66959
										AT4G21440	ATM4/ATMYB102 (ARABIDOPSIS MYB-LIKE 102); DNA binding / transcription factor	0.615359	1.03117	2.09419	2.98601	2.94483	1.98328	2.54466	1.36674
										AT4G21570	hypothetical protein	0.482625	0.65458	1.14831	1.24302	0.579953	0.70217	0.670896	0.785829
										AT4G21620	glycine-rich protein	0.298884	0.338212	0.987204	1.49055	0.932666	1.08287	1.17489	1.48293
										AT4G21760	BGLU47 (Beta-glucosidase 47); hydrolase, hydrolyzing O-glycosyl compounds	0.447803	1.08127	1.2842	0.872507	0.0898677	0.516219	0.481222	0.77948
										AT4G21840	methionine sulfoxide reductase domain-containing protein / SelR domain-containing protein	0.534967	0.937336	1.67713	1.56905	0.188229	1.57235	1.30917	2.07676
										AT4G21910	MATE efflux family protein	0.319624	0.50538	1.19082	1.61423	0.73825	0.605728	0.788433	1.06387
										AT4G21930	hypothetical protein	1.61594	1.5595	2.25259	2.42912	2.07316	2.52335	2.1234	2.61851
										AT4G21940	CPK15 (calcium-dependent protein kinase 15); calmodulin-dependent protein kinase/ kinase	0.695647	0.69846	1.0856	1.08313	0.768145	1.09966	0.896377	1.31186
										AT4G22110	alcohol dehydrogenase, putative	-1.34042	-1.70963	-1.71797	-1.30236	-0.967713	-0.787863	-1.50156	-1.3043
										AT4G22212	hypothetical protein	-1.36043	-2.09593	-1.9891	-2.22973	-0.90783	-1.26281	-1.61614	-1.61775
										AT4G22235	hypothetical protein	-0.442857	-0.454057	-1.02428	-0.90101	0.114747	-0.0133283	0.219471	-0.374922
										AT4G22460	protease inhibitor/seed storage/lipid transfer protein (LTP) family protein	-0.5225	-0.825613	-0.997357	-1.34344	-0.315597	-0.406417	-0.644984	-1.29305
										AT4G22470	protease inhibitor/seed storage/lipid transfer protein (LTP) family protein	1.07287	2.01153	2.76918	3.50547	0.505559	0.817588	1.28724	1.70872
										AT4G22490	protease inhibitor/seed storage/lipid transfer protein (LTP) family protein	1.15506	1.13399	0.780349	0.829509	0.227251	0.574533	0.85337	0.596999
										AT4G22666	hypothetical protein	-0.553728	-1.02438	-1.2872	-1.8761	-0.404009	-0.390897	-0.642247	-1.53141
										AT4G22690	CYP706A1 (cytochrome P450, family 706, subfamily A, polypeptide 1); oxygen binding	-0.690916	-1.25161	-1.38301	-2.01925	-1.21153	-0.81084	-1.40569	-0.738183
										AT4G22753	SMO1-3 (STEROL 4-ALPHA METHYL OXIDASE); catalytic	0.993778	1.18713	1.74407	1.64712	0.6336	1.07346	0.882438	1.10171
										AT4G22870	leucoanthocyanidin dioxygenase, putative / anthocyanidin synthase, putative	1.99828	2.70293	4.2953	5.12577	2.19818	2.25186	3.16	4.30021
										AT4G22880	LDOX (TANNIN DEFICIENT SEED 4)	2.19558	2.78878	4.54587	5.15557	2.17825	2.24976	3.28775	4.2527
										AT4G22990	SPX (SYG1/Pho81/XPR1) domain-containing protein	0.479277	0.706224	0.832113	0.573721	0.805877	0.736534	0.608258	0.568835
										AT4G23070	rhomboid family protein	0.345475	1.10632	0.897717	0.53095	1.12869	0.96928	1.16379	0.70384
										AT4G23220	protein kinase family protein	0.436321	1.1731	1.81131	1.61195	0.89441	2.38869	2.23547	2.86709
										AT4G23230	protein kinase family protein	1.09958	1.58012	1.98802	1.60806	1.12591	2.84292	2.53768	3.0405
										AT4G23250	EMB1290 (EMBRYO DEFECTIVE 1290); kinase	0.756952	0.878616	1.21873	1.36916	0.588575	0.84416	0.848198	1.19911
										AT4G23260	protein kinase	-1.1064	-1.01599	-0.825715	-0.758938	-0.204045	-0.447133	-0.605852	-0.675507
										AT4G23310	receptor-like protein kinase, putative	1.76338	2.71138	2.28084	1.81537	2.00912	4.53377	4.19649	4.56108
										AT4G23340	oxidoreductase, 2OG-Fe(II) oxygenase family protein	-0.835786	-0.810405	-1.43902	-1.84782	-0.40836	-1.18943	-1.33694	-1.43053
										AT4G23600	CORI3 (CORONATINE INDUCED 1, JASMONIC ACID RESPONSIVE 2); transaminase	1.36803	1.45451	2.48276	2.03131	2.5382	2.30942	2.17242	2.25674
										AT4G23670	major latex protein-related / MLP-related	0.310255	0.60682	0.82965	0.971409	1.02225	0.932087	0.952505	1.03666
										AT4G23720	hypothetical protein	0.908659	0.995097	1.16365	1.09027	0.911689	0.866433	0.947565	1.23241
										AT4G23990	ATCSLG3 (Cellulose synthase-like G3); transferase/ transferase, transferring glycosyl groups	0.420534	0.442686	0.924278	0.988601	0.455119	0.658818	0.750943	1.20716
										AT4G24010	ATCSLG1 (Cellulose synthase-like G1); transferase/ transferase, transferring glycosyl groups	1.06314	0.653989	0.973542	0.522953	0.507293	1.11009	0.723203	1.37347
										AT4G24150	AtGRF8 (GROWTH-REGULATING FACTOR 8)	-0.45235	-0.930269	-0.647447	-1.42746	-0.849212	-1.1239	-0.488947	-1.37031
										AT4G24170	kinesin motor family protein	-0.286848	-0.612337	-0.835099	-1.52457	-0.733698	-0.332002	-1.13622	-1.03326
										AT4G24180	hypothetical protein	-0.747081	-0.733293	-0.624494	-0.926331	-0.433706	-0.175963	-0.121444	-0.510546
										AT4G24260	ATGH9A3/KOR3 (ARABIDOPSIS THALIANA GLYCOSYL HYDROLASE 9A3); hydrolase, hydrolyzing O-glycosyl compounds	0.398496	0.639887	0.925775	0.76735	0.796963	0.93406	0.946217	1.23969
										AT4G24275	hypothetical protein	0.166472	0.65314	1.27879	1.51132	0.374713	0.189388	0.448596	0.283526
										AT4G24350	phosphorylase family protein	-0.315037	-0.734583	-1.08303	-1.30052	-0.564536	-0.567485	-0.820232	-0.667908
										AT4G24380	hypothetical protein	0.155493	0.50793	1.20187	1.11737	0.608053	0.494779	0.3648	0.285704
										AT4G24415	miscRNA	0.848622	0.335776	0.572435	-0.176714	-0.21462	0.785064	0.710159	0.5007
										AT4G24450	ATGWD2/GWD3/PWD (PHOSPHOGLUCAN, WATER DIKINASE); ATP binding / kinase	0.289677	0.458051	0.264707	0.523648	1.56455	1.33197	1.37391	1.26125
										AT4G24460	hypothetical protein	-0.619381	-0.337332	-0.405026	-0.597036	-0.679899	-1.0341	-0.469442	-1.89059
										AT4G24540	AGL24 (AGAMOUS-LIKE 24); protein binding / protein heterodimerization/ protein homodimerization/ transcription factor	-0.250762	-0.144529	-0.362571	-1.21114	-0.135041	-0.720464	-0.768605	-1.43684
										AT4G24660	ATHB22/MEE68 (ARABIDOPSIS THALIANA HOMEOBOX PROTEIN 22); DNA binding / transcription factor	0.69744	0.73957	0.945653	1.13656	0.619865	0.737266	0.949646	1.1226
										AT4G24860	AAA-type ATPase family protein	0.64004	0.654947	0.749501	0.678328	0.677959	1.03285	1.06464	1.08933
										AT4G25010	nodulin MtN3 family protein	0.305918	0.560585	1.48574	2.82413	0.450348	2.29534	1.99039	2.45554
										AT4G25070	hypothetical protein	-0.445921	-0.601109	-0.94301	-1.39398	-1.08022	-0.644297	-1.11338	-0.916921
										AT4G25110	ATMC2 (METACASPASE 2); caspase	-0.17495	-0.26784	-0.697142	-0.568731	-0.879561	-0.654785	-1.14427	-0.637448
										AT4G25140	OLEO1 (OLEOSIN1)	1.34606	1.53656	1.47544	4.04944	1.53976	1.42646	3.94261	2.72025
										AT4G25200	ATHSP23-MITO (MITOCHONDRION-LOCALIZED SMALL HEAT SHOCK PROTEIN 23)	2.26006	2.50322	1.79531	2.0625	2.42246	2.74933	3.46561	3.81235
										AT4G25420	GA5 (GA REQUIRING 5); gibberellin 20-oxidase/ gibberellin 3-beta-dioxygenase	-0.339727	-0.635606	-0.554756	-0.683654	-1.06988	-0.302438	-0.496746	-0.258918
										AT4G25940	epsin N-terminal homology (ENTH) domain-containing protein	-0.881479	-0.967245	-1.08734	-1.60723	-1.12518	-1.10196	-0.841938	-1.9099
										AT4G25980	cationic peroxidase, putative	-1.05228	-1.21237	-1.79633	-2.14531	-0.532394	-1.08258	-1.22524	-1.51536
										AT4G26010	peroxidase, putative	-0.155475	-0.361255	-1.0674	-1.73707	-0.379016	-0.410674	-0.72929	-1.24275
										AT4G26050	leucine-rich repeat family protein	-0.606994	-0.328795	-0.239763	-0.640189	-1.15088	-2.62806	-2.15558	-3.72389
										AT4G26220	caffeoyl-CoA 3-O-methyltransferase, putative	-0.372394	-0.587339	-0.882883	-1.0748	-0.362451	-0.268776	-0.61153	-0.396694
										AT4G26380	DC1 domain-containing protein	1.21878	1.10595	1.22457	0.922018	0.57675	0.721851	0.378396	1.0007
										AT4G26530	fructose-bisphosphate aldolase, putative	-0.157509	-0.471608	-0.754008	-0.931326	-0.0780396	-0.183605	-0.260808	-0.309916
										AT4G26790	GDSL-motif lipase/hydrolase family protein	0.506669	0.788203	0.930047	0.986005	0.545825	0.377638	0.161833	0.386899
										AT4G27300	S-locus protein kinase, putative	-0.833734	-1.22032	-1.61826	-1.65477	-0.591606	-0.352968	-0.635064	-0.197913
										AT4G27530	hypothetical protein	1.36651	2.10269	2.20132	2.47074	1.93471	2.14351	2.05356	2.6411
										AT4G27570	glycosyltransferase family protein	0.347553	0.596743	1.07553	3.21332	2.77047	1.6985	1.60883	3.26752
										AT4G27652	hypothetical protein	0.518668	0.549641	1.64361	2.17335	0.789139	0.895832	1.04307	0.799679
										AT4G27970	SLAH2 (SLAC1 HOMOLOGUE 2); transporter	0.132237	0.571072	0.983878	1.40554	0.0960836	0.224639	0.273504	0.54151
										AT4G28080	binding	-0.302906	-0.360094	-0.885175	-1.13052	-0.867252	-0.284142	-0.37428	-0.531177
										AT4G28140	AP2 domain-containing transcription factor, putative	1.95586	1.25772	1.85799	1.50917	1.64174	1.70637	0.66041	0.568493
										AT4G28240	wound-responsive protein-related	-0.460739	-0.635649	-0.726057	-1.16214	-0.35635	-0.391628	-0.414297	-0.722926
										AT4G28460	hypothetical protein	-2.0475	-1.33716	-1.56963	-1.72819	-1.45042	-1.66222	-0.639417	-2.05495
										AT4G28620	ATM2 (ABC TRANSPORTER OF THE MITOCHONDRION); ATPase, coupled to transmembrane movement of substances	1.80298	1.83407	1.85919	2.98416	2.89495	2.30416	1.6128	2.64024
										AT4G28650	leucine-rich repeat transmembrane protein kinase, putative	-0.458369	-0.524635	-1.41101	-1.98706	-0.816144	-0.283243	-0.474117	-0.854229
										AT4G28720	flavin-containing monooxygenase family protein / FMO family protein	-0.454381	-0.329837	-0.830943	-1.13456	-0.833702	-0.71169	-0.452481	-1.642
										AT4G28850	xyloglucan:xyloglucosyl transferase, putative / xyloglucan endotransglycosylase, putative / endo-xyloglucan transferase, putative	-0.33599	-0.655766	-1.89309	-3.40279	-0.595262	-1.06983	-1.57291	-2.25342
										AT4G29190	zinc finger (CCCH-type) family protein	-0.427538	-0.720007	-0.830459	-1.03314	-0.77815	-0.999576	-1.21458	-1.28865
										AT4G29780	hypothetical protein	0.565252	0.773793	0.993797	1.51374	1.10703	1.5616	1.02261	1.23957
										AT4G30060	hypothetical protein	-0.491939	-0.412047	-0.534523	-0.523133	-0.177367	-0.520679	-0.26659	-0.931729
										AT4G30160	VLN4 (ARABIDOPSIS THALIANA VILLIN 4); actin binding	-0.414003	-0.361156	-0.643026	-0.448159	-0.498763	-0.789616	-0.396042	-1.43218
										AT4G30270	MERI5B (MERISTEM-5); hydrolase, acting on glycosyl bonds / xyloglucan:xyloglucosyl transferase	-2.02168	-1.75534	-1.46062	-1.29102	-0.821447	-1.65559	-2.09407	-2.07686
										AT4G30430	TET9 (TETRASPANIN9)	0.863039	1.82126	3.13836	3.09546	0.774201	1.03018	0.655469	0.393762
										AT4G30650	hydrophobic protein, putative / low temperature and salt responsive protein, putative	1.08795	1.04129	1.18124	1.11541	1.04224	1.16493	1.21596	1.45068
										AT4G31320	auxin-responsive protein, putative / small auxin up RNA (SAUR_C)	-0.212004	-0.301324	-0.849256	-1.33535	-0.268339	-0.467128	-0.364779	-1.32421
										AT4G31398	misc_RNA	0.834998	1.22137	1.4635	2.00309	0.717269	0.811385	1.15035	1.42205
										AT4G31710	ATGLR2 (Arabidopsis thaliana glutamate receptor 2)	-0.25758	-0.186227	-0.479035	-1.48862	-0.888717	-0.65797	-1.25532	-1.61427
										AT4G31760	peroxidase, putative	1.3961	1.32332	1.47151	1.14512	2.09068	2.94395	3.03284	3.45686
										AT4G31850	PGR3 (PROTON GRADIENT REGULATION 3)	-0.377516	-0.578466	-1.00634	-1.53543	-0.480828	-0.309728	-0.656112	-0.689627
										AT4G31875	hypothetical protein	-0.240436	-0.829517	-0.958988	-1.59163	-0.589242	-0.86664	-1.46858	-1.28902
										AT4G31877	misc_RNA	0.567093	0.328289	0.353566	0.8864	0.803539	0.985302	1.13203	1.3521
										AT4G31950	CYP82C3 (cytochrome P450, family 82, subfamily C, polypeptide 3); oxygen binding	-5.11088	-5.14035	-4.95036	-4.07536	-5.12353	-5.06985	-5.12647	-5.06513
										AT4G31970	CYP82C2 (cytochrome P450, family 82, subfamily C, polypeptide 2); oxygen binding	-6.77507	-6.90883	-6.80279	-6.65218	-6.74766	-6.88801	-6.66095	-6.77422
										AT4G32510	anion exchanger	0.962789	1.0776	1.20305	0.65843	1.70723	1.3747	1.49774	1.72082
										AT4G32785	hypothetical protein	-0.535216	-0.500397	-0.842646	-1.07453	-0.234171	-0.621342	-0.655358	-0.908535
										AT4G32810	CCD8 (CAROTENOID CLEAVAGE DIOXYGENASE 8)	-0.475596	-0.552529	-1.2337	-1.6262	-0.237777	-1.05925	-1.38494	-1.33374
										AT4G33240	1-phosphatidylinositol-4-phosphate 5-kinase/ zinc ion binding	-0.530588	-0.257135	-0.384881	-0.76041	-1.10694	-0.893077	-0.633291	-1.47737
										AT4G33300	ADR1-L1 (ADR1-LIKE 1); ATP binding / protein binding	-0.210421	-0.157946	-0.263866	-0.232316	-0.219062	0.0426868	0.00133752	0.187063
										AT4G33330	PGSIP3 (PLANT GLYCOGENIN-LIKE STARCH INITIATION PROTEIN 3); transferase, transferring glycosyl groups	-0.237332	-0.631893	-0.950687	-1.55656	-0.350912	-0.100468	-0.448179	-0.331152
										AT4G33420	peroxidase, putative	-0.87074	-0.787973	-0.74165	-0.846311	-0.335069	-0.77593	-0.767765	-1.09655
										AT4G33550	lipid binding	1.11999	2.19263	2.99972	3.30477	3.39861	2.95165	3.51474	3.33857
										AT4G33800	hypothetical protein	-0.314442	-0.253749	-0.590647	-1.35837	-0.485568	-0.536067	-0.395467	-1.36461
										AT4G33905	peroxisomal membrane protein 22 kDa, putative	1.26776	0.927373	1.49315	2.42328	1.36707	1.84596	2.1279	2.94174
										AT4G33980	hypothetical protein	-0.661793	-0.598877	-0.662671	-0.59886	-0.26459	-1.00286	-0.89091	-1.10351
										AT4G34100	protein binding / zinc ion binding	-0.600517	-0.472273	-0.588419	-1.02501	-0.891662	-0.896035	-0.761286	-1.33015
										AT4G34170	kelch repeat-containing F-box family protein	0.926636	0.783637	0.719689	1.43503	1.6163	1.4998	1.25108	1.93439
										AT4G34250	fatty acid elongase, putative	0.396746	0.965241	1.55774	1.66666	1.05319	0.708684	1.26391	0.827667
										AT4G34380	transducin family protein / WD-40 repeat family protein	-0.516053	-0.871654	-1.52761	-2.75624	-0.792912	-0.453372	-1.14155	-1.36535
										AT4G34400	DNA binding / transcription factor	-1.1873	-1.09487	-0.475631	-0.723217	-0.644299	-1.41651	-1.20633	-1.23879
										AT4G34550	hypothetical protein	-2.02266	-1.52028	-1.95812	-1.9434	-0.58214	-1.51082	-1.4485	-1.47687
										AT4G34650	SQS2 (SQUALENE SYNTHASE 2); farnesyl-diphosphate farnesyltransferase	1.03326	0.946355	1.22474	1.44123	0.982799	1.36204	1.01236	1.54231
										AT4G34710	ADC2 (ARGININE DECARBOXYLASE 2)	0.717844	0.908906	1.34528	1.23084	0.863273	1.09394	1.25848	1.37771
										AT4G34930	1-phosphatidylinositol phosphodiesterase-related	-0.520625	-0.65093	-0.8313	-1.32198	-0.894271	-0.74068	-1.30277	-0.878231
										AT4G34940	armadillo/beta-catenin repeat family protein	-1.77692	-2.42804	-2.27069	-2.38643	-1.15633	-2.46777	-1.32166	-2.33469
										AT4G35190	hypothetical protein	-0.4353	-0.807225	-1.15632	-1.71263	-0.16938	-0.44855	-0.916841	-1.35551
										AT4G35200	hypothetical protein	-0.657723	-0.736907	-1.28381	-1.6891	-0.705123	-0.586851	-0.924214	-1.5666
										AT4G35380	guanine nucleotide exchange family protein	-0.634795	-0.813683	-1.05125	-1.37142	-0.927641	-0.75419	-0.995077	-0.864029
										AT4G35660	hypothetical protein	-0.752184	-1.15566	-1.16018	-1.10398	-0.493218	-0.388875	-0.696185	-0.557265
										AT4G35720	hypothetical protein	0.974269	1.46154	1.68133	1.44665	0.283518	0.978584	1.77225	2.15684
										AT4G35810	oxidoreductase, 2OG-Fe(II) oxygenase family protein	1.136	0.930866	0.644046	1.83154	1.47056	1.17712	1.13959	1.99928
										AT4G35900	FD; DNA binding / transcription factor	-0.924049	-1.11604	-1.18937	-1.22839	-0.370488	-1.10881	-1.0688	-1.07898
										AT4G36040	DNAJ heat shock N-terminal domain-containing protein (J11)	-0.834079	-0.859917	-0.893697	-1.07442	-0.805416	-1.186	-1.20897	-1.23827
										AT4G36280	ATP-binding region, ATPase-like domain-containing protein	0.887446	0.51893	0.843925	0.184265	0.0693092	0.817412	0.854556	0.80662
										AT4G36600	late embryogenesis abundant domain-containing protein / LEA domain-containing protein	2.14187	2.44447	1.76475	5.09841	2.89652	2.72676	2.95533	4.40671
										AT4G36820	hypothetical protein	0.746454	0.769654	0.986365	1.71675	1.12308	1.33301	0.837475	1.60097
										AT4G36830	GNS1/SUR4 membrane family protein	0.519564	0.268692	0.76143	1.23329	0.700085	0.866882	0.768015	1.14665
										AT4G36920	AP2 (APETALA 2); transcription factor	-0.638268	-0.668276	-0.830382	-1.02983	-0.657252	-0.648016	-0.708163	-0.858903
										AT4G36950	MAPKKK21; ATP binding / protein kinase	0.699159	0.838327	2.32397	2.87026	1.04812	1.86328	1.39501	3.19669
										AT4G37180	myb family transcription factor	0.810601	0.829405	0.946026	1.0893	1.02163	1.08318	0.907165	1.27694
										AT4G37225	misc_RNA	0.402461	0.476686	0.666541	0.873178	1.3177	1.00619	0.922563	1.14506
										AT4G37290	hypothetical protein	-2.0495	-3.03829	-3.29325	-3.46114	-1.91284	-1.75251	-1.10795	-1.73086
										AT4G37390	YDK1 (YADOKARI 1); indole-3-acetic acid amido synthetase	-0.592427	-1.21374	-2.11281	-3.08393	-0.602937	-0.728478	-1.44253	-1.58959
										AT4G37430	CYP91A2 (CYTOCHROME P450 MONOOXYGENASE 91A2); oxygen binding	-0.239549	-0.391414	-0.363871	-0.469587	-0.915889	-0.91729	-1.08844	-0.793367
										AT4G37608	hypothetical protein	0.608022	0.846757	1.03221	1.26674	0.777547	0.747658	0.915172	0.958436
										AT4G37610	BT5 (BTB and TAZ domain protein 5); protein binding / transcription regulator	-0.9357	-1.20698	-1.82984	-2.82247	-1.03454	-1.02253	-1.5182	-1.7523
										AT4G37690	galactosyl transferase GMA12/MNN10 family protein	0.449724	0.333463	0.510602	0.419886	0.814212	1.0408	0.63126	0.920664
										AT4G37730	ATBZIP7 (ARABIDOPSIS THALIANA BASIC LEUCINE-ZIPPER 7); DNA binding / transcription factor	-0.587361	-0.707871	-1.02064	-1.63503	-0.202031	-0.39437	-0.416278	-0.705125
										AT4G37750	ANT (AINTEGUMENTA); DNA binding / transcription factor	0.614415	0.675968	0.516233	0.267071	0.271754	0.689365	1.10059	0.941409
										AT4G37970	mannitol dehydrogenase, putative	0.555187	0.876305	0.826391	0.598702	1.10328	0.630947	0.867916	0.942494
										AT4G38210	ATEXPA20 (ARABIDOPSIS THALIANA EXPANSIN A20)	0.257421	0.479527	0.825528	0.936401	0.191463	0.529523	0.834698	0.957118
										AT4G38340	RWP-RK domain-containing protein	0.821915	0.990024	1.37353	1.31372	0.53166	1.16989	1.10055	1.61424
										AT4G38470	protein kinase family protein	-0.453288	-0.492157	-0.808302	-1.42523	-0.548439	-0.236643	-0.575587	-0.796881
										AT4G38590	BGAL14 (beta-galactosidase 14); beta-galactosidase	-0.117195	0.85801	-0.332837	0.0211591	-0.72037	-0.51598	0.129086	0.520744
										AT4G39070	zinc finger (B-box type) family protein	-1.14731	-0.799761	-0.506289	-0.317563	-0.377102	-0.677443	-0.601884	-0.567261
										AT4G39210	APL3 (large subunit of AGP 3)	0.574351	0.733636	1.42486	2.04414	1.14782	1.28742	1.43293	2.00329
										AT4G39250	DNA binding / transcription factor	-0.768336	-3.17479	-2.24438	-1.75565	-4.96143	-3.56246	-4.9424	-4.94264
										AT4G39320	microtubule-associated protein-related	1.3307	1.41055	2.02722	2.40952	0.954047	1.29647	1.35821	1.52448
										AT4G39340	hypothetical protein	0.988719	1.16901	1.97521	0.911493	0.925039	1.8167	1.32758	1.0434
										AT4G39710	immunophilin, putative / FKBP-type peptidyl-prolyl cis-trans isomerase, putative	-0.0682747	-0.365785	-0.763998	-1.0342	0.12724	0.0191882	-0.207084	-0.253749
										AT4G39830	L-ascorbate oxidase, putative	0.359933	1.61973	1.91158	2.00777	0.342626	0.837678	1.34082	1.25538
										AT4G40090	AGP3 (ARABINOGALACTAN-PROTEIN 3)	-0.179587	-0.561271	-1.31757	-1.58555	-0.291465	-0.235333	-0.591506	-0.737817
										AT5G01040	LAC8 (laccase 8); copper ion binding / oxidoreductase	-0.527075	-0.831126	-1.16589	-1.01634	-0.519778	-0.385571	-0.734434	-0.358555
										AT5G01050	laccase family protein / diphenol oxidase family protein	-0.244408	-0.527589	-0.381912	-1.1699	-0.76824	-0.419535	-1.17183	-1.04813
										AT5G01300	phosphatidylethanolamine-binding family protein	2.01778	2.013	2.92762	3.63499	3.34247	3.91367	4.21	4.95406
										AT5G01540	lectin protein kinase, putative	0.131806	0.487486	1.35641	1.45287	0.170477	0.928291	1.08412	1.34722
										AT5G01660	kelch repeat-containing protein	0.422172	0.483605	0.446629	0.490092	0.165982	0.42865	0.72448	1.02585
										AT5G01732	misc_RNA	-1.0782	-0.89846	-0.707215	-0.704645	-0.958098	-0.589045	-0.737601	-0.436291
										AT5G01740	hypothetical protein	-0.219307	-0.318139	-0.916724	-1.51336	-1.3013	-1.06765	-1.25563	-1.13581
										AT5G01830	armadillo/beta-catenin repeat family protein / U-box domain-containing protein	-0.505213	-0.414832	-0.543156	-0.758824	-0.372389	-0.435132	-0.386661	-1.14836
										AT5G01950	ATP binding / kinase/ protein serine/threonine kinase	-1.00775	-0.431657	-0.681968	-0.860308	-1.20045	-0.657131	-0.664182	-0.806909
										AT5G02020	hypothetical protein	1.80578	1.03743	1.40065	1.43684	1.57478	2.04664	1.783	1.98918
										AT5G02160	hypothetical protein	-0.133426	-0.274153	-0.432627	-0.931567	-0.443608	-0.494309	-0.605557	-1.06607
										AT5G02180	amino acid transporter family protein	-0.515227	-0.719479	-0.735834	-0.42656	-0.653802	-1.65555	-1.17281	-0.997091
										AT5G02260	ATEXPA9 (ARABIDOPSIS THALIANA EXPANSIN A9)	-0.57951	-0.186932	-0.758223	-0.666939	-0.62099	-0.875423	-0.260616	-1.61353
										AT5G02570	histone H2B, putative	0.902758	0.634386	0.642507	1.09264	1.2348	1.1299	0.887422	1.52076
										AT5G02810	PRR7 (PSEUDO-RESPONSE REGULATOR 7); transcription regulator	-0.679685	-0.773924	-0.984388	-0.526764	-0.930426	-1.22174	-1.03444	-1.47648
										AT5G03190	CPuORF47 (Conserved peptide upstream open reading frame 47)	0.416792	0.516937	0.879245	1.02298	3.73036	3.77218	4.152	4.07763
										AT5G03210	hypothetical protein	2.99231	2.68416	3.56142	4.03171	2.5684	3.70123	3.21124	3.93608
										AT5G03350	legume lectin family protein	2.14474	2.61027	1.91891	0.968511	0.582491	2.36141	1.13695	1.64405
										AT5G03390	hypothetical protein	-0.552453	-1.26223	-1.62186	-2.08686	-0.924223	-0.723933	-0.801187	-0.340328
										AT5G03640	protein kinase family protein	-0.118231	-0.560762	-1.00522	-1.28854	-0.379161	-0.269665	-0.900829	-0.712455
										AT5G03790	ATHB51/LMI1 (LATE MERISTEM IDENTITY1); DNA binding / sequence-specific DNA binding / transcription factor	0.976285	1.17454	1.74259	2.04723	0.242402	1.16047	1.48369	1.46872
										AT5G03995	hypothetical protein	-0.929979	-0.965198	-1.43736	-2.43475	-0.9439	-1.58402	-1.6558	-1.92737
										AT5G04250	OTU-like cysteine protease family protein	0.379232	0.328939	0.698875	0.790941	0.562667	0.484675	0.409834	0.592879
										AT5G04530	beta-ketoacyl-CoA synthase family protein	0.573532	0.62856	0.757712	0.656124	0.62518	0.857392	0.821246	1.18407
										AT5G04730	hypothetical protein	-0.32641	-0.866114	-1.28062	-2.14598	-1.34799	-2.51733	-3.20084	-2.87326
										AT5G04950	nicotianamine synthase, putative	0.783451	1.02463	1.57181	1.64739	0.723549	0.972352	1.02501	1.42802
										AT5G05220	hypothetical protein	4.10807	4.3776	6.06719	6.59872	4.7655	4.67277	4.60227	5.56279
										AT5G05260	CYP79A2 (CYTOCHROME P450 79A2); oxygen binding	-2.93066	-2.36411	-1.76835	-2.16583	-1.58903	-2.68679	-2.93369	-3.04798
										AT5G05270	chalcone-flavanone isomerase family protein	-1.54424	-0.821959	-0.543547	-0.410117	-0.460405	-1.2086	-0.453556	-1.73412
										AT5G05340	peroxidase, putative	1.84872	2.46255	3.68147	3.53628	2.68206	2.21926	3.0085	3.05062
										AT5G05365	metal ion binding	0.389743	1.276	1.51383	1.77115	1.68491	0.969263	1.06561	0.479628
										AT5G05390	LAC12 (laccase 12); copper ion binding / oxidoreductase	0.842552	1.15319	1.88937	2.16741	1.46966	1.07324	1.2823	1.41068
										AT5G05420	immunophilin, putative / FKBP-type peptidyl-prolyl cis-trans isomerase, putative	-1.27208	-1.51504	-1.73117	-1.62663	-0.253647	-0.638659	-0.461916	-0.367004
										AT5G05440	hypothetical protein	-1.2523	-0.690145	-0.50249	-0.406301	-0.619177	-1.31645	-1.00327	-1.50711
										AT5G05640	nucleoprotein-related	-0.800514	-0.703993	-1.09862	-1.35737	-0.463511	-0.632665	-0.313066	-0.756472
										AT5G05790	myb family transcription factor	-0.726633	-0.973401	-1.37316	-1.35093	-0.933299	-0.827886	-1.11211	-1.0492
										AT5G05810	ATL43; protein binding / zinc ion binding	0.427494	0.901978	1.46725	1.64485	0.591266	0.736366	1.38696	0.731065
										AT5G05890	UDP-glucoronosyl/UDP-glucosyl transferase family protein	-0.157241	-0.484946	-0.990097	-1.42765	-0.108412	-0.342647	-0.486815	-0.53242
										AT5G05900	UDP-glucoronosyl/UDP-glucosyl transferase family protein	-0.755196	-0.712632	-1.85103	-1.80259	-0.760288	-0.409182	-0.402319	-0.393655
										AT5G06190	hypothetical protein	0.874477	1.24837	1.75369	1.99608	1.10694	0.82249	1.01507	0.724651
										AT5G06200	integral membrane family protein	-0.355656	-0.683282	-0.614827	-1.1926	-0.810029	-0.172705	-0.968473	-0.806184
										AT5G06250	hypothetical protein	-0.549384	-0.364797	-0.453466	-0.754533	-0.977452	-1.13358	-1.29176	-1.49855
										AT5G06300	carboxy-lyase	-0.768068	-1.04656	-1.05634	-1.06135	-0.623718	-0.306657	-0.710622	-0.477367
										AT5G06460	ATUBA2 (Arabidopsis thaliana ubiquitin activating enzyme 2); ubiquitin activating enzyme	-0.230558	-0.00199758	-0.222332	-0.0497383	-0.475434	-0.213884	-0.0233397	-0.309626
										AT5G06510	CCAAT-binding transcription factor (CBF-B/NF-YA) family protein	-1.0154	-1.10923	-0.342803	-0.169373	-0.747859	-1.17903	-1.34318	-1.29826
										AT5G06530	ABC transporter family protein	0.304939	0.155619	0.229984	0.377435	0.974495	0.599815	0.511775	0.546612
										AT5G06800	myb family transcription factor	-0.278736	-0.174253	-0.489757	-0.868538	-0.526916	-0.472261	-0.457407	-1.32966
										AT5G06860	PGIP1 (POLYGALACTURONASE INHIBITING PROTEIN 1); protein binding	0.629341	0.902295	1.80864	2.20155	0.657117	1.09238	1.3189	2.33832
										AT5G06870	PGIP2 (POLYGALACTURONASE INHIBITING PROTEIN 2); protein binding	0.533025	0.503798	1.62416	1.19131	0.738746	0.834115	0.67399	0.661722
										AT5G06900	CYP93D1 (cytochrome P450, family 93, subfamily D, polypeptide 1); oxygen binding	-1.23047	-1.50972	-2.10752	-1.53898	-2.27913	-1.47321	-2.22053	-1.69006
										AT5G06980	hypothetical protein	-0.700493	-0.678284	-0.386811	-0.0809668	-0.735437	-1.50062	-1.53582	-1.53103
										AT5G07010	sulfotransferase family protein	-1.14903	-1.42908	-1.9279	-1.56663	-1.23161	-1.17551	-1.44039	-1.53574
										AT5G07040	zinc finger (C3HC4-type RING finger) family protein	-0.342321	-0.358142	-1.07629	-1.55686	-0.559059	-0.321724	-0.244758	-0.858276
										AT5G07150	leucine-rich repeat family protein	-0.431546	-0.531118	-0.887285	-1.40892	-1.39267	-1.04678	-1.47367	-1.40326
										AT5G07190	ATS3 (ARABIDOPSIS THALIANA SEED GENE 3)	-1.02932	-0.792425	-1.6083	-1.61221	-0.633994	-0.422662	-0.462671	-0.755551
										AT5G07330	hypothetical protein	0.98406	0.389068	0.320267	1.48915	1.61359	1.70056	1.30645	1.05325
										AT5G07390	ATRBOHA (RESPIRATORY BURST OXIDASE HOMOLOG A); FAD binding / calcium ion binding / iron ion binding / oxidoreductase	-0.547354	-0.705206	-0.62603	-1.49404	-1.1361	-1.1782	-1.4821	-1.85628
										AT5G07560	GRP20 (Glycine rich protein 20); nutrient reservoir	-0.444049	-1.00314	-1.78003	-1.88545	-1.17834	-1.60209	-2.21962	-1.60187
										AT5G07690	MYB29 (myb domain protein 29); DNA binding / transcription factor	0.417335	0.754369	1.08069	1.08637	1.14651	0.637819	1.2009	0.905061
										AT5G07700	MYB76 (myb domain protein 76); DNA binding / transcription factor	1.11023	1.35848	1.81184	1.68267	2.00594	1.99989	2.00573	2.41393
										AT5G08000	E13L3 (GLUCAN ENDO-1,3-BETA-GLUCOSIDASE-LIKE PROTEIN 3)	0.512833	0.639642	0.806972	1.04437	0.331231	0.361252	0.552424	0.490836
										AT5G08350	GRAM domain-containing protein / ABA-responsive protein-related	-1.06623	-0.973182	-0.767638	-0.948562	-0.28232	-0.499581	-0.517169	-0.933239
										AT5G08640	FLS (FLAVONOL SYNTHASE)	-1.03337	-0.658175	-0.595278	-0.500412	-0.11799	-0.455569	-0.344634	-0.248791
										AT5G09210	DNA binding / transcription factor	1.16814	1.52559	0.914879	1.36476	2.27144	2.31351	2.75336	2.13768
										AT5G09560	KH domain-containing protein	0.666721	0.59309	0.508699	1.23866	1.08407	1.09637	1.28983	2.0656
										AT5G09720	magnesium transporter CorA-like family protein (MRS2-8)	0.811008	0.465731	0.63718	0.245617	-0.065025	0.304043	0.450422	0.938175
										AT5G09730	BXL3 (BETA-XYLOSIDASE 3); hydrolase, hydrolyzing O-glycosyl compounds	0.939478	1.13142	0.7575	0.546911	1.17073	0.79229	0.870274	1.18693
										AT5G09950	pentatricopeptide (PPR) repeat-containing protein	0.380625	0.389958	0.431074	0.658168	0.279644	0.738476	0.612759	1.08535
										AT5G10100	trehalose-6-phosphate phosphatase, putative	-0.561642	-1.07858	-1.83556	-2.67642	-0.437374	-0.629866	-1.0657	-1.27445
										AT5G10170	inositol-3-phosphate synthase, putative / myo-inositol-1-phosphate synthase, putative / MI-1-P synthase, putative	-0.466394	-0.651558	-1.2774	-1.66244	-0.488997	-0.565058	-0.612556	-0.520692
										AT5G10510	AIL6 (AINTEGUMENTA-LIKE 6)	-0.484956	-0.332919	-0.868202	-1.13115	-0.994597	-0.637915	-0.444728	-0.891791
										AT5G10520	RBK1 (ROP BINDING PROTEIN KINASES 1); kinase	-0.720622	-0.564646	-0.83777	-0.974435	-0.598605	-1.07283	-0.752531	-1.32461
										AT5G10720	AHK5 (CYTOKININ INDEPENDENT 2)	-0.23846	-0.412847	-1.11933	-1.2923	-0.339248	-0.123653	-0.277432	-0.269399
										AT5G10946	hypothetical protein	0.734838	0.443192	0.30137	0.412189	1.11121	1.14462	1.16376	1.3468
										AT5G10970	zinc finger (C2H2 type) family protein	-0.235944	-0.313919	-0.605682	-1.32306	-0.271251	-0.144154	-0.28097	-0.60218
										AT5G11320	YUC4 (YUCCA4); monooxygenase	0.702852	0.591277	0.763663	0.92257	0.0965626	0.900168	1.19326	1.23494
										AT5G11360	ATP binding / protein kinase	0.530002	1.12647	1.80536	2.17376	0.904172	0.644434	0.660087	0.751657
										AT5G11920	ATCWINV6 (6-&1-FRUCTAN EXOHYDROLASE); hydrolase, hydrolyzing O-glycosyl compounds / inulinase/ levanase	-0.45641	-0.547695	-0.909305	-1.65493	-0.60306	-0.373838	-0.812542	-0.57713
										AT5G11930	glutaredoxin family protein	0.43864	0.454703	0.980888	1.3249	0.323659	0.493474	0.502868	0.808671
										AT5G11940	subtilase family protein	-2.25292	-2.07234	-1.71959	-0.772532	-0.607338	-1.2141	-0.9029	-1.05421
										AT5G12340	hypothetical protein	-1.28574	-1.10408	-1.01199	-0.361382	-0.743617	-1.19473	-1.12316	-0.856239
										AT5G13080	WRKY75 (WRKY DNA-BINDING PROTEIN 75); transcription factor	0.710454	0.738112	1.06078	1.00505	0.600721	1.3976	0.984209	1.41933
										AT5G13150	ATEXO70C1 (exocyst subunit EXO70 family protein C1); protein binding	-0.270204	-0.306665	-0.604868	-0.840027	-0.225135	-0.389116	-0.276934	-1.27809
										AT5G13170	nodulin MtN3 family protein	0.170492	0.695873	1.54112	1.86934	3.37238	2.10757	2.88166	3.09769
										AT5G13200	GRAM domain-containing protein / ABA-responsive protein-related	0.582288	1.07143	1.85909	2.03689	0.622462	0.869179	0.800169	1.15691
										AT5G13220	JAS1/JAZ10/TIFY9 (JASMONATE-ZIM-DOMAIN PROTEIN 10)	0.536008	0.946789	2.78559	3.08874	0.242353	0.720134	0.654567	0.920952
										AT5G13320	PBS3 (AVRPPHB SUSCEPTIBLE 3)	0.408109	0.86951	1.38228	1.81547	0.552322	0.814344	0.533193	0.475282
										AT5G13600	phototropic-responsive NPH3 family protein	1.21176	1.31176	1.83786	1.73116	0.962166	1.26261	1.26497	1.65001
										AT5G13930	ATCHS/CHS/TT4 (CHALCONE SYNTHASE); naringenin-chalcone synthase	-1.23841	-0.702026	-0.484794	-0.201299	-0.122033	-0.626574	-0.392455	-0.239347
										AT5G14090	hypothetical protein	0.28311	0.109576	0.394738	0.711117	0.479792	0.805811	0.719533	1.16572
										AT5G14110	hypothetical protein	-0.690998	-0.69747	-0.648429	-0.941792	-0.32854	-0.353394	-0.536848	-1.13075
										AT5G14180	MPL1 (MYZUS PERSICAE-INDUCED LIPASE 1); catalytic	0.546875	0.340047	1.19508	1.3309	0.518401	0.506125	0.837157	0.83458
										AT5G14330	hypothetical protein	-0.422462	-0.821274	-1.49273	-1.99208	-0.533179	-0.388092	-0.849421	-1.2509
										AT5G14340	AtMYB40 (myb domain protein 40); DNA binding / transcription factor	-0.97975	-1.62908	-2.11634	-2.22573	-0.732285	-0.421959	-1.12508	-1.30041
										AT5G14650	polygalacturonase, putative / pectinase, putative	0.973795	1.12495	1.25461	1.29047	1.04223	0.616982	0.528065	1.04515
										AT5G14690	hypothetical protein	-0.670952	-0.922843	-1.54105	-1.87281	-0.541501	-0.250044	-0.303684	-0.651242
										AT5G14750	ATMYB66/WER/WER1 (WEREWOLF 1); DNA binding / protein binding / transcription factor/ transcription regulator	-0.536116	-0.698425	-1.3466	-1.8317	-0.514892	-0.34598	-0.267631	-0.95329
										AT5G15030	paired amphipathic helix repeat-containing protein	0.552977	0.546756	0.823001	0.787899	0.357815	0.401748	0.485267	0.393057
										AT5G15130	WRKY72 (WRKY DNA-binding protein 72); transcription factor	-0.733438	-0.504815	-0.508039	-0.551261	-0.555083	-0.860723	-0.79822	-1.0316
										AT5G15150	ATHB-3 (ARABIDOPSIS THALIANA HOMEOBOX 3); DNA binding / transcription factor	-0.0858688	-0.212193	-0.596823	-1.19827	-0.474687	-0.230276	-0.210337	-0.793024
										AT5G15265	hypothetical protein	-0.286143	-0.408938	-1.03211	-1.22665	-0.528664	-0.330742	-0.365427	-0.894674
										AT5G15500	ankyrin repeat family protein	1.33457	1.23409	2.01195	2.54418	3.17605	3.41084	3.5506	3.96875
										AT5G15725	hypothetical protein	-0.933335	-1.07442	-2.26712	-2.56767	-0.579688	-0.483669	-0.150849	-1.2078
										AT5G15800	SEP1 (SEPALLATA1)	-0.460035	-0.902794	-0.830218	-1.15691	-0.291847	-1.62977	-1.88544	-2.04949
										AT5G15960	KIN1	1.27734	1.38825	1.45869	1.62975	1.63849	1.73265	1.79073	1.79997
										AT5G15970	KIN2 (COLD-RESPONSIVE 6)	1.55378	1.52326	1.76031	1.8846	2.01978	1.92749	1.88044	1.85832
										AT5G16330	NC domain-containing protein	-0.642393	-1.56551	-2.46883	-2.45625	-2.03613	-1.65318	-2.46083	-2.45642
										AT5G16360	NC domain-containing protein	0.308319	0.423485	0.855477	1.35662	0.22096	0.355341	0.149989	0.346725
										AT5G16450	dimethylmenaquinone methyltransferase family protein	0.136252	0.181565	0.444963	0.523667	0.0959392	0.0429771	0.124334	0.0478041
										AT5G16540	ZFN3 (ZINC FINGER PROTEIN 3); nucleic acid binding	-0.172145	-0.33842	-0.646025	-1.4251	-0.581408	-0.217097	-0.310189	-0.701686
										AT5G16570	GLN1;4 (Glutamine synthetase 1;4); glutamate-ammonia ligase	-0.424125	-1.02107	-0.753266	-0.39061	-0.610536	-0.773232	-0.765946	-0.355858
										AT5G16720	hypothetical protein	-0.274214	-0.285323	-0.547561	-1.02966	-0.437424	-0.68231	-0.354037	-0.704794
										AT5G16910	ATCSLD2 (Cellulose synthase-like D2); cellulose synthase/ transferase, transferring glycosyl groups	0.048912	0.151088	0.0194438	0.015506	-0.128755	-0.0982155	-0.213689	-0.0350568
										AT5G17040	UDP-glucoronosyl/UDP-glucosyl transferase family protein	-1.60303	-0.90085	-1.35467	-1.07153	-1.20792	-1.13452	-0.794025	-0.947362
										AT5G17220	ATGSTF12 (GLUTATHIONE S-TRANSFERASE 26); glutathione transferase	1.15534	1.83958	3.30255	4.24975	1.88824	1.89809	2.4756	3.41488
										AT5G17330	GAD (Glutamate decarboxylase 1); calmodulin binding	-0.357673	-0.503627	-0.798063	-0.915258	-0.556921	-0.188513	-0.341522	-0.197055
										AT5G17460	hypothetical protein	0.430099	0.26658	0.765466	0.800544	1.08679	1.00698	0.7275	0.776751
										AT5G17520	RCP1 (ROOT CAP 1)	0.557262	0.62005	0.847157	0.813031	1.00835	0.948733	0.987437	0.918068
										AT5G17600	zinc finger (C3HC4-type RING finger) family protein	0.645596	0.473742	0.783245	1.09937	0.419326	0.657409	0.637794	0.864023
										AT5G17810	WOX12 (WUSCHEL RELATED HOMEOBOX 12); DNA binding / transcription factor	0.0109383	0.328751	0.690553	1.11178	-0.0459516	0.15037	0.074472	0.772023
										AT5G17850	cation exchanger, putative (CAX8)	0.412182	0.796687	1.24776	1.54777	0.464233	0.343556	0.216992	0.329872
										AT5G17920	ATCIMS (COBALAMIN-INDEPENDENT METHIONINE SYNTHASE); 5-methyltetrahydropteroyltriglutamate-homocysteine S-methyltransferase/ methionine synthase	-0.370197	-0.0903321	-0.185378	0.00375182	-0.440317	-0.705289	-0.376446	-1.01601
										AT5G17960	DC1 domain-containing protein	-1.39971	-1.46672	-3.17809	-3.49375	-1.08255	-0.853552	-0.739887	-1.41571
										AT5G18000	transcriptional factor B3 family protein	0.557724	1.25518	0.81918	1.03109	0.209163	0.8453	0.746902	1.30271
										AT5G18350	disease resistance protein (TIR-NBS-LRR class), putative	-1.26532	-0.370426	1.8393	0.64367	-0.25712	0.0758209	-0.0362008	-0.549439
										AT5G18404	hypothetical protein	-0.462595	-0.420843	-0.770806	-0.864527	-0.699349	-0.977457	-0.936781	-1.47443
										AT5G18670	BMY3 (BETA-AMYLASE 9); beta-amylase	-0.585691	-0.609326	-0.626738	-1.23444	-0.636735	-0.623865	-0.996497	-1.15224
										AT5G19120	aspartic-type endopeptidase/ pepsin A	-0.144817	-0.265425	-0.547095	-1.04715	-0.249986	-0.342597	-0.746533	-0.975002
										AT5G19470	ATNUDT24 (Arabidopsis thaliana Nudix hydrolase homolog 24); hydrolase	1.24517	1.98603	4.51412	7.04412	4.3405	4.75914	5.59584	6.67048
										AT5G19520	mechanosensitive ion channel domain-containing protein / MS ion channel domain-containing protein	-0.954688	-0.782853	-1.45512	-1.33855	-0.78701	-0.716348	-0.444762	-0.787121
										AT5G19600	SULTR3;5; sulfate transmembrane transporter	-0.496232	-0.312329	-0.989361	-1.20466	-0.640358	-0.433817	-0.369705	-0.310812
										AT5G19890	peroxidase, putative	-0.878612	-0.968213	-1.78244	-2.28464	-1.1256	-1.47506	-1.69115	-1.49419
										AT5G20250	DIN10 (DARK INDUCIBLE 10); hydrolase, hydrolyzing O-glycosyl compounds	-1.07005	-1.02272	-1.44866	-1.90408	-0.163733	-0.559658	-1.0481	-0.711874
										AT5G20450	hypothetical protein	0.508483	0.584961	0.832409	0.731925	-0.0254018	-0.145619	0.0559829	-0.679133
										AT5G20635	hypothetical protein	-0.282501	-0.31358	-0.972904	-1.67689	-0.667005	-0.688155	-0.722507	-1.22709
										AT5G20640	hypothetical protein	-0.73841	-0.863244	-1.49512	-1.81043	-1.38828	-1.68986	-1.84001	-1.50572
										AT5G20670	hypothetical protein	0.904132	0.695167	1.35235	1.70401	1.96169	1.47798	1.69298	1.79974
										AT5G20700	senescence-associated protein-related	0.396557	0.598344	1.16221	1.37382	0.0640425	0.241919	0.428044	-0.165498
										AT5G20710	BGAL7 (beta-galactosidase 7); beta-galactosidase	0.912965	0.73001	1.25626	1.11454	0.405269	0.944824	0.639817	1.14841
										AT5G21120	EIL2 (ETHYLENE-INSENSITIVE3-LIKE 2); transcription factor	-0.316872	-0.855253	-1.92811	-2.22814	-0.605899	-0.389293	-1.177	-0.660239
										AT5G21170	5'-AMP-activated protein kinase beta-2 subunit, putative	-0.0658707	-0.320128	-0.500479	-0.950347	-0.0297519	0.0615558	-0.343109	-0.446413
										AT5G22300	NIT4 (NITRILASE 4)	-1.51633	-1.92773	-1.323	-0.408041	-0.587863	-1.03514	-0.458454	-0.337614
										AT5G22355	DC1 domain-containing protein	0.585023	0.417611	0.981327	1.20789	1.27597	2.15198	1.98419	2.24281
										AT5G22410	peroxidase, putative	-0.717817	-1.40197	-1.63911	-1.99126	-0.415957	-0.264883	-0.884662	-1.14849
										AT5G22460	esterase/lipase/thioesterase family protein	0.660116	0.567211	1.28389	1.8505	2.49838	2.1643	2.13063	2.8048
										AT5G22520	hypothetical protein	0.785215	0.772098	0.938906	0.474944	0.103801	1.67576	0.628626	1.45565
										AT5G22570	WRKY38 (WRKY DNA-binding protein 38); transcription factor	1.93203	2.97884	1.99349	1.13073	0.370531	3.7042	1.93969	3.27865
										AT5G22870	harpin-induced protein-related / HIN1-related / harpin-responsive protein-related	-0.335816	-0.508137	-1.13696	-1.52596	-0.275902	-0.472037	-0.529333	-0.705747
										AT5G22890	zinc finger (C2H2 type) family protein	1.25737	1.99921	3.14722	3.73739	1.53071	2.21327	3.08317	3.11003
										AT5G22920	zinc finger (C3HC4-type RING finger) family protein	-0.53677	-0.626099	-0.828906	-1.18971	-0.104231	-0.208676	-0.542254	-0.786734
										AT5G23010	MAM1 (2-isopropylmalate synthase 3); 2-isopropylmalate synthase	0.45822	0.579948	0.691328	0.780262	0.906561	0.950168	0.914976	1.52552
										AT5G23020	IMS2/MAM-L/MAM3 (METHYLTHIOALKYMALATE SYNTHASE-LIKE); 2-isopropylmalate synthase/ methylthioalkylmalate synthase	-0.582492	-0.53508	-0.962852	-1.02294	-0.556205	-0.869638	-1.06355	-0.76512
										AT5G23220	NIC3 (NICOTINAMIDASE 3); catalytic/ nicotinamidase	0.390665	0.503716	1.21796	1.51752	0.258317	1.31152	1.25846	1.20583
										AT5G23370	GRAM domain-containing protein / ABA-responsive protein-related	-1.44292	-1.1998	-0.755112	-0.971415	-0.571422	-0.860881	-0.510209	-1.71275
										AT5G23730	nucleotide binding	-1.09361	-0.51115	-0.414939	-0.130389	-0.521502	-1.144	-0.590044	-1.48462
										AT5G23820	MD-2-related lipid recognition domain-containing protein / ML domain-containing protein	0.814417	0.594704	1.47026	1.91838	0.630655	0.974481	0.873625	1.53917
										AT5G23903	hypothetical protein	-1.06045	-1.04762	-1.10346	-1.36496	-1.44302	-1.66488	-2.03369	-1.23305
										AT5G24090	acidic endochitinase (CHIB1)	0.114734	0.157285	0.741583	1.29944	0.804175	0.97447	1.10311	1.50729
										AT5G24120	SIGE (RNA polymerase sigma subunit E); DNA binding / DNA-directed RNA polymerase/ sigma factor/ transcription factor	-0.663984	-0.827208	-0.664427	-0.637199	-0.477528	-0.776876	-1.15676	-0.567027
										AT5G24155	squalene monooxygenase, putative / squalene epoxidase, putative	0.287917	0.469469	0.873784	0.75407	1.13065	1.00293	0.72164	0.77506
										AT5G24190	hypothetical protein	-0.788523	-1.28213	-1.30705	-1.46559	-0.563646	-0.385767	-1.38088	-1.13614
										AT5G24280	ATP binding	0.178664	0.474455	1.04399	1.19746	0.414419	0.391363	0.610536	0.707905
										AT5G24470	APRR5 (PSEUDO-RESPONSE REGULATOR 5); transcription regulator	-1.06702	-0.857367	-0.785416	-0.972365	-0.916994	-1.72767	-1.58104	-1.73503
										AT5G24580	copper-binding family protein	-0.361505	-0.428683	-0.940925	-1.34034	-0.355494	-0.172824	-0.117943	-0.289737
										AT5G24770	VSP2 (VEGETATIVE STORAGE PROTEIN 2); acid phosphatase	1.23225	2.37488	3.51522	3.22435	2.84952	1.51947	1.8273	1.68672
										AT5G24780	VSP1 (VEGETATIVE STORAGE PROTEIN 1)	0.468941	1.11119	3.95328	5.3469	3.1156	2.25118	1.89243	2.82375
										AT5G24850	CRY3 (CRYPTOCHROME 3); DNA binding / DNA photolyase/ FMN binding	-0.431163	-0.524375	-0.879372	-1.05529	-0.700806	-0.374458	-0.377397	-0.370723
										AT5G24960	CYP71A14 (cytochrome P450, family 71, subfamily A, polypeptide 14); oxygen binding	-0.305574	-0.149769	-1.11057	-1.39346	-0.875701	-0.637419	-0.693994	-1.13284
										AT5G25130	CYP71B12 (cytochrome P450, family 71, subfamily B, polypeptide 12); oxygen binding	0.952331	1.06106	1.39038	1.44043	0.662913	0.42138	0.0818844	0.309295
										AT5G25190	ethylene-responsive element-binding protein, putative	1.36461	2.08691	2.84356	2.99943	1.37646	1.41278	1.91205	1.93824
										AT5G25220	KNAT3 (KNOTTED1-LIKE HOMEOBOX GENE 3); transcription factor	0.282514	0.380674	0.414656	0.199722	0.27482	0.457334	0.382472	0.519731
										AT5G25260	hypothetical protein	1.03417	1.4184	1.44529	1.89996	0.677597	1.55452	0.736614	1.26452
										AT5G25390	SHN2 (SHINE2); DNA binding / transcription factor	0.950559	0.689701	1.47268	1.69186	1.22899	1.78576	1.63498	1.81294
										AT5G25470	DNA binding	0.778038	0.596643	0.620257	0.849785	1.20149	1.97246	2.3347	2.84967
										AT5G25530	DNAJ heat shock protein, putative	2.8902	2.83321	3.06462	2.82502	2.16842	1.9599	2.38012	1.52752
										AT5G25610	RD22 (RESPONSIVE TO DESSICATION 22)	0.631209	0.671422	1.24841	1.47581	1.4671	1.33173	1.48345	1.51988
										AT5G25810	TNY (TINY); DNA binding / transcription factor	-0.615395	-0.575175	-0.731656	-1.12563	-0.679279	-1.00413	-0.768006	-1.33259
										AT5G25890	IAA28 (IAA-ALANINE RESISTANT 2); transcription factor	-0.786488	-0.787075	-1.01158	-1.1055	-0.818403	-0.932878	-1.21328	-1.07278
										AT5G26140	lysine decarboxylase family protein	1.02369	1.34063	0.876941	1.11352	1.34976	2.20813	1.97071	1.40656
										AT5G26146	misc_RNA	1.59221	1.22244	0.723111	1.26458	1.16125	3.38326	3.47441	4.3318
										AT5G26250	sugar transporter, putative	0.720219	1.22891	1.83404	2.15708	0.943132	1.21375	1.32811	1.25295
										AT5G26300	meprin and TRAF homology domain-containing protein / MATH domain-containing protein	-0.423762	-1.15388	-2.25993	-3.40207	-2.19985	-2.52753	-3.38483	-3.05819
										AT5G26320	meprin and TRAF homology domain-containing protein / MATH domain-containing protein	-0.701657	-1.44714	-2.13441	-2.99397	-1.09733	-0.563626	-1.45861	-1.05262
										AT5G26620	hypothetical protein	-0.574583	-0.573672	-0.939926	-1.49215	-0.406535	-0.860462	-1.06259	-1.31967
										AT5G26820	ferroportin-related	-0.488552	-0.526801	-0.747065	-1.22303	-0.663566	-0.525146	-0.597098	-0.851287
										AT5G27000	ATK4 (ARABIDOPSIS THALIANA KINESIN 4); microtubule motor	-0.407751	-0.574451	-1.1822	-1.76081	-0.848386	-0.679955	-1.03429	-1.06928
										AT5G27230	hypothetical protein	-0.466936	-0.570323	-0.725245	-0.828775	-0.797556	-0.688039	-0.347354	-1.14664
										AT5G27290	hypothetical protein	-0.340723	-0.626422	-0.856239	-1.21917	-0.290443	-0.462478	-0.8696	-1.10629
										AT5G27550	pseudo	-0.391121	-0.131527	-0.454096	-0.887128	-0.584232	-0.771511	-0.471574	-1.30006
										AT5G27920	F-box family protein	-0.379439	-0.606042	-0.519735	-1.12561	-0.648167	-0.237492	-0.372194	-0.317983
										AT5G28490	LSH1 (LIGHT-DEPENDENT SHORT HYPOCOTYLS 1)	-0.214168	-0.238354	-0.627491	-1.81761	-0.712616	-1.07393	-1.46323	-1.76599
										AT5G28510	glycosyl hydrolase family 1 protein	1.09804	1.92576	2.0766	2.76749	1.57353	1.74074	1.63452	1.80287
										AT5G28630	glycine-rich protein	-1.11859	-0.899141	-1.02838	-1.37985	-1.5794	-1.64414	-1.73872	-2.18633
										AT5G28770	BZO2H3 (ARABIDOPSIS THALIANA BASIC LEUCINE ZIPPER 63); DNA binding / transcription factor	-1.12742	-0.972303	-1.14909	-1.36785	-0.483973	-1.06646	-0.965999	-1.83305
										AT5G35490	hypothetical protein	-0.34317	-1.12943	-1.76578	-2.8436	-0.489175	-0.679964	-1.49843	-2.33788
										AT5G35796	pseudo	-0.164257	-0.466598	-0.611842	-1.14831	-0.629294	-0.178492	-0.525197	-0.60887
										AT5G36910	THI2 (THIONIN 2); toxin receptor binding	-0.250021	-0.560855	-0.61586	-1.02259	-0.206977	-0.789555	-0.895412	-0.0765251
										AT5G38120	4-coumarate--CoA ligase family protein / 4-coumaroyl-CoA synthase family protein	3.26261	3.57032	6.04812	5.53572	2.72673	1.53507	1.70494	1.39801
										AT5G38140	histone-like transcription factor (CBF/NF-Y) family protein	-0.672308	-0.960543	-1.47632	-1.37683	-0.44655	-0.72073	-0.437037	-0.766753
										AT5G38150	PMI15 (plastid movement impaired 15)	-0.220985	-0.545277	-0.888278	-1.33106	-0.49497	-0.507438	-0.676799	-0.603278
										AT5G38240	serine/threonine protein kinase, putative	0.503402	0.946791	1.87194	1.9579	0.959194	1.17204	1.07295	1.62935
										AT5G38310	hypothetical protein	1.47576	1.29143	1.94986	1.72786	2.20612	2.22568	2.4508	2.1003
										AT5G38550	jacalin lectin family protein	-0.142542	-0.359987	-0.635568	-1.34008	-0.511557	-0.356378	-0.70587	-0.304582
										AT5G38700	hypothetical protein	1.45266	1.28898	1.26663	0.925653	0.913231	0.707082	0.575368	0.333643
										AT5G38780	S-adenosyl-L-methionine:carboxyl methyltransferase family protein	0.887443	0.975945	1.67675	2.24959	0.448357	0.945858	1.04877	1.31037
										AT5G38790	hypothetical protein	-0.231883	-0.481871	-0.919051	-1.11954	-0.728998	-0.409278	-0.8393	-0.820068
										AT5G38940	manganese ion binding / metal ion binding / nutrient reservoir	-0.391132	-0.503234	-0.681604	-0.622511	-1.62699	-1.05115	-0.938486	-1.02916
										AT5G39050	transferase family protein	0.469992	0.669305	1.45689	1.84102	0.345749	0.407322	0.700157	0.739045
										AT5G39080	transferase family protein	0.795913	0.639918	1.15933	1.63666	0.462796	0.416537	0.44525	0.775378
										AT5G39150	germin-like protein, putative	-1.34497	-1.43809	-1.44312	-1.19206	-0.953333	-0.903747	-0.952979	-0.408863
										AT5G39180	germin-like protein, putative	-1.36565	-1.37884	-1.41641	-1.24758	-1.01143	-0.801605	-0.926285	-0.445539
										AT5G39320	UDP-glucose 6-dehydrogenase, putative	-0.0820621	-0.211894	-0.416989	-0.467592	-0.0674609	-0.124221	-0.124423	-0.230236
										AT5G39480	F-box family protein	-1.11773	-1.48448	-2.50532	-3.58537	-1.90876	-1.89677	-2.88438	-2.05833
										AT5G39820	ANAC094 (Arabidopsis NAC domain containing protein 94); transcription factor	-1.01475	-0.909625	-1.39475	-2.25198	-0.720344	-0.926862	-0.547918	-1.64433
										AT5G39970	catalytic	-0.756122	-0.851421	-1.07367	-1.37687	-0.722255	-0.581458	-0.978262	-0.889047
										AT5G40210	nodulin MtN21 family protein	0.563099	0.743899	1.19216	1.13412	0.779143	0.491564	0.532265	0.69674
										AT5G40380	protein kinase family protein	0.489927	1.06289	1.45055	1.23331	0.587282	1.131	0.947731	0.361822
										AT5G40382	cytochrome-c oxidase	1.04352	1.18334	1.80969	1.99608	2.27951	1.72559	2.34515	2.43364
										AT5G40450	hypothetical protein	-0.867315	-2.01322	-1.74746	-2.07539	-0.819933	-1.18312	-1.621	-2.43741
										AT5G40451	hypothetical protein	-0.952628	-1.81889	-1.62729	-1.76386	-0.858476	-1.21906	-1.1746	-2.5625
										AT5G40690	hypothetical protein	-0.288424	-0.56081	-0.799686	-1.38053	-0.504572	-0.124204	-0.8001	-0.784696
										AT5G40720	hypothetical protein	0.551305	0.387769	0.507453	1.04227	0.915357	1.06465	0.728435	1.38594
										AT5G40780	LHT1 (LYSINE HISTIDINE TRANSPORTER 1); amino acid transmembrane transporter	0.299684	0.366716	0.650386	1.05593	0.296229	0.318921	0.237408	0.624606
										AT5G40790	hypothetical protein	2.34282	2.5732	4.44509	4.78324	2.77197	3.48412	3.72197	4.67673
										AT5G40800	hypothetical protein	3.87047	4.27361	4.92405	4.68194	4.16105	4.89565	4.902	5.40299
										AT5G40990	GLIP1 (GDSL LIPASE1); carboxylesterase	-6.36761	-5.82338	-6.01876	-5.89657	-4.24701	-4.78844	-3.71463	-2.23022
										AT5G41040	transferase family protein	-0.939267	-0.443849	-0.0951913	-0.363149	-0.509161	-1.25771	-0.680239	-1.98438
										AT5G41080	glycerophosphoryl diester phosphodiesterase family protein	-1.81543	-2.1671	-3.06383	-3.98265	-0.356508	-0.220976	-0.465805	-0.803599
										AT5G41380	hypothetical protein	1.01966	1.08333	1.22102	1.33827	0.904497	1.65075	1.83048	2.24389
										AT5G41460	fringe-related protein	0.76352	0.816019	1.16052	1.40596	0.967461	0.581996	0.501167	1.03478
										AT5G41590	hypothetical protein	-0.960839	-1.41705	-1.53424	-1.67626	-1.32071	-0.840117	-1.39047	-1.03524
										AT5G41610	ATCHX18 (cation/hydrogen exchanger 18); monovalent cation:proton antiporter	0.385112	0.634728	0.887471	1.07709	0.152399	0.475161	0.790759	0.80592
										AT5G41710	pseudo	-1.16391	-0.56865	-0.979065	-1.40336	-0.568167	-0.567714	-0.377182	-1.17704
										AT5G42010	WD-40 repeat family protein	-0.513233	-0.262566	-0.205602	-0.219558	-0.849546	-0.845661	-1.01226	-0.675519
										AT5G42040	RPN12B (REGULATORY PARTICLE NON-ATPASE 12B); peptidase	0.587909	0.509907	0.532277	1.104	0.967236	0.857365	0.84269	1.26716
										AT5G42110	hypothetical protein	0.8855	1.09087	1.19567	1.46258	0.900858	0.686365	1.18433	0.443205
										AT5G42250	alcohol dehydrogenase, putative	-0.727466	-0.97312	-1.1245	-1.49819	-1.07418	-0.724893	-1.44062	-1.03822
										AT5G42380	CML37/CML39; calcium ion binding	0.197491	0.405387	1.22786	1.3499	0.242573	0.920272	0.48097	0.564183
										AT5G42630	ATS/KAN4 (ABERRANT TESTA SHAPE); DNA binding / transcription factor	-0.37058	-0.430574	-0.973776	-1.09562	-0.0988153	-0.392156	-0.224159	-0.549836
										AT5G42680	hypothetical protein	0.739275	0.971001	1.08257	0.834872	0.31086	0.234316	0.132492	0.13806
										AT5G42690	hypothetical protein	-0.58166	-0.566574	-0.747094	-0.903685	-0.38111	-0.645655	-0.458588	-1.42211
										AT5G42760	hypothetical protein	0.595015	0.453913	0.969323	1.47324	0.41177	0.420034	0.261244	0.681844
										AT5G42800	DFR (DIHYDROFLAVONOL 4-REDUCTASE); dihydrokaempferol 4-reductase	2.19574	3.048	5.02362	5.78234	2.54362	2.69701	3.88456	4.77225
										AT5G42830	transferase family protein	-0.355897	-0.351411	-0.291323	-0.349779	-1.0563	-0.427921	-0.840857	-0.618719
										AT5G43030	DC1 domain-containing protein	-0.245351	-0.451563	-1.01762	-1.19135	-0.2695	-0.391354	-0.423823	-0.623605
										AT5G43290	WRKY49 (WRKY DNA-binding protein 49); transcription factor	1.15694	0.84775	0.849158	0.354923	0.886686	1.21914	0.918213	0.519388
										AT5G43300	glycerophosphodiester phosphodiesterase	1.78583	1.94849	1.74623	1.4976	2.69346	2.52381	2.39716	2.00959
										AT5G43520	DC1 domain-containing protein	-0.19441	-0.516392	-0.815658	-1.20274	-0.736409	-0.681355	-1.25887	-1.31293
										AT5G43570	serine-type endopeptidase inhibitor	1.14303	1.06828	1.00292	1.11858	0.686578	1.01304	0.974944	1.12987
										AT5G43780	APS4	-0.572788	-0.633312	-0.771657	-0.753868	0.0157315	-0.333945	-0.568902	-0.26954
										AT5G43840	AT-HSFA6A (Arabidopsis thaliana heat shock transcription factor A6A); DNA binding / transcription factor	4.37007	3.3603	4.76815	5.89121	5.21757	5.82515	6.47912	6.70278
										AT5G43990	SUVR2; histone-lysine N-methyltransferase/ zinc ion binding	0.531708	0.433298	0.217101	0.239029	0.402708	0.574324	0.413808	1.09992
										AT5G44005	hypothetical protein	0.483575	0.64276	1.31981	1.60437	0.496037	0.417629	0.395869	0.0674155
										AT5G44060	hypothetical protein	-0.111294	-0.13859	-0.269191	-0.754503	-0.491603	-0.480127	-0.508085	-0.600988
										AT5G44120	CRA1 (CRUCIFERINA); nutrient reservoir	1.57198	2.6819	2.13538	3.49595	1.07466	2.39219	7.78129	4.80254
										AT5G44260	zinc finger (CCCH-type) family protein	-1.3013	-1.33629	-1.65325	-2.31131	-0.662521	-0.701592	-1.01649	-1.27872
										AT5G44310	late embryogenesis abundant domain-containing protein / LEA domain-containing protein	3.55476	3.46144	2.86048	6.70325	3.42829	3.50912	5.12972	6.02744
										AT5G44340	TUB4 (tubulin beta-4 chain)	-0.251949	-0.19901	-0.160548	-0.287025	-0.380939	-0.786763	-0.393698	-1.37459
										AT5G44420	PDF1 (Low-molecular-weight cysteine-rich 77)	-0.577549	-2.56005	-5.54596	-5.97827	-4.5056	-3.39135	-2.65622	-1.41858
										AT5G44430	PDF1c (plant defensin 1c)	-1.04461	-2.21576	-2.95542	-2.50388	-2.70267	-2.24828	-2.02153	-1.94632
										AT5G44562	misc_RNA	-1.46371	-1.68152	-2.25285	-2.45683	-1.61418	-1.55075	-2.45162	-1.42021
										AT5G44568	hypothetical protein	0.776582	1.14597	1.23211	1.08051	0.467537	1.74176	1.41782	1.55947
										AT5G44570	hypothetical protein	0.870314	1.2253	1.62464	1.02027	0.502868	1.23406	0.901328	0.297557
										AT5G44572	hypothetical protein	0.368486	0.308002	0.828648	0.872872	1.312	1.57692	1.41871	1.4822
										AT5G44575	hypothetical protein	0.950193	1.07226	1.89644	2.44764	1.00671	1.51774	1.76651	2.51896
										AT5G44578	hypothetical protein	0.813014	1.00908	0.755274	0.362651	0.399613	0.893981	0.930884	0.953953
										AT5G44580	hypothetical protein	0.343711	0.141324	0.377417	0.731735	0.906695	1.00265	0.955477	0.987375
										AT5G44585	hypothetical protein	-1.42345	-1.70287	-2.27174	-2.2111	-0.929747	-0.725728	-0.729984	-1.38894
										AT5G44610	MAP18 (MICROTUBULE-ASSOCIATED PROTEIN 18); microtubule binding	-0.419236	-0.666112	-1.04068	-1.43197	-0.174915	-0.227253	-0.883222	-0.850517
										AT5G44973	hypothetical protein	-0.439612	-2.23999	-3.1887	-4.14729	-0.213451	-1.13878	-2.60965	-2.92616
										AT5G45220	Toll-Interleukin-Resistance (TIR) domain-containing protein	-0.717372	-0.857097	-1.23702	-1.46975	-0.873729	-1.54174	-1.72719	-1.69072
										AT5G45350	proline-rich family protein	0.341106	0.405333	0.505567	0.884626	0.767862	0.517527	0.357569	0.654334
										AT5G45630	hypothetical protein	1.23258	0.998878	1.19914	1.96908	0.674865	1.34623	0.95093	1.1288
										AT5G45670	GDSL-motif lipase/hydrolase family protein	0.443973	0.742149	0.953044	0.944094	0.350431	0.161773	0.0844538	0.303563
										AT5G45820	CIPK20 (CBL-INTERACTING PROTEIN KINASE 20); kinase	-2.51213	-2.93884	-2.74964	-2.50684	-2.47495	-4.52693	-4.71905	-4.66759
										AT5G45830	DOG1 (DELAY OF GERMINATION 1)	-1.73671	-2.33753	-2.2889	-2.44114	-1.62538	-2.81097	-2.74312	-2.64259
										AT5G46040	proton-dependent oligopeptide transport (POT) family protein	-1.45906	-1.63967	-2.07788	-1.99119	-1.33505	-1.78273	-2.42485	-2.40248
										AT5G46060	hypothetical protein	-0.382284	-0.628851	-1.00313	-1.56993	-0.669815	-0.768492	-1.33518	-1.57232
										AT5G46090	hypothetical protein	-0.381074	-0.596908	-0.965214	-2.20779	-0.317749	-0.510236	-1.51154	-1.75083
										AT5G46110	APE2 (ACCLIMATION OF PHOTOSYNTHESIS TO ENVIRONMENT); triose-phosphate transmembrane transporter	-0.444929	-0.193842	-0.215873	-0.742257	-0.540023	-0.807706	-0.417558	-1.59808
										AT5G46490	disease resistance protein (TIR-NBS class), putative	0.358479	0.349544	0.61041	0.668081	0.727912	0.627593	0.34028	0.664271
										AT5G46830	basic helix-loop-helix (bHLH) family protein	2.52822	2.7248	2.76741	2.21537	0.725438	1.09998	1.10916	1.69046
										AT5G47130	Bax inhibitor-1 family / BI-1 family	-1.75957	-2.15051	-2.23598	-1.98493	-0.657282	-1.15922	-0.82947	-1.45072
										AT5G47150	YDG/SRA domain-containing protein	1.12032	1.08848	1.5085	1.63245	0.525029	0.84083	0.743177	1.02792
										AT5G47240	ATNUDT8 (Arabidopsis thaliana Nudix hydrolase homolog 8); hydrolase	-1.00737	-1.25253	-0.835061	-1.25639	-0.448682	-0.810897	-1.03927	-1.05394
										AT5G47330	palmitoyl protein thioesterase family protein	0.950601	1.27741	2.395	2.79451	1.38244	0.52771	0.475993	0.688345
										AT5G47740	hypothetical protein	0.39356	0.316763	0.400904	0.156674	0.535163	0.921476	0.643735	1.03552
										AT5G48270	hypothetical protein	1.49514	1.53651	1.89059	1.18498	1.87958	2.17682	1.98447	2.03702
										AT5G48390	binding	0.626684	0.771799	0.733741	0.899999	0.509059	0.981949	1.2609	1.63418
										AT5G48430	aspartic-type endopeptidase/ pepsin A	-0.98218	-0.647813	-0.981014	-0.823613	-0.665307	-1.6628	-1.70088	-2.06269
										AT5G48485	DIR1 (DEFECTIVE IN INDUCED RESISTANCE 1); lipid binding	-0.0684417	-0.320102	-0.750635	-1.32541	-0.240058	-0.522721	-0.84191	-1.00652
										AT5G48510	speckle-type POZ protein-related	2.99906	3.07682	3.27303	3.22401	2.63633	3.0465	2.5739	2.03859
										AT5G48920	hydroxyproline-rich glycoprotein family protein	-0.53168	-0.625203	-1.33106	-1.76428	-0.0701152	-0.101428	-0.450962	-0.327252
										AT5G49040	disease resistance-responsive protein-related / dirigent protein-related	1.54594	2.01522	2.37975	2.59223	1.60383	1.98206	2.0087	2.03966
										AT5G49080	pseudo	-0.283078	-0.567156	-1.61911	-2.0498	-0.167983	-0.412123	-1.02543	-1.01766
										AT5G49525	hypothetical protein	0.80873	0.611141	1.09913	1.06766	1.27092	1.56009	1.23943	1.37384
										AT5G49620	AtMYB78 (myb domain protein 78); DNA binding / transcription factor	-0.493613	-0.94117	-1.58222	-1.9948	-0.734628	-0.431956	-1.26813	-1.46449
										AT5G49630	AAP6 (AMINO ACID PERMEASE 6); amino acid transmembrane transporter	-0.642572	-0.596054	-0.746848	-1.07542	-1.04239	-1.24452	-1.30684	-1.20933
										AT5G49730	ATFRO6/FRO6 (FERRIC REDUCTION OXIDASE 6); ferric-chelate reductase/ oxidoreductase	-0.288531	-0.947213	-1.38146	-1.40363	-0.188538	-0.958557	-1.42978	-1.35189
										AT5G49740	ATFRO7/FRO7 (FERRIC REDUCTION OXIDASE 7); ferric-chelate reductase/ oxidoreductase	-0.35936	-0.945712	-1.26542	-1.58435	-0.451314	-1.08509	-1.59781	-1.79126
										AT5G49770	leucine-rich repeat transmembrane protein kinase, putative	-1.17351	-1.44305	-2.31102	-2.56588	-2.03241	-2.08576	-2.76399	-2.52881
										AT5G50120	transducin family protein / WD-40 repeat family protein	-0.444693	-0.57636	-0.668918	-1.02511	-0.565695	-0.659645	-0.626808	-0.701812
										AT5G50140	ankyrin repeat family protein	-1.31517	-1.64775	-2.32523	-2.76905	-3.2178	-3.50216	-4.91098	-5.44059
										AT5G50240	PIMT2 (PROTEIN-L-ISOASPARTATE METHYLTRANSFERASE 2); protein-L-isoaspartate (D-aspartate) O-methyltransferase	0.756838	0.629003	0.634249	0.746074	1.32345	1.36571	1.18437	1.40645
										AT5G50300	xanthine/uracil/vitamin C permease family protein	-1.53331	-0.322916	-0.773334	-0.113205	-0.789916	-1.90815	-0.184874	-2.70372
										AT5G50335	hypothetical protein	2.30973	2.25179	2.96539	2.83194	1.49474	2.37025	2.78897	3.35112
										AT5G50360	hypothetical protein	2.57397	2.15902	3.37262	4.88962	2.94336	3.63765	3.80512	4.43378
										AT5G50400	ATPAP27/PAP27 (purple acid phosphatase 27); acid phosphatase/ protein serine/threonine phosphatase	-0.490083	-0.216814	-0.391645	-0.60338	-0.171537	-0.754725	-0.558492	-1.23538
										AT5G50720	ATHVA22E (Arabidopsis thaliana HVA22 homologue E)	0.573325	0.586823	0.667209	0.908362	1.15202	1.10645	1.1928	1.07573
										AT5G50750	RGP4; alpha-1,4-glucan-protein synthase (UDP-forming)	1.77448	1.70966	1.78509	0.923337	1.35603	2.06326	1.69113	1.65173
										AT5G50790	nodulin MtN3 family protein	-2.49994	-2.23576	-2.26735	-1.77331	-2.35731	-3.94067	-3.59622	-3.70333
										AT5G50820	ANAC097 (Arabidopsis NAC domain containing protein 97); transcription factor	-0.414027	-0.678708	-1.03287	-1.25569	-0.330017	-0.526036	-0.523912	-0.315838
										AT5G50915	basic helix-loop-helix (bHLH) family protein	0.868044	1.65732	2.0808	1.98991	0.824285	0.713207	0.799938	0.850959
										AT5G51060	RHD2 (ROOT HAIR DEFECTIVE 2)	-0.389155	-0.435024	-0.925312	-1.37744	-0.765659	-0.634448	-0.884982	-1.1798
										AT5G51490	pectinesterase family protein	-0.228152	-0.369398	-1.73263	-1.99528	-0.595269	-0.257636	-0.679997	-1.09745
										AT5G51720	hypothetical protein	-0.571592	-0.852612	-0.703067	-1.16908	-0.372493	-0.348932	-0.268324	-0.868793
										AT5G51780	basix helix-loop-helix (bHLH) family protein	-1.57342	-2.66343	-2.08654	-1.84241	-0.657636	-0.190122	-0.829967	-0.756705
										AT5G52170	HDG7 (HOMEODOMAIN GLABROUS7); DNA binding / sequence-specific DNA binding / transcription factor	-0.601966	-0.374885	-1.41636	-2.02628	-0.903313	-0.50499	-0.372475	-0.916428
										AT5G52250	transducin family protein / WD-40 repeat family protein	-1.1341	-1.32248	-1.5362	-1.6189	-1.10003	-1.11585	-1.27094	-1.39918
										AT5G52300	LTI65/RD29B (RESPONSIVE TO DESSICATION 29B)	2.83364	1.95236	2.82091	4.77516	5.78486	6.118	6.1973	7.46187
										AT5G52310	COR78 (COLD REGULATED 78)	1.67968	1.41516	1.97953	2.44773	2.27606	2.49687	2.26544	2.6291
										AT5G52320	CYP96A4 (cytochrome P450, family 96, subfamily A, polypeptide 4); oxygen binding	1.10721	0.707224	1.4822	1.47429	0.671928	0.941007	0.644198	1.30837
										AT5G52350	ATEXO70A3 (exocyst subunit EXO70 family protein A3); protein binding	-3.35244	-3.45706	-3.46011	-3.46073	-3.47383	-3.46352	-3.46347	-3.46393
										AT5G52390	photoassimilate-responsive protein, putative	2.14651	2.28536	2.60724	2.74021	1.06569	1.9342	2.74773	2.86037
										AT5G52710	heavy-metal-associated domain-containing protein	-2.38003	-0.943607	-2.57063	-2.41814	-2.36611	-4.04731	-3.77289	-3.42793
										AT5G52760	heavy-metal-associated domain-containing protein	1.17964	1.60817	1.51085	0.953153	0.604277	2.10517	1.02035	1.30262
										AT5G52790	CBS domain-containing protein-related	1.03131	0.791306	0.960633	0.62508	0.752922	1.90706	1.40978	1.90619
										AT5G52882	ATP binding / nucleoside-triphosphatase/ nucleotide binding	-0.741356	-0.582142	-0.667772	-0.909617	-1.06402	-1.3594	-1.22614	-1.43127
										AT5G52940	hypothetical protein	-0.763075	-1.43563	-1.75532	-2.21045	-1.19612	-1.06627	-1.83379	-1.63079
										AT5G53048	misc_RNA	2.1223	1.0594	0.802047	0.257558	1.1937	1.93068	1.29634	1.44933
										AT5G53120	SPDS3 (SPERMIDINE SYNTHASE 3)	0.627548	0.898527	1.08092	1.13047	0.671179	0.848419	0.791569	0.978784
										AT5G53390	hypothetical protein	1.95398	3.02243	3.62143	3.76684	1.75267	2.47123	3.22207	3.72299
										AT5G53480	importin beta-2, putative	-0.540072	-0.337135	-0.485615	-0.66374	-0.55639	-0.85336	-0.446926	-1.38061
										AT5G53870	plastocyanin-like domain-containing protein	0.323453	0.428693	1.1401	0.802104	0.893453	1.06962	0.68517	0.54479
										AT5G53905	hypothetical protein	-1.05182	-1.29339	-1.02643	-1.43076	-1.19773	-1.56091	-1.36371	-1.17836
										AT5G53980	ATHB52 (ARABIDOPSIS THALIANA HOMEOBOX PROTEIN 52); transcription factor	0.94818	1.33416	1.05496	0.984479	0.606852	0.985281	0.645181	1.02459
										AT5G54045	pseudo	2.43833	3.41159	5.05365	5.89643	2.73012	3.06344	3.86336	5.30798
										AT5G54060	UF3GT (UDP-GLUCOSE:FLAVONOID 3-O-GLUCOSYLTRANSFERASE); transferase, transferring glycosyl groups	2.09629	2.93042	4.54931	5.51359	2.39077	2.62711	3.69494	4.91157
										AT5G54130	calcium-binding EF hand family protein	-0.470688	-0.430586	-0.835732	-1.22974	-1.01242	-0.834365	-1.00977	-1.19656
										AT5G54165	hypothetical protein	1.24383	0.967171	1.40007	1.4989	0.654021	1.36031	0.818908	1.14927
										AT5G54170	hypothetical protein	0.447245	0.637284	1.22077	1.19457	0.100721	0.182696	-0.017851	0.0235045
										AT5G54700	ankyrin repeat family protein	-0.188732	-0.575738	-1.27396	-3.18076	-1.17581	-0.552597	-1.35257	-2.21069
										AT5G54960	PDC2 (PYRUVATE DECARBOXYLASE-2); pyruvate decarboxylase	-0.503692	-0.448695	-0.412684	-0.467663	-0.256519	-0.803305	-1.02035	-0.820693
										AT5G55370	long-chain-alcohol O-fatty-acyltransferase family protein / wax synthase family protein	1.20378	1.6274	1.71017	2.12663	1.85023	1.64977	1.85767	2.05486
										AT5G55560	protein kinase family protein	0.318407	0.267771	0.415277	0.531286	0.181322	0.51094	0.413681	1.04302
										AT5G55650	hypothetical protein	-0.583744	-0.138025	-0.677744	-1.48987	-0.460927	-0.487779	-0.108835	-1.27428
										AT5G56080	nicotianamine synthase, putative	0.631661	1.11596	2.3323	2.72519	0.356713	0.851264	1.03573	1.8491
										AT5G56320	ATEXPA14 (ARABIDOPSIS THALIANA EXPANSIN A14)	-0.590061	-0.299276	-1.00242	-0.677661	-0.814471	-0.742645	-0.116532	-1.11493
										AT5G56550	hypothetical protein	-0.110554	-0.483442	-0.733583	-1.79689	-0.803877	-0.681959	-1.2664	-1.72203
										AT5G56810	F-box family protein	-1.96594	-2.72801	-3.24712	-3.54052	-0.789126	-1.42264	-1.39305	-1.54858
										AT5G56840	DNA-binding family protein	-1.19268	-1.48192	-1.52381	-1.90379	-2.01599	-2.23684	-2.25178	-2.03629
										AT5G56870	BGAL4 (beta-galactosidase 4); beta-galactosidase	-1.05464	-1.31544	-1.05293	-0.330762	-0.100266	-1.00769	-0.867109	-1.87876
										AT5G56880	hypothetical protein	0.899126	1.21698	2.58108	2.49554	1.06827	1.69733	1.47925	1.74923
										AT5G56960	basic helix-loop-helix (bHLH) family protein	-2.41139	-2.47865	-4.2204	-3.4829	-1.77941	-1.29541	-1.07685	-0.715783
										AT5G56970	CKX3 (CYTOKININ OXIDASE 3); cytokinin dehydrogenase	-0.743068	-1.34717	-1.57212	-1.97179	-0.965696	-0.5696	-1.04291	-1.1214
										AT5G57050	ABI2 (ABA INSENSITIVE 2); protein serine/threonine phosphatase	0.393502	0.626859	0.813041	1.18764	1.18319	1.03819	1.41662	1.218
										AT5G57090	EIR1 (ETHYLENE INSENSITIVE ROOT 1); auxin:hydrogen symporter/ transporter	-0.591456	-0.438623	-1.48721	-1.34627	-0.233362	-0.327792	-0.130679	-0.529444
										AT5G57123	hypothetical protein	1.21854	1.48423	1.55522	1.78092	1.27666	1.27519	1.43892	1.68805
										AT5G57190	PSD2 (PHOSPHATIDYLSERINE DECARBOXYLASE 2); phosphatidylserine decarboxylase	0.285399	0.350756	0.100775	0.114403	1.22618	1.16061	1.13369	1.05814
										AT5G57220	CYP81F2 (cytochrome P450, family 81, subfamily F, polypeptide 2); oxygen binding	-2.02795	-2.60549	-3.1315	-3.0405	-1.28943	-0.771331	-0.472015	-0.496645
										AT5G57240	oxysterol-binding family protein	0.575536	0.812487	0.888228	0.71112	0.539802	1.66989	1.40144	1.39696
										AT5G57320	villin, putative	0.728324	0.672088	1.16132	1.54609	0.666689	0.63385	0.8399	0.776187
										AT5G57420	IAA33 (indoleacetic acid-induced protein 33); transcription factor	-1.17953	-1.01255	-1.71249	-2.70622	-0.965843	-1.43499	-1.00378	-1.8624
										AT5G57590	BIO1 (BIOTIN AUXOTROPH 1)	-0.0805563	-0.0151253	-0.2264	-0.285559	-0.355957	-0.0684551	0.0651395	-0.0642557
										AT5G57625	allergen V5/Tpx-1-related family protein	-0.263866	-0.55666	-1.15727	-1.81199	-0.40776	-0.24755	-0.780685	-0.995631
										AT5G57640	hypothetical protein	-0.900662	-1.3041	-1.45372	-1.5474	-0.37503	-0.754366	-0.834353	-0.674543
										AT5G57770	hypothetical protein	-0.642177	-0.710586	-1.18617	-1.81475	-0.753521	-0.552925	-0.846041	-1.12562
										AT5G57785	hypothetical protein	0.150052	0.309832	0.632536	1.02031	1.14164	1.00375	0.938428	1.1632
										AT5G57790	hypothetical protein	0.496356	0.622269	0.546456	0.592342	0.922522	0.873534	1.11683	1.29533
										AT5G57810	TET15 (TETRASPANIN15)	0.920589	1.28858	2.0293	2.09492	1.38802	1.62054	1.78398	2.21142
										AT5G58360	ATOFP3/OFP3 (Arabidopsis thaliana ovate family protein 3)	-0.114866	-0.464731	-1.14813	-1.89248	-0.391322	-0.139295	-0.550963	-0.442045
										AT5G58390	peroxidase, putative	-0.145283	-0.53817	-0.461539	-1.34111	-0.405527	-0.302586	-0.616868	-0.490125
										AT5G58540	protein kinase family protein	-0.595765	-0.778883	-0.481878	-1.83754	-0.92463	-1.28292	-1.74485	-1.52428
										AT5G58750	wound-responsive protein-related	-0.755752	-0.716186	-1.67904	-1.92121	-1.04917	-0.960731	-1.29248	-1.40291
										AT5G58760	DDB2 (DAMAGED DNA-BINDING 2); nucleotide binding	-0.413436	-0.366454	-0.610748	-1.04381	-0.826839	-0.546244	-0.389163	-0.708742
										AT5G58830	subtilase family protein	1.82141	0.699344	1.13378	5.19323	5.45274	4.20981	3.4585	5.1126
										AT5G58950	protein kinase family protein	-0.124557	-0.226021	-0.321138	-0.342212	-0.25243	-0.270281	-0.206433	-0.253947
										AT5G59090	ATSBT42; subtilase	-0.728408	-0.644031	-1.03685	-1.47522	-0.582665	-0.472507	-0.714794	-0.586334
										AT5G59220	protein phosphatase 2C, putative / PP2C, putative	1.71237	2.10972	2.66976	2.84523	3.6521	4.27431	4.6233	4.80583
										AT5G59260	lectin protein kinase, putative	-0.484309	-0.680208	-1.03016	-2.04279	-1.22481	-1.29007	-1.79682	-1.55817
										AT5G59310	LTP4 (LIPID TRANSFER PROTEIN 4); lipid binding	2.32663	2.40837	3.79644	4.35845	5.30853	3.54903	5.12225	6.04692
										AT5G59320	LTP3 (LIPID TRANSFER PROTEIN 3); lipid binding	1.39142	1.86379	2.73899	4.02769	3.96845	2.94148	3.88127	3.98037
										AT5G59330	pseudo	2.77008	2.30545	2.35487	2.97554	1.4742	2.00023	2.13762	2.38178
										AT5G59480	haloacid dehalogenase-like hydrolase family protein	0.819689	0.819201	0.983596	0.963754	0.579168	0.850209	0.838872	1.01918
										AT5G59490	haloacid dehalogenase-like hydrolase family protein	0.686548	0.625992	1.34574	1.59457	0.92694	1.18523	0.906798	1.55516
										AT5G59660	leucine-rich repeat protein kinase, putative	0.53701	0.435716	0.407197	0.163429	0.522852	0.791166	0.770383	0.996981
										AT5G59680	leucine-rich repeat protein kinase, putative	-0.950252	-1.2161	-1.71483	-2.4126	-0.952183	-1.41983	-1.74778	-1.66036
										AT5G60060	F-box family protein	-0.561018	-0.764847	-1.8067	-3.87056	-0.751413	-1.05486	-1.9107	-2.31002
										AT5G60530	late embryogenesis abundant protein-related / LEA protein-related	-0.42383	-0.351826	-0.952589	-1.04451	-0.812165	-0.56269	-0.457786	-0.721393
										AT5G60600	GcpE (CHLOROPLAST BIOGENESIS 4)	-0.668771	-0.719676	-1.00788	-1.19863	-0.503483	-0.463144	-0.612744	-0.108057
										AT5G60610	F-box family protein	0.569587	0.463561	0.71927	1.1293	0.598533	0.672664	0.94013	1.14941
										AT5G60760	2-phosphoglycerate kinase-related	-1.749	-1.23469	-2.0147	-2.00972	-1.59205	-2.20991	-2.03215	-1.92771
										AT5G60950	COBL5 (COBRA-LIKE PROTEIN 5 PRECURSOR)	-0.592904	-0.739957	-1.1645	-1.71116	-0.929703	-0.500475	-0.635898	-0.890068
										AT5G61010	ATEXO70E2 (EXOCYST SUBUNIT EXO70 FAMILY PROTEIN E2); protein binding	-0.940796	-0.592478	-0.632341	-0.518861	-1.05972	-0.976836	-0.814153	-1.08781
										AT5G61160	AACT1 (ANTHOCYANIN 5-AROMATIC ACYLTRANSFERASE 1); transferase	-0.685934	-1.77537	-6.90908	-7.46508	-2.93013	-4.11627	-3.78392	-3.24289
										AT5G61290	flavin-containing monooxygenase family protein / FMO family protein	0.967228	0.974259	1.52234	1.56376	0.726521	0.865873	0.767169	1.26783
										AT5G61440	thioredoxin family protein	-0.485164	-0.517267	-0.770677	-1.43358	-0.413748	-0.387246	-0.524462	-1.09568
										AT5G61520	hexose transporter, putative	0.656261	0.594099	1.12107	1.42535	0.903263	1.01201	1.19374	1.2577
										AT5G61740	ATATH14 (ABC2 homolog 14); ATPase, coupled to transmembrane movement of substances	-0.182829	-0.1562	-0.179051	-0.96984	-0.708176	-0.918586	-1.44569	-1.67661
										AT5G61850	LFY (LEAFY); transcription factor	-1.24199	-1.16245	-1.15759	-2.19712	-0.747522	-1.24545	-1.46159	-1.83001
										AT5G62040	brother of FT and TFL1 protein (BFT)	0.215744	0.745201	0.586764	0.900121	3.37116	2.81005	2.82267	2.65125
										AT5G62210	embryo-specific protein-related	-1.52372	-0.582407	-0.731751	-0.766567	-0.559205	-1.35101	-0.987253	-1.25698
										AT5G62280	hypothetical protein	-0.69694	-1.00345	-1.68677	-2.23696	-0.577034	-0.438958	-0.684831	-0.756739
										AT5G62360	invertase/pectin methylesterase inhibitor family protein	-0.916242	-1.70237	-2.06603	-2.84581	-0.530855	-1.93287	-2.4003	-2.7776
										AT5G62420	aldo/keto reductase family protein	1.60763	1.227	1.52786	0.836817	1.63299	1.65386	1.16951	1.5
										AT5G62490	ATHVA22B (Arabidopsis thaliana HVA22 homologue B)	0.984175	1.05713	1.5056	3.3797	0.647555	1.24066	2.08645	2.2979
										AT5G62520	SRO5 (SIMILAR TO RCD ONE 5); NAD+ ADP-ribosyltransferase	0.309761	0.28737	0.82647	1.0315	0.231467	0.577453	0.679818	0.739404
										AT5G62530	ALDH12A1 (Aldehyde dehydrogenase 12A1); 1-pyrroline-5-carboxylate dehydrogenase/ 3-chloroallyl aldehyde dehydrogenase	0.522598	0.562268	0.685798	0.659525	0.529924	0.784311	0.910838	1.08198
										AT5G63087	hypothetical protein	1.6838	1.69305	2.23717	2.14777	0.388199	1.27914	1.10083	1.68641
										AT5G63160	BT1 (BTB and TAZ domain protein 1); protein binding / transcription regulator	-0.543982	-0.757732	-0.932832	-1.26021	-0.562916	-0.558794	-1.07975	-1.11868
										AT5G63300	structural constituent of ribosome	0.589495	0.762514	1.01728	0.896096	0.271065	0.582738	0.810161	0.781307
										AT5G63350	hypothetical protein	0.470101	0.489637	0.81885	1.30004	1.18479	1.55356	1.84871	1.78358
										AT5G63650	SNRK2-5/SNRK2/SRK2H (SNF1-RELATED PROTEIN KINASE 2); kinase	-0.173259	-0.141392	-0.67011	-1.45208	-0.346042	-0.313791	-0.245579	-0.990607
										AT5G63750	IBR domain-containing protein	1.74061	1.86885	2.27137	3.03394	1.76287	1.69276	1.68406	1.81963
										AT5G64080	protease inhibitor/seed storage/lipid transfer protein (LTP) family protein	0.951483	1.01441	1.13741	0.967264	0.378937	0.569116	1.19202	1.11956
										AT5G64100	peroxidase, putative	-0.559119	-0.504177	-0.307135	-0.306753	-0.640638	-1.17905	-1.37959	-1.21364
										AT5G64570	XYL4 (beta-xylosidase 4); hydrolase, hydrolyzing O-glycosyl compounds	-0.685801	-0.66626	-1.20242	-1.1518	-0.420126	-0.490412	-0.559319	-0.700902
										AT5G64870	hypothetical protein	0.674836	1.29358	1.75359	1.73091	0.708104	0.972479	0.699291	0.395321
										AT5G65070	MAF4 (MADS AFFECTING FLOWERING 4)	-0.0460772	-0.348953	-0.8684	-1.1866	-0.480359	-0.125978	-0.281484	-0.359543
										AT5G65080	AGL68/MAF5 (MADS AFFECTING FLOWERING 5); transcription factor	-0.187583	-0.943661	-1.25897	-1.52069	-0.321088	-0.314878	-0.722249	-0.7915
										AT5G65160	tetratricopeptide repeat (TPR)-containing protein	-0.425274	-0.572977	-0.976296	-1.34884	-0.622724	-0.317559	-0.677573	-0.777836
										AT5G65280	GCL1 (GCR2-LIKE 1); catalytic	0.260807	0.310473	0.567348	0.928238	0.337732	1.07962	0.835417	1.1329
										AT5G65320	basic helix-loop-helix (bHLH) family protein	0.738702	0.871663	1.10178	1.24201	0.144329	0.355065	0.528279	0.855549
										AT5G65600	legume lectin family protein / protein kinase family protein	-1.07513	-0.911361	-1.09458	-1.00177	-0.94236	-0.980325	-0.621922	-0.389003
										AT5G65690	PCK2/PEPCK (PHOSPHOENOLPYRUVATE CARBOXYKINASE 2); ATP binding / phosphoenolpyruvate carboxykinase (ATP)	-0.251825	-0.776662	-1.64307	-2.89697	-0.216107	-0.40767	-0.612116	-0.671938
										AT5G65870	ATPSK5 (PHYTOSULFOKINE 5 PRECURSOR); growth factor	0.786667	1.158	2.16655	2.72281	1.3127	1.35997	1.38563	1.64007
										AT5G65970	MLO10 (MILDEW RESISTANCE LOCUS O 10); calmodulin binding	-0.223267	-0.230064	-0.729642	-0.951599	-0.155105	-0.434458	-0.352587	-0.459081
										AT5G66150	glycosyl hydrolase family 38 protein	2.56742	3.21352	3.81849	3.80412	2.38249	2.09229	2.15105	3.02478
										AT5G66400	RAB18 (RESPONSIVE TO ABA 18)	0.374896	0.455327	0.554248	0.622594	2.85298	2.61053	2.75985	2.32714
										AT5G66460	(1-4)-beta-mannan endohydrolase, putative	0.651619	0.820644	0.685468	0.705642	0.548183	0.46657	0.9426	1.20728
										AT5G66480	hypothetical protein	0.275953	0.240225	0.569248	1.0133	0.257214	0.362066	0.327044	0.764824
										AT5G66580	hypothetical protein	-0.370091	-0.351445	-0.622907	-0.778915	-0.553814	-0.700334	-0.648004	-1.24304
										AT5G66700	HB53 (homeobox-8); DNA binding / transcription factor	-0.779312	-1.42623	-2.02698	-2.7065	-1.23028	-1.25794	-1.44456	-1.98052
										AT5G66740	hypothetical protein	0.743734	0.859985	1.22416	1.20015	0.166221	0.975345	0.881948	0.901717
										AT5G66810	hypothetical protein	-0.151289	-0.346389	-0.524505	-1.03686	-0.863286	-0.336995	-0.560321	-0.537086
										AT5G67030	ABA1 (ABA DEFICIENT 1); zeaxanthin epoxidase	-0.232599	-0.617066	-0.785415	-1.1475	-0.315512	-0.253121	-0.743193	-0.456228
										AT5G67160	transferase family protein	-0.602331	-0.894041	-0.992409	-1.29443	-0.327486	-0.605147	-0.813123	-0.709245
										AT5G67200	leucine-rich repeat transmembrane protein kinase, putative	0.556489	0.551062	0.464123	0.797128	0.412497	0.600985	0.809041	1.12674
										AT5G67245	hypothetical protein	0.20282	0.497197	0.768437	1.1224	0.303546	0.190613	0.304061	0.154284
