# Supplementary material for: Salt-Specific Gene Expression Reveals Elevated Auxin Levels in Arabidopsis thaliana Plants Grown Under Saline Conditions
Source: Front Plant Sci. 2022 Feb 10;13:804716. doi: 10.3389/fpls.2022.804716 (PMC8866861; doi:10.3389/fpls.2022.804716)
Supplement: Supplementary file 4 [file Table_3.XLSX]

## Sheet: Sheet1
Supp Table 3: The genes from the salt-specific and osmotic gene lists present in each GO annotation
Salt-specific genes		Osmotic genes
Gene_ID	Gene name/description	Gene_ID	Gene name/description
GO term: cellular response to hypoxia		GO term: response to water deprivation		*lists presented as Arabidopsis gene accession numbers accoring to TAIR (https://www.arabidopsis.org/)
AT1G09070	(AT)SRC2/SRC2 (SOYBEAN GENE REGULATED BY COLD-2); protein binding	AT1G01470	LEA14 (LATE EMBRYOGENESIS ABUNDANT 14)
AT1G10140	hypothetical protein	AT1G01620	PIP1C (PLASMA MEMBRANE INTRINSIC PROTEIN 1;3); water channel
AT1G19530	hypothetical protein	AT1G02205	CER1 (ECERIFERUM 1)
AT1G26410	FAD-binding domain-containing protein	AT1G05680	UDP-glucoronosyl/UDP-glucosyl transferase family protein
AT1G43800	acyl-(acyl-carrier-protein) desaturase, putative / stearoyl-ACP desaturase, putative	AT1G32560	late embryogenesis abundant group 1 domain-containing protein / LEA group 1 domain-containing protein
AT1G59660	nucleoporin family protein	AT1G43160	RAP2 (related to AP2 6); DNA binding / transcription factor
AT1G66090	disease resistance protein (TIR-NBS class), putative	AT1G48130	ATPER1 (Arabidopsis thaliana 1-cysteine peroxiredoxin 1); antioxidant
AT1G68620	hydrolase	AT1G52400	BGL1 (BETA-GLUCOSIDASE HOMOLOG 1); hydrolase, hydrolyzing O-glycosyl compounds
AT2G14247	Expressed protein	AT1G52690	late embryogenesis abundant protein, putative / LEA protein, putative
AT2G16060	AHB1 (ARABIDOPSIS HEMOGLOBIN 1)	AT1G52890	ANAC019 (Arabidopsis NAC domain containing protein 19); transcription factor
AT2G23270	hypothetical protein	AT1G56600	ATGOLS2 (ARABIDOPSIS THALIANA GALACTINOL SYNTHASE 2); transferase, transferring glycosyl groups / transferase, transferring hexosyl groups
AT2G46400	WRKY46 (WRKY DNA-binding protein 46); transcription factor	AT1G64660	ATMGL; catalytic/ methionine gamma-lyase
AT3G03280	hypothetical protein	AT1G65486	hypothetical protein
AT3G07350	hypothetical protein	AT1G65500	hypothetical protein
AT3G24715	ATP binding / protein kinase/ protein-tyrosine kinase	AT1G79600	ABC1 family protein
AT3G55790	hypothetical protein	AT2G02820	MYB88 (myb domain protein 88); DNA binding / transcription factor
AT4G27450	hypothetical protein	AT2G18050	HIS1-3 (HISTONE H1-3); DNA binding
AT4G33560	hypothetical protein	AT2G21490	LEA (DEHYDRIN LEA)
AT4G38470	protein kinase family protein	AT2G22125	binding
AT5G06320	NHL3 (NDR1/HIN1-like 3)	AT2G31470	F-box family protein
AT5G19240	hypothetical protein	AT2G33380	RD20 (RESPONSIVE TO DESSICATION 20); calcium ion binding
AT5G20250	DIN10 (DARK INDUCIBLE 10); hydrolase, hydrolyzing O-glycosyl compounds	AT2G35300	late embryogenesis abundant group 1 domain-containing protein / LEA group 1 domain-containing protein
AT5G20790	hypothetical protein	AT2G36270	ABI5 (ABA INSENSITIVE 5); DNA binding / transcription activator/ transcription factor
AT5G54490	PBP1 (PINOID-BINDING PROTEIN 1); calcium ion binding	AT2G37040	PAL1 (PHE AMMONIA LYASE 1); phenylalanine ammonia-lyase
AT5G58120	disease resistance protein (TIR-NBS-LRR class), putative	AT2G37760	aldo/keto reductase family protein
AT5G63130	octicosapeptide/Phox/Bem1p (PB1) domain-containing protein	AT2G38530	LTP2 (LIPID TRANSFER PROTEIN 2); lipid binding
AT5G64260	phosphate-responsive protein, putative	AT2G39800	P5CS1 (DELTA1-PYRROLINE-5-CARBOXYLATE SYNTHASE 1)
GO term: response to auxin		AT2G41010	ATCAMBP25 (ARABIDOPSIS THALIANA CALMODULIN (CAM)-BINDING PROTEIN OF 25 KDA); calmodulin binding
AT1G05180	AXR1 (AUXIN RESISTANT 1); small protein activating enzyme	AT2G41230	hypothetical protein
AT1G13670	hypothetical protein	AT2G41870	remorin family protein
AT1G27740	basic helix-loop-helix (bHLH) family protein	AT2G42540	COR15A (COLD-REGULATED 15A)
AT1G29460	auxin-responsive protein, putative	AT2G46680	ATHB-7 (ARABIDOPSIS THALIANA HOMEOBOX 7); transcription factor
AT1G43040	auxin-responsive protein, putative	AT2G47780	rubber elongation factor (REF) protein-related
AT2G21210	auxin-responsive protein, putative	AT3G02480	ABA-responsive protein-related
AT3G01220	ATHB20 (ARABIDOPSIS THALIANA HOMEOBOX PROTEIN 20); DNA binding / transcription factor	AT3G05640	protein phosphatase 2C, putative / PP2C, putative
AT3G03830	auxin-responsive protein, putative	AT3G08770	LTP6 (Lipid transfer protein 6); lipid binding
AT3G03840	auxin-responsive protein, putative	AT3G27690	LHCB2:4 (Photosystem II light harvesting complex gene 2); chlorophyll binding
AT3G12955	auxin-responsive protein-related	AT3G28270	hypothetical protein
AT3G28910	MYB30 (myb domain protein 30); DNA binding / transcription factor	AT3G30775	ERD5 (EARLY RESPONSIVE TO DEHYDRATION 5); proline dehydrogenase
AT3G55120	A11/CFI/TT5 (TRANSPARENT TESTA 5); chalcone isomerase	AT3G45140	LOX2 (LIPOXYGENASE 2)
AT4G19690	IRT1 (IRON-REGULATED TRANSPORTER 1); cadmium ion transmembrane transporter/ iron ion transmembrane transporter/ manganese ion transmembrane transporter/ zinc ion transmembrane transporter	AT3G50310	MAPKKK20 (Mitogen-activated protein kinase kinase kinase 20); kinase
AT4G27260	GH3/WES1; indole-3-acetic acid amido synthetase	AT3G50970	LTI30 (LOW TEMPERATURE-INDUCED 30)
AT4G32810	CCD8 (CAROTENOID CLEAVAGE DIOXYGENASE 8)	AT3G54770	RNA recognition motif (RRM)-containing protein
AT4G36110	auxin-responsive protein, putative	AT3G63060	EDL3 (EID1-LIKE 3)
AT4G38840	auxin-responsive protein, putative	AT4G00430	TMP-C (PLASMA MEMBRANE INTRINSIC PROTEIN 1;4); water channel
AT4G38850	SAUR_AC1 (SMALL AUXIN UP RNA 1 FROM ARABIDOPSIS THALIANA ECOTYPE COLUMBIA)	AT4G02280	SUS3; UDP-glycosyltransferase/ sucrose synthase/ transferase, transferring glycosyl groups
AT4G38860	auxin-responsive protein, putative	AT4G11890	protein kinase family protein
AT5G03310	auxin-responsive family protein	AT4G20260	DREPP plasma membrane polypeptide family protein
AT5G27780	auxin-responsive family protein	AT4G24275	hypothetical protein
AT5G37770	TCH2 (TOUCH 2); calcium ion binding	AT4G34100	protein binding / zinc ion binding
AT5G47370	HAT2; transcription factor	AT5G06530	ABC transporter family protein
AT5G53590	auxin-responsive family protein	AT5G07690	MYB29 (myb domain protein 29); DNA binding / transcription factor
AT5G54490	PBP1 (PINOID-BINDING PROTEIN 1); calcium ion binding	AT5G07700	MYB76 (myb domain protein 76); DNA binding / transcription factor
		AT5G15960	KIN1
		AT5G15970	KIN2 (COLD-RESPONSIVE 6)
		AT5G17960	DC1 domain-containing protein
		AT5G23010	MAM1 (2-isopropylmalate synthase 3); 2-isopropylmalate synthase
		AT5G24090	acidic endochitinase (CHIB1)
		AT5G25610	RD22 (RESPONSIVE TO DESSICATION 22)
		AT5G49630	AAP6 (AMINO ACID PERMEASE 6); amino acid transmembrane transporter
		AT5G50720	ATHVA22E (Arabidopsis thaliana HVA22 homologue E)
		AT5G52300	LTI65/RD29B (RESPONSIVE TO DESSICATION 29B)
		AT5G52310	COR78 (COLD REGULATED 78)
		AT5G57050	ABI2 (ABA INSENSITIVE 2); protein serine/threonine phosphatase
		AT5G59220	protein phosphatase 2C, putative / PP2C, putative
		AT5G59310	LTP4 (LIPID TRANSFER PROTEIN 4); lipid binding
		AT5G59320	LTP3 (LIPID TRANSFER PROTEIN 3); lipid binding
		AT5G66400	RAB18 (RESPONSIVE TO ABA 18)
		AT5G67030	ABA1 (ABA DEFICIENT 1); zeaxanthin epoxidase
		GO term: response to wounding
		AT1G01470	LEA14 (LATE EMBRYOGENESIS ABUNDANT 14)
		AT1G01720	ATAF1 (Arabidopsis NAC domain containing protein 2); transcription factor
		AT1G07640	OBP2 (OBF BINDING PROTEIN 2); DNA binding
		AT1G16160	WAKL5 (WALL ASSOCIATED KINASE-LIKE 5); kinase
		AT1G17380	JAZ5/TIFY11A (JASMONATE-ZIM-DOMAIN PROTEIN 5)
		AT1G17420	LOX3 (Lipoxygenase 3); iron ion binding / lipoxygenase/ metal ion binding / oxidoreductase, acting on single donors with incorporation of molecular oxygen, incorporation of two atoms of oxygen
		AT1G19640	JMT (JASMONIC ACID CARBOXYL METHYLTRANSFERASE); jasmonate O-methyltransferase
		AT1G32920	hypothetical protein
		AT1G43160	RAP2 (related to AP2 6); DNA binding / transcription factor
		AT1G48500	JAZ4/TIFY6A (JASMONATE-ZIM-DOMAIN PROTEIN 4)
		AT1G52030	MBP2 (MYROSINASE-BINDING PROTEIN 2)
		AT1G55020	LOX1 (Lipoxygenase 1); lipoxygenase
		AT1G61340	F-box family protein
		AT1G72520	lipoxygenase, putative
		AT1G73260	trypsin and protease inhibitor family protein / Kunitz family protein
		AT1G76680	OPR1 (12-oxophytodienoate reductase 1); 12-oxophytodienoate reductase
		AT2G06050	OPR3 (OPDA-REDUCTASE 3); 12-oxophytodienoate reductase
		AT2G24850	TAT3 (TYROSINE AMINOTRANSFERASE 3); transaminase
		AT2G34600	JAZ7/TIFY5B (JASMONATE-ZIM-DOMAIN PROTEIN 7)
		AT2G37040	PAL1 (PHE AMMONIA LYASE 1); phenylalanine ammonia-lyase
		AT2G46510	basic helix-loop-helix (bHLH) family protein
		AT3G15356	legume lectin family protein
		AT3G44860	FAMT (FARNESOIC ACID CARBOXYL-O-METHYLTRANSFERASE); S-adenosylmethionine-dependent methyltransferase/ farnesoic acid O-methyltransferase
		AT3G45140	LOX2 (LIPOXYGENASE 2)
		AT3G48520	CYP94B3 (cytochrome P450, family 94, subfamily B, polypeptide 3); oxygen binding
		AT4G15440	HPL1 (HYDROPEROXIDE LYASE 1); heme binding / iron ion binding / monooxygenase
		AT4G16740	ATTPS03 (Arabidopsis thaliana terpene synthase 03)
		AT4G21440	ATM4/ATMYB102 (ARABIDOPSIS MYB-LIKE 102); DNA binding / transcription factor
		AT4G22880	LDOX (TANNIN DEFICIENT SEED 4)
		AT4G23600	CORI3 (CORONATINE INDUCED 1, JASMONIC ACID RESPONSIVE 2); transaminase
		AT4G24350	phosphorylase family protein
		AT4G34710	ADC2 (ARGININE DECARBOXYLASE 2)
		AT5G07690	MYB29 (myb domain protein 29); DNA binding / transcription factor
		AT5G07700	MYB76 (myb domain protein 76); DNA binding / transcription factor
		AT5G13220	JAS1/JAZ10/TIFY9 (JASMONATE-ZIM-DOMAIN PROTEIN 10)
		AT5G13930	ATCHS/CHS/TT4 (CHALCONE SYNTHASE); naringenin-chalcone synthase
		AT5G24090	acidic endochitinase (CHIB1)
		AT5G24770	VSP2 (VEGETATIVE STORAGE PROTEIN 2); acid phosphatase
		AT5G40990	GLIP1 (GDSL LIPASE1); carboxylesterase
		AT5G43570	serine-type endopeptidase inhibitor
		AT5G44420	PDF1 (Low-molecular-weight cysteine-rich 77)
		AT5G47240	ATNUDT8 (Arabidopsis thaliana Nudix hydrolase homolog 8); hydrolase
		AT5G52310	COR78 (COLD REGULATED 78)
		AT5G54170	hypothetical protein
		GO term: response to jasmonic acid
		AT1G07640	OBP2 (OBF BINDING PROTEIN 2); DNA binding
		AT1G15380	lactoylglutathione lyase family protein / glyoxalase I family protein
		AT1G17380	JAZ5/TIFY11A (JASMONATE-ZIM-DOMAIN PROTEIN 5)
		AT1G17420	LOX3 (Lipoxygenase 3); iron ion binding / lipoxygenase/ metal ion binding / oxidoreductase, acting on single donors with incorporation of molecular oxygen, incorporation of two atoms of oxygen
		AT1G19640	JMT (JASMONIC ACID CARBOXYL METHYLTRANSFERASE); jasmonate O-methyltransferase
		AT1G31670	copper amine oxidase, putative
		AT1G43160	RAP2 (related to AP2 6); DNA binding / transcription factor
		AT1G48500	JAZ4/TIFY6A (JASMONATE-ZIM-DOMAIN PROTEIN 4)
		AT1G53130	stigma-specific Stig1 family protein
		AT1G54040	ESP (EPITHIOSPECIFIER PROTEIN)
		AT1G55020	LOX1 (Lipoxygenase 1); lipoxygenase
		AT1G56650	PAP1 (PRODUCTION OF ANTHOCYANIN PIGMENT 1); DNA binding / transcription factor
		AT1G61340	F-box family protein
		AT1G67710	ARR11 (RESPONSE REGULATOR 11); transcription factor/ two-component response regulator
		AT1G70170	MMP (MATRIX METALLOPROTEINASE); metalloendopeptidase
		AT2G24850	TAT3 (TYROSINE AMINOTRANSFERASE 3); transaminase
		AT2G34600	JAZ7/TIFY5B (JASMONATE-ZIM-DOMAIN PROTEIN 7)
		AT2G38240	oxidoreductase, 2OG-Fe(II) oxygenase family protein
		AT2G39030	GCN5-related N-acetyltransferase (GNAT) family protein
		AT2G39730	RCA (RUBISCO ACTIVASE)
		AT2G40330	Bet v I allergen family protein
		AT3G11180	oxidoreductase, 2OG-Fe(II) oxygenase family protein
		AT3G15356	legume lectin family protein
		AT3G27920	GL1 (GLABRA 1); transcription factor
		AT3G44860	FAMT (FARNESOIC ACID CARBOXYL-O-METHYLTRANSFERASE); S-adenosylmethionine-dependent methyltransferase/ farnesoic acid O-methyltransferase
		AT3G45140	LOX2 (LIPOXYGENASE 2)
		AT3G55970	oxidoreductase, 2OG-Fe(II) oxygenase family protein
		AT4G09820	TT8 (TRANSPARENT TESTA 8); DNA binding / transcription factor
		AT4G16740	ATTPS03 (Arabidopsis thaliana terpene synthase 03)
		AT4G19810	glycosyl hydrolase family 18 protein
		AT4G22880	LDOX (TANNIN DEFICIENT SEED 4)
		AT4G23600	CORI3 (CORONATINE INDUCED 1, JASMONIC ACID RESPONSIVE 2); transaminase
		AT4G34710	ADC2 (ARGININE DECARBOXYLASE 2)
		AT5G07010	sulfotransferase family protein
		AT5G07690	MYB29 (myb domain protein 29); DNA binding / transcription factor
		AT5G13220	JAS1/JAZ10/TIFY9 (JASMONATE-ZIM-DOMAIN PROTEIN 10)
		AT5G13930	ATCHS/CHS/TT4 (CHALCONE SYNTHASE); naringenin-chalcone synthase
		AT5G24770	VSP2 (VEGETATIVE STORAGE PROTEIN 2); acid phosphatase
		AT5G24780	VSP1 (VEGETATIVE STORAGE PROTEIN 1)
		AT5G44420	PDF1 (Low-molecular-weight cysteine-rich 77)
		AT5G54060	UF3GT (UDP-GLUCOSE:FLAVONOID 3-O-GLUCOSYLTRANSFERASE); transferase, transferring glycosyl groups
		AT5G59090	ATSBT42; subtilase
		AT5G67160	transferase family protein
		GO term: response to oxidative stress
		AT1G03850	glutaredoxin family protein
		AT1G05680	UDP-glucoronosyl/UDP-glucosyl transferase family protein
		AT1G07400	17 kDa class I heat shock protein (HSP17-CI)
		AT1G14540	anionic peroxidase, putative
		AT1G14870	hypothetical protein
		AT1G21520	hypothetical protein
		AT1G22770	GI (GIGANTEA); binding
		AT1G35910	trehalose-6-phosphate phosphatase, putative
		AT1G53130	stigma-specific Stig1 family protein
		AT1G56600	ATGOLS2 (ARABIDOPSIS THALIANA GALACTINOL SYNTHASE 2); transferase, transferring glycosyl groups / transferase, transferring hexosyl groups
		AT1G56650	PAP1 (PRODUCTION OF ANTHOCYANIN PIGMENT 1); DNA binding / transcription factor
		AT1G60470	ATGOLS4 (ARABIDOPSIS THALIANA GALACTINOL SYNTHASE 4); transferase, transferring glycosyl groups / transferase, transferring hexosyl groups
		AT1G60740	peroxiredoxin type 2, putative
		AT1G62380	ACO2 (ACC OXIDASE 2)
		AT1G65970	TPX2 (THIOREDOXIN-DEPENDENT PEROXIDASE 2); antioxidant
		AT1G72060	serine-type endopeptidase inhibitor
		AT1G72520	lipoxygenase, putative
		AT1G73260	trypsin and protease inhibitor family protein / Kunitz family protein
		AT1G73680	pathogen-responsive alpha-dioxygenase, putative
		AT1G79600	ABC1 family protein
		AT1G80130	binding
		AT2G06050	OPR3 (OPDA-REDUCTASE 3); 12-oxophytodienoate reductase
		AT2G19590	ACO1 (ACC OXIDASE 1); 1-aminocyclopropane-1-carboxylate oxidase
		AT2G22420	peroxidase 17 (PER17) (P17)
		AT2G25080	ATGPX1 (GLUTATHIONE PEROXIDASE 1); glutathione peroxidase
		AT2G29450	ATGSTU5 (Arabidopsis thaliana Glutathione S-transferase (class tau) 5); glutathione transferase
		AT2G29500	17 kDa class I small heat shock protein (HSP17B-CI)
		AT2G34060	peroxidase, putative
		AT2G37040	PAL1 (PHE AMMONIA LYASE 1); phenylalanine ammonia-lyase
		AT2G39800	P5CS1 (DELTA1-PYRROLINE-5-CARBOXYLATE SYNTHASE 1)
		AT2G40000	hypothetical protein
		AT2G41480	peroxidase
		AT3G01190	peroxidase 27 (PER27) (P27) (PRXR7)
		AT3G03670	peroxidase, putative
		AT3G16670	hypothetical protein
		AT3G17070	peroxidase, putative
		AT3G30775	ERD5 (EARLY RESPONSIVE TO DEHYDRATION 5); proline dehydrogenase
		AT3G49110	ATPCA/ATPRX33/PRX33/PRXCA (PEROXIDASE 33); peroxidase
		AT3G50310	MAPKKK20 (Mitogen-activated protein kinase kinase kinase 20); kinase
		AT4G01970	ATSTS (ARABIDOPSIS THALIANA STACHYOSE SYNTHASE); galactinol-raffinose galactosyltransferase/ hydrolase, hydrolyzing O-glycosyl compounds
		AT4G04810	methionine sulfoxide reductase domain-containing protein / SeIR domain-containing protein
		AT4G04840	methionine sulfoxide reductase domain-containing protein / SeIR domain-containing protein
		AT4G08770	peroxidase, putative
		AT4G08780	peroxidase, putative
		AT4G11290	peroxidase, putative
		AT4G12000	hypothetical protein
		AT4G16270	peroxidase 40 (PER40) (P40)
		AT4G20190	hypothetical protein
		AT4G21840	methionine sulfoxide reductase domain-containing protein / SelR domain-containing protein
		AT4G25980	cationic peroxidase, putative
		AT4G26010	peroxidase, putative
		AT4G31760	peroxidase, putative
		AT4G33420	peroxidase, putative
		AT4G34710	ADC2 (ARGININE DECARBOXYLASE 2)
		AT4G37610	BT5 (BTB and TAZ domain protein 5); protein binding / transcription regulator
		AT5G05340	peroxidase, putative
		AT5G10720	AHK5 (CYTOKININ INDEPENDENT 2)
		AT5G13930	ATCHS/CHS/TT4 (CHALCONE SYNTHASE); naringenin-chalcone synthase
		AT5G19890	peroxidase, putative
		AT5G20250	DIN10 (DARK INDUCIBLE 10); hydrolase, hydrolyzing O-glycosyl compounds
		AT5G22410	peroxidase, putative
		AT5G24770	VSP2 (VEGETATIVE STORAGE PROTEIN 2); acid phosphatase
		AT5G42380	CML37/CML39; calcium ion binding
		AT5G52310	COR78 (COLD REGULATED 78)
		AT5G56550	hypothetical protein
		AT5G58390	peroxidase, putative
		AT5G63160	BT1 (BTB and TAZ domain protein 1); protein binding / transcription regulator
		AT5G64100	peroxidase, putative
		GO term: cellular response to hypoxia
		AT1G01720	ATAF1 (Arabidopsis NAC domain containing protein 2); transcription factor
		AT1G07400	17 kDa class I heat shock protein (HSP17-CI)
		AT1G13260	RAV1 (Related to ABI3/VP1 1); DNA binding / transcription factor
		AT1G13300	myb family transcription factor
		AT1G14540	anionic peroxidase, putative
		AT1G15010	hypothetical protein
		AT1G26380	FAD-binding domain-containing protein
		AT1G43800	acyl-(acyl-carrier-protein) desaturase, putative / stearoyl-ACP desaturase, putative
		AT1G61340	F-box family protein
		AT1G65490	hypothetical protein
		AT1G72360	ethylene-responsive element-binding protein, putative
		AT1G76680	OPR1 (12-oxophytodienoate reductase 1); 12-oxophytodienoate reductase
		AT1G78070	WD-40 repeat family protein
		AT2G18670	zinc finger (C3HC4-type RING finger) family protein
		AT2G25735	hypothetical protein
		AT2G26560	PLP2 (PHOSPHOLIPASE A 2A); nutrient reservoir
		AT2G32200	hypothetical protein
		AT2G32210	hypothetical protein
		AT2G40000	hypothetical protein
		AT2G41010	ATCAMBP25 (ARABIDOPSIS THALIANA CALMODULIN (CAM)-BINDING PROTEIN OF 25 KDA); calmodulin binding
		AT3G02040	SRG3 (SENESCENCE-RELATED GENE 3); glycerophosphodiester phosphodiesterase
		AT3G03670	peroxidase, putative
		AT3G22550	senescence-associated protein-related
		AT3G23150	ETR2 (ETHYLENE RESPONSE 2); receptor
		AT3G30775	ERD5 (EARLY RESPONSIVE TO DEHYDRATION 5); proline dehydrogenase
		AT3G43190	SUS4; UDP-glycosyltransferase/ sucrose synthase/ transferase, transferring glycosyl groups
		AT3G46080	zinc finger (C2H2 type) family protein
		AT3G47720	SRO4 (SIMILAR TO RCD ONE 4); NAD+ ADP-ribosyltransferase
		AT3G50440	hydrolase
		AT4G01360	hypothetical protein
		AT4G19520	disease resistance protein (TIR-NBS-LRR class), putative
		AT4G29780	hypothetical protein
		AT4G31970	CYP82C2 (cytochrome P450, family 82, subfamily C, polypeptide 2); oxygen binding
		AT4G38470	protein kinase family protein
		AT5G19120	aspartic-type endopeptidase/ pepsin A
		AT5G20250	DIN10 (DARK INDUCIBLE 10); hydrolase, hydrolyzing O-glycosyl compounds
		AT5G41080	glycerophosphoryl diester phosphodiesterase family protein
		AT5G42380	CML37/CML39; calcium ion binding
		AT5G45630	hypothetical protein
		AT5G54960	PDC2 (PYRUVATE DECARBOXYLASE-2); pyruvate decarboxylase
		AT5G57220	CYP81F2 (cytochrome P450, family 81, subfamily F, polypeptide 2); oxygen binding
		AT5G62520	SRO5 (SIMILAR TO RCD ONE 5); NAD+ ADP-ribosyltransferase
		GO term: response to abscisic acid
		AT1G01720	ATAF1 (Arabidopsis NAC domain containing protein 2); transcription factor
		AT1G05680	UDP-glucoronosyl/UDP-glucosyl transferase family protein
		AT1G07430	protein phosphatase 2C, putative / PP2C, putative
		AT1G13300	myb family transcription factor
		AT1G15380	lactoylglutathione lyase family protein / glyoxalase I family protein
		AT1G18100	E12A11; phosphatidylethanolamine binding
		AT1G43160	RAP2 (related to AP2 6); DNA binding / transcription factor
		AT1G52400	BGL1 (BETA-GLUCOSIDASE HOMOLOG 1); hydrolase, hydrolyzing O-glycosyl compounds
		AT1G55020	LOX1 (Lipoxygenase 1); lipoxygenase
		AT1G56600	ATGOLS2 (ARABIDOPSIS THALIANA GALACTINOL SYNTHASE 2); transferase, transferring glycosyl groups / transferase, transferring hexosyl groups
		AT1G61340	F-box family protein
		AT1G63840	zinc finger (C3HC4-type RING finger) family protein
		AT1G67710	ARR11 (RESPONSE REGULATOR 11); transcription factor/ two-component response regulator
		AT1G69260	hypothetical protein
		AT1G70800	C2 domain-containing protein
		AT1G75750	GASA1 (GAST1 PROTEIN HOMOLOG 1)
		AT2G02820	MYB88 (myb domain protein 88); DNA binding / transcription factor
		AT2G18470	protein kinase family protein
		AT2G21490	LEA (DEHYDRIN LEA)
		AT2G26040	Bet v I allergen family protein
		AT2G31470	F-box family protein
		AT2G33380	RD20 (RESPONSIVE TO DESSICATION 20); calcium ion binding
		AT2G36270	ABI5 (ABA INSENSITIVE 5); DNA binding / transcription activator/ transcription factor
		AT2G36690	oxidoreductase, 2OG-Fe(II) oxygenase family protein
		AT2G38310	hypothetical protein
		AT2G38940	ATPT2 (PHOSPHATE TRANSPORTER 2); carbohydrate transmembrane transporter/ phosphate transmembrane transporter/ sugar:hydrogen ion symporter
		AT2G39800	P5CS1 (DELTA1-PYRROLINE-5-CARBOXYLATE SYNTHASE 1)
		AT2G40170	ATEM6/GEA6 (ARABIDOPSIS EARLY METHIONINE-LABELLED 6)
		AT2G40330	Bet v I allergen family protein
		AT2G40340	AP2 domain-containing transcription factor, putative (DRE2B)
		AT2G41230	hypothetical protein
		AT2G41870	remorin family protein
		AT2G41940	ZFP8 (ZINC FINGER PROTEIN 8); nucleic acid binding / transcription factor/ zinc ion binding
		AT2G42530	COR15B
		AT2G42540	COR15A (COLD-REGULATED 15A)
		AT2G43140	DNA binding / transcription factor
		AT2G46270	GBF3 (G-BOX BINDING FACTOR 3); transcription factor
		AT2G46510	basic helix-loop-helix (bHLH) family protein
		AT2G46680	ATHB-7 (ARABIDOPSIS THALIANA HOMEOBOX 7); transcription factor
		AT2G47050	invertase/pectin methylesterase inhibitor family protein
		AT2G47770	benzodiazepine receptor-related
		AT3G02140	TMAC2 (TWO OR MORE ABRES-CONTAINING GENE 2)
		AT3G20470	pseudo
		AT3G27690	LHCB2:4 (Photosystem II light harvesting complex gene 2); chlorophyll binding
		AT3G29575	hypothetical protein
		AT3G50310	MAPKKK20 (Mitogen-activated protein kinase kinase kinase 20); kinase
		AT3G50970	LTI30 (LOW TEMPERATURE-INDUCED 30)
		AT3G51810	ATEM1 (Early methionine labelled)
		AT3G54770	RNA recognition motif (RRM)-containing protein
		AT3G59220	PRN (PIRIN); calmodulin binding
		AT3G60090	VQ motif-containing protein
		AT3G63060	EDL3 (EID1-LIKE 3)
		AT4G11890	protein kinase family protein
		AT4G12480	pEARLI 1; lipid binding
		AT4G18010	IP5PII (INOSITOL POLYPHOSPHATE 5-PHOSPHATASE II); inositol-polyphosphate 5-phosphatase
		AT4G19810	glycosyl hydrolase family 18 protein
		AT4G23260	protein kinase
		AT4G23600	CORI3 (CORONATINE INDUCED 1, JASMONIC ACID RESPONSIVE 2); transaminase
		AT4G28080	binding
		AT4G30160	VLN4 (ARABIDOPSIS THALIANA VILLIN 4); actin binding
		AT4G33980	hypothetical protein
		AT4G34710	ADC2 (ARGININE DECARBOXYLASE 2)
		AT4G36830	GNS1/SUR4 membrane family protein
		AT4G38470	protein kinase family protein
		AT5G01540	lectin protein kinase, putative
		AT5G05440	hypothetical protein
		AT5G10720	AHK5 (CYTOKININ INDEPENDENT 2)
		AT5G13170	nodulin MtN3 family protein
		AT5G13200	GRAM domain-containing protein / ABA-responsive protein-related
		AT5G15960	KIN1
		AT5G15970	KIN2 (COLD-RESPONSIVE 6)
		AT5G20635	hypothetical protein
		AT5G25610	RD22 (RESPONSIVE TO DESSICATION 22)
		AT5G28770	BZO2H3 (ARABIDOPSIS THALIANA BASIC LEUCINE ZIPPER 63); DNA binding / transcription factor
		AT5G44120	CRA1 (CRUCIFERINA); nutrient reservoir
		AT5G44610	MAP18 (MICROTUBULE-ASSOCIATED PROTEIN 18); microtubule binding
		AT5G45820	CIPK20 (CBL-INTERACTING PROTEIN KINASE 20); kinase
		AT5G45830	DOG1 (DELAY OF GERMINATION 1)
		AT5G49620	AtMYB78 (myb domain protein 78); DNA binding / transcription factor
		AT5G50720	ATHVA22E (Arabidopsis thaliana HVA22 homologue E)
		AT5G52300	LTI65/RD29B (RESPONSIVE TO DESSICATION 29B)
		AT5G52310	COR78 (COLD REGULATED 78)
		AT5G57050	ABI2 (ABA INSENSITIVE 2); protein serine/threonine phosphatase
		AT5G59220	protein phosphatase 2C, putative / PP2C, putative
		AT5G59310	LTP4 (LIPID TRANSFER PROTEIN 4); lipid binding
		AT5G59320	LTP3 (LIPID TRANSFER PROTEIN 3); lipid binding
		AT5G62490	ATHVA22B (Arabidopsis thaliana HVA22 homologue B)
		AT5G66400	RAB18 (RESPONSIVE TO ABA 18)
		GO term: response to karrikin
		AT1G05680	UDP-glucoronosyl/UDP-glucosyl transferase family protein
		AT1G22770	GI (GIGANTEA); binding
		AT1G74670	gibberellin-responsive protein, putative
		AT2G29980	FAD3 (FATTY ACID DESATURASE 3); omega-3 fatty acid desaturase
		AT2G37040	PAL1 (PHE AMMONIA LYASE 1); phenylalanine ammonia-lyase
		AT3G21090	ABC transporter family protein
		AT3G21560	UGT84A2; UDP-glycosyltransferase/ sinapate 1-glucosyltransferase
		AT3G22840	ELIP1 (EARLY LIGHT-INDUCABLE PROTEIN); chlorophyll binding
		AT3G44450	hypothetical protein
		AT3G45060	ATNRT2 (Arabidopsis thaliana high affinity nitrate transporter 2); nitrate transmembrane transporter
		AT3G55720	hypothetical protein
		AT3G60290	oxidoreductase, acting on paired donors, with incorporation or reduction of molecular oxygen, 2-oxoglutarate as one donor, and incorporation of one atom each of oxygen into both donors
		AT4G01970	ATSTS (ARABIDOPSIS THALIANA STACHYOSE SYNTHASE); galactinol-raffinose galactosyltransferase/ hydrolase, hydrolyzing O-glycosyl compounds
		AT4G33980	hypothetical protein
		AT4G34710	ADC2 (ARGININE DECARBOXYLASE 2)
		AT4G37290	hypothetical protein
		AT4G38210	ATEXPA20 (ARABIDOPSIS THALIANA EXPANSIN A20)
		AT4G39070	zinc finger (B-box type) family protein
		AT5G05270	chalcone-flavanone isomerase family protein
		AT5G06980	hypothetical protein
		AT5G08640	FLS (FLAVONOL SYNTHASE)
		AT5G19520	mechanosensitive ion channel domain-containing protein / MS ion channel domain-containing protein
		AT5G20250	DIN10 (DARK INDUCIBLE 10); hydrolase, hydrolyzing O-glycosyl compounds
		AT5G40780	LHT1 (LYSINE HISTIDINE TRANSPORTER 1); amino acid transmembrane transporter
		AT5G57785	hypothetical protein
		AT5G62210	embryo-specific protein-related
		GO term: defense response
		AT1G01470	LEA14 (LATE EMBRYOGENESIS ABUNDANT 14)
		AT1G02205	CER1 (ECERIFERUM 1)
		AT1G03850	glutaredoxin family protein
		AT1G07260	UDP-glucoronosyl/UDP-glucosyl transferase family protein
		AT1G15010	hypothetical protein
		AT1G17380	JAZ5/TIFY11A (JASMONATE-ZIM-DOMAIN PROTEIN 5)
		AT1G17420	LOX3 (Lipoxygenase 3); iron ion binding / lipoxygenase/ metal ion binding / oxidoreductase, acting on single donors with incorporation of molecular oxygen, incorporation of two atoms of oxygen
		AT1G23130	Bet v I allergen family protein
		AT1G35310	MLP168 (MLP-LIKE PROTEIN 168)
		AT1G48500	JAZ4/TIFY6A (JASMONATE-ZIM-DOMAIN PROTEIN 4)
		AT1G51090	heavy-metal-associated domain-containing protein
		AT1G51890	leucine-rich repeat protein kinase, putative
		AT1G52030	MBP2 (MYROSINASE-BINDING PROTEIN 2)
		AT1G52040	MBP1 (MYROSINASE-BINDING PROTEIN 1)
		AT1G52400	BGL1 (BETA-GLUCOSIDASE HOMOLOG 1); hydrolase, hydrolyzing O-glycosyl compounds
		AT1G52410	TSA1 (TSK-ASSOCIATING PROTEIN 1)
		AT1G53130	stigma-specific Stig1 family protein
		AT1G53990	GLIP3 (GDSL-motif lipase 3); carboxylesterase/ lipase
		AT1G54040	ESP (EPITHIOSPECIFIER PROTEIN)
		AT1G55010	PDF1 (plant defensin 1)
		AT1G55020	LOX1 (Lipoxygenase 1); lipoxygenase
		AT1G61360	S-locus lectin protein kinase family protein
		AT1G61550	S-locus protein kinase, putative
		AT1G66540	cytochrome P450, putative
		AT1G67865	hypothetical protein
		AT1G70260	nodulin MtN21 family protein
		AT1G70830	MLP28 (MLP-LIKE PROTEIN 28)
		AT1G72520	lipoxygenase, putative
		AT1G73260	trypsin and protease inhibitor family protein / Kunitz family protein
		AT2G02120	LCR70/PDF2 (Low-molecular-weight cysteine-rich 70); protease inhibitor
		AT2G13810	ALD1 (AGD2-LIKE DEFENSE RESPONSE PROTEIN1); transaminase
		AT2G18660	EXLB3 (EXPANSIN-LIKE B3 PRECURSOR)
		AT2G19990	PR-1-LIKE (PATHOGENESIS-RELATED PROTEIN-1-LIKE)
		AT2G23560	hydrolase, alpha/beta fold family protein
		AT2G26010	PDF1 (plant defensin 1)
		AT2G26020	PDF1b (plant defensin 1b)
		AT2G26560	PLP2 (PHOSPHOLIPASE A 2A); nutrient reservoir
		AT2G33380	RD20 (RESPONSIVE TO DESSICATION 20); calcium ion binding
		AT2G34600	JAZ7/TIFY5B (JASMONATE-ZIM-DOMAIN PROTEIN 7)
		AT2G34930	disease resistance family protein
		AT2G37040	PAL1 (PHE AMMONIA LYASE 1); phenylalanine ammonia-lyase
		AT2G37870	protease inhibitor/seed storage/lipid transfer protein (LTP) family protein
		AT2G39050	hydroxyproline-rich glycoprotein family protein
		AT2G39730	RCA (RUBISCO ACTIVASE)
		AT2G40000	hypothetical protein
		AT2G42530	COR15B
		AT2G43510	ATTI1 (ARABIDOPSIS THALIANA TRYPSIN INHIBITOR PROTEIN 1)
		AT2G43910	thiol methyltransferase, putative
		AT2G45220	pectinesterase family protein
		AT3G01500	CA1 (CARBONIC ANHYDRASE 1); carbonate dehydratase/ zinc ion binding
		AT3G08870	lectin protein kinase, putative
		AT3G15020	malate dehydrogenase (NAD), mitochondrial, putative
		AT3G15356	legume lectin family protein
		AT3G19190	hypothetical protein
		AT3G22400	LOX5; lipoxygenase
		AT3G23550	MATE efflux family protein
		AT3G25882	NIMIN-2 (NIM1-INTERACTING 2)
		AT3G26450	major latex protein-related / MLP-related
		AT3G26460	major latex protein-related / MLP-related
		AT3G30775	ERD5 (EARLY RESPONSIVE TO DEHYDRATION 5); proline dehydrogenase
		AT3G45330	lectin protein kinase family protein
		AT3G45390	lectin protein kinase family protein
		AT3G45420	lectin protein kinase family protein
		AT3G45430	lectin protein kinase family protein
		AT3G48520	CYP94B3 (cytochrome P450, family 94, subfamily B, polypeptide 3); oxygen binding
		AT3G49110	ATPCA/ATPRX33/PRX33/PRXCA (PEROXIDASE 33); peroxidase
		AT3G50260	ATERF#011/CEJ1 (COOPERATIVELY REGULATED BY ETHYLENE AND JASMONATE 1); DNA binding / transcription factor
		AT3G50970	LTI30 (LOW TEMPERATURE-INDUCED 30)
		AT3G53980	protease inhibitor/seed storage/lipid transfer protein (LTP) family protein
		AT3G56410	hypothetical protein
		AT3G57260	BGL2 (PATHOGENESIS-RELATED PROTEIN 2); glucan 1,3-beta-glucosidase/ hydrolase, hydrolyzing O-glycosyl compounds
		AT3G61670	hypothetical protein
		AT4G08870	arginase, putative
		AT4G11460	protein kinase family protein
		AT4G11890	protein kinase family protein
		AT4G12470	protease inhibitor/seed storage/lipid transfer protein (LTP) family protein
		AT4G12480	pEARLI 1; lipid binding
		AT4G12490	protease inhibitor/seed storage/lipid transfer protein (LTP) family protein
		AT4G16260	glycosyl hydrolase family 17 protein
		AT4G16860	RPP4 (RECOGNITION OF PERONOSPORA PARASITICA 4)
		AT4G16950	RPP5 (RECOGNITION OF PERONOSPORA PARASITICA 5)
		AT4G19030	NLM1 (NOD26-like intrinsic protein 1;1); water channel
		AT4G20260	DREPP plasma membrane polypeptide family protein
		AT4G22470	protease inhibitor/seed storage/lipid transfer protein (LTP) family protein
		AT4G23230	protein kinase family protein
		AT4G23250	EMB1290 (EMBRYO DEFECTIVE 1290); kinase
		AT4G23260	protein kinase
		AT4G23310	receptor-like protein kinase, putative
		AT4G23670	major latex protein-related / MLP-related
		AT4G24180	hypothetical protein
		AT4G24460	hypothetical protein
		AT4G28460	hypothetical protein
		AT4G30650	hydrophobic protein, putative / low temperature and salt responsive protein, putative
		AT4G31950	CYP82C3 (cytochrome P450, family 82, subfamily C, polypeptide 3); oxygen binding
		AT4G31970	CYP82C2 (cytochrome P450, family 82, subfamily C, polypeptide 2); oxygen binding
		AT4G33300	ADR1-L1 (ADR1-LIKE 1); ATP binding / protein binding
		AT4G36280	ATP-binding region, ATPase-like domain-containing protein
		AT4G37290	hypothetical protein
		AT4G39830	L-ascorbate oxidase, putative
		AT5G01540	lectin protein kinase, putative
		AT5G03210	hypothetical protein
		AT5G03350	legume lectin family protein
		AT5G07390	ATRBOHA (RESPIRATORY BURST OXIDASE HOMOLOG A); FAD binding / calcium ion binding / iron ion binding / oxidoreductase
		AT5G07690	MYB29 (myb domain protein 29); DNA binding / transcription factor
		AT5G10520	RBK1 (ROP BINDING PROTEIN KINASES 1); kinase
		AT5G13220	JAS1/JAZ10/TIFY9 (JASMONATE-ZIM-DOMAIN PROTEIN 10)
		AT5G13320	PBS3 (AVRPPHB SUSCEPTIBLE 3)
		AT5G14180	MPL1 (MYZUS PERSICAE-INDUCED LIPASE 1); catalytic
		AT5G15130	WRKY72 (WRKY DNA-binding protein 72); transcription factor
		AT5G22570	WRKY38 (WRKY DNA-binding protein 38); transcription factor
		AT5G23820	MD-2-related lipid recognition domain-containing protein / ML domain-containing protein
		AT5G24770	VSP2 (VEGETATIVE STORAGE PROTEIN 2); acid phosphatase
		AT5G24780	VSP1 (VEGETATIVE STORAGE PROTEIN 1)
		AT5G36910	THI2 (THIONIN 2); toxin receptor binding
		AT5G40780	LHT1 (LYSINE HISTIDINE TRANSPORTER 1); amino acid transmembrane transporter
		AT5G40990	GLIP1 (GDSL LIPASE1); carboxylesterase
		AT5G43570	serine-type endopeptidase inhibitor
		AT5G44420	PDF1 (Low-molecular-weight cysteine-rich 77)
		AT5G44430	PDF1c (plant defensin 1c)
		AT5G44568	hypothetical protein
		AT5G48485	DIR1 (DEFECTIVE IN INDUCED RESISTANCE 1); lipid binding
		AT5G51060	RHD2 (ROOT HAIR DEFECTIVE 2)
		AT5G53120	SPDS3 (SPERMIDINE SYNTHASE 3)
		AT5G57220	CYP81F2 (cytochrome P450, family 81, subfamily F, polypeptide 2); oxygen binding
		AT5G59260	lectin protein kinase, putative
		AT5G60600	GcpE (CHLOROPLAST BIOGENESIS 4)
		AT5G61010	ATEXO70E2 (EXOCYST SUBUNIT EXO70 FAMILY PROTEIN E2); protein binding
		AT5G64570	XYL4 (beta-xylosidase 4); hydrolase, hydrolyzing O-glycosyl compounds
		AT5G65600	legume lectin family protein / protein kinase family protein
		AT5G67160	transferase family protein
		GO term: glucosinolate biosynthetic process
		AT1G07640	OBP2 (OBF BINDING PROTEIN 2); DNA binding
		AT1G16400	CYP79F2 (cytochrome P450, family 79, subfamily F, polypeptide 2); oxygen binding
		AT1G16410	CYP79F1 (SUPERSHOOT 1)
		AT1G62540	flavin-containing monooxygenase family protein / FMO family protein
		AT1G62560	flavin-containing monooxygenase family protein / FMO family protein
		AT1G62570	flavin-containing monooxygenase family protein / FMO family protein
		AT1G65860	flavin-containing monooxygenase family protein / FMO family protein
		AT1G65880	BZO1; benzoate-CoA ligase
		AT1G76790	O-methyltransferase family 2 protein
		AT2G43100	aconitase C-terminal domain-containing protein
		AT5G05260	CYP79A2 (CYTOCHROME P450 79A2); oxygen binding
		AT5G07690	MYB29 (myb domain protein 29); DNA binding / transcription factor
		AT5G07700	MYB76 (myb domain protein 76); DNA binding / transcription factor
		AT5G23010	MAM1 (2-isopropylmalate synthase 3); 2-isopropylmalate synthase
		AT5G23020	IMS2/MAM-L/MAM3 (METHYLTHIOALKYMALATE SYNTHASE-LIKE); 2-isopropylmalate synthase/ methylthioalkylmalate synthase
		AT5G57220	CYP81F2 (cytochrome P450, family 81, subfamily F, polypeptide 2); oxygen binding
		GO term: response to insect
		AT1G07640	OBP2 (OBF BINDING PROTEIN 2); DNA binding
		AT1G16410	CYP79F1 (SUPERSHOOT 1)
		AT1G52400	BGL1 (BETA-GLUCOSIDASE HOMOLOG 1); hydrolase, hydrolyzing O-glycosyl compounds
		AT1G73260	trypsin and protease inhibitor family protein / Kunitz family protein
		AT1G74080	MYB122 (myb domain protein 122); DNA binding / transcription factor
		AT4G16740	ATTPS03 (Arabidopsis thaliana terpene synthase 03)
		AT5G07690	MYB29 (myb domain protein 29); DNA binding / transcription factor
		AT5G07700	MYB76 (myb domain protein 76); DNA binding / transcription factor
		AT5G23010	MAM1 (2-isopropylmalate synthase 3); 2-isopropylmalate synthase
		AT5G24770	VSP2 (VEGETATIVE STORAGE PROTEIN 2); acid phosphatase
		AT5G44420	PDF1 (Low-molecular-weight cysteine-rich 77)
		GO term: anthocyanin-containing compound biosynthesis
		AT1G56650	PAP1 (PRODUCTION OF ANTHOCYANIN PIGMENT 1); DNA binding / transcription factor
		AT1G71030	ATMYBL2 (Arabidopsis myb-like 2); DNA binding / transcription factor
		AT1G78600	zinc finger (B-box type) family protein
		AT3G21560	UGT84A2; UDP-glycosyltransferase/ sinapate 1-glucosyltransferase
		AT3G29590	AT5MAT; O-malonyltransferase/ transferase
		AT4G09820	TT8 (TRANSPARENT TESTA 8); DNA binding / transcription factor
		AT4G14090	UDP-glucoronosyl/UDP-glucosyl transferase family protein
		AT4G22880	LDOX (TANNIN DEFICIENT SEED 4)
		AT5G13930	ATCHS/CHS/TT4 (CHALCONE SYNTHASE); naringenin-chalcone synthase
		AT5G42800	DFR (DIHYDROFLAVONOL 4-REDUCTASE); dihydrokaempferol 4-reductase
		AT5G54060	UF3GT (UDP-GLUCOSE:FLAVONOID 3-O-GLUCOSYLTRANSFERASE); transferase, transferring glycosyl groups
		GO term: oxidation-reduction process
		AT1G02205	CER1 (ECERIFERUM 1)
		AT1G02400	ATGA2OX6/DTA1 (GIBBERELLIN 2-OXIDASE 6); gibberellin 2-beta-dioxygenase
		AT1G05575	hypothetical protein
		AT1G07180	ATNDI1/NDA1 (ALTERNATIVE NAD(P)H DEHYDROGENASE 1); NADH dehydrogenase
		AT1G12010	1-aminocyclopropane-1-carboxylate oxidase, putative / ACC oxidase, putative
		AT1G12740	CYP87A2 (cytochrome P450, family 87, subfamily A, polypeptide 2); oxygen binding
		AT1G17020	SRG1 (SENESCENCE-RELATED GENE 1); oxidoreductase, acting on paired donors, with incorporation or reduction of molecular oxygen, 2-oxoglutarate as one donor, and incorporation of one atom each of oxygen into both donors
		AT1G17420	LOX3 (Lipoxygenase 3); iron ion binding / lipoxygenase/ metal ion binding / oxidoreductase, acting on single donors with incorporation of molecular oxygen, incorporation of two atoms of oxygen
		AT1G19630	CYP722A1 (cytochrome P450, family 722, subfamily A, polypeptide 1); oxygen binding
		AT1G30760	FAD-binding domain-containing protein
		AT1G31600	oxidoreductase, 2OG-Fe(II) oxygenase family protein
		AT1G52820	2-oxoglutarate-dependent dioxygenase, putative
		AT1G55020	LOX1 (Lipoxygenase 1); lipoxygenase
		AT1G62540	flavin-containing monooxygenase family protein / FMO family protein
		AT1G62560	flavin-containing monooxygenase family protein / FMO family protein
		AT1G62570	flavin-containing monooxygenase family protein / FMO family protein
		AT1G64590	short-chain dehydrogenase/reductase (SDR) family protein
		AT1G65670	CYP702A1 (CYTOCHROME P450, FAMILY 702, SUBFAMILY A, POLYPEPTIDE 1); oxygen binding
		AT1G65860	flavin-containing monooxygenase family protein / FMO family protein
		AT1G72520	lipoxygenase, putative
		AT1G73680	pathogen-responsive alpha-dioxygenase, putative
		AT1G76680	OPR1 (12-oxophytodienoate reductase 1); 12-oxophytodienoate reductase
		AT1G80340	GA4H (gibberellin 3 beta-hydroxylase); gibberellin 3-beta-dioxygenase
		AT2G18660	EXLB3 (EXPANSIN-LIKE B3 PRECURSOR)
		AT2G19590	ACO1 (ACC OXIDASE 1); 1-aminocyclopropane-1-carboxylate oxidase
		AT2G21590	APL4 (large subunit of AGP 4); glucose-1-phosphate adenylyltransferase
		AT2G23630	SKS16 (SKU5 Similar 16); copper ion binding / pectinesterase
		AT2G29340	short-chain dehydrogenase/reductase (SDR) family protein
		AT2G29980	FAD3 (FATTY ACID DESATURASE 3); omega-3 fatty acid desaturase
		AT2G36690	oxidoreductase, 2OG-Fe(II) oxygenase family protein
		AT2G37240	antioxidant/ oxidoreductase
		AT2G37700	catalytic
		AT2G37760	aldo/keto reductase family protein
		AT2G41480	peroxidase
		AT2G41510	ATCKX1/CKX1 (CYTOKININ OXIDASE/DEHYDROGENASE 1); cytokinin dehydrogenase
		AT2G46740	FAD-binding domain-containing protein
		AT2G46750	FAD-binding domain-containing protein
		AT3G12900	oxidoreductase, 2OG-Fe(II) oxygenase family protein
		AT3G14940	ATPPC3 (PHOSPHOENOLPYRUVATE CARBOXYLASE 3); phosphoenolpyruvate carboxylase
		AT3G17070	peroxidase, putative
		AT3G22400	LOX5; lipoxygenase
		AT3G23510	cyclopropane fatty acid synthase, putative / CPA-FA synthase, putative
		AT3G23530	cyclopropane fatty acid synthase, putative / CPA-FA synthase, putative
		AT3G44730	kinesin motor protein-related
		AT3G44970	cytochrome P450 family protein
		AT3G45140	LOX2 (LIPOXYGENASE 2)
		AT3G50560	short-chain dehydrogenase/reductase (SDR) family protein
		AT3G51240	F3H (TRANSPARENT TESTA 6); naringenin 3-dioxygenase
		AT3G60750	transketolase, putative
		AT3G61400	2-oxoglutarate-dependent dioxygenase, putative
		AT3G63440	ATCKX6/ATCKX7/CKX6 (CYTOKININ OXIDASE/DEHYDROGENASE 6); cytokinin dehydrogenase
		AT4G04810	methionine sulfoxide reductase domain-containing protein / SeIR domain-containing protein
		AT4G11230	respiratory burst oxidase, putative / NADPH oxidase, putative
		AT4G15393	CYP702A5 (cytochrome P450, family 702, subfamily A, polypeptide 5); heme binding / iron ion binding / monooxygenase
		AT4G15396	CYP702A6 (cytochrome P450, family 702, subfamily A, polypeptide 6); heme binding / iron ion binding / monooxygenase
		AT4G15440	HPL1 (HYDROPEROXIDE LYASE 1); heme binding / iron ion binding / monooxygenase
		AT4G20235	pseudo
		AT4G21840	methionine sulfoxide reductase domain-containing protein / SelR domain-containing protein
		AT4G22870	leucoanthocyanidin dioxygenase, putative / anthocyanidin synthase, putative
		AT4G22880	LDOX (TANNIN DEFICIENT SEED 4)
		AT4G23340	oxidoreductase, 2OG-Fe(II) oxygenase family protein
		AT4G25420	GA5 (GA REQUIRING 5); gibberellin 20-oxidase/ gibberellin 3-beta-dioxygenase
		AT4G28720	flavin-containing monooxygenase family protein / FMO family protein
		AT4G32810	CCD8 (CAROTENOID CLEAVAGE DIOXYGENASE 8)
		AT4G39210	APL3 (large subunit of AGP 3)
		AT5G07390	ATRBOHA (RESPIRATORY BURST OXIDASE HOMOLOG A); FAD binding / calcium ion binding / iron ion binding / oxidoreductase
		AT5G24960	CYP71A14 (cytochrome P450, family 71, subfamily A, polypeptide 14); oxygen binding
		AT5G49730	ATFRO6/FRO6 (FERRIC REDUCTION OXIDASE 6); ferric-chelate reductase/ oxidoreductase
		AT5G49740	ATFRO7/FRO7 (FERRIC REDUCTION OXIDASE 7); ferric-chelate reductase/ oxidoreductase
		AT5G51060	RHD2 (ROOT HAIR DEFECTIVE 2)
		AT5G56970	CKX3 (CYTOKININ OXIDASE 3); cytokinin dehydrogenase
		AT5G57050	ABI2 (ABA INSENSITIVE 2); protein serine/threonine phosphatase
		AT5G62420	aldo/keto reductase family protein
		GO term: plant-type cell wall loosening
		AT1G12560	ATEXPA7 (ARABIDOPSIS THALIANA EXPANSIN A7)
		AT1G26770	ATEXPA10 (ARABIDOPSIS THALIANA EXPANSIN A10)
		AT1G65680	ATEXPB2 (ARABIDOPSIS THALIANA EXPANSIN B2)
		AT1G69530	ATEXPA1 (ARABIDOPSIS THALIANA EXPANSIN A1)
		AT2G03090	ATEXPA15 (ARABIDOPSIS THALIANA EXPANSIN A15)
		AT3G15370	ATEXPA12 (ARABIDOPSIS THALIANA EXPANSIN 12)
		AT4G30270	MERI5B (MERISTEM-5); hydrolase, acting on glycosyl bonds / xyloglucan:xyloglucosyl transferase
		AT4G38210	ATEXPA20 (ARABIDOPSIS THALIANA EXPANSIN A20)
		AT5G02260	ATEXPA9 (ARABIDOPSIS THALIANA EXPANSIN A9)
		AT5G56320	ATEXPA14 (ARABIDOPSIS THALIANA EXPANSIN A14)
		AT5G66460	(1-4)-beta-mannan endohydrolase, putative
		GO term: response to red light
		AT1G59940	ARR3 (RESPONSE REGULATOR 3); transcription regulator/ two-component response regulator
		AT1G69530	ATEXPA1 (ARABIDOPSIS THALIANA EXPANSIN A1)
		AT1G79600	ABC1 family protein
		AT1G80340	GA4H (gibberellin 3 beta-hydroxylase); gibberellin 3-beta-dioxygenase
		AT2G18010	auxin-responsive family protein
		AT2G21650	MEE3 (maternal effect embryo arrest 3); DNA binding / transcription factor
		AT3G22840	ELIP1 (EARLY LIGHT-INDUCABLE PROTEIN); chlorophyll binding
		AT3G27690	LHCB2:4 (Photosystem II light harvesting complex gene 2); chlorophyll binding
		AT4G13790	auxin-responsive protein, putative
		AT4G14690	ELIP2 (EARLY LIGHT-INDUCIBLE PROTEIN 2); chlorophyll binding
		AT4G33980	hypothetical protein
		AT5G24120	SIGE (RNA polymerase sigma subunit E); DNA binding / DNA-directed RNA polymerase/ sigma factor/ transcription factor
		AT5G24470	APRR5 (PSEUDO-RESPONSE REGULATOR 5); transcription regulator
		AT5G28490	LSH1 (LIGHT-DEPENDENT SHORT HYPOCOTYLS 1)
		AT5G52250	transducin family protein / WD-40 repeat family protein
		AT5G67030	ABA1 (ABA DEFICIENT 1); zeaxanthin epoxidase
		GO term: response to salt stress
		AT1G01620	PIP1C (PLASMA MEMBRANE INTRINSIC PROTEIN 1;3); water channel
		AT1G05680	UDP-glucoronosyl/UDP-glucosyl transferase family protein
		AT1G07400	17 kDa class I heat shock protein (HSP17-CI)
		AT1G16850	hypothetical protein
		AT1G35910	trehalose-6-phosphate phosphatase, putative
		AT1G43160	RAP2 (related to AP2 6); DNA binding / transcription factor
		AT1G47840	hexokinase, putative
		AT1G50960	ATGA2OX7 (GIBBERELLIN 2-OXIDASE 7); gibberellin 2-beta-dioxygenase/ gibberellin 20-oxidase
		AT1G52400	BGL1 (BETA-GLUCOSIDASE HOMOLOG 1); hydrolase, hydrolyzing O-glycosyl compounds
		AT1G56060	hypothetical protein
		AT1G56600	ATGOLS2 (ARABIDOPSIS THALIANA GALACTINOL SYNTHASE 2); transferase, transferring glycosyl groups / transferase, transferring hexosyl groups
		AT1G61340	F-box family protein
		AT1G65500	hypothetical protein
		AT1G70170	MMP (MATRIX METALLOPROTEINASE); metalloendopeptidase
		AT2G01900	endonuclease/exonuclease/phosphatase family protein
		AT2G02820	MYB88 (myb domain protein 88); DNA binding / transcription factor
		AT2G15390	FUT4 (fucosyltransferase 4); fucosyltransferase
		AT2G29500	17 kDa class I small heat shock protein (HSP17B-CI)
		AT2G33380	RD20 (RESPONSIVE TO DESSICATION 20); calcium ion binding
		AT2G35612	hypothetical protein
		AT2G36270	ABI5 (ABA INSENSITIVE 5); DNA binding / transcription activator/ transcription factor
		AT2G37760	aldo/keto reductase family protein
		AT2G38170	CAX1 (CATION EXCHANGER 1); calcium ion transmembrane transporter/ calcium:hydrogen antiporter
		AT2G39800	P5CS1 (DELTA1-PYRROLINE-5-CARBOXYLATE SYNTHASE 1)
		AT2G41010	ATCAMBP25 (ARABIDOPSIS THALIANA CALMODULIN (CAM)-BINDING PROTEIN OF 25 KDA); calmodulin binding
		AT2G41870	remorin family protein
		AT2G42540	COR15A (COLD-REGULATED 15A)
		AT2G47460	ATMYB12/MYB12 (MYB DOMAIN PROTEIN 12); DNA binding / transcription activator/ transcription factor
		AT2G47770	benzodiazepine receptor-related
		AT3G02140	TMAC2 (TWO OR MORE ABRES-CONTAINING GENE 2)
		AT3G49580	hypothetical protein
		AT3G50310	MAPKKK20 (Mitogen-activated protein kinase kinase kinase 20); kinase
		AT3G54770	RNA recognition motif (RRM)-containing protein
		AT3G63060	EDL3 (EID1-LIKE 3)
		AT4G11890	protein kinase family protein
		AT4G12480	pEARLI 1; lipid binding
		AT4G19810	glycosyl hydrolase family 18 protein
		AT4G20260	DREPP plasma membrane polypeptide family protein
		AT4G23600	CORI3 (CORONATINE INDUCED 1, JASMONIC ACID RESPONSIVE 2); transaminase
		AT4G34710	ADC2 (ARGININE DECARBOXYLASE 2)
		AT5G02020	hypothetical protein
		AT5G17960	DC1 domain-containing protein
		AT5G24090	acidic endochitinase (CHIB1)
		AT5G24120	SIGE (RNA polymerase sigma subunit E); DNA binding / DNA-directed RNA polymerase/ sigma factor/ transcription factor
		AT5G24770	VSP2 (VEGETATIVE STORAGE PROTEIN 2); acid phosphatase
		AT5G25610	RD22 (RESPONSIVE TO DESSICATION 22)
		AT5G28510	glycosyl hydrolase family 1 protein
		AT5G44610	MAP18 (MICROTUBULE-ASSOCIATED PROTEIN 18); microtubule binding
		AT5G46830	basic helix-loop-helix (bHLH) family protein
		AT5G49630	AAP6 (AMINO ACID PERMEASE 6); amino acid transmembrane transporter
		AT5G50720	ATHVA22E (Arabidopsis thaliana HVA22 homologue E)
		AT5G52300	LTI65/RD29B (RESPONSIVE TO DESSICATION 29B)
		AT5G52310	COR78 (COLD REGULATED 78)
		AT5G59310	LTP4 (LIPID TRANSFER PROTEIN 4); lipid binding
		AT5G62490	ATHVA22B (Arabidopsis thaliana HVA22 homologue B)
		AT5G62520	SRO5 (SIMILAR TO RCD ONE 5); NAD+ ADP-ribosyltransferase
		AT5G62530	ALDH12A1 (Aldehyde dehydrogenase 12A1); 1-pyrroline-5-carboxylate dehydrogenase/ 3-chloroallyl aldehyde dehydrogenase
		AT5G63650	SNRK2-5/SNRK2/SRK2H (SNF1-RELATED PROTEIN KINASE 2); kinase
		GO term: cellular response to abscisic acid stimulus
		AT1G01720	ATAF1 (Arabidopsis NAC domain containing protein 2); transcription factor
		AT1G05680	UDP-glucoronosyl/UDP-glucosyl transferase family protein
		AT1G07430	protein phosphatase 2C, putative / PP2C, putative
		AT1G13300	myb family transcription factor
		AT1G15380	lactoylglutathione lyase family protein / glyoxalase I family protein
		AT1G52400	BGL1 (BETA-GLUCOSIDASE HOMOLOG 1); hydrolase, hydrolyzing O-glycosyl compounds
		AT1G67710	ARR11 (RESPONSE REGULATOR 11); transcription factor/ two-component response regulator
		AT1G69260	hypothetical protein
		AT1G70800	C2 domain-containing protein
		AT2G18470	protein kinase family protein
		AT2G26040	Bet v I allergen family protein
		AT2G31470	F-box family protein
		AT2G38310	hypothetical protein
		AT2G40330	Bet v I allergen family protein
		AT2G41230	hypothetical protein
		AT2G41940	ZFP8 (ZINC FINGER PROTEIN 8); nucleic acid binding / transcription factor/ zinc ion binding
		AT2G43140	DNA binding / transcription factor
		AT2G46680	ATHB-7 (ARABIDOPSIS THALIANA HOMEOBOX 7); transcription factor
		AT3G02140	TMAC2 (TWO OR MORE ABRES-CONTAINING GENE 2)
		AT3G27690	LHCB2:4 (Photosystem II light harvesting complex gene 2); chlorophyll binding
		AT3G50310	MAPKKK20 (Mitogen-activated protein kinase kinase kinase 20); kinase
		AT3G59220	PRN (PIRIN); calmodulin binding
		AT3G60090	VQ motif-containing protein
		AT3G63060	EDL3 (EID1-LIKE 3)
		AT4G11890	protein kinase family protein
		AT4G36830	GNS1/SUR4 membrane family protein
		AT5G01540	lectin protein kinase, putative
		AT5G05440	hypothetical protein
		AT5G10720	AHK5 (CYTOKININ INDEPENDENT 2)
		AT5G13170	nodulin MtN3 family protein
		AT5G28770	BZO2H3 (ARABIDOPSIS THALIANA BASIC LEUCINE ZIPPER 63); DNA binding / transcription factor
		AT5G44120	CRA1 (CRUCIFERINA); nutrient reservoir
		AT5G45830	DOG1 (DELAY OF GERMINATION 1)
		AT5G52300	LTI65/RD29B (RESPONSIVE TO DESSICATION 29B)
		AT5G57050	ABI2 (ABA INSENSITIVE 2); protein serine/threonine phosphatase
		AT5G59220	protein phosphatase 2C, putative / PP2C, putative
		GO term: regulation of root development
		AT1G07640	OBP2 (OBF BINDING PROTEIN 2); DNA binding
		AT1G31670	copper amine oxidase, putative
		AT1G67710	ARR11 (RESPONSE REGULATOR 11); transcription factor/ two-component response regulator
		AT2G02820	MYB88 (myb domain protein 88); DNA binding / transcription factor
		AT2G04025	hypothetical protein
		AT2G22125	binding
		AT2G33790	pollen Ole e 1 allergen and extensin family protein
		AT2G35612	hypothetical protein
		AT2G47270	transcription factor/ transcription regulator
		AT3G05930	GLP8 (GERMIN-LIKE PROTEIN 8); manganese ion binding / metal ion binding / nutrient reservoir
		AT3G24240	leucine-rich repeat transmembrane protein kinase, putative
		AT3G50310	MAPKKK20 (Mitogen-activated protein kinase kinase kinase 20); kinase
		AT4G11880	AGL14 (AGAMOUS-LIKE 14); DNA binding / transcription factor
		AT4G28460	hypothetical protein
		AT4G37290	hypothetical protein
		AT5G52310	COR78 (COLD REGULATED 78)
		GO term: response to cold
		AT1G16390	ATOCT3 (ARABIDOPSIS THALIANA ORGANIC CATION/CARNITINE TRANSPORTER2); carbohydrate transmembrane transporter/ sugar:hydrogen ion symporter
		AT1G22770	GI (GIGANTEA); binding
		AT1G43160	RAP2 (related to AP2 6); DNA binding / transcription factor
		AT1G47840	hexokinase, putative
		AT1G48500	JAZ4/TIFY6A (JASMONATE-ZIM-DOMAIN PROTEIN 4)
		AT1G52690	late embryogenesis abundant protein, putative / LEA protein, putative
		AT1G55920	AtSerat2;1 (SERINE ACETYLTRANSFERASE 1)
		AT1G56600	ATGOLS2 (ARABIDOPSIS THALIANA GALACTINOL SYNTHASE 2); transferase, transferring glycosyl groups / transferase, transferring hexosyl groups
		AT1G65500	hypothetical protein
		AT2G16280	very-long-chain fatty acid condensing enzyme, putative
		AT2G21490	LEA (DEHYDRIN LEA)
		AT2G33380	RD20 (RESPONSIVE TO DESSICATION 20); calcium ion binding
		AT2G37760	aldo/keto reductase family protein
		AT2G38170	CAX1 (CATION EXCHANGER 1); calcium ion transmembrane transporter/ calcium:hydrogen antiporter
		AT2G39730	RCA (RUBISCO ACTIVASE)
		AT2G42530	COR15B
		AT2G42540	COR15A (COLD-REGULATED 15A)
		AT3G01500	CA1 (CARBONIC ANHYDRASE 1); carbonate dehydratase/ zinc ion binding
		AT3G16690	nodulin MtN3 family protein
		AT3G22840	ELIP1 (EARLY LIGHT-INDUCABLE PROTEIN); chlorophyll binding
		AT3G25770	AOC2 (ALLENE OXIDE CYCLASE 2)
		AT3G27690	LHCB2:4 (Photosystem II light harvesting complex gene 2); chlorophyll binding
		AT3G50260	ATERF#011/CEJ1 (COOPERATIVELY REGULATED BY ETHYLENE AND JASMONATE 1); DNA binding / transcription factor
		AT3G50310	MAPKKK20 (Mitogen-activated protein kinase kinase kinase 20); kinase
		AT3G50970	LTI30 (LOW TEMPERATURE-INDUCED 30)
		AT3G55580	regulator of chromosome condensation (RCC1) family protein
		AT3G57260	BGL2 (PATHOGENESIS-RELATED PROTEIN 2); glucan 1,3-beta-glucosidase/ hydrolase, hydrolyzing O-glycosyl compounds
		AT4G02330	ATPMEPCRB; pectinesterase
		AT4G11890	protein kinase family protein
		AT4G12470	protease inhibitor/seed storage/lipid transfer protein (LTP) family protein
		AT4G12480	pEARLI 1; lipid binding
		AT4G16860	RPP4 (RECOGNITION OF PERONOSPORA PARASITICA 4)
		AT4G20260	DREPP plasma membrane polypeptide family protein
		AT4G24540	AGL24 (AGAMOUS-LIKE 24); protein binding / protein heterodimerization/ protein homodimerization/ transcription factor
		AT4G25140	OLEO1 (OLEOSIN1)
		AT4G33980	hypothetical protein
		AT4G34710	ADC2 (ARGININE DECARBOXYLASE 2)
		AT4G37610	BT5 (BTB and TAZ domain protein 5); protein binding / transcription regulator
		AT5G04530	beta-ketoacyl-CoA synthase family protein
		AT5G15960	KIN1
		AT5G15970	KIN2 (COLD-RESPONSIVE 6)
		AT5G16910	ATCSLD2 (Cellulose synthase-like D2); cellulose synthase/ transferase, transferring glycosyl groups
		AT5G20250	DIN10 (DARK INDUCIBLE 10); hydrolase, hydrolyzing O-glycosyl compounds
		AT5G24090	acidic endochitinase (CHIB1)
		AT5G44610	MAP18 (MICROTUBULE-ASSOCIATED PROTEIN 18); microtubule binding
		AT5G50720	ATHVA22E (Arabidopsis thaliana HVA22 homologue E)
		AT5G52300	LTI65/RD29B (RESPONSIVE TO DESSICATION 29B)
		AT5G52310	COR78 (COLD REGULATED 78)
		AT5G65080	AGL68/MAF5 (MADS AFFECTING FLOWERING 5); transcription factor
		AT5G66400	RAB18 (RESPONSIVE TO ABA 18)
		GO term: secondary metabolic process
		AT1G02940	ATGSTF5 (Arabidopsis thaliana Glutathione S-transferase (class phi) 5); glutathione transferase
		AT1G07640	OBP2 (OBF BINDING PROTEIN 2); DNA binding
		AT1G16400	CYP79F2 (cytochrome P450, family 79, subfamily F, polypeptide 2); oxygen binding
		AT1G16410	CYP79F1 (SUPERSHOOT 1)
		AT1G21100	O-methyltransferase, putative
		AT1G33540	SCPL18 (serine carboxypeptidase-like 18); serine carboxypeptidase
		AT1G47600	glycosyl hydrolase family 1 protein
		AT1G52400	BGL1 (BETA-GLUCOSIDASE HOMOLOG 1); hydrolase, hydrolyzing O-glycosyl compounds
		AT1G54040	ESP (EPITHIOSPECIFIER PROTEIN)
		AT1G59700	ATGSTU16 (Arabidopsis thaliana Glutathione S-transferase (class tau) 16); glutathione transferase
		AT1G61810	BGLU45; hydrolase, hydrolyzing O-glycosyl compounds
		AT1G62540	flavin-containing monooxygenase family protein / FMO family protein
		AT1G62560	flavin-containing monooxygenase family protein / FMO family protein
		AT1G62570	flavin-containing monooxygenase family protein / FMO family protein
		AT1G65860	flavin-containing monooxygenase family protein / FMO family protein
		AT1G65880	BZO1; benzoate-CoA ligase
		AT1G67980	CCoAMT (caffeoyl-CoA 3-O-methyltransferase); caffeoyl-CoA O-methyltransferase
		AT1G71030	ATMYBL2 (Arabidopsis myb-like 2); DNA binding / transcription factor
		AT1G73270	SCPL6 (serine carboxypeptidase-like 6); serine carboxypeptidase
		AT1G73280	SCPL3 (serine carboxypeptidase-like 3); serine carboxypeptidase
		AT1G76790	O-methyltransferase family 2 protein
		AT1G78360	ATGSTU21 (Arabidopsis thaliana Glutathione S-transferase (class tau) 21); glutathione transferase
		AT1G78370	ATGSTU20 (Arabidopsis thaliana Glutathione S-transferase (class tau) 20); glutathione transferase
		AT2G22420	peroxidase 17 (PER17) (P17)
		AT2G22990	SNG1 (SINAPOYLGLUCOSE 1); serine carboxypeptidase
		AT2G23000	SCPL10 (serine carboxypeptidase-like 10); serine carboxypeptidase
		AT2G23010	SCPL9; serine carboxypeptidase
		AT2G29450	ATGSTU5 (Arabidopsis thaliana Glutathione S-transferase (class tau) 5); glutathione transferase
		AT2G37040	PAL1 (PHE AMMONIA LYASE 1); phenylalanine ammonia-lyase
		AT2G41480	peroxidase
		AT2G43100	aconitase C-terminal domain-containing protein
		AT2G43910	thiol methyltransferase, putative
		AT3G12203	SCPL17 (serine carboxypeptidase-like 17); serine carboxypeptidase
		AT3G12240	SCPL15 (serine carboxypeptidase-like 15); serine carboxypeptidase
		AT3G12900	oxidoreductase, 2OG-Fe(II) oxygenase family protein
		AT3G21560	UGT84A2; UDP-glycosyltransferase/ sinapate 1-glucosyltransferase
		AT3G55580	regulator of chromosome condensation (RCC1) family protein
		AT3G62760	ATGSTF13 (Arabidopsis thaliana Glutathione S-transferase (class phi) 13); glutathione transferase
		AT4G09820	TT8 (TRANSPARENT TESTA 8); DNA binding / transcription factor
		AT4G22880	LDOX (TANNIN DEFICIENT SEED 4)
		AT4G34100	protein binding / zinc ion binding
		AT4G37430	CYP91A2 (CYTOCHROME P450 MONOOXYGENASE 91A2); oxygen binding
		AT4G37750	ANT (AINTEGUMENTA); DNA binding / transcription factor
		AT4G37970	mannitol dehydrogenase, putative
		AT5G05260	CYP79A2 (CYTOCHROME P450 79A2); oxygen binding
		AT5G05340	peroxidase, putative
		AT5G07690	MYB29 (myb domain protein 29); DNA binding / transcription factor
		AT5G07700	MYB76 (myb domain protein 76); DNA binding / transcription factor
		AT5G13930	ATCHS/CHS/TT4 (CHALCONE SYNTHASE); naringenin-chalcone synthase
		AT5G17220	ATGSTF12 (GLUTATHIONE S-TRANSFERASE 26); glutathione transferase
		AT5G23010	MAM1 (2-isopropylmalate synthase 3); 2-isopropylmalate synthase
		AT5G23020	IMS2/MAM-L/MAM3 (METHYLTHIOALKYMALATE SYNTHASE-LIKE); 2-isopropylmalate synthase/ methylthioalkylmalate synthase
		AT5G28510	glycosyl hydrolase family 1 protein
		AT5G41040	transferase family protein
		AT5G57220	CYP81F2 (cytochrome P450, family 81, subfamily F, polypeptide 2); oxygen binding
		GO term: response to far red light
		AT1G22770	GI (GIGANTEA); binding
		AT2G44910	homeobox-leucine zipper protein 4 (HB-4) / HD-ZIP protein 4
		AT3G22840	ELIP1 (EARLY LIGHT-INDUCABLE PROTEIN); chlorophyll binding
		AT3G27690	LHCB2:4 (Photosystem II light harvesting complex gene 2); chlorophyll binding
		AT4G13790	auxin-responsive protein, putative
		AT4G14130	XTR7 (XYLOGLUCAN ENDOTRANSGLYCOSYLASE 7); hydrolase, acting on glycosyl bonds
		AT4G14690	ELIP2 (EARLY LIGHT-INDUCIBLE PROTEIN 2); chlorophyll binding
		AT5G24120	SIGE (RNA polymerase sigma subunit E); DNA binding / DNA-directed RNA polymerase/ sigma factor/ transcription factor
		AT5G24470	APRR5 (PSEUDO-RESPONSE REGULATOR 5); transcription regulator
		AT5G28490	LSH1 (LIGHT-DEPENDENT SHORT HYPOCOTYLS 1)
		AT5G52250	transducin family protein / WD-40 repeat family protein
